# Supplementary material
Source: ML conference proceedings conference paper supplement (https://www.ecva.net/papers/eccv_2022/papers_ECCV/html/136960445_ECCV_2022_paper.php)
Supplement: Supplementary file 1 [file 136960445-supp.zip]

Archive with 8 entries (8 files):
- 5018-supp.pdf
- demo_altering_visage_styles.mp4
- demo_dependent.mp4
- demo_independent.mp4
- demo_independent_lrw.mp4
- LRW_test.txt
- LRW_train.txt
- LRW_val.txt
