# Supplementary material
Source: ML conference proceedings conference paper supplement (https://www.ecva.net/papers/eccv_2022/papers_ECCV/html/136960445_ECCV_2022_paper.php)
Supplement: Supplementary file 1 [file 136960445-supp.zip › LRW_test.txt]

4243 SERVICES/train/SERVICES_00456
4243 THING/train/THING_00846
4243 THINGS/train/THINGS_00812
4243 SPEND/train/SPEND_00483
4243 DIFFICULT/train/DIFFICULT_00382
4243 ACTUALLY/train/ACTUALLY_00195
4243 AGAIN/train/AGAIN_00149
4243 OFFICE/train/OFFICE_00833
4243 PAYING/train/PAYING_00300
4243 PUBLIC/train/PUBLIC_00082
4243 WAITING/train/WAITING_00290
4243 PAYING/train/PAYING_00180
4243 INSIDE/train/INSIDE_00674
4243 LEVELS/train/LEVELS_00725
4243 PUBLIC/train/PUBLIC_00111
4243 PERHAPS/train/PERHAPS_00811
4243 PROBABLY/train/PROBABLY_00745
4243 QUITE/train/QUITE_00273
4243 GOING/train/GOING_00963
4243 DEFICIT/train/DEFICIT_00830
4243 GETTING/train/GETTING_00251
4243 SYSTEM/train/SYSTEM_00269
4243 BUSINESS/train/BUSINESS_00659
4243 GLOBAL/train/GLOBAL_00691
4243 EXTRA/train/EXTRA_00678
4243 SITUATION/test/SITUATION_00037
4243 CANNOT/train/CANNOT_00547
4243 BECOME/train/BECOME_00550
4243 FIGHTING/train/FIGHTING_00636
4243 HAPPENING/val/HAPPENING_00029
4243 THESE/train/THESE_00680
4243 PEOPLE/train/PEOPLE_00404
4243 OTHER/train/OTHER_00029
4243 STARTED/train/STARTED_00168
4243 PUBLIC/train/PUBLIC_00012
4243 DESPITE/train/DESPITE_00215
4243 HUMAN/train/HUMAN_00972
4243 MONEY/train/MONEY_00287
4243 TIMES/train/TIMES_00202
4243 ASKING/train/ASKING_00189
4243 FRANCE/train/FRANCE_00099
4243 SECTOR/train/SECTOR_00207
4243 MIDDLE/train/MIDDLE_00389
4243 PARLIAMENT/train/PARLIAMENT_00608
4243 MONEY/train/MONEY_00768
4243 MOMENT/train/MOMENT_00864
4243 GROWTH/train/GROWTH_00460
4243 AFTER/train/AFTER_00055
4243 ECONOMIC/train/ECONOMIC_00269
4243 UNDERSTAND/train/UNDERSTAND_00302
4243 COUNCIL/train/COUNCIL_00856
4243 CHILDREN/train/CHILDREN_00294
4243 PROBABLY/train/PROBABLY_00897
4243 MATTER/train/MATTER_00585
4243 DIFFERENCE/train/DIFFERENCE_00851
4243 TALKING/train/TALKING_00778
4243 SAYING/train/SAYING_00376
4243 BUILDING/train/BUILDING_00867
4243 RIGHTS/train/RIGHTS_00083
4243 EVERYBODY/train/EVERYBODY_00053
4243 SERIOUS/train/SERIOUS_00117
4243 PROCESS/train/PROCESS_00771
4243 INVESTMENT/train/INVESTMENT_00505
4243 JUSTICE/train/JUSTICE_00605
4243 WORLD/train/WORLD_00427
4243 INTEREST/train/INTEREST_00247
4243 EVERYTHING/test/EVERYTHING_00015
4243 RIGHTS/train/RIGHTS_00591
4243 CRISIS/train/CRISIS_00760
4243 SENSE/train/SENSE_00765
4243 PARTIES/train/PARTIES_00190
4243 THIRD/train/THIRD_00259
4243 RATHER/train/RATHER_00346
4243 GENERAL/train/GENERAL_00717
4243 PROBLEMS/train/PROBLEMS_00693
4243 YEARS/train/YEARS_00764
4243 IMPORTANT/train/IMPORTANT_00298
4243 RUNNING/train/RUNNING_00364
4243 COUNCIL/train/COUNCIL_00334
4243 BETTER/train/BETTER_00303
4243 BILLION/train/BILLION_00667
4243 CONFERENCE/train/CONFERENCE_00056
4243 EVERYBODY/train/EVERYBODY_00758
4243 MONEY/train/MONEY_00495
4243 DEFICIT/train/DEFICIT_00872
4243 CONFERENCE/train/CONFERENCE_00043
4243 STARTED/train/STARTED_00372
4243 AGREEMENT/train/AGREEMENT_00508
4243 HIGHER/train/HIGHER_00736
4243 FINANCIAL/train/FINANCIAL_00916
4243 WORST/train/WORST_00607
4243 GROWTH/train/GROWTH_00529
4243 DOING/train/DOING_00800
4243 EVERYBODY/train/EVERYBODY_00178
4243 REMEMBER/train/REMEMBER_00499
4243 LEVEL/train/LEVEL_00257
4243 PEOPLE/train/PEOPLE_00183
4243 GENERAL/train/GENERAL_00723
4243 GOVERNMENT/train/GOVERNMENT_00296
4243 REPORT/train/REPORT_00433
4243 WAITING/train/WAITING_00684
4243 INTEREST/train/INTEREST_00654
4243 BETTER/train/BETTER_00233
4243 COUNTRY/train/COUNTRY_00023
4243 GIVEN/train/GIVEN_00111
4243 SERVICE/train/SERVICE_00124
4243 LIVING/train/LIVING_00729
4243 SENSE/train/SENSE_00586
4243 WRONG/train/WRONG_00678
4243 CONTROL/val/CONTROL_00025
4243 THING/train/THING_00887
4243 THING/train/THING_00731
4243 GENERAL/train/GENERAL_00541
4243 CHANGES/train/CHANGES_00672
4243 SPENDING/train/SPENDING_00204
4243 BRITAIN/train/BRITAIN_00488
4243 AHEAD/train/AHEAD_00580
4243 VIOLENCE/train/VIOLENCE_00247
4243 RIGHT/train/RIGHT_00061
4243 PROBLEMS/train/PROBLEMS_00275
4243 UNDERSTAND/train/UNDERSTAND_00093
4243 CLEAR/train/CLEAR_00884
4243 LEAVE/test/LEAVE_00021
4243 NATIONAL/train/NATIONAL_00387
4243 THESE/train/THESE_00577
4243 LOCAL/train/LOCAL_00608
4243 DEBATE/train/DEBATE_00650
4243 STATE/train/STATE_00610
4243 RATHER/train/RATHER_00080
4243 DOING/train/DOING_00629
4243 CRISIS/train/CRISIS_00331
4243 DAVID/train/DAVID_00914
4243 OFFICE/train/OFFICE_00917
4243 FRIDAY/train/FRIDAY_00853
4243 DOING/train/DOING_00419
4243 WANTED/train/WANTED_00574
4243 ECONOMY/train/ECONOMY_00352
4243 LEAVE/train/LEAVE_00791
4243 SAYING/train/SAYING_00213
4243 ALLOWED/train/ALLOWED_00482
4243 REMEMBER/train/REMEMBER_00252
4243 BUILDING/train/BUILDING_00467
4243 REASON/train/REASON_00216
4243 AMERICA/train/AMERICA_00287
4243 PERIOD/test/PERIOD_00027
4243 WHERE/train/WHERE_00993
4243 AHEAD/train/AHEAD_00419
4243 PERIOD/train/PERIOD_00436
4243 SHORT/train/SHORT_00473
4243 DEFICIT/train/DEFICIT_00881
4243 FIRST/train/FIRST_00989
4243 NUMBER/train/NUMBER_00994
4243 RULES/train/RULES_00782
4243 AGAIN/train/AGAIN_00467
4243 TRYING/train/TRYING_00788
4243 NEVER/train/NEVER_00948
4243 QUITE/train/QUITE_00316
4243 GIVING/train/GIVING_00428
4243 MONEY/train/MONEY_00749
4243 SAYING/train/SAYING_00696
4243 EXACTLY/train/EXACTLY_00594
4243 SENSE/train/SENSE_00423
4243 SAYING/train/SAYING_00079
4243 POLITICAL/test/POLITICAL_00033
4243 ACTUALLY/train/ACTUALLY_00606
4243 CONFERENCE/train/CONFERENCE_00355
4243 INTEREST/train/INTEREST_00214
4243 CRIME/train/CRIME_00359
4243 FRANCE/train/FRANCE_00118
4243 UNDER/train/UNDER_00892
4243 DIFFERENT/train/DIFFERENT_00193
4243 FIRST/train/FIRST_00219
4243 POLITICIANS/train/POLITICIANS_00863
4243 POLICY/train/POLICY_00861
4243 INTEREST/train/INTEREST_00345
4243 COUNCIL/train/COUNCIL_00962
4243 DEFICIT/train/DEFICIT_00233
4243 WELFARE/train/WELFARE_00702
4243 MONTHS/train/MONTHS_00353
4243 BUSINESSES/train/BUSINESSES_00766
4243 COUNCIL/train/COUNCIL_00529
4243 STARTED/train/STARTED_00285
4243 THROUGH/train/THROUGH_00836
4243 TIMES/train/TIMES_00788
4243 JUDGE/train/JUDGE_00645
4243 EDUCATION/train/EDUCATION_00501
4243 ALWAYS/train/ALWAYS_00417
4243 MONEY/train/MONEY_00113
4243 ORDER/train/ORDER_00305
4243 CLEAR/train/CLEAR_00394
4243 REMEMBER/train/REMEMBER_00644
4243 THINGS/train/THINGS_00727
4243 DEFICIT/train/DEFICIT_00710
4243 CLAIMS/train/CLAIMS_00632
4243 EXTRA/train/EXTRA_00463
4243 DEFICIT/train/DEFICIT_00742
4243 CHARGE/train/CHARGE_00659
4243 WOMEN/train/WOMEN_00636
4243 ALLOWED/train/ALLOWED_00305
4243 ACTUALLY/train/ACTUALLY_00288
4243 PRISON/train/PRISON_00354
4243 ORDER/train/ORDER_00507
4243 CRIME/train/CRIME_00613
4243 EUROPEAN/train/EUROPEAN_00696
4243 RIGHTS/train/RIGHTS_00348
4243 SPEND/train/SPEND_00429
4243 COUNTRY/train/COUNTRY_00595
4243 TOGETHER/test/TOGETHER_00029
4243 GLOBAL/train/GLOBAL_00905
4243 TRADE/train/TRADE_00645
4243 DEFICIT/train/DEFICIT_00018
4243 COUNTRIES/train/COUNTRIES_00788
4243 ENOUGH/train/ENOUGH_00790
4243 EVERY/train/EVERY_00794
4243 GROWTH/train/GROWTH_00855
4243 AGREE/train/AGREE_00703
4243 LEVEL/train/LEVEL_00537
4243 CRIME/train/CRIME_00527
4243 BUILDING/train/BUILDING_00063
4243 PROBLEMS/train/PROBLEMS_00443
4243 PAYING/train/PAYING_00603
4243 DEBATE/train/DEBATE_00966
4243 GEORGE/train/GEORGE_00219
4243 ECONOMIC/val/ECONOMIC_00007
4243 ASKING/train/ASKING_00060
4243 PROBLEMS/train/PROBLEMS_00787
4243 BENEFITS/train/BENEFITS_00858
4243 DIFFERENT/train/DIFFERENT_00468
4243 PARTIES/train/PARTIES_00971
4243 ABUSE/train/ABUSE_00346
4243 BUILDING/train/BUILDING_00104
4243 CONTROL/train/CONTROL_00386
4243 CRIME/train/CRIME_00319
4243 PEOPLE/train/PEOPLE_00629
4243 THEMSELVES/train/THEMSELVES_00786
4243 SPEND/train/SPEND_00604
4243 INVESTMENT/train/INVESTMENT_00213
4243 PAYING/train/PAYING_00682
4243 BENEFIT/train/BENEFIT_00399
4243 MEDICAL/train/MEDICAL_00180
4243 CHIEF/train/CHIEF_00607
4243 CASES/train/CASES_00257
4243 FUTURE/test/FUTURE_00006
4243 STARTED/train/STARTED_00188
4243 AGAINST/train/AGAINST_00507
4243 SERVICE/train/SERVICE_00778
4243 MILLION/train/MILLION_00452
4243 BETWEEN/train/BETWEEN_00825
4243 RESULT/test/RESULT_00022
4243 PRESS/train/PRESS_00923
4243 BEING/train/BEING_00315
4243 POLICY/train/POLICY_00567
4243 BENEFIT/train/BENEFIT_00695
4243 SERVICE/val/SERVICE_00010
4243 ABUSE/train/ABUSE_00459
4243 POSITION/train/POSITION_00919
4243 THINGS/train/THINGS_00948
4243 NEVER/train/NEVER_00327
4243 RULES/train/RULES_00671
4243 PROBLEMS/train/PROBLEMS_00139
4243 RESULT/train/RESULT_00888
4243 RECORD/train/RECORD_00584
4243 STAND/train/STAND_00402
4243 AGREE/train/AGREE_00803
4243 PROCESS/val/PROCESS_00035
4243 GROWING/train/GROWING_00903
4243 BUDGET/train/BUDGET_00434
4243 SCHOOL/train/SCHOOL_00738
4243 RATES/train/RATES_00518
4243 MAKING/train/MAKING_00711
4243 DEFICIT/train/DEFICIT_00817
4243 COUNTRY/train/COUNTRY_00301
4243 PROCESS/train/PROCESS_00597
4243 HOUSE/train/HOUSE_00530
4243 PROCESS/train/PROCESS_00343
4243 AMERICAN/train/AMERICAN_00673
4243 ATTACK/test/ATTACK_00020
4243 START/train/START_00076
4243 WOMEN/train/WOMEN_00197
4243 EXTRA/train/EXTRA_00816
4243 WHICH/train/WHICH_00105
4243 ANSWER/train/ANSWER_00041
4243 REMEMBER/train/REMEMBER_00237
4243 PUBLIC/train/PUBLIC_00232
4243 BUILDING/train/BUILDING_00778
4243 INVESTMENT/train/INVESTMENT_00408
4243 SOMETHING/train/SOMETHING_00685
4243 YEARS/train/YEARS_00110
4243 WHICH/test/WHICH_00038
4243 PARTY/train/PARTY_00448
4243 RIGHT/train/RIGHT_00966
4243 PLACE/train/PLACE_00532
4243 IMMIGRATION/train/IMMIGRATION_00082
4243 DEBATE/train/DEBATE_00800
4243 LEVEL/train/LEVEL_00611
4243 MARKET/test/MARKET_00046
4243 POSITION/train/POSITION_00831
4243 YOUNG/test/YOUNG_00034
4243 WORDS/train/WORDS_00483
4243 WORLD/train/WORLD_00396
4243 POLICY/train/POLICY_00367
4243 MEMBER/train/MEMBER_00236
4243 RATES/train/RATES_00373
4243 PRETTY/train/PRETTY_00510
4243 OFFICE/train/OFFICE_00856
4243 RULES/train/RULES_00509
4243 STILL/train/STILL_00623
4243 FORWARD/train/FORWARD_00583
4243 ENOUGH/train/ENOUGH_00747
4243 CONTINUE/train/CONTINUE_00407
4243 COUNTRIES/train/COUNTRIES_00226
4243 THESE/train/THESE_00385
4243 ABUSE/train/ABUSE_00911
4243 EVENTS/train/EVENTS_00219
4243 ACTUALLY/train/ACTUALLY_00334
4243 LIVING/train/LIVING_00449
4243 SERVICE/train/SERVICE_00085
4243 LIVING/train/LIVING_00334
4243 HOUSING/train/HOUSING_00469
4243 COUNTRIES/train/COUNTRIES_00739
4243 SERIOUS/train/SERIOUS_00007
4243 SECTOR/train/SECTOR_00404
4243 NEVER/train/NEVER_00843
4243 SPEND/train/SPEND_00643
4243 LEAVE/train/LEAVE_00691
4243 PROBABLY/train/PROBABLY_00654
4243 WAITING/train/WAITING_00165
4243 SERVICES/train/SERVICES_00544
4243 BECAUSE/train/BECAUSE_00564
4243 PERIOD/train/PERIOD_00023
4243 AGAINST/train/AGAINST_00961
4243 FINANCIAL/train/FINANCIAL_00558
4243 DIFFERENCE/train/DIFFERENCE_00449
4243 BRING/train/BRING_00108
4243 SEEMS/train/SEEMS_00040
4243 UNION/test/UNION_00011
4243 GROWTH/train/GROWTH_00827
4243 INTEREST/train/INTEREST_00165
4243 PROBABLY/train/PROBABLY_00748
4243 EVENTS/train/EVENTS_00156
4243 GIVEN/train/GIVEN_00034
4243 DEBATE/train/DEBATE_00103
4243 THINGS/train/THINGS_00088
4243 OFFICE/train/OFFICE_00208
4243 WHERE/train/WHERE_00098
4243 PRESS/train/PRESS_00395
4243 SYSTEM/train/SYSTEM_00001
4243 HOUSE/val/HOUSE_00027
4243 THOSE/train/THOSE_00425
4243 LEAST/train/LEAST_00965
4243 TRADE/train/TRADE_00282
4243 CHINA/test/CHINA_00027
4243 SOMEONE/test/SOMEONE_00046
4243 PRIVATE/train/PRIVATE_00582
4243 PROBABLY/train/PROBABLY_00343
4243 OTHER/train/OTHER_00691
4243 DESCRIBED/train/DESCRIBED_00020
4243 AGREEMENT/train/AGREEMENT_00576
4243 INVESTMENT/train/INVESTMENT_00054
4243 CHILD/train/CHILD_00891
4243 DIFFICULT/val/DIFFICULT_00037
4243 GROWTH/train/GROWTH_00607
4243 TAKEN/train/TAKEN_00898
4243 CANNOT/train/CANNOT_00213
4243 WORST/train/WORST_00122
4243 WRONG/train/WRONG_00581
4243 EDUCATION/train/EDUCATION_00488
4243 DECIDED/train/DECIDED_00084
4243 USING/train/USING_00866
4243 PERHAPS/train/PERHAPS_00170
4243 MAKING/train/MAKING_00975
4243 POLICY/train/POLICY_00129
4243 ANSWER/train/ANSWER_00610
4243 BEHIND/train/BEHIND_00052
4243 COUNCIL/train/COUNCIL_00725
4243 SERIOUS/train/SERIOUS_00088
4243 FORWARD/train/FORWARD_00973
4243 FACING/train/FACING_00097
4243 TRUST/train/TRUST_00742
4243 GERMANY/train/GERMANY_00487
4243 VOTERS/train/VOTERS_00215
4243 ELECTION/train/ELECTION_00554
4243 THING/val/THING_00001
4243 MONEY/train/MONEY_00457
4243 SEVERAL/train/SEVERAL_00236
4243 NIGHT/train/NIGHT_00310
4243 PROBLEM/train/PROBLEM_00604
4243 DEFICIT/train/DEFICIT_00752
4243 AUTHORITIES/train/AUTHORITIES_00102
4243 SERVICES/train/SERVICES_00924
4243 PARTY/train/PARTY_00189
4243 SCHOOL/train/SCHOOL_00144
4243 EUROPEAN/train/EUROPEAN_00223
4243 SECTOR/train/SECTOR_00515
4243 MAKING/train/MAKING_00913
4243 START/train/START_00958
4243 HOUSING/train/HOUSING_00057
4243 WOMEN/train/WOMEN_00312
4243 REASON/train/REASON_00039
4243 SYSTEM/train/SYSTEM_00448
4243 WOULD/train/WOULD_00234
4243 WEEKEND/train/WEEKEND_00452
4243 PARTIES/train/PARTIES_00435
4243 EUROPEAN/train/EUROPEAN_00386
4243 PERIOD/train/PERIOD_00596
4243 FRONT/train/FRONT_00053
4243 POLICY/train/POLICY_00566
4243 FINANCIAL/train/FINANCIAL_00999
4243 BUSINESSES/train/BUSINESSES_00046
4243 CLAIMS/train/CLAIMS_00358
4243 LEGAL/train/LEGAL_00105
4243 GIVEN/train/GIVEN_00272
4243 HOUSE/train/HOUSE_00357
4243 BUDGET/train/BUDGET_00224
4243 SOMEONE/train/SOMEONE_00453
4243 JUDGE/train/JUDGE_00572
4243 MOMENT/train/MOMENT_00874
4243 HOUSING/train/HOUSING_00236
4243 DEFICIT/train/DEFICIT_00047
4243 ABUSE/train/ABUSE_00938
4243 ALREADY/train/ALREADY_00379
4243 INSIDE/train/INSIDE_00669
4243 EVERYTHING/train/EVERYTHING_00999
4243 CHANGE/train/CHANGE_00960
4243 RIGHTS/train/RIGHTS_00866
4243 EVERYBODY/train/EVERYBODY_00162
4243 POSSIBLE/train/POSSIBLE_00427
4243 WHOLE/train/WHOLE_00840
4243 REMEMBER/train/REMEMBER_00838
4243 SYSTEM/test/SYSTEM_00035
4243 LEVELS/train/LEVELS_00031
4243 POLITICAL/train/POLITICAL_00178
4243 COURT/train/COURT_00576
4243 LONGER/train/LONGER_00025
4243 FUTURE/train/FUTURE_00202
4243 GREAT/train/GREAT_00473
4243 SPENDING/train/SPENDING_00037
4243 DOING/train/DOING_00614
4243 SERIOUS/train/SERIOUS_00908
4243 AMERICA/train/AMERICA_00006
4243 PARLIAMENT/train/PARLIAMENT_00095
4243 START/train/START_00136
4243 MARKET/train/MARKET_00683
4243 PARLIAMENT/train/PARLIAMENT_00920
4243 THINGS/train/THINGS_00887
4243 PROBLEMS/train/PROBLEMS_00037
4243 HAVING/train/HAVING_00880
4243 ANYTHING/train/ANYTHING_00403
4243 BRITISH/train/BRITISH_00287
4243 PROBABLY/train/PROBABLY_00930
4243 DEFICIT/train/DEFICIT_00281
4243 INFLATION/train/INFLATION_00076
4243 REALLY/train/REALLY_00484
4243 EDUCATION/train/EDUCATION_00836
4243 ECONOMY/test/ECONOMY_00039
4243 NEVER/train/NEVER_00930
4243 LONGER/train/LONGER_00119
4243 FRIDAY/train/FRIDAY_00254
4243 HOUSING/train/HOUSING_00241
4243 INTEREST/train/INTEREST_00328
4243 EVENTS/train/EVENTS_00037
4243 BENEFIT/train/BENEFIT_00350
4243 BEFORE/train/BEFORE_00546
4243 SPEND/train/SPEND_00455
4243 DEFICIT/train/DEFICIT_00031
4243 HIGHER/train/HIGHER_00843
4243 MONEY/train/MONEY_00307
4243 GIVEN/train/GIVEN_00118
4243 POLITICAL/train/POLITICAL_00598
4243 HAVING/test/HAVING_00007
4243 EVERYBODY/train/EVERYBODY_00163
4243 DEFICIT/train/DEFICIT_00721
4243 AMERICAN/train/AMERICAN_00568
4243 BUSINESSES/train/BUSINESSES_00577
4243 STARTED/train/STARTED_00449
4243 THINGS/train/THINGS_00075
4243 ECONOMIC/train/ECONOMIC_00751
4243 WAITING/train/WAITING_00769
4243 QUITE/train/QUITE_00145
4243 HAPPENED/train/HAPPENED_00797
4243 START/train/START_00183
4243 BUDGET/val/BUDGET_00018
4243 COURT/train/COURT_00486
4243 RATHER/train/RATHER_00366
4243 SECRETARY/train/SECRETARY_00668
4243 BUSINESS/train/BUSINESS_00232
4243 AGAIN/train/AGAIN_00649
4243 EUROPE/train/EUROPE_00238
4243 DOING/train/DOING_00132
4243 SERVICE/train/SERVICE_00995
4243 LONGER/train/LONGER_00843
4243 WHOLE/train/WHOLE_00210
4243 WORST/train/WORST_00573
4243 DEBATE/train/DEBATE_00417
4243 TRADE/test/TRADE_00005
4243 ALWAYS/train/ALWAYS_00872
4243 LOOKING/train/LOOKING_00787
4243 ASKING/train/ASKING_00944
4243 LONGER/train/LONGER_00259
4243 STILL/train/STILL_00270
4243 START/train/START_00196
4243 MAKES/train/MAKES_00894
4243 PEOPLE/train/PEOPLE_00804
4243 HOUSING/train/HOUSING_00902
4243 EUROPE/train/EUROPE_00571
4243 SOMETHING/train/SOMETHING_00629
4243 TRADE/train/TRADE_00662
4243 RESULT/train/RESULT_00503
4243 POLICY/train/POLICY_00407
4243 CHARGE/val/CHARGE_00030
4243 CASES/train/CASES_00835
4243 GROWTH/train/GROWTH_00454
4243 TALKING/train/TALKING_00574
4243 LABOUR/train/LABOUR_00833
4243 MEASURES/val/MEASURES_00049
4243 NEEDS/train/NEEDS_00405
4243 POSSIBLE/train/POSSIBLE_00364
4243 INVESTMENT/train/INVESTMENT_00178
4243 EXACTLY/train/EXACTLY_00629
4243 FRANCE/train/FRANCE_00243
4243 ECONOMIC/train/ECONOMIC_00968
4243 HOUSE/train/HOUSE_00514
4243 LIVING/train/LIVING_00165
4243 HAVING/train/HAVING_00900
4243 ALREADY/train/ALREADY_00911
4243 COUNTRY/train/COUNTRY_00399
4243 GIVING/train/GIVING_00409
4243 CASES/train/CASES_00056
4243 EXTRA/train/EXTRA_00046
4243 NEEDS/train/NEEDS_00538
4243 HAVING/train/HAVING_00098
4243 NEVER/train/NEVER_00261
4243 ORDER/train/ORDER_00628
4243 DEBATE/train/DEBATE_00490
4243 MEDICAL/train/MEDICAL_00703
4243 POSSIBLE/train/POSSIBLE_00257
4243 NEEDS/val/NEEDS_00026
4243 WESTERN/train/WESTERN_00157
4243 GIVING/train/GIVING_00979
4243 CHANGES/train/CHANGES_00908
4243 QUITE/train/QUITE_00554
4243 NEVER/train/NEVER_00490
4243 CANNOT/train/CANNOT_00813
4243 MONTHS/test/MONTHS_00050
4243 LEVEL/train/LEVEL_00781
4243 INSIDE/train/INSIDE_00009
4243 SPEND/train/SPEND_00671
4243 GENERAL/train/GENERAL_00493
4243 LEVEL/train/LEVEL_00915
4243 WORLD/train/WORLD_00958
4243 POINT/train/POINT_00613
4243 TRYING/train/TRYING_00011
4243 FINANCIAL/train/FINANCIAL_00341
4243 HAPPEN/test/HAPPEN_00018
4243 START/train/START_00105
4243 AHEAD/train/AHEAD_00990
4243 BUDGET/train/BUDGET_00528
4243 INDUSTRY/test/INDUSTRY_00043
4243 FINANCIAL/train/FINANCIAL_00340
4243 SERVICE/train/SERVICE_00793
4243 BENEFIT/train/BENEFIT_00249
4243 PARTY/train/PARTY_00650
4243 CONTROL/train/CONTROL_00941
4243 EXTRA/train/EXTRA_00428
4243 HAVING/train/HAVING_00421
5125 CONFLICT/train/CONFLICT_00335
5125 CHIEF/train/CHIEF_00083
5125 AGAIN/train/AGAIN_00514
5125 RIGHT/train/RIGHT_00533
5125 OPERATION/train/OPERATION_00083
5125 FIRST/train/FIRST_00226
5125 START/train/START_00347
5125 STAGE/train/STAGE_00881
5125 CONFLICT/train/CONFLICT_00740
5125 PRESIDENT/train/PRESIDENT_00667
5125 HOURS/train/HOURS_00533
5125 SENIOR/train/SENIOR_00191
5125 WOMEN/train/WOMEN_00385
5125 COURSE/train/COURSE_00526
5125 JAMES/train/JAMES_00353
5125 COUNCIL/train/COUNCIL_00832
5125 FIRST/train/FIRST_00687
5125 FOREIGN/train/FOREIGN_00066
5125 REFERENDUM/train/REFERENDUM_00398
5125 MEDIA/train/MEDIA_00009
5125 KNOWN/train/KNOWN_00573
5125 STILL/train/STILL_00628
5125 FORCES/train/FORCES_00836
5125 EDITOR/train/EDITOR_00488
5125 COURSE/train/COURSE_00732
5125 SYRIAN/train/SYRIAN_00351
5125 BORDER/train/BORDER_00060
5125 STILL/train/STILL_00393
5125 RESPONSE/train/RESPONSE_00272
5125 TRADE/train/TRADE_00781
5125 STATE/train/STATE_00631
5125 OTHER/train/OTHER_00294
5125 GERMANY/train/GERMANY_00789
5125 CONFLICT/train/CONFLICT_00289
5125 CANCER/train/CANCER_00196
5125 LITTLE/train/LITTLE_00240
5125 GLOBAL/train/GLOBAL_00087
5125 UNDER/train/UNDER_00051
5125 DESCRIBED/train/DESCRIBED_00621
5125 FRENCH/train/FRENCH_00045
5125 LIVING/train/LIVING_00870
5125 PLACE/train/PLACE_00236
5125 CAPITAL/train/CAPITAL_00831
5125 CLOSE/train/CLOSE_00124
5125 EDITOR/train/EDITOR_00898
5125 LIVING/train/LIVING_00569
5125 BIGGEST/train/BIGGEST_00174
5125 GROUND/train/GROUND_00171
5125 VIOLENCE/train/VIOLENCE_00023
5125 CHARGES/train/CHARGES_00364
5125 COMING/train/COMING_00757
5125 OFTEN/train/OFTEN_00650
5125 PHONE/train/PHONE_00581
5125 MEETING/train/MEETING_00186
5125 CONTINUE/train/CONTINUE_00028
5125 CAPITAL/train/CAPITAL_00383
5125 OUTSIDE/train/OUTSIDE_00029
5125 PUBLIC/train/PUBLIC_00702
5125 BLACK/train/BLACK_00314
5125 TALKS/train/TALKS_00108
5125 SUNDAY/train/SUNDAY_00068
5125 FRANCE/train/FRANCE_00533
5125 WATCHING/train/WATCHING_00496
5125 SPEAKING/train/SPEAKING_00471
5125 STATES/train/STATES_00536
5125 RECORD/train/RECORD_00507
5125 TALKS/train/TALKS_00190
5125 TRIAL/train/TRIAL_00431
5125 RUSSIAN/train/RUSSIAN_00134
5125 RUSSIA/train/RUSSIA_00112
5125 RECENT/train/RECENT_00812
5125 THIRD/train/THIRD_00355
5125 LEADERSHIP/train/LEADERSHIP_00251
5125 FORMER/train/FORMER_00433
5125 MARKET/train/MARKET_00445
5125 JUSTICE/train/JUSTICE_00914
5125 FRENCH/train/FRENCH_00618
5125 MILITARY/train/MILITARY_00294
5125 POLITICAL/train/POLITICAL_00637
5125 WEEKEND/train/WEEKEND_00748
5125 LIVING/train/LIVING_00709
5125 AMERICAN/train/AMERICAN_00471
5125 STORY/train/STORY_00341
5125 PRIVATE/train/PRIVATE_00486
5125 THOUSANDS/train/THOUSANDS_00198
5125 CHANGE/train/CHANGE_00195
5125 RUSSIA/train/RUSSIA_00223
5125 RIGHTS/train/RIGHTS_00920
5125 CAPITAL/train/CAPITAL_00891
5125 HAPPENED/train/HAPPENED_00032
5125 SITUATION/train/SITUATION_00759
5125 CURRENT/train/CURRENT_00481
5125 AHEAD/train/AHEAD_00547
5125 WOULD/train/WOULD_00700
5125 ALLEGATIONS/train/ALLEGATIONS_00692
5125 BEING/train/BEING_00793
5125 AGAINST/train/AGAINST_00352
5125 TRIAL/train/TRIAL_00434
5125 FRENCH/train/FRENCH_00823
5125 MEDICAL/train/MEDICAL_00618
5125 MONTH/train/MONTH_00697
5125 FRENCH/train/FRENCH_00597
5125 TODAY/train/TODAY_00227
5125 HEARD/train/HEARD_00953
5125 SERIES/train/SERIES_00442
5125 FIGURES/train/FIGURES_00166
5125 OTHER/train/OTHER_00642
5125 OBAMA/train/OBAMA_00130
5125 CENTRAL/train/CENTRAL_00767
5125 HOUSING/train/HOUSING_00828
5125 STARTED/train/STARTED_00919
5125 BROUGHT/train/BROUGHT_00277
5125 BETWEEN/train/BETWEEN_00945
5125 SEVEN/train/SEVEN_00772
5125 MASSIVE/train/MASSIVE_00760
5125 NORTH/train/NORTH_00438
5125 ENOUGH/train/ENOUGH_00913
5125 HAPPEN/train/HAPPEN_00445
5125 OBAMA/train/OBAMA_00623
5125 POLITICS/train/POLITICS_00638
5125 TALKING/train/TALKING_00664
5125 ALLOW/train/ALLOW_00534
5125 WORST/train/WORST_00080
5125 DESCRIBED/train/DESCRIBED_00421
5125 FRIDAY/train/FRIDAY_00706
5125 TRIAL/train/TRIAL_00488
5125 SYRIAN/train/SYRIAN_00757
5125 ACCORDING/train/ACCORDING_00159
5125 PROVIDE/train/PROVIDE_00106
5125 AREAS/train/AREAS_00020
5125 WORKING/train/WORKING_00986
5125 MEANS/train/MEANS_00139
5125 STATES/train/STATES_00323
5125 ALMOST/train/ALMOST_00182
5125 DECIDED/train/DECIDED_00722
5125 MIGRANTS/train/MIGRANTS_00632
5125 GROUND/train/GROUND_00626
5125 ALLOW/train/ALLOW_00004
5125 TRIAL/train/TRIAL_00392
5125 CLEAR/train/CLEAR_00310
5125 DESCRIBED/train/DESCRIBED_00274
5125 ABOUT/train/ABOUT_00149
5125 DETAILS/train/DETAILS_00349
5125 MONTH/train/MONTH_00299
5125 AFFECTED/train/AFFECTED_00583
5125 COMES/train/COMES_00561
5125 EMERGENCY/train/EMERGENCY_00550
5125 PROBABLY/train/PROBABLY_00983
5125 WEEKEND/train/WEEKEND_00092
5125 GEORGE/train/GEORGE_00184
5125 STATES/train/STATES_00052
5125 GROWING/train/GROWING_00528
5125 ABUSE/train/ABUSE_00961
5125 HOUSE/train/HOUSE_00998
5125 RECENT/train/RECENT_00965
5125 THOUSANDS/train/THOUSANDS_00389
5125 SITUATION/train/SITUATION_00256
5125 SPEAKING/train/SPEAKING_00402
5125 CHARGES/train/CHARGES_00012
5125 COMES/train/COMES_00733
5125 ANNOUNCED/train/ANNOUNCED_00541
5125 FRENCH/train/FRENCH_00825
5125 PRESSURE/train/PRESSURE_00511
5125 RECORD/train/RECORD_00326
5125 WOULD/train/WOULD_00848
5125 JAMES/train/JAMES_00550
5125 OBAMA/train/OBAMA_00460
5125 ANNOUNCED/train/ANNOUNCED_00169
5125 OFTEN/train/OFTEN_00832
5125 GIVING/train/GIVING_00733
5125 FORCES/train/FORCES_00783
5125 AGAIN/train/AGAIN_00072
5125 THOUSANDS/train/THOUSANDS_00044
5125 PRESSURE/train/PRESSURE_00356
5125 VICTIMS/train/VICTIMS_00311
5125 CAMERON/train/CAMERON_00775
5125 LONDON/train/LONDON_00397
5125 FOOTBALL/train/FOOTBALL_00283
5125 NORTH/train/NORTH_00761
5125 MISSING/train/MISSING_00206
5125 PRESIDENT/train/PRESIDENT_00640
5125 RUSSIAN/train/RUSSIAN_00657
5125 TALKS/train/TALKS_00101
5125 SECRETARY/train/SECRETARY_00387
5125 UNITED/train/UNITED_00653
5125 BECOME/train/BECOME_00480
5125 OFFICIALS/train/OFFICIALS_00629
5125 AUTHORITIES/train/AUTHORITIES_00259
5125 MAJOR/train/MAJOR_00082
5125 TALKS/train/TALKS_00289
5125 SUNDAY/train/SUNDAY_00379
5125 FRANCE/train/FRANCE_00418
5125 LEAVE/train/LEAVE_00602
5125 STATES/train/STATES_00004
5125 RUSSIAN/train/RUSSIAN_00065
5125 OFFICIALS/train/OFFICIALS_00862
5125 SECOND/train/SECOND_00822
5125 AMERICAN/train/AMERICAN_00389
5125 SECOND/train/SECOND_00835
5125 PRESS/train/PRESS_00138
5125 OPPOSITION/train/OPPOSITION_00457
5125 SUPPORT/train/SUPPORT_00339
5125 STATES/train/STATES_00635
5125 PRESIDENT/train/PRESIDENT_00193
5125 HUMAN/train/HUMAN_00610
5125 OPPOSITION/train/OPPOSITION_00083
5125 DESCRIBED/train/DESCRIBED_00762
5125 SHOULD/train/SHOULD_00847
5125 ANNOUNCED/train/ANNOUNCED_00851
5125 STORY/train/STORY_00607
5125 FORMER/train/FORMER_00471
5125 AFRICA/train/AFRICA_00782
5125 MILITARY/train/MILITARY_00989
5125 LONDON/train/LONDON_00472
5125 TRUST/train/TRUST_00619
5125 RUSSIA/train/RUSSIA_00361
5125 MILLIONS/train/MILLIONS_00854
5125 GERMANY/train/GERMANY_00707
5125 SEVEN/train/SEVEN_00418
5125 AUTHORITIES/train/AUTHORITIES_00656
5125 EVERY/train/EVERY_00238
5125 LEVELS/train/LEVELS_00173
5125 SOUTHERN/train/SOUTHERN_00006
5125 FRANCE/train/FRANCE_00415
5125 LONDON/train/LONDON_00486
5125 CAPITAL/train/CAPITAL_00905
5125 SCHOOL/train/SCHOOL_00593
5125 WOULD/train/WOULD_00285
5125 FIGURES/train/FIGURES_00293
5125 CHANGE/train/CHANGE_00424
5125 SOUTH/train/SOUTH_00328
5125 THERE/train/THERE_00188
5125 MINISTER/train/MINISTER_00717
5125 VOTERS/train/VOTERS_00782
5125 ASKING/train/ASKING_00270
5125 ALMOST/train/ALMOST_00433
5125 LEADERS/train/LEADERS_00579
5125 PRESIDENT/train/PRESIDENT_00260
5125 WELFARE/train/WELFARE_00735
5125 OPPOSITION/train/OPPOSITION_00120
5125 PLACE/train/PLACE_00312
5125 DEATH/train/DEATH_00685
5125 RUNNING/train/RUNNING_00783
5125 SYRIAN/train/SYRIAN_00544
5125 GERMANY/train/GERMANY_00966
5125 STORY/train/STORY_00987
5125 GIVEN/train/GIVEN_00606
5125 BUSINESSES/train/BUSINESSES_00167
5125 LIVING/train/LIVING_00273
5125 KILLED/train/KILLED_00633
5125 WHERE/train/WHERE_00949
5125 RUSSIA/train/RUSSIA_00876
5125 DEATH/train/DEATH_00713
5125 TEMPERATURES/train/TEMPERATURES_00353
5125 FRIDAY/train/FRIDAY_00526
5125 SYRIA/train/SYRIA_00469
5125 PHONE/train/PHONE_00568
5125 FIGHTING/train/FIGHTING_00965
5125 FORCES/train/FORCES_00264
5125 RUNNING/train/RUNNING_00767
5125 PARTIES/train/PARTIES_00061
5125 STATES/train/STATES_00497
5125 SOCIETY/train/SOCIETY_00516
5125 DECIDED/train/DECIDED_00345
5125 SERIES/train/SERIES_00699
5125 TOWARDS/train/TOWARDS_00444
5125 REPORTS/train/REPORTS_00997
5125 WATCHING/train/WATCHING_00012
5125 HUNDREDS/train/HUNDREDS_00804
5125 CAMPAIGN/train/CAMPAIGN_00172
5125 SPECIAL/train/SPECIAL_00240
5125 FORMER/train/FORMER_00536
5125 FIGHT/train/FIGHT_00435
5125 STORY/train/STORY_00663
5125 PRESIDENT/train/PRESIDENT_00710
5125 SINCE/train/SINCE_00234
5125 RIGHT/train/RIGHT_00985
5125 SYRIAN/train/SYRIAN_00798
5125 SINCE/train/SINCE_00111
5125 TOGETHER/train/TOGETHER_00187
5125 STORY/train/STORY_00095
5125 FORCE/train/FORCE_00380
5125 RUSSIA/train/RUSSIA_00466
5125 WEEKEND/train/WEEKEND_00536
5125 OTHERS/train/OTHERS_00632
5125 FIGHTING/train/FIGHTING_00006
5125 SOUTH/train/SOUTH_00025
5125 GOVERNMENT/train/GOVERNMENT_00815
5125 PRESS/train/PRESS_00456
5125 CAPITAL/train/CAPITAL_00941
5125 MINUTES/train/MINUTES_00565
5125 TRADE/train/TRADE_00712
5125 COULD/train/COULD_00938
5125 IMPACT/train/IMPACT_00979
5125 LONDON/train/LONDON_00072
5125 FORWARD/train/FORWARD_00035
5125 CASES/train/CASES_00873
5125 SEEMS/train/SEEMS_00251
5125 GERMANY/train/GERMANY_00109
5125 ASKING/train/ASKING_00507
5125 FORCES/train/FORCES_00570
5125 MOMENT/train/MOMENT_00569
5125 OFFICIALS/train/OFFICIALS_00041
5125 HUNDREDS/train/HUNDREDS_00256
5125 BETWEEN/train/BETWEEN_00201
5125 CLAIMS/train/CLAIMS_00461
5125 GERMANY/train/GERMANY_00956
5125 SERVICES/train/SERVICES_00285
5125 FORCES/train/FORCES_00139
5125 AGAINST/train/AGAINST_00230
5125 USING/train/USING_00320
5125 FOUND/train/FOUND_00696
5125 STATEMENT/train/STATEMENT_00038
5125 SYRIAN/train/SYRIAN_00262
5125 DECIDED/train/DECIDED_00837
5125 MEASURES/train/MEASURES_00477
5125 AFRICA/train/AFRICA_00519
5125 MOMENT/train/MOMENT_00560
5125 INSIDE/train/INSIDE_00671
5125 PEOPLE/train/PEOPLE_00796
5125 MILLION/train/MILLION_00562
5125 ALWAYS/train/ALWAYS_00812
5125 HEALTH/train/HEALTH_00218
5125 LEAVE/train/LEAVE_00442
5125 WITHIN/train/WITHIN_00297
5125 CAPITAL/train/CAPITAL_00738
5125 GAMES/train/GAMES_00231
5125 WORLD/train/WORLD_00513
5125 COUNCIL/train/COUNCIL_00933
5125 OFFICIALS/train/OFFICIALS_00831
5125 CALLED/train/CALLED_00607
5125 PLACE/train/PLACE_00560
5125 SINCE/train/SINCE_00391
5125 MEMBER/train/MEMBER_00225
5125 FINANCIAL/train/FINANCIAL_00825
5125 PRIVATE/train/PRIVATE_00198
5125 LOOKING/train/LOOKING_00539
5125 POINT/train/POINT_00868
5125 PROVIDE/train/PROVIDE_00307
5125 SIDES/train/SIDES_00726
5125 PRESIDENT/train/PRESIDENT_00436
5125 SEEMS/train/SEEMS_00775
5125 POLICY/train/POLICY_00185
5125 UNTIL/train/UNTIL_00699
5125 RUSSIA/train/RUSSIA_00076
5125 PARTS/train/PARTS_00748
5125 MEMBERS/train/MEMBERS_00405
5125 WATCHING/train/WATCHING_00217
5125 AUTHORITIES/train/AUTHORITIES_00363
5125 WOMEN/train/WOMEN_00897
5125 OBAMA/train/OBAMA_00082
5125 GIVING/train/GIVING_00661
5125 SEEMS/train/SEEMS_00012
5125 COURT/train/COURT_00102
5125 DEATH/train/DEATH_00204
5125 AGREEMENT/train/AGREEMENT_00019
5125 AMERICAN/train/AMERICAN_00020
5125 LEAST/train/LEAST_00586
5125 VIOLENCE/train/VIOLENCE_00188
5125 SCHOOL/train/SCHOOL_00108
5125 ATTACKS/train/ATTACKS_00326
5125 EVERYONE/train/EVERYONE_00712
5125 CHANGES/train/CHANGES_00355
5125 SCHOOLS/train/SCHOOLS_00424
5125 KNOWN/train/KNOWN_00263
5125 MEMBERS/train/MEMBERS_00382
5125 GERMANY/train/GERMANY_00135
5125 GAMES/train/GAMES_00684
5125 FACING/train/FACING_00776
5125 SERIES/train/SERIES_00196
5125 GROUP/train/GROUP_00061
5125 FOUND/train/FOUND_00095
5125 ALLOWED/train/ALLOWED_00310
5125 CHARGES/train/CHARGES_00844
5125 CONFLICT/train/CONFLICT_00617
5125 MISSING/train/MISSING_00570
5125 SECRETARY/train/SECRETARY_00944
5125 SOMETHING/train/SOMETHING_00260
5125 OPPOSITION/train/OPPOSITION_00330
5125 FOOTBALL/train/FOOTBALL_00263
5125 OBAMA/train/OBAMA_00017
5125 CHILD/train/CHILD_00340
5125 FRENCH/train/FRENCH_00158
5125 LARGE/train/LARGE_00252
5125 FOOTBALL/train/FOOTBALL_00221
5125 POLITICAL/train/POLITICAL_00210
5125 BORDER/train/BORDER_00025
5125 MATTER/train/MATTER_00122
5125 KILLED/train/KILLED_00696
5125 PRIME/train/PRIME_00817
5125 THREE/train/THREE_00349
5125 AGREEMENT/train/AGREEMENT_00700
5125 LOCAL/train/LOCAL_00754
5125 MAJORITY/train/MAJORITY_00492
5125 CHILDREN/train/CHILDREN_00338
5125 STATE/train/STATE_00793
5125 REPORTS/train/REPORTS_00464
5125 CHARGES/train/CHARGES_00151
5125 ACCESS/train/ACCESS_00541
5125 KILLED/train/KILLED_00769
5125 FACING/train/FACING_00125
5125 MEDICAL/train/MEDICAL_00704
5125 CANCER/train/CANCER_00567
5125 AFRICA/train/AFRICA_00765
5125 MURDER/train/MURDER_00986
5125 RETURN/train/RETURN_00384
5125 REFERENDUM/train/REFERENDUM_00506
5125 INDEPENDENT/train/INDEPENDENT_00215
5125 MEETING/train/MEETING_00021
5125 SECOND/train/SECOND_00010
5125 CAPITAL/train/CAPITAL_00822
5125 SECRETARY/train/SECRETARY_00838
5125 MEDIA/train/MEDIA_00571
5125 RUSSIAN/train/RUSSIAN_00327
5125 DEBATE/train/DEBATE_00822
5125 AROUND/train/AROUND_00356
5125 SYRIAN/train/SYRIAN_00820
5125 HOMES/train/HOMES_00651
5125 MEETING/train/MEETING_00572
5125 OUTSIDE/train/OUTSIDE_00581
5125 FIGURES/train/FIGURES_00324
5125 COUNCIL/train/COUNCIL_00575
5125 AFFAIRS/train/AFFAIRS_00834
5125 ATTACKS/train/ATTACKS_00802
5125 EUROPE/train/EUROPE_00313
5125 PRESSURE/train/PRESSURE_00625
5125 PRESS/train/PRESS_00435
5125 WATCHING/train/WATCHING_00016
5125 AMERICAN/train/AMERICAN_00278
5125 WATER/train/WATER_00442
5125 PERHAPS/train/PERHAPS_00457
5125 CAPITAL/train/CAPITAL_00205
5125 CAPITAL/train/CAPITAL_00907
5125 MARKET/train/MARKET_00146
5125 MILLION/train/MILLION_00910
5125 ALLOW/train/ALLOW_00117
5125 SEVERAL/train/SEVERAL_00665
5125 OPPOSITION/train/OPPOSITION_00816
5125 BELIEVE/train/BELIEVE_00799
5125 GLOBAL/train/GLOBAL_00531
5125 BECOME/train/BECOME_00320
5125 YEARS/train/YEARS_00677
5125 HOUSE/train/HOUSE_00860
5125 RUSSIAN/train/RUSSIAN_00620
5125 OUTSIDE/train/OUTSIDE_00094
5125 CAMPAIGN/train/CAMPAIGN_00963
5125 CAPITAL/train/CAPITAL_00322
5125 FIGHTING/train/FIGHTING_00298
5125 GEORGE/train/GEORGE_00009
5125 TALKS/train/TALKS_00669
5125 GAMES/train/GAMES_00771
5125 FINAL/train/FINAL_00595
5125 CLOSE/train/CLOSE_00168
5125 LIVING/train/LIVING_00560
5125 CHIEF/train/CHIEF_00210
5125 SYRIAN/train/SYRIAN_00763
5125 CANCER/train/CANCER_00421
5125 COUPLE/train/COUPLE_00540
5125 PERSON/train/PERSON_00538
5125 AGREEMENT/train/AGREEMENT_00630
5125 HUNDREDS/train/HUNDREDS_00019
5125 DAVID/train/DAVID_00791
5125 GROUND/train/GROUND_00036
5125 REPORT/train/REPORT_00475
5125 UNION/train/UNION_00761
5125 SPECIAL/train/SPECIAL_00846
5125 TALKS/train/TALKS_00152
5125 MINISTER/train/MINISTER_00381
5125 BROUGHT/train/BROUGHT_00258
5125 CHARGES/train/CHARGES_00390
5125 WORST/train/WORST_00699
5125 UNTIL/train/UNTIL_00341
5125 LEAST/train/LEAST_00680
5125 HUNDREDS/train/HUNDREDS_00050
5125 SIMPLY/train/SIMPLY_00321
5125 TRYING/train/TRYING_00353
5125 TOWARDS/train/TOWARDS_00528
5125 BLACK/train/BLACK_00021
5125 HOURS/train/HOURS_00793
5125 DAVID/train/DAVID_00983
5125 GAMES/train/GAMES_00763
5125 BEING/train/BEING_00915
5125 ABOUT/train/ABOUT_00705
5125 ENOUGH/train/ENOUGH_00740
5125 ABOUT/train/ABOUT_00851
5125 SUPPORT/train/SUPPORT_00081
5125 WORKING/train/WORKING_00215
5125 MINISTER/train/MINISTER_00271
5125 FORCE/train/FORCE_00844
5125 PRESSURE/train/PRESSURE_00479
5125 BUILD/train/BUILD_00312
5125 CONSERVATIVE/train/CONSERVATIVE_00556
5125 GREAT/train/GREAT_00426
5125 COMES/train/COMES_00779
5125 TALKING/train/TALKING_00957
5125 GIVEN/train/GIVEN_00784
5125 CAPITAL/train/CAPITAL_00955
5125 TAKING/train/TAKING_00274
5125 FAMILIES/train/FAMILIES_00883
5125 HAPPENED/train/HAPPENED_00171
5125 CANNOT/train/CANNOT_00195
5125 NORTHERN/train/NORTHERN_00164
5125 GENERAL/train/GENERAL_00139
5125 WOULD/train/WOULD_00729
5125 HUMAN/train/HUMAN_00262
5125 CHANGE/train/CHANGE_00871
5125 NORTHERN/train/NORTHERN_00369
5125 ALMOST/train/ALMOST_00498
5125 WALES/train/WALES_00711
5125 THEIR/train/THEIR_00395
5125 PAYING/train/PAYING_00795
5125 CONFLICT/train/CONFLICT_00157
5125 BEHIND/train/BEHIND_00273
5125 EXPECTED/train/EXPECTED_00782
5125 STAND/train/STAND_00434
5125 SINCE/train/SINCE_00516
5125 FORMER/train/FORMER_00342
5125 WOMEN/train/WOMEN_00620
5125 COMES/train/COMES_00826
5125 START/train/START_00485
5125 FOLLOWING/train/FOLLOWING_00600
5125 CONFERENCE/train/CONFERENCE_00808
5125 GOVERNMENT/train/GOVERNMENT_00943
5125 CAPITAL/train/CAPITAL_00332
5125 SYRIAN/train/SYRIAN_00094
5125 FORCE/train/FORCE_00657
5125 OFFICIALS/train/OFFICIALS_00034
5125 AUTHORITIES/train/AUTHORITIES_00263
5125 FOOTBALL/train/FOOTBALL_00997
5125 TEMPERATURES/train/TEMPERATURES_00502
5125 CURRENT/train/CURRENT_00583
5125 CONFLICT/train/CONFLICT_00658
5125 BORDER/train/BORDER_00225
5125 FORCES/train/FORCES_00044
5125 CHINA/train/CHINA_00351
5125 TALKS/train/TALKS_00333
5125 DESCRIBED/train/DESCRIBED_00847
5125 OFTEN/train/OFTEN_00619
5125 EASTERN/train/EASTERN_00511
5125 RECORD/train/RECORD_00912
5125 SEVERAL/train/SEVERAL_00996
5125 SERIES/train/SERIES_00089
5125 FINAL/train/FINAL_00426
5125 WEEKS/train/WEEKS_00279
5125 CONFERENCE/train/CONFERENCE_00418
5125 PHONE/train/PHONE_00734
5125 WITHOUT/train/WITHOUT_00753
5125 MINISTER/train/MINISTER_00176
5125 TALKS/train/TALKS_00171
5125 TRYING/train/TRYING_00235
5125 SINCE/train/SINCE_00375
5125 MANCHESTER/train/MANCHESTER_00450
5125 UNITED/train/UNITED_00672
5125 PRISON/train/PRISON_00742
5125 CONFLICT/train/CONFLICT_00908
5125 SECRETARY/train/SECRETARY_00847
5125 MIGRANTS/train/MIGRANTS_00871
5125 OPPOSITION/train/OPPOSITION_00105
5125 LIVES/train/LIVES_00443
5125 SYRIA/train/SYRIA_00520
5125 AFFAIRS/train/AFFAIRS_00683
5125 FOLLOWING/train/FOLLOWING_00970
5125 REPORTS/train/REPORTS_00969
5125 FORCES/train/FORCES_00262
5125 WITHOUT/train/WITHOUT_00292
5125 WORST/train/WORST_00643
5125 REPORT/train/REPORT_00097
5125 BORDER/train/BORDER_00311
5125 JAMES/train/JAMES_00677
5125 MILITARY/train/MILITARY_00843
5125 PRIME/train/PRIME_00483
5125 CLAIMS/train/CLAIMS_00590
5125 LEVEL/train/LEVEL_00595
5125 WORLD/train/WORLD_00966
5125 TRIAL/train/TRIAL_00061
5125 CONFERENCE/train/CONFERENCE_00347
5125 MEETING/train/MEETING_00196
5125 LEADER/train/LEADER_00110
5125 CRIME/train/CRIME_00753
5125 FOUND/train/FOUND_00274
5125 ARRESTED/train/ARRESTED_00627
5125 MILLION/train/MILLION_00654
5125 WESTERN/train/WESTERN_00926
5125 PRESIDENT/train/PRESIDENT_00560
5125 FINANCIAL/train/FINANCIAL_00490
5125 SEEMS/train/SEEMS_00519
5125 ANNOUNCED/train/ANNOUNCED_00380
5125 SYRIAN/train/SYRIAN_00306
5125 CHANGES/train/CHANGES_00593
5125 GERMANY/train/GERMANY_00969
5125 POINT/train/POINT_00389
5125 TALKS/train/TALKS_00325
5125 CONTROL/train/CONTROL_00329
5125 FORMER/train/FORMER_00171
5125 BLACK/train/BLACK_00819
5125 FORMER/train/FORMER_00539
5125 MEETING/train/MEETING_00811
5125 ABOUT/train/ABOUT_00322
5125 ENERGY/train/ENERGY_00425
5125 COMPANY/train/COMPANY_00112
5125 NIGHT/train/NIGHT_00666
5125 SEEMS/train/SEEMS_00809
5125 IMMIGRATION/train/IMMIGRATION_00077
5125 SERVICE/train/SERVICE_00549
5125 BEFORE/train/BEFORE_00308
5125 COMES/train/COMES_00462
5125 AMOUNT/train/AMOUNT_00101
5125 TALKS/train/TALKS_00292
5125 AFRICA/train/AFRICA_00396
5125 TOGETHER/train/TOGETHER_00415
5125 MILLIONS/train/MILLIONS_00519
5125 BECOME/train/BECOME_00297
5125 LIVES/train/LIVES_00340
5125 AMONG/train/AMONG_00741
5125 SPEECH/train/SPEECH_00256
5125 SINCE/train/SINCE_00394
5125 TODAY/train/TODAY_00672
5125 LEAVE/train/LEAVE_00486
5125 PRIVATE/train/PRIVATE_00068
5125 CURRENT/train/CURRENT_00372
5125 DEATH/train/DEATH_00984
5125 PRIME/train/PRIME_00031
5125 RUSSIAN/train/RUSSIAN_00023
5125 TALKS/train/TALKS_00276
5125 MAJOR/train/MAJOR_00161
5125 HUNDREDS/train/HUNDREDS_00066
5125 DAVID/train/DAVID_00559
5125 CONFLICT/train/CONFLICT_00854
5125 BECOME/train/BECOME_00906
5125 SPECIAL/train/SPECIAL_00718
5125 MAKES/train/MAKES_00059
5125 AHEAD/train/AHEAD_00124
5125 GROUND/train/GROUND_00657
5125 MEANS/train/MEANS_00554
5125 RUSSIA/train/RUSSIA_00642
5125 MEMBERS/train/MEMBERS_00485
5125 GEORGE/train/GEORGE_00941
5125 TOMORROW/train/TOMORROW_00987
5125 TRADE/train/TRADE_00139
5125 OFFICIALS/train/OFFICIALS_00384
5125 EXPECTED/train/EXPECTED_00700
5125 DURING/train/DURING_00483
5125 EXACTLY/train/EXACTLY_00071
5125 CONFLICT/train/CONFLICT_00203
5125 STATEMENT/train/STATEMENT_00205
5125 SUNDAY/train/SUNDAY_00084
5125 THOUSANDS/train/THOUSANDS_00795
5125 FRENCH/train/FRENCH_00861
5125 WRONG/train/WRONG_00373
5125 LEADER/train/LEADER_00636
5125 COUNCIL/train/COUNCIL_00765
5125 GREAT/train/GREAT_00740
5125 WORLD/train/WORLD_00186
5125 AMONG/train/AMONG_00817
5125 CHIEF/train/CHIEF_00721
5125 AUTHORITIES/train/AUTHORITIES_00462
5125 OTHERS/train/OTHERS_00831
5125 FORMER/train/FORMER_00809
5125 THOUSANDS/train/THOUSANDS_00300
5125 LEAVE/train/LEAVE_00697
5125 FORMER/train/FORMER_00699
5125 HAVING/train/HAVING_00608
5125 SEVERAL/train/SEVERAL_00844
5125 WORST/train/WORST_00306
5125 STATES/train/STATES_00015
5125 CURRENT/train/CURRENT_00240
5125 WORLD/train/WORLD_00077
5125 PRESIDENT/train/PRESIDENT_00798
5125 FRENCH/train/FRENCH_00622
5125 EMERGENCY/train/EMERGENCY_00586
5125 SYRIA/train/SYRIA_00723
5125 WORKING/train/WORKING_00070
5125 REPORT/train/REPORT_00094
5125 CAPITAL/train/CAPITAL_00672
5125 MISSING/train/MISSING_00041
5125 HOMES/train/HOMES_00215
5125 GERMANY/train/GERMANY_00711
5125 ACCESS/train/ACCESS_00242
5125 MESSAGE/train/MESSAGE_00665
5125 GERMANY/train/GERMANY_00975
5125 NORTH/train/NORTH_00712
5125 AFRICA/train/AFRICA_00587
5125 EXPECTED/train/EXPECTED_00239
5125 THEIR/train/THEIR_00346
5125 NATIONAL/train/NATIONAL_00564
5125 TRADE/train/TRADE_00571
5125 ACCESS/train/ACCESS_00998
5125 SPEAKING/train/SPEAKING_00030
5125 STRONG/train/STRONG_00903
5125 STATES/train/STATES_00475
5125 CENTRAL/train/CENTRAL_00127
5125 BEING/train/BEING_00756
5125 PLACE/train/PLACE_00498
5125 IMPACT/train/IMPACT_00932
5125 CHIEF/train/CHIEF_00692
5125 BUILDING/train/BUILDING_00201
5125 WAITING/train/WAITING_00669
5125 HUMAN/train/HUMAN_00409
5125 GROUND/train/GROUND_00448
5125 MEMBERS/train/MEMBERS_00078
5125 FORWARD/train/FORWARD_00150
5125 RUNNING/train/RUNNING_00757
5125 ACCESS/train/ACCESS_00711
5125 WARNING/train/WARNING_00462
5125 STREET/train/STREET_00082
5125 TALKS/train/TALKS_00296
5125 TODAY/train/TODAY_00206
5125 REPORT/train/REPORT_00604
5125 PHONE/train/PHONE_00759
5125 TIMES/train/TIMES_00361
5125 AMERICAN/train/AMERICAN_00138
5125 PARLIAMENT/train/PARLIAMENT_00907
5125 INDEPENDENT/train/INDEPENDENT_00921
5125 WORKERS/train/WORKERS_00133
5125 SHORT/train/SHORT_00067
5125 REPORT/train/REPORT_00937
5125 FRANCE/train/FRANCE_00054
5125 SCHOOLS/train/SCHOOLS_00277
5125 RUSSIAN/train/RUSSIAN_00108
5125 PRESIDENT/train/PRESIDENT_00060
5125 ATTACK/train/ATTACK_00698
5125 SYRIA/train/SYRIA_00766
5125 SECTOR/train/SECTOR_00073
5125 SECURITY/train/SECURITY_00434
5125 KILLED/train/KILLED_00312
5125 AFFAIRS/train/AFFAIRS_00175
5125 EUROPE/train/EUROPE_00042
5125 HEARD/train/HEARD_00469
5125 RUSSIA/train/RUSSIA_00899
5125 SERIES/train/SERIES_00059
5125 EXPECTED/train/EXPECTED_00483
5125 MILITARY/train/MILITARY_00858
5125 MILLIONS/train/MILLIONS_00687
5125 UNTIL/train/UNTIL_00040
5125 TALKS/train/TALKS_00670
5125 PLACE/train/PLACE_00545
5125 BEFORE/train/BEFORE_00549
5125 TALKS/train/TALKS_00981
5125 ABUSE/train/ABUSE_00560
5125 SIGNIFICANT/train/SIGNIFICANT_00693
5125 SOUTH/train/SOUTH_00885
5125 BEHIND/train/BEHIND_00275
5125 AUTHORITIES/train/AUTHORITIES_00512
6003 FIGHT/train/FIGHT_00094
6003 CALLED/train/CALLED_00151
6003 MAYBE/train/MAYBE_00726
6003 ENERGY/train/ENERGY_00200
6003 LARGE/train/LARGE_00755
6003 TRADE/train/TRADE_00178
6003 REASON/train/REASON_00888
6003 FAMILY/train/FAMILY_00198
6003 THOSE/train/THOSE_00518
6003 FORCE/train/FORCE_00362
6003 RATHER/train/RATHER_00649
6003 CAMPAIGN/train/CAMPAIGN_00544
6003 RUNNING/train/RUNNING_00149
6003 MIGHT/train/MIGHT_00818
6003 FOREIGN/train/FOREIGN_00556
6003 PERSONAL/train/PERSONAL_00083
6003 WHOLE/train/WHOLE_00702
6003 FIGURES/train/FIGURES_00685
6003 CHILDREN/train/CHILDREN_00554
6003 MINISTERS/train/MINISTERS_00172
6003 STATE/train/STATE_00456
6003 CHINA/train/CHINA_00169
6003 ITSELF/train/ITSELF_00237
6003 THEIR/train/THEIR_00576
6003 COMPANIES/train/COMPANIES_00979
6003 CHIEF/train/CHIEF_00882
6003 LONDON/train/LONDON_00482
6003 EUROPEAN/train/EUROPEAN_00403
6003 ALLOWED/train/ALLOWED_00207
6003 STATE/train/STATE_00770
6003 EXAMPLE/train/EXAMPLE_00711
6003 KNOWN/train/KNOWN_00992
6003 BRITAIN/train/BRITAIN_00041
6003 SMALL/train/SMALL_00568
6003 CHALLENGE/train/CHALLENGE_00247
6003 ENOUGH/train/ENOUGH_00132
6003 FIGURES/train/FIGURES_00346
6003 LEAST/train/LEAST_00004
6003 ANOTHER/train/ANOTHER_00017
6003 PERHAPS/train/PERHAPS_00040
6003 BETTER/train/BETTER_00087
6003 OBAMA/train/OBAMA_00420
6003 THERE/train/THERE_00641
6003 DESCRIBED/train/DESCRIBED_00696
6003 WHETHER/train/WHETHER_00237
6003 NORTH/train/NORTH_00582
6003 ANNOUNCED/train/ANNOUNCED_00615
6003 HIGHER/train/HIGHER_00110
6003 MEDIA/train/MEDIA_00206
6003 GENERAL/train/GENERAL_00149
6003 ALMOST/train/ALMOST_00591
6003 OUTSIDE/train/OUTSIDE_00588
6003 AUTHORITIES/train/AUTHORITIES_00887
6003 FUTURE/train/FUTURE_00333
6003 TRUST/train/TRUST_00102
6003 MAKES/train/MAKES_00606
6003 TRYING/train/TRYING_00443
6003 FUTURE/train/FUTURE_00834
6003 ANYTHING/train/ANYTHING_00933
6003 TODAY/train/TODAY_00739
6003 MURDER/train/MURDER_00280
6003 TOMORROW/train/TOMORROW_00393
6003 WATCHING/train/WATCHING_00672
6003 POTENTIAL/train/POTENTIAL_00262
6003 SIMPLY/train/SIMPLY_00392
6003 SECRETARY/train/SECRETARY_00364
6003 LIVING/train/LIVING_00576
6003 SOMETHING/train/SOMETHING_00734
6003 NORTH/train/NORTH_00262
6003 ACCESS/train/ACCESS_00838
6003 CUSTOMERS/train/CUSTOMERS_00204
6003 PARTY/train/PARTY_00518
6003 SENSE/train/SENSE_00993
6003 STILL/train/STILL_00263
6003 MEDIA/train/MEDIA_00552
6003 MINUTES/train/MINUTES_00826
6003 STATES/train/STATES_00915
6003 YOUNG/train/YOUNG_00665
6003 EASTERN/train/EASTERN_00983
6003 NIGHT/train/NIGHT_00818
6003 VICTIMS/train/VICTIMS_00633
6003 FAMILY/train/FAMILY_00436
6003 ASKING/train/ASKING_00790
6003 INFORMATION/train/INFORMATION_00517
6003 VICTIMS/train/VICTIMS_00752
6003 NEVER/train/NEVER_00068
6003 LEAST/train/LEAST_00051
6003 RIGHT/train/RIGHT_00062
6003 ECONOMIC/train/ECONOMIC_00184
6003 SPEAKING/train/SPEAKING_00578
6003 THERE/train/THERE_00149
6003 WORDS/train/WORDS_00649
6003 REPORTS/train/REPORTS_00637
6003 SEEMS/train/SEEMS_00596
6003 BUDGET/train/BUDGET_00984
6003 TOGETHER/train/TOGETHER_00214
6003 SIDES/train/SIDES_00842
6003 CAPITAL/train/CAPITAL_00473
6003 TONIGHT/train/TONIGHT_00441
6003 THOUSANDS/train/THOUSANDS_00631
6003 INSIDE/train/INSIDE_00631
6003 MAYBE/train/MAYBE_00380
6003 MARKET/train/MARKET_00621
6003 LONDON/train/LONDON_00850
6003 NATIONAL/train/NATIONAL_00389
6003 UNITED/train/UNITED_00954
6003 AMERICAN/train/AMERICAN_00260
6003 SOMEONE/train/SOMEONE_00529
6003 PRETTY/train/PRETTY_00979
6003 SOMETHING/train/SOMETHING_00691
6003 DIFFERENT/train/DIFFERENT_00908
6003 SECRETARY/train/SECRETARY_00990
6003 HUNDREDS/train/HUNDREDS_00385
6003 CONTINUE/train/CONTINUE_00942
6003 LABOUR/train/LABOUR_00837
6003 STAND/train/STAND_00065
6003 HUNDREDS/train/HUNDREDS_00403
6003 PRESIDENT/train/PRESIDENT_00258
6003 SINCE/train/SINCE_00748
6003 SOCIAL/train/SOCIAL_00747
6003 GEORGE/train/GEORGE_00627
6003 MIDDLE/train/MIDDLE_00123
6003 KNOWN/train/KNOWN_00751
6003 CHANGE/train/CHANGE_00505
6003 YEARS/train/YEARS_00421
6003 BLACK/train/BLACK_00239
6003 ATTACKS/train/ATTACKS_00508
6003 THINGS/train/THINGS_00841
6003 PRESIDENT/train/PRESIDENT_00617
6003 SPEND/train/SPEND_00790
6003 RIGHT/train/RIGHT_00779
6003 DAVID/train/DAVID_00731
6003 UNDERSTAND/train/UNDERSTAND_00589
6003 ATTACK/train/ATTACK_00964
6003 FOLLOWING/train/FOLLOWING_00410
6003 BETWEEN/train/BETWEEN_00631
6003 TONIGHT/train/TONIGHT_00493
6003 AMONG/train/AMONG_00017
6003 SOMEONE/train/SOMEONE_00120
6003 ITSELF/train/ITSELF_00863
6003 RUSSIA/train/RUSSIA_00185
6003 THREE/train/THREE_00831
6003 WOULD/train/WOULD_00192
6003 WARNING/train/WARNING_00475
6003 STATE/train/STATE_00815
6003 MURDER/train/MURDER_00564
6003 LABOUR/train/LABOUR_00112
6003 CONSERVATIVE/train/CONSERVATIVE_00132
6003 MAJORITY/train/MAJORITY_00998
6003 CHILD/train/CHILD_00433
6003 GENERAL/train/GENERAL_00347
6003 DECIDED/train/DECIDED_00485
6003 ITSELF/train/ITSELF_00809
6003 WHOLE/train/WHOLE_00003
6003 ASKED/train/ASKED_00618
6003 PROBLEM/train/PROBLEM_00224
6003 LIVES/train/LIVES_00830
6003 AFFAIRS/train/AFFAIRS_00593
6003 SUPPORT/train/SUPPORT_00165
6003 RUNNING/train/RUNNING_00551
6003 AMERICAN/train/AMERICAN_00935
6003 TONIGHT/train/TONIGHT_00782
6003 HEART/train/HEART_00373
6003 ALLOWED/train/ALLOWED_00009
6003 LONGER/train/LONGER_00334
6003 RUSSIAN/train/RUSSIAN_00683
6003 PRESIDENT/train/PRESIDENT_00529
6003 LEADER/train/LEADER_00869
6003 DAVID/train/DAVID_00540
6003 COUPLE/train/COUPLE_00817
6003 SPENDING/train/SPENDING_00216
6003 SPENT/train/SPENT_00666
6003 SPEECH/train/SPEECH_00872
6003 CHIEF/train/CHIEF_00713
6003 NIGHT/train/NIGHT_00219
6003 MESSAGE/train/MESSAGE_00811
6003 ACROSS/train/ACROSS_00167
6003 ISSUE/train/ISSUE_00859
6003 EXAMPLE/train/EXAMPLE_00716
6003 SINCE/train/SINCE_00980
6003 ANYTHING/train/ANYTHING_00070
6003 QUESTION/train/QUESTION_00820
6003 QUESTION/train/QUESTION_00491
6003 AFFAIRS/train/AFFAIRS_00914
6003 YOUNG/train/YOUNG_00411
6003 RATHER/train/RATHER_00639
6003 GOING/train/GOING_00308
6003 STATEMENT/train/STATEMENT_00944
6003 RESULT/train/RESULT_00193
6003 LEAVE/train/LEAVE_00934
6003 TRADE/train/TRADE_00309
6003 TOGETHER/train/TOGETHER_00983
6003 MOVING/train/MOVING_00272
6003 PARTS/train/PARTS_00220
6003 THROUGH/train/THROUGH_00977
6003 SOMETHING/train/SOMETHING_00568
6003 CLEAR/train/CLEAR_00249
6003 WRONG/train/WRONG_00046
6003 GROUP/train/GROUP_00032
6003 STILL/train/STILL_00078
6003 CRIME/train/CRIME_00267
6003 SPEECH/train/SPEECH_00309
6003 ECONOMY/train/ECONOMY_00289
6003 ATTACKS/train/ATTACKS_00709
6003 MAKING/train/MAKING_00680
6003 RECENT/train/RECENT_00587
6003 SOCIETY/train/SOCIETY_00085
6003 BRITAIN/train/BRITAIN_00459
6003 GROUND/train/GROUND_00582
6003 MATTER/train/MATTER_00392
6003 ANSWER/train/ANSWER_00320
6003 MEMBER/train/MEMBER_00671
6003 ACCORDING/train/ACCORDING_00425
6003 RATHER/train/RATHER_00252
6003 SCHOOL/train/SCHOOL_00465
6003 PERSONAL/train/PERSONAL_00486
6003 HOUSE/train/HOUSE_00818
6003 RIGHTS/train/RIGHTS_00289
6003 PARLIAMENT/train/PARLIAMENT_00387
6003 MILLION/train/MILLION_00095
6003 AMONG/train/AMONG_00575
6003 DIFFERENT/train/DIFFERENT_00088
6003 ARRESTED/train/ARRESTED_00134
6003 LONDON/train/LONDON_00394
6003 CHANGES/train/CHANGES_00199
6003 HAVING/train/HAVING_00373
6003 THOUSANDS/train/THOUSANDS_00247
6003 REPORTS/train/REPORTS_00402
6003 WANTED/train/WANTED_00706
6003 WHOLE/train/WHOLE_00636
6003 STREET/train/STREET_00315
6003 RETURN/train/RETURN_00318
6003 LABOUR/train/LABOUR_00986
6003 HOUSE/train/HOUSE_00140
6003 MEMBERS/train/MEMBERS_00290
6003 MAJOR/train/MAJOR_00017
6003 WANTS/train/WANTS_00740
6003 FOOTBALL/train/FOOTBALL_00227
6003 SCHOOLS/train/SCHOOLS_00493
6003 RUSSIAN/train/RUSSIAN_00527
6003 RUSSIA/train/RUSSIA_00125
6003 VICTIMS/train/VICTIMS_00396
6003 TRYING/train/TRYING_00018
6003 EXAMPLE/train/EXAMPLE_00361
6003 LEAST/train/LEAST_00131
6003 THINGS/train/THINGS_00070
6003 THREE/train/THREE_00583
6003 PRETTY/train/PRETTY_00250
6003 TAKING/train/TAKING_00683
6003 CHARGE/train/CHARGE_00391
6003 ORDER/train/ORDER_00231
6003 AGAIN/train/AGAIN_00379
6003 WHILE/train/WHILE_00686
6003 UNDERSTAND/train/UNDERSTAND_00710
6003 WEEKS/train/WEEKS_00560
6003 LEGAL/train/LEGAL_00289
6003 EDUCATION/train/EDUCATION_00188
6003 WHETHER/train/WHETHER_00494
6003 PARTS/train/PARTS_00973
6003 LEADER/train/LEADER_00066
6003 FOOTBALL/train/FOOTBALL_00810
6003 PARTY/train/PARTY_00912
6003 PERIOD/train/PERIOD_00688
6003 THROUGH/train/THROUGH_00110
6003 RATHER/train/RATHER_00808
6003 ANOTHER/train/ANOTHER_00546
6003 CERTAINLY/train/CERTAINLY_00616
6003 USING/train/USING_00857
6003 RIGHTS/train/RIGHTS_00079
6003 GIVING/train/GIVING_00920
6003 PRIME/train/PRIME_00613
6003 COMPANY/train/COMPANY_00911
6003 EXACTLY/train/EXACTLY_00468
6003 DAVID/train/DAVID_00340
6003 EXPECTED/train/EXPECTED_00444
6003 WORDS/train/WORDS_00713
6003 MINUTES/train/MINUTES_00426
6003 GOVERNMENT/train/GOVERNMENT_00610
6003 MINISTER/train/MINISTER_00932
6003 AMONG/train/AMONG_00419
6003 WHILE/train/WHILE_00737
6003 WELFARE/train/WELFARE_00034
6003 PEOPLE/train/PEOPLE_00004
6003 COURSE/train/COURSE_00848
6003 FORCES/train/FORCES_00451
6003 CANNOT/train/CANNOT_00524
6003 PERHAPS/train/PERHAPS_00599
6003 NUMBERS/train/NUMBERS_00929
6003 CHANCE/train/CHANCE_00910
6003 BEFORE/train/BEFORE_00990
6003 SPENT/train/SPENT_00122
6003 MURDER/train/MURDER_00297
6003 SYRIAN/train/SYRIAN_00053
6003 GREAT/train/GREAT_00625
6003 JUDGE/train/JUDGE_00279
6003 TONIGHT/train/TONIGHT_00766
6003 WORDS/train/WORDS_00463
6003 BANKS/train/BANKS_00096
6003 WELCOME/train/WELCOME_00894
6003 CLOSE/train/CLOSE_00649
6003 POLITICAL/train/POLITICAL_00700
6003 WANTS/train/WANTS_00934
6003 SUPPORT/train/SUPPORT_00663
6003 OTHERS/train/OTHERS_00226
6003 FORCE/train/FORCE_00001
6003 LATEST/train/LATEST_00228
6003 EMERGENCY/train/EMERGENCY_00115
6003 INFLATION/train/INFLATION_00477
6003 RETURN/train/RETURN_00285
6003 SEEMS/train/SEEMS_00253
6003 FORMER/train/FORMER_00381
6003 SPENT/train/SPENT_00128
6003 TOGETHER/train/TOGETHER_00472
6003 EVENING/train/EVENING_00968
6003 HAPPEN/train/HAPPEN_00160
6003 CHARGE/train/CHARGE_00042
6003 SENIOR/train/SENIOR_00903
6003 OBAMA/train/OBAMA_00174
6003 TOMORROW/train/TOMORROW_00362
6003 CAMERON/train/CAMERON_00353
6003 HAPPENED/train/HAPPENED_00479
6003 THEMSELVES/train/THEMSELVES_00421
6003 GREAT/train/GREAT_00315
6003 UNITED/train/UNITED_00007
6003 MAJORITY/train/MAJORITY_00899
6003 AFTERNOON/train/AFTERNOON_00037
6003 EUROPE/train/EUROPE_00812
6003 PERSON/train/PERSON_00279
6003 STREET/train/STREET_00122
6003 EDITOR/train/EDITOR_00682
6003 TIMES/train/TIMES_00717
6003 COULD/train/COULD_00580
6003 NEVER/train/NEVER_00373
6003 TERMS/train/TERMS_00025
6003 GREAT/train/GREAT_00445
6003 CHILDREN/train/CHILDREN_00006
6003 NEEDS/train/NEEDS_00704
6003 BANKS/train/BANKS_00002
6003 ACCUSED/train/ACCUSED_00448
6003 SENIOR/train/SENIOR_00221
6003 FIGHT/train/FIGHT_00250
6003 SINCE/train/SINCE_00075
6003 WORLD/train/WORLD_00638
6003 SECURITY/train/SECURITY_00303
6003 RESPONSE/train/RESPONSE_00057
6003 ALLEGATIONS/train/ALLEGATIONS_00941
6003 OTHERS/train/OTHERS_00122
6003 PRETTY/train/PRETTY_00720
6003 GROWING/train/GROWING_00808
6003 DOING/train/DOING_00959
6003 AFFECTED/train/AFFECTED_00232
6003 ECONOMY/train/ECONOMY_00186
6003 GROWING/train/GROWING_00630
6003 SEEMS/train/SEEMS_00115
6003 GROWING/train/GROWING_00910
6003 OTHER/train/OTHER_00090
6003 WORLD/train/WORLD_00332
6003 DEATH/train/DEATH_00566
6003 HAPPENED/train/HAPPENED_00300
6003 EMERGENCY/train/EMERGENCY_00225
6003 SIMPLY/train/SIMPLY_00542
6003 POWERS/train/POWERS_00805
6003 PARTS/train/PARTS_00098
6003 SEEMS/train/SEEMS_00577
6003 BRITAIN/train/BRITAIN_00648
6003 GOVERNMENT/train/GOVERNMENT_00920
6003 THESE/train/THESE_00708
6003 ACCUSED/train/ACCUSED_00530
6003 NIGHT/train/NIGHT_00075
6003 MAYBE/train/MAYBE_00743
6003 POSITION/train/POSITION_00060
6003 WORLD/train/WORLD_00858
6003 STAFF/train/STAFF_00032
6003 CONFERENCE/train/CONFERENCE_00468
6003 MURDER/train/MURDER_00352
6003 JUDGE/train/JUDGE_00585
6003 SENIOR/train/SENIOR_00703
6003 DESPITE/train/DESPITE_00530
6003 CENTRAL/train/CENTRAL_00108
6003 SPEND/train/SPEND_00361
6003 DESCRIBED/train/DESCRIBED_00521
6003 SEVEN/train/SEVEN_00946
6003 LEAST/train/LEAST_00603
6003 SECRETARY/train/SECRETARY_00037
6003 WESTERN/train/WESTERN_00759
6003 PROBABLY/train/PROBABLY_00002
6003 POINT/train/POINT_00996
6003 REFERENDUM/train/REFERENDUM_00845
6003 CHARGE/train/CHARGE_00185
6003 GETTING/train/GETTING_00186
6003 THREAT/train/THREAT_00145
6003 SECRETARY/train/SECRETARY_00280
6003 DAVID/train/DAVID_00921
6003 GROUP/train/GROUP_00796
6003 CONCERNS/train/CONCERNS_00716
6003 ALMOST/train/ALMOST_00563
6003 FRONT/train/FRONT_00574
6003 WOMEN/train/WOMEN_00851
6003 HAPPENED/train/HAPPENED_00465
6003 ACTION/train/ACTION_00122
6003 HUNDREDS/train/HUNDREDS_00115
6003 WOMEN/train/WOMEN_00337
6003 LEAVE/train/LEAVE_00495
6003 THROUGH/train/THROUGH_00486
6003 MAKING/train/MAKING_00756
6003 ITSELF/train/ITSELF_00309
6003 PRESS/train/PRESS_00241
6003 EASTERN/train/EASTERN_00015
6003 SPEAKING/train/SPEAKING_00310
6003 LONGER/train/LONGER_00684
6003 LEADERSHIP/train/LEADERSHIP_00054
6003 CHIEF/train/CHIEF_00744
6003 PARTIES/train/PARTIES_00394
6003 MAYBE/train/MAYBE_00615
6003 HUMAN/train/HUMAN_00414
6003 WATER/train/WATER_00790
6003 CALLED/train/CALLED_00672
6003 ORDER/train/ORDER_00931
6003 POLITICIANS/train/POLITICIANS_00110
6003 PARTY/train/PARTY_00207
6003 WANTS/train/WANTS_00574
6003 STILL/train/STILL_00777
6003 PERSONAL/train/PERSONAL_00709
6003 POLICY/train/POLICY_00838
6003 WATCHING/train/WATCHING_00755
6003 WORDS/train/WORDS_00126
6003 SPEND/train/SPEND_00019
6003 IMPORTANT/train/IMPORTANT_00921
6003 SHORT/train/SHORT_00070
6003 IMPORTANT/train/IMPORTANT_00753
6003 OFFICE/train/OFFICE_01000
6003 AHEAD/train/AHEAD_00471
6003 MATTER/train/MATTER_00065
6003 PARTY/train/PARTY_00437
6003 NIGHT/train/NIGHT_00986
6003 MATTER/train/MATTER_00756
6003 CHANCE/train/CHANCE_00709
6003 WHETHER/train/WHETHER_00266
6003 NIGHT/train/NIGHT_00147
6003 COUNTRIES/train/COUNTRIES_00430
6003 ORDER/train/ORDER_00314
6003 EVENING/train/EVENING_00087
6003 EUROPE/train/EUROPE_00129
6003 UNDERSTAND/train/UNDERSTAND_00261
6003 INTEREST/train/INTEREST_00823
6003 GEORGE/train/GEORGE_00407
6003 CLAIMS/train/CLAIMS_00791
6003 QUESTIONS/train/QUESTIONS_00925
6003 EARLY/train/EARLY_00242
6003 POLITICIANS/train/POLITICIANS_00999
6003 AFTER/train/AFTER_00582
6003 TRUST/train/TRUST_00371
6003 HUMAN/train/HUMAN_00332
6003 EXAMPLE/train/EXAMPLE_00147
6003 WEAPONS/train/WEAPONS_00687
6003 CHINA/train/CHINA_00089
6003 FORCES/train/FORCES_00160
6003 INQUIRY/train/INQUIRY_00038
6003 OTHERS/train/OTHERS_00338
6003 PRESSURE/train/PRESSURE_00025
6003 CONFLICT/train/CONFLICT_00880
6003 MEANS/train/MEANS_00687
6003 HAVING/train/HAVING_00953
6003 CHILDREN/train/CHILDREN_00908
6003 LIVES/train/LIVES_00071
6003 FAMILY/train/FAMILY_00455
6003 RATES/train/RATES_00801
6003 SOMETHING/train/SOMETHING_00726
6003 SERIES/train/SERIES_00561
6003 WITHIN/train/WITHIN_00320
6003 JUSTICE/train/JUSTICE_00426
6003 TAKING/train/TAKING_00995
6003 SAYING/train/SAYING_00218
6003 CALLED/train/CALLED_00790
6003 ENGLAND/train/ENGLAND_00226
6003 AMONG/train/AMONG_00009
6003 ASKING/train/ASKING_00011
6003 AMONG/train/AMONG_00357
6003 ISLAMIC/train/ISLAMIC_00646
6003 WHILE/train/WHILE_00420
6003 LEVEL/train/LEVEL_00516
6003 FINANCIAL/train/FINANCIAL_00838
6003 VIOLENCE/train/VIOLENCE_00059
6003 INFLATION/train/INFLATION_00053
6003 POLICE/train/POLICE_00572
6003 FRONT/train/FRONT_00654
6003 MOMENT/train/MOMENT_00439
6003 LONGER/train/LONGER_00805
6003 YOUNG/train/YOUNG_00509
6003 MASSIVE/train/MASSIVE_00198
6003 PARLIAMENT/train/PARLIAMENT_00009
6003 ALLOWED/train/ALLOWED_00372
6003 JAMES/train/JAMES_00111
6003 SCOTTISH/train/SCOTTISH_00206
6003 ANNOUNCED/train/ANNOUNCED_00476
6003 HAVING/train/HAVING_00518
6003 QUESTION/train/QUESTION_00110
6003 DESPITE/train/DESPITE_00322
6003 SPEECH/train/SPEECH_00067
6003 AFFECTED/train/AFFECTED_00663
6003 GEORGE/train/GEORGE_00802
6003 YESTERDAY/train/YESTERDAY_00028
6003 FRONT/train/FRONT_00213
6003 GROWING/train/GROWING_00285
6003 MONEY/train/MONEY_00641
6003 BILLION/train/BILLION_00910
6003 LONGER/train/LONGER_00721
6003 EVERYONE/train/EVERYONE_00553
6003 RUNNING/train/RUNNING_00945
6003 SPENT/train/SPENT_00134
6003 POLITICS/train/POLITICS_00872
6003 ALLEGATIONS/train/ALLEGATIONS_00213
6003 MEMBER/train/MEMBER_00143
6003 LEADER/train/LEADER_00481
6003 HAPPEN/train/HAPPEN_00185
6003 CONTROL/train/CONTROL_00011
6003 SCOTTISH/train/SCOTTISH_00913
6003 THOSE/train/THOSE_00182
6003 SYRIA/train/SYRIA_00890
6003 PUBLIC/train/PUBLIC_00061
6003 REASON/train/REASON_00672
6003 PRESS/train/PRESS_00396
6003 REPORTS/train/REPORTS_00154
6003 PROBLEMS/train/PROBLEMS_00183
6003 NEEDS/train/NEEDS_00480
6003 EASTERN/train/EASTERN_00230
6003 TIMES/train/TIMES_00475
6003 BUSINESS/train/BUSINESS_00996
6003 INDUSTRY/train/INDUSTRY_00891
6003 MEANS/train/MEANS_00334
6003 KNOWN/train/KNOWN_00933
6003 FIGHT/train/FIGHT_00548
6003 DOING/train/DOING_00262
6003 WITHOUT/train/WITHOUT_00655
6003 CHALLENGE/train/CHALLENGE_00504
6003 ECONOMY/train/ECONOMY_00074
6003 CONCERNS/train/CONCERNS_00462
6003 SHORT/train/SHORT_00258
6003 REPORTS/train/REPORTS_00213
6003 LIVING/train/LIVING_00319
6003 UNDERSTAND/train/UNDERSTAND_00578
6003 CHANGES/train/CHANGES_00647
6003 TONIGHT/train/TONIGHT_00810
6003 HAPPENED/train/HAPPENED_00666
6003 PROBABLY/train/PROBABLY_00886
6003 OBAMA/train/OBAMA_00550
6003 MOMENT/train/MOMENT_00087
6003 PRICE/train/PRICE_00441
6003 REPORT/train/REPORT_00150
6003 DEFICIT/train/DEFICIT_00777
6003 CHILDREN/train/CHILDREN_00921
6003 CHILDREN/train/CHILDREN_00651
6003 MAJORITY/train/MAJORITY_00965
6003 SIDES/train/SIDES_00279
6003 LEADERSHIP/train/LEADERSHIP_00322
6003 HOUSE/train/HOUSE_00845
6003 LEADER/train/LEADER_00861
6003 RIGHT/train/RIGHT_00523
6003 EVERY/train/EVERY_00108
6003 ABUSE/train/ABUSE_00402
6003 CONTINUE/train/CONTINUE_00667
6003 ALMOST/train/ALMOST_00538
6003 ACTUALLY/train/ACTUALLY_00821
6003 SINCE/train/SINCE_00761
6003 MIGHT/train/MIGHT_00412
6003 BEING/train/BEING_00321
6003 GIVEN/train/GIVEN_00532
6003 TOMORROW/train/TOMORROW_00417
6003 MILLIONS/train/MILLIONS_00916
6003 KNOWN/train/KNOWN_00661
6003 PARENTS/train/PARENTS_00113
6003 BLACK/train/BLACK_00486
6003 COUNTRY/train/COUNTRY_00073
6003 BUDGET/train/BUDGET_00517
6003 LEAVE/train/LEAVE_00383
6003 BRITISH/train/BRITISH_00586
6003 STREET/train/STREET_00831
6003 CONTINUE/train/CONTINUE_00747
6003 MEMBERS/train/MEMBERS_00529
6003 BLACK/train/BLACK_00742
6003 BETTER/train/BETTER_00773
6003 PRETTY/train/PRETTY_00455
6003 HISTORY/train/HISTORY_00018
6003 AFTER/train/AFTER_00683
6003 FORMER/train/FORMER_00812
6003 ALREADY/train/ALREADY_00893
6003 SEEMS/train/SEEMS_00381
6003 EXPECT/train/EXPECT_00167
6003 MISSING/train/MISSING_00725
6003 EXPECT/train/EXPECT_00158
6003 SERVICES/train/SERVICES_00198
6003 HOUSING/train/HOUSING_00015
6003 LITTLE/train/LITTLE_00786
6003 SYRIA/train/SYRIA_00291
6003 CHILDREN/train/CHILDREN_00158
6003 MINISTER/train/MINISTER_00440
6003 GROUND/train/GROUND_00947
6003 RATHER/train/RATHER_00506
6003 ENOUGH/train/ENOUGH_00833
6003 UNITED/train/UNITED_00177
6003 EVERYTHING/train/EVERYTHING_00754
6003 PRICE/train/PRICE_00897
6003 TAKEN/train/TAKEN_00741
6003 ATTACK/train/ATTACK_00112
6003 LITTLE/train/LITTLE_00913
6003 BROUGHT/train/BROUGHT_00788
6003 SPEND/train/SPEND_00352
6003 GIVEN/train/GIVEN_00343
6003 AMONG/train/AMONG_00816
6003 USING/train/USING_00245
6003 CONTINUE/train/CONTINUE_00394
6003 FORMER/train/FORMER_00526
6003 BRING/train/BRING_00515
6003 EUROPEAN/train/EUROPEAN_00749
6003 LEAST/train/LEAST_00858
6003 TOMORROW/train/TOMORROW_00823
6003 SENSE/train/SENSE_00295
6003 WARNING/train/WARNING_00157
6003 SCHOOLS/train/SCHOOLS_00978
6003 VIOLENCE/train/VIOLENCE_00349
6003 THEMSELVES/train/THEMSELVES_00609
6003 BETWEEN/train/BETWEEN_00635
6003 STAFF/train/STAFF_00020
6003 WHETHER/train/WHETHER_00038
6003 WORST/train/WORST_00409
6003 REPORTS/train/REPORTS_00087
6003 PROTECT/train/PROTECT_00475
6003 ABUSE/train/ABUSE_00460
6003 WITHOUT/train/WITHOUT_00215
6003 PERSON/train/PERSON_00486
6003 MOVING/train/MOVING_00832
6003 AMERICAN/train/AMERICAN_00810
6003 MINISTERS/train/MINISTERS_00316
6003 MILLIONS/train/MILLIONS_00679
6003 FORMER/train/FORMER_00168
6003 DOING/train/DOING_00069
6003 ACCUSED/train/ACCUSED_00758
6003 AFRICA/train/AFRICA_00619
6003 WHILE/train/WHILE_00387
6003 LEAVE/train/LEAVE_00408
6003 FIRST/train/FIRST_00531
6003 LONDON/train/LONDON_00944
6003 SPEECH/train/SPEECH_00837
6003 MAJORITY/train/MAJORITY_00823
6003 QUITE/train/QUITE_00214
6003 SERIOUS/train/SERIOUS_00029
6003 STATES/train/STATES_00452
6003 BIGGEST/train/BIGGEST_00483
6003 TALKING/train/TALKING_00473
6003 RIGHTS/train/RIGHTS_00784
6003 THOUSANDS/train/THOUSANDS_00270
6003 EDUCATION/train/EDUCATION_00806
6003 WANTS/train/WANTS_00593
6003 GROWTH/train/GROWTH_00570
6003 COUNTRY/train/COUNTRY_00853
6003 SINCE/train/SINCE_00823
6003 WITHOUT/train/WITHOUT_00110
6003 AHEAD/train/AHEAD_00652
6003 GENERAL/train/GENERAL_00916
6003 COUNTRY/train/COUNTRY_00601
6003 THREAT/train/THREAT_00316
6003 STRONG/train/STRONG_00377
6003 MATTER/train/MATTER_00301
6003 PLANS/train/PLANS_00651
6003 AMONG/train/AMONG_00512
6003 PUBLIC/train/PUBLIC_00709
6003 STARTED/train/STARTED_00820
6003 GIVEN/train/GIVEN_00373
6003 WATER/train/WATER_00299
6003 SECRETARY/train/SECRETARY_00184
6003 CONFERENCE/train/CONFERENCE_00644
6003 COUPLE/train/COUPLE_00084
6003 PERSON/train/PERSON_00283
6003 WORST/train/WORST_00388
6003 SYRIAN/train/SYRIAN_00851
6003 THERE/train/THERE_00548
6003 NEVER/train/NEVER_00125
6003 BECAUSE/train/BECAUSE_00515
6003 MONEY/train/MONEY_00910
6003 SOCIETY/train/SOCIETY_00853
6003 DOING/train/DOING_00822
6003 ARRESTED/train/ARRESTED_00104
6003 SOMETHING/train/SOMETHING_00614
6003 STATES/train/STATES_00392
6003 REFERENDUM/train/REFERENDUM_00826
6003 MEMBERS/train/MEMBERS_00908
6003 SCOTLAND/train/SCOTLAND_00612
6003 EVENTS/train/EVENTS_00238
6003 TALKING/train/TALKING_00898
6003 COUPLE/train/COUPLE_00824
6003 WATER/train/WATER_00737
6003 OTHERS/train/OTHERS_00688
6003 UNTIL/train/UNTIL_00714
6003 STATES/train/STATES_00272
6003 ALWAYS/train/ALWAYS_00630
6003 PARTY/train/PARTY_00954
6003 CONFERENCE/train/CONFERENCE_00499
6003 CRIME/train/CRIME_00835
6003 TONIGHT/train/TONIGHT_00214
6003 MIDDLE/train/MIDDLE_00225
6003 TAKEN/train/TAKEN_00737
6003 STATES/train/STATES_00325
6003 KILLED/train/KILLED_00066
6003 KNOWN/train/KNOWN_00583
6003 NEEDS/train/NEEDS_00730
6003 PROCESS/train/PROCESS_00834
6003 BUILDING/train/BUILDING_00825
6003 EVENTS/train/EVENTS_00154
6003 ISSUE/train/ISSUE_00868
6003 MASSIVE/train/MASSIVE_00055
6003 CERTAINLY/train/CERTAINLY_00661
6003 NOTHING/train/NOTHING_00302
6003 MILLIONS/train/MILLIONS_00873
6003 DEATH/train/DEATH_00453
6003 PERSONAL/train/PERSONAL_00287
6003 FRONT/train/FRONT_00042
6003 MILITARY/train/MILITARY_00508
6003 HIGHER/train/HIGHER_00122
6003 VIOLENCE/train/VIOLENCE_00785
6003 RUNNING/train/RUNNING_00956
6003 SENIOR/train/SENIOR_00529
6003 HAPPENED/train/HAPPENED_00394
6003 COMPANY/train/COMPANY_00879
6003 COURSE/train/COURSE_00373
6003 FACING/train/FACING_00638
6003 MISSING/train/MISSING_00802
6003 HUMAN/train/HUMAN_00633
6003 GEORGE/train/GEORGE_00262
6003 MEMBERS/train/MEMBERS_00365
6003 MIGHT/train/MIGHT_00541
6003 CRIME/train/CRIME_00367
6003 EVIDENCE/train/EVIDENCE_00957
6003 DEBATE/train/DEBATE_00488
6003 EDUCATION/train/EDUCATION_00510
6003 LEADERSHIP/train/LEADERSHIP_00773
6003 REFERENDUM/train/REFERENDUM_00053
6003 ELECTION/train/ELECTION_00364
6003 FRONT/train/FRONT_00772
6003 EVIDENCE/train/EVIDENCE_00816
6003 PRICES/train/PRICES_00357
6003 CHINA/train/CHINA_00316
6003 DAVID/train/DAVID_00452
6003 RATHER/train/RATHER_00344
6003 GENERAL/train/GENERAL_00379
6003 ENOUGH/train/ENOUGH_00398
6003 PRISON/train/PRISON_00635
6003 WRONG/train/WRONG_00993
6003 DECIDED/train/DECIDED_00346
6003 RUSSIAN/train/RUSSIAN_00494
6003 SYRIA/train/SYRIA_00524
6003 LIVES/train/LIVES_00179
6003 KNOWN/train/KNOWN_00571
6003 CURRENT/train/CURRENT_00705
6003 ANOTHER/train/ANOTHER_00284
6003 COUPLE/train/COUPLE_00628
6003 WATCHING/train/WATCHING_00119
6003 WEAPONS/train/WEAPONS_00641
6003 EDITOR/train/EDITOR_00727
6003 POWERS/train/POWERS_00613
6003 AMERICAN/train/AMERICAN_00192
6003 COUNCIL/train/COUNCIL_00444
6003 CAPITAL/train/CAPITAL_00161
6003 FOOTBALL/train/FOOTBALL_00741
6003 MIGHT/train/MIGHT_00258
6003 INSIDE/train/INSIDE_00839
6003 FOREIGN/train/FOREIGN_00757
6003 LATEST/train/LATEST_00939
6003 MILLION/train/MILLION_00099
6003 YOUNG/train/YOUNG_00093
6003 CHILD/train/CHILD_00551
6003 CERTAINLY/train/CERTAINLY_00538
6003 MAYBE/train/MAYBE_00386
6003 THERE/train/THERE_00576
6003 SERVICE/train/SERVICE_00078
6003 INTEREST/train/INTEREST_00018
6003 WORDS/train/WORDS_00243
6003 CLAIMS/train/CLAIMS_00712
6003 COURT/train/COURT_00379
6003 WITHOUT/train/WITHOUT_01000
6003 CONTINUE/train/CONTINUE_00193
6003 UNDERSTAND/train/UNDERSTAND_00826
6003 EUROPE/train/EUROPE_00319
6003 MASSIVE/train/MASSIVE_00266
6003 STATE/train/STATE_00193
6003 MONTHS/train/MONTHS_00030
6003 SYSTEM/train/SYSTEM_00389
6003 MAKING/train/MAKING_00190
6003 POSSIBLE/train/POSSIBLE_00464
6003 SOMETHING/train/SOMETHING_00019
6003 MINISTER/train/MINISTER_00070
6003 COMPANY/train/COMPANY_00135
6003 WANTED/train/WANTED_00947
6003 MURDER/train/MURDER_00196
6003 MEMBERS/train/MEMBERS_00297
6003 CLAIMS/train/CLAIMS_00068
6003 MILLION/train/MILLION_00941
6003 VIOLENCE/train/VIOLENCE_00966
6003 BUSINESSES/train/BUSINESSES_00759
6003 ASKING/train/ASKING_00308
6003 RATES/train/RATES_00434
6003 FAMILY/train/FAMILY_00958
6003 WHILE/train/WHILE_00341
6003 FOREIGN/train/FOREIGN_00199
6003 SYSTEM/train/SYSTEM_00305
6003 STAND/train/STAND_00487
6003 RESPONSE/train/RESPONSE_00442
6003 COUNTRY/train/COUNTRY_00886
6003 FAMILIES/train/FAMILIES_00248
6003 UNITED/train/UNITED_00409
6003 OBAMA/train/OBAMA_00896
6003 FOOTBALL/train/FOOTBALL_00413
6003 INTEREST/train/INTEREST_00090
6003 CURRENT/train/CURRENT_00531
6003 COMMUNITY/train/COMMUNITY_00165
6003 THOUSANDS/train/THOUSANDS_00767
6003 SENIOR/train/SENIOR_00073
6003 BETTER/train/BETTER_00038
6003 SEVEN/train/SEVEN_00260
6003 CLAIMS/train/CLAIMS_00653
6003 BETTER/train/BETTER_00097
6003 MEDIA/train/MEDIA_00284
6003 COUNTRY/train/COUNTRY_00207
6003 AMERICAN/train/AMERICAN_00023
6003 UNDER/train/UNDER_00102
6003 PLACES/train/PLACES_00798
6003 PRESS/train/PRESS_00427
6003 VICTIMS/train/VICTIMS_00423
6003 CURRENT/train/CURRENT_00730
6003 BILLION/train/BILLION_00845
6003 WOMEN/train/WOMEN_00632
6003 SOCIAL/train/SOCIAL_00778
6003 ITSELF/train/ITSELF_00785
6003 COUNTRY/train/COUNTRY_00930
6003 TONIGHT/train/TONIGHT_00925
6003 COUNCIL/train/COUNCIL_00999
6003 DEBATE/train/DEBATE_00985
6003 MINISTER/train/MINISTER_00995
6003 POLITICAL/train/POLITICAL_00272
6003 SOCIAL/train/SOCIAL_00503
6003 STRONG/train/STRONG_00266
6003 RATHER/train/RATHER_00197
6003 POLITICIANS/train/POLITICIANS_00554
6003 HUNDREDS/train/HUNDREDS_00784
6003 BILLION/train/BILLION_00006
6003 HISTORY/train/HISTORY_00572
6003 STATES/train/STATES_00304
6003 BORDER/train/BORDER_00603
6003 SINCE/train/SINCE_00146
6003 COURSE/train/COURSE_00383
6003 CONFERENCE/train/CONFERENCE_00007
6003 MINUTES/train/MINUTES_00229
6003 KNOWN/train/KNOWN_00248
6003 NORTHERN/train/NORTHERN_00968
6003 SEVEN/train/SEVEN_00943
6003 WHILE/train/WHILE_00855
6003 LEVELS/train/LEVELS_00043
6003 COULD/train/COULD_00968
6003 BEING/train/BEING_00836
6003 PUBLIC/train/PUBLIC_00873
6003 THREAT/train/THREAT_00196
6003 TAKEN/train/TAKEN_00398
6003 REPORT/train/REPORT_00244
6003 TRYING/train/TRYING_00878
6003 MOVING/train/MOVING_00121
6003 MEMBERS/train/MEMBERS_00454
6003 POLITICS/train/POLITICS_00877
6003 WARNING/train/WARNING_00261
6003 REPORT/train/REPORT_00190
6003 PLACES/train/PLACES_00327
6003 CLAIMS/train/CLAIMS_00274
6003 PUBLIC/train/PUBLIC_00622
6003 BUDGET/train/BUDGET_00509
6003 WEEKS/train/WEEKS_00618
6003 WOULD/train/WOULD_00608
6003 COURT/train/COURT_00821
6003 THING/train/THING_00038
6003 CAMERON/train/CAMERON_00746
6003 YESTERDAY/train/YESTERDAY_00208
6003 FIGHT/train/FIGHT_00406
6003 TALKING/train/TALKING_00642
6003 POSITION/train/POSITION_00866
6003 OTHER/train/OTHER_00378
6003 THINK/train/THINK_00608
6003 WHICH/train/WHICH_00852
6003 PRESSURE/train/PRESSURE_00313
6003 GROUND/train/GROUND_00022
6003 WOULD/train/WOULD_00482
6003 SOMEONE/train/SOMEONE_00179
6003 WELFARE/train/WELFARE_00863
6003 ISSUE/train/ISSUE_00613
6003 YOUNG/train/YOUNG_00907
6003 FRONT/train/FRONT_00571
6003 WRONG/train/WRONG_00734
6003 CAMERON/train/CAMERON_00768
6003 TRUST/train/TRUST_00112
6003 THEMSELVES/train/THEMSELVES_00012
6003 VIOLENCE/train/VIOLENCE_00789
6003 THOSE/train/THOSE_00989
6003 EVERYONE/train/EVERYONE_00819
6003 LABOUR/train/LABOUR_00376
6003 MILITARY/train/MILITARY_00411
6003 SEEMS/train/SEEMS_00659
6003 MEMBERS/train/MEMBERS_00453
6003 AGAINST/train/AGAINST_00268
6003 MINISTERS/train/MINISTERS_00203
6003 SCHOOL/train/SCHOOL_00535
6003 MONEY/train/MONEY_00283
6003 ALLOW/train/ALLOW_00232
6003 RULES/train/RULES_00303
6003 THERE/train/THERE_00570
6003 TOGETHER/train/TOGETHER_00017
6003 VIOLENCE/train/VIOLENCE_00946
6003 RIGHTS/train/RIGHTS_00979
6003 LIVING/train/LIVING_00089
6003 GIVING/train/GIVING_00014
6003 MIGHT/train/MIGHT_00327
6003 KILLED/train/KILLED_00720
6003 STREET/train/STREET_00260
6003 ANYTHING/train/ANYTHING_00735
6003 FIRST/train/FIRST_00012
6003 SENIOR/train/SENIOR_00079
6003 SCOTTISH/train/SCOTTISH_00727
6003 CHIEF/train/CHIEF_00349
6003 STORY/train/STORY_00044
6003 FIGHT/train/FIGHT_00467
6003 UNTIL/train/UNTIL_00592
6003 FRANCE/train/FRANCE_00833
6003 MAKES/train/MAKES_00863
6003 LEADERSHIP/train/LEADERSHIP_00547
6003 STREET/train/STREET_00179
6003 AMOUNT/train/AMOUNT_00019
6003 POLITICAL/train/POLITICAL_00354
6003 EDUCATION/train/EDUCATION_00626
6003 REPORTS/train/REPORTS_00691
6003 SCOTTISH/train/SCOTTISH_00619
6003 BENEFITS/train/BENEFITS_00118
6003 RUNNING/train/RUNNING_00670
6003 THOUSANDS/train/THOUSANDS_00495
6003 DAVID/train/DAVID_00365
6003 MAYBE/train/MAYBE_00637
6003 ASKING/train/ASKING_00613
6003 OTHERS/train/OTHERS_00764
6003 COMES/train/COMES_00385
6003 POINT/train/POINT_00834
6003 LONGER/train/LONGER_00526
6003 FRENCH/train/FRENCH_00113
6003 LONDON/train/LONDON_00036
6003 BEING/train/BEING_00879
6003 WHILE/train/WHILE_00441
6003 OFFICIALS/train/OFFICIALS_00707
6003 QUESTIONS/train/QUESTIONS_00274
6003 PRETTY/train/PRETTY_00779
6003 WANTS/train/WANTS_00540
6003 MAYBE/train/MAYBE_00377
6003 CRIME/train/CRIME_00152
6003 TONIGHT/train/TONIGHT_00061
6003 PAYING/train/PAYING_00195
6003 LONDON/train/LONDON_00153
6003 FRONT/train/FRONT_00244
6003 PAYING/train/PAYING_00613
6003 OFFICIALS/train/OFFICIALS_00714
6003 WEAPONS/train/WEAPONS_00252
6003 FAMILY/train/FAMILY_00554
6003 WALES/train/WALES_00642
6003 CHANCE/train/CHANCE_00621
6003 ISLAMIC/train/ISLAMIC_00787
6003 JUSTICE/train/JUSTICE_00368
6003 TRADE/train/TRADE_00005
6003 MIDDLE/train/MIDDLE_00301
6003 WEAPONS/train/WEAPONS_00778
6003 MORNING/train/MORNING_00004
6003 PEOPLE/train/PEOPLE_00421
6003 TONIGHT/train/TONIGHT_00516
6003 MILLION/train/MILLION_00438
6003 MINUTES/train/MINUTES_00640
6003 GROWTH/train/GROWTH_00181
6003 OFFICE/train/OFFICE_00094
6003 THEIR/train/THEIR_00867
6003 EVERYONE/train/EVERYONE_00529
6003 PROBABLY/train/PROBABLY_00730
6003 ANSWER/train/ANSWER_00464
6003 AGREEMENT/train/AGREEMENT_00846
6003 ACCUSED/train/ACCUSED_00166
6003 MOVING/train/MOVING_00293
6003 WEEKS/train/WEEKS_00591
6003 PROTECT/train/PROTECT_00538
6003 ALLOWED/train/ALLOWED_00703
6003 STAND/train/STAND_00702
6003 CHARGES/train/CHARGES_00825
6003 HUNDREDS/train/HUNDREDS_00145
6003 POLITICAL/train/POLITICAL_00733
6003 LITTLE/train/LITTLE_00666
6003 TRYING/train/TRYING_00800
6003 CALLED/train/CALLED_00779
6003 EVERYONE/train/EVERYONE_00668
6003 BIGGEST/train/BIGGEST_00898
6003 WOULD/train/WOULD_00351
6003 PLACE/train/PLACE_00394
6003 ARRESTED/train/ARRESTED_00238
6003 RESPONSE/train/RESPONSE_00343
6003 TRADE/train/TRADE_00762
6003 AGAINST/train/AGAINST_00384
6003 MOMENT/train/MOMENT_00120
6003 COUPLE/train/COUPLE_00050
6003 ANYTHING/train/ANYTHING_00138
6003 INQUIRY/train/INQUIRY_00333
6003 POSSIBLE/train/POSSIBLE_00378
6003 WHOLE/train/WHOLE_00690
6003 COURSE/train/COURSE_00690
6003 CONFLICT/train/CONFLICT_00712
6003 LONGER/train/LONGER_00529
6003 SECRETARY/train/SECRETARY_00038
6003 THOUGHT/train/THOUGHT_00525
6003 HISTORY/train/HISTORY_00935
6003 AGREEMENT/train/AGREEMENT_00118
6003 SHORT/train/SHORT_00816
6003 SOCIETY/train/SOCIETY_00537
6003 PARTY/train/PARTY_00117
6003 LEVELS/train/LEVELS_00151
6003 POSSIBLE/train/POSSIBLE_00310
6003 MEASURES/train/MEASURES_00463
6003 MINISTERS/train/MINISTERS_00997
6003 HAPPENING/train/HAPPENING_00835
6003 ALMOST/train/ALMOST_00863
6003 SEVEN/train/SEVEN_00931
6003 ANOTHER/train/ANOTHER_00110
6003 SYRIAN/train/SYRIAN_00457
6003 WORDS/train/WORDS_00812
6003 WITHOUT/train/WITHOUT_00931
6003 ALMOST/train/ALMOST_00697
6003 PRESS/train/PRESS_00523
6003 TRYING/train/TRYING_00654
6003 PROCESS/train/PROCESS_00621
6003 MAKING/train/MAKING_00124
6003 THOUGHT/train/THOUGHT_00451
6003 GREAT/train/GREAT_00562
6003 RESPONSE/train/RESPONSE_00647
6003 BRITISH/train/BRITISH_00662
6003 EVERYTHING/train/EVERYTHING_00620
6003 JUSTICE/train/JUSTICE_00764
6003 THREAT/train/THREAT_00308
6003 THEMSELVES/train/THEMSELVES_00084
6003 WESTERN/train/WESTERN_00052
6003 EXPECT/train/EXPECT_00726
6003 HOUSE/train/HOUSE_00764
6003 BUDGET/train/BUDGET_00931
6003 HOURS/train/HOURS_00968
6003 TONIGHT/train/TONIGHT_00840
6003 FOUND/train/FOUND_00347
6003 PARTIES/train/PARTIES_00389
6003 ATTACK/train/ATTACK_00607
6003 MARKET/train/MARKET_00584
6003 TONIGHT/train/TONIGHT_00344
6003 BENEFIT/train/BENEFIT_00884
6003 OBAMA/train/OBAMA_00081
6003 MARKET/train/MARKET_00358
6003 HOUSING/train/HOUSING_00422
6003 RATHER/train/RATHER_00442
6003 SEEMS/train/SEEMS_00416
6003 MATTER/train/MATTER_00530
6003 BUSINESSES/train/BUSINESSES_00666
6003 MIDDLE/train/MIDDLE_00769
6003 INSIDE/train/INSIDE_00802
6003 NUMBERS/train/NUMBERS_00917
6003 CHANCE/train/CHANCE_00331
6003 PARTIES/train/PARTIES_00370
6003 HAPPENING/train/HAPPENING_00416
6003 CHANGES/train/CHANGES_00743
6003 LIVING/train/LIVING_00237
6003 CUSTOMERS/train/CUSTOMERS_00444
6003 NOTHING/train/NOTHING_00730
6003 WOMEN/train/WOMEN_00624
6003 WHILE/train/WHILE_00014
6003 FINAL/train/FINAL_00347
6003 SYRIAN/train/SYRIAN_00594
6003 THINGS/train/THINGS_00606
6003 REASON/train/REASON_00522
6003 FORMER/train/FORMER_00623
6003 NOTHING/train/NOTHING_00117
6003 AGAINST/train/AGAINST_00150
6003 LIVES/train/LIVES_00364
6003 MIGHT/train/MIGHT_00009
6003 SPECIAL/train/SPECIAL_00270
6003 FOUND/train/FOUND_00901
6003 AMERICAN/train/AMERICAN_00924
6003 SEEMS/train/SEEMS_00749
6003 SHORT/train/SHORT_00025
6003 TODAY/train/TODAY_00830
6003 THEMSELVES/train/THEMSELVES_00580
6003 MOMENT/train/MOMENT_00878
6003 OFTEN/train/OFTEN_00150
6003 EDUCATION/train/EDUCATION_00179
6003 SOMEONE/train/SOMEONE_00886
6003 ENGLAND/train/ENGLAND_00203
6003 MEMBER/train/MEMBER_00541
6003 MIGRANTS/train/MIGRANTS_00089
6003 TRUST/train/TRUST_00513
6003 BANKS/train/BANKS_00165
6003 LIVES/train/LIVES_00322
6003 STATEMENT/train/STATEMENT_00668
6003 MONEY/train/MONEY_00800
6003 QUESTION/train/QUESTION_00787
6003 UNDERSTAND/train/UNDERSTAND_00610
6003 GREAT/train/GREAT_00569
6003 EXAMPLE/train/EXAMPLE_00960
6003 ENOUGH/train/ENOUGH_00255
6003 NUMBERS/train/NUMBERS_00686
6003 LONDON/train/LONDON_00147
6003 ASKED/train/ASKED_00899
6003 PRIME/train/PRIME_00872
6003 AHEAD/train/AHEAD_00213
6003 SERIOUS/train/SERIOUS_00438
6003 ATTACKS/train/ATTACKS_00032
6003 FOUND/train/FOUND_00612
6003 STATES/train/STATES_00899
6003 DEBATE/train/DEBATE_00031
6003 WHICH/train/WHICH_00258
6003 SYRIAN/train/SYRIAN_00767
6003 COMPANY/train/COMPANY_00190
6003 BUILDING/train/BUILDING_00896
6003 SEEMS/train/SEEMS_00440
6003 MILITARY/train/MILITARY_00381
6003 AGAINST/train/AGAINST_00137
6003 WANTS/train/WANTS_00035
6003 QUESTION/train/QUESTION_00084
6003 RIGHTS/train/RIGHTS_00121
6003 VICTIMS/train/VICTIMS_00510
6003 PARTY/train/PARTY_00990
6003 THINGS/train/THINGS_00965
6003 BEHIND/train/BEHIND_00710
6003 TALKING/train/TALKING_00294
6003 PARTIES/train/PARTIES_00260
6003 FORCES/train/FORCES_00759
6003 ACCESS/train/ACCESS_00188
6003 NOTHING/train/NOTHING_00499
6003 LATER/train/LATER_00382
6003 AMONG/train/AMONG_00452
6003 WARNING/train/WARNING_00052
6003 BETWEEN/train/BETWEEN_00611
6003 HOUSE/train/HOUSE_00705
6003 DOING/train/DOING_00627
6003 VIOLENCE/train/VIOLENCE_00808
6003 MIGHT/train/MIGHT_00279
6003 SAYING/train/SAYING_00066
6003 HAPPEN/train/HAPPEN_00726
6003 GLOBAL/train/GLOBAL_00932
6003 QUESTION/train/QUESTION_00042
6003 SHORT/train/SHORT_00729
6003 HOSPITAL/train/HOSPITAL_00014
6003 VIOLENCE/train/VIOLENCE_00758
6003 VIOLENCE/train/VIOLENCE_00208
6003 CONSERVATIVE/train/CONSERVATIVE_00179
6003 DESPITE/train/DESPITE_00347
6003 GIVING/train/GIVING_00837
6003 LEAST/train/LEAST_00218
6003 CENTRAL/train/CENTRAL_00110
6003 WORDS/train/WORDS_00386
6003 BIGGEST/train/BIGGEST_00592
6003 LEADERSHIP/train/LEADERSHIP_00646
6003 FIGHTING/train/FIGHTING_00843
6003 MINISTER/train/MINISTER_00698
6003 BECAUSE/train/BECAUSE_00013
6003 RATHER/train/RATHER_00538
6003 WHILE/train/WHILE_00125
6003 WHETHER/train/WHETHER_00929
6003 POLICY/train/POLICY_00754
6003 OFTEN/train/OFTEN_00940
6003 MAKES/train/MAKES_00812
6003 DECISION/train/DECISION_00022
6003 STORY/train/STORY_00629
6003 MATTER/train/MATTER_00332
6003 HOUSE/train/HOUSE_00467
6003 PROTECT/train/PROTECT_00080
6003 SOMEONE/train/SOMEONE_00691
6003 EMERGENCY/train/EMERGENCY_00570
6003 PHONE/train/PHONE_00347
6003 HEALTH/train/HEALTH_00725
6003 BLACK/train/BLACK_00622
6003 PERSON/train/PERSON_00030
6003 PROVIDE/train/PROVIDE_00765
6003 GENERAL/train/GENERAL_00397
6003 WHETHER/train/WHETHER_00880
6003 SINCE/train/SINCE_00619
6003 TRYING/train/TRYING_00855
6003 CENTRAL/train/CENTRAL_00436
6003 NUMBERS/train/NUMBERS_00884
6003 SOUTH/train/SOUTH_00537
6003 SPECIAL/train/SPECIAL_00127
6003 IMPACT/train/IMPACT_00070
6003 MILLIONS/train/MILLIONS_00213
6003 POLITICAL/train/POLITICAL_00201
7184 LEAVE/train/LEAVE_00947
7184 WELCOME/train/WELCOME_00714
7184 WITHOUT/val/WITHOUT_00029
7184 POSSIBLE/test/POSSIBLE_00038
7184 MISSING/train/MISSING_00653
7184 CONTROL/train/CONTROL_00616
7184 OTHERS/train/OTHERS_00188
7184 MURDER/train/MURDER_00047
7184 CHILDREN/train/CHILDREN_00565
7184 NIGHT/train/NIGHT_00981
7184 OFFICIALS/train/OFFICIALS_00466
7184 ASKED/test/ASKED_00037
7184 EXPECTED/train/EXPECTED_00473
7184 FOLLOWING/val/FOLLOWING_00020
7184 SPEAKING/train/SPEAKING_00025
7184 LIKELY/train/LIKELY_00819
7184 EMERGENCY/train/EMERGENCY_00425
7184 DETAILS/train/DETAILS_00759
7184 LEADERSHIP/val/LEADERSHIP_00005
7184 WORKERS/train/WORKERS_00718
7184 NORTHERN/val/NORTHERN_00031
7184 AHEAD/test/AHEAD_00023
7184 WEATHER/train/WEATHER_00002
7184 THREAT/train/THREAT_00014
7184 CLAIMS/test/CLAIMS_00041
7184 BENEFIT/train/BENEFIT_00296
7184 YOUNG/train/YOUNG_00798
7184 ISLAMIC/train/ISLAMIC_00608
7184 AFFAIRS/train/AFFAIRS_00062
7184 PUBLIC/train/PUBLIC_00788
7184 STATES/train/STATES_00970
7184 PROVIDE/test/PROVIDE_00037
7184 AGAINST/train/AGAINST_00660
7184 GROWTH/train/GROWTH_00617
7184 AMERICA/train/AMERICA_00149
7184 BUILD/train/BUILD_00069
7184 RESULT/train/RESULT_00601
7184 LEVELS/train/LEVELS_00317
7184 EXPECT/train/EXPECT_00536
7184 CANCER/train/CANCER_00710
7184 CLAIMS/train/CLAIMS_00186
7184 UNTIL/test/UNTIL_00027
7184 CHARGES/train/CHARGES_00301
7184 LEVEL/train/LEVEL_00409
7184 MISSING/train/MISSING_00546
7184 GETTING/train/GETTING_00280
7184 NATIONAL/train/NATIONAL_00713
7184 ISLAMIC/val/ISLAMIC_00008
7184 PLACE/train/PLACE_00977
7184 OTHERS/train/OTHERS_00219
7184 SPEAKING/train/SPEAKING_00931
7184 AFFECTED/train/AFFECTED_00595
7184 TOMORROW/train/TOMORROW_00597
7184 POWER/val/POWER_00047
7184 WITHOUT/test/WITHOUT_00023
7184 MIGRANTS/train/MIGRANTS_00543
7184 WORST/test/WORST_00025
7184 LIVES/train/LIVES_00605
7184 REPORTS/train/REPORTS_00297
7184 WALES/train/WALES_00023
7184 BUDGET/train/BUDGET_00264
7184 ENGLAND/train/ENGLAND_00708
7184 ACCORDING/train/ACCORDING_00734
7184 CLOSE/train/CLOSE_00835
7184 HAPPENED/train/HAPPENED_00088
7184 LONDON/train/LONDON_00569
7184 HAVING/train/HAVING_00666
7184 VIOLENCE/train/VIOLENCE_00877
7184 MORNING/train/MORNING_00102
7184 UNITED/train/UNITED_00881
7184 PHONE/train/PHONE_00823
7184 HOMES/train/HOMES_00288
7184 LEADERS/train/LEADERS_00995
7184 BILLION/train/BILLION_00836
7184 TODAY/train/TODAY_00678
7184 COMPANY/train/COMPANY_00624
7184 ISLAMIC/train/ISLAMIC_00285
7184 AMONG/test/AMONG_00028
7184 SENSE/val/SENSE_00003
7184 TAKEN/train/TAKEN_00698
7184 LATEST/train/LATEST_00511
7184 NUMBER/train/NUMBER_00886
7184 MINISTER/val/MINISTER_00001
7184 ATTACK/test/ATTACK_00048
7184 WORDS/val/WORDS_00015
7184 CHILDREN/train/CHILDREN_00053
7184 LOCAL/test/LOCAL_00026
7184 UNION/train/UNION_00664
7184 FIRST/train/FIRST_00940
7184 CLOSE/val/CLOSE_00044
7184 UNION/train/UNION_00649
7184 JAMES/train/JAMES_00777
7184 LARGE/train/LARGE_00273
7184 MEMBERS/test/MEMBERS_00045
7184 GUILTY/train/GUILTY_00406
7184 GETTING/test/GETTING_00038
7184 UNION/test/UNION_00021
7184 PROVIDE/train/PROVIDE_00112
7184 RULES/train/RULES_00173
7184 RECENT/train/RECENT_00552
7184 EXPECTED/train/EXPECTED_00126
7184 ANNOUNCED/train/ANNOUNCED_00426
7184 PHONE/train/PHONE_00982
7184 REPORT/train/REPORT_00834
7184 LEAVE/train/LEAVE_00742
7184 ISLAMIC/train/ISLAMIC_00190
7184 AMONG/val/AMONG_00046
7184 PUBLIC/train/PUBLIC_00705
7184 USING/train/USING_00844
7184 STORY/train/STORY_00874
7184 MIGRANTS/val/MIGRANTS_00037
7184 LONGER/train/LONGER_00611
7184 STORY/train/STORY_00107
7184 SCHOOLS/test/SCHOOLS_00050
7184 MONTHS/train/MONTHS_00370
7184 UNTIL/train/UNTIL_00457
7184 WARNING/train/WARNING_00254
7184 AMERICAN/train/AMERICAN_00659
7184 SPEAKING/val/SPEAKING_00002
7184 PATIENTS/val/PATIENTS_00047
7184 MISSING/train/MISSING_00133
7184 COULD/train/COULD_00192
7184 GROUND/val/GROUND_00028
7184 ENERGY/train/ENERGY_00657
7184 FACING/train/FACING_00015
7184 VICTIMS/train/VICTIMS_00973
7184 SEVEN/train/SEVEN_00571
7184 ANOTHER/train/ANOTHER_00956
7184 MIGRANTS/val/MIGRANTS_00029
7184 PARLIAMENT/train/PARLIAMENT_00333
7184 CANCER/val/CANCER_00042
7184 CANCER/train/CANCER_00479
7184 SOCIAL/train/SOCIAL_00149
7184 SECRETARY/train/SECRETARY_00395
7184 WALES/train/WALES_00105
7184 ANNOUNCED/train/ANNOUNCED_00815
7184 AHEAD/train/AHEAD_00283
7184 MINUTES/train/MINUTES_00375
7184 HAPPENING/train/HAPPENING_00307
7184 MAJORITY/val/MAJORITY_00024
7184 DAVID/train/DAVID_00819
7184 MEDIA/train/MEDIA_00149
7184 TIMES/train/TIMES_00185
7184 EVERY/train/EVERY_00167
7184 RULES/train/RULES_00819
7184 ENERGY/train/ENERGY_00082
7184 COUNCIL/train/COUNCIL_00803
7184 CRIME/train/CRIME_00460
7184 POTENTIAL/val/POTENTIAL_00049
7184 DESCRIBED/train/DESCRIBED_00280
7184 RESPONSE/train/RESPONSE_00930
7184 OPERATION/train/OPERATION_00324
7184 AFFECTED/train/AFFECTED_00295
7184 SEVERAL/train/SEVERAL_00286
7184 STATES/train/STATES_00024
7184 SPENDING/train/SPENDING_00124
7184 GIVING/train/GIVING_00934
7184 COURT/train/COURT_00120
7184 PLACES/train/PLACES_00785
7184 WEEKEND/test/WEEKEND_00012
7184 STAFF/train/STAFF_00750
7184 CASES/train/CASES_00900
7184 CHIEF/val/CHIEF_00025
7184 CALLED/train/CALLED_00801
7184 FRANCE/val/FRANCE_00019
7184 WARNING/val/WARNING_00049
7184 CAPITAL/train/CAPITAL_00222
7184 PROVIDE/test/PROVIDE_00027
7184 PRESSURE/train/PRESSURE_00871
7184 SERIOUS/train/SERIOUS_00888
7184 ASKED/train/ASKED_00295
7184 LATER/train/LATER_00010
7184 SCHOOL/train/SCHOOL_00078
7184 SENIOR/train/SENIOR_00313
7184 PROCESS/test/PROCESS_00049
7184 BILLION/train/BILLION_00227
7184 TAKING/train/TAKING_00101
7184 CHANGES/test/CHANGES_00038
7184 PATIENTS/test/PATIENTS_00036
7184 ANNOUNCED/test/ANNOUNCED_00017
7184 SCHOOLS/train/SCHOOLS_00150
7184 NUMBER/train/NUMBER_00884
7184 ACCORDING/train/ACCORDING_00300
7184 EXPECTED/train/EXPECTED_00737
7184 FIGHT/train/FIGHT_00460
7184 SERIOUS/train/SERIOUS_00581
7184 LARGE/train/LARGE_00490
7184 EARLY/train/EARLY_00405
7184 EARLY/val/EARLY_00042
7184 ACCUSED/train/ACCUSED_00399
7184 ACROSS/train/ACROSS_00724
7184 POWERS/train/POWERS_00714
7184 UNTIL/train/UNTIL_00772
7184 AFTER/train/AFTER_00388
7184 FORMER/train/FORMER_00076
7184 MORNING/train/MORNING_00351
7184 MISSING/train/MISSING_00712
7184 SERVICES/test/SERVICES_00021
7184 WESTERN/train/WESTERN_00042
7184 MEASURES/train/MEASURES_00608
7184 NORTHERN/train/NORTHERN_00123
7184 MORNING/train/MORNING_00437
7184 MISSING/train/MISSING_00525
7184 THOUGHT/train/THOUGHT_00463
7184 DECISION/train/DECISION_00796
7184 SCHOOL/train/SCHOOL_00451
7184 KNOWN/train/KNOWN_00729
7184 ENERGY/train/ENERGY_00836
7184 LEADER/train/LEADER_00571
7184 DECIDED/train/DECIDED_00525
7184 MAJORITY/train/MAJORITY_00186
7184 HEALTH/train/HEALTH_00101
7184 STORY/train/STORY_00113
7184 RECORD/train/RECORD_00894
7184 IRELAND/train/IRELAND_00039
7184 WARNING/train/WARNING_00600
7184 FIRST/train/FIRST_00044
7184 GOING/val/GOING_00026
7184 SENSE/val/SENSE_00027
7184 SERIES/train/SERIES_00388
7184 ENGLAND/train/ENGLAND_00878
7184 FORCES/test/FORCES_00020
7184 ALREADY/test/ALREADY_00041
7184 COMING/train/COMING_00544
7184 TALKS/train/TALKS_00759
7184 ALLEGATIONS/train/ALLEGATIONS_00143
7184 INQUIRY/train/INQUIRY_00110
7184 FRENCH/train/FRENCH_00157
7184 OFFICE/train/OFFICE_00972
7184 LEVELS/train/LEVELS_00327
7184 ELECTION/train/ELECTION_00445
7184 BEING/train/BEING_00573
7184 FOLLOWING/train/FOLLOWING_00281
7184 LIVING/train/LIVING_00342
7184 LEAST/train/LEAST_00540
7184 UNTIL/val/UNTIL_00048
7184 UNION/train/UNION_00864
7184 MANCHESTER/train/MANCHESTER_00144
7184 ANNOUNCED/train/ANNOUNCED_00069
7184 ENGLAND/train/ENGLAND_00725
7184 PRISON/val/PRISON_00003
7184 WOMEN/train/WOMEN_00406
7184 STAFF/train/STAFF_00040
7184 STORY/train/STORY_00004
7184 GUILTY/train/GUILTY_00751
7184 ALMOST/train/ALMOST_00968
7184 FOLLOWING/train/FOLLOWING_00046
7184 WANTS/test/WANTS_00016
7184 AFFAIRS/train/AFFAIRS_00748
7184 MINUTES/test/MINUTES_00034
7184 MASSIVE/val/MASSIVE_00042
7184 MILLIONS/train/MILLIONS_00386
7184 ACCESS/train/ACCESS_00831
7184 FIGHT/train/FIGHT_00228
7184 SECTOR/train/SECTOR_00859
7184 ACCORDING/train/ACCORDING_00450
7184 MOMENT/train/MOMENT_00752
7184 TALKS/train/TALKS_00638
7184 BILLION/train/BILLION_00881
7184 OFFICIALS/train/OFFICIALS_00561
7184 CHANCE/val/CHANCE_00044
7184 STATE/train/STATE_00727
7184 MINISTER/test/MINISTER_00041
7184 REPORTS/test/REPORTS_00003
7184 LATER/test/LATER_00050
7184 JUSTICE/train/JUSTICE_00021
7184 DIFFERENCE/train/DIFFERENCE_00415
7184 GLOBAL/train/GLOBAL_00725
7184 PARLIAMENT/val/PARLIAMENT_00004
7184 SEVERAL/train/SEVERAL_00408
7184 SUNDAY/train/SUNDAY_00730
7184 INQUIRY/train/INQUIRY_00832
7184 BENEFIT/train/BENEFIT_00593
7184 MORNING/train/MORNING_00682
7184 ALREADY/train/ALREADY_00420
7184 SEVERAL/train/SEVERAL_00521
7184 TODAY/train/TODAY_00264
7184 EMERGENCY/val/EMERGENCY_00036
7184 SCOTTISH/train/SCOTTISH_00452
7184 POWER/train/POWER_00617
7184 CHIEF/val/CHIEF_00042
7184 FINANCIAL/train/FINANCIAL_00951
7184 YEARS/train/YEARS_00717
7184 COULD/train/COULD_00829
7184 CHINA/train/CHINA_00522
7184 TOMORROW/train/TOMORROW_00896
7184 FAMILIES/test/FAMILIES_00028
7184 LATER/train/LATER_00465
7184 INSIDE/train/INSIDE_00764
7184 FOLLOWING/train/FOLLOWING_00063
7184 THEIR/test/THEIR_00027
7184 ACCORDING/train/ACCORDING_00337
7184 STREET/train/STREET_00973
7184 LEAST/train/LEAST_00963
7184 LEVELS/train/LEVELS_00306
7184 SPEND/train/SPEND_00116
7184 ACCORDING/train/ACCORDING_00191
7184 TRIAL/train/TRIAL_00442
7184 CLAIMS/train/CLAIMS_00489
7184 GAMES/val/GAMES_00015
7184 KNOWN/train/KNOWN_00239
7184 ACCORDING/train/ACCORDING_00740
7184 OFFICERS/test/OFFICERS_00028
7184 EDITOR/train/EDITOR_00140
7184 RECORD/train/RECORD_00870
7184 DURING/val/DURING_00019
7184 COUNCIL/train/COUNCIL_00383
7184 CRISIS/train/CRISIS_00550
7184 ACCUSED/train/ACCUSED_00311
7184 SAYING/train/SAYING_00136
7184 EARLY/train/EARLY_00117
7184 HEALTH/test/HEALTH_00014
7184 JAMES/train/JAMES_00356
7184 GROUP/val/GROUP_00028
7184 INDEPENDENT/train/INDEPENDENT_00358
7184 BUSINESSES/train/BUSINESSES_00281
7184 FOUND/train/FOUND_00203
7184 QUESTIONS/train/QUESTIONS_00187
7184 NUMBERS/train/NUMBERS_00527
7184 WEATHER/train/WEATHER_00197
7184 COUNTRY/test/COUNTRY_00037
7184 AGAINST/train/AGAINST_00924
7184 BECOME/train/BECOME_00489
7184 MINISTERS/test/MINISTERS_00019
7184 WARNING/train/WARNING_00194
7184 OBAMA/val/OBAMA_00038
7184 BENEFIT/train/BENEFIT_00601
7184 MONEY/train/MONEY_00693
7184 LATEST/train/LATEST_00564
7184 POLICE/val/POLICE_00048
7184 GROUP/train/GROUP_00094
7184 BUSINESSES/train/BUSINESSES_00648
7184 ALMOST/val/ALMOST_00010
7184 HOUSING/train/HOUSING_00983
7184 PARENTS/train/PARENTS_00674
7184 CHALLENGE/val/CHALLENGE_00033
7184 WOMEN/train/WOMEN_00279
7184 DESPITE/train/DESPITE_00304
7184 PEOPLE/train/PEOPLE_00211
7184 LEADER/val/LEADER_00026
7184 INVOLVED/val/INVOLVED_00011
7184 OFFICIALS/train/OFFICIALS_00965
7184 MIGHT/train/MIGHT_00646
7184 WARNING/train/WARNING_00820
7184 PERSON/train/PERSON_00249
7184 ENGLAND/train/ENGLAND_00307
7184 FIGHT/train/FIGHT_00627
7184 SINGLE/val/SINGLE_00043
7184 WORLD/train/WORLD_00016
7184 PRESS/val/PRESS_00013
7184 HOURS/train/HOURS_00782
7184 DEATH/val/DEATH_00012
7184 EMERGENCY/train/EMERGENCY_00160
7184 SPECIAL/train/SPECIAL_00327
7184 FORCES/train/FORCES_00671
7184 PLACES/train/PLACES_00959
7184 MAKING/train/MAKING_00644
7184 LATEST/train/LATEST_00599
7184 ATTACK/train/ATTACK_00164
7184 ACCUSED/train/ACCUSED_00361
7184 LATER/train/LATER_00047
7184 NATIONAL/train/NATIONAL_00073
7184 LEAVE/train/LEAVE_00334
7184 CHINA/train/CHINA_00228
7184 ACCORDING/train/ACCORDING_00709
7184 EDUCATION/train/EDUCATION_00933
7184 THEIR/val/THEIR_00002
7184 BETWEEN/train/BETWEEN_00789
7184 JUSTICE/train/JUSTICE_00362
7184 INFORMATION/train/INFORMATION_00286
7184 FOLLOWING/train/FOLLOWING_00622
7184 PLANS/test/PLANS_00036
7184 LEADER/train/LEADER_00834
7184 RULES/train/RULES_00331
7184 HAVING/train/HAVING_00903
7184 PROBLEMS/train/PROBLEMS_00908
7184 PERIOD/test/PERIOD_00013
7184 WESTMINSTER/train/WESTMINSTER_00330
7184 DURING/val/DURING_00013
7184 MONTH/val/MONTH_00046
7184 NORTH/val/NORTH_00019
7184 TRYING/train/TRYING_00974
7184 WARNING/train/WARNING_00706
7184 LONGER/train/LONGER_00001
7184 GROWTH/val/GROWTH_00013
7184 BLACK/train/BLACK_00361
7184 ARRESTED/train/ARRESTED_00178
7184 MISSING/test/MISSING_00031
7184 SHOULD/train/SHOULD_00101
7184 MISSING/train/MISSING_00708
7184 RETURN/val/RETURN_00026
7184 ARRESTED/train/ARRESTED_00135
7184 GROWTH/val/GROWTH_00002
7184 SOCIAL/train/SOCIAL_00146
7184 RUNNING/train/RUNNING_00791
7184 BRITAIN/train/BRITAIN_00133
7184 EXACTLY/train/EXACTLY_00112
7184 PRESIDENT/train/PRESIDENT_00795
7184 AFFECTED/test/AFFECTED_00020
7184 ENGLAND/train/ENGLAND_00757
7184 EMERGENCY/train/EMERGENCY_00536
7184 HOMES/train/HOMES_00701
7184 HUNDREDS/val/HUNDREDS_00044
7184 FOUND/train/FOUND_00160
7184 INVESTMENT/train/INVESTMENT_00168
7184 STAFF/train/STAFF_00996
7184 LEADER/test/LEADER_00026
7184 EDUCATION/val/EDUCATION_00026
7184 ALLEGATIONS/train/ALLEGATIONS_00254
7184 FRIDAY/train/FRIDAY_00831
7184 AFFECTED/train/AFFECTED_00144
7184 EXPECTED/train/EXPECTED_00676
7184 HEART/test/HEART_00012
7184 FOOTBALL/train/FOOTBALL_00802
7184 GENERAL/train/GENERAL_00284
7184 PARENTS/train/PARENTS_00172
7184 SERVICE/train/SERVICE_00300
7184 BLACK/train/BLACK_00809
7184 INTEREST/train/INTEREST_00946
7184 EDUCATION/val/EDUCATION_00035
7184 SPECIAL/val/SPECIAL_00008
7184 CHARGES/train/CHARGES_00969
7184 LEADER/test/LEADER_00013
7184 BEFORE/train/BEFORE_00338
7184 SCOTTISH/train/SCOTTISH_00531
7184 AMERICA/train/AMERICA_00330
7184 HUNDREDS/train/HUNDREDS_00412
7184 MEDICAL/train/MEDICAL_00325
7184 COUPLE/train/COUPLE_00034
7184 SIDES/train/SIDES_00394
7184 EVERY/train/EVERY_00836
7184 SECRETARY/train/SECRETARY_00970
7184 FRIDAY/train/FRIDAY_00248
7184 KNOWN/train/KNOWN_00522
7184 MISSING/train/MISSING_00277
7184 WHILE/train/WHILE_00240
7184 BEFORE/train/BEFORE_00647
7184 BEFORE/train/BEFORE_00230
7184 INTEREST/train/INTEREST_00931
7184 SOCIAL/train/SOCIAL_00210
7184 LEADER/test/LEADER_00019
7184 BUILD/train/BUILD_00360
7184 CANCER/train/CANCER_00248
7184 PLANS/train/PLANS_00135
7184 VIOLENCE/test/VIOLENCE_00008
7184 AGREEMENT/test/AGREEMENT_00009
7184 GETTING/test/GETTING_00001
7184 SPECIAL/train/SPECIAL_00907
7184 SHORT/train/SHORT_00164
7184 IMPORTANT/train/IMPORTANT_00648
7184 LATER/test/LATER_00049
7184 EARLY/train/EARLY_00483
7184 GEORGE/train/GEORGE_00920
7184 ABUSE/train/ABUSE_00590
7184 STATES/train/STATES_00547
7184 BRITISH/train/BRITISH_00733
7184 ACCORDING/train/ACCORDING_00572
7184 MEDICAL/train/MEDICAL_00025
7184 IRELAND/train/IRELAND_00891
7184 CANCER/train/CANCER_00700
7184 ACCORDING/val/ACCORDING_00015
7184 CURRENT/val/CURRENT_00031
7184 MISSING/val/MISSING_00045
7184 AMONG/train/AMONG_00237
7184 EXACTLY/train/EXACTLY_00033
7184 SIDES/test/SIDES_00015
7184 FRONT/train/FRONT_00855
7184 FOUND/test/FOUND_00021
7184 PHONE/train/PHONE_00457
7184 TONIGHT/train/TONIGHT_00867
7184 TALKS/train/TALKS_00362
7184 WESTMINSTER/train/WESTMINSTER_00476
7184 MONEY/test/MONEY_00032
7184 ALLEGATIONS/test/ALLEGATIONS_00035
7184 CRISIS/train/CRISIS_00957
7184 PHONE/val/PHONE_00003
7184 BRING/train/BRING_00393
7184 MILITARY/train/MILITARY_00087
7184 ALREADY/test/ALREADY_00028
7184 THOUSANDS/train/THOUSANDS_00190
7184 RECORD/train/RECORD_00690
7184 FURTHER/val/FURTHER_00004
7184 OFFICIALS/train/OFFICIALS_00587
7184 DEATH/train/DEATH_00704
7184 AFTER/val/AFTER_00001
7184 MEMBERS/train/MEMBERS_00399
7184 INFORMATION/test/INFORMATION_00015
7184 ATTACK/train/ATTACK_00790
7184 STATES/train/STATES_00261
7184 TONIGHT/train/TONIGHT_00902
7184 ENGLAND/train/ENGLAND_00646
7184 DURING/train/DURING_00956
7184 LEVELS/val/LEVELS_00017
7184 FURTHER/train/FURTHER_00841
7184 INSIDE/train/INSIDE_00496
7184 KNOWN/val/KNOWN_00014
7184 SYRIA/test/SYRIA_00050
7184 BECOME/train/BECOME_00603
7184 ECONOMY/train/ECONOMY_00432
7184 GIVING/train/GIVING_00073
7184 SERVICE/train/SERVICE_00341
7184 WHILE/train/WHILE_00308
7184 MONTH/train/MONTH_00858
7184 HUNDREDS/train/HUNDREDS_00064
7184 FOREIGN/train/FOREIGN_00695
7184 DECIDED/train/DECIDED_00361
7184 LATER/val/LATER_00037
7184 WEATHER/train/WEATHER_00540
7184 GLOBAL/val/GLOBAL_00009
7184 THERE/val/THERE_00040
7184 INDEPENDENT/test/INDEPENDENT_00031
7184 FINANCIAL/train/FINANCIAL_00074
7184 WOMEN/train/WOMEN_00671
7184 SPENT/train/SPENT_00622
7184 PROBABLY/train/PROBABLY_00791
7184 EVENTS/val/EVENTS_00005
7184 SPECIAL/test/SPECIAL_00030
7184 SHOULD/train/SHOULD_00042
7184 BILLION/train/BILLION_00111
7184 THOUSANDS/val/THOUSANDS_00016
7184 TRADE/train/TRADE_00628
7184 CONTROL/train/CONTROL_00318
7184 WEEKEND/train/WEEKEND_00742
7184 NOTHING/train/NOTHING_00237
7184 SYRIA/train/SYRIA_00773
7184 WRONG/train/WRONG_00646
7184 WHETHER/test/WHETHER_00007
7184 OFFICERS/train/OFFICERS_00124
7184 BRING/train/BRING_00783
7184 RECENT/train/RECENT_00325
7184 MINUTES/train/MINUTES_00805
7184 GROWTH/test/GROWTH_00047
7184 VOTERS/train/VOTERS_00928
7184 RESULT/train/RESULT_00487
7184 FORCES/train/FORCES_00889
7184 WITHOUT/train/WITHOUT_00336
7184 EMERGENCY/train/EMERGENCY_00434
7184 MILLIONS/val/MILLIONS_00043
7184 SPEECH/train/SPEECH_00664
7184 SOUTHERN/train/SOUTHERN_00806
7184 WARNING/train/WARNING_00445
7184 CLEAR/test/CLEAR_00033
7184 FAMILIES/test/FAMILIES_00036
7184 BLACK/train/BLACK_00633
7184 ALMOST/test/ALMOST_00047
7184 LIKELY/train/LIKELY_00579
7184 SOCIETY/test/SOCIETY_00031
7184 PLACE/train/PLACE_00764
7184 MAKING/train/MAKING_00183
7184 BECAUSE/train/BECAUSE_00203
7184 ARRESTED/train/ARRESTED_00757
7184 YESTERDAY/train/YESTERDAY_00427
7184 ATTACK/train/ATTACK_00578
7184 MISSING/train/MISSING_00433
7184 SERIES/train/SERIES_00566
7184 RIGHTS/train/RIGHTS_00947
7184 GAMES/train/GAMES_00120
7184 WELFARE/train/WELFARE_00323
7184 SCHOOLS/val/SCHOOLS_00011
7184 TODAY/train/TODAY_00944
7184 HEALTH/train/HEALTH_00358
7184 SEVERAL/train/SEVERAL_00909
7184 ENOUGH/train/ENOUGH_00283
7184 ECONOMIC/val/ECONOMIC_00024
7184 ALMOST/val/ALMOST_00011
7184 OTHERS/train/OTHERS_00071
7184 DIFFERENT/train/DIFFERENT_00184
7184 ACTION/test/ACTION_00001
7184 BEING/test/BEING_00045
7184 ENERGY/train/ENERGY_00694
7184 MURDER/test/MURDER_00012
7184 MOVING/val/MOVING_00050
7184 HEALTH/train/HEALTH_00118
7184 CENTRAL/train/CENTRAL_00050
7184 PRIME/train/PRIME_00720
7184 PHONE/train/PHONE_00661
7184 KILLED/train/KILLED_00998
7184 ALLOW/train/ALLOW_00392
7184 FORMER/train/FORMER_00653
7184 BEING/train/BEING_00447
7184 SEVERAL/train/SEVERAL_00588
7184 UNTIL/train/UNTIL_00319
7184 EDITOR/train/EDITOR_00553
7184 CANCER/train/CANCER_00555
7184 HEART/train/HEART_00160
7184 LATEST/train/LATEST_00711
7184 PRESS/train/PRESS_00220
7184 STATE/val/STATE_00032
7184 COULD/test/COULD_00026
7184 FRENCH/train/FRENCH_00229
7184 ELECTION/train/ELECTION_00795
7184 ISSUES/val/ISSUES_00017
7184 USING/val/USING_00001
7184 BLACK/train/BLACK_00639
7184 WHETHER/train/WHETHER_00065
7184 PROVIDE/train/PROVIDE_00570
7184 COURT/train/COURT_00902
7184 SINGLE/train/SINGLE_00794
7184 MONTHS/train/MONTHS_00919
7184 IMPORTANT/test/IMPORTANT_00007
7184 MINISTERS/train/MINISTERS_00769
7184 OUTSIDE/train/OUTSIDE_00646
7184 MURDER/val/MURDER_00023
7184 LEADERSHIP/train/LEADERSHIP_00046
7184 PATIENTS/test/PATIENTS_00018
7184 PAYING/train/PAYING_00429
7184 WHILE/val/WHILE_00018
7184 SERIES/train/SERIES_00426
7184 DURING/test/DURING_00017
7184 OPERATION/train/OPERATION_00280
7184 PUBLIC/train/PUBLIC_00708
7184 SCHOOLS/train/SCHOOLS_00758
7184 AFFECTED/val/AFFECTED_00025
7184 RIGHT/val/RIGHT_00041
7184 MATTER/train/MATTER_00201
7184 SINCE/train/SINCE_00810
7184 SITUATION/train/SITUATION_00369
7184 TONIGHT/train/TONIGHT_00198
7184 GROUP/train/GROUP_00654
7184 MILITARY/val/MILITARY_00040
7184 AUTHORITIES/train/AUTHORITIES_01000
7184 FACING/val/FACING_00018
7184 GREECE/train/GREECE_00387
7184 LATEST/train/LATEST_00443
7184 ANNOUNCED/train/ANNOUNCED_00665
7184 ALREADY/train/ALREADY_00765
7184 DEGREES/train/DEGREES_00831
7184 MEDICAL/train/MEDICAL_00097
7184 MEDICAL/train/MEDICAL_00886
7184 BORDER/train/BORDER_00828
7184 REMEMBER/test/REMEMBER_00041
7184 THEMSELVES/train/THEMSELVES_00599
7184 LATEST/train/LATEST_00030
7184 KILLED/train/KILLED_00348
7184 TAKEN/train/TAKEN_00542
7184 ACCUSED/train/ACCUSED_00667
7184 PRISON/val/PRISON_00042
7184 PRISON/val/PRISON_00030
7184 MILLION/val/MILLION_00043
7184 AMERICA/train/AMERICA_00711
7184 WELCOME/train/WELCOME_00627
7184 WARNING/train/WARNING_00312
7184 CHILDREN/train/CHILDREN_00889
7184 SERVICE/test/SERVICE_00040
7184 SUNDAY/train/SUNDAY_00534
7184 HEALTH/train/HEALTH_00972
7184 SCOTLAND/val/SCOTLAND_00012
7184 GROWING/train/GROWING_00471
7184 INFORMATION/val/INFORMATION_00024
7184 HOMES/test/HOMES_00003
7184 SECURITY/train/SECURITY_00057
7184 CALLED/train/CALLED_00822
7184 INDUSTRY/train/INDUSTRY_00930
7184 CLAIMS/train/CLAIMS_00593
7184 HOUSING/train/HOUSING_00493
7184 THEIR/train/THEIR_00265
7184 CLOSE/train/CLOSE_00868
7184 RECENT/test/RECENT_00015
7184 CALLED/train/CALLED_00408
7184 NORTH/train/NORTH_00991
7184 EXTRA/train/EXTRA_00236
7184 JUSTICE/val/JUSTICE_00004
7184 INQUIRY/train/INQUIRY_00747
7184 HEALTH/train/HEALTH_00898
7184 DECIDED/val/DECIDED_00022
7184 LITTLE/val/LITTLE_00041
7184 UNION/val/UNION_00002
7184 MIGRANTS/train/MIGRANTS_00862
7184 WANTS/train/WANTS_00550
7184 SECOND/train/SECOND_00783
7184 SIMPLY/train/SIMPLY_00142
7184 ENERGY/train/ENERGY_00203
7184 CHARGE/train/CHARGE_00250
7184 SPEECH/test/SPEECH_00007
7184 PAYING/train/PAYING_00460
7184 WAITING/train/WAITING_00388
7184 SINCE/train/SINCE_00477
7184 INDEPENDENT/test/INDEPENDENT_00024
7184 SYSTEM/train/SYSTEM_00193
7184 WAITING/train/WAITING_00161
7184 PARLIAMENT/train/PARLIAMENT_00956
7184 LATER/train/LATER_00748
7184 EXPECT/train/EXPECT_00765
7184 SYRIAN/train/SYRIAN_00621
7184 GREECE/train/GREECE_00532
7184 FRENCH/train/FRENCH_00268
7184 CAMPAIGN/val/CAMPAIGN_00030
7184 ISLAMIC/val/ISLAMIC_00009
7184 GROWING/train/GROWING_00641
7184 KNOWN/train/KNOWN_00641
7184 AMERICA/train/AMERICA_00234
7184 ENOUGH/train/ENOUGH_00324
7184 ALMOST/train/ALMOST_00560
7184 EDUCATION/train/EDUCATION_00367
7184 CLAIMS/val/CLAIMS_00047
7184 MEASURES/train/MEASURES_00065
7184 JAMES/train/JAMES_00608
7184 DETAILS/train/DETAILS_00401
7184 SPEND/train/SPEND_00459
7184 POLITICAL/val/POLITICAL_00029
7184 PRESSURE/val/PRESSURE_00006
7184 BRITISH/val/BRITISH_00032
7184 CLAIMS/train/CLAIMS_00586
7184 STARTED/train/STARTED_00586
7184 VICTIMS/train/VICTIMS_00691
7184 WEATHER/test/WEATHER_00016
7184 MISSING/train/MISSING_00713
7184 YESTERDAY/train/YESTERDAY_00968
7184 PATIENTS/train/PATIENTS_00493
7184 BRING/val/BRING_00036
7184 FRENCH/train/FRENCH_00472
7184 ACROSS/test/ACROSS_00033
7184 REPORT/train/REPORT_00234
7184 ACCORDING/train/ACCORDING_00930
7184 SUPPORT/train/SUPPORT_00039
7184 LONGER/test/LONGER_00020
7184 UNDER/test/UNDER_00030
7184 YESTERDAY/train/YESTERDAY_00845
7184 YOUNG/train/YOUNG_00279
7184 THREE/train/THREE_00250
7184 ENGLAND/train/ENGLAND_00862
7184 CALLED/train/CALLED_00521
7184 DECIDED/train/DECIDED_00157
7184 SEVEN/train/SEVEN_00905
7184 IMPORTANT/val/IMPORTANT_00013
7184 LIKELY/train/LIKELY_00798
7184 COURT/train/COURT_00792
7184 COMPANY/train/COMPANY_00177
7184 SUNDAY/test/SUNDAY_00040
7184 BLACK/train/BLACK_00081
7184 LIVING/train/LIVING_00902
7184 FRENCH/train/FRENCH_00416
7184 SEEMS/train/SEEMS_00268
7184 COMPANIES/train/COMPANIES_00343
7184 MINUTES/train/MINUTES_00126
7184 GAMES/train/GAMES_00884
7184 GENERAL/val/GENERAL_00032
7184 SEVEN/test/SEVEN_00049
7184 MINUTES/train/MINUTES_00984
7184 CHIEF/train/CHIEF_00629
7184 DECIDED/train/DECIDED_00128
7184 DESPITE/train/DESPITE_00513
7184 SIDES/val/SIDES_00046
7184 SPEND/val/SPEND_00045
7184 PRICES/train/PRICES_00741
7184 WHICH/train/WHICH_00527
7184 FOREIGN/val/FOREIGN_00018
7184 POLICE/train/POLICE_00264
7184 CLEAR/val/CLEAR_00041
7184 GUILTY/train/GUILTY_00363
7184 NIGHT/train/NIGHT_00315
7184 OTHER/train/OTHER_00550
7184 THOSE/test/THOSE_00005
7184 EXPECTED/train/EXPECTED_00576
7184 BUDGET/train/BUDGET_00105
7184 POLICE/test/POLICE_00044
7184 AFRICA/train/AFRICA_00658
7184 LATEST/train/LATEST_00088
7184 BRITISH/train/BRITISH_00536
7184 MEMBERS/val/MEMBERS_00005
7184 STAFF/train/STAFF_00964
7184 CONTROL/train/CONTROL_00378
7184 MONTHS/train/MONTHS_00331
7184 ALLOWED/train/ALLOWED_00070
7184 BORDER/train/BORDER_00850
7184 FOLLOWING/train/FOLLOWING_00343
7184 WOULD/val/WOULD_00015
7184 WORKERS/train/WORKERS_00102
7184 SCHOOL/train/SCHOOL_00183
7184 LEADERS/train/LEADERS_00198
7184 MIGRANTS/train/MIGRANTS_00292
7184 POLITICIANS/train/POLITICIANS_00031
7184 TIMES/train/TIMES_00432
7184 EUROPE/train/EUROPE_00436
7184 MIDDLE/train/MIDDLE_00339
7184 MEASURES/train/MEASURES_00078
7184 EVERYTHING/train/EVERYTHING_00159
7184 SCHOOLS/train/SCHOOLS_00426
7184 ALLOWED/train/ALLOWED_00159
7184 AUTHORITIES/train/AUTHORITIES_00768
7184 OFFICIALS/train/OFFICIALS_00448
7184 TALKING/train/TALKING_00704
7184 REPORTS/train/REPORTS_00369
7184 DURING/train/DURING_00816
7184 NORTHERN/train/NORTHERN_00574
7184 REPORT/val/REPORT_00004
7184 SYRIA/train/SYRIA_00437
7184 CONTROL/train/CONTROL_00413
7184 LONGER/train/LONGER_00363
7184 RECENT/train/RECENT_00979
7184 MORNING/train/MORNING_00804
7184 WOMEN/train/WOMEN_00789
7184 SUPPORT/train/SUPPORT_00948
7184 MASSIVE/test/MASSIVE_00032
7184 ACCESS/train/ACCESS_00918
7184 INQUIRY/test/INQUIRY_00013
7184 YOUNG/train/YOUNG_00564
7184 WORST/test/WORST_00018
7184 MEMBERS/train/MEMBERS_00170
7184 THOUSANDS/test/THOUSANDS_00017
7184 POTENTIAL/val/POTENTIAL_00029
7184 CANCER/train/CANCER_00790
7184 DAVID/val/DAVID_00039
7184 GIVEN/train/GIVEN_00417
7184 POWER/train/POWER_00501
7184 BEFORE/train/BEFORE_00214
7184 NEVER/train/NEVER_00430
7184 WATER/train/WATER_00814
7184 GEORGE/test/GEORGE_00009
7184 YESTERDAY/train/YESTERDAY_00473
7184 FIRST/test/FIRST_00031
7184 SUNDAY/test/SUNDAY_00003
7184 INDEPENDENT/test/INDEPENDENT_00048
7184 WHILE/train/WHILE_00411
7184 MURDER/val/MURDER_00028
7184 ENERGY/train/ENERGY_00935
7184 DEATH/train/DEATH_00323
7184 ORDER/train/ORDER_00557
7184 CANCER/test/CANCER_00014
7184 STATE/train/STATE_00393
7184 AMONG/test/AMONG_00017
7184 STAFF/train/STAFF_00992
7184 DECISION/train/DECISION_00661
7184 MURDER/test/MURDER_00031
7184 SOUTH/train/SOUTH_00281
7184 REPORTS/train/REPORTS_00074
7184 ATTACK/train/ATTACK_00266
7184 FIGHT/val/FIGHT_00029
7184 SERVICE/train/SERVICE_00674
7184 AGREEMENT/train/AGREEMENT_00433
7184 CAPITAL/train/CAPITAL_00919
7184 CANCER/train/CANCER_00780
7184 ENERGY/train/ENERGY_00907
7184 CAMERON/train/CAMERON_00294
7184 WATER/train/WATER_00556
7184 LEVELS/test/LEVELS_00002
7184 RIGHT/val/RIGHT_00001
7184 ACCORDING/train/ACCORDING_00329
7184 SPENT/train/SPENT_00855
7184 MINISTERS/train/MINISTERS_00725
7184 CONFERENCE/train/CONFERENCE_00314
7184 GROWING/test/GROWING_00029
7184 COMPANY/train/COMPANY_00381
7184 PRICE/train/PRICE_00581
7184 TODAY/train/TODAY_00050
7184 SCHOOLS/train/SCHOOLS_00620
7184 RECENT/train/RECENT_00734
7184 KNOWN/train/KNOWN_00552
7184 DECISION/train/DECISION_00651
7184 ANOTHER/train/ANOTHER_00664
7184 IMMIGRATION/train/IMMIGRATION_00249
7184 ACCORDING/train/ACCORDING_00287
7184 MONTHS/train/MONTHS_00658
7184 INDUSTRY/train/INDUSTRY_00906
7184 FOREIGN/test/FOREIGN_00050
7184 BECOME/test/BECOME_00035
7184 OFFICE/train/OFFICE_00183
7184 PERIOD/train/PERIOD_00797
7184 THEMSELVES/train/THEMSELVES_00020
7184 DURING/train/DURING_00602
7184 OFFICIALS/train/OFFICIALS_00272
7184 DEATH/train/DEATH_00728
7184 PROTECT/train/PROTECT_00826
7184 CRIME/train/CRIME_00739
7184 ACCORDING/train/ACCORDING_00689
7184 SOCIETY/val/SOCIETY_00017
7184 REPORT/train/REPORT_00948
7184 HOMES/train/HOMES_00597
7184 MEETING/train/MEETING_00759
7184 BRING/train/BRING_00943
7184 REFERENDUM/train/REFERENDUM_00490
7184 LEVELS/train/LEVELS_00699
7184 CONTROL/train/CONTROL_00157
7184 ALMOST/train/ALMOST_00779
7184 CALLED/train/CALLED_00246
7184 TIMES/train/TIMES_00982
7184 REPORT/val/REPORT_00048
7184 OPERATION/val/OPERATION_00014
7184 LEAST/train/LEAST_00535
7184 ACCORDING/train/ACCORDING_00438
7184 WESTERN/train/WESTERN_00167
7184 PRISON/test/PRISON_00027
7184 DOING/train/DOING_00189
7184 FINANCIAL/train/FINANCIAL_00779
7184 MILLION/train/MILLION_00650
7184 WESTMINSTER/train/WESTMINSTER_00837
7184 TALKING/train/TALKING_00215
7184 ARRESTED/train/ARRESTED_00718
7184 MONTH/train/MONTH_00090
7184 MIGRANTS/train/MIGRANTS_00446
7184 AFFAIRS/train/AFFAIRS_00257
7184 STATE/val/STATE_00038
7184 LONGER/train/LONGER_00468
7184 ATTACK/train/ATTACK_00227
7184 ACTION/train/ACTION_00831
7184 HOUSING/test/HOUSING_00040
7184 AUTHORITIES/train/AUTHORITIES_00914
7184 WHERE/train/WHERE_00692
7184 COMMUNITY/train/COMMUNITY_00239
7184 TONIGHT/train/TONIGHT_00898
7184 SCOTTISH/train/SCOTTISH_00461
7184 UNDERSTAND/val/UNDERSTAND_00006
7184 ENGLAND/train/ENGLAND_00149
7184 INQUIRY/train/INQUIRY_00023
7184 GERMANY/train/GERMANY_00500
7184 ALMOST/train/ALMOST_00923
7184 BECOME/train/BECOME_00657
7184 WITHIN/train/WITHIN_00794
7184 HUNDREDS/train/HUNDREDS_00562
7184 WORST/test/WORST_00029
7184 PROTECT/test/PROTECT_00033
7184 MISSING/train/MISSING_00434
7184 RETURN/train/RETURN_00215
7184 CHALLENGE/train/CHALLENGE_00502
7184 STATE/train/STATE_00361
7184 MANCHESTER/test/MANCHESTER_00024
7184 WHOLE/train/WHOLE_00945
7184 INDUSTRY/train/INDUSTRY_00952
7184 DESCRIBED/train/DESCRIBED_00541
7184 CONSERVATIVE/train/CONSERVATIVE_00469
7184 WOMEN/val/WOMEN_00010
7184 LOCAL/train/LOCAL_00929
7184 ECONOMIC/train/ECONOMIC_00697
7184 AFRICA/train/AFRICA_00267
7184 GIVEN/test/GIVEN_00037
7184 RECORD/train/RECORD_00636
7184 MONTH/train/MONTH_00486
7184 NORTHERN/train/NORTHERN_00206
7184 TRADE/train/TRADE_00183
7184 WORLD/train/WORLD_00688
7184 ANNOUNCED/train/ANNOUNCED_00410
7184 TAKING/train/TAKING_00152
7184 LIVES/train/LIVES_00753
7184 CAPITAL/val/CAPITAL_00035
7184 NEVER/train/NEVER_00631
7184 WATER/train/WATER_00171
7184 INFLATION/train/INFLATION_00360
7184 OTHERS/train/OTHERS_00606
7184 MINUTES/train/MINUTES_00192
7184 ARRESTED/train/ARRESTED_00899
7184 FIRST/train/FIRST_00652
7184 MEETING/train/MEETING_00806
7184 EVENING/train/EVENING_00428
7184 DETAILS/train/DETAILS_00463
7184 THREE/train/THREE_00166
7184 SERVICES/train/SERVICES_00766
7184 MEDICAL/test/MEDICAL_00022
7184 LONDON/train/LONDON_00325
7184 SPENT/train/SPENT_00360
7184 MINUTES/train/MINUTES_00566
7184 NUMBER/train/NUMBER_00004
7184 RUSSIAN/train/RUSSIAN_00999
7184 EVENTS/train/EVENTS_00824
7184 SPENT/train/SPENT_00085
7184 REPORTS/train/REPORTS_00036
7184 MILLIONS/train/MILLIONS_00613
7184 ACCORDING/train/ACCORDING_00413
7184 SECURITY/train/SECURITY_00668
7184 SOUTHERN/train/SOUTHERN_00261
7184 LATEST/train/LATEST_00600
7184 WANTS/train/WANTS_00551
7184 CONTINUE/train/CONTINUE_00682
7184 SECRETARY/train/SECRETARY_00824
7184 SUPPORT/test/SUPPORT_00044
7184 ALMOST/train/ALMOST_00946
7184 MORNING/train/MORNING_00125
7184 COULD/train/COULD_00683
7184 KNOWN/train/KNOWN_00299
7184 COULD/train/COULD_00199
7184 SERVICE/train/SERVICE_00944
7184 FINAL/train/FINAL_00332
7184 UNDER/train/UNDER_00823
7184 DESCRIBED/test/DESCRIBED_00028
7184 EDUCATION/train/EDUCATION_00325
7184 AFFAIRS/train/AFFAIRS_00663
7184 WARNING/train/WARNING_00747
7184 STREET/train/STREET_00746
7184 SPECIAL/train/SPECIAL_00646
7184 CONTROL/train/CONTROL_00072
7184 AHEAD/test/AHEAD_00043
7184 TALKING/train/TALKING_00366
7184 USING/train/USING_00219
7184 FAMILY/train/FAMILY_00930
7184 PRESIDENT/train/PRESIDENT_00205
7184 TAKEN/train/TAKEN_00888
7184 WAITING/train/WAITING_00087
7184 HISTORY/train/HISTORY_00579
7184 GUILTY/train/GUILTY_00471
7184 INFORMATION/train/INFORMATION_00442
7184 THOUGHT/test/THOUGHT_00024
7184 INDEPENDENT/train/INDEPENDENT_00517
7184 NEEDS/train/NEEDS_00448
7184 MAKING/val/MAKING_00027
7184 HEALTH/train/HEALTH_00121
7184 MONTH/train/MONTH_00837
7184 OBAMA/train/OBAMA_00861
7184 RESULT/train/RESULT_00083
7184 INCREASE/train/INCREASE_00053
7184 JUDGE/train/JUDGE_00282
7184 OFTEN/val/OFTEN_00029
7184 THREE/train/THREE_00852
7184 HOMES/train/HOMES_00187
7184 REPORTS/train/REPORTS_00601
7184 TALKS/test/TALKS_00008
7184 CHINA/train/CHINA_00870
7184 WEEKS/train/WEEKS_00221
7184 STORY/train/STORY_00233
7184 WARNING/train/WARNING_00153
7184 SPEAKING/val/SPEAKING_00047
7184 SOCIAL/train/SOCIAL_00715
7184 PHONE/train/PHONE_00964
7184 REPORT/train/REPORT_00879
7184 TRYING/test/TRYING_00010
7184 SPEAKING/test/SPEAKING_00002
7184 RATES/train/RATES_00185
7184 WORLD/train/WORLD_00655
7184 MISSING/train/MISSING_00097
7184 TALKS/train/TALKS_00269
7184 COURT/train/COURT_00726
7184 SPEND/test/SPEND_00030
7184 DECIDED/train/DECIDED_00208
7184 LOCAL/train/LOCAL_00385
7184 OFFICERS/train/OFFICERS_00836
7184 PATIENTS/train/PATIENTS_00764
7184 AHEAD/train/AHEAD_00294
7184 BENEFITS/train/BENEFITS_00839
7184 EDUCATION/train/EDUCATION_00619
7184 WELCOME/train/WELCOME_00397
7184 CRIME/train/CRIME_00595
7184 LEVELS/train/LEVELS_00880
7184 PLACE/test/PLACE_00023
7184 TRUST/train/TRUST_00716
7184 FOREIGN/train/FOREIGN_00454
7184 MEETING/train/MEETING_00979
7184 COUNCIL/train/COUNCIL_00393
7184 EVERY/train/EVERY_00778
7184 REMEMBER/train/REMEMBER_00219
7184 HUNDREDS/train/HUNDREDS_00470
7184 ALMOST/val/ALMOST_00043
7184 STORY/train/STORY_00500
7184 STARTED/train/STARTED_00761
7184 CRISIS/train/CRISIS_00644
7184 MEMBERS/train/MEMBERS_00576
7184 COMING/train/COMING_00117
7184 CURRENT/train/CURRENT_00088
7184 DIFFERENCE/val/DIFFERENCE_00004
7184 ELECTION/train/ELECTION_00329
7184 NATIONAL/train/NATIONAL_00997
7184 CASES/train/CASES_00349
7184 IRELAND/train/IRELAND_00899
7184 SUPPORT/train/SUPPORT_00599
7184 SECOND/train/SECOND_00978
7184 INFORMATION/train/INFORMATION_00824
7184 SCHOOLS/test/SCHOOLS_00041
7184 LOOKING/train/LOOKING_00581
7184 WINDS/train/WINDS_00706
7184 BRITISH/train/BRITISH_00211
7184 AGAIN/train/AGAIN_00775
7184 HOUSING/test/HOUSING_00033
7184 CANCER/train/CANCER_00830
7184 COMES/val/COMES_00044
7184 ACCUSED/train/ACCUSED_00532
7184 MINUTES/train/MINUTES_00781
7184 ATTACK/train/ATTACK_00629
7184 CHILDREN/val/CHILDREN_00039
7184 NEEDS/train/NEEDS_00765
7184 TRIAL/train/TRIAL_00462
7184 RUSSIAN/val/RUSSIAN_00047
7184 RUSSIAN/test/RUSSIAN_00048
7184 ANNOUNCED/train/ANNOUNCED_00028
7184 AREAS/val/AREAS_00001
7184 QUESTIONS/train/QUESTIONS_00309
7184 BUILD/train/BUILD_00595
7184 SENIOR/train/SENIOR_00212
7184 MEETING/train/MEETING_00146
7184 WITHIN/train/WITHIN_00426
7184 MISSING/train/MISSING_00416
7184 MURDER/train/MURDER_00821
7184 BRING/train/BRING_00027
7184 PUBLIC/train/PUBLIC_00338
7184 LATER/train/LATER_00345
7184 COULD/val/COULD_00040
7184 WORLD/train/WORLD_00775
7184 UNTIL/train/UNTIL_00686
7184 SECOND/train/SECOND_00388
7184 ENERGY/train/ENERGY_00318
7184 MANCHESTER/val/MANCHESTER_00050
7184 MURDER/train/MURDER_00420
7184 ALLOW/val/ALLOW_00029
7184 GENERAL/test/GENERAL_00013
7184 WESTMINSTER/train/WESTMINSTER_00629
7184 MINUTES/val/MINUTES_00034
7184 WORST/test/WORST_00020
7184 HOURS/train/HOURS_00066
7184 CHILDREN/train/CHILDREN_00078
7184 NORTHERN/train/NORTHERN_00338
7184 YEARS/val/YEARS_00028
7184 DIFFERENCE/train/DIFFERENCE_00060
7184 SHOULD/train/SHOULD_00349
7184 THEIR/train/THEIR_00717
7184 EVERYBODY/test/EVERYBODY_00029
7184 BECOME/train/BECOME_00334
7184 WELCOME/train/WELCOME_00792
7184 LONGER/train/LONGER_00701
7184 RUSSIAN/train/RUSSIAN_00968
7184 MISSING/train/MISSING_00016
7184 POLICE/train/POLICE_00815
7184 AFFAIRS/train/AFFAIRS_00336
7184 TAKEN/train/TAKEN_00537
7184 LATEST/val/LATEST_00021
7184 OPERATION/train/OPERATION_00444
7184 RECENT/test/RECENT_00020
7184 FOOTBALL/train/FOOTBALL_00328
7184 OUTSIDE/train/OUTSIDE_00185
7184 YESTERDAY/train/YESTERDAY_00385
7184 LATEST/train/LATEST_00185
7184 AGAINST/train/AGAINST_00139
7184 INDEPENDENT/train/INDEPENDENT_00579
7184 BUSINESSES/train/BUSINESSES_00267
7184 MEETING/train/MEETING_00885
7184 BELIEVE/train/BELIEVE_00751
7184 FURTHER/train/FURTHER_00676
7184 NIGHT/train/NIGHT_00323
7184 STRONG/train/STRONG_00295
7184 ENGLAND/test/ENGLAND_00014
7184 EXPECT/train/EXPECT_00521
7184 ISSUE/train/ISSUE_00429
7184 HEALTH/train/HEALTH_00103
7184 DURING/test/DURING_00014
7184 ACCUSED/train/ACCUSED_00657
7184 WEATHER/train/WEATHER_00341
7184 FIGURES/train/FIGURES_00102
7184 SPECIAL/train/SPECIAL_00203
7184 BUSINESSES/val/BUSINESSES_00030
7184 ALMOST/train/ALMOST_00961
7184 COMPANY/train/COMPANY_00015
7184 ENERGY/train/ENERGY_00249
7184 PRIME/train/PRIME_00904
7184 TALKS/train/TALKS_00500
7184 TRUST/test/TRUST_00025
7184 ACCORDING/train/ACCORDING_00278
7184 FRENCH/train/FRENCH_00897
7184 EASTERN/train/EASTERN_00002
7184 BRING/val/BRING_00042
7184 RIGHTS/train/RIGHTS_00900
7184 SIMPLY/train/SIMPLY_00387
7184 GREECE/train/GREECE_00605
7184 CLAIMS/test/CLAIMS_00017
7184 CASES/train/CASES_00738
7184 PLANS/val/PLANS_00015
7184 PRISON/test/PRISON_00012
7184 ASKED/train/ASKED_00354
7184 COURT/train/COURT_00785
7184 PRICE/train/PRICE_00240
7184 MAJOR/test/MAJOR_00046
7184 LEADER/train/LEADER_00361
7184 ANOTHER/train/ANOTHER_00437
7184 CHIEF/train/CHIEF_00380
7184 SCHOOL/train/SCHOOL_00863
7184 AFTERNOON/train/AFTERNOON_00359
7184 STAFF/train/STAFF_00226
7184 FACING/train/FACING_00146
7184 LOOKING/train/LOOKING_00240
7184 WHILE/train/WHILE_00114
7184 PERSON/train/PERSON_00732
7184 ALMOST/train/ALMOST_00432
7184 COUNCIL/train/COUNCIL_00422
7184 DEBATE/train/DEBATE_00855
7184 CHILDREN/train/CHILDREN_00605
7184 FORMER/train/FORMER_00334
7184 YEARS/train/YEARS_00928
7184 SOCIAL/test/SOCIAL_00026
7184 HIGHER/train/HIGHER_00645
7184 RECORD/train/RECORD_00928
7184 SECOND/test/SECOND_00041
7184 THEIR/train/THEIR_00130
7184 WOMEN/val/WOMEN_00047
7184 TRIAL/train/TRIAL_00691
7184 CALLED/train/CALLED_00368
7184 CONFERENCE/train/CONFERENCE_00319
7184 WAITING/train/WAITING_00510
7184 EXTRA/train/EXTRA_00270
7184 OPERATION/val/OPERATION_00031
7184 TOGETHER/train/TOGETHER_00623
7184 SOCIAL/train/SOCIAL_00791
7184 PHONE/train/PHONE_00751
7184 MANCHESTER/test/MANCHESTER_00044
7184 IRELAND/train/IRELAND_00625
7184 EXPECTED/val/EXPECTED_00010
7184 CONTROL/train/CONTROL_00762
7184 OFFICIALS/train/OFFICIALS_00567
7184 SEVERAL/train/SEVERAL_00690
7184 THIRD/train/THIRD_00695
7184 THOUSANDS/test/THOUSANDS_00029
7184 PRIVATE/train/PRIVATE_00545
7184 CONFERENCE/val/CONFERENCE_00020
7184 WEATHER/train/WEATHER_00369
7184 GETTING/val/GETTING_00023
7184 WOULD/train/WOULD_00759
7184 INDEPENDENT/train/INDEPENDENT_00906
7184 DESPITE/train/DESPITE_00964
7184 THIRD/test/THIRD_00037
7184 JAMES/val/JAMES_00013
7184 TODAY/train/TODAY_00647
7184 EXPECTED/train/EXPECTED_00125
7184 GERMANY/train/GERMANY_00594
7184 EVIDENCE/val/EVIDENCE_00043
7184 OTHER/train/OTHER_00704
7184 ACCESS/train/ACCESS_00357
7184 EMERGENCY/train/EMERGENCY_00298
7184 OUTSIDE/val/OUTSIDE_00007
7184 TAKEN/train/TAKEN_00728
7184 SHOULD/train/SHOULD_00149
7184 SPENT/train/SPENT_00018
7184 HOMES/val/HOMES_00007
7184 AFFAIRS/test/AFFAIRS_00012
7184 INTEREST/train/INTEREST_00726
7184 EDITOR/train/EDITOR_00215
7184 SHORT/train/SHORT_00935
7184 CHANGE/test/CHANGE_00032
7184 GREAT/val/GREAT_00039
7184 MASSIVE/train/MASSIVE_00171
7184 MONTHS/test/MONTHS_00027
7184 SPENDING/train/SPENDING_00719
7184 RECORD/train/RECORD_00622
7184 EARLY/train/EARLY_00028
7184 PATIENTS/train/PATIENTS_00383
7184 CHANGES/test/CHANGES_00014
7184 JUSTICE/train/JUSTICE_00325
7184 PATIENTS/train/PATIENTS_00860
7184 BEING/train/BEING_00976
7184 GOVERNMENT/test/GOVERNMENT_00028
7184 TRUST/train/TRUST_00657
7184 WORST/train/WORST_00176
7184 WORDS/train/WORDS_00193
7184 OFFICERS/train/OFFICERS_00536
7184 BEFORE/val/BEFORE_00008
7184 OFFICERS/train/OFFICERS_00091
7184 LATER/train/LATER_00515
7184 EXPECTED/test/EXPECTED_00040
7184 IMPORTANT/train/IMPORTANT_00051
7184 FORCE/train/FORCE_00440
7184 GREECE/train/GREECE_00344
7184 EDUCATION/train/EDUCATION_00975
7184 PARTS/train/PARTS_00708
7184 LEADERS/train/LEADERS_00805
7184 BROUGHT/train/BROUGHT_00833
7184 MAJOR/train/MAJOR_00710
7184 YESTERDAY/train/YESTERDAY_00813
7184 CAPITAL/train/CAPITAL_00654
7184 ENERGY/train/ENERGY_00067
7184 ALLOWED/train/ALLOWED_00189
7184 FAMILIES/test/FAMILIES_00016
7184 INDUSTRY/train/INDUSTRY_00732
7184 PATIENTS/train/PATIENTS_00725
7184 MEDICAL/train/MEDICAL_00633
7184 LONGER/train/LONGER_00034
7184 CANCER/train/CANCER_00674
7184 INFORMATION/train/INFORMATION_00918
7184 INDUSTRY/val/INDUSTRY_00033
7184 AMERICAN/train/AMERICAN_00344
7184 SPECIAL/train/SPECIAL_00679
7184 AFFAIRS/train/AFFAIRS_00017
7184 DESPITE/test/DESPITE_00049
7184 GROUP/train/GROUP_00442
7184 HEALTH/val/HEALTH_00044
7184 LIVES/train/LIVES_00173
7184 GROWING/train/GROWING_00948
7184 OPERATION/train/OPERATION_00674
7184 PUBLIC/train/PUBLIC_00138
7184 PROBLEMS/train/PROBLEMS_00830
7184 PATIENTS/test/PATIENTS_00033
7184 EMERGENCY/train/EMERGENCY_00399
7184 IMMIGRATION/train/IMMIGRATION_00763
7184 CHIEF/train/CHIEF_00156
7184 BUSINESS/train/BUSINESS_00820
7184 WARNING/train/WARNING_00530
7184 EASTERN/train/EASTERN_00504
7184 FIGHTING/val/FIGHTING_00046
7184 BENEFIT/train/BENEFIT_00270
7184 WEATHER/train/WEATHER_00653
7184 ABUSE/train/ABUSE_00370
7184 SUNDAY/train/SUNDAY_00970
7184 KNOWN/train/KNOWN_00275
7184 CALLED/train/CALLED_00472
7184 GAMES/train/GAMES_00200
7184 PLACE/train/PLACE_00168
7184 FIGURES/train/FIGURES_00597
7184 RESPONSE/train/RESPONSE_00250
7184 WELCOME/val/WELCOME_00005
7184 ALMOST/train/ALMOST_00067
7184 IMPORTANT/train/IMPORTANT_00138
7184 FURTHER/train/FURTHER_00271
7184 SCHOOL/train/SCHOOL_00122
7184 WORKERS/val/WORKERS_00005
7184 EXTRA/train/EXTRA_00783
7184 TRIAL/train/TRIAL_00459
7184 FRIDAY/train/FRIDAY_00704
7184 ANNOUNCED/train/ANNOUNCED_00566
7184 CONTINUE/train/CONTINUE_00025
7184 IRELAND/train/IRELAND_00544
7184 WATCHING/train/WATCHING_00368
7184 CHIEF/train/CHIEF_00657
7184 TRIAL/train/TRIAL_00371
7184 HISTORY/train/HISTORY_00199
7184 CURRENT/train/CURRENT_00562
7184 ABOUT/train/ABOUT_00188
7184 NIGHT/train/NIGHT_00943
7184 STATES/val/STATES_00020
7184 RETURN/train/RETURN_00364
7184 ANNOUNCED/val/ANNOUNCED_00038
7184 REPORTS/test/REPORTS_00021
7184 PEOPLE/train/PEOPLE_00192
7184 SCOTTISH/train/SCOTTISH_00750
7184 BORDER/val/BORDER_00035
7184 ASKING/val/ASKING_00003
7184 COMES/train/COMES_00916
7184 EXPECTED/train/EXPECTED_00744
7184 COURT/train/COURT_00554
7184 ASKED/train/ASKED_00684
7184 ARRESTED/train/ARRESTED_00464
7184 MEASURES/test/MEASURES_00011
7184 CAMERON/test/CAMERON_00028
7184 EASTERN/train/EASTERN_00799
7184 SCHOOLS/train/SCHOOLS_00494
7184 OBAMA/train/OBAMA_00735
7184 THOUSANDS/test/THOUSANDS_00039
7184 THEMSELVES/train/THEMSELVES_00992
7184 RUNNING/train/RUNNING_00055
7184 ALLEGATIONS/train/ALLEGATIONS_00375
7184 HEART/test/HEART_00040
7184 LIVING/val/LIVING_00042
7184 FINAL/train/FINAL_00362
7184 GIVING/train/GIVING_00110
7184 MINUTES/train/MINUTES_00239
7184 AROUND/train/AROUND_00711
7184 HEART/train/HEART_00303
7184 CLAIMS/train/CLAIMS_00442
7184 STARTED/train/STARTED_00330
7184 ALLOW/train/ALLOW_00508
7184 HEART/val/HEART_00031
7184 WHILE/val/WHILE_00030
7184 INDUSTRY/train/INDUSTRY_00540
7184 COMPANY/train/COMPANY_00200
7184 SOUTHERN/train/SOUTHERN_00098
7184 LATER/test/LATER_00009
7184 CAMERON/train/CAMERON_00753
7184 FUTURE/train/FUTURE_00287
7184 BUSINESSES/train/BUSINESSES_00615
7184 OFFICERS/train/OFFICERS_00949
7184 FORMER/train/FORMER_00463
7184 ECONOMY/val/ECONOMY_00006
7184 FIGHT/train/FIGHT_00336
7184 LEVELS/train/LEVELS_00884
7184 NATIONAL/test/NATIONAL_00023
7184 HOSPITAL/train/HOSPITAL_00712
7184 OTHER/train/OTHER_00457
7184 EDUCATION/train/EDUCATION_00921
7184 INCREASE/train/INCREASE_00086
7184 GIVEN/test/GIVEN_00034
7184 HUMAN/test/HUMAN_00002
7184 KILLED/val/KILLED_00015
7184 WITHOUT/train/WITHOUT_00945
7184 LEVEL/train/LEVEL_00111
7184 SPEAKING/train/SPEAKING_00142
7184 COULD/train/COULD_00002
7184 BRITISH/train/BRITISH_00267
7184 ACCORDING/test/ACCORDING_00037
7184 COUNCIL/train/COUNCIL_00577
7184 CHANCE/test/CHANCE_00021
7184 THOUSANDS/train/THOUSANDS_00887
7184 MONTH/train/MONTH_00981
7184 ALLOW/train/ALLOW_00778
7184 MINUTES/train/MINUTES_00419
7184 STATE/train/STATE_00114
7184 WHICH/test/WHICH_00012
7184 THINGS/train/THINGS_00339
7184 ACCUSED/train/ACCUSED_00203
7184 MEMBER/test/MEMBER_00005
7184 CHIEF/train/CHIEF_00084
7184 MIGRANTS/test/MIGRANTS_00047
7184 EXTRA/val/EXTRA_00030
7184 PATIENTS/train/PATIENTS_00197
7184 ELECTION/train/ELECTION_00934
7184 STAFF/val/STAFF_00050
7184 FOLLOWING/train/FOLLOWING_00349
7184 OTHERS/train/OTHERS_00263
7184 THREE/train/THREE_00504
7184 AFTER/train/AFTER_00378
7184 NIGHT/train/NIGHT_00439
7184 THOUSANDS/train/THOUSANDS_00738
7184 ACCORDING/train/ACCORDING_00070
7184 MEASURES/train/MEASURES_00501
7184 KILLED/train/KILLED_00369
7184 WITHOUT/train/WITHOUT_00198
7184 SPEAKING/train/SPEAKING_00706
7184 OBAMA/val/OBAMA_00010
7184 JAMES/train/JAMES_00310
7184 SPECIAL/train/SPECIAL_00489
7184 SECOND/train/SECOND_00078
7184 PRISON/val/PRISON_00017
7184 HEART/train/HEART_00860
7184 SCHOOLS/train/SCHOOLS_00797
7184 WEATHER/train/WEATHER_00511
7184 SEVERAL/train/SEVERAL_00522
7184 TODAY/train/TODAY_00977
7184 HEARD/train/HEARD_00071
7184 ANNOUNCED/train/ANNOUNCED_00066
7184 THREE/train/THREE_00907
7184 MORNING/train/MORNING_00395
7184 WELCOME/train/WELCOME_00743
7184 AMERICAN/test/AMERICAN_00020
7184 SCHOOL/train/SCHOOL_00273
7184 CHINA/val/CHINA_00001
7184 LEAVE/val/LEAVE_00034
7184 SERVICES/train/SERVICES_00528
7184 WEEKEND/val/WEEKEND_00039
7184 INDUSTRY/train/INDUSTRY_00769
7184 OBAMA/train/OBAMA_00740
7184 OBAMA/train/OBAMA_00078
7184 HOUSING/test/HOUSING_00003
7184 WORKERS/train/WORKERS_00616
7184 FOLLOWING/train/FOLLOWING_00757
7184 SEVEN/train/SEVEN_00043
7184 NUMBER/val/NUMBER_00048
7184 MISSING/train/MISSING_00430
7184 WOULD/train/WOULD_00614
7184 HUNDREDS/train/HUNDREDS_00748
7184 STORY/train/STORY_00792
7184 EXPECTED/train/EXPECTED_00410
7184 PRICE/train/PRICE_00348
7184 CRIME/val/CRIME_00029
7184 STORY/train/STORY_00903
7184 SCHOOLS/test/SCHOOLS_00001
7184 OFFICIALS/test/OFFICIALS_00039
7184 INQUIRY/test/INQUIRY_00031
7184 MISSING/train/MISSING_00024
7184 SCHOOL/train/SCHOOL_00665
7184 CLAIMS/val/CLAIMS_00039
7184 WORST/train/WORST_00383
7184 POLITICS/train/POLITICS_00307
7184 EXTRA/train/EXTRA_00274
7184 PLANS/train/PLANS_00048
7184 CONTROL/train/CONTROL_00292
7184 THOUSANDS/test/THOUSANDS_00031
7184 PRICES/train/PRICES_00358
7184 COURT/train/COURT_00969
7184 SPEAKING/train/SPEAKING_00734
7184 VICTIMS/train/VICTIMS_00328
7184 ACCORDING/train/ACCORDING_00798
7184 RETURN/test/RETURN_00034
7184 CRIME/val/CRIME_00042
7184 STORY/train/STORY_00394
7184 PLANS/test/PLANS_00014
7184 LONGER/val/LONGER_00050
7184 NIGHT/train/NIGHT_00485
7184 ENERGY/val/ENERGY_00045
7184 EXPECTED/train/EXPECTED_00158
7184 PRESSURE/val/PRESSURE_00019
7184 MEASURES/train/MEASURES_00113
7184 BUSINESSES/train/BUSINESSES_00415
7184 EXTRA/test/EXTRA_00006
7184 SOUTHERN/train/SOUTHERN_00020
7184 BECAUSE/train/BECAUSE_00392
7184 WORKERS/train/WORKERS_00347
7184 INFORMATION/train/INFORMATION_00041
7184 PRESSURE/train/PRESSURE_00490
7184 CONFERENCE/val/CONFERENCE_00003
7184 IMMIGRATION/train/IMMIGRATION_00465
7184 AMOUNT/train/AMOUNT_00560
7184 ACCUSED/train/ACCUSED_00205
7184 SECTOR/test/SECTOR_00026
7184 INFORMATION/train/INFORMATION_00770
7184 MAJOR/train/MAJOR_00105
7184 DESCRIBED/train/DESCRIBED_00509
7184 REMEMBER/train/REMEMBER_00030
7184 THOUSANDS/train/THOUSANDS_00687
7184 DESPITE/train/DESPITE_00125
7184 PATIENTS/train/PATIENTS_00219
7184 RESPONSE/train/RESPONSE_00660
7184 ELECTION/train/ELECTION_00967
7184 SOCIAL/train/SOCIAL_00842
7184 WORKERS/train/WORKERS_00894
7184 PRISON/val/PRISON_00036
7184 CLAIMS/train/CLAIMS_00584
7184 ACCUSED/train/ACCUSED_00198
7184 GROWTH/train/GROWTH_00361
7184 PAYING/test/PAYING_00019
7184 MEDICAL/train/MEDICAL_00640
7184 TAKING/train/TAKING_00317
7184 CLOSE/val/CLOSE_00025
7184 EMERGENCY/train/EMERGENCY_00479
7184 PARLIAMENT/test/PARLIAMENT_00034
7184 AMONG/test/AMONG_00039
7184 BANKS/test/BANKS_00035
7184 AMERICAN/val/AMERICAN_00033
7184 FRANCE/train/FRANCE_00110
7184 POWER/val/POWER_00005
7184 HOURS/train/HOURS_00563
7184 RUNNING/test/RUNNING_00026
7184 PRISON/test/PRISON_00013
7184 DESCRIBED/train/DESCRIBED_00694
7184 MAJORITY/train/MAJORITY_00123
7184 INQUIRY/train/INQUIRY_00027
7184 MORNING/train/MORNING_00717
7184 MISSING/train/MISSING_00004
7184 CONSERVATIVE/train/CONSERVATIVE_00635
7184 TRYING/val/TRYING_00027
7184 ACCESS/train/ACCESS_00596
7184 CUSTOMERS/train/CUSTOMERS_00555
7184 TALKING/val/TALKING_00015
7184 SCHOOLS/train/SCHOOLS_00376
7184 GOVERNMENT/train/GOVERNMENT_00198
7184 WINDS/train/WINDS_00314
7184 AMONG/val/AMONG_00007
7184 SERIES/train/SERIES_00569
7184 BUSINESSES/train/BUSINESSES_00635
7184 COMES/train/COMES_00122
7184 RATES/train/RATES_00742
7184 CHILDREN/train/CHILDREN_00370
7184 LIVING/train/LIVING_00373
7184 PRISON/train/PRISON_00753
7184 FOLLOWING/train/FOLLOWING_00865
7184 AMONG/train/AMONG_00109
7184 MEETING/train/MEETING_00706
7184 ANNOUNCED/train/ANNOUNCED_00610
7184 SPEECH/train/SPEECH_00811
7184 ACCORDING/train/ACCORDING_00171
7184 HUMAN/train/HUMAN_00452
7184 PUBLIC/val/PUBLIC_00029
7184 MILLION/train/MILLION_00839
7184 MATTER/train/MATTER_00708
7184 SPENT/train/SPENT_00014
7184 INQUIRY/train/INQUIRY_00950
7184 HEALTH/test/HEALTH_00012
7184 TAKEN/train/TAKEN_00416
7184 OPERATION/train/OPERATION_00186
7184 UNTIL/train/UNTIL_00297
7184 COURT/train/COURT_00361
7184 DEATH/train/DEATH_00765
7184 GROWING/train/GROWING_00056
7184 LEADERS/train/LEADERS_00356
7184 LEVELS/train/LEVELS_00677
7184 EARLY/train/EARLY_00992
7184 CALLED/train/CALLED_00053
7184 GROUP/train/GROUP_00964
7184 WANTS/test/WANTS_00028
7184 FRENCH/train/FRENCH_00540
7184 DEATH/val/DEATH_00017
7184 FINANCIAL/train/FINANCIAL_00573
7184 SINCE/test/SINCE_00020
7184 VIOLENCE/train/VIOLENCE_00351
7184 FOUND/val/FOUND_00041
7184 YOUNG/train/YOUNG_00251
7184 BORDER/val/BORDER_00030
7184 TRIAL/train/TRIAL_00159
7184 NORTH/train/NORTH_00705
7184 CALLED/train/CALLED_00648
7184 LEAST/train/LEAST_00999
7184 CAMERON/train/CAMERON_00925
7184 HOUSE/train/HOUSE_00729
7184 EMERGENCY/train/EMERGENCY_00392
7184 SECRETARY/train/SECRETARY_00138
7184 TALKING/val/TALKING_00023
7184 FOCUS/train/FOCUS_00881
7184 MINUTES/train/MINUTES_00626
7184 OFFICIALS/val/OFFICIALS_00027
7184 BLACK/train/BLACK_00126
7184 MATTER/train/MATTER_00598
7184 BIGGEST/test/BIGGEST_00039
7184 CONCERNS/train/CONCERNS_00571
7184 MONTH/train/MONTH_00760
7184 ISLAMIC/train/ISLAMIC_00405
7184 MURDER/train/MURDER_00494
7184 AREAS/train/AREAS_00077
7184 ACCORDING/train/ACCORDING_00817
7184 SYRIA/train/SYRIA_00609
7184 HUNDREDS/train/HUNDREDS_00478
7184 SOUTHERN/train/SOUTHERN_00227
7184 SYRIAN/train/SYRIAN_00190
7184 GROWING/train/GROWING_00769
7184 ALLOWED/train/ALLOWED_00156
7184 CLAIMS/train/CLAIMS_00130
7184 MEDIA/train/MEDIA_00746
7184 WELFARE/train/WELFARE_00281
7184 ANOTHER/train/ANOTHER_00477
7184 REPORT/test/REPORT_00010
7184 AFRICA/train/AFRICA_00169
7184 LATEST/train/LATEST_00667
7184 WORST/train/WORST_00755
7184 SECRETARY/train/SECRETARY_00872
7184 ACCORDING/train/ACCORDING_00610
7184 ANOTHER/train/ANOTHER_00363
7184 MIDDLE/train/MIDDLE_00851
7184 FIRST/train/FIRST_00950
7184 ALREADY/val/ALREADY_00029
7184 POLICY/val/POLICY_00031
7184 FACING/train/FACING_00738
7184 ELECTION/train/ELECTION_00976
7184 EXPECTED/train/EXPECTED_00224
7184 SERIES/train/SERIES_00151
7184 ARRESTED/train/ARRESTED_00268
7184 IRELAND/train/IRELAND_00932
7184 KNOWN/train/KNOWN_00169
7184 BECOME/train/BECOME_00947
7184 LEADERS/train/LEADERS_00541
7184 ISLAMIC/train/ISLAMIC_00650
7184 SOUTHERN/train/SOUTHERN_00044
7184 ALLOWED/test/ALLOWED_00019
7184 TAKING/train/TAKING_00318
7184 MEMBERS/train/MEMBERS_00022
7184 PERSONAL/train/PERSONAL_00491
7184 WANTS/train/WANTS_00295
7184 COUNCIL/train/COUNCIL_00099
7184 SHOULD/train/SHOULD_00760
7184 CAPITAL/train/CAPITAL_00913
7184 ITSELF/train/ITSELF_00244
7184 GROWING/train/GROWING_00901
7184 ALMOST/train/ALMOST_00891
7184 ANNOUNCED/train/ANNOUNCED_00189
7184 STREET/train/STREET_00018
7184 ACCORDING/train/ACCORDING_00068
7184 AMERICA/train/AMERICA_00510
7184 PERHAPS/train/PERHAPS_00716
7184 MEANS/train/MEANS_00878
7184 COMES/test/COMES_00005
7184 BRITISH/train/BRITISH_00112
7184 TRUST/val/TRUST_00041
7184 REMEMBER/train/REMEMBER_00315
7184 MORNING/train/MORNING_00418
7184 STARTED/train/STARTED_00264
7184 STATE/test/STATE_00033
7184 MISSING/train/MISSING_00692
7184 MEDIA/train/MEDIA_00039
7184 EMERGENCY/train/EMERGENCY_00520
7184 MEDICAL/train/MEDICAL_00623
7184 PRICE/train/PRICE_00770
7184 REPORTS/val/REPORTS_00006
7184 UNTIL/train/UNTIL_00015
7184 CHANGE/train/CHANGE_00739
7184 BILLION/train/BILLION_00239
7184 EXPECTED/train/EXPECTED_00530
7184 OFTEN/train/OFTEN_00343
7184 PERSONAL/train/PERSONAL_00008
7184 SECRETARY/train/SECRETARY_00032
7184 MEDICAL/train/MEDICAL_00392
7184 ACCUSED/train/ACCUSED_00581
7184 THREE/train/THREE_00405
7184 SERVICE/val/SERVICE_00037
7184 DESCRIBED/train/DESCRIBED_00971
7184 MEDICAL/train/MEDICAL_00747
7184 SOCIETY/val/SOCIETY_00015
7184 ARRESTED/test/ARRESTED_00022
7184 MAJOR/val/MAJOR_00046
7184 INCREASE/val/INCREASE_00001
7184 MINUTES/train/MINUTES_00428
7184 TALKS/val/TALKS_00041
7184 ECONOMY/val/ECONOMY_00022
7184 WOMEN/train/WOMEN_00363
7184 TONIGHT/train/TONIGHT_00569
7184 UNION/train/UNION_00855
7184 OFTEN/train/OFTEN_00682
7184 BUSINESSES/test/BUSINESSES_00034
7184 WARNING/train/WARNING_00390
7184 SPEAKING/train/SPEAKING_00151
7184 OFFICE/train/OFFICE_00846
7184 ALLEGATIONS/val/ALLEGATIONS_00011
7184 MEMBER/train/MEMBER_00726
7184 RETURN/train/RETURN_00212
7184 WHETHER/test/WHETHER_00029
7184 KILLED/train/KILLED_00099
7184 WITHOUT/train/WITHOUT_00980
7184 SPEND/train/SPEND_00186
7184 CONCERNS/test/CONCERNS_00024
7184 BILLION/train/BILLION_00506
7184 STREET/train/STREET_00131
7184 WOMEN/train/WOMEN_00567
7184 HOUSE/train/HOUSE_00089
7184 OFFICE/val/OFFICE_00029
7184 TALKING/val/TALKING_00021
7184 LEAST/train/LEAST_00485
7184 HOMES/train/HOMES_00548
7184 WARNING/train/WARNING_00862
7184 MIGHT/train/MIGHT_00938
7184 EMERGENCY/train/EMERGENCY_00069
7184 OFFICE/val/OFFICE_00005
7184 STATE/train/STATE_00433
7184 CASES/train/CASES_01000
7184 LEAVE/train/LEAVE_00567
7184 SINCE/train/SINCE_00953
7184 HOMES/train/HOMES_00095
7184 SOUTHERN/train/SOUTHERN_00863
7184 MORNING/train/MORNING_00031
7184 MEDIA/train/MEDIA_00907
7184 LATEST/train/LATEST_00972
7184 THIRD/train/THIRD_00007
7184 NATIONAL/test/NATIONAL_00016
7184 WEATHER/train/WEATHER_00084
7184 TALKS/train/TALKS_00213
7184 MONTH/train/MONTH_00273
7184 EDUCATION/val/EDUCATION_00011
7184 HUNDREDS/train/HUNDREDS_00538
7184 PHONE/train/PHONE_00223
7184 ENGLAND/train/ENGLAND_00743
7184 CLAIMS/val/CLAIMS_00048
7184 WITHIN/val/WITHIN_00016
7184 UNTIL/val/UNTIL_00002
7184 FINAL/test/FINAL_00011
7184 HEARD/val/HEARD_00016
7184 BEHIND/train/BEHIND_01000
7184 PUBLIC/train/PUBLIC_00482
7184 PRETTY/train/PRETTY_00155
7184 SCOTTISH/train/SCOTTISH_00945
7184 MINUTES/val/MINUTES_00011
7184 CONCERNS/train/CONCERNS_00647
7184 TAKING/val/TAKING_00004
7184 RUSSIA/train/RUSSIA_00868
7184 BILLION/train/BILLION_00620
7184 AMONG/train/AMONG_00904
7184 PLANS/val/PLANS_00027
7184 SPECIAL/train/SPECIAL_00109
7184 AMERICAN/val/AMERICAN_00042
7184 MILLIONS/train/MILLIONS_00902
7184 SPECIAL/train/SPECIAL_00743
7184 WORKING/train/WORKING_00015
7184 NATIONAL/test/NATIONAL_00017
7184 FORCES/train/FORCES_00146
7184 MIGHT/train/MIGHT_00709
7184 DETAILS/val/DETAILS_00027
7184 OFFICERS/train/OFFICERS_00538
7184 STILL/train/STILL_00513
7184 PLANS/train/PLANS_00056
7184 TRYING/train/TRYING_00033
7184 GERMANY/train/GERMANY_00369
7184 MILLION/train/MILLION_00776
7184 LEADERS/train/LEADERS_00277
7184 THOUSANDS/train/THOUSANDS_00238
7184 CLAIMS/train/CLAIMS_00483
7184 ATTACK/val/ATTACK_00035
7184 NATIONAL/test/NATIONAL_00034
7184 THOUGHT/train/THOUGHT_00612
7184 MONEY/train/MONEY_00979
7184 SECURITY/val/SECURITY_00007
7184 MISSING/train/MISSING_00614
7184 ACCORDING/train/ACCORDING_00233
7184 EARLY/train/EARLY_00463
7184 SOMEONE/train/SOMEONE_00112
7184 PRIVATE/test/PRIVATE_00042
7184 PARTY/train/PARTY_00536
7184 SCOTTISH/train/SCOTTISH_00317
7184 WEATHER/train/WEATHER_00044
7184 SOCIAL/train/SOCIAL_00489
7184 BEFORE/train/BEFORE_00479
7184 BENEFITS/train/BENEFITS_00376
7184 ALREADY/train/ALREADY_00070
7184 GERMANY/train/GERMANY_00794
7184 WHETHER/train/WHETHER_00333
7184 ISSUE/val/ISSUE_00046
7184 INDUSTRY/train/INDUSTRY_00491
7184 GROUP/test/GROUP_00028
7184 BRITAIN/val/BRITAIN_00007
7184 THOSE/train/THOSE_00055
7184 HOUSING/train/HOUSING_00184
7184 SECURITY/train/SECURITY_00913
7184 CLAIMS/val/CLAIMS_00001
7184 CHANGES/train/CHANGES_00377
7184 LEADERS/train/LEADERS_00034
7184 COULD/train/COULD_00992
7184 BECOME/train/BECOME_00360
7184 ATTACK/train/ATTACK_00050
7184 FINANCIAL/train/FINANCIAL_00242
7184 POLITICS/train/POLITICS_00576
7184 INQUIRY/train/INQUIRY_00913
7184 MEASURES/train/MEASURES_00200
7184 TRIAL/test/TRIAL_00002
7184 LONDON/train/LONDON_00532
7184 MISSING/train/MISSING_00839
7184 VICTIMS/train/VICTIMS_00875
7184 LOOKING/train/LOOKING_00584
7184 STATES/train/STATES_00081
7184 RULES/train/RULES_00434
7184 CAPITAL/train/CAPITAL_00634
7184 SCOTTISH/train/SCOTTISH_00620
7184 WARNING/train/WARNING_00138
7184 KILLED/train/KILLED_00477
7184 EXTRA/train/EXTRA_00028
7184 TRIAL/train/TRIAL_00012
7184 ANNOUNCED/val/ANNOUNCED_00036
7184 SERIES/train/SERIES_00025
7184 MANCHESTER/train/MANCHESTER_00619
7184 WALES/train/WALES_00214
7184 SECOND/train/SECOND_00590
7184 USING/train/USING_00109
7184 LEAST/train/LEAST_00362
7184 FRENCH/train/FRENCH_00430
7184 AFFECTED/train/AFFECTED_00113
7184 ALLOWED/train/ALLOWED_00094
7184 SECRETARY/train/SECRETARY_00329
7184 LEADER/val/LEADER_00009
7184 WELCOME/train/WELCOME_00499
7184 SITUATION/train/SITUATION_00781
7184 GUILTY/train/GUILTY_00612
7184 GETTING/train/GETTING_00456
7184 SYRIA/val/SYRIA_00039
7184 ENERGY/val/ENERGY_00041
7184 LATEST/train/LATEST_00558
7184 RIGHT/train/RIGHT_00610
7184 WESTMINSTER/test/WESTMINSTER_00023
7184 ACCORDING/train/ACCORDING_00290
7184 WELFARE/test/WELFARE_00023
7184 CANCER/train/CANCER_00052
7184 SYSTEM/val/SYSTEM_00040
7184 ANNOUNCED/train/ANNOUNCED_00382
7184 INDUSTRY/train/INDUSTRY_00062
7184 GROUP/train/GROUP_00459
7184 ISLAMIC/train/ISLAMIC_00280
7184 ABUSE/train/ABUSE_00778
7184 STILL/train/STILL_00843
7184 THESE/train/THESE_00882
7184 VICTIMS/train/VICTIMS_00508
7184 RECORD/val/RECORD_00002
7184 PARTY/test/PARTY_00016
7184 SMALL/train/SMALL_00369
7184 OPERATION/train/OPERATION_00307
7184 MINUTES/train/MINUTES_00732
7184 ANNOUNCED/train/ANNOUNCED_00971
7184 ENGLAND/train/ENGLAND_00871
7184 MASSIVE/train/MASSIVE_00075
7184 MINUTES/train/MINUTES_00718
7184 LOCAL/train/LOCAL_00861
7184 STREET/val/STREET_00017
7184 WALES/train/WALES_00844
7184 INQUIRY/train/INQUIRY_00847
7184 DESCRIBED/train/DESCRIBED_00995
7184 GENERAL/val/GENERAL_00010
7184 LIVES/train/LIVES_00622
7184 IMPACT/train/IMPACT_01000
7184 ACCORDING/val/ACCORDING_00008
7184 ISLAMIC/val/ISLAMIC_00048
7184 ASKING/test/ASKING_00033
7184 DURING/train/DURING_00524
7184 SPECIAL/train/SPECIAL_00974
7184 ECONOMIC/train/ECONOMIC_00012
7184 LEVELS/train/LEVELS_00436
7184 ANYTHING/train/ANYTHING_00547
7184 THREE/train/THREE_00798
7184 CANCER/train/CANCER_00445
7184 SEVEN/train/SEVEN_00055
7184 ELECTION/train/ELECTION_00264
7184 HOMES/val/HOMES_00040
7184 CRIME/train/CRIME_00277
7184 BUSINESS/train/BUSINESS_00262
7184 ISLAMIC/train/ISLAMIC_00936
7184 CLAIMS/train/CLAIMS_00335
7184 WHILE/train/WHILE_00785
7184 SHOULD/train/SHOULD_00645
7184 FRENCH/train/FRENCH_00327
7184 QUESTION/train/QUESTION_00891
7184 NORTH/train/NORTH_00050
7184 PLACES/val/PLACES_00009
7184 FOUND/train/FOUND_00549
7184 REPORTS/train/REPORTS_00979
7184 ANNOUNCED/train/ANNOUNCED_00424
7184 THEIR/val/THEIR_00011
7184 AREAS/train/AREAS_00357
7184 ENGLAND/test/ENGLAND_00006
7184 SECURITY/val/SECURITY_00017
7184 RETURN/test/RETURN_00036
7184 DESCRIBED/train/DESCRIBED_00977
7184 CHALLENGE/train/CHALLENGE_00634
7184 TAKEN/train/TAKEN_00533
7184 MIGRANTS/train/MIGRANTS_00247
7184 CANCER/test/CANCER_00007
7184 FOUND/val/FOUND_00016
7184 GOING/val/GOING_00024
7184 CHARGES/train/CHARGES_00589
7184 WESTERN/train/WESTERN_00295
7184 SINCE/val/SINCE_00038
7184 WESTMINSTER/train/WESTMINSTER_00751
7184 UNTIL/val/UNTIL_00031
7184 TRADE/train/TRADE_00820
7184 WARNING/train/WARNING_00712
7184 SPEAKING/train/SPEAKING_00788
7184 LIKELY/train/LIKELY_00441
7184 COMING/val/COMING_00041
7184 UNION/train/UNION_00307
7184 WITHIN/train/WITHIN_00891
7184 THEIR/train/THEIR_00253
7184 SCHOOL/train/SCHOOL_01000
7184 AFRICA/test/AFRICA_00018
7184 SHORT/train/SHORT_00201
7184 BUSINESSES/train/BUSINESSES_00480
7184 FRANCE/train/FRANCE_00278
7184 RETURN/test/RETURN_00035
7184 THEIR/test/THEIR_00013
7184 INDUSTRY/train/INDUSTRY_00212
7184 NATIONAL/test/NATIONAL_00035
7184 STAGE/train/STAGE_00693
7184 FIGHTING/val/FIGHTING_00029
7184 AMOUNT/train/AMOUNT_00779
7184 EXPECTED/train/EXPECTED_00241
7184 LEADERSHIP/val/LEADERSHIP_00011
7184 NIGHT/val/NIGHT_00034
7184 QUESTION/val/QUESTION_00014
7184 ACCORDING/train/ACCORDING_00840
7184 OBAMA/train/OBAMA_00498
7184 FRONT/train/FRONT_00594
7184 SERVICE/train/SERVICE_00919
7184 SERIES/val/SERIES_00005
7184 WHICH/train/WHICH_00356
7184 MONTH/train/MONTH_00270
7184 TAKEN/train/TAKEN_00235
7184 CONFERENCE/train/CONFERENCE_00718
7184 SPECIAL/train/SPECIAL_00845
7184 NORTH/train/NORTH_00993
7184 THIRD/train/THIRD_00021
7184 SERVICE/train/SERVICE_00637
7184 OTHERS/test/OTHERS_00027
7184 LONGER/train/LONGER_00300
7184 BROUGHT/train/BROUGHT_00674
7184 SCHOOL/train/SCHOOL_00283
7184 MANCHESTER/train/MANCHESTER_00096
7184 COMING/val/COMING_00038
7184 CAMERON/train/CAMERON_00615
7184 MATTER/train/MATTER_00035
7184 SCHOOLS/train/SCHOOLS_00428
7184 WATCHING/train/WATCHING_00658
7184 SUNDAY/val/SUNDAY_00020
7184 RIGHTS/train/RIGHTS_00762
7184 MINISTERS/train/MINISTERS_00613
7184 PLANS/train/PLANS_00676
7184 STATEMENT/train/STATEMENT_00052
7184 FINAL/val/FINAL_00046
7184 ACCUSED/train/ACCUSED_00151
7184 INQUIRY/train/INQUIRY_00201
7184 BECOME/train/BECOME_00664
7184 PLACES/train/PLACES_00907
7184 DECIDED/train/DECIDED_00237
7184 BENEFITS/train/BENEFITS_00114
7184 REFERENDUM/train/REFERENDUM_00553
7184 SPEND/train/SPEND_00476
7184 CONTINUE/train/CONTINUE_00094
7184 MISSING/train/MISSING_00213
7184 FINAL/train/FINAL_00170
7184 WATER/val/WATER_00026
7184 STREET/val/STREET_00021
7184 EXTRA/test/EXTRA_00004
7184 SPEECH/train/SPEECH_00223
7184 GROWTH/train/GROWTH_00173
7184 EARLY/train/EARLY_00440
7184 CHINA/train/CHINA_00739
7184 SINCE/train/SINCE_00116
7184 KNOWN/train/KNOWN_00819
7184 WELFARE/train/WELFARE_00311
7184 ATTACK/train/ATTACK_00212
7184 ATTACK/train/ATTACK_00875
7184 CHILDREN/train/CHILDREN_00980
7184 CONSERVATIVE/train/CONSERVATIVE_00085
7184 NEVER/train/NEVER_00332
7184 DETAILS/test/DETAILS_00001
7184 SCHOOL/train/SCHOOL_00874
7184 DURING/train/DURING_00016
7184 WHETHER/val/WHETHER_00041
7184 REPORTS/test/REPORTS_00036
7184 ANNOUNCED/train/ANNOUNCED_00345
7184 ENGLAND/test/ENGLAND_00013
7184 EUROPE/train/EUROPE_00403
7184 FIGURES/test/FIGURES_00036
7184 FOUND/train/FOUND_00956
7184 VICTIMS/val/VICTIMS_00020
7184 OFFICIALS/train/OFFICIALS_00036
7184 TALKING/train/TALKING_00692
7184 SERVICES/train/SERVICES_00395
7184 USING/train/USING_00714
7184 SCHOOLS/val/SCHOOLS_00049
7184 TODAY/test/TODAY_00041
7184 SCHOOL/train/SCHOOL_00255
7184 FINAL/train/FINAL_00230
7184 HEALTH/test/HEALTH_00031
7184 PERSONAL/val/PERSONAL_00002
7184 WORKING/test/WORKING_00027
7184 CHALLENGE/train/CHALLENGE_00566
7184 CHALLENGE/train/CHALLENGE_00611
7184 CANCER/train/CANCER_00452
7184 MURDER/train/MURDER_00888
7184 MINISTER/train/MINISTER_00553
7184 PATIENTS/train/PATIENTS_00736
7184 RESULT/train/RESULT_00567
7184 CAMPAIGN/train/CAMPAIGN_00188
7184 PRESS/test/PRESS_00042
7184 MIDDLE/train/MIDDLE_00932
7184 PRICES/train/PRICES_00735
7184 PLACE/train/PLACE_00722
7184 RUNNING/train/RUNNING_00742
7184 IRELAND/train/IRELAND_00999
7184 NORTH/train/NORTH_00657
7184 LIVING/val/LIVING_00021
7184 CLEAR/train/CLEAR_00134
7184 RECORD/train/RECORD_00652
7184 PRIME/train/PRIME_00217
7184 GOVERNMENT/test/GOVERNMENT_00042
7184 COUNCIL/train/COUNCIL_00468
7184 SCHOOLS/train/SCHOOLS_00015
7184 RECORD/train/RECORD_00558
7184 BRITAIN/train/BRITAIN_00974
7184 LATER/train/LATER_00670
7184 WARNING/train/WARNING_00907
7184 NUMBERS/train/NUMBERS_00020
7184 STATES/train/STATES_00056
7184 ACCORDING/train/ACCORDING_00044
7184 PRESSURE/train/PRESSURE_00066
7184 WARNING/train/WARNING_00443
7184 BANKS/train/BANKS_00515
7184 KNOWN/test/KNOWN_00031
7184 FOUND/train/FOUND_00512
7184 KNOWN/train/KNOWN_00130
7184 LONDON/train/LONDON_00311
7184 SOCIAL/train/SOCIAL_00734
7184 PERIOD/val/PERIOD_00044
7184 CALLED/val/CALLED_00038
7184 INDUSTRY/train/INDUSTRY_00364
7184 AMOUNT/train/AMOUNT_00935
7184 MEDICAL/train/MEDICAL_00303
7184 FACING/train/FACING_00403
7184 MORNING/train/MORNING_00557
7184 MIGRANTS/test/MIGRANTS_00050
7184 FURTHER/train/FURTHER_00780
7184 SEVERAL/train/SEVERAL_00917
7184 IRELAND/train/IRELAND_00137
7184 EDUCATION/train/EDUCATION_00057
7184 EXPECTED/train/EXPECTED_00275
7184 PRESSURE/train/PRESSURE_00191
7184 MINISTERS/train/MINISTERS_00072
7184 CURRENT/train/CURRENT_00751
7184 GROUP/val/GROUP_00008
7184 SCHOOLS/train/SCHOOLS_00924
7184 ACCORDING/train/ACCORDING_00862
7184 GROWING/train/GROWING_00627
7184 MORNING/train/MORNING_00482
7184 FINANCIAL/train/FINANCIAL_00818
7184 MORNING/train/MORNING_00345
7184 COULD/train/COULD_00588
7184 SERVICE/train/SERVICE_00967
7184 MEMBER/train/MEMBER_00788
7184 NEEDS/test/NEEDS_00023
7184 VOTERS/train/VOTERS_00460
7184 POLITICAL/train/POLITICAL_00952
7184 MEMBERS/train/MEMBERS_00894
7184 GROWTH/train/GROWTH_00786
7184 PATIENTS/train/PATIENTS_00694
7184 THOSE/train/THOSE_00131
7184 ACCORDING/train/ACCORDING_00081
7184 OFTEN/val/OFTEN_00034
7184 PEOPLE/train/PEOPLE_00835
7184 RATHER/val/RATHER_00030
7184 ELECTION/train/ELECTION_00548
7184 EXPECTED/train/EXPECTED_00811
7184 TEMPERATURES/train/TEMPERATURES_00108
7184 FAMILIES/train/FAMILIES_00814
7184 FOUND/train/FOUND_00491
7184 SOCIAL/train/SOCIAL_00929
7184 ALLOW/val/ALLOW_00043
7184 SPEAKING/train/SPEAKING_00939
7184 MINISTER/train/MINISTER_00807
7184 GIVING/train/GIVING_00085
7184 FORCE/train/FORCE_00390
7184 ATTACKS/train/ATTACKS_00120
7184 CUSTOMERS/train/CUSTOMERS_00017
7184 MIGRANTS/train/MIGRANTS_00214
7184 NUMBERS/train/NUMBERS_00656
7184 WARNING/train/WARNING_00852
7184 CHILDREN/train/CHILDREN_00184
7184 ARRESTED/train/ARRESTED_00641
7184 WATER/train/WATER_00364
7184 POWERS/test/POWERS_00046
7184 EMERGENCY/train/EMERGENCY_00350
7184 SINGLE/train/SINGLE_00002
7184 SECOND/train/SECOND_00411
7184 TALKING/train/TALKING_00811
7184 INQUIRY/train/INQUIRY_00218
7184 LEADER/train/LEADER_00276
7184 NORTHERN/train/NORTHERN_00860
7184 OFFICIALS/train/OFFICIALS_00231
7184 RUSSIAN/train/RUSSIAN_00879
7184 INDUSTRY/train/INDUSTRY_00680
7184 GLOBAL/val/GLOBAL_00043
7184 AFFECTED/train/AFFECTED_00754
7184 POTENTIAL/train/POTENTIAL_00257
7184 THOUSANDS/train/THOUSANDS_00497
7184 BUILD/train/BUILD_00160
7184 GIVEN/test/GIVEN_00041
7184 UNITED/train/UNITED_00251
7184 EARLY/train/EARLY_00510
7184 REPORT/train/REPORT_00330
7184 BUSINESS/train/BUSINESS_00882
7184 CALLED/train/CALLED_00572
7184 INDEPENDENT/train/INDEPENDENT_00904
7184 LEAST/val/LEAST_00039
7184 BANKS/train/BANKS_00188
7184 CHANGE/train/CHANGE_00829
7184 ARRESTED/train/ARRESTED_00796
7184 ECONOMY/val/ECONOMY_00047
7184 ACCORDING/val/ACCORDING_00029
7184 GROUP/train/GROUP_00273
7184 ABUSE/train/ABUSE_00275
7184 RIGHT/train/RIGHT_00650
7184 INFORMATION/test/INFORMATION_00026
7184 FORMER/train/FORMER_00401
7184 DESPITE/val/DESPITE_00032
7184 PATIENTS/train/PATIENTS_00370
7184 RETURN/train/RETURN_00205
7184 PROBLEMS/val/PROBLEMS_00027
7184 HOMES/train/HOMES_00033
7184 SERVICE/val/SERVICE_00042
7184 SPEAKING/train/SPEAKING_00585
7184 TRUST/train/TRUST_00003
7184 GIVING/train/GIVING_00416
7184 CHILD/train/CHILD_00328
7184 HEALTH/train/HEALTH_00919
7184 RULES/test/RULES_00045
7184 SPENT/train/SPENT_00415
7184 MANCHESTER/train/MANCHESTER_00390
7184 YEARS/train/YEARS_00062
7184 BLACK/train/BLACK_00271
7184 BECOME/train/BECOME_00607
7184 CHILDREN/train/CHILDREN_00155
7184 OFFICIALS/train/OFFICIALS_00534
7184 MEMBERS/train/MEMBERS_00322
7184 MINISTER/train/MINISTER_00294
7184 ENOUGH/val/ENOUGH_00025
7184 GROUP/train/GROUP_00849
7184 CASES/train/CASES_00022
7184 HEALTH/train/HEALTH_00598
7184 INCREASE/test/INCREASE_00007
7184 THREAT/val/THREAT_00034
7184 LIVES/train/LIVES_00614
7184 LOOKING/val/LOOKING_00001
7184 LEGAL/train/LEGAL_00154
7184 ACCUSED/train/ACCUSED_00225
7184 REPORTS/val/REPORTS_00039
7184 HAPPENING/train/HAPPENING_00126
7184 EXACTLY/test/EXACTLY_00030
7184 LEAVE/train/LEAVE_00547
7184 PARENTS/train/PARENTS_00141
7184 ECONOMY/train/ECONOMY_00910
7184 CURRENT/train/CURRENT_00673
7184 ANNOUNCED/train/ANNOUNCED_00251
7184 OFFICERS/train/OFFICERS_00982
7184 LABOUR/train/LABOUR_00430
7184 PARENTS/train/PARENTS_00044
7184 PROVIDE/train/PROVIDE_00394
7184 NIGHT/val/NIGHT_00048
7184 WARNING/train/WARNING_00587
7184 KILLED/train/KILLED_00716
7184 INQUIRY/train/INQUIRY_00398
7184 AMONG/val/AMONG_00016
7184 ALLOWED/train/ALLOWED_00288
7184 COURT/train/COURT_00181
7184 ACCORDING/test/ACCORDING_00003
7184 CALLED/train/CALLED_00328
7184 ASKED/train/ASKED_00894
7184 RIGHTS/test/RIGHTS_00015
7184 DIFFERENT/val/DIFFERENT_00022
7184 COMPANIES/train/COMPANIES_00645
7184 DIFFICULT/test/DIFFICULT_00036
7184 NEEDS/val/NEEDS_00037
7184 THEMSELVES/train/THEMSELVES_00954
7184 GEORGE/train/GEORGE_00758
7184 HOSPITAL/train/HOSPITAL_00372
7184 EVENTS/train/EVENTS_00785
7184 MISSING/train/MISSING_00532
7184 WESTMINSTER/test/WESTMINSTER_00010
7184 ATTACK/train/ATTACK_00666
7184 BRITISH/train/BRITISH_00203
7184 FORCE/train/FORCE_00154
7184 REPORTS/train/REPORTS_00555
7184 SERIOUS/train/SERIOUS_00789
7184 CONFERENCE/test/CONFERENCE_00025
7184 CUSTOMERS/train/CUSTOMERS_00800
7184 WOMEN/test/WOMEN_00002
7184 NEVER/val/NEVER_00016
7184 POLITICAL/train/POLITICAL_00808
7184 STAFF/train/STAFF_00178
7184 PROBLEMS/train/PROBLEMS_00171
7184 STORY/train/STORY_00129
7184 LEAVE/test/LEAVE_00041
7184 MONEY/train/MONEY_00533
7184 MONEY/train/MONEY_00829
7184 TRADE/train/TRADE_00496
7184 CUSTOMERS/train/CUSTOMERS_00148
7184 ACCUSED/test/ACCUSED_00002
7184 AHEAD/train/AHEAD_00369
7184 CHINA/test/CHINA_00020
7184 STATE/train/STATE_00943
7184 INFORMATION/train/INFORMATION_00462
7184 INTEREST/train/INTEREST_00183
7184 PLANS/train/PLANS_00180
7184 CURRENT/val/CURRENT_00046
7184 OUTSIDE/val/OUTSIDE_00015
7184 PRESS/test/PRESS_00036
7184 STAND/train/STAND_00999
7184 SEVERAL/train/SEVERAL_00475
7184 TALKING/train/TALKING_00223
7184 WORKERS/train/WORKERS_00660
7184 CANNOT/train/CANNOT_00173
7184 BENEFITS/train/BENEFITS_00793
7184 AUTHORITIES/test/AUTHORITIES_00034
7184 FIRST/train/FIRST_00109
7184 THREE/train/THREE_00666
7184 IMPACT/train/IMPACT_00327
7184 HEALTH/val/HEALTH_00014
7184 MESSAGE/train/MESSAGE_00329
7184 THEIR/train/THEIR_00634
7184 STAGE/train/STAGE_00161
7184 SEVERAL/train/SEVERAL_00151
7184 CHILDREN/train/CHILDREN_00394
7184 AUTHORITIES/train/AUTHORITIES_00719
7184 HOSPITAL/train/HOSPITAL_00570
7184 GROUP/test/GROUP_00047
7184 STORY/val/STORY_00047
7184 WORKING/train/WORKING_00497
7184 DESPITE/test/DESPITE_00011
7184 BIGGEST/val/BIGGEST_00030
7184 RATHER/train/RATHER_00727
7184 ACCUSED/test/ACCUSED_00041
7184 UNTIL/train/UNTIL_00997
7184 BIGGEST/train/BIGGEST_00607
7184 THOSE/test/THOSE_00036
7184 LEADERS/train/LEADERS_00284
7184 MAKING/train/MAKING_00516
7184 GEORGE/train/GEORGE_00163
7184 BUSINESSES/train/BUSINESSES_00700
7184 SOUTH/train/SOUTH_00638
7184 SCHOOL/train/SCHOOL_00153
7184 PLANS/train/PLANS_00405
7184 CHIEF/train/CHIEF_00784
7184 ACCORDING/train/ACCORDING_00453
7184 THEIR/train/THEIR_00155
7184 STATE/train/STATE_00420
7184 OFTEN/train/OFTEN_00123
7184 WELFARE/train/WELFARE_00559
7184 INCREASE/train/INCREASE_00442
7184 GAMES/train/GAMES_00269
7184 GROWTH/train/GROWTH_00651
7184 OBAMA/train/OBAMA_00292
7184 BORDER/train/BORDER_00901
7184 CHIEF/train/CHIEF_00556
7184 WOMEN/train/WOMEN_00781
7184 ACTION/train/ACTION_00444
7184 SIDES/val/SIDES_00023
7184 BUDGET/train/BUDGET_00311
7184 ALMOST/train/ALMOST_00011
7184 SMALL/train/SMALL_00007
7184 WELCOME/train/WELCOME_00290
7184 ANNOUNCED/train/ANNOUNCED_00857
7184 PERSON/test/PERSON_00021
7184 MORNING/train/MORNING_00046
7184 REPORT/train/REPORT_00812
7184 REPORT/train/REPORT_00675
7184 RATHER/train/RATHER_00771
7184 MEETING/val/MEETING_00046
7184 FACING/train/FACING_00612
7184 SEVERAL/train/SEVERAL_00238
7184 FRIDAY/train/FRIDAY_00049
7184 MISSING/val/MISSING_00048
7184 ENERGY/train/ENERGY_00791
7184 CHILDREN/test/CHILDREN_00001
7184 SPEAKING/val/SPEAKING_00019
7184 DECISION/train/DECISION_00821
7184 GROWTH/train/GROWTH_00562
7184 LIVING/train/LIVING_00347
7184 USING/train/USING_00831
7184 BEHIND/train/BEHIND_00452
7184 FAMILY/train/FAMILY_00884
7184 HOMES/test/HOMES_00029
7184 THIRD/train/THIRD_00714
7184 INCREASE/test/INCREASE_00042
7184 GIVING/train/GIVING_00667
7184 HEALTH/test/HEALTH_00029
7184 POWER/val/POWER_00029
7184 FOLLOWING/train/FOLLOWING_00794
7184 SAYING/test/SAYING_00036
7184 AMERICA/train/AMERICA_00758
7184 LATER/train/LATER_00234
7184 MEANS/val/MEANS_00043
7184 RUSSIA/test/RUSSIA_00032
7184 THIRD/train/THIRD_00140
7184 AFRICA/train/AFRICA_00178
7184 AMERICA/train/AMERICA_00762
7184 ENERGY/train/ENERGY_00837
7184 BUSINESSES/train/BUSINESSES_00300
7184 CANNOT/train/CANNOT_00174
7184 PRIME/train/PRIME_00431
7184 PERSONAL/train/PERSONAL_00265
7184 ACCORDING/train/ACCORDING_00687
7184 DESPITE/train/DESPITE_00762
7184 CHANCE/test/CHANCE_00011
7184 FOOTBALL/train/FOOTBALL_00149
7184 SCOTLAND/train/SCOTLAND_00957
7184 THOSE/train/THOSE_00149
7184 STATES/train/STATES_00269
7184 WAITING/train/WAITING_00634
7184 FRIDAY/test/FRIDAY_00025
7184 EVERY/train/EVERY_00953
7184 OTHERS/val/OTHERS_00013
7184 AFFAIRS/train/AFFAIRS_00580
7184 DAVID/train/DAVID_00702
7184 IMPACT/train/IMPACT_00662
7184 FIGURES/train/FIGURES_00233
7184 SECOND/train/SECOND_00191
7184 PATIENTS/val/PATIENTS_00003
7184 JAMES/test/JAMES_00028
7184 ISLAMIC/train/ISLAMIC_00981
7184 STAND/train/STAND_00958
7184 LATEST/train/LATEST_00271
7184 COUNTRIES/train/COUNTRIES_00810
7184 SPENT/test/SPENT_00038
7184 MINISTERS/train/MINISTERS_00570
7184 JAMES/val/JAMES_00004
7184 CUSTOMERS/train/CUSTOMERS_00728
7184 WHILE/train/WHILE_00380
7184 MISSING/train/MISSING_00074
7184 FACING/val/FACING_00028
7184 RECENT/train/RECENT_00600
7184 FOLLOWING/train/FOLLOWING_00322
7184 WINDS/train/WINDS_00269
7184 SPENDING/train/SPENDING_00499
7184 PLANS/train/PLANS_00131
7184 LEADERS/train/LEADERS_00422
7184 ALLEGATIONS/train/ALLEGATIONS_00966
7184 WARNING/val/WARNING_00046
7184 FORCE/train/FORCE_00793
7184 OFTEN/test/OFTEN_00048
7184 ANYTHING/train/ANYTHING_00855
7184 LATER/train/LATER_00742
7184 EXTRA/train/EXTRA_00024
7184 REPORT/train/REPORT_00078
7184 LONGER/train/LONGER_00010
7184 THIRD/train/THIRD_00368
7184 DAVID/val/DAVID_00017
7184 MAJOR/train/MAJOR_00067
7184 ASKING/train/ASKING_00362
7184 THREAT/train/THREAT_00992
7184 ACCORDING/train/ACCORDING_00677
7184 AMERICA/train/AMERICA_00658
7184 TRADE/train/TRADE_00111
7184 SPENDING/val/SPENDING_00048
7184 SUPPORT/train/SUPPORT_00465
7184 SOCIAL/train/SOCIAL_00065
7184 PRESS/train/PRESS_00587
7184 ALLEGATIONS/test/ALLEGATIONS_00026
7184 BUILDING/train/BUILDING_00551
7184 ATTACK/train/ATTACK_00835
7184 PHONE/train/PHONE_00443
7184 OFFICE/train/OFFICE_00332
7184 GERMANY/train/GERMANY_00527
7184 ACROSS/train/ACROSS_00314
7184 UNDER/train/UNDER_00567
7184 WARNING/train/WARNING_00090
7184 SECRETARY/test/SECRETARY_00035
7184 WEATHER/train/WEATHER_00439
7184 PLANS/train/PLANS_00183
7184 SEVEN/val/SEVEN_00011
7184 OFFICIALS/train/OFFICIALS_00639
7184 THOSE/train/THOSE_00917
7184 GERMANY/val/GERMANY_00025
7184 GREAT/val/GREAT_00022
7184 MOMENT/train/MOMENT_00411
7184 SCHOOL/train/SCHOOL_00850
7184 ACCUSED/train/ACCUSED_00003
7184 EDUCATION/train/EDUCATION_00905
7184 CHIEF/train/CHIEF_00710
7184 ABUSE/train/ABUSE_00571
7184 MURDER/train/MURDER_00642
7184 DIFFERENT/train/DIFFERENT_00760
7184 SERIES/train/SERIES_00830
7184 MINISTERS/train/MINISTERS_00497
7184 EMERGENCY/train/EMERGENCY_00808
7184 CHILDREN/train/CHILDREN_00422
7184 PERSON/train/PERSON_00470
7184 ORDER/train/ORDER_00877
7184 OUTSIDE/val/OUTSIDE_00040
7184 MONEY/train/MONEY_00555
7184 GETTING/train/GETTING_00108
7184 PLACES/train/PLACES_00058
7184 UNDER/train/UNDER_00235
7184 FOUND/train/FOUND_00869
7184 PARENTS/train/PARENTS_00047
7184 POLICE/train/POLICE_00455
7184 SECOND/train/SECOND_00376
7184 SOUTH/train/SOUTH_00994
7184 SINGLE/train/SINGLE_00793
7184 SPEND/test/SPEND_00006
7184 ANNOUNCED/train/ANNOUNCED_00081
7184 HOMES/train/HOMES_00453
7184 AGREEMENT/train/AGREEMENT_00510
7184 BEING/train/BEING_00666
7184 HOSPITAL/train/HOSPITAL_00536
7184 MIGRANTS/train/MIGRANTS_00642
7184 TOWARDS/train/TOWARDS_00732
7184 WHETHER/train/WHETHER_00363
7184 CRIME/val/CRIME_00047
7184 GROUP/val/GROUP_00048
7184 DURING/train/DURING_00658
7184 AMERICAN/val/AMERICAN_00022
7184 AMERICAN/train/AMERICAN_00838
7184 SINGLE/train/SINGLE_00371
7184 TONIGHT/train/TONIGHT_00908
7184 TODAY/val/TODAY_00025
7184 PRIME/train/PRIME_00499
7184 PARENTS/train/PARENTS_00840
7184 HOUSING/test/HOUSING_00050
7184 BEING/train/BEING_00620
7184 POWER/val/POWER_00023
7184 SHOULD/train/SHOULD_00615
7184 WARNING/train/WARNING_00385
7184 BILLION/val/BILLION_00004
7184 SCHOOL/train/SCHOOL_00884
7184 REPORT/test/REPORT_00015
7184 CANCER/val/CANCER_00025
7184 RULES/train/RULES_00771
7184 SENSE/val/SENSE_00030
7184 FORCES/train/FORCES_00481
7184 LEVEL/test/LEVEL_00028
7184 STATES/train/STATES_00656
7184 COMING/train/COMING_00802
7184 MARKET/test/MARKET_00016
7184 PRICES/train/PRICES_00924
7184 SERIES/val/SERIES_00036
7184 SPECIAL/train/SPECIAL_00146
7184 SYRIAN/train/SYRIAN_00487
7184 LARGE/val/LARGE_00048
7184 EXTRA/test/EXTRA_00031
7184 AHEAD/train/AHEAD_00711
7184 LATEST/train/LATEST_00928
7184 OFFICE/train/OFFICE_00782
7184 ENGLAND/train/ENGLAND_00931
7184 WATCHING/train/WATCHING_00539
7184 WESTERN/train/WESTERN_00278
7184 FRANCE/test/FRANCE_00044
7184 ANNOUNCED/train/ANNOUNCED_00658
7184 MINISTERS/val/MINISTERS_00038
7184 TRIAL/test/TRIAL_00041
7184 SERVICES/train/SERVICES_00261
7184 STORY/val/STORY_00002
7184 TODAY/train/TODAY_00387
7184 STAND/train/STAND_00714
7184 MILLION/train/MILLION_00605
7184 EUROPEAN/train/EUROPEAN_00888
7184 SOUTHERN/train/SOUTHERN_00542
7184 COUNCIL/val/COUNCIL_00042
7184 WORKERS/train/WORKERS_00407
7184 HAPPENED/val/HAPPENED_00017
7184 STATES/train/STATES_00206
7184 SPECIAL/train/SPECIAL_00673
7184 DECISION/train/DECISION_00600
7184 MIGRANTS/train/MIGRANTS_00490
7184 GROWING/test/GROWING_00046
7184 SERIES/train/SERIES_00172
7184 PLANS/train/PLANS_00498
7184 WARNING/train/WARNING_00690
7184 SYSTEM/train/SYSTEM_00084
7184 POLICY/train/POLICY_00182
7184 POWER/test/POWER_00022
7184 SCHOOLS/val/SCHOOLS_00017
7184 HUNDREDS/train/HUNDREDS_00347
7184 REPORTS/train/REPORTS_00493
7184 YOUNG/train/YOUNG_00058
7184 STATES/train/STATES_00416
7184 GEORGE/train/GEORGE_00855
7184 FIRST/train/FIRST_00112
7184 SPEAKING/train/SPEAKING_00252
7184 RUSSIA/train/RUSSIA_00698
7184 WHERE/test/WHERE_00007
7184 UNTIL/train/UNTIL_00624
7184 ANNOUNCED/train/ANNOUNCED_00841
7184 EVENTS/test/EVENTS_00018
7184 LATEST/train/LATEST_00678
7184 LIKELY/train/LIKELY_00601
7184 BLACK/train/BLACK_00127
7184 GROUP/train/GROUP_00916
7184 FORCES/train/FORCES_00825
7184 RESULT/train/RESULT_00943
7184 MEDIA/train/MEDIA_00306
7184 SINCE/train/SINCE_00559
7184 WHETHER/train/WHETHER_00717
7184 CRISIS/val/CRISIS_00031
7184 COMPANIES/train/COMPANIES_00043
7184 SPEAKING/test/SPEAKING_00024
7184 SERIOUS/train/SERIOUS_00950
7184 YESTERDAY/train/YESTERDAY_00522
7184 WELFARE/train/WELFARE_00308
7184 POTENTIAL/val/POTENTIAL_00040
7184 CRISIS/train/CRISIS_00323
7184 YOUNG/train/YOUNG_00125
7184 DESCRIBED/train/DESCRIBED_00346
7184 LIKELY/train/LIKELY_00909
7184 CHILD/train/CHILD_00776
7184 HOURS/train/HOURS_00788
7184 TALKS/train/TALKS_00667
7184 COUNCIL/train/COUNCIL_00786
7184 INFORMATION/train/INFORMATION_00147
7184 EVERY/train/EVERY_00135
7184 MASSIVE/train/MASSIVE_00357
7184 EMERGENCY/train/EMERGENCY_00670
7184 MINISTER/train/MINISTER_00214
7184 DIFFICULT/train/DIFFICULT_00654
7184 UNION/train/UNION_00634
7184 BETWEEN/val/BETWEEN_00050
7184 SECURITY/train/SECURITY_00984
7184 CAPITAL/train/CAPITAL_00569
7184 MIGRANTS/train/MIGRANTS_00222
7184 AUTHORITIES/train/AUTHORITIES_00775
7184 GIVING/train/GIVING_00868
7184 STATES/train/STATES_00137
7184 ACCUSED/train/ACCUSED_00681
7184 SYRIA/train/SYRIA_00602
7184 FACING/train/FACING_00153
7184 MONEY/train/MONEY_00490
7184 SOUTHERN/train/SOUTHERN_00893
7184 MURDER/train/MURDER_00933
7184 DETAILS/train/DETAILS_00324
7184 LEADERS/train/LEADERS_00748
7184 LEVEL/train/LEVEL_00842
7184 LEAVE/train/LEAVE_00096
7184 AFFECTED/train/AFFECTED_00429
7184 HUNDREDS/val/HUNDREDS_00027
7184 SPEAKING/train/SPEAKING_00695
7184 PHONE/train/PHONE_00615
7184 PROBLEMS/train/PROBLEMS_00098
7184 DURING/train/DURING_00079
7184 THEIR/train/THEIR_00445
7184 DURING/train/DURING_00334
7184 FIRST/train/FIRST_00867
7184 ACCORDING/train/ACCORDING_00063
7184 BILLION/train/BILLION_00222
7184 DAVID/train/DAVID_00130
7184 ACCORDING/train/ACCORDING_00010
7184 RECORD/train/RECORD_00468
7184 TAKEN/train/TAKEN_00513
7184 COUNCIL/train/COUNCIL_00280
7184 PARTY/train/PARTY_00819
7184 PLACE/train/PLACE_00330
7184 FOUND/train/FOUND_00525
7184 FIGHT/train/FIGHT_00370
7184 ENOUGH/train/ENOUGH_00218
7184 THOUSANDS/train/THOUSANDS_00572
7184 OUTSIDE/train/OUTSIDE_00492
7184 ANNOUNCED/train/ANNOUNCED_00764
7184 COURSE/train/COURSE_00128
7184 REPORTS/train/REPORTS_00991
7184 ACTION/train/ACTION_00172
7184 OBAMA/train/OBAMA_00361
7184 LIKELY/test/LIKELY_00049
7184 AFTER/train/AFTER_00383
7184 ARRESTED/train/ARRESTED_00736
7184 VICTIMS/train/VICTIMS_00593
7184 LATER/train/LATER_00151
7184 SIGNIFICANT/train/SIGNIFICANT_00389
7184 MONEY/test/MONEY_00046
7184 WOMEN/train/WOMEN_00177
7184 REPORT/train/REPORT_00525
7184 COMPANY/train/COMPANY_00733
7184 AHEAD/train/AHEAD_00889
7184 NUMBER/train/NUMBER_00075
7184 SMALL/train/SMALL_00671
7184 THOUSANDS/train/THOUSANDS_00662
7184 MANCHESTER/train/MANCHESTER_00740
7184 AGREE/train/AGREE_00528
7184 RESPONSE/val/RESPONSE_00012
7184 BECOME/train/BECOME_00553
7184 FINANCIAL/train/FINANCIAL_00082
7184 EXTRA/train/EXTRA_00088
7184 STATES/train/STATES_00787
7184 DECIDED/test/DECIDED_00037
7184 GREECE/train/GREECE_00199
7184 BRITAIN/val/BRITAIN_00047
7184 REPORT/train/REPORT_00535
7184 MISSING/val/MISSING_00011
7184 OFFICERS/train/OFFICERS_00823
7184 LEAST/train/LEAST_00612
7184 CHIEF/train/CHIEF_00538
7184 SINCE/train/SINCE_00416
7184 COMING/train/COMING_00547
7184 SERVICE/train/SERVICE_00871
7184 MEASURES/train/MEASURES_00682
7184 MINUTES/train/MINUTES_00934
7184 BILLION/train/BILLION_00856
7184 REPORT/train/REPORT_00220
7184 HUNDREDS/train/HUNDREDS_00587
7184 SCOTTISH/train/SCOTTISH_00454
7184 LIVES/train/LIVES_00596
7184 GUILTY/train/GUILTY_00101
7184 SINCE/train/SINCE_00458
7184 PATIENTS/train/PATIENTS_00202
7184 FURTHER/train/FURTHER_00507
7184 CANCER/train/CANCER_00378
7184 FOUND/train/FOUND_00357
7184 STATES/train/STATES_00278
7184 CAMPAIGN/train/CAMPAIGN_00821
7184 LATEST/train/LATEST_00931
7184 HEAVY/train/HEAVY_00321
7184 PRESIDENT/train/PRESIDENT_00751
7184 SYRIA/test/SYRIA_00017
7184 OUTSIDE/train/OUTSIDE_00831
7184 MILLION/train/MILLION_00280
7184 THEIR/train/THEIR_00791
7184 GROUP/train/GROUP_00635
7184 DETAILS/val/DETAILS_00002
7184 EDUCATION/train/EDUCATION_00990
7184 CLOSE/test/CLOSE_00045
7184 CALLED/train/CALLED_00075
7184 SOCIETY/train/SOCIETY_00673
7184 THOUSANDS/train/THOUSANDS_00149
7184 SERVICE/train/SERVICE_00162
7184 STORY/train/STORY_00862
7184 HISTORY/train/HISTORY_00987
7184 LEVELS/train/LEVELS_00047
7184 DAVID/train/DAVID_00603
7184 CHILD/train/CHILD_00243
7184 INQUIRY/train/INQUIRY_00004
7184 EXAMPLE/train/EXAMPLE_00128
7184 SYRIAN/test/SYRIAN_00045
7184 WARNING/train/WARNING_00697
7184 WARNING/train/WARNING_00026
7184 SOCIAL/train/SOCIAL_00096
7184 ENGLAND/train/ENGLAND_00860
7184 LABOUR/train/LABOUR_00385
7184 ISLAMIC/test/ISLAMIC_00043
7184 PRESIDENT/train/PRESIDENT_00629
7184 AGAINST/train/AGAINST_00656
7184 CONFERENCE/val/CONFERENCE_00009
7184 CONCERNS/val/CONCERNS_00016
7184 EVIDENCE/train/EVIDENCE_00498
7184 EDUCATION/train/EDUCATION_00891
7184 PRISON/val/PRISON_00016
7184 AFFECTED/train/AFFECTED_00055
7184 YOUNG/train/YOUNG_00692
7184 WAITING/train/WAITING_00351
7184 FACING/train/FACING_00410
7184 WORST/train/WORST_00746
7184 GIVEN/train/GIVEN_00973
7184 YESTERDAY/test/YESTERDAY_00017
7184 ELECTION/train/ELECTION_00903
7184 MILLION/train/MILLION_00750
7184 WOMEN/val/WOMEN_00019
7184 ACCUSED/train/ACCUSED_00736
7184 ISLAMIC/train/ISLAMIC_00157
7184 GOING/train/GOING_00228
7184 SCOTTISH/train/SCOTTISH_00701
7184 SERIES/train/SERIES_00086
7184 GIVEN/test/GIVEN_00040
7184 TRIAL/train/TRIAL_00952
7184 COUNCIL/train/COUNCIL_00646
7184 USING/train/USING_00362
7184 NIGHT/train/NIGHT_00662
7184 HAPPENING/val/HAPPENING_00027
7184 PLACES/train/PLACES_00620
7184 MINUTES/train/MINUTES_00848
7184 PROBLEM/test/PROBLEM_00023
7184 SUPPORT/train/SUPPORT_00243
7184 THOUSANDS/test/THOUSANDS_00009
7184 THOUSANDS/train/THOUSANDS_00432
7184 WEATHER/train/WEATHER_00548
7184 OTHER/train/OTHER_00278
7184 KNOWN/train/KNOWN_00456
7184 OFFICERS/val/OFFICERS_00019
7184 PRIVATE/train/PRIVATE_00861
7184 INCREASE/train/INCREASE_00642
7184 BRITAIN/train/BRITAIN_00195
7184 INQUIRY/test/INQUIRY_00024
7184 MONTH/train/MONTH_00756
7184 LEAST/val/LEAST_00015
7184 FOLLOWING/train/FOLLOWING_00108
7184 OUTSIDE/train/OUTSIDE_00251
7184 STAFF/train/STAFF_00618
7184 WELFARE/test/WELFARE_00040
7184 MURDER/train/MURDER_00454
7184 LEAVE/test/LEAVE_00029
7184 COMING/train/COMING_00532
7184 EASTERN/train/EASTERN_00083
7184 EVENTS/train/EVENTS_00406
7184 LEAST/train/LEAST_00370
7184 TIMES/train/TIMES_00364
7184 BEING/train/BEING_00764
7184 EXPECT/train/EXPECT_00618
7184 SINCE/train/SINCE_00664
7184 INVESTMENT/train/INVESTMENT_00215
7184 DOING/train/DOING_00784
7184 AFRICA/train/AFRICA_00248
7184 CHALLENGE/train/CHALLENGE_00750
7184 THEIR/train/THEIR_00296
7184 DESCRIBED/train/DESCRIBED_00395
7184 CHILDREN/train/CHILDREN_00426
7184 GERMANY/test/GERMANY_00016
7184 GOVERNMENT/val/GOVERNMENT_00007
7184 DOING/val/DOING_00027
7184 TALKS/train/TALKS_00380
7184 EUROPE/train/EUROPE_00924
7184 ATTACK/val/ATTACK_00033
7184 BUILD/train/BUILD_00161
7184 LONDON/val/LONDON_00005
7184 EARLY/train/EARLY_00290
7184 SOCIETY/test/SOCIETY_00018
7184 CHALLENGE/train/CHALLENGE_00256
7184 SCOTTISH/train/SCOTTISH_00529
7184 PHONE/val/PHONE_00050
7184 REPORT/train/REPORT_00607
7184 TRYING/train/TRYING_00661
7184 DIFFICULT/train/DIFFICULT_00710
7184 SERVICES/train/SERVICES_00790
7184 FOLLOWING/train/FOLLOWING_00139
7184 ACCUSED/train/ACCUSED_00328
7184 WOULD/train/WOULD_00610
7184 RECENT/train/RECENT_00138
7184 RATES/train/RATES_00778
7184 SINCE/train/SINCE_00848
7184 CAMPAIGN/train/CAMPAIGN_00438
7184 DECIDED/val/DECIDED_00027
7184 WORST/train/WORST_00007
7184 SPECIAL/train/SPECIAL_00641
7184 OFFICERS/test/OFFICERS_00039
7184 GERMANY/train/GERMANY_00045
7184 PATIENTS/train/PATIENTS_00951
7184 EUROPEAN/train/EUROPEAN_00718
7184 UNION/val/UNION_00013
7184 WORLD/train/WORLD_00239
7184 INDEPENDENT/train/INDEPENDENT_00459
7184 CENTRAL/train/CENTRAL_00443
7184 START/train/START_00987
7184 MEMBER/train/MEMBER_00011
7184 TALKS/train/TALKS_00989
7184 PARENTS/train/PARENTS_00781
7184 RATES/train/RATES_00603
7184 PLACE/val/PLACE_00021
7184 TODAY/train/TODAY_00074
7184 PEOPLE/val/PEOPLE_00022
7184 SPEECH/val/SPEECH_00023
7184 GEORGE/train/GEORGE_00519
7184 EMERGENCY/train/EMERGENCY_00716
7184 DESCRIBED/train/DESCRIBED_00299
7184 TAKING/train/TAKING_00687
7184 JUDGE/train/JUDGE_00642
7184 COUNCIL/test/COUNCIL_00036
7184 OFFICIALS/train/OFFICIALS_00559
7184 IMPORTANT/train/IMPORTANT_00528
7184 AFTER/train/AFTER_00462
7184 PROCESS/train/PROCESS_00991
7184 ABUSE/train/ABUSE_00408
7184 ENERGY/train/ENERGY_00829
7184 MAJOR/test/MAJOR_00024
7184 HOSPITAL/train/HOSPITAL_00158
7184 WOMEN/train/WOMEN_00263
7184 DECISION/train/DECISION_00086
7184 LEADER/val/LEADER_00017
7184 KILLED/train/KILLED_00577
7184 STORY/test/STORY_00017
7184 DECISION/train/DECISION_00219
7184 OPERATION/test/OPERATION_00043
7184 WHERE/train/WHERE_00080
7184 MORNING/train/MORNING_00124
7184 REFERENDUM/train/REFERENDUM_01000
7184 WORDS/train/WORDS_00525
7184 OFFICE/val/OFFICE_00007
7184 HOURS/train/HOURS_00022
7184 ACCORDING/train/ACCORDING_00218
7184 PRISON/train/PRISON_00480
7184 LONDON/val/LONDON_00016
7184 CHANGES/test/CHANGES_00041
7184 BRITISH/val/BRITISH_00048
7184 LEAVE/train/LEAVE_00596
7184 PEOPLE/test/PEOPLE_00025
7184 TALKS/train/TALKS_00680
7184 FORCE/train/FORCE_00947
7184 GLOBAL/train/GLOBAL_00306
7184 REMEMBER/train/REMEMBER_00964
7184 AFTER/train/AFTER_00414
7184 TAKEN/test/TAKEN_00025
7184 PHONE/val/PHONE_00001
7184 IMMIGRATION/train/IMMIGRATION_00520
7184 WEATHER/train/WEATHER_00780
7184 EXTRA/val/EXTRA_00032
7184 INDEPENDENT/train/INDEPENDENT_00393
7184 SHOULD/train/SHOULD_00264
7184 AFFAIRS/train/AFFAIRS_00804
7184 SERIOUS/val/SERIOUS_00029
7184 BELIEVE/train/BELIEVE_00891
7184 ACTUALLY/test/ACTUALLY_00015
7184 CANCER/train/CANCER_00810
7184 OBAMA/train/OBAMA_00676
7184 MINISTER/train/MINISTER_00856
7184 SENIOR/train/SENIOR_00655
7184 HEAVY/train/HEAVY_00641
7184 AGREE/train/AGREE_00980
7184 SPEECH/train/SPEECH_00156
7184 EXPECT/train/EXPECT_00409
7184 THEIR/train/THEIR_00192
7184 EXACTLY/train/EXACTLY_00158
7184 RUSSIAN/test/RUSSIAN_00030
7184 HEART/train/HEART_00488
7184 COMPANIES/train/COMPANIES_00462
7184 PRESSURE/train/PRESSURE_00559
7184 DESCRIBED/val/DESCRIBED_00010
7184 RESPONSE/train/RESPONSE_00430
7184 ANNOUNCED/train/ANNOUNCED_00112
7184 SYRIA/train/SYRIA_00829
7184 COULD/train/COULD_00539
7184 THOUSANDS/val/THOUSANDS_00002
7184 MONTHS/test/MONTHS_00003
7184 CONTROL/train/CONTROL_00791
7184 COMMUNITY/test/COMMUNITY_00041
7184 POLICE/train/POLICE_00760
7184 CUSTOMERS/train/CUSTOMERS_00371
7184 ALLEGATIONS/train/ALLEGATIONS_00813
7184 CHARGE/train/CHARGE_00548
7184 ACCORDING/train/ACCORDING_00291
7184 POWER/train/POWER_00192
7184 MARKET/train/MARKET_00273
7184 AREAS/train/AREAS_00040
7184 HEALTH/train/HEALTH_00536
7184 RIGHT/train/RIGHT_00111
7184 LATER/train/LATER_00649
7184 CONCERNS/train/CONCERNS_00507
7184 ALLOW/train/ALLOW_00105
7184 WELFARE/train/WELFARE_00433
7184 EXPECTED/train/EXPECTED_00216
7184 VICTIMS/train/VICTIMS_00007
7184 ALLEGATIONS/train/ALLEGATIONS_00758
7184 GROUP/train/GROUP_00157
7184 PLACES/train/PLACES_00166
7184 HOMES/val/HOMES_00026
7184 LIVING/val/LIVING_00033
7184 WELFARE/train/WELFARE_00623
7184 ACTION/train/ACTION_00241
7184 CALLED/train/CALLED_00429
7184 SEEMS/train/SEEMS_00270
7184 SPENDING/train/SPENDING_00664
7184 FRANCE/train/FRANCE_00061
7184 AFFECTED/train/AFFECTED_00320
7184 RECENT/train/RECENT_00695
7184 THOUSANDS/train/THOUSANDS_00676
7184 STORY/train/STORY_00475
7184 SEVERAL/train/SEVERAL_00716
7184 MINUTES/train/MINUTES_00894
7184 AFTER/train/AFTER_00660
7184 SPEAKING/train/SPEAKING_00016
7184 SENIOR/val/SENIOR_00049
7184 ALLEGATIONS/train/ALLEGATIONS_00037
7184 LIKELY/train/LIKELY_00663
7184 WORKERS/train/WORKERS_00675
7184 CLAIMS/train/CLAIMS_00831
7184 TALKS/train/TALKS_00750
7184 LONGER/train/LONGER_00257
7184 OTHERS/val/OTHERS_00004
7184 LEADERSHIP/train/LEADERSHIP_00695
7184 NEVER/train/NEVER_00042
7184 EDUCATION/train/EDUCATION_00221
7184 CURRENT/train/CURRENT_00319
7184 SHORT/train/SHORT_00743
7184 YOUNG/train/YOUNG_00815
7184 ALMOST/val/ALMOST_00014
7184 GETTING/train/GETTING_00538
7184 CUSTOMERS/train/CUSTOMERS_00613
7184 ALLEGATIONS/train/ALLEGATIONS_00294
7184 GIVING/val/GIVING_00005
7184 AFFAIRS/train/AFFAIRS_00185
7184 PRIME/train/PRIME_00313
7184 GLOBAL/val/GLOBAL_00017
7184 THOSE/train/THOSE_00700
7184 BRITISH/train/BRITISH_00813
7184 SPENT/train/SPENT_00437
7184 SECRETARY/val/SECRETARY_00021
7184 MORNING/val/MORNING_00030
7184 ECONOMY/train/ECONOMY_00611
7184 SECTOR/val/SECTOR_00037
7184 OTHERS/train/OTHERS_00183
7184 BRITISH/train/BRITISH_00753
7184 GIVEN/train/GIVEN_00479
7184 AHEAD/train/AHEAD_00048
7184 COULD/train/COULD_00074
7184 MILLIONS/train/MILLIONS_00408
7184 LEGAL/train/LEGAL_00585
7184 INQUIRY/train/INQUIRY_00418
7184 ACCORDING/train/ACCORDING_00024
7184 BENEFIT/test/BENEFIT_00045
7184 LIKELY/train/LIKELY_00613
7184 CHANGES/test/CHANGES_00013
7184 REPORT/train/REPORT_00606
7184 SUNDAY/train/SUNDAY_00131
7184 EMERGENCY/train/EMERGENCY_00142
7184 AFFAIRS/train/AFFAIRS_00690
7184 LATER/train/LATER_00653
7184 CONSERVATIVE/train/CONSERVATIVE_00328
7184 LIVES/train/LIVES_00043
7184 AGAINST/train/AGAINST_00899
7184 SEVEN/train/SEVEN_00502
7184 RUNNING/train/RUNNING_00735
7184 BROUGHT/train/BROUGHT_00022
7184 INQUIRY/train/INQUIRY_00303
7184 PRIVATE/val/PRIVATE_00047
7184 JUSTICE/test/JUSTICE_00047
7184 UNTIL/train/UNTIL_00788
7184 GROUP/train/GROUP_00377
7184 EUROPEAN/train/EUROPEAN_00617
7184 STAGE/train/STAGE_00606
7184 PERIOD/train/PERIOD_00006
7184 PRISON/train/PRISON_00545
7184 CONFERENCE/train/CONFERENCE_00445
7184 ISSUES/train/ISSUES_00755
7184 ATTACKS/train/ATTACKS_00768
7184 CANCER/train/CANCER_00474
7184 AFFAIRS/train/AFFAIRS_00245
7184 WEATHER/train/WEATHER_00368
7184 SINGLE/val/SINGLE_00022
7184 CHALLENGE/test/CHALLENGE_00011
7184 MORNING/train/MORNING_00147
7184 AMONG/train/AMONG_00580
7184 ENERGY/train/ENERGY_00393
7184 RIGHT/train/RIGHT_00097
7184 CHIEF/val/CHIEF_00044
7184 GROWING/train/GROWING_00317
7184 CENTRAL/train/CENTRAL_00666
7184 MAJORITY/train/MAJORITY_00629
7184 MILLIONS/train/MILLIONS_00761
7184 ALLOW/train/ALLOW_00351
7184 PLANS/train/PLANS_00148
7184 RATES/val/RATES_00042
7184 WATER/train/WATER_00082
7184 LIVES/train/LIVES_00850
7184 GROUP/test/GROUP_00039
7184 CONCERNS/train/CONCERNS_00322
7184 PARTS/train/PARTS_00566
7184 STRONG/test/STRONG_00024
7184 MARKET/train/MARKET_00254
7184 WEATHER/train/WEATHER_00391
7184 PATIENTS/train/PATIENTS_00986
7184 THREE/val/THREE_00011
7184 MORNING/train/MORNING_00165
7184 CHILD/train/CHILD_00877
7184 BEFORE/train/BEFORE_00985
7184 TODAY/train/TODAY_00297
7184 HEALTH/train/HEALTH_00251
7184 WEEKS/train/WEEKS_00309
7184 MONTHS/train/MONTHS_00097
7184 LEAVE/train/LEAVE_00961
7184 PRISON/train/PRISON_00255
7184 INCREASE/test/INCREASE_00016
7184 ASKING/train/ASKING_00739
7184 SEVERAL/train/SEVERAL_00221
7184 COMING/train/COMING_00591
7184 THOUGHT/val/THOUGHT_00025
7184 OPPOSITION/train/OPPOSITION_00268
7184 USING/train/USING_00776
7184 THREE/train/THREE_00935
7184 SENSE/val/SENSE_00029
7184 DEFICIT/train/DEFICIT_00651
7184 NATIONAL/train/NATIONAL_00957
7184 REPORTS/train/REPORTS_00233
7184 TRYING/train/TRYING_00730
7184 WORKERS/train/WORKERS_00179
7184 THOUSANDS/train/THOUSANDS_00472
7184 AFFAIRS/train/AFFAIRS_00211
7184 CONFERENCE/val/CONFERENCE_00018
7184 HUNDREDS/train/HUNDREDS_00869
7184 MINUTES/train/MINUTES_00580
7184 RETURN/val/RETURN_00029
7184 MINUTES/train/MINUTES_00989
7184 MILITARY/train/MILITARY_00523
7184 EXPECTED/train/EXPECTED_00409
7184 INDUSTRY/train/INDUSTRY_00998
7184 THREE/train/THREE_00479
7184 AREAS/train/AREAS_00791
7184 MESSAGE/train/MESSAGE_00829
7184 GIVEN/train/GIVEN_00697
7184 NIGHT/train/NIGHT_00893
7184 SERVICE/train/SERVICE_00004
7184 FRIDAY/test/FRIDAY_00018
7184 WITHIN/train/WITHIN_00677
7184 WHILE/train/WHILE_00402
7184 QUESTION/train/QUESTION_00319
7184 THEIR/val/THEIR_00031
7184 INFORMATION/val/INFORMATION_00002
7184 ENGLAND/val/ENGLAND_00004
7184 MURDER/train/MURDER_00980
7184 FIGURES/train/FIGURES_00463
7184 SECOND/val/SECOND_00033
7184 RATES/train/RATES_00082
7184 LEAVE/train/LEAVE_00023
7184 PATIENTS/train/PATIENTS_00332
7184 SPECIAL/train/SPECIAL_00929
7184 ALLOWED/train/ALLOWED_00044
7184 MISSING/train/MISSING_00025
7184 ACTION/test/ACTION_00025
7184 SEVERAL/train/SEVERAL_00432
7184 INCREASE/train/INCREASE_00018
7184 MEETING/train/MEETING_00635
7184 PARLIAMENT/train/PARLIAMENT_00142
7184 SECURITY/train/SECURITY_00380
7184 LATEST/train/LATEST_00002
7184 SITUATION/train/SITUATION_00982
7184 PRIVATE/train/PRIVATE_00678
7184 ABUSE/train/ABUSE_00829
7184 GROUP/test/GROUP_00004
7184 MISSING/train/MISSING_00677
7184 CHANGE/train/CHANGE_00202
7184 CHARGES/train/CHARGES_00003
7184 TALKS/train/TALKS_00165
7184 AGREEMENT/train/AGREEMENT_00565
7184 FIRST/train/FIRST_00468
7184 SPENT/train/SPENT_00255
7184 MATTER/train/MATTER_00646
7184 TODAY/train/TODAY_00093
7184 MINISTERS/train/MINISTERS_00112
7184 STREET/train/STREET_00764
7184 THROUGH/train/THROUGH_00792
7184 SPENDING/train/SPENDING_00954
7184 THOUSANDS/train/THOUSANDS_00088
7184 CANCER/val/CANCER_00044
7184 HAPPENING/train/HAPPENING_00146
7184 AUTHORITIES/train/AUTHORITIES_00811
7184 SINCE/train/SINCE_00863
7184 ABUSE/train/ABUSE_00289
7184 PROVIDE/test/PROVIDE_00044
7184 FOLLOWING/train/FOLLOWING_00811
7184 WORKING/train/WORKING_00187
7184 CHILD/train/CHILD_00635
7184 COMES/train/COMES_00637
7184 ABUSE/val/ABUSE_00015
7184 SECOND/val/SECOND_00024
7184 MAJOR/train/MAJOR_00223
7184 SPEECH/test/SPEECH_00037
7184 LIKELY/train/LIKELY_00034
7184 FIRST/train/FIRST_00522
7184 MEASURES/train/MEASURES_00550
7184 ACCORDING/train/ACCORDING_00617
7184 COMPANY/train/COMPANY_00023
7184 CLAIMS/val/CLAIMS_00009
7184 LATER/train/LATER_00140
7184 HEALTH/train/HEALTH_00964
7184 FRIDAY/train/FRIDAY_00256
7184 MONTH/train/MONTH_00466
7184 BEHIND/train/BEHIND_00933
7184 CALLED/train/CALLED_00416
7184 AMONG/val/AMONG_00038
7184 SPENDING/train/SPENDING_00645
7184 WORST/train/WORST_00596
7184 COUNCIL/train/COUNCIL_00085
7184 ATTACKS/val/ATTACKS_00037
7184 INDUSTRY/test/INDUSTRY_00002
7184 PATIENTS/train/PATIENTS_00403
7184 PLACES/train/PLACES_00010
7184 BROUGHT/train/BROUGHT_00926
7184 WARNING/train/WARNING_00594
7184 SINCE/train/SINCE_00803
7184 START/val/START_00003
7184 CHILDREN/train/CHILDREN_00853
7184 ACCUSED/train/ACCUSED_00840
7184 MORNING/train/MORNING_00836
7184 RETURN/test/RETURN_00048
7184 FRENCH/train/FRENCH_00309
7184 VOTERS/train/VOTERS_00890
7184 LEADERS/train/LEADERS_00919
7184 WATER/val/WATER_00037
7184 SPEAKING/val/SPEAKING_00022
7184 PRIVATE/train/PRIVATE_00665
7184 EMERGENCY/train/EMERGENCY_00241
7184 RUNNING/train/RUNNING_00649
7184 OPPOSITION/train/OPPOSITION_00422
7184 WELCOME/train/WELCOME_00275
7184 LEADER/train/LEADER_00760
7184 WARNING/train/WARNING_00095
7184 LOOKING/train/LOOKING_00221
7184 SOCIAL/train/SOCIAL_00051
7184 MEMBERS/train/MEMBERS_00563
7184 MAJOR/train/MAJOR_00650
7184 REMEMBER/val/REMEMBER_00005
7184 CHANCE/train/CHANCE_00523
7184 CHILDREN/test/CHILDREN_00050
7184 IMMIGRATION/train/IMMIGRATION_00573
7184 WATER/train/WATER_00766
7184 CHILD/train/CHILD_00952
7184 ECONOMIC/train/ECONOMIC_00694
7184 CHANGE/train/CHANGE_00449
7184 PROCESS/train/PROCESS_00756
7184 HISTORY/val/HISTORY_00042
7184 UNION/val/UNION_00024
7184 LEADERS/train/LEADERS_00316
7184 EVENING/train/EVENING_00383
7184 LIVING/train/LIVING_00492
7184 ISLAMIC/train/ISLAMIC_00214
7184 LOCAL/train/LOCAL_00365
7184 SPEND/train/SPEND_00141
7184 ASKED/train/ASKED_00059
7184 AHEAD/test/AHEAD_00034
7184 CONSERVATIVE/train/CONSERVATIVE_00355
7184 JUSTICE/train/JUSTICE_00558
7184 THOSE/val/THOSE_00043
7184 EXAMPLE/train/EXAMPLE_00785
7184 CAPITAL/train/CAPITAL_00355
7184 THIRD/val/THIRD_00027
7184 FOUND/train/FOUND_00776
7184 LATEST/train/LATEST_00580
7184 LATER/train/LATER_00871
7184 SOCIETY/train/SOCIETY_00754
7184 EMERGENCY/train/EMERGENCY_00183
7184 NORTHERN/train/NORTHERN_00226
7184 AGAINST/train/AGAINST_00217
7184 PHONE/val/PHONE_00017
7184 FIRST/test/FIRST_00025
7184 BUSINESS/train/BUSINESS_00002
7184 GUILTY/test/GUILTY_00035
7184 JUSTICE/train/JUSTICE_00432
7184 SPECIAL/train/SPECIAL_00715
7184 SENIOR/train/SENIOR_00757
7184 KNOWN/train/KNOWN_00940
7184 MINISTER/train/MINISTER_00664
7184 MIGRANTS/train/MIGRANTS_00877
7184 FORCES/train/FORCES_00903
7184 DESPITE/train/DESPITE_00994
7184 LEVEL/train/LEVEL_00033
7184 KILLED/val/KILLED_00009
7184 AMERICA/test/AMERICA_00015
7184 LARGE/train/LARGE_00927
7184 MISSING/test/MISSING_00013
7184 KNOWN/train/KNOWN_00364
7184 MURDER/train/MURDER_00680
7184 ISSUE/train/ISSUE_00832
7184 FOUND/train/FOUND_00714
7184 OUTSIDE/train/OUTSIDE_00412
7184 TODAY/train/TODAY_00239
7184 AGAIN/train/AGAIN_00809
7184 NORTH/train/NORTH_00842
7184 WEEKEND/test/WEEKEND_00042
7184 MAJOR/train/MAJOR_00273
7184 DESCRIBED/test/DESCRIBED_00034
7184 FORMER/train/FORMER_00385
7184 WEATHER/train/WEATHER_00529
7184 CRIME/val/CRIME_00020
7184 SYRIA/train/SYRIA_00183
7184 PLANS/val/PLANS_00046
7184 ARRESTED/train/ARRESTED_00415
7184 LEADER/train/LEADER_00074
7184 PLACES/train/PLACES_00444
7184 LONGER/train/LONGER_00095
7184 FINANCIAL/test/FINANCIAL_00019
7184 CHIEF/test/CHIEF_00023
7184 CALLED/train/CALLED_00099
7184 HOSPITAL/val/HOSPITAL_00023
7184 REPORTS/train/REPORTS_00474
7184 LIKELY/train/LIKELY_00573
7184 SPEAKING/train/SPEAKING_00675
7184 RECENT/train/RECENT_00130
7184 LEADERS/train/LEADERS_00727
7184 IMPACT/train/IMPACT_00018
7184 GOVERNMENT/train/GOVERNMENT_00597
7184 SCOTLAND/train/SCOTLAND_00227
7184 BENEFIT/train/BENEFIT_00662
7184 WINDS/train/WINDS_00809
7184 COULD/train/COULD_00307
7184 LATEST/train/LATEST_00943
7184 INFORMATION/train/INFORMATION_00504
7184 CUSTOMERS/train/CUSTOMERS_00816
7184 ATTACK/train/ATTACK_00335
7184 AMERICAN/test/AMERICAN_00046
7184 BRITAIN/train/BRITAIN_00784
7184 BROUGHT/train/BROUGHT_00326
7184 SEEMS/train/SEEMS_00849
7184 AROUND/train/AROUND_00257
7184 DOING/train/DOING_00285
7184 THREAT/train/THREAT_00970
7184 LEVELS/train/LEVELS_00868
7184 TALKS/train/TALKS_00693
7184 LOCAL/train/LOCAL_00180
7184 FIRST/train/FIRST_00701
7184 TALKS/train/TALKS_00033
7184 DESCRIBED/train/DESCRIBED_00388
7184 MINUTES/train/MINUTES_00776
7184 IMPACT/train/IMPACT_00942
7184 LIVES/train/LIVES_00215
7184 DURING/test/DURING_00013
7184 CONTROL/train/CONTROL_00745
7184 ACCORDING/train/ACCORDING_00445
7184 CHILD/val/CHILD_00038
7184 MAJOR/test/MAJOR_00043
7184 LATEST/train/LATEST_00815
7184 AMOUNT/train/AMOUNT_00291
7184 GIVEN/test/GIVEN_00005
7184 ACCESS/train/ACCESS_00048
7184 INDEPENDENT/train/INDEPENDENT_00640
7184 LIVING/train/LIVING_00437
7184 USING/train/USING_00356
7184 JUSTICE/train/JUSTICE_00520
7184 PARENTS/train/PARENTS_00137
7184 CAMPAIGN/train/CAMPAIGN_00926
7184 AFFAIRS/val/AFFAIRS_00019
7184 WAITING/train/WAITING_00671
7184 MEDICAL/train/MEDICAL_00302
7184 SOCIAL/train/SOCIAL_00930
7184 EASTERN/train/EASTERN_00332
7184 DURING/val/DURING_00030
7184 STAGE/train/STAGE_00707
7184 NIGHT/train/NIGHT_00751
7184 UNITED/train/UNITED_00728
7184 PHONE/train/PHONE_00304
7184 EXPECTED/train/EXPECTED_00741
7184 LATER/train/LATER_00307
7184 MINISTERS/val/MINISTERS_00010
7184 LIVES/train/LIVES_00761
7184 MORNING/train/MORNING_00680
7184 CRIME/train/CRIME_00418
7184 SERIES/train/SERIES_00447
7184 NORTH/train/NORTH_00091
7184 SERVICES/train/SERVICES_00514
7184 SINCE/train/SINCE_00898
7184 TODAY/train/TODAY_00336
7184 PLANS/train/PLANS_00093
7184 PARENTS/train/PARENTS_00316
7184 BUSINESSES/val/BUSINESSES_00013
7184 SINCE/train/SINCE_00031
7184 SOCIAL/train/SOCIAL_00735
7184 AROUND/train/AROUND_00394
7184 AFFECTED/train/AFFECTED_00284
7184 BECAUSE/train/BECAUSE_00914
7184 PUBLIC/val/PUBLIC_00017
7184 INSIDE/train/INSIDE_00193
7184 WINDS/train/WINDS_00216
7184 USING/train/USING_00811
7184 ANNOUNCED/val/ANNOUNCED_00041
7184 PRISON/train/PRISON_00916
7184 RETURN/train/RETURN_00709
7184 HEALTH/val/HEALTH_00033
7184 CURRENT/train/CURRENT_00457
7184 DETAILS/train/DETAILS_00726
7184 TRIAL/train/TRIAL_00628
7184 OFFICE/train/OFFICE_00951
7184 UNION/train/UNION_00277
7184 AGREEMENT/train/AGREEMENT_00383
7184 COMPANIES/train/COMPANIES_00029
7184 SERIOUS/test/SERIOUS_00032
7184 CHANGES/test/CHANGES_00017
7184 EDUCATION/train/EDUCATION_00665
7184 BILLION/train/BILLION_00276
7184 AFRICA/train/AFRICA_00768
7184 STAFF/train/STAFF_00629
7184 TIMES/train/TIMES_00287
7184 CHILDREN/val/CHILDREN_00050
7184 DETAILS/train/DETAILS_00970
7184 RECORD/train/RECORD_00122
7184 POLITICAL/train/POLITICAL_00415
7184 SOMEONE/train/SOMEONE_00030
7184 THIRD/train/THIRD_00435
7184 WEATHER/train/WEATHER_00053
7184 NORTHERN/train/NORTHERN_00217
7184 OFFICIALS/train/OFFICIALS_00286
7184 ISSUE/val/ISSUE_00003
7184 CASES/train/CASES_00526
7184 EXPECTED/train/EXPECTED_00496
7184 WORST/train/WORST_00622
7184 AGREEMENT/train/AGREEMENT_00766
7184 DECIDED/train/DECIDED_00542
7184 WEATHER/train/WEATHER_00191
7184 WALES/train/WALES_00097
7184 RULES/train/RULES_00494
7184 BETTER/train/BETTER_00703
7184 WEATHER/train/WEATHER_00167
7184 POSSIBLE/val/POSSIBLE_00028
7184 BILLION/train/BILLION_00036
7184 AFTERNOON/train/AFTERNOON_00604
7184 WEEKS/train/WEEKS_00634
7184 INQUIRY/train/INQUIRY_00099
7184 EDUCATION/val/EDUCATION_00004
9335 LATEST/train/LATEST_00168
9335 TRUST/val/TRUST_00039
9335 ITSELF/train/ITSELF_00838
9335 FUTURE/train/FUTURE_00189
9335 FORWARD/train/FORWARD_00188
9335 LEADERS/train/LEADERS_00777
9335 INDEPENDENT/train/INDEPENDENT_00070
9335 CHANCE/train/CHANCE_00207
9335 WORDS/train/WORDS_00670
9335 UNION/train/UNION_00271
9335 BUILD/train/BUILD_00741
9335 MOVING/train/MOVING_00119
9335 LITTLE/train/LITTLE_00563
9335 ECONOMIC/train/ECONOMIC_00571
9335 ALLOWED/train/ALLOWED_00733
9335 PLANS/train/PLANS_00818
9335 MEDIA/train/MEDIA_00435
9335 AREAS/train/AREAS_00135
9335 INFLATION/train/INFLATION_00107
9335 WORDS/train/WORDS_00502
9335 TAKING/train/TAKING_00525
9335 SERVICES/train/SERVICES_00282
9335 PHONE/train/PHONE_00195
9335 CALLED/val/CALLED_00047
9335 REPORT/train/REPORT_00449
9335 EVERYONE/train/EVERYONE_00774
9335 GROWTH/train/GROWTH_00832
9335 INDEPENDENT/train/INDEPENDENT_00031
9335 DEBATE/train/DEBATE_00296
9335 LONDON/train/LONDON_00439
9335 MIGHT/train/MIGHT_00315
9335 LIKELY/train/LIKELY_00723
9335 LONDON/train/LONDON_00773
9335 HOURS/train/HOURS_00372
9335 THREE/train/THREE_00764
9335 INFLATION/train/INFLATION_00596
9335 RESPONSE/train/RESPONSE_00085
9335 MESSAGE/train/MESSAGE_00654
9335 CRISIS/train/CRISIS_00171
9335 DIFFICULT/train/DIFFICULT_00497
9335 AUTHORITIES/train/AUTHORITIES_00936
9335 STAFF/train/STAFF_00326
9335 DIFFERENCE/train/DIFFERENCE_00127
9335 OFFICE/train/OFFICE_00516
9335 BUDGET/train/BUDGET_00313
9335 NUMBER/train/NUMBER_00558
9335 PRIVATE/train/PRIVATE_00613
9335 EVENTS/train/EVENTS_00833
9335 INTEREST/train/INTEREST_00668
9335 WEEKS/train/WEEKS_00790
9335 MESSAGE/train/MESSAGE_00019
9335 MESSAGE/train/MESSAGE_00412
9335 PATIENTS/test/PATIENTS_00034
9335 DEBATE/train/DEBATE_00322
9335 INVESTMENT/train/INVESTMENT_00392
9335 WORST/train/WORST_00486
9335 SPEND/train/SPEND_00074
9335 SECTOR/train/SECTOR_00845
9335 THESE/train/THESE_00095
9335 EXAMPLE/train/EXAMPLE_00047
9335 AREAS/train/AREAS_00677
9335 PUBLIC/train/PUBLIC_00394
9335 ITSELF/train/ITSELF_00674
9335 SECTOR/train/SECTOR_00703
9335 INFLATION/train/INFLATION_00357
9335 MONEY/train/MONEY_00792
9335 INDUSTRY/train/INDUSTRY_00258
9335 PRICE/train/PRICE_00150
9335 FIRST/test/FIRST_00011
9335 WEEKS/train/WEEKS_00047
9335 WORST/val/WORST_00005
9335 MORNING/train/MORNING_00777
9335 PRICES/train/PRICES_00344
9335 RATES/train/RATES_00464
9335 AFFECTED/train/AFFECTED_00478
9335 INVESTMENT/train/INVESTMENT_00220
9335 RATES/train/RATES_00849
9335 LIVING/train/LIVING_00370
9335 PARTS/train/PARTS_00027
9335 ACCESS/train/ACCESS_00809
9335 REALLY/train/REALLY_00574
9335 FINANCIAL/train/FINANCIAL_00216
9335 PUBLIC/train/PUBLIC_00096
9335 PRICE/train/PRICE_00525
9335 INCREASE/train/INCREASE_00772
9335 STILL/val/STILL_00006
9335 MEDIA/train/MEDIA_00676
9335 PATIENTS/train/PATIENTS_00199
9335 MEDICAL/train/MEDICAL_00834
9335 YEARS/train/YEARS_00171
9335 BECOME/train/BECOME_00232
9335 INDEPENDENT/train/INDEPENDENT_00900
9335 BANKS/train/BANKS_00959
9335 GROWTH/train/GROWTH_00032
9335 CAMERON/train/CAMERON_00146
9335 PUBLIC/train/PUBLIC_00382
9335 WITHIN/train/WITHIN_00893
9335 LATEST/train/LATEST_00501
9335 INCREASE/train/INCREASE_00680
9335 INVOLVED/train/INVOLVED_00717
9335 THESE/train/THESE_00274
9335 MEDICAL/train/MEDICAL_00836
9335 PATIENTS/train/PATIENTS_00971
9335 WHETHER/val/WHETHER_00020
9335 PUBLIC/train/PUBLIC_00339
9335 BRITISH/train/BRITISH_00346
9335 FORWARD/train/FORWARD_00687
9335 RECENT/train/RECENT_00757
9335 INCREASE/train/INCREASE_00491
9335 CLEAR/train/CLEAR_00863
9335 SPENDING/val/SPENDING_00004
9335 LEAST/val/LEAST_00047
9335 OFFICE/train/OFFICE_00247
9335 HEALTH/train/HEALTH_00212
9335 REPORT/train/REPORT_00022
9335 PARTS/train/PARTS_00288
9335 PROVIDE/train/PROVIDE_00156
9335 COMPANY/train/COMPANY_00605
9335 SYSTEM/train/SYSTEM_00625
9335 AFFECTED/train/AFFECTED_00671
9335 CURRENT/val/CURRENT_00033
9335 LIVING/train/LIVING_00848
9335 TAKEN/train/TAKEN_00689
9335 RULES/train/RULES_00076
9335 FUTURE/train/FUTURE_00924
9335 SAYING/train/SAYING_00134
9335 STILL/train/STILL_00094
9335 HOSPITAL/val/HOSPITAL_00011
9335 FINAL/train/FINAL_00018
9335 BANKS/train/BANKS_00779
9335 MOMENT/train/MOMENT_00767
9335 COULD/train/COULD_00456
9335 RULES/train/RULES_00132
9335 CLOSE/train/CLOSE_00337
9335 EVERYTHING/train/EVERYTHING_00890
9335 MONEY/train/MONEY_00794
9335 BANKS/train/BANKS_00285
9335 SPEECH/train/SPEECH_00892
9335 UNDER/train/UNDER_00045
9335 SHORT/train/SHORT_00983
9335 SMALL/train/SMALL_00954
9335 YEARS/train/YEARS_00384
9335 AGREE/train/AGREE_00914
9335 AFRICA/train/AFRICA_00700
9335 INVESTMENT/train/INVESTMENT_00177
9335 YEARS/train/YEARS_00724
9335 MEDIA/train/MEDIA_00883
9335 WANTS/train/WANTS_00276
9335 SPEAKING/train/SPEAKING_00490
9335 INFLATION/train/INFLATION_00694
9335 MEDICAL/train/MEDICAL_00381
9335 RESULT/train/RESULT_00604
9335 SAYING/train/SAYING_00986
9335 SECOND/train/SECOND_00721
9335 FURTHER/train/FURTHER_00855
9335 PRICES/train/PRICES_00927
9335 THESE/train/THESE_00783
9335 COUPLE/train/COUPLE_00200
9335 SECURITY/train/SECURITY_00926
9335 EXPECTED/train/EXPECTED_00579
9335 WELCOME/train/WELCOME_00826
9335 COUPLE/train/COUPLE_00571
9335 PROCESS/train/PROCESS_00838
9335 MAJORITY/train/MAJORITY_00349
9335 PATIENTS/train/PATIENTS_00978
9335 INDEPENDENT/train/INDEPENDENT_00151
9335 SHOULD/train/SHOULD_00169
9335 WELFARE/train/WELFARE_00023
9335 WORKERS/train/WORKERS_00895
9335 ANYTHING/train/ANYTHING_00225
9335 ASKED/train/ASKED_00285
9335 SIDES/test/SIDES_00012
9335 INTEREST/train/INTEREST_00408
9335 INFLATION/train/INFLATION_00531
9335 PROBABLY/train/PROBABLY_00365
9335 INFLATION/train/INFLATION_00525
9335 BANKS/train/BANKS_00832
9335 LEVELS/train/LEVELS_00653
9335 THINGS/train/THINGS_00034
9335 RULES/train/RULES_00409
9335 THEIR/train/THEIR_00681
9335 MEETING/train/MEETING_00951
9335 NUMBERS/train/NUMBERS_00140
9335 GEORGE/train/GEORGE_00360
9335 MONEY/train/MONEY_00810
9335 CRISIS/train/CRISIS_00508
9335 LONGER/train/LONGER_00155
9335 INFLATION/train/INFLATION_00665
9335 FORWARD/train/FORWARD_00987
9335 LEVEL/train/LEVEL_00748
9335 OTHER/train/OTHER_00565
9335 STAGE/train/STAGE_00715
9335 AGAIN/train/AGAIN_00564
9335 LIVING/train/LIVING_00432
9335 CLEAR/train/CLEAR_00654
9335 HIGHER/train/HIGHER_00821
9335 GROWTH/train/GROWTH_00335
9335 TRUST/train/TRUST_00086
9335 BENEFIT/train/BENEFIT_00515
9335 INVOLVED/train/INVOLVED_00554
9335 POSSIBLE/train/POSSIBLE_00169
9335 BUSINESSES/train/BUSINESSES_00771
9335 NEEDS/val/NEEDS_00027
9335 ACCORDING/train/ACCORDING_00017
9335 SHORT/train/SHORT_00336
9335 PROCESS/train/PROCESS_00277
9335 SHORT/train/SHORT_00015
9335 RATHER/train/RATHER_00684
9335 SPENDING/train/SPENDING_00953
9335 THERE/train/THERE_00703
9335 ORDER/train/ORDER_00170
9335 LIVES/train/LIVES_00113
9335 JUDGE/train/JUDGE_00497
9335 SERIOUS/train/SERIOUS_00706
9335 COULD/test/COULD_00046
9335 SPEECH/train/SPEECH_00888
9335 RULES/train/RULES_00790
9335 ECONOMY/train/ECONOMY_00087
9335 HEARD/train/HEARD_00787
9335 FINANCIAL/train/FINANCIAL_00176
9335 MANCHESTER/train/MANCHESTER_00884
9335 HEALTH/val/HEALTH_00030
9335 RECENT/train/RECENT_00798
9335 THIRD/train/THIRD_00313
9335 PROBLEM/train/PROBLEM_00551
9335 LEGAL/train/LEGAL_00402
9335 EXPECT/train/EXPECT_00294
9335 TODAY/train/TODAY_00974
9335 MONTHS/train/MONTHS_00854
9335 STREET/train/STREET_00807
9335 ENOUGH/train/ENOUGH_00137
9335 BORDER/train/BORDER_00448
9335 WELCOME/train/WELCOME_00591
9335 MILLIONS/train/MILLIONS_00815
9335 FRANCE/train/FRANCE_00774
9335 INFLATION/train/INFLATION_00137
9335 RATES/train/RATES_00821
9335 PLANS/train/PLANS_00675
9335 HOUSE/train/HOUSE_00100
9335 GROWTH/train/GROWTH_00134
9335 THING/test/THING_00035
9335 EMERGENCY/val/EMERGENCY_00039
9335 HAVING/train/HAVING_00107
9335 MAKES/train/MAKES_00524
9335 WEEKEND/train/WEEKEND_00927
9335 EVENTS/train/EVENTS_00441
9335 STAFF/train/STAFF_00293
9335 AGREEMENT/train/AGREEMENT_00244
9335 FINANCIAL/train/FINANCIAL_00579
9335 SEVERAL/train/SEVERAL_00869
9335 PUBLIC/train/PUBLIC_00976
9335 ANYTHING/train/ANYTHING_00779
9335 BETTER/train/BETTER_00912
9335 MONTH/train/MONTH_00457
9335 BANKS/train/BANKS_00594
9335 BRING/train/BRING_00444
9335 CLEAR/train/CLEAR_00397
9335 AHEAD/train/AHEAD_00047
9335 ACCESS/train/ACCESS_00076
9335 LATER/train/LATER_00963
9335 AGREE/train/AGREE_00346
9335 NUMBERS/train/NUMBERS_00865
9335 GIVEN/train/GIVEN_00847
9335 ECONOMY/train/ECONOMY_00387
9335 DIFFERENT/train/DIFFERENT_00541
9335 NOTHING/train/NOTHING_00997
9335 IMPORTANT/train/IMPORTANT_00471
9335 BUDGET/train/BUDGET_00087
9335 SECTOR/train/SECTOR_00004
9335 DIFFERENT/train/DIFFERENT_00561
9335 RATES/train/RATES_00555
9335 THINGS/train/THINGS_00748
9335 AGREE/train/AGREE_00847
9335 UNDER/train/UNDER_00013
9335 WORST/train/WORST_00474
9335 COUNTRIES/train/COUNTRIES_00028
9335 CENTRAL/train/CENTRAL_00719
9335 RECENT/train/RECENT_00216
9335 QUITE/test/QUITE_00017
9335 IMPORTANT/train/IMPORTANT_00664
9335 YEARS/train/YEARS_00993
9335 BUDGET/train/BUDGET_00284
9335 LITTLE/train/LITTLE_00316
9335 INFLATION/train/INFLATION_00169
9335 MIGHT/train/MIGHT_00355
9335 WRONG/train/WRONG_00619
9335 WAITING/train/WAITING_00153
9335 BANKS/train/BANKS_00942
9335 MONTHS/train/MONTHS_00155
9335 MAJOR/train/MAJOR_00129
9335 MILLION/train/MILLION_00825
9335 AFFECTED/train/AFFECTED_00720
9335 RULES/train/RULES_00502
9335 RUNNING/train/RUNNING_00257
9335 PHONE/train/PHONE_00813
9335 INCREASE/train/INCREASE_00759
9335 PRIVATE/train/PRIVATE_00963
9335 RESPONSE/train/RESPONSE_00813
9335 STAFF/train/STAFF_00569
9335 DURING/train/DURING_00112
9335 KNOWN/train/KNOWN_00141
9335 NUMBER/train/NUMBER_00098
9335 AFFECTED/train/AFFECTED_00340
9335 INTEREST/train/INTEREST_00662
9335 CONTINUE/train/CONTINUE_00837
9335 FURTHER/train/FURTHER_00343
9335 TONIGHT/train/TONIGHT_00612
9335 ECONOMIC/train/ECONOMIC_00766
9335 SECTOR/train/SECTOR_00289
9335 PLACES/train/PLACES_00159
9335 STATEMENT/train/STATEMENT_00094
9335 CLEAR/train/CLEAR_00990
9335 MARKET/train/MARKET_00701
9335 FORWARD/train/FORWARD_00589
9335 INFLATION/train/INFLATION_00153
9335 FRANCE/train/FRANCE_00878
9335 POWER/train/POWER_00160
9335 FIRST/train/FIRST_00829
9335 AHEAD/test/AHEAD_00031
9335 BILLION/train/BILLION_00415
9335 PROBABLY/train/PROBABLY_00424
9335 CALLED/train/CALLED_00777
9335 CURRENT/train/CURRENT_00665
9335 FACING/train/FACING_00058
9335 DIFFICULT/train/DIFFICULT_00761
9335 UNION/train/UNION_00623
9335 QUESTION/train/QUESTION_00796
9335 THERE/train/THERE_00604
9335 WANTED/val/WANTED_00039
9335 UNION/train/UNION_00550
9335 MEDICAL/val/MEDICAL_00014
9335 BUSINESS/train/BUSINESS_00457
9335 MEASURES/train/MEASURES_00092
9335 FINANCIAL/train/FINANCIAL_00007
9335 ISSUE/train/ISSUE_00138
9335 START/train/START_00473
9335 FINANCIAL/train/FINANCIAL_00333
9335 RULES/train/RULES_00698
9335 WHETHER/train/WHETHER_00529
9335 LATER/train/LATER_00767
9335 COMMUNITY/val/COMMUNITY_00040
9335 HOMES/train/HOMES_00561
9335 POLICY/train/POLICY_00069
9335 SEVEN/train/SEVEN_00219
9335 GROUP/train/GROUP_00144
9335 AMOUNT/train/AMOUNT_00211
9335 SECTOR/train/SECTOR_00759
9335 BANKS/train/BANKS_00524
9335 COUPLE/train/COUPLE_00926
9335 HAPPENING/train/HAPPENING_00084
9335 RATES/train/RATES_00400
9335 PRICES/train/PRICES_00298
9335 FRONT/test/FRONT_00009
9335 BEING/train/BEING_00422
9335 BENEFIT/train/BENEFIT_00617
9335 QUESTION/train/QUESTION_00600
9335 EVENTS/train/EVENTS_00813
9335 LATEST/train/LATEST_00937
9335 THREE/train/THREE_00577
9335 IMPORTANT/train/IMPORTANT_00857
9335 WANTS/train/WANTS_00576
9335 TRUST/train/TRUST_00208
9335 LIVING/train/LIVING_00641
9335 WORDS/train/WORDS_00156
9335 GERMANY/train/GERMANY_00641
9335 PRIVATE/train/PRIVATE_00936
9335 CUSTOMERS/train/CUSTOMERS_00126
9335 STAFF/train/STAFF_00658
9335 SMALL/test/SMALL_00036
9335 EXPECTED/train/EXPECTED_00303
9335 FINANCIAL/train/FINANCIAL_00311
9335 OUTSIDE/train/OUTSIDE_00595
9335 ACTION/train/ACTION_00536
9335 KNOWN/train/KNOWN_00891
9335 INFLATION/train/INFLATION_00303
9335 PLANS/train/PLANS_00648
9335 FACING/train/FACING_00892
9335 LIKELY/train/LIKELY_00033
9335 MARKET/train/MARKET_00178
9335 JAMES/train/JAMES_00362
9335 POLICY/train/POLICY_00649
9335 SECTOR/train/SECTOR_00786
9335 SITUATION/val/SITUATION_00030
9335 ECONOMY/train/ECONOMY_00317
9335 HISTORY/train/HISTORY_00985
9335 LOOKING/train/LOOKING_00789
9335 SEEMS/train/SEEMS_00982
9335 CUSTOMERS/train/CUSTOMERS_00119
9335 BANKS/train/BANKS_00852
9335 AHEAD/train/AHEAD_00451
9335 MONTH/train/MONTH_00115
9335 WORKERS/train/WORKERS_00282
9335 WHETHER/train/WHETHER_00104
9335 PRIME/train/PRIME_00604
9335 INFLATION/train/INFLATION_00334
9335 SPENT/train/SPENT_00806
9335 BROUGHT/train/BROUGHT_00764
9335 HEARD/train/HEARD_00517
9335 TAKING/train/TAKING_00653
9335 TAKING/train/TAKING_00822
9335 DEBATE/train/DEBATE_00287
9335 FACING/train/FACING_00503
9335 DIFFERENT/train/DIFFERENT_00150
9335 GROWING/train/GROWING_00842
9335 EXPECT/train/EXPECT_00973
9335 POLICE/train/POLICE_00502
9335 ENERGY/train/ENERGY_00111
9335 POSITION/test/POSITION_00013
9335 GOING/train/GOING_00195
9335 INCREASE/train/INCREASE_00124
9335 AMOUNT/train/AMOUNT_00764
9335 PROBLEM/train/PROBLEM_00569
9335 STAFF/train/STAFF_00144
9335 POWER/train/POWER_00558
9335 MOVING/train/MOVING_00819
9335 OTHER/train/OTHER_00683
9335 BANKS/train/BANKS_00908
9335 SERVICE/train/SERVICE_00602
9335 MONEY/train/MONEY_00662
9335 SOCIAL/train/SOCIAL_00125
9335 SITUATION/train/SITUATION_00075
9335 HOSPITAL/train/HOSPITAL_00117
9335 STRONG/train/STRONG_00815
9335 NEVER/train/NEVER_00419
9335 RUNNING/train/RUNNING_00038
9335 POLITICAL/train/POLITICAL_00457
9335 NUMBERS/train/NUMBERS_00888
9335 SAYING/train/SAYING_00648
9335 WAITING/train/WAITING_00318
9335 PERSON/train/PERSON_00451
9335 HEALTH/train/HEALTH_00064
9335 INFORMATION/train/INFORMATION_00119
9335 POLICY/train/POLICY_00921
9335 BEING/train/BEING_00409
9335 LONDON/train/LONDON_00538
9335 PRICE/train/PRICE_00697
9335 SECTOR/train/SECTOR_00696
9335 BILLION/train/BILLION_00423
9335 CASES/train/CASES_00713
9335 SECTOR/train/SECTOR_00116
9335 CANNOT/train/CANNOT_00740
9335 SINCE/train/SINCE_00838
9335 BANKS/train/BANKS_00611
9335 ECONOMIC/train/ECONOMIC_00565
9335 EMERGENCY/train/EMERGENCY_00035
9335 LEGAL/train/LEGAL_00226
9335 BRITISH/train/BRITISH_00008
9335 REPORT/train/REPORT_00369
9335 TODAY/train/TODAY_00086
9335 ASKED/train/ASKED_00172
9335 CONFERENCE/train/CONFERENCE_00463
9335 LATEST/train/LATEST_00842
9335 BUDGET/train/BUDGET_00662
9335 REASON/train/REASON_00778
9335 PARLIAMENT/train/PARLIAMENT_00955
9335 IMPACT/train/IMPACT_00940
9335 BANKS/train/BANKS_00247
9335 NEEDS/train/NEEDS_00287
9335 UNION/train/UNION_00607
9335 GROWTH/train/GROWTH_00338
9335 CONTINUE/train/CONTINUE_00864
9335 POTENTIAL/train/POTENTIAL_00220
9335 RATES/train/RATES_00177
9335 INFLATION/train/INFLATION_00590
9335 SECTOR/train/SECTOR_00181
9335 PERIOD/train/PERIOD_00795
9335 SCOTTISH/train/SCOTTISH_00311
9335 WEEKS/train/WEEKS_00378
9335 ENOUGH/train/ENOUGH_00006
9335 FURTHER/train/FURTHER_00084
9335 STREET/train/STREET_00822
9335 WITHOUT/train/WITHOUT_00659
9335 DEFICIT/train/DEFICIT_00864
9335 EDUCATION/train/EDUCATION_00470
9335 AGREE/train/AGREE_00473
9335 BROUGHT/train/BROUGHT_00370
9335 PRETTY/train/PRETTY_00385
9335 WORST/train/WORST_00005
9335 INDUSTRY/train/INDUSTRY_00672
9335 THINK/train/THINK_00955
9335 INDUSTRY/train/INDUSTRY_00509
9335 GERMANY/train/GERMANY_00278
9335 GREECE/train/GREECE_00417
9335 WESTMINSTER/train/WESTMINSTER_00478
9335 WHILE/train/WHILE_00615
9335 SYSTEM/train/SYSTEM_00779
9335 MESSAGE/train/MESSAGE_00564
9335 WOULD/test/WOULD_00045
9335 WANTED/train/WANTED_00039
9335 INVESTMENT/val/INVESTMENT_00018
9335 SECTOR/train/SECTOR_00707
9335 POLITICAL/train/POLITICAL_00748
9335 FRENCH/train/FRENCH_00640
9335 HEALTH/train/HEALTH_00740
9335 USING/train/USING_00331
9335 GROWTH/train/GROWTH_00168
9335 HEARD/train/HEARD_00904
9335 EMERGENCY/train/EMERGENCY_00013
9335 CONTINUE/train/CONTINUE_00218
9335 ECONOMIC/train/ECONOMIC_00634
9335 LABOUR/train/LABOUR_00766
9335 AMOUNT/train/AMOUNT_00728
9335 QUESTIONS/train/QUESTIONS_00604
9335 WEEKS/train/WEEKS_00902
9335 WHOLE/train/WHOLE_00705
9335 PROVIDE/train/PROVIDE_00350
9335 BILLION/val/BILLION_00045
9335 SYSTEM/train/SYSTEM_00211
9335 LIVING/train/LIVING_00872
9335 DOING/train/DOING_00447
9335 SHOULD/train/SHOULD_00016
9335 POTENTIAL/train/POTENTIAL_00667
9335 STAFF/train/STAFF_00867
9335 BUDGET/train/BUDGET_00306
9335 GROWTH/train/GROWTH_00209
9335 GEORGE/train/GEORGE_00026
9335 EVERY/train/EVERY_00519
9335 CURRENT/train/CURRENT_00096
9335 POLICY/train/POLICY_00318
9335 NUMBERS/test/NUMBERS_00038
9335 MESSAGE/train/MESSAGE_00450
9335 DEFICIT/train/DEFICIT_00008
9335 ENGLAND/train/ENGLAND_00800
9335 GROWTH/train/GROWTH_00825
9335 MAJOR/train/MAJOR_00855
9335 IMPACT/train/IMPACT_00638
9335 BEING/train/BEING_00165
9335 HOUSING/train/HOUSING_00421
9335 BEFORE/train/BEFORE_00522
9335 ECONOMIC/train/ECONOMIC_00610
9335 CAPITAL/train/CAPITAL_00238
9335 AREAS/train/AREAS_00805
9335 EXAMPLE/train/EXAMPLE_00758
9335 THREE/train/THREE_00703
9335 IRELAND/train/IRELAND_00452
9335 NEEDS/train/NEEDS_00934
9335 ELECTION/train/ELECTION_00988
9335 YESTERDAY/train/YESTERDAY_00579
9335 CAMERON/train/CAMERON_00792
9335 MEDICAL/train/MEDICAL_00191
9335 EXTRA/train/EXTRA_00616
9335 PRICES/train/PRICES_00387
9335 ACCESS/train/ACCESS_00386
9335 PROBLEMS/val/PROBLEMS_00029
9335 STATEMENT/train/STATEMENT_00867
9335 BANKS/train/BANKS_00326
9335 BETTER/train/BETTER_00326
9335 GERMANY/train/GERMANY_00022
9335 OPERATION/train/OPERATION_00308
9335 START/train/START_00367
9335 WOULD/train/WOULD_00474
9335 EXPECT/train/EXPECT_00611
9335 BANKS/train/BANKS_00395
9335 GENERAL/train/GENERAL_00935
9335 GROWTH/train/GROWTH_00679
9335 HAPPENING/train/HAPPENING_00243
9335 GROWTH/train/GROWTH_00773
9335 BELIEVE/train/BELIEVE_00247
9335 GOING/test/GOING_00043
9335 GROWTH/train/GROWTH_00695
9335 LONGER/train/LONGER_00832
9335 POTENTIAL/train/POTENTIAL_00811
9335 THOSE/train/THOSE_00329
9335 EVERYTHING/train/EVERYTHING_00218
9335 WORKERS/train/WORKERS_00468
9335 CENTRAL/train/CENTRAL_00014
9335 GERMANY/train/GERMANY_00170
9335 BROUGHT/train/BROUGHT_00037
9335 CONSERVATIVE/test/CONSERVATIVE_00024
9335 CANCER/train/CANCER_00832
9335 NEEDS/train/NEEDS_00172
9335 THIRD/train/THIRD_00181
9335 CALLED/val/CALLED_00036
9335 POSSIBLE/train/POSSIBLE_00977
9335 INTEREST/train/INTEREST_00069
9335 GROWTH/train/GROWTH_00802
9335 SPENDING/train/SPENDING_00203
9335 INFLATION/train/INFLATION_00231
9335 EUROPE/train/EUROPE_00131
9335 INFORMATION/train/INFORMATION_00567
9335 STAFF/train/STAFF_00976
9335 MONTHS/train/MONTHS_00574
9335 RATES/train/RATES_00362
9335 SECTOR/train/SECTOR_00721
9335 THOSE/train/THOSE_00276
9335 PLACES/val/PLACES_00017
9335 HOUSING/train/HOUSING_00393
9335 EVERY/val/EVERY_00007
9335 ISSUE/train/ISSUE_00934
9335 BILLION/train/BILLION_00749
9335 WANTED/train/WANTED_00213
9335 THEIR/train/THEIR_00787
9335 INFLATION/train/INFLATION_00150
9335 STATEMENT/train/STATEMENT_00862
9335 EARLY/train/EARLY_00015
9335 WELCOME/train/WELCOME_00992
9335 PRIVATE/train/PRIVATE_00799
9335 SPENDING/train/SPENDING_00196
9335 POLICY/train/POLICY_00151
9335 CONTROL/train/CONTROL_00592
9335 POSITION/train/POSITION_00945
9335 EMERGENCY/val/EMERGENCY_00034
9335 PRIVATE/train/PRIVATE_00230
9335 LATEST/train/LATEST_00089
9335 LIKELY/train/LIKELY_00487
9335 EARLY/train/EARLY_00259
9335 WORDS/train/WORDS_00129
9335 INCREASE/train/INCREASE_00976
9335 MIGHT/train/MIGHT_00626
9335 STAGE/train/STAGE_00202
9335 LEADERS/train/LEADERS_00154
9335 PRESSURE/train/PRESSURE_00010
9335 DEFICIT/train/DEFICIT_00511
9335 AUTHORITIES/train/AUTHORITIES_00298
9335 FORCE/train/FORCE_00280
9335 THREE/train/THREE_00099
9335 DEFICIT/train/DEFICIT_00243
9335 THOUGHT/train/THOUGHT_00876
9335 SMALL/train/SMALL_00730
9335 ENERGY/train/ENERGY_00879
9335 PROTECT/train/PROTECT_00547
9335 NEVER/train/NEVER_00821
9335 LEADERS/train/LEADERS_00146
9335 DEFICIT/train/DEFICIT_00210
9335 LONDON/train/LONDON_00884
9335 THREE/test/THREE_00042
9335 POLITICIANS/train/POLITICIANS_00100
9335 TOMORROW/train/TOMORROW_00154
9335 ORDER/train/ORDER_00638
9335 RECORD/train/RECORD_00766
9335 EVENTS/train/EVENTS_00627
9335 TERMS/train/TERMS_00559
9335 ENGLAND/train/ENGLAND_00408
9335 LOCAL/train/LOCAL_00378
9335 STILL/train/STILL_00380
9335 ASKED/train/ASKED_00791
9335 OTHERS/train/OTHERS_00105
9335 CONFERENCE/train/CONFERENCE_00408
9335 WORKING/train/WORKING_00888
9335 FOCUS/train/FOCUS_00907
9335 DIFFICULT/train/DIFFICULT_00784
9335 MORNING/train/MORNING_00120
9335 UNDERSTAND/train/UNDERSTAND_00180
9335 BANKS/train/BANKS_00518
9335 FIGURES/train/FIGURES_00344
9335 INFLATION/train/INFLATION_00684
9335 TODAY/train/TODAY_00421
9335 RECENT/train/RECENT_00861
9335 TERMS/val/TERMS_00045
9335 COMMUNITY/train/COMMUNITY_00167
9335 POLICY/train/POLICY_00155
9335 ANOTHER/train/ANOTHER_00157
9335 HEALTH/train/HEALTH_00791
9335 GROWTH/train/GROWTH_00451
9335 DIFFERENT/train/DIFFERENT_00695
9335 EXTRA/train/EXTRA_00007
9335 BANKS/train/BANKS_00016
9335 HOUSING/train/HOUSING_00997
9335 DEBATE/train/DEBATE_00706
9335 BANKS/train/BANKS_00516
9335 STAFF/train/STAFF_00694
9335 PRIVATE/train/PRIVATE_00184
9335 PLACE/train/PLACE_00790
9335 OTHERS/train/OTHERS_00541
9335 RATES/train/RATES_00938
9335 SPEECH/train/SPEECH_00978
9335 THOUGHT/train/THOUGHT_00989
9335 MEANS/train/MEANS_00549
9335 CHALLENGE/train/CHALLENGE_00852
9335 GOVERNMENT/train/GOVERNMENT_00240
9335 YEARS/val/YEARS_00025
9335 BUDGET/train/BUDGET_00586
9335 BILLION/train/BILLION_00308
9335 BENEFITS/train/BENEFITS_00144
9335 AHEAD/train/AHEAD_00715
9335 HOSPITAL/test/HOSPITAL_00047
9335 AFFECTED/train/AFFECTED_00187
9335 RATES/train/RATES_00698
9335 MINISTERS/train/MINISTERS_00307
9335 FINANCIAL/train/FINANCIAL_00824
9335 BEFORE/train/BEFORE_00016
9335 RECORD/train/RECORD_00333
9335 ENOUGH/train/ENOUGH_00570
9335 GROWTH/train/GROWTH_00823
9335 AHEAD/train/AHEAD_00589
9335 FRANCE/train/FRANCE_00886
9335 LONGER/train/LONGER_00263
9335 CONCERNS/train/CONCERNS_00798
9335 INCREASE/val/INCREASE_00040
9335 POLITICIANS/train/POLITICIANS_00726
9335 PRICES/train/PRICES_00012
9335 TALKING/train/TALKING_00844
9335 AHEAD/train/AHEAD_00543
9335 SCOTTISH/train/SCOTTISH_00192
9335 FORMER/train/FORMER_00849
9335 MAKING/train/MAKING_00211
9335 WITHOUT/train/WITHOUT_00052
9335 HIGHER/train/HIGHER_00836
9335 MEDIA/train/MEDIA_00314
9335 EXPECTED/train/EXPECTED_00185
9335 JAMES/train/JAMES_00815
9335 ENOUGH/train/ENOUGH_00850
9335 THERE/train/THERE_00905
9335 INTEREST/train/INTEREST_00979
9335 RESULT/train/RESULT_00017
9335 SECRETARY/train/SECRETARY_00556
9335 FINANCIAL/train/FINANCIAL_00686
9335 WORKERS/train/WORKERS_00255
9335 MESSAGE/train/MESSAGE_00111
9335 GETTING/train/GETTING_00967
9335 SAYING/train/SAYING_00517
9335 GOVERNMENT/train/GOVERNMENT_00308
9335 WHILE/train/WHILE_00693
9335 PUBLIC/train/PUBLIC_00815
9335 PATIENTS/train/PATIENTS_00916
9335 THERE/val/THERE_00016
9335 SIGNIFICANT/train/SIGNIFICANT_00713
9335 PRETTY/train/PRETTY_00775
9335 RIGHT/train/RIGHT_00349
9335 THING/train/THING_00762
9335 BUSINESS/train/BUSINESS_00911
9335 THEMSELVES/test/THEMSELVES_00032
9335 COUPLE/train/COUPLE_00080
9335 IMPORTANT/train/IMPORTANT_00999
9335 GOVERNMENT/train/GOVERNMENT_00260
9335 POLICY/train/POLICY_00374
9335 SECOND/train/SECOND_00731
9335 SERVICES/val/SERVICES_00050
9335 NUMBER/train/NUMBER_00548
9335 ANSWER/train/ANSWER_00707
9335 HAPPEN/train/HAPPEN_00582
9335 BENEFIT/train/BENEFIT_00040
9335 ALMOST/train/ALMOST_00596
9335 PRICE/train/PRICE_00276
9335 INFLATION/train/INFLATION_00439
9335 DEFICIT/train/DEFICIT_00780
9335 SEEMS/train/SEEMS_00512
9335 OFTEN/train/OFTEN_00022
9335 YEARS/train/YEARS_00141
9335 CASES/train/CASES_00967
9335 MIGHT/train/MIGHT_00875
9335 OTHERS/train/OTHERS_00879
9335 WARNING/train/WARNING_00093
9335 RESULT/train/RESULT_00192
9335 THEIR/train/THEIR_00689
9335 ACCESS/train/ACCESS_00735
9335 INDUSTRY/train/INDUSTRY_00905
9335 COMPANY/train/COMPANY_00495
9335 BANKS/train/BANKS_00768
9335 HEALTH/train/HEALTH_00384
9335 LIVING/train/LIVING_00566
9335 YEARS/train/YEARS_00508
9335 HEALTH/train/HEALTH_00115
9335 LATEST/train/LATEST_00774
9335 EMERGENCY/train/EMERGENCY_00415
9335 NUMBERS/train/NUMBERS_00396
9335 TERMS/train/TERMS_00238
9335 MINISTER/train/MINISTER_00753
9335 PUBLIC/train/PUBLIC_00040
9335 REMEMBER/train/REMEMBER_00235
9335 RATES/train/RATES_00181
9335 QUESTIONS/train/QUESTIONS_00113
9335 RATES/train/RATES_00837
9335 FINAL/train/FINAL_00103
9335 MONTH/train/MONTH_00126
9335 COUPLE/train/COUPLE_00667
9335 PRIVATE/train/PRIVATE_00200
9335 BUSINESSES/train/BUSINESSES_00310
9335 LIVES/train/LIVES_00531
9335 COUPLE/train/COUPLE_00852
9335 THING/train/THING_00968
9335 PROBLEMS/train/PROBLEMS_00246
9335 BUSINESSES/train/BUSINESSES_00788
9335 DIFFERENT/train/DIFFERENT_00856
9335 FINANCIAL/train/FINANCIAL_00575
9335 STAFF/train/STAFF_00957
9335 EUROPE/train/EUROPE_00787
9335 DEFICIT/train/DEFICIT_00772
9335 BUSINESSES/train/BUSINESSES_00069
9335 STAGE/train/STAGE_00401
9335 THOSE/train/THOSE_00502
9335 GROWTH/train/GROWTH_00954
9335 AHEAD/train/AHEAD_00022
9335 WHILE/train/WHILE_00401
9335 HEALTH/train/HEALTH_00318
9335 RATHER/train/RATHER_00034
9335 DIFFERENCE/train/DIFFERENCE_00429
9335 SAYING/train/SAYING_00574
9335 EVENTS/train/EVENTS_00218
9335 NEEDS/train/NEEDS_00511
9335 AROUND/test/AROUND_00034
9335 FORCE/train/FORCE_00332
9335 PLACES/train/PLACES_00726
9335 INTEREST/train/INTEREST_00099
9335 STAFF/train/STAFF_00818
9335 SERVICES/train/SERVICES_00740
9335 LIVING/train/LIVING_00504
9335 SERVICES/train/SERVICES_00330
9335 MAKES/train/MAKES_00084
9335 HOSPITAL/val/HOSPITAL_00003
9335 MARKET/train/MARKET_00167
9335 GROWTH/train/GROWTH_00866
9335 ANOTHER/train/ANOTHER_00619
9335 FOCUS/test/FOCUS_00026
9335 DIFFERENCE/train/DIFFERENCE_00707
9335 PUBLIC/train/PUBLIC_00808
9335 HEART/train/HEART_00356
9335 EVERYBODY/train/EVERYBODY_00939
9335 HEALTH/train/HEALTH_00186
9335 MAJORITY/train/MAJORITY_00886
9335 PATIENTS/val/PATIENTS_00014
9335 SIGNIFICANT/train/SIGNIFICANT_00088
9335 ALREADY/test/ALREADY_00001
9335 ALREADY/train/ALREADY_00422
9335 EUROPE/train/EUROPE_00306
9335 THEIR/train/THEIR_00229
9335 MONTHS/train/MONTHS_00779
9335 BUDGET/train/BUDGET_00033
9335 GROWTH/train/GROWTH_00554
9335 INDUSTRY/train/INDUSTRY_00412
9335 WELFARE/train/WELFARE_00312
9335 POTENTIAL/train/POTENTIAL_00094
9335 HOSPITAL/train/HOSPITAL_00218
9335 FOCUS/train/FOCUS_00014
9335 COMES/train/COMES_00553
9335 PUBLIC/train/PUBLIC_00290
9335 EVERYTHING/train/EVERYTHING_00828
9335 DEFICIT/train/DEFICIT_00490
9335 CENTRAL/train/CENTRAL_00759
9335 INFLATION/train/INFLATION_00302
9335 BENEFIT/train/BENEFIT_00812
9335 GREECE/train/GREECE_00027
9335 COUNTRIES/train/COUNTRIES_00981
9335 FOCUS/train/FOCUS_00267
9335 RIGHT/val/RIGHT_00002
9335 HEALTH/train/HEALTH_00491
9335 LIVING/train/LIVING_00823
9335 CASES/train/CASES_00933
9335 PROVIDE/test/PROVIDE_00001
9335 EMERGENCY/train/EMERGENCY_00379
9335 ECONOMY/train/ECONOMY_00808
9335 NORTHERN/train/NORTHERN_00524
9335 SECTOR/train/SECTOR_00898
9335 RATES/train/RATES_00493
9335 TERMS/train/TERMS_00579
9335 AUTHORITIES/train/AUTHORITIES_00867
9335 AHEAD/train/AHEAD_00351
9335 GROWTH/train/GROWTH_00621
9335 THING/train/THING_00402
9335 WHOLE/train/WHOLE_00396
9335 WORKERS/train/WORKERS_00178
9335 SUPPORT/train/SUPPORT_00251
9335 GROWING/train/GROWING_00287
9335 LEVELS/train/LEVELS_00012
9335 MISSING/train/MISSING_00293
9335 CHILDREN/train/CHILDREN_00981
9335 CHARGES/train/CHARGES_00538
9335 GIVING/train/GIVING_00352
9335 MAJOR/train/MAJOR_00550
9335 AFFECTED/train/AFFECTED_00633
9335 EUROPEAN/train/EUROPEAN_00251
9335 AROUND/train/AROUND_00651
9335 SECTOR/train/SECTOR_00287
9335 AUTHORITIES/train/AUTHORITIES_00231
9335 OTHER/train/OTHER_00450
9335 CONCERNS/train/CONCERNS_00733
9335 SERVICES/train/SERVICES_00784
9335 WRONG/train/WRONG_00258
9335 BECAUSE/train/BECAUSE_00355
9335 MILLIONS/train/MILLIONS_00411
9335 SEVERAL/train/SEVERAL_00769
9335 BETWEEN/test/BETWEEN_00021
9335 BANKS/train/BANKS_00499
9335 CRISIS/train/CRISIS_00787
9335 GROWTH/train/GROWTH_00594
9335 DEFICIT/train/DEFICIT_00363
9335 FACING/train/FACING_00650
9335 HEALTH/train/HEALTH_00878
9335 THERE/val/THERE_00042
9335 ANYTHING/train/ANYTHING_00715
9335 WHETHER/train/WHETHER_00329
9335 REASON/train/REASON_00327
9335 AFTERNOON/train/AFTERNOON_00716
9335 OUTSIDE/train/OUTSIDE_00261
9335 EVIDENCE/train/EVIDENCE_00226
9335 RATES/train/RATES_00684
9335 STREET/train/STREET_00908
9335 STARTED/train/STARTED_00951
9335 BANKS/train/BANKS_00235
9335 WHETHER/train/WHETHER_00347
9335 LABOUR/train/LABOUR_00025
9335 MAJORITY/train/MAJORITY_00961
9335 INFLATION/train/INFLATION_00020
9335 EUROPEAN/train/EUROPEAN_00499
9335 EARLY/train/EARLY_00991
9335 TALKS/test/TALKS_00034
9335 OFTEN/train/OFTEN_00551
9335 WEEKS/train/WEEKS_00182
9335 WEEKEND/train/WEEKEND_00253
9335 NATIONAL/train/NATIONAL_00299
9335 CENTRAL/train/CENTRAL_00679
9335 RATES/train/RATES_00161
9335 MONEY/train/MONEY_00312
9335 RECORD/train/RECORD_00483
9335 OUTSIDE/train/OUTSIDE_00288
9335 EMERGENCY/val/EMERGENCY_00025
9335 GROWTH/train/GROWTH_00878
9335 TOWARDS/train/TOWARDS_00655
9335 BANKS/train/BANKS_00910
9335 THESE/train/THESE_00206
9335 DETAILS/train/DETAILS_00783
9335 BANKS/train/BANKS_00325
9335 EXACTLY/train/EXACTLY_00442
9335 CLEAR/train/CLEAR_00619
9335 MEETING/train/MEETING_00670
9335 REALLY/train/REALLY_00926
9335 MAYBE/train/MAYBE_00463
9335 SIGNIFICANT/train/SIGNIFICANT_00368
9335 INDUSTRY/train/INDUSTRY_00887
9335 MEDICAL/train/MEDICAL_00176
9335 SPENDING/train/SPENDING_00450
9335 RUSSIAN/train/RUSSIAN_00881
9335 ABOUT/train/ABOUT_00451
9335 ABOUT/train/ABOUT_00031
9335 SINGLE/train/SINGLE_00885
9335 STATE/train/STATE_00091
9335 AHEAD/train/AHEAD_00217
9335 PLANS/train/PLANS_00994
9335 LIVES/train/LIVES_00124
9335 MONTH/train/MONTH_00763
9335 DIFFERENCE/train/DIFFERENCE_00074
9335 HEARD/train/HEARD_00612
9335 COUPLE/train/COUPLE_00119
9335 SENIOR/train/SENIOR_00085
9335 ECONOMY/train/ECONOMY_00439
9335 BILLION/train/BILLION_00438
9335 BRITISH/train/BRITISH_00174
9335 CENTRAL/train/CENTRAL_00460
9335 FOCUS/train/FOCUS_00598
9335 FINANCIAL/test/FINANCIAL_00036
9335 NUMBERS/train/NUMBERS_00880
9335 EXTRA/train/EXTRA_00127
9335 SERVICE/val/SERVICE_00004
9335 MIDDLE/train/MIDDLE_00142
9335 POTENTIAL/train/POTENTIAL_00025
9335 RECENT/train/RECENT_00529
9335 THOSE/train/THOSE_00054
9335 ACTION/train/ACTION_00660
9335 PATIENTS/val/PATIENTS_00045
9335 GETTING/train/GETTING_00670
9335 ISSUES/train/ISSUES_00571
9335 PRIME/train/PRIME_00030
9335 BUDGET/train/BUDGET_00387
9335 EXTRA/train/EXTRA_00378
9335 CLEAR/train/CLEAR_00663
9335 CLOUD/train/CLOUD_00622
9335 ECONOMY/train/ECONOMY_00728
9335 HEALTH/train/HEALTH_00106
9335 DEATH/train/DEATH_00311
9335 QUITE/train/QUITE_00805
9335 ASKED/train/ASKED_00322
9335 INVESTMENT/test/INVESTMENT_00012
9335 RATES/train/RATES_00188
9335 PRICE/train/PRICE_00705
9335 LOOKING/train/LOOKING_00645
9335 PARLIAMENT/train/PARLIAMENT_00637
9335 MINISTERS/train/MINISTERS_00643
9335 ACCORDING/train/ACCORDING_00712
9335 REASON/train/REASON_00997
9335 BUDGET/train/BUDGET_00646
9335 SPEND/train/SPEND_00300
9335 DEBATE/train/DEBATE_00455
9335 WANTED/val/WANTED_00020
9335 ECONOMIC/train/ECONOMIC_00809
9335 PATIENTS/train/PATIENTS_00285
9335 FORWARD/train/FORWARD_00851
9335 EARLY/train/EARLY_00922
9335 LITTLE/train/LITTLE_00310
9335 HOURS/test/HOURS_00034
9335 MEASURES/train/MEASURES_00476
9335 STAFF/train/STAFF_00861
9335 THROUGH/train/THROUGH_00132
9335 BLACK/train/BLACK_00851
9335 TALKS/test/TALKS_00028
9335 CLOSE/train/CLOSE_00708
9335 NUMBERS/train/NUMBERS_00550
9335 EUROPE/train/EUROPE_00519
9335 PUBLIC/train/PUBLIC_00037
9335 STARTED/train/STARTED_00180
9335 TODAY/train/TODAY_00949
9335 INFLATION/train/INFLATION_00520
9335 SAYING/train/SAYING_00556
9335 OTHERS/train/OTHERS_00537
9335 DEBATE/train/DEBATE_00767
9335 MARKET/train/MARKET_00547
9335 LITTLE/train/LITTLE_00984
9335 CHANGES/train/CHANGES_00582
9335 RESPONSE/test/RESPONSE_00006
9335 IMPACT/train/IMPACT_00700
9335 BIGGEST/train/BIGGEST_00645
9335 INTEREST/train/INTEREST_00274
9335 EVERY/train/EVERY_00653
9335 THING/val/THING_00002
9335 CLEAR/train/CLEAR_00464
9335 HEARD/train/HEARD_00994
9335 CONCERNS/train/CONCERNS_00295
9335 GROWTH/train/GROWTH_00991
9335 ALLOW/train/ALLOW_00639
9335 COUPLE/train/COUPLE_00410
9335 GENERAL/train/GENERAL_00336
9335 RECORD/train/RECORD_00845
9335 PEOPLE/train/PEOPLE_00248
9335 CANCER/train/CANCER_00514
9335 LEVELS/train/LEVELS_00345
9335 SECTOR/train/SECTOR_00582
9335 MINISTERS/test/MINISTERS_00031
9335 HOSPITAL/train/HOSPITAL_00387
9335 LEAST/train/LEAST_00073
9335 LITTLE/train/LITTLE_00436
9335 BANKS/train/BANKS_00178
9335 LEADERSHIP/train/LEADERSHIP_00600
9335 GROUP/train/GROUP_00636
9335 CHANCE/train/CHANCE_00351
9335 THERE/train/THERE_00946
9335 YESTERDAY/train/YESTERDAY_00296
9335 TOGETHER/train/TOGETHER_00256
9335 RECORD/train/RECORD_00073
9335 GOING/train/GOING_00102
9335 DEFICIT/train/DEFICIT_00536
9335 REMEMBER/train/REMEMBER_00833
9335 SEEMS/val/SEEMS_00015
9335 GREECE/train/GREECE_00980
9335 SECOND/train/SECOND_00966
9335 LEVEL/train/LEVEL_00662
9335 DIFFERENCE/train/DIFFERENCE_00013
9335 EVERYONE/train/EVERYONE_00587
9335 PUBLIC/train/PUBLIC_00620
9335 COMES/train/COMES_00773
9335 PRETTY/test/PRETTY_00034
9335 MEDICAL/test/MEDICAL_00026
9335 RATES/train/RATES_00191
9335 BUSINESS/train/BUSINESS_00066
9335 CENTRAL/train/CENTRAL_00939
9335 WOULD/train/WOULD_00792
9335 MEDIA/train/MEDIA_00935
9335 INTEREST/train/INTEREST_00260
9335 MAKING/train/MAKING_00761
9335 MAJORITY/train/MAJORITY_00769
9335 PATIENTS/train/PATIENTS_00739
9335 SECTOR/train/SECTOR_00830
9335 LITTLE/train/LITTLE_00747
9335 SERVICE/train/SERVICE_00446
9335 PRICES/train/PRICES_00574
9335 DIFFICULT/train/DIFFICULT_00019
9335 TAKEN/train/TAKEN_00593
9335 MIGHT/train/MIGHT_00859
9335 EMERGENCY/train/EMERGENCY_00490
9335 INDUSTRY/train/INDUSTRY_00279
9335 MEDICAL/train/MEDICAL_00728
9335 PLANS/train/PLANS_00484
9335 WHICH/train/WHICH_00919
9335 SIMPLY/train/SIMPLY_00205
9335 WAITING/test/WAITING_00004
9335 INFLATION/train/INFLATION_00421
9335 HOSPITAL/val/HOSPITAL_00037
9335 INDUSTRY/train/INDUSTRY_00760
9335 EVENTS/train/EVENTS_00056
9335 HEARD/train/HEARD_00323
9335 ECONOMY/train/ECONOMY_00806
9335 MESSAGE/train/MESSAGE_00136
9335 INVESTMENT/train/INVESTMENT_00028
9335 PUBLIC/test/PUBLIC_00023
9335 LOCAL/train/LOCAL_00455
9335 STREET/train/STREET_00569
9335 COMES/train/COMES_00941
9335 MESSAGE/train/MESSAGE_00357
9335 AGAIN/train/AGAIN_00779
9335 SOUTH/train/SOUTH_00588
9335 GROWTH/train/GROWTH_00514
9335 CHIEF/train/CHIEF_00093
9335 WHOLE/train/WHOLE_00650
9335 MAYBE/train/MAYBE_00123
9335 FOCUS/train/FOCUS_00549
9335 THESE/train/THESE_00352
9335 NUMBERS/train/NUMBERS_00007
9335 FACING/train/FACING_00458
9335 FURTHER/train/FURTHER_00366
9335 LEVEL/train/LEVEL_00796
9335 ISSUE/train/ISSUE_00185
9335 ANNOUNCED/train/ANNOUNCED_00641
9335 MORNING/train/MORNING_00748
9335 TERMS/train/TERMS_00438
9335 THOUGHT/train/THOUGHT_00549
9335 GENERAL/train/GENERAL_00971
9335 LOOKING/train/LOOKING_00700
9335 SEVERAL/train/SEVERAL_00636
9335 WHOLE/train/WHOLE_00698
9335 TOMORROW/test/TOMORROW_00012
9335 OUTSIDE/train/OUTSIDE_00560
9335 BEHIND/train/BEHIND_00099
9335 BUSINESS/train/BUSINESS_00202
9335 GROWTH/train/GROWTH_00952
9335 PATIENTS/train/PATIENTS_00421
9335 NUMBER/train/NUMBER_00534
9335 GIVING/train/GIVING_00982
9335 DEFICIT/train/DEFICIT_00833
9335 HOUSE/train/HOUSE_00649
9335 EARLY/test/EARLY_00042
9335 GREECE/train/GREECE_00837
9335 SHORT/train/SHORT_00130
9335 MIGHT/train/MIGHT_00722
9335 BEFORE/test/BEFORE_00021
9335 GREECE/train/GREECE_00961
9335 SIGNIFICANT/train/SIGNIFICANT_00112
9335 ELECTION/train/ELECTION_00906
9335 ECONOMY/train/ECONOMY_00480
9335 LIVING/train/LIVING_00925
9335 STAFF/train/STAFF_00855
9335 LABOUR/test/LABOUR_00041
9335 OTHER/train/OTHER_00250
9335 RUNNING/train/RUNNING_00157
9335 REPORT/train/REPORT_00357
9335 ALREADY/train/ALREADY_00063
9335 DEBATE/train/DEBATE_00520
9335 MONTH/train/MONTH_00822
9335 DESPITE/train/DESPITE_00205
9335 HAPPEN/train/HAPPEN_00686
9335 PROBLEMS/train/PROBLEMS_00800
9335 THROUGH/train/THROUGH_00588
9335 CLEAR/train/CLEAR_00800
9335 GROWTH/train/GROWTH_00166
9335 CRISIS/train/CRISIS_00145
9335 SERVICES/train/SERVICES_00982
9335 SECTOR/train/SECTOR_00616
9335 HEALTH/train/HEALTH_00093
9335 HOUSE/train/HOUSE_00306
9335 BIGGEST/train/BIGGEST_00889
9335 INFLATION/train/INFLATION_00437
9335 TAKING/train/TAKING_00897
9335 BANKS/train/BANKS_00719
9335 SENIOR/train/SENIOR_00130
9335 ABOUT/train/ABOUT_00299
9335 PERIOD/train/PERIOD_00754
9335 FACING/train/FACING_00174
9335 TALKS/train/TALKS_00898
9335 GERMANY/train/GERMANY_00995
9335 EXTRA/train/EXTRA_00629
9335 PATIENTS/train/PATIENTS_00513
9335 HOMES/train/HOMES_00174
9335 QUESTIONS/train/QUESTIONS_00510
9335 COMES/train/COMES_00218
9335 ECONOMIC/train/ECONOMIC_00967
9335 BETTER/train/BETTER_00304
9335 TODAY/train/TODAY_00250
9335 BECOME/train/BECOME_00767
9335 RETURN/val/RETURN_00032
9335 ENGLAND/train/ENGLAND_00542
9335 DECISION/train/DECISION_00992
9335 PATIENTS/val/PATIENTS_00026
9335 PRICES/train/PRICES_00345
9335 RECENT/train/RECENT_00601
9335 MEETING/train/MEETING_00172
9335 PUBLIC/train/PUBLIC_00802
9335 THOUGHT/train/THOUGHT_00043
9335 NEEDS/train/NEEDS_00339
9335 HOSPITAL/train/HOSPITAL_00032
9335 BRING/train/BRING_00241
9335 BETTER/train/BETTER_00859
9335 STAFF/train/STAFF_00594
9335 CENTRAL/train/CENTRAL_00595
9335 FRANCE/train/FRANCE_00822
9335 FRONT/train/FRONT_00084
9335 MINUTES/train/MINUTES_00169
9335 CHANGES/train/CHANGES_00106
9335 EUROPEAN/train/EUROPEAN_00648
9335 WHETHER/train/WHETHER_00312
9335 THREE/train/THREE_00108
9335 MAJOR/train/MAJOR_00086
9335 OFTEN/train/OFTEN_00216
9335 HEART/train/HEART_00089
9335 EUROPEAN/train/EUROPEAN_00933
9335 GROWTH/train/GROWTH_00942
9335 BANKS/train/BANKS_00497
9335 OFTEN/train/OFTEN_00287
9335 MAYBE/train/MAYBE_00064
9335 STILL/train/STILL_00121
9335 EMERGENCY/train/EMERGENCY_00170
9335 INCREASE/train/INCREASE_00277
9335 POSSIBLE/train/POSSIBLE_00751
9335 CENTRAL/train/CENTRAL_00342
9335 PROBLEM/train/PROBLEM_00718
9335 MONTH/test/MONTH_00041
9335 RATES/train/RATES_00932
9335 REASON/train/REASON_00151
9335 GROWTH/train/GROWTH_00177
9335 HOUSING/train/HOUSING_00621
9335 USING/train/USING_00314
9335 CRISIS/train/CRISIS_00554
9335 GREAT/train/GREAT_00228
9335 ABOUT/train/ABOUT_00640
9335 STILL/train/STILL_00958
9335 DIFFERENCE/train/DIFFERENCE_00079
9335 AROUND/train/AROUND_00387
9335 MEETING/train/MEETING_00828
9335 BEING/train/BEING_00529
9335 DEBATE/train/DEBATE_00485
9335 EUROPE/train/EUROPE_00072
9335 SERVICES/train/SERVICES_00077
9335 INDUSTRY/train/INDUSTRY_00980
9335 MONTHS/train/MONTHS_00727
9335 BENEFIT/train/BENEFIT_00268
9335 PLANS/train/PLANS_00519
9335 CHALLENGE/train/CHALLENGE_00136
9335 CALLED/train/CALLED_00190
9335 CONTROL/train/CONTROL_00558
9335 FRANCE/train/FRANCE_00623
9335 MONTH/train/MONTH_00074
9335 BRITAIN/train/BRITAIN_00621
9335 MEANS/train/MEANS_00343
9335 LATEST/train/LATEST_00510
9335 GLOBAL/train/GLOBAL_00852
9335 BILLION/val/BILLION_00009
9335 THERE/train/THERE_00177
9335 RATES/train/RATES_00676
9335 BUILDING/train/BUILDING_00978
9335 ECONOMIC/train/ECONOMIC_00165
9335 CRISIS/train/CRISIS_00902
9335 BEHIND/train/BEHIND_00200
9335 FRENCH/train/FRENCH_00194
9335 RATHER/train/RATHER_00896
9335 OPPOSITION/train/OPPOSITION_00558
9335 BUILD/train/BUILD_00733
9335 GREECE/train/GREECE_00118
9335 CHANGES/train/CHANGES_00978
9335 PRIME/train/PRIME_00990
9335 FIGURES/train/FIGURES_00142
9335 THEMSELVES/train/THEMSELVES_00233
9335 CRISIS/train/CRISIS_00520
9335 BUDGET/train/BUDGET_00001
9335 HEARD/train/HEARD_00021
9335 WAITING/train/WAITING_00169
9335 RECENT/train/RECENT_00818
9335 WHERE/train/WHERE_00823
9335 BANKS/train/BANKS_00337
9335 TALKING/train/TALKING_00025
9335 BILLION/train/BILLION_00698
9335 MINISTERS/train/MINISTERS_00358
9335 SMALL/train/SMALL_00111
9335 EXAMPLE/train/EXAMPLE_00648
9335 ATTACK/val/ATTACK_00030
9335 AFTER/train/AFTER_00337
9335 INDUSTRY/train/INDUSTRY_00569
9335 THREAT/train/THREAT_00382
9335 MINUTES/train/MINUTES_00529
9335 BEHIND/train/BEHIND_00366
9335 SIGNIFICANT/train/SIGNIFICANT_00360
9335 BROUGHT/train/BROUGHT_00678
9335 HEALTH/train/HEALTH_00227
9335 GETTING/train/GETTING_00732
9335 MEDICAL/test/MEDICAL_00047
9335 NORTHERN/train/NORTHERN_00331
9335 MONEY/train/MONEY_00441
9335 WHETHER/train/WHETHER_00921
9335 REASON/train/REASON_00406
9335 PROBLEMS/train/PROBLEMS_00790
9335 FORWARD/train/FORWARD_00683
9335 BANKS/train/BANKS_00144
9335 GREECE/train/GREECE_00828
9335 DIFFERENT/train/DIFFERENT_00739
9335 INTEREST/train/INTEREST_00787
9335 ASKING/train/ASKING_00348
9335 WHETHER/train/WHETHER_00392
9335 EVERY/train/EVERY_00587
9335 MEASURES/train/MEASURES_00332
9335 COMPANIES/train/COMPANIES_00951
9335 THREAT/train/THREAT_00084
9335 FINANCIAL/train/FINANCIAL_00549
9335 WHILE/train/WHILE_00208
9335 INDUSTRY/train/INDUSTRY_00186
9335 LEADERS/train/LEADERS_00276
9335 EUROPEAN/train/EUROPEAN_00312
9335 BUDGET/train/BUDGET_00778
9335 BUSINESSES/train/BUSINESSES_00674
9335 BANKS/train/BANKS_00135
9335 SOMEONE/train/SOMEONE_00531
9335 COMING/train/COMING_00998
9335 SECTOR/train/SECTOR_00487
9335 OUTSIDE/train/OUTSIDE_00847
9335 GETTING/train/GETTING_00147
9335 LIKELY/train/LIKELY_00977
9335 PRICES/train/PRICES_00677
9335 SHORT/train/SHORT_00709
9335 PRESS/train/PRESS_00573
9335 PROVIDE/train/PROVIDE_00679
9335 GEORGE/train/GEORGE_00321
9335 DEFICIT/train/DEFICIT_00115
9335 AMOUNT/test/AMOUNT_00019
9335 RESULT/train/RESULT_00450
9335 MILLION/train/MILLION_00367
9335 CRISIS/train/CRISIS_00647
9335 CONTINUE/train/CONTINUE_00107
9335 PRIVATE/train/PRIVATE_00515
9335 ACCUSED/train/ACCUSED_00294
9335 THOUSANDS/train/THOUSANDS_00741
9335 WELCOME/train/WELCOME_00864
9335 MESSAGE/train/MESSAGE_00023
9335 GROWTH/train/GROWTH_00091
9335 INTEREST/train/INTEREST_00549
9335 GREECE/train/GREECE_00896
9335 LABOUR/train/LABOUR_00858
9335 BROUGHT/train/BROUGHT_00499
9335 WHETHER/train/WHETHER_00889
9335 CLEAR/train/CLEAR_00841
9335 EXPECTED/train/EXPECTED_00834
9335 MAYBE/train/MAYBE_00300
9335 SECTOR/train/SECTOR_00290
9335 WANTED/train/WANTED_00876
9335 PRETTY/train/PRETTY_00180
9335 CASES/train/CASES_00232
9335 INFLATION/train/INFLATION_00475
9335 RUNNING/train/RUNNING_00071
9335 SITUATION/train/SITUATION_00556
9335 GOING/test/GOING_00035
9335 OTHERS/train/OTHERS_00728
9335 ISSUE/train/ISSUE_00028
9335 THROUGH/train/THROUGH_00787
9335 MARKET/train/MARKET_00778
9335 TAKING/train/TAKING_00289
9335 NUMBER/train/NUMBER_00890
9335 COUPLE/train/COUPLE_00266
9335 COULD/train/COULD_00209
9335 POWERS/train/POWERS_00631
9335 THOSE/train/THOSE_00052
9335 ENGLAND/train/ENGLAND_00666
9335 INTEREST/train/INTEREST_00940
9335 MAJOR/train/MAJOR_00150
9335 SECTOR/train/SECTOR_00674
9335 MINISTERS/train/MINISTERS_00748
9335 ALREADY/train/ALREADY_00078
9335 THROUGH/train/THROUGH_00665
9335 BENEFITS/train/BENEFITS_00771
9335 BEFORE/train/BEFORE_00515
9335 CALLED/train/CALLED_00159
9335 ACTION/test/ACTION_00017
9335 GREAT/train/GREAT_00585
9335 INFLATION/train/INFLATION_00611
9335 WOULD/train/WOULD_00779
9335 DEFICIT/train/DEFICIT_00253
9335 EXAMPLE/val/EXAMPLE_00034
9335 GROWTH/train/GROWTH_00647
9335 USING/train/USING_00207
9335 COUPLE/train/COUPLE_00079
9335 SHORT/train/SHORT_00834
9335 RESULT/train/RESULT_00289
9335 IMPACT/val/IMPACT_00044
9335 PATIENTS/train/PATIENTS_00839
9335 OUTSIDE/train/OUTSIDE_00305
9335 WEEKS/train/WEEKS_00974
9335 MILLIONS/train/MILLIONS_00034
9335 LEAST/train/LEAST_00926
9335 AGAINST/train/AGAINST_00047
9335 UNITED/train/UNITED_00930
9335 POTENTIAL/train/POTENTIAL_00431
9335 DECISION/train/DECISION_00257
9335 SECTOR/train/SECTOR_00046
9335 PLANS/test/PLANS_00028
9335 FINANCIAL/train/FINANCIAL_00507
9335 SPEND/train/SPEND_00638
9335 INFLATION/train/INFLATION_00352
9335 TIMES/train/TIMES_00840
9335 SYSTEM/train/SYSTEM_00237
9335 INTEREST/train/INTEREST_00032
9335 INFLATION/train/INFLATION_00592
9335 MAJOR/train/MAJOR_00290
9335 GROWTH/train/GROWTH_00260
9335 EMERGENCY/train/EMERGENCY_00757
9335 BUDGET/train/BUDGET_00686
9335 CUSTOMERS/train/CUSTOMERS_00250
9335 INVESTMENT/train/INVESTMENT_00205
9335 SAYING/train/SAYING_00878
9335 BEING/train/BEING_00316
9335 CHANGES/train/CHANGES_00675
9335 TERMS/train/TERMS_00582
9335 MINISTER/train/MINISTER_00519
9335 LOCAL/train/LOCAL_00909
9335 SCOTLAND/train/SCOTLAND_00056
9335 FORMER/train/FORMER_00737
9335 ACCESS/train/ACCESS_00717
9335 LEADERSHIP/train/LEADERSHIP_00557
9335 SPENDING/train/SPENDING_00293
9335 IMPACT/train/IMPACT_00446
9335 COMING/train/COMING_00417
9335 WHICH/train/WHICH_00588
9335 HIGHER/train/HIGHER_00045
9335 ECONOMY/train/ECONOMY_00425
9335 POWER/train/POWER_00484
9335 LEADERS/train/LEADERS_00766
9335 COUPLE/train/COUPLE_00242
9335 YEARS/train/YEARS_00029
9335 AHEAD/train/AHEAD_00056
9335 BECAUSE/train/BECAUSE_00629
9335 POSSIBLE/train/POSSIBLE_00436
9335 PRIVATE/train/PRIVATE_00783
9335 LIKELY/train/LIKELY_00985
9335 IRELAND/train/IRELAND_00110
9335 FINANCIAL/train/FINANCIAL_00272
9335 FINANCIAL/train/FINANCIAL_00163
9335 UNTIL/train/UNTIL_00160
9335 WITHIN/train/WITHIN_00317
9335 MONEY/val/MONEY_00020
9335 WEEKS/train/WEEKS_00610
9335 INDUSTRY/train/INDUSTRY_00404
9335 ACTION/train/ACTION_00703
9335 INCREASE/train/INCREASE_00832
9335 INFLATION/train/INFLATION_00438
9335 ALREADY/train/ALREADY_00593
9335 THOSE/train/THOSE_00757
9335 PUBLIC/train/PUBLIC_00649
9335 BANKS/train/BANKS_00167
9335 PRETTY/train/PRETTY_00891
9335 HEART/train/HEART_00177
9335 THERE/train/THERE_00461
9335 FACING/train/FACING_00364
9335 UNDER/train/UNDER_00584
9335 POINT/train/POINT_00239
9335 CLEAR/train/CLEAR_00892
9335 LOCAL/train/LOCAL_00006
9335 RECENT/train/RECENT_00072
9335 MAJOR/train/MAJOR_00043
9335 SIMPLY/train/SIMPLY_00095
9335 INFLATION/train/INFLATION_00202
9335 STILL/train/STILL_00784
9335 GROWTH/train/GROWTH_00693
9335 ISSUES/train/ISSUES_00900
9335 WORKING/train/WORKING_00231
9335 SCOTTISH/train/SCOTTISH_00975
9335 PUBLIC/train/PUBLIC_00341
9335 PRICES/train/PRICES_00675
9335 GROWING/train/GROWING_00692
9335 GOING/train/GOING_00876
9335 LATEST/train/LATEST_00312
9335 CONCERNS/train/CONCERNS_00406
9335 SIDES/test/SIDES_00013
9335 ECONOMIC/train/ECONOMIC_00908
9335 PARLIAMENT/train/PARLIAMENT_00397
9335 MAYBE/train/MAYBE_00190
9335 STAGE/train/STAGE_00722
9335 BANKS/train/BANKS_00338
9335 PRIVATE/train/PRIVATE_00079
9335 INFLATION/train/INFLATION_00214
9335 EXPECTED/train/EXPECTED_00778
9335 WORKING/test/WORKING_00032
9335 MAKES/train/MAKES_00313
9335 DEFICIT/train/DEFICIT_00801
9335 COULD/train/COULD_00181
9335 HAPPENED/train/HAPPENED_00750
9335 PROBLEMS/train/PROBLEMS_00592
9335 LIVING/train/LIVING_00742
9335 CHALLENGE/train/CHALLENGE_00014
9335 INFLATION/train/INFLATION_00410
9335 HOSPITAL/test/HOSPITAL_00025
9335 ALLEGATIONS/train/ALLEGATIONS_00402
9335 MIDDLE/train/MIDDLE_00312
9335 CHIEF/train/CHIEF_00238
9335 CASES/val/CASES_00010
9335 SECTOR/train/SECTOR_00783
9335 WHOLE/train/WHOLE_00453
9335 ASKED/train/ASKED_00360
9335 OFTEN/train/OFTEN_00308
9335 MONEY/train/MONEY_00703
9335 WEEKS/train/WEEKS_00146
9335 GROWTH/train/GROWTH_00183
9335 POLITICIANS/train/POLITICIANS_00007
9335 INVESTMENT/train/INVESTMENT_00007
9335 RATHER/train/RATHER_00514
9335 PRICE/train/PRICE_00788
9335 WESTMINSTER/train/WESTMINSTER_00836
9335 STRONG/train/STRONG_00807
9335 IMPORTANT/train/IMPORTANT_00017
9335 AGREEMENT/test/AGREEMENT_00028
9335 SPEND/train/SPEND_00761
9335 COMPANIES/train/COMPANIES_00219
9335 EXAMPLE/train/EXAMPLE_00677
9335 BEHIND/train/BEHIND_00274
9335 INFLATION/train/INFLATION_00669
9335 THROUGH/train/THROUGH_00510
9335 BEFORE/train/BEFORE_00029
9335 GOING/train/GOING_00736
9335 BECOME/train/BECOME_00283
9335 OFFICIALS/train/OFFICIALS_00823
9335 RATES/train/RATES_00750
9335 SERVICE/train/SERVICE_00481
9335 HOUSE/train/HOUSE_00337
9335 COMPANIES/train/COMPANIES_00909
9335 ECONOMY/train/ECONOMY_00359
9335 INVOLVED/val/INVOLVED_00013
9335 CURRENT/train/CURRENT_00294
9335 CANCER/train/CANCER_00344
9335 CASES/test/CASES_00028
9335 FIGURES/train/FIGURES_00148
9335 AHEAD/train/AHEAD_00512
9335 PATIENTS/train/PATIENTS_00792
9335 EXAMPLE/train/EXAMPLE_00470
9335 PLANS/val/PLANS_00045
9335 AMOUNT/train/AMOUNT_00642
9335 GROUP/train/GROUP_00802
9335 SERVICE/test/SERVICE_00029
9335 WORDS/train/WORDS_00829
9335 TALKS/train/TALKS_00394
9335 ECONOMIC/train/ECONOMIC_00901
9335 AMOUNT/train/AMOUNT_00793
9335 BUSINESSES/train/BUSINESSES_00426
9335 GOVERNMENT/train/GOVERNMENT_00142
9335 KNOWN/train/KNOWN_00151
9335 ENGLAND/train/ENGLAND_00484
9335 THESE/train/THESE_00726
9335 SINGLE/train/SINGLE_00386
9335 EXTRA/train/EXTRA_00808
9335 PROVIDE/train/PROVIDE_00473
9335 MIDDLE/train/MIDDLE_00463
9335 EDUCATION/train/EDUCATION_00965
9335 EVERY/train/EVERY_00961
9335 THERE/train/THERE_00314
9335 BEHIND/train/BEHIND_00521
9335 CONCERNS/train/CONCERNS_00664
9335 POLITICIANS/train/POLITICIANS_00446
9335 SENIOR/train/SENIOR_00790
9335 MONTHS/train/MONTHS_00377
9335 UNION/train/UNION_00336
9335 RUNNING/train/RUNNING_00107
9335 FAMILIES/train/FAMILIES_00373
9335 MINISTERS/train/MINISTERS_00876
9335 DIFFERENT/train/DIFFERENT_00042
9335 HOUSING/train/HOUSING_00920
9335 COMMUNITY/train/COMMUNITY_00481
9335 MEMBERS/train/MEMBERS_00263
9335 CONTINUE/train/CONTINUE_01000
9335 MAKES/train/MAKES_00215
9335 HAPPEN/train/HAPPEN_00333
9335 PATIENTS/train/PATIENTS_00550
9335 TAKING/train/TAKING_00254
9335 ACTION/train/ACTION_00003
9335 LIVES/train/LIVES_00520
9335 WORST/test/WORST_00038
9335 LOOKING/train/LOOKING_00097
9335 SCOTTISH/val/SCOTTISH_00006
9335 FINANCIAL/train/FINANCIAL_00524
9335 THING/train/THING_00874
9335 STREET/train/STREET_00673
9335 SENIOR/train/SENIOR_00994
9335 UNDERSTAND/test/UNDERSTAND_00045
9335 THEIR/train/THEIR_00276
9335 FAMILIES/train/FAMILIES_00432
9335 MANCHESTER/train/MANCHESTER_00890
9335 GROWTH/train/GROWTH_00965
9335 THINGS/train/THINGS_00421
9335 RATES/train/RATES_00805
9335 RATES/train/RATES_00329
9335 INDEPENDENT/train/INDEPENDENT_00636
9335 IMPACT/train/IMPACT_00029
9335 CHILDREN/train/CHILDREN_00880
9335 NATIONAL/train/NATIONAL_00934
9335 LATER/train/LATER_00831
9335 TIMES/train/TIMES_00114
9335 YOUNG/train/YOUNG_00165
9335 ITSELF/train/ITSELF_00999
9335 RUNNING/train/RUNNING_00339
9335 START/train/START_00089
9335 MAYBE/train/MAYBE_00165
9335 WOULD/train/WOULD_00989
9335 WITHOUT/train/WITHOUT_00202
9335 HEALTH/train/HEALTH_00607
9335 PROBLEMS/train/PROBLEMS_00271
9335 PRESSURE/train/PRESSURE_00095
9335 AHEAD/train/AHEAD_00284
9335 MEMBERS/test/MEMBERS_00009
9335 UNTIL/train/UNTIL_00575
9335 QUESTIONS/train/QUESTIONS_00047
9335 ANNOUNCED/train/ANNOUNCED_00114
9335 HOSPITAL/train/HOSPITAL_00703
9335 BANKS/train/BANKS_00895
9335 PATIENTS/test/PATIENTS_00024
9335 GROUND/train/GROUND_00682
9335 FOLLOWING/train/FOLLOWING_00515
9335 UNDER/train/UNDER_00424
9335 ANNOUNCED/train/ANNOUNCED_00295
9335 PLACES/train/PLACES_00388
9335 HAPPENING/train/HAPPENING_00295
9335 REPORT/val/REPORT_00007
9335 NORTHERN/train/NORTHERN_00265
9335 LONDON/train/LONDON_00728
9335 WHICH/train/WHICH_00450
9335 EXPECTED/train/EXPECTED_00720
9335 DEBATE/train/DEBATE_00994
9335 COMES/train/COMES_00245
9335 SOMEONE/train/SOMEONE_00614
9335 PRICE/train/PRICE_00946
9335 FRONT/train/FRONT_00969
9335 AGAIN/train/AGAIN_00370
9335 TOWARDS/train/TOWARDS_00277
9335 BETTER/test/BETTER_00006
9335 FURTHER/val/FURTHER_00049
9335 SHORT/train/SHORT_00060
9335 ALLEGATIONS/train/ALLEGATIONS_00542
9335 PROVIDE/train/PROVIDE_00352
9335 GOVERNMENT/train/GOVERNMENT_00387
9335 ACTUALLY/train/ACTUALLY_00075
9335 CONTROL/train/CONTROL_00165
9335 TOWARDS/train/TOWARDS_00811
9335 UNION/train/UNION_00691
9335 MONTH/train/MONTH_00008
9335 HOSPITAL/train/HOSPITAL_00034
9335 SENIOR/test/SENIOR_00038
9335 HEARD/train/HEARD_00652
9335 GREECE/train/GREECE_00418
9335 SIGNIFICANT/train/SIGNIFICANT_00312
9335 WANTED/train/WANTED_00518
9335 REASON/train/REASON_00050
9335 EVERYBODY/train/EVERYBODY_00863
9335 MARKET/train/MARKET_00397
9335 INTEREST/train/INTEREST_00369
9335 ISSUES/train/ISSUES_00730
9335 EXTRA/val/EXTRA_00036
9335 ISSUE/train/ISSUE_00580
9335 SAYING/train/SAYING_00011
9335 FIGURES/test/FIGURES_00018
9335 INFLATION/train/INFLATION_00366
9335 FACING/train/FACING_00144
9335 GROWTH/train/GROWTH_00580
9335 SEVEN/test/SEVEN_00001
9335 WHETHER/train/WHETHER_00264
9335 WEEKEND/train/WEEKEND_00365
9335 INDUSTRY/train/INDUSTRY_00264
9335 STAGE/train/STAGE_00071
9335 LIVING/train/LIVING_00277
9335 AROUND/train/AROUND_00045
9335 TOWARDS/val/TOWARDS_00013
9335 CHALLENGE/train/CHALLENGE_00189
9335 MAJOR/test/MAJOR_00010
9335 CAMERON/train/CAMERON_00298
9335 GREECE/train/GREECE_00270
9335 MARKET/train/MARKET_00678
9335 RATES/train/RATES_00789
9335 SPENT/train/SPENT_00493
9335 BUSINESSES/train/BUSINESSES_00342
9335 CERTAINLY/train/CERTAINLY_00160
9335 AFFECTED/train/AFFECTED_00538
9335 EXTRA/train/EXTRA_00374
9335 MARKET/train/MARKET_00351
9335 COMPANIES/train/COMPANIES_00660
9335 EARLY/train/EARLY_00320
9335 ATTACK/train/ATTACK_00768
9335 LEAVE/val/LEAVE_00023
9335 PUBLIC/train/PUBLIC_00133
9335 TALKS/train/TALKS_00936
9335 COMING/val/COMING_00029
9335 PRICES/train/PRICES_00151
9335 MINISTERS/train/MINISTERS_00205
9335 OTHER/train/OTHER_00397
9335 YESTERDAY/train/YESTERDAY_00667
9335 LONDON/train/LONDON_00263
9335 NIGHT/train/NIGHT_00230
9335 SINCE/train/SINCE_00404
9335 BILLION/train/BILLION_00045
9335 BIGGEST/train/BIGGEST_00854
9335 WORKERS/train/WORKERS_00800
9335 FUTURE/train/FUTURE_00256
9335 PRIVATE/val/PRIVATE_00025
9335 RESPONSE/train/RESPONSE_00242
9335 PATIENTS/train/PATIENTS_00983
9335 MONEY/train/MONEY_00591
9335 BUSINESSES/train/BUSINESSES_00138
9335 EXPECTED/train/EXPECTED_00280
9335 CONSERVATIVE/train/CONSERVATIVE_00303
9335 EXPECTED/train/EXPECTED_00944
9335 FIGURES/train/FIGURES_00988
9335 HOSPITAL/train/HOSPITAL_00473
9335 HEART/train/HEART_00851
9335 STAGE/train/STAGE_00356
9335 SHORT/train/SHORT_00373
9335 GROUP/train/GROUP_00751
9335 INFLATION/train/INFLATION_00374
9335 GROWTH/train/GROWTH_00253
9335 CAMERON/train/CAMERON_00378
9335 MEDICAL/train/MEDICAL_00330
9335 STAGE/train/STAGE_00519
9335 JAMES/train/JAMES_00042
9335 RUNNING/train/RUNNING_00381
9335 UNTIL/train/UNTIL_00744
9335 SECTOR/train/SECTOR_00356
9335 CURRENT/train/CURRENT_00417
9335 GREECE/train/GREECE_00651
9335 CAMERON/train/CAMERON_00432
9335 DAVID/train/DAVID_00706
9335 ASKED/train/ASKED_00466
9335 INSIDE/train/INSIDE_00295
9335 BUILDING/train/BUILDING_00871
9335 CLEAR/test/CLEAR_00022
9335 NEEDS/train/NEEDS_00758
9335 QUESTIONS/train/QUESTIONS_00069
9335 CONCERNS/train/CONCERNS_00126
9335 SEEMS/train/SEEMS_00145
9335 TALKING/train/TALKING_00783
9335 CANCER/test/CANCER_00019
9335 THOUGHT/train/THOUGHT_00150
9335 INFLATION/train/INFLATION_00602
9335 MILLION/train/MILLION_00664
9335 ISSUE/train/ISSUE_00038
9335 START/train/START_00730
9335 INFLATION/train/INFLATION_00537
9335 YESTERDAY/train/YESTERDAY_00995
9335 INFLATION/train/INFLATION_00589
9335 TAKING/train/TAKING_00409
9335 BUSINESS/train/BUSINESS_00086
9335 PARTS/train/PARTS_00095
9335 PUBLIC/train/PUBLIC_00974
9335 MORNING/train/MORNING_00661
9335 PATIENTS/train/PATIENTS_00284
9335 BIGGEST/train/BIGGEST_00845
9335 THOSE/train/THOSE_00533
9335 GROWING/train/GROWING_00855
9335 PATIENTS/train/PATIENTS_00930
9335 GROWTH/train/GROWTH_00629
9335 COUPLE/train/COUPLE_00656
9335 ECONOMY/train/ECONOMY_00174
9335 PLANS/train/PLANS_01000
9335 INFLATION/train/INFLATION_00545
9335 MAYBE/train/MAYBE_00603
9335 TRYING/train/TRYING_00420
9335 PLACE/train/PLACE_00752
9335 SHORT/train/SHORT_00400
9335 SECTOR/train/SECTOR_00367
9335 TRADE/train/TRADE_00114
9335 INTEREST/train/INTEREST_00679
9335 INFLATION/train/INFLATION_00154
9335 INDUSTRY/train/INDUSTRY_00467
9335 PRIVATE/train/PRIVATE_00502
9335 SOMETHING/train/SOMETHING_00470
9335 CERTAINLY/train/CERTAINLY_00706
9335 SYSTEM/train/SYSTEM_00287
9335 MONTHS/train/MONTHS_00967
9335 LEADERS/train/LEADERS_00728
9335 NEEDS/train/NEEDS_00827
9335 ECONOMY/train/ECONOMY_00360
9335 OFFICE/train/OFFICE_00408
9335 FAMILIES/train/FAMILIES_00364
9335 WORST/train/WORST_00026
9335 INFLATION/train/INFLATION_00186
9335 MIGHT/train/MIGHT_00995
9335 TRADE/train/TRADE_00540
9335 TAKING/train/TAKING_00539
9335 LITTLE/train/LITTLE_00182
9335 BECAUSE/train/BECAUSE_00633
9335 FIGURES/train/FIGURES_00808
9335 PROVIDE/train/PROVIDE_00009
9335 MIGHT/train/MIGHT_00197
9335 THEIR/train/THEIR_00401
9335 LIVING/train/LIVING_00956
9335 ASKED/train/ASKED_00533
9335 PRETTY/train/PRETTY_00881
9335 DIFFERENCE/train/DIFFERENCE_00304
9335 OTHERS/train/OTHERS_00549
9335 GREECE/train/GREECE_00381
9335 WALES/train/WALES_00182
9335 DIFFERENT/train/DIFFERENT_00536
9335 BRING/train/BRING_00565
9335 DIFFICULT/train/DIFFICULT_00911
9335 PLACES/train/PLACES_00789
9335 TIMES/train/TIMES_00303
9335 INTEREST/train/INTEREST_00170
9335 COMPANY/train/COMPANY_00214
9335 TOWARDS/train/TOWARDS_00879
9335 CHANGES/train/CHANGES_00949
9335 OTHER/train/OTHER_00354
9335 GROWTH/train/GROWTH_00189
9335 LATER/train/LATER_00760
9335 AUTHORITIES/train/AUTHORITIES_00344
9335 BEING/train/BEING_00715
9335 SEVEN/train/SEVEN_00610
9335 GROWTH/train/GROWTH_00127
9335 RATES/train/RATES_00739
9335 CONCERNS/train/CONCERNS_00409
9335 SPEAKING/val/SPEAKING_00039
9335 SOCIETY/train/SOCIETY_00527
9335 REMEMBER/train/REMEMBER_00573
9335 HOSPITAL/train/HOSPITAL_00724
9335 GROWTH/train/GROWTH_00350
9335 OFTEN/train/OFTEN_00570
9335 FINANCIAL/train/FINANCIAL_00416
9335 REPORT/train/REPORT_00079
9335 ALMOST/train/ALMOST_00111
9335 SPENDING/train/SPENDING_00421
9335 ECONOMY/train/ECONOMY_00121
9335 AHEAD/train/AHEAD_00474
9335 SINGLE/train/SINGLE_00342
9335 MAYBE/train/MAYBE_00112
9335 MESSAGE/train/MESSAGE_00085
9335 MEMBERS/train/MEMBERS_00743
9335 OFFICIALS/train/OFFICIALS_00240
9335 MIDDLE/train/MIDDLE_00316
9335 BILLION/train/BILLION_00979
9335 ACROSS/train/ACROSS_00769
9335 COUPLE/train/COUPLE_00437
9335 TOWARDS/train/TOWARDS_00725
9335 YEARS/train/YEARS_00074
9335 OUTSIDE/train/OUTSIDE_00268
9335 AGREE/train/AGREE_00707
9335 MAJOR/train/MAJOR_00782
9335 SPENDING/train/SPENDING_00453
9335 STAND/train/STAND_00202
9335 EMERGENCY/val/EMERGENCY_00024
9335 SAYING/train/SAYING_00596
9335 INTEREST/train/INTEREST_00387
9335 SEEMS/train/SEEMS_00880
9335 WHOLE/train/WHOLE_00383
9335 EVIDENCE/train/EVIDENCE_00293
9335 STATE/train/STATE_00761
9335 CALLED/train/CALLED_00545
9335 PROBLEMS/train/PROBLEMS_00095
9335 GIVING/train/GIVING_00842
9335 OFFICIALS/train/OFFICIALS_00846
9335 TIMES/train/TIMES_00909
9335 INFLATION/train/INFLATION_00543
9335 SPENDING/train/SPENDING_00640
9335 FIGURES/train/FIGURES_00961
9335 BORDER/train/BORDER_00791
9335 MAKES/train/MAKES_00031
9335 SIGNIFICANT/train/SIGNIFICANT_00343
9335 HEALTH/train/HEALTH_00647
9335 MILLION/train/MILLION_00074
9335 PRICE/train/PRICE_00779
9335 BROUGHT/train/BROUGHT_00936
9335 ORDER/train/ORDER_00856
9335 EMERGENCY/train/EMERGENCY_00289
9335 UNDER/train/UNDER_00252
9335 PRIVATE/train/PRIVATE_00245
9335 WHOLE/train/WHOLE_00342
9335 WOMEN/train/WOMEN_00994
9335 BETTER/train/BETTER_00893
9335 SUPPORT/train/SUPPORT_00342
9335 DESPITE/train/DESPITE_00539
9335 EXTRA/train/EXTRA_00932
9335 OTHER/train/OTHER_00003
9335 HAPPEN/train/HAPPEN_00926
9335 NUMBERS/train/NUMBERS_00619
9335 AHEAD/train/AHEAD_00444
9335 AREAS/train/AREAS_00015
9335 DEFICIT/train/DEFICIT_00213
9335 AHEAD/train/AHEAD_00692
9335 WELFARE/train/WELFARE_00262
9335 GEORGE/train/GEORGE_00418
9335 TERMS/train/TERMS_00899
9335 SECTOR/train/SECTOR_00183
9335 WHOLE/train/WHOLE_00226
9335 USING/train/USING_00229
9335 COUNTRIES/train/COUNTRIES_00768
9335 NORTHERN/train/NORTHERN_00447
9335 LATEST/train/LATEST_00021
9335 BILLION/train/BILLION_00464
9335 DEFICIT/train/DEFICIT_00012
9335 SIMPLY/train/SIMPLY_00179
9335 ENGLAND/train/ENGLAND_00117
9335 REPORT/train/REPORT_00532
9335 BANKS/train/BANKS_00334
9335 NOTHING/train/NOTHING_00807
9335 HIGHER/train/HIGHER_00420
9335 ENOUGH/train/ENOUGH_00794
9335 STREET/train/STREET_00812
9335 PROVIDE/train/PROVIDE_00399
9335 FUTURE/train/FUTURE_00126
9335 BILLION/train/BILLION_00033
9335 NIGHT/train/NIGHT_00426
9335 ACTUALLY/train/ACTUALLY_00306
9335 TODAY/train/TODAY_00882
9335 DIFFERENT/train/DIFFERENT_00797
9335 MARKET/train/MARKET_00699
9335 OFFICIALS/train/OFFICIALS_00204
9335 ANOTHER/test/ANOTHER_00039
9335 FINANCIAL/train/FINANCIAL_00329
9335 HOMES/train/HOMES_00414
9335 DEBATE/train/DEBATE_00673
9335 PROBABLY/train/PROBABLY_00349
9335 DEFICIT/train/DEFICIT_00812
9335 PLANS/train/PLANS_00959
9335 BUSINESS/train/BUSINESS_00707
9335 LEVEL/train/LEVEL_00275
9335 BEFORE/train/BEFORE_00202
9335 SEVERAL/train/SEVERAL_00395
9335 INFLATION/train/INFLATION_00341
9335 AHEAD/train/AHEAD_00075
9335 BILLION/train/BILLION_00150
9335 SERVICES/train/SERVICES_00770
9335 SIGNIFICANT/train/SIGNIFICANT_00477
9335 POSSIBLE/train/POSSIBLE_00887
9335 MINISTERS/train/MINISTERS_00020
9335 MEASURES/train/MEASURES_00806
9335 TRADE/train/TRADE_00748
9335 TRYING/train/TRYING_00160
9335 MONEY/train/MONEY_00189
9335 YESTERDAY/train/YESTERDAY_00662
9335 OUTSIDE/train/OUTSIDE_00933
9335 BECOME/train/BECOME_00066
9335 NATIONAL/train/NATIONAL_00192
9335 SERVICE/train/SERVICE_00091
9335 RECORD/train/RECORD_00469
9335 RUNNING/train/RUNNING_00219
9335 BROUGHT/train/BROUGHT_00202
9335 ECONOMY/train/ECONOMY_00626
9335 INVESTMENT/train/INVESTMENT_00630
9335 INFLATION/train/INFLATION_00294
9335 PRICES/train/PRICES_00267
9335 TERMS/train/TERMS_00428
9335 INFLATION/train/INFLATION_00363
9335 BANKS/train/BANKS_00931
9335 QUESTIONS/train/QUESTIONS_00771
9335 PATIENTS/train/PATIENTS_00272
9335 WORDS/train/WORDS_00285
9335 SCHOOL/train/SCHOOL_00562
9335 THOUGHT/train/THOUGHT_00284
9335 THREE/val/THREE_00012
9335 SECTOR/train/SECTOR_00906
9335 HAPPENING/test/HAPPENING_00029
9335 CANCER/train/CANCER_00141
9335 GROWTH/train/GROWTH_00359
9335 ANYTHING/train/ANYTHING_00523
9335 PRICES/train/PRICES_00274
9335 HIGHER/train/HIGHER_00883
9335 FIGURES/train/FIGURES_00815
9335 GEORGE/train/GEORGE_00801
9335 LEAST/train/LEAST_00348
9335 INFLATION/train/INFLATION_00728
9335 POSITION/train/POSITION_00743
9335 LONGER/train/LONGER_00282
9335 WAITING/train/WAITING_00523
9335 DIFFERENT/train/DIFFERENT_00113
9335 AHEAD/train/AHEAD_00479
9335 FRENCH/train/FRENCH_00444
9335 QUITE/train/QUITE_00183
9335 SINGLE/train/SINGLE_00658
9335 INFLATION/train/INFLATION_00812
9335 START/train/START_00803
9335 MEASURES/train/MEASURES_00014
9335 PATIENTS/test/PATIENTS_00037
9335 PROVIDE/train/PROVIDE_00222
9335 LATER/train/LATER_00460
9335 REASON/train/REASON_00853
9335 RUNNING/train/RUNNING_00433
9335 MAYBE/train/MAYBE_00015
9335 BENEFITS/train/BENEFITS_00671
9335 THESE/train/THESE_00627
9335 MEASURES/val/MEASURES_00014
9335 CHILD/train/CHILD_00390
9335 PRETTY/train/PRETTY_00931
9335 LEVEL/train/LEVEL_00236
9335 MAYBE/train/MAYBE_00918
9335 ALREADY/train/ALREADY_00366
9335 SIMPLY/train/SIMPLY_00954
9335 TERMS/train/TERMS_00608
9335 PROTECT/train/PROTECT_00122
9335 PATIENTS/train/PATIENTS_00973
9335 FACING/train/FACING_00976
9335 FINANCIAL/train/FINANCIAL_00764
9335 DEATH/train/DEATH_00196
9335 STAFF/train/STAFF_00755
9335 THOUSANDS/train/THOUSANDS_00945
9335 PRICE/train/PRICE_00531
9335 SECOND/train/SECOND_00802
9335 CANCER/val/CANCER_00020
9335 WELFARE/train/WELFARE_00496
9335 COUPLE/train/COUPLE_00316
9335 INDEPENDENT/train/INDEPENDENT_00289
9335 ANNOUNCED/train/ANNOUNCED_00484
9335 QUESTION/train/QUESTION_00382
9335 WANTS/train/WANTS_00223
9335 PARTS/train/PARTS_00047
9335 SPENDING/train/SPENDING_00334
9335 PRICES/train/PRICES_00200
9335 STRONG/train/STRONG_00436
9335 FUTURE/train/FUTURE_00348
9335 REASON/train/REASON_00145
9335 RECENT/train/RECENT_00802
9335 HEART/train/HEART_00549
9335 EMERGENCY/train/EMERGENCY_00707
9335 DEFICIT/train/DEFICIT_00246
9335 GREECE/train/GREECE_00676
9335 RESULT/train/RESULT_00461
9335 STATEMENT/train/STATEMENT_00888
9335 AROUND/train/AROUND_00520
9335 COMPANIES/train/COMPANIES_00139
9335 GROWTH/train/GROWTH_00768
9335 NUMBER/train/NUMBER_00067
9335 MOVING/train/MOVING_00884
9335 DECIDED/train/DECIDED_00782
9335 COURT/train/COURT_00244
9335 SPENT/train/SPENT_00530
9335 HAPPENED/train/HAPPENED_00858
9335 CHALLENGE/train/CHALLENGE_00371
9335 GOING/train/GOING_00724
9335 FINANCIAL/train/FINANCIAL_00421
9335 PRICE/train/PRICE_00765
9335 INFLATION/train/INFLATION_00396
9335 MEDIA/train/MEDIA_00841
9335 FURTHER/train/FURTHER_00005
9335 AHEAD/train/AHEAD_00754
9335 WAITING/train/WAITING_00400
9335 QUESTION/train/QUESTION_00783
9335 QUESTION/test/QUESTION_00010
9335 OTHERS/train/OTHERS_00938
9335 WORDS/train/WORDS_00488
9335 CHANCE/train/CHANCE_00745
9335 AMOUNT/train/AMOUNT_00422
9335 OFTEN/train/OFTEN_00557
9335 THIRD/train/THIRD_00813
9335 UNION/train/UNION_00884
9335 TALKING/train/TALKING_00207
9335 HAVING/train/HAVING_00835
9335 COMPANY/train/COMPANY_00081
9335 SERVICE/train/SERVICE_00399
9335 FORWARD/train/FORWARD_00656
9335 DEBATE/train/DEBATE_00289
9335 SECTOR/train/SECTOR_00815
9335 FIGURES/train/FIGURES_00113
9335 FRENCH/train/FRENCH_00286
9335 BECAUSE/train/BECAUSE_00666
9335 COULD/train/COULD_00261
9335 ACROSS/train/ACROSS_00796
9335 LEVELS/train/LEVELS_00903
9335 LEVELS/train/LEVELS_00041
9335 GOING/train/GOING_00761
9335 AHEAD/train/AHEAD_00304
9335 STATE/train/STATE_00848
9335 SECTOR/train/SECTOR_00642
9335 DIFFERENCE/train/DIFFERENCE_00495
9335 MONEY/train/MONEY_00292
9335 ALMOST/train/ALMOST_00052
9335 MIGHT/train/MIGHT_00946
9335 PRICES/train/PRICES_00499
9335 SENSE/train/SENSE_00981
9335 COMING/train/COMING_00710
9335 YESTERDAY/train/YESTERDAY_00334
9335 INFLATION/train/INFLATION_00658
9335 COMES/train/COMES_00433
9335 ALREADY/train/ALREADY_00662
9335 SIGNIFICANT/train/SIGNIFICANT_00845
9335 THROUGH/train/THROUGH_00592
9335 CHILD/test/CHILD_00009
9335 BRITISH/val/BRITISH_00047
9335 RESPONSE/train/RESPONSE_00304
9335 MOVING/train/MOVING_00780
9335 EXAMPLE/train/EXAMPLE_00451
9335 OTHER/train/OTHER_00414
9335 HAPPENING/train/HAPPENING_00186
9335 BLACK/train/BLACK_00383
9335 BANKS/train/BANKS_00850
9335 LABOUR/train/LABOUR_00790
9335 SPEND/train/SPEND_00143
9335 CERTAINLY/train/CERTAINLY_00122
9335 GROWTH/train/GROWTH_00360
9368 LONGER/train/LONGER_00316
9368 ANOTHER/train/ANOTHER_00687
9368 SENSE/train/SENSE_00425
9368 STILL/val/STILL_00037
9368 JUDGE/train/JUDGE_00537
9368 UNDER/train/UNDER_00160
9368 GERMANY/train/GERMANY_00764
9368 POSSIBLE/train/POSSIBLE_00565
9368 INTEREST/train/INTEREST_00074
9368 EASTERN/train/EASTERN_00524
9368 WEAPONS/train/WEAPONS_00106
9368 MORNING/train/MORNING_00785
9368 PEOPLE/train/PEOPLE_00074
9368 ALLOWED/train/ALLOWED_00640
9368 COUNTRIES/train/COUNTRIES_00938
9368 PARTIES/train/PARTIES_00244
9368 WHOLE/train/WHOLE_00921
9368 LEADERS/train/LEADERS_00109
9368 FIRST/test/FIRST_00034
9368 TOWARDS/train/TOWARDS_00613
9368 SENSE/train/SENSE_00952
9368 RUSSIA/train/RUSSIA_00496
9368 SENSE/train/SENSE_00679
9368 DEATH/train/DEATH_00946
9368 MOVING/train/MOVING_00616
9368 RUSSIAN/train/RUSSIAN_00933
9368 HOUSE/train/HOUSE_00574
9368 ASKING/train/ASKING_00817
9368 DEBATE/train/DEBATE_00656
9368 SECURITY/train/SECURITY_00514
9368 STAGE/train/STAGE_00481
9368 ATTACKS/train/ATTACKS_00147
9368 STATE/train/STATE_00539
9368 SEEMS/train/SEEMS_00336
9368 HOURS/train/HOURS_00825
9368 TRYING/train/TRYING_00767
9368 TOWARDS/train/TOWARDS_00445
9368 FOREIGN/train/FOREIGN_00544
9368 OTHER/train/OTHER_00282
9368 SPEECH/val/SPEECH_00035
9368 RECENT/train/RECENT_00534
9368 WEAPONS/train/WEAPONS_00773
9368 OBAMA/train/OBAMA_00061
9368 COMMUNITY/train/COMMUNITY_00558
9368 RECENT/train/RECENT_00449
9368 TRYING/train/TRYING_00068
9368 GIVEN/train/GIVEN_00116
9368 REALLY/train/REALLY_00132
9368 OPPOSITION/train/OPPOSITION_00010
9368 SERIES/train/SERIES_00805
9368 PRESIDENT/train/PRESIDENT_00369
9368 MIGHT/train/MIGHT_00422
9368 CLEAR/train/CLEAR_00994
9368 FURTHER/train/FURTHER_00226
9368 FRANCE/train/FRANCE_00512
9368 YEARS/train/YEARS_00799
9368 TERMS/train/TERMS_00017
9368 WESTERN/train/WESTERN_00812
9368 POWERS/train/POWERS_00143
9368 STREET/train/STREET_00838
9368 SINGLE/train/SINGLE_00029
9368 WHETHER/train/WHETHER_00250
9368 GERMANY/test/GERMANY_00030
9368 PLACES/train/PLACES_00829
9368 AGAINST/train/AGAINST_00481
9368 THEMSELVES/train/THEMSELVES_00005
9368 ANSWER/train/ANSWER_00171
9368 OTHER/test/OTHER_00004
9368 WEAPONS/train/WEAPONS_00335
9368 TRADE/train/TRADE_00636
9368 SEVEN/val/SEVEN_00048
9368 HEARD/train/HEARD_00218
9368 INFORMATION/train/INFORMATION_00063
9368 LEVELS/train/LEVELS_00526
9368 RUNNING/val/RUNNING_00003
9368 EXPECT/train/EXPECT_00670
9368 MAJOR/train/MAJOR_00416
9368 ABUSE/test/ABUSE_00033
9368 PHONE/train/PHONE_00511
9368 ORDER/train/ORDER_00499
9368 SEEMS/train/SEEMS_00938
9368 STATES/train/STATES_00663
9368 MIDDLE/train/MIDDLE_00900
9368 REALLY/train/REALLY_00571
9368 POWER/train/POWER_00801
9368 OPPOSITION/train/OPPOSITION_00555
9368 MAYBE/train/MAYBE_00676
9368 PEOPLE/train/PEOPLE_00583
9368 BRING/train/BRING_00497
9368 UNTIL/train/UNTIL_00684
9368 THEIR/train/THEIR_00993
9368 BELIEVE/train/BELIEVE_00655
9368 NEEDS/train/NEEDS_00872
9368 VIOLENCE/train/VIOLENCE_00949
9368 CLAIMS/train/CLAIMS_00809
9368 SERVICE/train/SERVICE_00125
9368 PRESIDENT/train/PRESIDENT_00937
9368 EVERYBODY/train/EVERYBODY_00693
9368 WESTERN/train/WESTERN_00435
9368 TONIGHT/train/TONIGHT_00152
9368 SERIOUS/train/SERIOUS_00841
9368 SITUATION/train/SITUATION_00681
9368 AMERICA/train/AMERICA_00443
9368 THEMSELVES/train/THEMSELVES_00846
9368 MESSAGE/train/MESSAGE_00002
9368 POWERS/train/POWERS_00748
9368 AFFAIRS/train/AFFAIRS_00803
9368 SPECIAL/train/SPECIAL_00323
9368 CAMERON/train/CAMERON_00104
9368 EXAMPLE/train/EXAMPLE_00904
9368 DESPITE/train/DESPITE_00260
9368 MIDDLE/train/MIDDLE_00150
9368 TOWARDS/train/TOWARDS_00946
9368 RATHER/train/RATHER_00835
9368 EUROPE/train/EUROPE_00505
9368 ELECTION/train/ELECTION_00219
9368 FORMER/train/FORMER_00249
9368 SUNDAY/train/SUNDAY_00911
9368 EVENTS/train/EVENTS_00397
9368 RECENT/train/RECENT_00200
9368 DOING/train/DOING_00125
9368 OFTEN/train/OFTEN_00767
9368 WESTERN/train/WESTERN_00443
9368 SERVICE/train/SERVICE_00757
9368 RECENT/train/RECENT_00222
9368 WEAPONS/train/WEAPONS_00959
9368 GIVING/val/GIVING_00023
9368 COURSE/train/COURSE_00122
9368 POWERS/test/POWERS_00033
9368 CLOSE/train/CLOSE_00733
9368 FORCES/train/FORCES_00249
9368 SERVICE/train/SERVICE_00863
9368 TOWARDS/train/TOWARDS_00862
9368 STATE/train/STATE_00510
9368 POLITICIANS/train/POLITICIANS_00564
9368 WANTS/train/WANTS_00149
9368 TODAY/train/TODAY_00299
9368 VIOLENCE/train/VIOLENCE_00365
9368 RUSSIA/train/RUSSIA_00291
9368 SHOULD/train/SHOULD_00120
9368 FRENCH/train/FRENCH_00381
9368 BRITAIN/train/BRITAIN_00095
9368 FIGHT/train/FIGHT_00721
9368 CAPITAL/train/CAPITAL_00120
9368 TODAY/train/TODAY_00217
9368 EUROPE/val/EUROPE_00008
9368 THREE/train/THREE_00698
9368 COUPLE/train/COUPLE_00994
9368 SIGNIFICANT/val/SIGNIFICANT_00029
9368 WANTED/train/WANTED_00717
9368 TRYING/train/TRYING_00768
9368 SYRIA/train/SYRIA_00256
9368 MAKES/train/MAKES_00203
9368 PERHAPS/train/PERHAPS_00265
9368 BILLION/train/BILLION_00116
9368 WEAPONS/train/WEAPONS_00286
9368 JUSTICE/train/JUSTICE_00634
9368 STATEMENT/train/STATEMENT_00488
9368 AHEAD/train/AHEAD_00464
9368 BELIEVE/train/BELIEVE_00098
9368 ACTION/train/ACTION_00629
9368 OTHERS/train/OTHERS_00128
9368 WESTERN/train/WESTERN_00389
9368 FORWARD/train/FORWARD_00928
9368 HAPPENING/train/HAPPENING_00171
9368 REALLY/train/REALLY_00889
9368 GREAT/train/GREAT_00680
9368 PRESS/train/PRESS_00554
9368 MEASURES/train/MEASURES_00922
9368 WEAPONS/train/WEAPONS_00454
9368 FRANCE/test/FRANCE_00014
9368 THING/train/THING_00984
9368 SYRIA/train/SYRIA_00873
9368 EASTERN/train/EASTERN_00940
9368 COURSE/train/COURSE_00184
9368 THOUSANDS/train/THOUSANDS_00328
9368 THINGS/train/THINGS_00192
9368 MIGHT/train/MIGHT_00392
9368 GETTING/train/GETTING_00714
9368 GROUND/train/GROUND_00567
9368 DESCRIBED/train/DESCRIBED_00880
9368 COUNTRIES/train/COUNTRIES_00549
9368 LEADER/train/LEADER_00062
9368 FORCES/val/FORCES_00048
9368 BEHIND/train/BEHIND_00168
9368 POSITION/train/POSITION_00490
9368 AUTHORITIES/train/AUTHORITIES_00784
9368 SENSE/val/SENSE_00026
9368 PRIME/train/PRIME_00772
9368 SERIOUS/train/SERIOUS_00955
9368 RUSSIA/train/RUSSIA_00127
9368 RUSSIA/train/RUSSIA_00960
9368 TERMS/train/TERMS_00376
9368 INVESTMENT/train/INVESTMENT_00516
9368 ISSUE/train/ISSUE_00719
9368 WANTS/train/WANTS_00490
9368 FIGHTING/train/FIGHTING_00253
9368 RATHER/train/RATHER_00059
9368 COUNCIL/train/COUNCIL_00203
9368 SUNDAY/train/SUNDAY_00225
9368 WOULD/train/WOULD_00439
9368 CONFLICT/train/CONFLICT_00104
9368 ANSWER/train/ANSWER_00363
9368 THREAT/test/THREAT_00006
9368 GREAT/train/GREAT_00312
9368 SHORT/train/SHORT_00439
9368 FOCUS/train/FOCUS_00123
9368 CLEAR/train/CLEAR_00292
9368 PRESIDENT/train/PRESIDENT_00283
9368 REFERENDUM/train/REFERENDUM_00662
9368 WEEKEND/train/WEEKEND_00251
9368 SIDES/train/SIDES_00652
9368 SENIOR/train/SENIOR_00649
9368 NEVER/train/NEVER_00072
9368 EUROPEAN/train/EUROPEAN_00777
9368 SEEMS/val/SEEMS_00001
9368 TALKS/train/TALKS_00002
9368 WHOLE/train/WHOLE_00996
9368 TALKS/train/TALKS_00932
9368 LEADERS/train/LEADERS_00234
9368 MILITARY/train/MILITARY_00410
9368 EVIDENCE/train/EVIDENCE_00674
9368 HAPPENING/train/HAPPENING_00415
9368 FOREIGN/train/FOREIGN_00694
9368 FORCES/train/FORCES_00348
9368 PROCESS/train/PROCESS_00121
9368 TALKS/train/TALKS_00211
9368 MEETING/train/MEETING_00969
9368 CASES/test/CASES_00049
9368 OBAMA/train/OBAMA_00056
9368 CHANGE/train/CHANGE_00400
9368 MURDER/train/MURDER_00978
9368 COMING/train/COMING_00438
9368 SOMEONE/train/SOMEONE_00110
9368 GROUND/train/GROUND_00931
9368 OFFICIALS/train/OFFICIALS_00030
9368 MIGHT/train/MIGHT_00519
9368 MILITARY/train/MILITARY_00766
9368 WEEKS/train/WEEKS_00991
9368 HEARD/train/HEARD_00210
9368 WEAPONS/train/WEAPONS_00181
9368 THING/train/THING_00056
9368 REASON/train/REASON_00372
9368 OPPOSITION/train/OPPOSITION_00780
9368 OTHERS/train/OTHERS_00025
9368 FRANCE/train/FRANCE_00210
9368 THOUSANDS/train/THOUSANDS_00516
9368 INVOLVED/test/INVOLVED_00035
9368 ALWAYS/train/ALWAYS_00137
9368 MEETING/train/MEETING_00860
9368 THING/train/THING_00306
9368 SERIOUS/train/SERIOUS_00364
9368 CHANCE/train/CHANCE_00069
9368 INQUIRY/train/INQUIRY_00374
9368 THING/train/THING_00888
9368 BEING/train/BEING_00587
9368 ANSWER/train/ANSWER_00700
9368 WANTS/train/WANTS_00259
9368 PARTS/train/PARTS_00268
9368 WHILE/train/WHILE_00060
9368 WRONG/val/WRONG_00038
9368 MEMBERS/train/MEMBERS_00661
9368 NOTHING/train/NOTHING_00266
9368 EXAMPLE/train/EXAMPLE_00804
9368 OTHERS/train/OTHERS_00134
9368 WEAPONS/train/WEAPONS_00014
9368 MOVING/train/MOVING_00026
9368 COURSE/train/COURSE_00044
9368 QUESTIONS/train/QUESTIONS_00130
9368 THOSE/train/THOSE_00599
9368 WANTS/train/WANTS_00064
9368 AMONG/train/AMONG_00584
9368 HOMES/train/HOMES_00188
9368 PRESIDENT/train/PRESIDENT_00421
9368 AMERICA/train/AMERICA_00140
9368 BECAUSE/train/BECAUSE_00998
9368 FOREIGN/train/FOREIGN_00462
9368 RUNNING/train/RUNNING_00318
9368 CLOSE/train/CLOSE_00283
9368 MIDDLE/train/MIDDLE_00658
9368 WANTS/train/WANTS_00375
9368 POLITICAL/test/POLITICAL_00014
9368 SERVICE/train/SERVICE_00238
9368 HAPPENED/val/HAPPENED_00037
9368 THINGS/train/THINGS_00524
9368 CONFLICT/train/CONFLICT_00205
9368 THERE/train/THERE_00710
9368 WEAPONS/train/WEAPONS_00510
9368 SPECIAL/train/SPECIAL_00470
9368 SITUATION/train/SITUATION_00984
9368 WEAPONS/val/WEAPONS_00028
9368 DESPITE/train/DESPITE_00084
9368 OTHER/train/OTHER_00917
9368 COUPLE/train/COUPLE_00279
9368 THESE/test/THESE_00032
9368 MILITARY/train/MILITARY_00100
9368 CONTROL/train/CONTROL_00342
9368 AHEAD/train/AHEAD_00567
9368 WORKING/train/WORKING_00134
9368 SPECIAL/train/SPECIAL_00605
9368 LEADERS/train/LEADERS_00938
9368 ITSELF/train/ITSELF_00447
9368 OBAMA/train/OBAMA_00708
9368 OBAMA/train/OBAMA_00053
9368 SPECIAL/train/SPECIAL_00760
9368 WEEKEND/train/WEEKEND_00513
9368 YEARS/train/YEARS_00765
9368 EXPECTED/train/EXPECTED_00222
9368 UNITED/train/UNITED_00839
9368 WEAPONS/train/WEAPONS_00634
9368 FORCE/train/FORCE_00144
9368 OTHERS/train/OTHERS_00881
9368 EVENING/train/EVENING_00412
9368 UNITED/train/UNITED_00988
9368 HAPPENED/train/HAPPENED_00956
9368 RUSSIAN/train/RUSSIAN_00884
9368 PERHAPS/train/PERHAPS_00742
9368 TALKING/train/TALKING_00614
9368 POLITICAL/train/POLITICAL_00385
9368 MOMENT/train/MOMENT_00825
9368 FORCES/train/FORCES_00393
9368 AGREEMENT/train/AGREEMENT_00183
9368 RUSSIAN/val/RUSSIAN_00030
9368 CONTROL/train/CONTROL_00087
9368 OTHERS/train/OTHERS_00389
9368 INDEPENDENT/train/INDEPENDENT_00972
9368 NUMBER/train/NUMBER_00789
9368 WANTS/train/WANTS_00817
9368 FOREIGN/train/FOREIGN_00343
9368 TOMORROW/train/TOMORROW_00850
9368 OFFICERS/train/OFFICERS_00262
9368 RUSSIAN/train/RUSSIAN_00142
9368 WHOLE/train/WHOLE_00353
9368 LEADERS/train/LEADERS_00014
9368 SPEECH/train/SPEECH_00200
9368 SENSE/train/SENSE_00274
9368 FOREIGN/train/FOREIGN_00793
9368 MISSING/train/MISSING_00840
9368 EVENING/train/EVENING_00806
9368 SENIOR/val/SENIOR_00011
9368 SENIOR/train/SENIOR_00036
9368 TIMES/train/TIMES_00271
9368 BEFORE/train/BEFORE_00463
9368 PRESIDENT/train/PRESIDENT_00445
9368 MAJOR/train/MAJOR_00912
9368 ANNOUNCED/train/ANNOUNCED_00908
9368 ISSUE/train/ISSUE_00331
9368 AFTER/train/AFTER_00771
9368 HAPPEN/train/HAPPEN_00941
9368 PRESIDENT/train/PRESIDENT_00375
9368 DURING/train/DURING_00285
9368 HAPPEN/train/HAPPEN_00937
9368 GIVEN/train/GIVEN_00872
9368 FOLLOWING/train/FOLLOWING_00876
9368 PROBLEM/train/PROBLEM_00420
9368 GETTING/train/GETTING_00824
9368 REALLY/train/REALLY_00437
9368 INVOLVED/train/INVOLVED_00808
9368 RESULT/train/RESULT_00839
9368 EXAMPLE/train/EXAMPLE_00294
9368 FRENCH/train/FRENCH_00588
9368 SOMEONE/train/SOMEONE_00833
9368 THOUGHT/train/THOUGHT_00800
9368 GERMANY/train/GERMANY_00360
9368 SECTOR/train/SECTOR_00856
9368 BROUGHT/train/BROUGHT_00479
9368 QUESTION/train/QUESTION_00191
9368 CRISIS/train/CRISIS_00436
9368 GROUND/train/GROUND_00017
9368 UNDER/train/UNDER_00464
9368 LEADERS/train/LEADERS_00178
9368 GROUND/train/GROUND_00763
9368 CHILD/test/CHILD_00011
9368 YESTERDAY/train/YESTERDAY_00810
9368 RUSSIAN/train/RUSSIAN_00233
9368 FUTURE/train/FUTURE_00226
9368 HAPPENING/train/HAPPENING_00531
9368 COUNCIL/train/COUNCIL_00267
9368 MEMBERS/train/MEMBERS_00881
9368 HEARD/val/HEARD_00035
9368 WEAPONS/train/WEAPONS_00261
9368 AMERICAN/train/AMERICAN_00767
9368 RESPONSE/train/RESPONSE_00324
9368 SERIOUS/train/SERIOUS_00478
9368 FIGHT/train/FIGHT_00210
9368 OTHER/train/OTHER_00328
9368 FUTURE/train/FUTURE_00204
9368 GIVEN/train/GIVEN_00356
9368 AMONG/train/AMONG_00690
9368 BECOME/train/BECOME_01000
9368 THREAT/train/THREAT_00946
9368 PRESS/train/PRESS_00541
9368 BRITAIN/train/BRITAIN_00018
9368 DECISION/train/DECISION_00716
9368 VIOLENCE/train/VIOLENCE_00142
9368 ISLAMIC/train/ISLAMIC_00204
9368 RATHER/train/RATHER_00956
9368 UNDER/train/UNDER_00098
9368 MAJORITY/train/MAJORITY_00800
9368 AMERICAN/train/AMERICAN_00499
9368 ALLOW/train/ALLOW_00132
9368 MEMBER/train/MEMBER_00240
9368 OTHER/train/OTHER_00446
9368 HAPPEN/train/HAPPEN_00653
9368 MILITARY/train/MILITARY_00370
9368 PROCESS/train/PROCESS_00606
9368 CONFERENCE/train/CONFERENCE_00336
9368 MEETING/train/MEETING_00326
9368 OBAMA/train/OBAMA_00777
9368 MIGHT/train/MIGHT_00466
9368 ATTACKS/train/ATTACKS_00476
9368 STATEMENT/train/STATEMENT_00833
9368 THESE/train/THESE_00479
9368 EVENTS/train/EVENTS_00158
9368 FRENCH/train/FRENCH_00896
9368 SENSE/train/SENSE_00923
9368 ISLAMIC/train/ISLAMIC_00683
9368 ITSELF/train/ITSELF_00084
9368 QUESTION/train/QUESTION_00446
9368 WITHOUT/train/WITHOUT_00598
9368 MEDICAL/train/MEDICAL_00375
9368 SINGLE/train/SINGLE_00285
9368 SOMETHING/train/SOMETHING_00432
9368 AFTERNOON/train/AFTERNOON_00439
9368 NEVER/train/NEVER_00292
9368 HAVING/train/HAVING_00093
9368 GIVEN/train/GIVEN_00459
9368 EXAMPLE/train/EXAMPLE_00579
9368 AGREEMENT/test/AGREEMENT_00006
9368 ORDER/test/ORDER_00023
9368 SIDES/train/SIDES_00019
9368 EVERYTHING/train/EVERYTHING_00184
9368 HAPPEN/train/HAPPEN_00322
9368 MEMBERS/train/MEMBERS_00181
9368 HUMAN/train/HUMAN_00341
9368 AREAS/train/AREAS_00517
9368 LEVEL/train/LEVEL_00251
9368 OBAMA/train/OBAMA_00693
9368 RUSSIAN/train/RUSSIAN_00161
9368 DIFFERENT/train/DIFFERENT_00098
9368 CHANCE/train/CHANCE_00832
9368 COURSE/train/COURSE_00065
9368 STATES/train/STATES_00810
9368 CURRENT/train/CURRENT_00325
9368 ISSUES/train/ISSUES_00816
9368 OPERATION/train/OPERATION_00258
9368 COUNCIL/train/COUNCIL_00480
9368 MATTER/train/MATTER_00308
9368 SPECIAL/train/SPECIAL_00734
9368 PROBLEM/train/PROBLEM_00758
9368 UNDERSTAND/train/UNDERSTAND_00086
9368 SECURITY/train/SECURITY_00254
9368 ACTUALLY/train/ACTUALLY_00644
9368 EASTERN/train/EASTERN_00271
9368 INVOLVED/train/INVOLVED_00419
9368 SAYING/train/SAYING_00277
9368 WEAPONS/train/WEAPONS_00615
9368 INSIDE/train/INSIDE_00578
9368 QUESTION/train/QUESTION_00460
9368 THREAT/train/THREAT_00458
9368 HEARD/train/HEARD_00754
9368 GERMANY/train/GERMANY_00102
9368 GROUND/train/GROUND_00014
9368 FOREIGN/train/FOREIGN_00219
9368 INTEREST/train/INTEREST_00734
9368 OFFICIALS/train/OFFICIALS_00888
9368 BECOME/test/BECOME_00019
9368 WITHOUT/train/WITHOUT_00834
9368 CHANCE/train/CHANCE_00527
9368 UNDERSTAND/train/UNDERSTAND_00660
9368 WEAPONS/train/WEAPONS_00032
9368 ANYTHING/train/ANYTHING_00592
9368 RECENT/train/RECENT_00053
9368 PROCESS/train/PROCESS_00600
9368 TRADE/train/TRADE_00040
9368 HOUSE/train/HOUSE_00936
9368 KILLED/val/KILLED_00028
9368 WORKING/train/WORKING_00846
9368 WESTERN/train/WESTERN_00980
9368 EVENING/train/EVENING_00193
9368 GROUND/train/GROUND_00371
9368 EXAMPLE/train/EXAMPLE_00190
9368 WORLD/train/WORLD_00951
9368 NUMBER/train/NUMBER_00620
9368 THROUGH/train/THROUGH_00931
9368 RUSSIAN/train/RUSSIAN_00385
9368 WOULD/train/WOULD_00771
9368 NORTH/test/NORTH_00003
9368 EXPECT/train/EXPECT_00668
9368 MILITARY/train/MILITARY_00264
9368 WHETHER/train/WHETHER_00041
9368 PHONE/train/PHONE_00032
9368 ACTION/train/ACTION_00418
9368 MOVING/train/MOVING_00270
9368 BORDER/train/BORDER_00712
9368 EXAMPLE/train/EXAMPLE_00249
9368 TONIGHT/train/TONIGHT_00972
9368 WEEKS/train/WEEKS_00441
9368 SYRIA/train/SYRIA_00937
9368 CAPITAL/train/CAPITAL_00874
9368 THING/train/THING_00421
9368 OPERATION/train/OPERATION_00734
9368 SYRIA/train/SYRIA_00712
9368 RUSSIAN/train/RUSSIAN_00894
9368 THING/train/THING_00690
9368 THING/train/THING_00344
9368 EXAMPLE/train/EXAMPLE_00276
9368 LEGAL/train/LEGAL_00736
9368 COURSE/train/COURSE_00904
9368 SEVERAL/train/SEVERAL_00362
9368 FIGURES/test/FIGURES_00010
9368 AFFAIRS/train/AFFAIRS_00830
9368 START/train/START_00635
9368 LEADERS/train/LEADERS_00171
9368 PERHAPS/train/PERHAPS_00825
9368 STREET/train/STREET_00602
9368 BUILD/train/BUILD_00632
9368 AMONG/test/AMONG_00023
9368 MIGHT/train/MIGHT_00983
9368 MEMBER/train/MEMBER_00794
9368 OBAMA/train/OBAMA_00462
9368 EASTERN/train/EASTERN_00097
9368 SECRETARY/train/SECRETARY_00353
9368 PROCESS/train/PROCESS_00167
9368 GUILTY/train/GUILTY_00438
9368 CLEAR/train/CLEAR_00713
9368 INVOLVED/train/INVOLVED_00754
9368 SPEECH/train/SPEECH_00208
9368 WORKING/train/WORKING_00991
9368 PEOPLE/train/PEOPLE_00334
9368 COUNCIL/train/COUNCIL_00583
9368 GIVEN/train/GIVEN_00082
9368 COUNTRIES/train/COUNTRIES_00182
9368 MIGHT/train/MIGHT_00379
9368 THROUGH/train/THROUGH_00474
9368 ALMOST/train/ALMOST_00774
9368 SYRIAN/val/SYRIAN_00038
9368 AROUND/train/AROUND_00835
9368 COURT/train/COURT_00676
9368 FORCES/train/FORCES_00021
9368 HAVING/train/HAVING_00005
9368 EXAMPLE/train/EXAMPLE_00478
9368 PARLIAMENT/train/PARLIAMENT_00436
9368 BRITAIN/train/BRITAIN_00115
9368 COULD/train/COULD_00853
9368 GIVING/train/GIVING_00866
9368 WEEKS/train/WEEKS_00261
9368 FUTURE/train/FUTURE_00809
9368 RUSSIAN/train/RUSSIAN_00755
9368 NEVER/train/NEVER_00471
9368 SYRIAN/train/SYRIAN_00688
9368 PHONE/train/PHONE_00553
9368 RECENT/train/RECENT_00375
9368 TODAY/train/TODAY_00456
9368 SPEECH/train/SPEECH_00152
9368 EASTERN/train/EASTERN_00416
9368 CONTROL/train/CONTROL_00743
9368 WHERE/train/WHERE_00951
9368 RUSSIAN/train/RUSSIAN_00185
9368 MAYBE/train/MAYBE_00401
9368 TALKS/train/TALKS_00486
9368 LEGAL/train/LEGAL_00584
9368 COUNTRIES/train/COUNTRIES_00180
9368 PROCESS/train/PROCESS_00517
9368 REASON/train/REASON_00367
9368 SOUTHERN/train/SOUTHERN_00183
9368 QUESTION/train/QUESTION_00678
9368 SUNDAY/train/SUNDAY_00441
9368 GERMANY/train/GERMANY_00562
9368 STILL/train/STILL_00646
9368 RESULT/train/RESULT_00816
9368 VIOLENCE/train/VIOLENCE_00438
9368 COMMUNITY/train/COMMUNITY_00017
9368 FORMER/train/FORMER_00875
9368 OTHER/val/OTHER_00014
9368 QUESTIONS/train/QUESTIONS_00463
9368 THINGS/train/THINGS_00638
9368 THOUGHT/train/THOUGHT_00442
9368 SECURITY/train/SECURITY_00858
9368 SEEMS/train/SEEMS_00679
9368 FRANCE/train/FRANCE_00768
9368 JUSTICE/train/JUSTICE_00052
9368 POLITICAL/train/POLITICAL_00042
9368 SITUATION/train/SITUATION_00443
9368 WORDS/train/WORDS_00675
9368 WANTS/train/WANTS_00030
9368 GETTING/val/GETTING_00024
9368 RUSSIA/train/RUSSIA_00849
9368 GIVEN/train/GIVEN_00062
9368 AGREEMENT/test/AGREEMENT_00034
9368 PRESIDENT/train/PRESIDENT_00029
9368 DOING/train/DOING_00798
9368 ASKING/train/ASKING_00907
9368 STREET/train/STREET_00740
9368 MEETING/train/MEETING_00990
9368 WEAPONS/train/WEAPONS_00245
9368 CHILDREN/train/CHILDREN_00062
9368 LEGAL/train/LEGAL_00250
9368 ITSELF/test/ITSELF_00026
9368 NIGHT/val/NIGHT_00042
9368 EVIDENCE/train/EVIDENCE_00446
9368 FRIDAY/train/FRIDAY_00965
9368 FORCES/train/FORCES_00062
9368 WEAPONS/train/WEAPONS_00849
9368 BECOME/train/BECOME_00390
9368 MASSIVE/train/MASSIVE_00101
9368 TOMORROW/train/TOMORROW_00408
9368 OBAMA/train/OBAMA_00140
9368 LITTLE/train/LITTLE_00965
9368 THROUGH/train/THROUGH_00202
9368 THOUGHT/train/THOUGHT_00805
9368 HEARD/train/HEARD_00464
9368 SIDES/train/SIDES_00819
9368 MILITARY/train/MILITARY_00435
9368 INVOLVED/train/INVOLVED_00428
9368 UNION/train/UNION_00160
9368 TODAY/train/TODAY_00157
9368 AMONG/train/AMONG_00121
9368 SMALL/train/SMALL_00543
9368 BEHIND/train/BEHIND_00588
9368 SPEAKING/train/SPEAKING_00278
9368 SCHOOLS/train/SCHOOLS_00422
9368 BUSINESS/train/BUSINESS_00824
9368 COUNTRIES/train/COUNTRIES_00024
9368 LOOKING/val/LOOKING_00031
9368 ASKING/train/ASKING_00238
9368 MAKES/train/MAKES_00192
9368 ABSOLUTELY/train/ABSOLUTELY_00861
9368 MAJORITY/train/MAJORITY_00494
9368 ALREADY/train/ALREADY_00186
9368 YOUNG/train/YOUNG_00268
9368 FRANCE/train/FRANCE_00812
9368 AFTERNOON/train/AFTERNOON_00934
9368 STAGE/val/STAGE_00043
9368 ACTION/train/ACTION_00236
9368 SOMETHING/train/SOMETHING_00948
9368 POSSIBLE/train/POSSIBLE_00975
9368 WEAPONS/train/WEAPONS_00135
9368 WATCHING/train/WATCHING_00191
9368 EVENING/train/EVENING_00035
9368 FOREIGN/train/FOREIGN_00452
9368 CONTROL/train/CONTROL_00364
9368 CHARGES/train/CHARGES_00360
9368 MILITARY/train/MILITARY_00786
9368 OFTEN/train/OFTEN_00694
9368 OTHER/train/OTHER_00990
9368 EVIDENCE/train/EVIDENCE_00208
9368 THROUGH/train/THROUGH_00574
9368 LITTLE/train/LITTLE_00708
9368 AMERICA/train/AMERICA_00034
9368 WEAPONS/val/WEAPONS_00007
9368 RUSSIA/train/RUSSIA_00760
9368 GOING/train/GOING_00767
9368 BROUGHT/train/BROUGHT_00713
9368 MILITARY/train/MILITARY_00151
9368 CHANGE/train/CHANGE_00801
9368 AFTERNOON/val/AFTERNOON_00029
9368 SENSE/train/SENSE_00297
9368 SEEMS/train/SEEMS_00221
9368 REASON/train/REASON_00431
9368 WEAPONS/train/WEAPONS_00098
9368 DIFFICULT/train/DIFFICULT_00897
9368 STATES/train/STATES_00889
9368 NIGHT/train/NIGHT_00670
9368 HAPPEN/train/HAPPEN_00373
9368 CONFLICT/train/CONFLICT_00447
9368 START/train/START_00621
9368 SENIOR/test/SENIOR_00003
9368 OFFICIALS/train/OFFICIALS_00944
9368 DESCRIBED/train/DESCRIBED_00063
9368 ITSELF/train/ITSELF_00992
9368 HAPPEN/train/HAPPEN_00796
9368 SERIOUS/train/SERIOUS_00162
9368 UNDER/train/UNDER_00449
9368 AFTERNOON/train/AFTERNOON_00227
9368 THERE/train/THERE_00007
9368 ENOUGH/train/ENOUGH_00800
9368 ACTUALLY/train/ACTUALLY_00578
9368 ACROSS/train/ACROSS_00814
9368 OFFICE/train/OFFICE_00064
9368 CONFERENCE/train/CONFERENCE_00735
9368 QUESTIONS/train/QUESTIONS_00251
9368 AFFECTED/train/AFFECTED_00079
9368 THERE/train/THERE_00324
9368 GIVEN/train/GIVEN_00892
9368 THERE/train/THERE_00800
9368 ANSWER/train/ANSWER_00034
9368 STRONG/train/STRONG_00519
9368 ACTION/train/ACTION_00772
9368 RUSSIAN/train/RUSSIAN_00531
9368 STATEMENT/train/STATEMENT_00452
9368 CHANGE/train/CHANGE_00163
9368 COULD/train/COULD_00950
9368 AMERICAN/train/AMERICAN_00430
9368 VIOLENCE/train/VIOLENCE_00998
9368 OPPOSITION/train/OPPOSITION_00258
9368 COUNCIL/train/COUNCIL_00891
9368 AMOUNT/train/AMOUNT_00293
9368 SYRIA/train/SYRIA_00061
9368 MAKING/train/MAKING_00407
9368 PRESIDENT/train/PRESIDENT_00649
9368 GERMANY/train/GERMANY_00491
9368 ALLOW/val/ALLOW_00035
9368 BETWEEN/test/BETWEEN_00014
9368 CONSERVATIVE/train/CONSERVATIVE_00704
9368 EXAMPLE/train/EXAMPLE_00778
9368 BROUGHT/train/BROUGHT_00590
9368 OBAMA/train/OBAMA_00716
9368 AMERICAN/val/AMERICAN_00039
9368 POSSIBLE/train/POSSIBLE_00511
9368 MINISTER/train/MINISTER_00090
9368 ORDER/train/ORDER_00489
9368 BRITISH/train/BRITISH_00016
9368 PERHAPS/train/PERHAPS_00601
9368 ABSOLUTELY/train/ABSOLUTELY_00844
9368 PERHAPS/train/PERHAPS_00717
9368 DOING/train/DOING_00421
9368 ANSWER/train/ANSWER_00931
9368 PROCESS/train/PROCESS_00384
9368 REALLY/train/REALLY_00491
9368 SYRIA/train/SYRIA_00863
9368 SIDES/train/SIDES_00802
9368 SAYING/train/SAYING_00096
9368 CALLED/val/CALLED_00006
9368 FRONT/train/FRONT_00097
9368 CLOSE/train/CLOSE_00966
9368 MILITARY/train/MILITARY_00629
9368 MILITARY/train/MILITARY_00449
9368 REALLY/train/REALLY_00356
9368 OPPOSITION/train/OPPOSITION_00748
9368 MURDER/train/MURDER_00281
9368 WEAPONS/train/WEAPONS_00785
9368 GEORGE/train/GEORGE_00912
9368 BEING/train/BEING_00018
9368 MESSAGE/train/MESSAGE_00115
9368 LEVELS/train/LEVELS_00308
9368 REPORT/train/REPORT_00271
9368 VIOLENCE/train/VIOLENCE_00843
9368 AREAS/val/AREAS_00018
9368 MARKET/train/MARKET_00772
9368 QUESTIONS/val/QUESTIONS_00009
9368 PRISON/train/PRISON_00328
9368 MARKET/train/MARKET_00248
9368 PARTIES/train/PARTIES_00702
9368 EVENTS/val/EVENTS_00049
9368 DESPITE/val/DESPITE_00033
9368 HEAVY/train/HEAVY_00136
9368 FORWARD/train/FORWARD_00236
9368 ABOUT/train/ABOUT_00891
9368 FRANCE/train/FRANCE_00543
9368 SECRETARY/train/SECRETARY_00455
9368 TRYING/train/TRYING_00865
9368 SINGLE/train/SINGLE_00169
9368 PRESSURE/train/PRESSURE_00822
9368 THING/train/THING_00105
9368 CRISIS/train/CRISIS_00065
9368 GIVING/train/GIVING_00046
9368 TAKING/train/TAKING_00709
9368 MINISTER/train/MINISTER_00268
9368 LOCAL/val/LOCAL_00013
9368 FUTURE/train/FUTURE_00917
9368 PROCESS/train/PROCESS_00138
9368 SIDES/train/SIDES_00618
9368 FOREIGN/train/FOREIGN_00899
9368 DIFFERENCE/train/DIFFERENCE_00011
9368 HEART/train/HEART_00740
9368 EVENTS/train/EVENTS_00632
9368 TODAY/train/TODAY_00039
9368 ALREADY/train/ALREADY_00736
9368 SIGNIFICANT/train/SIGNIFICANT_00421
9368 POWERS/train/POWERS_00481
9368 SECURITY/train/SECURITY_00503
9368 PLACES/train/PLACES_00319
9368 SERVICE/train/SERVICE_00732
9368 POWERS/train/POWERS_00863
9368 THERE/train/THERE_00011
9368 OPPOSITION/train/OPPOSITION_00631
9368 REPORTS/train/REPORTS_00391
9368 MEMBERS/train/MEMBERS_00549
9368 SUPPORT/train/SUPPORT_00163
9368 OTHERS/train/OTHERS_00889
9368 VIOLENCE/train/VIOLENCE_00119
9368 MINUTES/train/MINUTES_00134
9368 HAPPENING/train/HAPPENING_00385
9368 SENIOR/train/SENIOR_00297
9368 CONTINUE/train/CONTINUE_00665
9368 WITHIN/train/WITHIN_00427
9368 SOUTH/train/SOUTH_00905
9368 COUPLE/train/COUPLE_00772
9368 HAPPENED/train/HAPPENED_00222
9368 SIDES/train/SIDES_00193
9368 RUSSIAN/train/RUSSIAN_00053
9368 POLITICIANS/train/POLITICIANS_00127
9368 SOMETHING/val/SOMETHING_00031
9368 SIDES/train/SIDES_00013
9368 BETTER/train/BETTER_00387
9368 TALKING/train/TALKING_00205
9368 CLEAR/train/CLEAR_00369
9368 BUSINESS/train/BUSINESS_00731
9368 RUSSIA/train/RUSSIA_00423
9368 VIOLENCE/train/VIOLENCE_00786
9368 FORCES/train/FORCES_00324
9368 AMONG/train/AMONG_00629
9368 RUSSIAN/train/RUSSIAN_00546
9368 AMERICAN/train/AMERICAN_00996
9368 BROUGHT/train/BROUGHT_00339
9368 BROUGHT/train/BROUGHT_00834
9368 OFFICE/train/OFFICE_00627
9368 HEARD/train/HEARD_00648
9368 PROBLEM/train/PROBLEM_00923
9368 KILLED/train/KILLED_00057
9368 UNDER/train/UNDER_00801
9368 ATTACKS/train/ATTACKS_00552
9368 REPORT/train/REPORT_00803
9368 WORDS/train/WORDS_00357
9368 MIDDLE/train/MIDDLE_00516
9368 AGREEMENT/train/AGREEMENT_00353
9368 DECISION/train/DECISION_00935
9368 PEOPLE/train/PEOPLE_00486
9368 PROTECT/train/PROTECT_00894
9368 MEDIA/train/MEDIA_00728
9368 CHANCE/train/CHANCE_00372
9368 MEETING/train/MEETING_00588
9368 STREET/train/STREET_00445
9368 EUROPE/train/EUROPE_00199
9368 POSITION/train/POSITION_00376
9368 EXAMPLE/train/EXAMPLE_00806
9368 MAKING/train/MAKING_00292
9368 SINCE/train/SINCE_00860
9368 ATTACKS/train/ATTACKS_00305
9368 HIGHER/train/HIGHER_00352
9368 COUNCIL/train/COUNCIL_00282
9368 OPPOSITION/train/OPPOSITION_00049
9368 RECENT/train/RECENT_00796
9368 CONFLICT/train/CONFLICT_00574
9368 OTHERS/train/OTHERS_00829
9368 PERHAPS/train/PERHAPS_00814
9368 EVENING/train/EVENING_00971
9368 MONTHS/train/MONTHS_00638
9368 ATTACKS/train/ATTACKS_00336
9368 PROBLEMS/train/PROBLEMS_00690
9368 CLOSE/train/CLOSE_00065
9368 SPEND/train/SPEND_00481
9368 POSITION/train/POSITION_00159
9368 THREE/train/THREE_00860
9368 HAPPENED/train/HAPPENED_00424
9368 QUESTION/train/QUESTION_00892
9368 SUNDAY/train/SUNDAY_00152
9368 LEADERS/train/LEADERS_00152
9368 HEART/train/HEART_00473
9368 STARTED/train/STARTED_00260
9368 CONFERENCE/train/CONFERENCE_00711
9368 MURDER/train/MURDER_00678
9368 WESTERN/train/WESTERN_00005
9368 INVOLVED/train/INVOLVED_00603
9368 COURSE/train/COURSE_00851
9368 COUPLE/train/COUPLE_00879
9368 COURSE/train/COURSE_00721
9368 AMONG/train/AMONG_00290
9368 PRESIDENT/train/PRESIDENT_00598
9368 UNDER/train/UNDER_00285
9368 SUPPORT/train/SUPPORT_00774
9368 CONTROL/train/CONTROL_00497
9368 COUNTRIES/train/COUNTRIES_00415
9368 PRIVATE/train/PRIVATE_00268
9368 DIFFICULT/train/DIFFICULT_00921
9368 WHOLE/train/WHOLE_00380
9368 THOUGHT/train/THOUGHT_00366
9368 FOREIGN/train/FOREIGN_00550
9368 INVOLVED/val/INVOLVED_00012
9368 FOREIGN/train/FOREIGN_00148
9368 EXAMPLE/train/EXAMPLE_00274
9368 PRESIDENT/train/PRESIDENT_00317
9368 MIGHT/train/MIGHT_00352
9368 POSITION/train/POSITION_00496
9368 SPECIAL/train/SPECIAL_00381
9368 FORCES/train/FORCES_00843
9368 FORWARD/train/FORWARD_00967
9368 RUSSIAN/train/RUSSIAN_00569
9368 POSITION/train/POSITION_00040
9368 AGREE/train/AGREE_00683
9368 HAPPEN/train/HAPPEN_00048
9368 CHARGE/train/CHARGE_00510
9368 POINT/train/POINT_00511
9368 RESPONSE/train/RESPONSE_00243
9368 WEEKS/train/WEEKS_00045
9368 GUILTY/train/GUILTY_00570
9368 FORCES/train/FORCES_00298
9368 RATHER/train/RATHER_00525
9368 FOREIGN/train/FOREIGN_00336
9368 POSITION/train/POSITION_00409
9368 CHINA/test/CHINA_00028
9368 MILITARY/train/MILITARY_00445
9368 EUROPEAN/train/EUROPEAN_00901
9368 COUNCIL/train/COUNCIL_00680
9368 SEEMS/train/SEEMS_00054
9368 FORCES/train/FORCES_00938
9368 POLICY/test/POLICY_00048
9368 CONTROL/train/CONTROL_00518
9368 LOCAL/train/LOCAL_00398
9368 MONEY/train/MONEY_00876
9368 SECOND/train/SECOND_00674
9368 NATIONAL/train/NATIONAL_00721
9368 BLACK/train/BLACK_00243
9368 CERTAINLY/train/CERTAINLY_00543
9368 CENTRAL/train/CENTRAL_00215
9368 MEDIA/train/MEDIA_00031
9368 TODAY/train/TODAY_00466
9368 COUNCIL/train/COUNCIL_00934
9368 STATE/train/STATE_00429
9368 ACROSS/train/ACROSS_00036
9368 MEETING/train/MEETING_00676
9368 SERVICE/train/SERVICE_00965
9368 SAYING/train/SAYING_00328
9368 REPORTS/train/REPORTS_00217
9368 START/train/START_00385
9368 EVIDENCE/train/EVIDENCE_00186
9368 SPEECH/train/SPEECH_00715
9368 WHICH/train/WHICH_00273
9368 SEVERAL/train/SEVERAL_00414
9368 WESTMINSTER/train/WESTMINSTER_00607
9368 SMALL/val/SMALL_00005
9368 FORCES/train/FORCES_00501
9368 LEAST/train/LEAST_00723
9368 MAJORITY/train/MAJORITY_00325
9368 SINCE/train/SINCE_00030
9368 BEING/train/BEING_00183
9368 CHANGE/train/CHANGE_00301
9368 EXAMPLE/train/EXAMPLE_00650
9368 AHEAD/train/AHEAD_00767
9368 WHETHER/train/WHETHER_00164
9368 OPPOSITION/train/OPPOSITION_00011
9368 AFTERNOON/train/AFTERNOON_00718
9368 SEVERAL/train/SEVERAL_00872
9368 LITTLE/train/LITTLE_00673
9368 MILITARY/test/MILITARY_00008
9368 FORCE/train/FORCE_00188
9368 MILITARY/train/MILITARY_00510
9368 EUROPEAN/train/EUROPEAN_00613
9368 COUPLE/train/COUPLE_00760
9368 PLACE/train/PLACE_00071
9368 OPERATION/train/OPERATION_00773
9368 MINISTERS/train/MINISTERS_00742
9368 FOREIGN/train/FOREIGN_00417
9368 CENTRAL/train/CENTRAL_00344
9368 PRESIDENT/train/PRESIDENT_00195
9368 STILL/train/STILL_00759
9368 RECENT/train/RECENT_00910
9368 LONDON/train/LONDON_00419
9368 ALLOW/train/ALLOW_00625
9438 MEMBER/train/MEMBER_00187
9438 INFLATION/train/INFLATION_00711
9438 OFFICIALS/train/OFFICIALS_00575
9438 BENEFITS/train/BENEFITS_00447
9438 REFERENDUM/train/REFERENDUM_00260
9438 WHILE/train/WHILE_00731
9438 WALES/train/WALES_00073
9438 BUILDING/train/BUILDING_00986
9438 INQUIRY/train/INQUIRY_00263
9438 POLICE/train/POLICE_00535
9438 EVENING/train/EVENING_00316
9438 PRESSURE/train/PRESSURE_00075
9438 LIVES/train/LIVES_00624
9438 PLANS/val/PLANS_00018
9438 CAPITAL/train/CAPITAL_00276
9438 WHILE/train/WHILE_00176
9438 ASKING/train/ASKING_00641
9438 ACCUSED/train/ACCUSED_00195
9438 HOURS/train/HOURS_00123
9438 INDUSTRY/train/INDUSTRY_00827
9438 WELFARE/train/WELFARE_00604
9438 LEVEL/test/LEVEL_00012
9438 UNDER/train/UNDER_00217
9438 BROUGHT/train/BROUGHT_00029
9438 COUPLE/train/COUPLE_00552
9438 MINISTERS/train/MINISTERS_00723
9438 COULD/train/COULD_00806
9438 ENGLAND/train/ENGLAND_00374
9438 MINUTES/train/MINUTES_00706
9438 COUNTRIES/train/COUNTRIES_00731
9438 THREE/train/THREE_00457
9438 WEEKS/train/WEEKS_00363
9438 LEAST/train/LEAST_00279
9438 SPEND/train/SPEND_00683
9438 HOURS/train/HOURS_00805
9438 ACCUSED/train/ACCUSED_00242
9438 GEORGE/train/GEORGE_00245
9438 MILLION/train/MILLION_00441
9438 ECONOMIC/train/ECONOMIC_00436
9438 PRICE/train/PRICE_00358
9438 COMPANY/train/COMPANY_00156
9438 AMONG/train/AMONG_00845
9438 ABUSE/train/ABUSE_00012
9438 SECOND/train/SECOND_00251
9438 MANCHESTER/train/MANCHESTER_00632
9438 IMMIGRATION/train/IMMIGRATION_00568
9438 WEATHER/train/WEATHER_00487
9438 VIOLENCE/test/VIOLENCE_00029
9438 ALMOST/train/ALMOST_00356
9438 RETURN/train/RETURN_00695
9438 TRIAL/train/TRIAL_00076
9438 FORCES/train/FORCES_00252
9438 INQUIRY/train/INQUIRY_00531
9438 ASKING/train/ASKING_00518
9438 WRONG/train/WRONG_00207
9438 OFFICERS/train/OFFICERS_00133
9438 STORY/train/STORY_00070
9438 JAMES/train/JAMES_00570
9438 CONFLICT/train/CONFLICT_00625
9438 ACTION/train/ACTION_00791
9438 AGAINST/train/AGAINST_00723
9438 JAMES/train/JAMES_00343
9438 AHEAD/train/AHEAD_00641
9438 SENIOR/train/SENIOR_00799
9438 DESCRIBED/train/DESCRIBED_00286
9438 WATER/train/WATER_00540
9438 CHANGE/train/CHANGE_00219
9438 ANNOUNCED/train/ANNOUNCED_00014
9438 PRICE/train/PRICE_00451
9438 HEARD/train/HEARD_00164
9438 SINCE/train/SINCE_00676
9438 KNOWN/train/KNOWN_00652
9438 ALREADY/train/ALREADY_00802
9438 FAMILIES/train/FAMILIES_00730
9438 CRIME/train/CRIME_00250
9438 TOMORROW/train/TOMORROW_00924
9438 ENERGY/train/ENERGY_00183
9438 NEEDS/train/NEEDS_00635
9438 HUNDREDS/train/HUNDREDS_00329
9438 LEADER/train/LEADER_00732
9438 BUDGET/train/BUDGET_00505
9438 OPPOSITION/train/OPPOSITION_00520
9438 EXPECT/train/EXPECT_00313
9438 HOSPITAL/train/HOSPITAL_00967
9438 CHARGE/train/CHARGE_00519
9438 WITHOUT/test/WITHOUT_00038
9438 AMERICA/train/AMERICA_00219
9438 PARENTS/train/PARENTS_00326
9438 MISSING/train/MISSING_00312
9438 CHARGES/train/CHARGES_00164
9438 TRIAL/train/TRIAL_00446
9438 DURING/train/DURING_00600
9438 INCREASE/train/INCREASE_00181
9438 BEING/train/BEING_00453
9438 INQUIRY/train/INQUIRY_00236
9438 TAKING/train/TAKING_00266
9438 TRUST/train/TRUST_00076
9438 MILLION/train/MILLION_00786
9438 LONDON/train/LONDON_00609
9438 DEATH/train/DEATH_00314
9438 NEEDS/train/NEEDS_00664
9438 STARTED/train/STARTED_00528
9438 ALLOW/train/ALLOW_00282
9438 HEALTH/train/HEALTH_00858
9438 WELCOME/test/WELCOME_00050
9438 WORKERS/train/WORKERS_00187
9438 WEEKEND/train/WEEKEND_00388
9438 PARTS/train/PARTS_00562
9438 DAVID/train/DAVID_00190
9438 PUBLIC/train/PUBLIC_00378
9438 CHIEF/train/CHIEF_00841
9438 MILLIONS/train/MILLIONS_00177
9438 FORCES/train/FORCES_00123
9438 PRISON/train/PRISON_00298
9438 ENGLAND/train/ENGLAND_00321
9438 POTENTIAL/train/POTENTIAL_00293
9438 SPECIAL/train/SPECIAL_00022
9438 MEDIA/train/MEDIA_00461
9438 REPORT/train/REPORT_00450
9438 INQUIRY/train/INQUIRY_00873
9438 FAMILY/test/FAMILY_00036
9438 ACCUSED/train/ACCUSED_00867
9438 INDEPENDENT/train/INDEPENDENT_00274
9438 UNITED/train/UNITED_00376
9438 LOCAL/train/LOCAL_00796
9438 FIGHT/train/FIGHT_00958
9438 INQUIRY/train/INQUIRY_00545
9438 COURT/train/COURT_00194
9438 SCHOOLS/train/SCHOOLS_00809
9438 CAMERON/train/CAMERON_00639
9438 WHICH/train/WHICH_00414
9438 COUNTRY/train/COUNTRY_00328
9438 UNION/train/UNION_00049
9438 LEADER/train/LEADER_00115
9438 NUMBERS/train/NUMBERS_00958
9438 POLICE/test/POLICE_00011
9438 MAJORITY/train/MAJORITY_00223
9438 NEVER/train/NEVER_00466
9438 ANNOUNCED/train/ANNOUNCED_00798
9438 LABOUR/train/LABOUR_00830
9438 SPEAKING/train/SPEAKING_00858
9438 CHIEF/train/CHIEF_00214
9438 EMERGENCY/train/EMERGENCY_00197
9438 SERIES/train/SERIES_00048
9438 SYRIAN/train/SYRIAN_00676
9438 USING/train/USING_00487
9438 ENOUGH/train/ENOUGH_00405
9438 FOREIGN/train/FOREIGN_00901
9438 MEDICAL/train/MEDICAL_00646
9438 COUNTRY/train/COUNTRY_00351
9438 TONIGHT/train/TONIGHT_00143
9438 ACCESS/train/ACCESS_00438
9438 PLANS/train/PLANS_00901
9438 WORKERS/train/WORKERS_00314
9438 DETAILS/train/DETAILS_00963
9438 LEADER/train/LEADER_00821
9438 ACCUSED/train/ACCUSED_00461
9438 LATEST/train/LATEST_00789
9438 POLICE/train/POLICE_00244
9438 STAFF/train/STAFF_00441
9438 TONIGHT/train/TONIGHT_00843
9438 VIOLENCE/train/VIOLENCE_00372
9438 ALLOWED/train/ALLOWED_00664
9438 EDITOR/train/EDITOR_00295
9438 MANCHESTER/train/MANCHESTER_00102
9438 PRESS/train/PRESS_00943
9438 EVENING/train/EVENING_00505
9438 INVESTMENT/train/INVESTMENT_00747
9438 COMMUNITY/train/COMMUNITY_00381
9438 TONIGHT/train/TONIGHT_00322
9438 RECORD/train/RECORD_00225
9438 FOOTBALL/train/FOOTBALL_00343
9438 PUBLIC/train/PUBLIC_00289
9438 CHANGES/train/CHANGES_00023
9438 THREAT/train/THREAT_00170
9438 CALLED/train/CALLED_00256
9438 LEADER/train/LEADER_00978
9438 LARGE/train/LARGE_00215
9438 THOUGHT/train/THOUGHT_00666
9438 ATTACK/train/ATTACK_00105
9438 AFFAIRS/train/AFFAIRS_00779
9438 POWER/train/POWER_00710
9438 ASKING/train/ASKING_00278
9438 AFFAIRS/train/AFFAIRS_00210
9438 SEVEN/train/SEVEN_00589
9438 WATCHING/train/WATCHING_00472
9438 CUSTOMERS/train/CUSTOMERS_00049
9438 REPORTS/train/REPORTS_00911
9438 MINUTES/train/MINUTES_00693
9438 HEARD/train/HEARD_00486
9438 OFFICIALS/train/OFFICIALS_00678
9438 WORST/train/WORST_00488
9438 GROWING/train/GROWING_00207
9438 OPERATION/test/OPERATION_00014
9438 JAMES/train/JAMES_00239
9438 INDUSTRY/train/INDUSTRY_00826
9438 WEEKEND/train/WEEKEND_00670
9438 PUBLIC/train/PUBLIC_00278
9438 SERVICE/train/SERVICE_00470
9438 HAPPENED/test/HAPPENED_00010
9438 FORCE/train/FORCE_00399
9438 BEFORE/train/BEFORE_00521
9438 KILLED/train/KILLED_00837
9438 CHARGES/train/CHARGES_00980
9438 DEATH/train/DEATH_00972
9438 FORCE/train/FORCE_00303
9438 MONTHS/train/MONTHS_00466
9438 SCOTLAND/train/SCOTLAND_00986
9438 THOUGHT/train/THOUGHT_00417
9438 REMEMBER/train/REMEMBER_00335
9438 FUTURE/train/FUTURE_00519
9438 EVENING/train/EVENING_00775
9438 CRISIS/train/CRISIS_00820
9438 SECURITY/train/SECURITY_00021
9438 CAMERON/train/CAMERON_00458
9438 ARRESTED/train/ARRESTED_00962
9438 AMONG/train/AMONG_00245
9438 BEFORE/train/BEFORE_00624
9438 SMALL/train/SMALL_00797
9438 FOUND/train/FOUND_00596
9438 MISSING/train/MISSING_00270
9438 OUTSIDE/train/OUTSIDE_00850
9438 THOUSANDS/train/THOUSANDS_00508
9438 TRIAL/train/TRIAL_00432
9438 THOUSANDS/train/THOUSANDS_00142
9438 SERVICES/train/SERVICES_00041
9438 MESSAGE/train/MESSAGE_00596
9438 CONTROL/train/CONTROL_00566
9438 WITHOUT/train/WITHOUT_00295
9438 AFFECTED/train/AFFECTED_00225
9438 AGAINST/train/AGAINST_00014
9438 WALES/train/WALES_00867
9438 LOCAL/train/LOCAL_00184
9438 PERSON/train/PERSON_00332
9438 CAMERON/train/CAMERON_00749
9438 POWER/train/POWER_00926
9438 CHINA/train/CHINA_00897
9438 SOCIAL/test/SOCIAL_00003
9438 MONTH/train/MONTH_00715
9438 SOUTH/train/SOUTH_00128
9438 HOSPITAL/test/HOSPITAL_00023
9438 KILLED/train/KILLED_00444
9438 CHALLENGE/train/CHALLENGE_00689
9438 PARTS/train/PARTS_00484
9438 WORST/train/WORST_00827
9438 NEEDS/train/NEEDS_00439
9438 CLOSE/train/CLOSE_00026
9438 WATER/train/WATER_00807
9438 WORLD/train/WORLD_00075
9438 SOUTH/test/SOUTH_00015
9438 JAMES/train/JAMES_00319
9438 SEVERAL/train/SEVERAL_00692
9438 WELCOME/train/WELCOME_00037
9438 UNDER/train/UNDER_00088
9438 LABOUR/train/LABOUR_00917
9438 FIGURES/train/FIGURES_00449
9438 AFTER/train/AFTER_00631
9438 HOUSE/train/HOUSE_00117
9438 ITSELF/val/ITSELF_00037
9438 TRIAL/train/TRIAL_00695
9438 BUSINESSES/train/BUSINESSES_00471
9438 CLAIMS/train/CLAIMS_00755
9438 ACCUSED/train/ACCUSED_00119
9438 EMERGENCY/train/EMERGENCY_00172
9438 ENGLAND/train/ENGLAND_00917
9438 YESTERDAY/train/YESTERDAY_00299
9438 COUNTRY/train/COUNTRY_00738
9438 BEHIND/train/BEHIND_00031
9438 INVESTMENT/train/INVESTMENT_00100
9438 LOOKING/train/LOOKING_00398
9438 ACCUSED/train/ACCUSED_00375
9438 ACTION/train/ACTION_00934
9438 ACCUSED/train/ACCUSED_00440
9438 RIGHTS/train/RIGHTS_00489
9438 NUMBER/train/NUMBER_00496
9438 AFTER/train/AFTER_00877
9438 INQUIRY/train/INQUIRY_00745
9438 PATIENTS/train/PATIENTS_00152
9438 FOOTBALL/train/FOOTBALL_00888
9438 IMPACT/train/IMPACT_00162
9438 CANCER/train/CANCER_00771
9438 KNOWN/train/KNOWN_00542
9438 DAVID/train/DAVID_00037
9438 ABUSE/train/ABUSE_00964
9438 WHILE/train/WHILE_00836
9438 PLANS/train/PLANS_00337
9438 ECONOMY/train/ECONOMY_00679
9438 STARTED/train/STARTED_00149
9438 PUBLIC/train/PUBLIC_00574
9438 GIVING/test/GIVING_00010
9438 OBAMA/train/OBAMA_00412
9438 INDUSTRY/train/INDUSTRY_00881
9438 INQUIRY/train/INQUIRY_00309
9438 QUESTION/train/QUESTION_00089
9438 SHORT/train/SHORT_00967
9438 EARLY/train/EARLY_00333
9438 EXTRA/train/EXTRA_00020
9438 VIOLENCE/train/VIOLENCE_00228
9438 PROCESS/train/PROCESS_00442
9438 WHICH/train/WHICH_00263
9438 DEATH/train/DEATH_00870
9438 FOCUS/train/FOCUS_00325
9438 DEATH/train/DEATH_00028
9438 MAKING/test/MAKING_00040
9438 GUILTY/train/GUILTY_00186
9438 GROUP/train/GROUP_00850
9438 PRIME/train/PRIME_00568
9438 EXPECTED/train/EXPECTED_00991
9438 MEASURES/train/MEASURES_00896
9438 FIGHTING/train/FIGHTING_00745
9438 LEAVE/train/LEAVE_00690
9438 KILLED/train/KILLED_00468
9438 EVENING/test/EVENING_00045
9438 FIGHTING/train/FIGHTING_00502
9438 LEADER/train/LEADER_00093
9438 JAMES/train/JAMES_00466
9438 CANCER/train/CANCER_00826
9438 AMERICAN/train/AMERICAN_00919
9438 THOUSANDS/train/THOUSANDS_00568
9438 STREET/train/STREET_00339
9438 HOMES/train/HOMES_00059
9438 SOCIAL/train/SOCIAL_00995
9438 EXAMPLE/test/EXAMPLE_00002
9438 HEALTH/train/HEALTH_00575
9438 CHANGE/train/CHANGE_00883
9438 CLEAR/train/CLEAR_00434
9438 DETAILS/train/DETAILS_00421
9438 AHEAD/train/AHEAD_00593
9438 CHILDREN/train/CHILDREN_00914
9438 COUPLE/train/COUPLE_00403
9438 SOUTH/train/SOUTH_00505
9438 ASKING/train/ASKING_00732
9438 HOUSE/train/HOUSE_00415
9438 ANSWER/train/ANSWER_00149
9438 GLOBAL/train/GLOBAL_00474
9438 LABOUR/train/LABOUR_00089
9438 POWERS/train/POWERS_00897
9438 STAFF/train/STAFF_00636
9438 ABUSE/train/ABUSE_00989
9438 BLACK/train/BLACK_00223
9438 MINISTERS/train/MINISTERS_00904
9438 BEING/train/BEING_00426
9438 HOUSING/train/HOUSING_00624
9438 CLOSE/train/CLOSE_00443
9438 ACCUSED/train/ACCUSED_00725
9438 BROUGHT/train/BROUGHT_00625
9438 FORMER/train/FORMER_00625
9438 TOMORROW/test/TOMORROW_00042
9438 BILLION/train/BILLION_00997
9438 OFFICIALS/train/OFFICIALS_00562
9438 GUILTY/train/GUILTY_00073
9438 MAKING/train/MAKING_00706
9438 DESPITE/train/DESPITE_00312
9438 AFTER/train/AFTER_00147
9438 FINANCIAL/train/FINANCIAL_00993
9438 CONTINUE/train/CONTINUE_00081
9438 INVESTMENT/test/INVESTMENT_00016
9438 REPORTS/train/REPORTS_00049
9438 PERSONAL/train/PERSONAL_00322
9438 WESTMINSTER/train/WESTMINSTER_00254
9438 STAND/train/STAND_00868
9438 MURDER/train/MURDER_00045
9438 FUTURE/train/FUTURE_00027
9438 COURSE/train/COURSE_00072
9438 HUNDREDS/train/HUNDREDS_00333
9438 HEALTH/val/HEALTH_00005
9438 ALLEGATIONS/train/ALLEGATIONS_00898
9438 LABOUR/train/LABOUR_00776
9438 AFTER/train/AFTER_00157
9438 MAKING/train/MAKING_00077
9438 EMERGENCY/train/EMERGENCY_00184
9438 EUROPEAN/train/EUROPEAN_00376
9438 FORMER/train/FORMER_00161
9438 AFFAIRS/train/AFFAIRS_00132
9438 INDUSTRY/train/INDUSTRY_00047
9438 NIGHT/train/NIGHT_00150
9438 INFLATION/train/INFLATION_00001
9438 INVOLVED/train/INVOLVED_00117
9438 WHICH/train/WHICH_00929
9438 MILITARY/train/MILITARY_00001
9438 PRIME/train/PRIME_00836
9438 LEVEL/train/LEVEL_00406
9438 WEEKEND/train/WEEKEND_00435
9438 PRIME/train/PRIME_00453
9438 MONTHS/train/MONTHS_00565
9438 PHONE/train/PHONE_00828
9438 ACCUSED/train/ACCUSED_00155
9438 EVIDENCE/train/EVIDENCE_00708
9438 ORDER/train/ORDER_00601
9438 MANCHESTER/train/MANCHESTER_00167
9438 OFFICIALS/train/OFFICIALS_00064
9438 CHALLENGE/train/CHALLENGE_00088
9438 JAMES/train/JAMES_00156
9438 DESCRIBED/train/DESCRIBED_00199
9438 OFTEN/test/OFTEN_00036
9438 MINISTERS/train/MINISTERS_00745
9438 MANCHESTER/train/MANCHESTER_00075
9438 RUNNING/train/RUNNING_00282
9438 PLACES/train/PLACES_00851
9438 AFTER/train/AFTER_00245
9438 ALLOW/train/ALLOW_00175
9438 PRESS/train/PRESS_00565
9438 DEATH/train/DEATH_00962
9438 FIGHTING/train/FIGHTING_00950
9438 COULD/train/COULD_00420
9438 NEEDS/train/NEEDS_00363
9438 THEIR/train/THEIR_00983
9438 WEAPONS/train/WEAPONS_00918
9438 HEART/train/HEART_00619
9438 RUSSIAN/train/RUSSIAN_00447
9438 ALLEGATIONS/train/ALLEGATIONS_00067
9438 FOUND/train/FOUND_00546
9438 PEOPLE/train/PEOPLE_00601
9438 UNTIL/train/UNTIL_00025
9438 FIGHT/val/FIGHT_00046
9438 EDITOR/train/EDITOR_00029
9438 CLOUD/train/CLOUD_00875
9438 CHIEF/train/CHIEF_00839
9438 OFFICERS/train/OFFICERS_00236
9438 CRISIS/train/CRISIS_00253
9438 ASKING/train/ASKING_00908
9438 WELFARE/train/WELFARE_00114
9438 CAPITAL/train/CAPITAL_00139
9438 WARNING/train/WARNING_00774
9438 CHARGES/train/CHARGES_00886
9438 MILLION/train/MILLION_00904
9438 WEATHER/train/WEATHER_00863
9438 MURDER/train/MURDER_00789
9438 TEMPERATURES/train/TEMPERATURES_00596
9438 MEETING/train/MEETING_00587
9438 GEORGE/train/GEORGE_00997
9438 CAPITAL/train/CAPITAL_00519
9438 INFLATION/train/INFLATION_00620
9438 SERIES/train/SERIES_00097
9438 COUNTRIES/train/COUNTRIES_00531
9438 BRING/train/BRING_00800
9438 BILLION/train/BILLION_00572
9438 CHIEF/train/CHIEF_00827
9438 FINANCIAL/train/FINANCIAL_00203
9438 RUSSIAN/train/RUSSIAN_00116
9438 VIOLENCE/train/VIOLENCE_00149
9438 WORKERS/train/WORKERS_00710
9438 BETTER/train/BETTER_00060
9438 BUILD/train/BUILD_00203
9438 EUROPEAN/train/EUROPEAN_00881
9438 STREET/train/STREET_00834
9438 LATEST/train/LATEST_00084
9438 FAMILY/test/FAMILY_00029
9438 MAJORITY/train/MAJORITY_00582
9438 SOUTHERN/train/SOUTHERN_00574
9438 CURRENT/train/CURRENT_00830
9438 SCHOOL/train/SCHOOL_00088
9438 GEORGE/train/GEORGE_00279
9438 HOUSE/train/HOUSE_00166
9438 NORTHERN/train/NORTHERN_00924
9438 LOCAL/val/LOCAL_00008
9438 STORY/train/STORY_00458
9438 RETURN/train/RETURN_00770
9438 INVESTMENT/train/INVESTMENT_00603
9438 OPPOSITION/train/OPPOSITION_00082
9438 BETWEEN/train/BETWEEN_00165
9438 AGREEMENT/train/AGREEMENT_00010
9438 FINAL/train/FINAL_00615
9438 CHIEF/train/CHIEF_00304
9438 EMERGENCY/train/EMERGENCY_00164
9438 WARNING/train/WARNING_00220
9438 BRITAIN/test/BRITAIN_00039
9438 FINAL/train/FINAL_00460
9438 LATEST/train/LATEST_00486
9438 QUESTION/train/QUESTION_00621
9438 WALES/train/WALES_00535
9438 MEETING/train/MEETING_00874
9438 ANOTHER/train/ANOTHER_00365
9438 EXPECTED/train/EXPECTED_00854
9438 ARRESTED/train/ARRESTED_00525
9438 GEORGE/train/GEORGE_00711
9438 LEADER/train/LEADER_00306
9438 HIGHER/train/HIGHER_00307
9438 LONDON/train/LONDON_00966
9438 DEATH/train/DEATH_00279
9438 RESULT/train/RESULT_00110
9438 UNDER/val/UNDER_00023
9438 LEAST/train/LEAST_00654
9438 ANNOUNCED/train/ANNOUNCED_00344
9438 SOUTH/train/SOUTH_00620
9438 CALLED/train/CALLED_00757
9438 MURDER/train/MURDER_00437
9438 STAGE/train/STAGE_00438
9438 AFRICA/train/AFRICA_00732
9438 BILLION/train/BILLION_00274
9438 HUNDREDS/train/HUNDREDS_00352
9438 WHOLE/train/WHOLE_00211
9438 HUNDREDS/train/HUNDREDS_00908
9438 MILLIONS/train/MILLIONS_00799
9438 MINISTERS/train/MINISTERS_00612
9438 MEDIA/train/MEDIA_00524
9438 STORY/train/STORY_00105
9438 PEOPLE/train/PEOPLE_00219
9438 SIDES/train/SIDES_00180
9438 PHONE/train/PHONE_00277
9438 ALMOST/train/ALMOST_00031
9438 MAKING/train/MAKING_00213
9438 LIVING/train/LIVING_00142
9438 MIGHT/train/MIGHT_00233
9438 CAMPAIGN/train/CAMPAIGN_00914
9438 REPORTS/train/REPORTS_00316
9438 FACING/train/FACING_00775
9438 FAMILIES/train/FAMILIES_00577
9438 OPPOSITION/train/OPPOSITION_00405
9438 TOMORROW/train/TOMORROW_00148
9438 RECORD/train/RECORD_00981
9438 DURING/train/DURING_00927
9438 PUBLIC/train/PUBLIC_00427
9438 LEGAL/train/LEGAL_00292
9438 THEIR/test/THEIR_00033
9438 GAMES/train/GAMES_00843
9438 PHONE/train/PHONE_00836
9438 SPEECH/train/SPEECH_00943
9438 SECRETARY/train/SECRETARY_00460
9438 FORCES/train/FORCES_00450
9438 TEMPERATURES/train/TEMPERATURES_00604
9438 HOURS/train/HOURS_00643
9438 TOMORROW/train/TOMORROW_00042
9438 RECORD/train/RECORD_00589
9438 PARENTS/train/PARENTS_00790
9438 SENIOR/train/SENIOR_00561
9438 NUMBER/train/NUMBER_00053
9438 MINISTERS/train/MINISTERS_00956
9438 JAMES/train/JAMES_00685
9438 SENIOR/train/SENIOR_00038
9438 LEVELS/train/LEVELS_00098
9438 SENIOR/train/SENIOR_00997
9438 VIOLENCE/train/VIOLENCE_00095
9438 INFLATION/train/INFLATION_00121
9438 POLITICAL/train/POLITICAL_00757
9438 KNOWN/train/KNOWN_00928
9438 STAGE/test/STAGE_00046
9438 YESTERDAY/train/YESTERDAY_00122
9438 CALLED/train/CALLED_00567
9438 POLICE/train/POLICE_00532
9438 MONTHS/train/MONTHS_00065
9438 UNDER/train/UNDER_00133
9438 EMERGENCY/train/EMERGENCY_00200
9438 WORST/train/WORST_00830
9438 OFFICERS/train/OFFICERS_00911
9438 ATTACK/train/ATTACK_00263
9438 RULES/test/RULES_00007
9438 CHILDREN/train/CHILDREN_00761
9438 HEART/train/HEART_00725
9438 WANTS/train/WANTS_00931
9438 OTHERS/train/OTHERS_00318
9438 BEING/train/BEING_00005
9438 GROWING/train/GROWING_00092
9438 SECRETARY/train/SECRETARY_00835
9438 SERIES/train/SERIES_00753
9438 SECOND/train/SECOND_00617
9438 YEARS/train/YEARS_00970
9438 SEVEN/train/SEVEN_00111
9438 LONDON/train/LONDON_00896
9438 QUITE/train/QUITE_00561
9438 LOOKING/train/LOOKING_00600
9438 ECONOMY/train/ECONOMY_00827
9438 WHERE/train/WHERE_00606
9438 HOUSE/train/HOUSE_00325
9438 MANCHESTER/train/MANCHESTER_00475
9438 REPORT/train/REPORT_00491
9438 SOUTH/val/SOUTH_00022
9438 MANCHESTER/train/MANCHESTER_00028
9438 AGAINST/train/AGAINST_00431
9438 FORCES/train/FORCES_00992
9438 ABUSE/train/ABUSE_00830
9438 OFFICIALS/train/OFFICIALS_00361
9438 TOMORROW/train/TOMORROW_00009
9438 MILLION/train/MILLION_00128
9438 TODAY/train/TODAY_00237
9438 BROUGHT/train/BROUGHT_00582
9438 STATEMENT/train/STATEMENT_00439
9438 MAJOR/train/MAJOR_00411
9438 PRISON/test/PRISON_00046
9438 LEADER/train/LEADER_00319
9438 ALMOST/train/ALMOST_00388
9438 FORCES/train/FORCES_00268
9438 HOUSING/train/HOUSING_00437
9438 FOUND/train/FOUND_00345
9438 UNION/train/UNION_00508
9438 EUROPEAN/train/EUROPEAN_00446
9438 YOUNG/train/YOUNG_00708
9438 REMEMBER/test/REMEMBER_00013
9438 CHANGES/train/CHANGES_00939
9438 WHICH/train/WHICH_00428
9438 SEVERAL/train/SEVERAL_00192
9438 REPORTS/train/REPORTS_00841
9438 MOVING/train/MOVING_00489
9438 BEFORE/train/BEFORE_00036
9438 GEORGE/train/GEORGE_00410
9438 MINISTERS/train/MINISTERS_00064
9438 GIVEN/train/GIVEN_00037
9438 BANKS/test/BANKS_00040
9438 CONTINUE/train/CONTINUE_00677
9438 COULD/train/COULD_00402
9438 HUNDREDS/train/HUNDREDS_00967
9438 WHILE/train/WHILE_00571
9438 ACCUSED/train/ACCUSED_00270
9438 SYRIAN/test/SYRIAN_00024
9438 CAPITAL/train/CAPITAL_00917
9438 HOMES/train/HOMES_00055
9438 FOLLOWING/train/FOLLOWING_00056
9438 WORST/train/WORST_00310
9438 GETTING/train/GETTING_00727
9438 REPORTS/train/REPORTS_00150
9438 DESCRIBED/train/DESCRIBED_00813
9438 ECONOMIC/train/ECONOMIC_00706
9438 COMES/train/COMES_00017
9438 ALWAYS/train/ALWAYS_00150
9438 HUNDREDS/train/HUNDREDS_00275
9438 BUSINESS/train/BUSINESS_00649
9438 COURSE/train/COURSE_00596
9438 WHICH/train/WHICH_00633
9438 GEORGE/train/GEORGE_00970
9438 CUSTOMERS/train/CUSTOMERS_00847
9438 INSIDE/train/INSIDE_00583
9438 HEARD/train/HEARD_00467
9438 REPORTS/train/REPORTS_00396
9438 PRESIDENT/train/PRESIDENT_00583
9438 WELCOME/train/WELCOME_00007
9438 MEDIA/train/MEDIA_00710
9438 ACCESS/train/ACCESS_00270
9438 POSITION/train/POSITION_01000
9438 BUSINESSES/train/BUSINESSES_00719
9438 UNITED/train/UNITED_00910
9438 INSIDE/train/INSIDE_00838
9438 CONFERENCE/train/CONFERENCE_00270
9438 WORKERS/train/WORKERS_00912
9438 SERVICE/train/SERVICE_00723
9438 SYRIAN/train/SYRIAN_00050
9438 THOUSANDS/train/THOUSANDS_00633
9438 CAMERON/train/CAMERON_00566
9438 HAPPENED/train/HAPPENED_00305
9438 RECORD/train/RECORD_00075
9438 WALES/train/WALES_00124
9438 POWER/train/POWER_00988
9438 THREE/train/THREE_00784
9438 KILLED/train/KILLED_00623
9438 HOSPITAL/train/HOSPITAL_00426
9438 EDUCATION/train/EDUCATION_00091
9438 YOUNG/train/YOUNG_00973
9438 CALLED/train/CALLED_00295
9438 FOOTBALL/test/FOOTBALL_00003
9438 LEGAL/train/LEGAL_00079
9438 INQUIRY/train/INQUIRY_00799
9438 DEATH/train/DEATH_00334
9438 WESTMINSTER/train/WESTMINSTER_00660
9438 SECURITY/train/SECURITY_00081
9438 GROWING/train/GROWING_00959
9438 PERSONAL/train/PERSONAL_00575
9438 CHALLENGE/train/CHALLENGE_00486
9438 MORNING/train/MORNING_00812
9438 EVENING/train/EVENING_00083
9438 WEAPONS/train/WEAPONS_00518
9438 SPECIAL/train/SPECIAL_00132
9438 CHANGE/train/CHANGE_00414
9438 SPECIAL/train/SPECIAL_00053
9438 MILITARY/train/MILITARY_00371
9438 ANOTHER/train/ANOTHER_00391
9438 LEADERSHIP/train/LEADERSHIP_00368
9438 MONEY/train/MONEY_00360
9438 AFFECTED/train/AFFECTED_00526
9438 GEORGE/train/GEORGE_00453
9438 EXTRA/train/EXTRA_00078
9438 STRONG/train/STRONG_00654
9438 WARNING/train/WARNING_00251
9438 AMERICAN/train/AMERICAN_00476
9438 ANOTHER/train/ANOTHER_00846
9438 EDITOR/train/EDITOR_00097
9438 PRESSURE/train/PRESSURE_00870
9438 RUSSIAN/train/RUSSIAN_00028
9438 LEVEL/train/LEVEL_00170
9438 PARLIAMENT/train/PARLIAMENT_00781
9438 IMMIGRATION/train/IMMIGRATION_00927
9438 PARLIAMENT/test/PARLIAMENT_00003
9438 GIVEN/train/GIVEN_00779
9438 HOMES/train/HOMES_00562
9438 LIVES/train/LIVES_00129
9438 CHARGES/train/CHARGES_00156
9438 MILLIONS/train/MILLIONS_00722
9438 AHEAD/train/AHEAD_00389
9438 GIVING/train/GIVING_00701
9438 REPORTS/train/REPORTS_00541
9438 ABUSE/train/ABUSE_00098
9438 COMPANY/train/COMPANY_00706
9438 SMALL/train/SMALL_00837
9438 THIRD/train/THIRD_00025
9438 PARTS/train/PARTS_00090
9438 MEETING/train/MEETING_00457
9438 TOGETHER/train/TOGETHER_00282
9438 CONFLICT/train/CONFLICT_00381
9438 FURTHER/train/FURTHER_00224
9438 HOMES/train/HOMES_00466
9438 HUMAN/train/HUMAN_00597
9438 DIFFERENT/train/DIFFERENT_00814
9438 SERIES/train/SERIES_00660
9438 AFFAIRS/train/AFFAIRS_00424
9438 DURING/test/DURING_00048
9438 WORST/train/WORST_00822
9438 SPEECH/train/SPEECH_00763
9438 TRIAL/train/TRIAL_00194
9438 MEETING/train/MEETING_00726
9438 BETWEEN/train/BETWEEN_00065
9438 EVERY/train/EVERY_00629
9438 ACCORDING/train/ACCORDING_00312
9438 SERIOUS/train/SERIOUS_00711
9438 SERVICES/train/SERVICES_00357
9438 MILLIONS/train/MILLIONS_00543
9438 CRIME/train/CRIME_00045
9438 ENOUGH/train/ENOUGH_00921
9438 LONDON/train/LONDON_00129
9438 BENEFITS/train/BENEFITS_00342
9438 MEDICAL/train/MEDICAL_00267
9438 AMERICAN/train/AMERICAN_00299
9438 NUMBERS/train/NUMBERS_00128
9438 HEARD/train/HEARD_00765
9438 LATEST/train/LATEST_00864
9438 SECOND/train/SECOND_00568
9438 CALLED/train/CALLED_00929
9438 PRIVATE/train/PRIVATE_00412
9438 SPECIAL/train/SPECIAL_00869
9438 POTENTIAL/train/POTENTIAL_00764
9438 REPORT/train/REPORT_00437
9438 DECISION/train/DECISION_00583
9438 GEORGE/train/GEORGE_00117
9438 MAJOR/train/MAJOR_00370
9438 MILLIONS/train/MILLIONS_00966
9438 WARNING/train/WARNING_00720
9438 COURT/train/COURT_00458
9438 WITHOUT/train/WITHOUT_00689
9438 SEVERAL/train/SEVERAL_00270
9438 ASKED/train/ASKED_00104
9438 FOUND/train/FOUND_00913
9438 WEATHER/train/WEATHER_00747
9438 REPORTS/train/REPORTS_00310
9438 ACTION/train/ACTION_00569
9438 TAKEN/train/TAKEN_00461
9438 AMOUNT/train/AMOUNT_00451
9438 LEGAL/train/LEGAL_00847
9438 LIVING/train/LIVING_00624
9438 CONCERNS/train/CONCERNS_00365
9438 SECOND/train/SECOND_00556
9438 PRIVATE/train/PRIVATE_00106
9438 SECRETARY/train/SECRETARY_00719
9438 AMERICA/train/AMERICA_00847
9438 CONFERENCE/train/CONFERENCE_00192
9438 SCOTLAND/train/SCOTLAND_00550
9438 FAMILIES/train/FAMILIES_00880
9438 PHONE/test/PHONE_00013
9438 PHONE/train/PHONE_00595
9438 BRITISH/train/BRITISH_00111
9438 TRIAL/train/TRIAL_00531
9438 FIGHTING/val/FIGHTING_00040
9438 SECOND/train/SECOND_00859
9438 WEAPONS/train/WEAPONS_00677
9438 LONDON/train/LONDON_00766
9438 SPECIAL/train/SPECIAL_00238
9438 HISTORY/train/HISTORY_00084
9438 OBAMA/train/OBAMA_00509
9438 SERIES/train/SERIES_00220
9438 HAPPENING/train/HAPPENING_00076
9438 WELCOME/train/WELCOME_00646
9438 WAITING/train/WAITING_00126
9438 GEORGE/train/GEORGE_00218
9438 HEAVY/train/HEAVY_00426
9438 SPENT/train/SPENT_00420
9438 BENEFITS/train/BENEFITS_00643
9438 EDITOR/train/EDITOR_00478
9438 CHALLENGE/train/CHALLENGE_00728
9438 WOMEN/train/WOMEN_00565
9438 BIGGEST/train/BIGGEST_00111
9438 CRIME/train/CRIME_00028
9438 DESPITE/train/DESPITE_00893
9438 SCHOOL/train/SCHOOL_00830
9438 REMEMBER/train/REMEMBER_00160
9438 SOUTHERN/train/SOUTHERN_00087
9438 HOSPITAL/train/HOSPITAL_00126
9438 BRITAIN/train/BRITAIN_00774
9438 ELECTION/train/ELECTION_00957
9438 EDITOR/train/EDITOR_00916
9438 FRANCE/train/FRANCE_00925
9438 RESPONSE/test/RESPONSE_00036
9438 COMMUNITY/train/COMMUNITY_00508
9438 WELCOME/train/WELCOME_00455
9438 MEASURES/train/MEASURES_00140
9438 GEORGE/train/GEORGE_00067
9438 SECURITY/train/SECURITY_00604
9438 FORMER/train/FORMER_00904
9438 CONFERENCE/train/CONFERENCE_00573
9438 KNOWN/train/KNOWN_00430
9438 PRISON/test/PRISON_00034
9438 FIGHTING/train/FIGHTING_00923
9438 CAPITAL/train/CAPITAL_00204
9438 THIRD/train/THIRD_00218
9438 SCOTTISH/train/SCOTTISH_00648
9438 FRANCE/train/FRANCE_00310
9438 CHANGES/train/CHANGES_00251
9438 GAMES/train/GAMES_00699
9438 REPORTS/train/REPORTS_00236
9438 EDITOR/train/EDITOR_00516
9438 WORDS/train/WORDS_00413
9438 BUSINESS/train/BUSINESS_00284
9438 INDEPENDENT/train/INDEPENDENT_00122
9438 LABOUR/train/LABOUR_00087
9438 ENERGY/train/ENERGY_00399
9438 COMPANIES/train/COMPANIES_00570
9438 BRITISH/train/BRITISH_00621
9438 COMPANY/train/COMPANY_00252
9438 TONIGHT/train/TONIGHT_00594
9438 LEVEL/train/LEVEL_00916
9438 VICTIMS/train/VICTIMS_00399
9438 AROUND/train/AROUND_00327
9438 REPORT/train/REPORT_00227
9438 SUNDAY/train/SUNDAY_00969
9438 MEASURES/train/MEASURES_00551
9438 REPORTS/train/REPORTS_00891
9438 WELFARE/train/WELFARE_00840
9438 COMPANY/train/COMPANY_00608
9438 CHILDREN/train/CHILDREN_00571
9438 UNDER/train/UNDER_00556
9438 WELCOME/train/WELCOME_00209
9438 CHILD/train/CHILD_00634
9438 ANNOUNCED/train/ANNOUNCED_00359
9438 PRICES/train/PRICES_00701
9438 NORTHERN/train/NORTHERN_00459
9438 FOOTBALL/train/FOOTBALL_00688
9438 DEFICIT/train/DEFICIT_00323
9438 PRESSURE/train/PRESSURE_00856
9438 CHANGES/train/CHANGES_00884
9438 FINANCIAL/train/FINANCIAL_00395
9438 BEHIND/train/BEHIND_00394
9438 RUSSIA/train/RUSSIA_00203
9438 KILLED/train/KILLED_00887
9438 PEOPLE/train/PEOPLE_00532
9438 CENTRAL/train/CENTRAL_00227
9438 AMERICAN/train/AMERICAN_00575
9438 JUSTICE/test/JUSTICE_00015
9438 MISSING/train/MISSING_00845
9438 EDITOR/train/EDITOR_00732
9438 UNION/train/UNION_00714
9438 CHIEF/train/CHIEF_00399
9438 CRISIS/train/CRISIS_00806
9438 MANCHESTER/train/MANCHESTER_00974
9438 THOUSANDS/train/THOUSANDS_00229
9438 BRITISH/train/BRITISH_00286
9438 MURDER/train/MURDER_00425
9438 LEVELS/train/LEVELS_00289
9438 LONDON/train/LONDON_00316
9438 SECURITY/train/SECURITY_00201
9438 FAMILIES/train/FAMILIES_00691
9438 WORDS/train/WORDS_00485
9438 EVENING/train/EVENING_00465
9438 MONTH/train/MONTH_00819
9438 HEALTH/train/HEALTH_00687
9438 EUROPE/train/EUROPE_00133
9438 ABUSE/train/ABUSE_00826
9438 PERIOD/train/PERIOD_00378
9438 LONDON/train/LONDON_00640
9438 LATEST/train/LATEST_00655
9438 SOUTH/train/SOUTH_00784
9438 MINISTERS/train/MINISTERS_00244
9438 AFFAIRS/train/AFFAIRS_00052
9438 UNITED/train/UNITED_00963
9438 MINUTES/train/MINUTES_00999
9438 INCREASE/train/INCREASE_00811
9438 AFRICA/train/AFRICA_00377
9438 STAGE/train/STAGE_00319
9438 DEATH/train/DEATH_00744
9438 SHOULD/train/SHOULD_00578
9438 MILLIONS/train/MILLIONS_00476
9438 TOMORROW/train/TOMORROW_00318
9438 STAFF/train/STAFF_00984
9438 WATER/train/WATER_00539
9438 WHILE/train/WHILE_00186
9438 WARNING/train/WARNING_00924
9438 REFERENDUM/test/REFERENDUM_00025
9438 RUSSIAN/train/RUSSIAN_00511
9438 SEVERAL/train/SEVERAL_00892
9438 LEAST/train/LEAST_00903
9438 OTHERS/train/OTHERS_00392
9438 SOCIAL/train/SOCIAL_00469
9438 CHARGES/train/CHARGES_00653
9438 EDITOR/train/EDITOR_00855
9438 DOING/train/DOING_00241
9438 ENGLAND/train/ENGLAND_00268
9438 SCHOOL/train/SCHOOL_00587
9438 BEHIND/train/BEHIND_00870
9438 ABUSE/train/ABUSE_00968
9438 SITUATION/train/SITUATION_00489
9438 CONCERNS/train/CONCERNS_00617
9438 DESCRIBED/train/DESCRIBED_00399
9438 RETURN/train/RETURN_00361
9438 LEVELS/train/LEVELS_00182
9438 WEEKEND/train/WEEKEND_00995
9438 GIVING/train/GIVING_00362
9438 SCOTTISH/test/SCOTTISH_00050
9438 DOING/train/DOING_00820
9438 EXPECTED/train/EXPECTED_00346
9438 BIGGEST/train/BIGGEST_00286
9438 MEETING/train/MEETING_00408
9438 TIMES/train/TIMES_00471
9438 COMPANIES/train/COMPANIES_00726
9438 GOVERNMENT/train/GOVERNMENT_00822
9438 MANCHESTER/train/MANCHESTER_00229
9438 SCOTLAND/train/SCOTLAND_00337
9438 SERVICES/train/SERVICES_00933
9438 THOUGHT/train/THOUGHT_00680
9438 EDITOR/train/EDITOR_00896
9438 CHIEF/train/CHIEF_00871
9438 WATCHING/train/WATCHING_00269
9438 MINUTES/train/MINUTES_00369
9438 JAMES/train/JAMES_00480
9438 SCOTTISH/train/SCOTTISH_00121
9438 BUSINESSES/train/BUSINESSES_00144
9438 GAMES/train/GAMES_00494
9438 MILLION/train/MILLION_00883
9438 LIVES/train/LIVES_00714
9438 HEART/train/HEART_00005
9438 STAFF/train/STAFF_00909
9438 JAMES/train/JAMES_00616
9438 LATEST/train/LATEST_00368
9438 MINISTERS/train/MINISTERS_00075
9438 MIDDLE/train/MIDDLE_00835
9438 SINCE/train/SINCE_00766
9438 NUMBER/train/NUMBER_00818
9438 COURT/train/COURT_00026
9438 WORDS/train/WORDS_00506
9438 FORCE/train/FORCE_00625
9438 AFFAIRS/train/AFFAIRS_00908
9438 PARLIAMENT/train/PARLIAMENT_00686
9438 WOMEN/train/WOMEN_00558
9438 SERIES/train/SERIES_00094
9438 UNDER/train/UNDER_00330
9438 JAMES/train/JAMES_00686
9438 HUNDREDS/train/HUNDREDS_00381
9438 RATES/train/RATES_00901
9438 WELCOME/train/WELCOME_00100
9438 COMPANIES/train/COMPANIES_00875
9438 GLOBAL/train/GLOBAL_00206
9438 PRESSURE/train/PRESSURE_00116
9438 SCOTLAND/train/SCOTLAND_00439
9438 GIVEN/train/GIVEN_00838
9438 FORCE/train/FORCE_00406
9438 INDEPENDENT/train/INDEPENDENT_00861
9438 THOUGHT/train/THOUGHT_00159
9438 MESSAGE/train/MESSAGE_00684
9438 ECONOMY/train/ECONOMY_00168
9438 COUNCIL/test/COUNCIL_00047
9438 HOUSE/train/HOUSE_00382
9438 FORMER/train/FORMER_00641
9438 WELFARE/train/WELFARE_00058
9438 CAMERON/train/CAMERON_00461
9438 CALLED/train/CALLED_00583
9438 CRIME/train/CRIME_00467
9438 ABUSE/train/ABUSE_00240
9438 FOOTBALL/train/FOOTBALL_00896
9438 AFFECTED/train/AFFECTED_00719
9438 RATHER/train/RATHER_00974
9438 ABUSE/train/ABUSE_00759
9438 CONCERNS/train/CONCERNS_00137
9438 MORNING/train/MORNING_00221
9438 CHARGES/train/CHARGES_00259
9438 OFFICERS/train/OFFICERS_00079
9438 TONIGHT/train/TONIGHT_00553
9438 CHILDREN/train/CHILDREN_00035
9438 EVENING/train/EVENING_00756
9438 CALLED/train/CALLED_00163
9438 CALLED/train/CALLED_00348
9438 MINISTERS/train/MINISTERS_00903
9438 EVENING/train/EVENING_00863
9438 NOTHING/train/NOTHING_00439
9438 AFTER/train/AFTER_00408
9438 THIRD/train/THIRD_00414
9438 BUDGET/train/BUDGET_00935
9438 GERMANY/train/GERMANY_00414
9438 REPORTS/train/REPORTS_00881
9438 EDITOR/train/EDITOR_00853
9438 MONTH/train/MONTH_00244
9438 FOREIGN/train/FOREIGN_00741
9438 ASKING/train/ASKING_00548
9438 WHICH/train/WHICH_00886
9438 NATIONAL/train/NATIONAL_00283
9438 AFRICA/train/AFRICA_00758
9438 ECONOMY/train/ECONOMY_00404
9438 THOUSANDS/train/THOUSANDS_00106
9438 CONTROL/train/CONTROL_00955
9438 ANOTHER/train/ANOTHER_00146
9438 ALLEGATIONS/train/ALLEGATIONS_00291
9438 BEFORE/train/BEFORE_00581
9438 HEARD/train/HEARD_00681
9438 PRISON/train/PRISON_00423
9438 OUTSIDE/train/OUTSIDE_00939
9438 WATER/train/WATER_00668
9438 REPORTS/train/REPORTS_00607
9438 CHIEF/train/CHIEF_00332
9438 TOMORROW/train/TOMORROW_00730
9438 RECORD/train/RECORD_00709
9438 HOSPITAL/train/HOSPITAL_00179
9438 FORCES/train/FORCES_00421
9438 INFLATION/train/INFLATION_00023
9438 QUESTIONS/train/QUESTIONS_00694
9438 POLICE/train/POLICE_00399
9438 TALKING/train/TALKING_00296
9438 FORMER/train/FORMER_00339
9438 SECTOR/train/SECTOR_00972
9438 MINISTER/train/MINISTER_00911
9438 CHARGE/train/CHARGE_00603
9438 CHARGE/train/CHARGE_00188
9438 CHANGES/train/CHANGES_00575
9438 GIVING/train/GIVING_00292
9438 POLICE/train/POLICE_00924
9438 EDITOR/train/EDITOR_00112
9438 GAMES/train/GAMES_00535
9438 GENERAL/train/GENERAL_00996
9438 VICTIMS/train/VICTIMS_00972
9438 MURDER/train/MURDER_00024
9438 PHONE/train/PHONE_00435
9438 INQUIRY/train/INQUIRY_00480
9438 INSIDE/train/INSIDE_00579
9438 REPORT/train/REPORT_00995
9438 INTEREST/train/INTEREST_00759
9438 TONIGHT/train/TONIGHT_00816
9438 SECRETARY/train/SECRETARY_00788
9438 OFFICIALS/train/OFFICIALS_00777
9438 INFLATION/train/INFLATION_00572
9438 QUESTIONS/train/QUESTIONS_00006
9438 OFFICE/train/OFFICE_00834
9438 THREE/train/THREE_00660
9438 BUDGET/train/BUDGET_00222
9438 ALLEGATIONS/train/ALLEGATIONS_00731
9438 PRICE/train/PRICE_00919
9438 AFFECTED/train/AFFECTED_00069
9438 COURT/train/COURT_00934
9438 EVENING/train/EVENING_00651
9438 CRIME/train/CRIME_00569
9438 CRISIS/train/CRISIS_00289
9438 GIVING/train/GIVING_00243
9438 ASKING/train/ASKING_00743
9438 CLAIMS/train/CLAIMS_00715
9438 TOMORROW/train/TOMORROW_00395
9438 CLAIMS/train/CLAIMS_00287
9438 DEATH/train/DEATH_00341
9438 AUTHORITIES/train/AUTHORITIES_00149
9438 TRADE/train/TRADE_00315
9438 WOMEN/train/WOMEN_00321
9438 FURTHER/train/FURTHER_00290
9438 VIOLENCE/train/VIOLENCE_00304
9438 GROWTH/train/GROWTH_00824
9438 ALLOW/train/ALLOW_00495
9438 CAMERON/train/CAMERON_00893
9438 ANNOUNCED/train/ANNOUNCED_00292
9438 CALLED/train/CALLED_00380
9438 DURING/train/DURING_00473
9438 OFFICERS/test/OFFICERS_00021
9438 THOUSANDS/train/THOUSANDS_00998
9438 COULD/train/COULD_00751
9438 ALLOW/train/ALLOW_00746
9438 ATTACK/train/ATTACK_00626
9438 GOING/train/GOING_00103
9438 FOOTBALL/train/FOOTBALL_00932
9438 ASKING/train/ASKING_00935
9438 THIRD/train/THIRD_00001
9438 LIVING/train/LIVING_00699
9438 CUSTOMERS/train/CUSTOMERS_00103
9438 PLANS/train/PLANS_00026
9438 ALLEGATIONS/train/ALLEGATIONS_00054
9438 CHIEF/train/CHIEF_00787
9438 EXTRA/train/EXTRA_00887
9438 OPERATION/train/OPERATION_00736
9438 GIVING/train/GIVING_00276
9438 ATTACK/train/ATTACK_00045
9438 JAMES/train/JAMES_00049
9438 SEVEN/train/SEVEN_00356
9438 CAPITAL/train/CAPITAL_00571
9438 EDITOR/train/EDITOR_00974
9438 WESTMINSTER/train/WESTMINSTER_00663
9438 COURT/train/COURT_00937
9438 SCHOOLS/train/SCHOOLS_00243
9438 GLOBAL/train/GLOBAL_00480
9438 DETAILS/train/DETAILS_00399
9438 BUSINESS/train/BUSINESS_00696
9438 COURT/train/COURT_00310
9438 WAITING/test/WAITING_00050
9438 SERIES/train/SERIES_00702
9438 WANTS/train/WANTS_00171
9438 COUNCIL/train/COUNCIL_00252
9438 HEARD/train/HEARD_00875
9438 PERSON/train/PERSON_00308
9438 EVERY/train/EVERY_00039
9438 LARGE/train/LARGE_00334
9438 WINDS/train/WINDS_00810
9438 WEEKEND/train/WEEKEND_00848
9438 HISTORY/train/HISTORY_00013
9438 DETAILS/train/DETAILS_00232
9438 CANCER/train/CANCER_00249
9438 WESTMINSTER/train/WESTMINSTER_00403
9438 ABUSE/train/ABUSE_00073
9438 PRESIDENT/train/PRESIDENT_00721
9438 STORY/train/STORY_00237
9438 PERSONAL/train/PERSONAL_00609
9438 DURING/train/DURING_00565
9438 HOMES/train/HOMES_00307
9438 BUSINESS/train/BUSINESS_00592
9438 FORMER/train/FORMER_00716
9438 CONFLICT/train/CONFLICT_00556
9438 REPORT/train/REPORT_00818
9438 LARGE/train/LARGE_00834
9438 WORST/train/WORST_00793
9438 FINAL/train/FINAL_00068
9438 SECRETARY/train/SECRETARY_00563
9438 PRESSURE/train/PRESSURE_00523
9438 PHONE/train/PHONE_00529
9438 SINCE/test/SINCE_00012
9438 ANNOUNCED/train/ANNOUNCED_00812
9438 CONFERENCE/train/CONFERENCE_00664
9438 GEORGE/train/GEORGE_00273
9438 COMPANIES/train/COMPANIES_00441
9438 FINAL/train/FINAL_00322
9438 MEMBER/train/MEMBER_00382
9438 THIRD/train/THIRD_00403
9438 ASKING/train/ASKING_00051
9438 HEARD/train/HEARD_00711
9438 NEVER/train/NEVER_00691
9438 SECURITY/train/SECURITY_00521
9438 THIRD/train/THIRD_00376
9438 FIRST/train/FIRST_00830
9438 PRIME/train/PRIME_00452
9438 CHINA/train/CHINA_00157
9438 SUPPORT/val/SUPPORT_00018
9438 CLOSE/train/CLOSE_00469
9438 THOUSANDS/train/THOUSANDS_00453
9438 JAMES/train/JAMES_00729
9438 BILLION/train/BILLION_00635
9438 AFFAIRS/train/AFFAIRS_00282
9438 RIGHT/train/RIGHT_00836
9438 GROUP/train/GROUP_00807
9438 THOUGHT/train/THOUGHT_00351
9438 BENEFIT/train/BENEFIT_00444
9438 FIRST/train/FIRST_00111
9438 TALKS/train/TALKS_00978
9438 AFFAIRS/train/AFFAIRS_00261
9438 CHILDREN/train/CHILDREN_00521
9438 MURDER/train/MURDER_00934
9438 EXTRA/train/EXTRA_00838
9438 RIGHTS/train/RIGHTS_00022
9438 INFORMATION/train/INFORMATION_00348
9438 PLANS/train/PLANS_00584
9438 JAMES/train/JAMES_00166
9438 BIGGEST/train/BIGGEST_00851
9438 PROVIDE/train/PROVIDE_00014
9438 DEATH/train/DEATH_00708
9438 ISLAMIC/train/ISLAMIC_00357
9438 POLITICS/train/POLITICS_00096
9438 ALLEGATIONS/train/ALLEGATIONS_00376
9438 MEETING/train/MEETING_00808
9438 WEEKS/train/WEEKS_00334
9438 STORY/train/STORY_00320
9438 PLANS/train/PLANS_00565
9438 JAMES/train/JAMES_00671
9438 POTENTIAL/train/POTENTIAL_00657
9438 MISSING/train/MISSING_00034
9438 WITHOUT/train/WITHOUT_00106
9438 MAJOR/train/MAJOR_00133
9438 SERIES/train/SERIES_00788
9438 UNDER/train/UNDER_00401
9438 PERSONAL/train/PERSONAL_00050
9438 ALMOST/train/ALMOST_00550
9438 VICTIMS/train/VICTIMS_00937
9438 ENGLAND/train/ENGLAND_00808
9438 BIGGEST/train/BIGGEST_00133
9438 SPENDING/train/SPENDING_00512
9438 FOUND/train/FOUND_00504
9438 CASES/train/CASES_00548
9438 GLOBAL/train/GLOBAL_00134
9438 MURDER/train/MURDER_00101
9438 MONEY/train/MONEY_00858
9438 ENGLAND/train/ENGLAND_00511
9438 REPORTS/train/REPORTS_00258
9438 ACTUALLY/train/ACTUALLY_00182
9438 FIGURES/train/FIGURES_00735
9438 ASKED/train/ASKED_00146
9438 PATIENTS/train/PATIENTS_00355
9438 CLOSE/train/CLOSE_00515
9438 COMPANY/train/COMPANY_00154
9438 BUDGET/train/BUDGET_00777
9438 CLAIMS/train/CLAIMS_00693
9438 TOMORROW/train/TOMORROW_00936
9438 SINGLE/train/SINGLE_00060
9438 BUSINESS/train/BUSINESS_00029
9438 MIGRANTS/train/MIGRANTS_00092
9438 NATIONAL/train/NATIONAL_00511
9438 ABUSE/train/ABUSE_00043
9438 COUNCIL/train/COUNCIL_00145
9438 TONIGHT/train/TONIGHT_00222
9438 PATIENTS/train/PATIENTS_00017
9438 POLICY/train/POLICY_00148
9438 CUSTOMERS/train/CUSTOMERS_00133
9438 WRONG/train/WRONG_00128
9438 SINCE/test/SINCE_00050
9438 INFLATION/train/INFLATION_00409
9438 SECRETARY/train/SECRETARY_00677
9438 GROWING/train/GROWING_00651
9438 KNOWN/train/KNOWN_00599
9438 VIOLENCE/train/VIOLENCE_00711
9438 BIGGEST/train/BIGGEST_00663
9438 AFFAIRS/test/AFFAIRS_00035
9438 BORDER/train/BORDER_00188
9438 FAMILY/val/FAMILY_00045
9438 SPEND/train/SPEND_00660
9438 AMERICA/train/AMERICA_00193
9438 INDEPENDENT/val/INDEPENDENT_00009
9438 AFTER/train/AFTER_00651
9438 OUTSIDE/train/OUTSIDE_00601
9438 PRICES/train/PRICES_00071
9438 FRONT/train/FRONT_00572
9438 THROUGH/train/THROUGH_00755
9438 SPEAKING/train/SPEAKING_00790
9438 BORDER/train/BORDER_00923
9438 LONDON/train/LONDON_00332
9438 AGAINST/train/AGAINST_00343
9438 AFFECTED/train/AFFECTED_00056
9438 EVENTS/train/EVENTS_00119
9438 BILLION/train/BILLION_00106
9438 REPORT/train/REPORT_00882
9438 NATIONAL/train/NATIONAL_00818
9438 THOUSANDS/train/THOUSANDS_00842
9438 AFFAIRS/train/AFFAIRS_00007
9438 SINCE/train/SINCE_00361
9438 HISTORY/train/HISTORY_00271
9438 THESE/train/THESE_00412
9438 RUSSIAN/train/RUSSIAN_00330
9438 IMPACT/train/IMPACT_00946
9438 JAMES/train/JAMES_00131
9438 MIDDLE/train/MIDDLE_00618
9438 TRIAL/train/TRIAL_00844
9438 YEARS/train/YEARS_00121
9438 BANKS/train/BANKS_00671
9438 SECTOR/train/SECTOR_00874
9438 POLITICAL/train/POLITICAL_00421
9438 THEMSELVES/train/THEMSELVES_00025
9438 THREE/train/THREE_00021
9438 BECOME/train/BECOME_00418
9438 MANCHESTER/train/MANCHESTER_00158
9438 GROUND/train/GROUND_00275
9438 MASSIVE/train/MASSIVE_00391
9438 COUNTRY/train/COUNTRY_00608
9438 LEVELS/train/LEVELS_00774
9438 SPENDING/train/SPENDING_00044
9438 FOOTBALL/train/FOOTBALL_00158
9438 REPORT/train/REPORT_00851
9438 CONFERENCE/train/CONFERENCE_00310
9438 WORST/train/WORST_00076
9438 DEATH/test/DEATH_00043
9438 EVENTS/train/EVENTS_00464
9438 PRICE/train/PRICE_00392
9438 SINCE/train/SINCE_00539
9438 AFFAIRS/train/AFFAIRS_00843
9438 LATEST/train/LATEST_00598
9438 PARENTS/train/PARENTS_00108
9438 MILLIONS/train/MILLIONS_00793
9438 NUMBER/train/NUMBER_00475
9438 TRYING/train/TRYING_00927
9438 CAMERON/train/CAMERON_00789
9438 GEORGE/train/GEORGE_00909
9438 CONSERVATIVE/train/CONSERVATIVE_00979
9438 ALLOWED/train/ALLOWED_00116
9438 YEARS/train/YEARS_00495
9438 MEETING/train/MEETING_00669
9438 ACTION/train/ACTION_00008
9438 DEATH/train/DEATH_00417
9438 CURRENT/train/CURRENT_00464
9438 WEEKS/train/WEEKS_00004
9438 ASKING/train/ASKING_00973
9438 DESCRIBED/train/DESCRIBED_00291
9438 COURT/train/COURT_00546
9438 DOING/train/DOING_00102
9438 INQUIRY/train/INQUIRY_00159
9438 COURT/train/COURT_00395
9438 VIOLENCE/train/VIOLENCE_00856
9438 FORMER/train/FORMER_00314
9438 OPPOSITION/train/OPPOSITION_00707
9438 INDUSTRY/train/INDUSTRY_00933
9438 MONTH/train/MONTH_00125
9438 INVESTMENT/train/INVESTMENT_00410
9438 SEEMS/train/SEEMS_00335
9438 SENIOR/train/SENIOR_00935
9438 ENERGY/train/ENERGY_00912
9438 EDITOR/train/EDITOR_00460
9438 BUDGET/train/BUDGET_00838
9438 MILLION/train/MILLION_00457
9438 AMERICA/train/AMERICA_00801
9438 PRIVATE/train/PRIVATE_00554
9438 FACING/train/FACING_00808
9438 INQUIRY/train/INQUIRY_00141
9438 PROCESS/train/PROCESS_00057
9438 ECONOMY/train/ECONOMY_00019
9438 PHONE/train/PHONE_00918
9438 BETWEEN/train/BETWEEN_00061
9438 REFERENDUM/train/REFERENDUM_00465
9438 INQUIRY/train/INQUIRY_00969
9438 FACING/train/FACING_00302
9438 CALLED/train/CALLED_00282
9438 BUILDING/train/BUILDING_00487
9438 MISSING/train/MISSING_00161
9438 FIRST/test/FIRST_00007
9438 SECRETARY/train/SECRETARY_00873
9438 MANCHESTER/train/MANCHESTER_00352
9438 TOMORROW/train/TOMORROW_00881
9438 VOTERS/val/VOTERS_00039
9438 GUILTY/train/GUILTY_00853
9438 DETAILS/train/DETAILS_00713
9438 AMERICAN/train/AMERICAN_00771
9438 EDUCATION/train/EDUCATION_00178
9438 CHARGES/train/CHARGES_00791
9438 POLICE/train/POLICE_00605
9438 NUMBER/train/NUMBER_00625
9438 GIVEN/train/GIVEN_00923
9438 VIOLENCE/train/VIOLENCE_00309
9438 WANTED/train/WANTED_00859
9438 MANCHESTER/train/MANCHESTER_00202
9438 LEADERS/train/LEADERS_00840
9438 EXACTLY/train/EXACTLY_00223
9438 SERIOUS/train/SERIOUS_00748
9438 COMPANIES/train/COMPANIES_00932
9438 DESCRIBED/train/DESCRIBED_00254
9438 DAVID/train/DAVID_00471
9438 WELFARE/train/WELFARE_00410
9438 CHARGE/train/CHARGE_00200
9438 LATER/train/LATER_00261
9438 SYRIA/train/SYRIA_00277
9438 PRIVATE/train/PRIVATE_00909
9438 POLITICAL/train/POLITICAL_00982
9438 DECIDED/train/DECIDED_00125
9438 RUNNING/train/RUNNING_00419
9438 AFFAIRS/train/AFFAIRS_00475
9438 DEFICIT/train/DEFICIT_00150
9438 WATCHING/train/WATCHING_00662
9438 UNION/train/UNION_00767
9438 RUSSIAN/train/RUSSIAN_00817
9438 KILLED/train/KILLED_00668
9438 LOCAL/train/LOCAL_00390
9438 IRELAND/train/IRELAND_00753
9438 HUNDREDS/train/HUNDREDS_00314
9438 PRIVATE/train/PRIVATE_00852
9438 THOUGHT/train/THOUGHT_00875
9438 CHANGES/train/CHANGES_00154
9438 MISSING/train/MISSING_00027
9438 FORCES/train/FORCES_00891
9438 BLACK/train/BLACK_00594
9438 GAMES/train/GAMES_00725
9438 COUNTRIES/train/COUNTRIES_00906
9438 LEGAL/train/LEGAL_00138
9438 ALMOST/train/ALMOST_00501
9438 ASKING/train/ASKING_00942
9438 DETAILS/train/DETAILS_00418
9438 EDITOR/train/EDITOR_00182
9438 MAJOR/train/MAJOR_00272
9438 BUDGET/train/BUDGET_00962
9438 REPORT/train/REPORT_00311
9438 ATTACKS/train/ATTACKS_00626
9438 GEORGE/train/GEORGE_00524
9438 IRELAND/train/IRELAND_00941
9438 TAKEN/train/TAKEN_00793
9438 USING/train/USING_00395
9438 IRELAND/train/IRELAND_00887
9438 LATEST/train/LATEST_00044
9438 HEART/train/HEART_00748
9438 REPORTS/train/REPORTS_00511
9438 CALLED/train/CALLED_00836
9438 CHILDREN/train/CHILDREN_00750
9438 CALLED/train/CALLED_00405
9438 FAMILIES/train/FAMILIES_00604
9438 WORKERS/train/WORKERS_00423
9438 ALMOST/train/ALMOST_00037
9438 OPPOSITION/train/OPPOSITION_00607
9438 OPERATION/train/OPERATION_00274
9438 PLANS/val/PLANS_00007
9438 WEATHER/train/WEATHER_00852
9438 GOVERNMENT/train/GOVERNMENT_00794
9438 STORY/train/STORY_00868
9438 EDITOR/train/EDITOR_00928
9438 BUSINESS/train/BUSINESS_00763
9438 GOVERNMENT/train/GOVERNMENT_00868
9438 ACCUSED/train/ACCUSED_00569
9438 COMPANIES/train/COMPANIES_00132
9438 UNITED/train/UNITED_00860
9438 HEART/train/HEART_00639
9438 MANCHESTER/train/MANCHESTER_00140
9438 FAMILY/train/FAMILY_00705
9438 POLITICIANS/train/POLITICIANS_00184
9438 SENIOR/test/SENIOR_00036
9438 FORCES/train/FORCES_00894
9438 WELCOME/train/WELCOME_00795
9438 GENERAL/train/GENERAL_00098
9438 GERMANY/train/GERMANY_00285
9438 REPORTS/train/REPORTS_00734
9438 FACING/train/FACING_00666
9438 WANTED/train/WANTED_00737
9438 ASKING/train/ASKING_00038
9438 ARRESTED/train/ARRESTED_00476
9438 REPORTS/train/REPORTS_00414
9438 INDUSTRY/train/INDUSTRY_00507
9438 LITTLE/train/LITTLE_00681
9438 HEART/train/HEART_00237
9438 DURING/train/DURING_00698
9438 THOSE/train/THOSE_00287
9438 INDEPENDENT/train/INDEPENDENT_00169
9438 DESCRIBED/train/DESCRIBED_00662
9438 ABOUT/train/ABOUT_00732
9438 FOLLOWING/train/FOLLOWING_00119
9438 OFFICE/train/OFFICE_00742
9438 WITHIN/train/WITHIN_00882
9438 ASKING/train/ASKING_00367
9438 NIGHT/train/NIGHT_00602
9438 BRITISH/train/BRITISH_00717
9438 GUILTY/train/GUILTY_00656
9438 BEHIND/train/BEHIND_00229
9438 CANCER/train/CANCER_00132
9438 SOUTH/train/SOUTH_00695
9438 REPORTS/train/REPORTS_00495
9438 INDUSTRY/train/INDUSTRY_00573
9438 HAPPENED/train/HAPPENED_00196
9438 ARRESTED/train/ARRESTED_00825
9438 MILLION/val/MILLION_00011
9438 BILLION/train/BILLION_00263
9438 CAPITAL/train/CAPITAL_00112
9438 CLAIMS/train/CLAIMS_00735
9438 ANNOUNCED/train/ANNOUNCED_00016
9438 SIDES/train/SIDES_00219
9438 HAPPENED/train/HAPPENED_00780
9438 PLANS/train/PLANS_00772
9438 BRITAIN/train/BRITAIN_00904
9438 PLACE/train/PLACE_00840
9438 EVIDENCE/train/EVIDENCE_00021
9438 RESULT/train/RESULT_00602
9438 PRICES/train/PRICES_00425
9438 BENEFIT/train/BENEFIT_00529
9438 REPORTS/train/REPORTS_00965
9438 MAJOR/train/MAJOR_00994
9438 LATER/train/LATER_00267
9438 PHONE/train/PHONE_00948
9438 WORKERS/train/WORKERS_00076
9438 HEALTH/train/HEALTH_00376
9438 ALREADY/train/ALREADY_00717
9438 PHONE/test/PHONE_00023
9438 DAVID/train/DAVID_00120
9438 NORTH/train/NORTH_00849
9438 MINISTERS/train/MINISTERS_00883
9438 MIDDLE/train/MIDDLE_00357
9438 REPORTS/train/REPORTS_00628
9438 LONDON/train/LONDON_00560
9438 SOUTHERN/train/SOUTHERN_00488
9438 REFERENDUM/train/REFERENDUM_00374
9438 COURT/train/COURT_00166
9438 TODAY/train/TODAY_00923
9438 ARRESTED/train/ARRESTED_00229
9438 OPERATION/train/OPERATION_00018
9438 AFFAIRS/train/AFFAIRS_00732
9438 WORLD/train/WORLD_00504
9438 CAPITAL/train/CAPITAL_00224
9438 EDITOR/train/EDITOR_00940
9438 WANTED/train/WANTED_00116
9438 GEORGE/train/GEORGE_00146
9438 FINANCIAL/train/FINANCIAL_00621
9438 ENGLAND/train/ENGLAND_00535
9438 MONEY/train/MONEY_00055
9438 AGREE/train/AGREE_00547
9438 CURRENT/train/CURRENT_00829
9438 DAVID/train/DAVID_00641
9438 PRIME/train/PRIME_00287
9438 MANCHESTER/train/MANCHESTER_00935
9438 BIGGEST/train/BIGGEST_00150
9438 CUSTOMERS/train/CUSTOMERS_00389
9438 STORY/train/STORY_00101
9438 FAMILY/train/FAMILY_00080
9438 MASSIVE/train/MASSIVE_00282
9438 AGAIN/train/AGAIN_00848
9438 WALES/train/WALES_00813
9438 GAMES/train/GAMES_00704
9438 VICTIMS/train/VICTIMS_00123
9438 MINISTERS/train/MINISTERS_00824
9438 EVENTS/train/EVENTS_00839
9438 FAMILY/train/FAMILY_00700
9438 OFFICIALS/train/OFFICIALS_00327
9438 BIGGEST/train/BIGGEST_00534
9438 TRIAL/train/TRIAL_00323
9438 MINISTERS/train/MINISTERS_00852
9438 TODAY/train/TODAY_00677
9438 AFRICA/test/AFRICA_00044
9438 BIGGEST/train/BIGGEST_00713
9438 AROUND/train/AROUND_00013
9438 BECOME/train/BECOME_00985
9438 WORLD/train/WORLD_00410
9438 HUMAN/train/HUMAN_00281
9438 REPORT/train/REPORT_00502
9438 WOMEN/train/WOMEN_00369
9438 DECIDED/train/DECIDED_00489
9438 ACCUSED/train/ACCUSED_00761
9438 MORNING/train/MORNING_00332
9438 RECORD/train/RECORD_00029
9438 EDITOR/train/EDITOR_00331
9438 WARNING/train/WARNING_00291
9438 GERMANY/train/GERMANY_00633
9438 CUSTOMERS/train/CUSTOMERS_00020
9438 ARRESTED/train/ARRESTED_00128
9438 ENGLAND/train/ENGLAND_00386
9438 ATTACK/train/ATTACK_00757
9438 AFTER/train/AFTER_00277
9438 PRESS/train/PRESS_00382
9438 ABUSE/train/ABUSE_00197
9438 REPORTS/train/REPORTS_00609
9438 REPORTS/train/REPORTS_00062
9438 JAMES/train/JAMES_00342
9438 ATTACK/train/ATTACK_00146
9438 ACTION/train/ACTION_00778
9438 WEEKS/train/WEEKS_00499
9438 CRIME/train/CRIME_00233
9438 CONCERNS/train/CONCERNS_00614
9438 HAPPENED/train/HAPPENED_00469
9438 INQUIRY/train/INQUIRY_00274
9438 FOREIGN/train/FOREIGN_00824
9438 JUSTICE/test/JUSTICE_00032
9438 OUTSIDE/train/OUTSIDE_00245
9438 CALLED/train/CALLED_00857
9438 DETAILS/train/DETAILS_00012
9438 DECIDED/train/DECIDED_00204
9438 SYSTEM/train/SYSTEM_00881
9438 CHARGES/train/CHARGES_00604
9438 MILLIONS/train/MILLIONS_00436
9438 BORDER/train/BORDER_00832
9438 SERIOUS/train/SERIOUS_00486
9438 GOVERNMENT/train/GOVERNMENT_00995
9438 BETWEEN/train/BETWEEN_00889
9438 MEETING/train/MEETING_00798
9438 GROWING/train/GROWING_00648
9438 HUNDREDS/train/HUNDREDS_00039
9438 TRIAL/train/TRIAL_00389
9438 EVENING/train/EVENING_00854
9438 GUILTY/train/GUILTY_00114
9438 PRESSURE/train/PRESSURE_00306
9438 KNOWN/train/KNOWN_00212
9438 FORMER/train/FORMER_00714
9438 MINISTERS/train/MINISTERS_00098
9438 FURTHER/train/FURTHER_00315
9438 THIRD/train/THIRD_00014
9438 SIMPLY/train/SIMPLY_00060
9438 MONTH/train/MONTH_00599
9438 STAFF/train/STAFF_00384
9438 EUROPE/train/EUROPE_00599
9438 MEASURES/train/MEASURES_00812
9438 JAMES/train/JAMES_00599
9438 DEATH/train/DEATH_00444
9438 PARTY/train/PARTY_00864
9438 WALES/train/WALES_00356
9438 ASKING/train/ASKING_00514
9438 AFTER/train/AFTER_00471
9438 FINANCIAL/train/FINANCIAL_00261
9438 DEGREES/train/DEGREES_00764
9438 DEBATE/train/DEBATE_00460
9438 LONGER/train/LONGER_00049
9438 GUILTY/train/GUILTY_00561
9438 LIKELY/train/LIKELY_00871
9438 WINDS/train/WINDS_00459
9438 RECORD/train/RECORD_00260
9438 DESPITE/train/DESPITE_00219
9438 CHIEF/train/CHIEF_00089
9438 HISTORY/train/HISTORY_00206
9438 VICTIMS/train/VICTIMS_00764
9438 CHANCE/train/CHANCE_00900
9438 PRIVATE/train/PRIVATE_00765
9438 ENGLAND/train/ENGLAND_00766
9438 PLACE/train/PLACE_00559
9438 WARNING/train/WARNING_00642
9438 ANNOUNCED/train/ANNOUNCED_00678
9438 SENIOR/train/SENIOR_00850
9438 GAMES/train/GAMES_00176
9438 ALMOST/train/ALMOST_00984
9438 ENERGY/train/ENERGY_00455
9438 WATER/train/WATER_00551
9438 STILL/train/STILL_00113
9438 OPERATION/train/OPERATION_00626
9438 MONTH/train/MONTH_00521
9438 MISSING/train/MISSING_00834
9438 INDEPENDENT/train/INDEPENDENT_00556
9438 PATIENTS/train/PATIENTS_00026
9438 HUNDREDS/train/HUNDREDS_00370
9438 WALES/train/WALES_00786
9438 LABOUR/train/LABOUR_00378
9438 OTHERS/train/OTHERS_00686
9438 SOUTHERN/train/SOUTHERN_00002
9438 STORY/train/STORY_00797
9438 CHANGES/train/CHANGES_00031
9438 WEAPONS/train/WEAPONS_00155
9438 AFTER/train/AFTER_00150
9438 STAFF/train/STAFF_00747
9438 HOMES/train/HOMES_00604
9438 MEMBERS/train/MEMBERS_00206
9438 DAVID/train/DAVID_00703
9438 TRIAL/train/TRIAL_00932
9438 STAFF/train/STAFF_00130
9438 AMONG/train/AMONG_00784
9438 INCREASE/train/INCREASE_00337
9438 COURT/train/COURT_00511
9438 MURDER/train/MURDER_00746
9438 COUNTRY/train/COUNTRY_00804
9438 MEANS/train/MEANS_00711
9438 SCOTTISH/train/SCOTTISH_00873
9438 CONCERNS/train/CONCERNS_00520
9438 HOMES/train/HOMES_00390
9438 LEADERS/train/LEADERS_00214
9438 CHIEF/train/CHIEF_00103
9438 MANCHESTER/train/MANCHESTER_00258
9438 TAKEN/train/TAKEN_00370
9438 POINT/test/POINT_00039
9438 THOSE/train/THOSE_00663
9438 TOMORROW/train/TOMORROW_00396
9438 INSIDE/train/INSIDE_00255
9438 STREET/train/STREET_00643
9438 BILLION/train/BILLION_00529
9438 RECORD/train/RECORD_00624
9438 HOUSING/train/HOUSING_00386
9438 TRUST/train/TRUST_00644
9438 FIGURES/train/FIGURES_00915
9438 MONTH/train/MONTH_00879
9438 PHONE/train/PHONE_00997
9438 AMERICAN/train/AMERICAN_00658
9438 WEATHER/train/WEATHER_00911
9438 FOOTBALL/train/FOOTBALL_00985
9438 EMERGENCY/train/EMERGENCY_00216
9438 SUNDAY/train/SUNDAY_00984
9438 MARKET/train/MARKET_00591
9438 WORDS/train/WORDS_00320
9438 STAFF/train/STAFF_00894
9438 OPPOSITION/train/OPPOSITION_00396
9438 AMONG/train/AMONG_00446
9438 MASSIVE/train/MASSIVE_00318
9438 GAMES/train/GAMES_00224
9438 VICTIMS/train/VICTIMS_00563
9438 GUILTY/train/GUILTY_00519
9438 AGAIN/train/AGAIN_00387
9438 MIDDLE/train/MIDDLE_00175
9438 HISTORY/train/HISTORY_00746
9438 SEVERAL/train/SEVERAL_00311
9438 FRIDAY/train/FRIDAY_00745
9438 INCREASE/train/INCREASE_00096
9438 CRIME/train/CRIME_00742
9438 THING/train/THING_00990
9438 DECIDED/train/DECIDED_00712
9438 CASES/train/CASES_00322
9438 FORCES/train/FORCES_00102
9438 MANCHESTER/train/MANCHESTER_00482
9438 LABOUR/train/LABOUR_00892
9438 LEADER/train/LEADER_00339
9438 SEVEN/train/SEVEN_00392
9438 ABUSE/train/ABUSE_00445
9438 CALLED/train/CALLED_00743
9438 LATEST/train/LATEST_00591
9438 SPEAKING/train/SPEAKING_00541
9438 SINCE/train/SINCE_00988
9438 BENEFITS/train/BENEFITS_00055
9438 TRIAL/train/TRIAL_00857
9438 COUNCIL/train/COUNCIL_00201
9438 TERMS/train/TERMS_00843
9438 FINANCIAL/train/FINANCIAL_00681
9438 UNDER/train/UNDER_00091
9438 MINUTES/train/MINUTES_00160
9438 WORDS/train/WORDS_00166
9438 SCHOOLS/train/SCHOOLS_00787
9438 CHARGE/test/CHARGE_00046
9438 NUMBER/train/NUMBER_00238
9438 MEASURES/train/MEASURES_00232
9438 PRESSURE/train/PRESSURE_00564
9438 INSIDE/train/INSIDE_00585
9438 CONFERENCE/train/CONFERENCE_00092
9438 MILLION/train/MILLION_00954
9438 SHOULD/train/SHOULD_00346
9438 GOVERNMENT/train/GOVERNMENT_00490
9438 STORY/train/STORY_00326
9438 WORST/train/WORST_00132
9438 ATTACKS/train/ATTACKS_00904
9438 LATEST/train/LATEST_00639
9438 MILLION/train/MILLION_00949
9438 WELCOME/train/WELCOME_00843
9438 UNITED/train/UNITED_00957
9438 STAGE/train/STAGE_00436
9438 CHARGES/train/CHARGES_00767
9438 MEDICAL/train/MEDICAL_00883
9438 OBAMA/train/OBAMA_00004
9438 CHILDREN/train/CHILDREN_00215
9438 HUNDREDS/train/HUNDREDS_00629
9438 FAMILIES/train/FAMILIES_00352
9438 WORST/train/WORST_00798
9438 GIVEN/train/GIVEN_00934
9438 PARTS/train/PARTS_00694
9438 STATEMENT/train/STATEMENT_00156
9438 EVIDENCE/test/EVIDENCE_00044
9438 COURT/train/COURT_00604
9438 BEING/train/BEING_00640
9438 WANTED/train/WANTED_00903
9438 DAVID/train/DAVID_00676
9438 CONFLICT/train/CONFLICT_00784
9438 AMONG/train/AMONG_00055
9438 STAGE/train/STAGE_00631
9438 WORLD/train/WORLD_00585
9438 GAMES/train/GAMES_00163
9438 EDUCATION/test/EDUCATION_00020
9438 BENEFIT/train/BENEFIT_00440
9438 EARLY/train/EARLY_00737
9438 BUSINESS/train/BUSINESS_00769
9438 ACCORDING/train/ACCORDING_00717
9438 GUILTY/train/GUILTY_00451
9438 WEATHER/train/WEATHER_00060
9438 DESCRIBED/train/DESCRIBED_00010
9438 REFERENDUM/train/REFERENDUM_00651
9438 RETURN/train/RETURN_00134
9438 PHONE/train/PHONE_00220
9438 BRITAIN/train/BRITAIN_00440
9438 ARRESTED/train/ARRESTED_00242
9438 SPEND/train/SPEND_00213
9438 CLAIMS/train/CLAIMS_00405
9438 SEVEN/train/SEVEN_00231
9438 CRIME/train/CRIME_00246
9438 REPORTS/train/REPORTS_00706
9438 FOLLOWING/train/FOLLOWING_00394
9438 HUMAN/train/HUMAN_00792
9438 ABUSE/train/ABUSE_00507
9438 OTHER/train/OTHER_00654
9438 CHILDREN/train/CHILDREN_00358
9438 BORDER/train/BORDER_00813
9438 WELCOME/train/WELCOME_00141
9438 VICTIMS/train/VICTIMS_00248
9438 SECTOR/train/SECTOR_00863
9438 COMPANIES/train/COMPANIES_00161
9438 BEFORE/train/BEFORE_00350
9438 REPORT/train/REPORT_00970
9438 BUILD/train/BUILD_00112
9438 VICTIMS/train/VICTIMS_00541
9438 WESTERN/train/WESTERN_00560
9438 LEVEL/train/LEVEL_00566
9438 STREET/train/STREET_00465
9438 MEANS/train/MEANS_00625
9438 SENIOR/train/SENIOR_00057
9438 WEEKEND/train/WEEKEND_00196
9438 AFFAIRS/train/AFFAIRS_00092
9438 LONDON/train/LONDON_00023
9438 WOULD/train/WOULD_00227
9438 MEETING/train/MEETING_00875
9438 STORY/train/STORY_00521
9438 FRANCE/train/FRANCE_00750
9438 PARENTS/train/PARENTS_00994
9438 SERVICE/train/SERVICE_00713
9438 AFTER/train/AFTER_00437
9438 CHIEF/train/CHIEF_00069
9438 TONIGHT/train/TONIGHT_00752
9438 COMES/test/COMES_00021
9438 LONDON/train/LONDON_00223
9438 HOSPITAL/train/HOSPITAL_00417
9438 LIVES/train/LIVES_00530
9438 FUTURE/train/FUTURE_00722
9438 WHETHER/train/WHETHER_00217
9438 FACING/train/FACING_00491
9438 POWER/train/POWER_00526
9438 THOSE/train/THOSE_00660
9438 START/train/START_00032
9438 OPERATION/train/OPERATION_00385
9438 VICTIMS/train/VICTIMS_00536
9438 LOCAL/train/LOCAL_00657
9438 COMING/train/COMING_00858
9438 COMES/train/COMES_00371
9438 COUPLE/train/COUPLE_00102
9438 CRISIS/train/CRISIS_00117
9438 SPEECH/train/SPEECH_00409
9438 AMERICAN/train/AMERICAN_00665
9438 SIGNIFICANT/train/SIGNIFICANT_00756
9438 AMERICA/train/AMERICA_00293
9438 EDITOR/train/EDITOR_00435
9438 NATIONAL/train/NATIONAL_00088
9438 NATIONAL/train/NATIONAL_00620
9438 GAMES/train/GAMES_00446
9438 SEVERAL/train/SEVERAL_00696
9438 CUSTOMERS/train/CUSTOMERS_00295
9438 GUILTY/train/GUILTY_00742
9438 CAMERON/train/CAMERON_00360
9438 SYSTEM/train/SYSTEM_00034
9438 MEDICAL/train/MEDICAL_00372
9438 WELCOME/train/WELCOME_00060
9438 INTEREST/train/INTEREST_00814
9438 SITUATION/train/SITUATION_00393
9438 CHANGES/train/CHANGES_00637
9438 MESSAGE/train/MESSAGE_00755
9438 CHARGES/train/CHARGES_00526
9438 WORKERS/train/WORKERS_00465
9438 AMERICAN/train/AMERICAN_00485
9438 JAMES/train/JAMES_00474
9438 GROWING/train/GROWING_00646
9438 DESPITE/train/DESPITE_00651
9438 WORKERS/train/WORKERS_00257
9438 MEETING/train/MEETING_00713
9438 DECISION/test/DECISION_00029
9438 PLANS/train/PLANS_00034
9438 HOSPITAL/train/HOSPITAL_00583
9438 GIVING/train/GIVING_00652
9438 AGREE/train/AGREE_00757
9438 EVERYTHING/train/EVERYTHING_00222
9438 EXPECTED/train/EXPECTED_00447
9438 WELCOME/train/WELCOME_00822
9438 HOUSING/train/HOUSING_00446
9438 TAKEN/train/TAKEN_00203
9438 TAKING/train/TAKING_00067
9438 SPECIAL/train/SPECIAL_00980
9438 SERVICE/train/SERVICE_00315
9438 FRANCE/train/FRANCE_00195
9438 FACING/train/FACING_00955
9438 RIGHTS/train/RIGHTS_00699
9438 EARLY/train/EARLY_00163
9438 POLICE/train/POLICE_00508
9438 CUSTOMERS/train/CUSTOMERS_00240
9438 YEARS/train/YEARS_00914
9438 JUSTICE/train/JUSTICE_00382
9438 SIDES/train/SIDES_00138
9438 REPORTS/train/REPORTS_00654
9438 FAMILY/train/FAMILY_00397
9438 LEVELS/train/LEVELS_00947
9438 ALLOWED/train/ALLOWED_00195
9438 CHANGES/train/CHANGES_00514
9438 MONTH/train/MONTH_00271
9438 COMES/train/COMES_00968
9438 EMERGENCY/train/EMERGENCY_00204
9438 POLICE/train/POLICE_00649
9438 SERIES/train/SERIES_00029
9438 SPECIAL/train/SPECIAL_00090
9438 SINCE/train/SINCE_00784
9438 SEVEN/train/SEVEN_00879
9438 TAKING/train/TAKING_00329
9438 MINUTES/train/MINUTES_00907
9438 RESPONSE/test/RESPONSE_00048
9438 MEDICAL/train/MEDICAL_00485
9438 MANCHESTER/train/MANCHESTER_00426
9438 WITHIN/train/WITHIN_00167
9438 RESULT/train/RESULT_00057
9438 COMING/train/COMING_00534
9438 HOMES/train/HOMES_00728
9438 SUNDAY/train/SUNDAY_00781
9438 ANOTHER/train/ANOTHER_00248
9438 ATTACK/train/ATTACK_00218
9438 SERIES/train/SERIES_00542
9438 GEORGE/train/GEORGE_00151
9438 SECURITY/train/SECURITY_00448
9438 FINANCIAL/train/FINANCIAL_00371
9438 BECOME/train/BECOME_00290
9438 WORST/train/WORST_00676
9438 IMPACT/train/IMPACT_00409
9438 SENSE/train/SENSE_00531
9438 JAMES/train/JAMES_00734
9438 DESCRIBED/train/DESCRIBED_00267
9438 HEARD/train/HEARD_00968
9438 RECORD/train/RECORD_00797
9438 MINISTERS/train/MINISTERS_00951
9438 POLITICIANS/train/POLITICIANS_00107
9438 POLITICAL/train/POLITICAL_00030
9438 RUSSIA/train/RUSSIA_00548
9438 CHANGES/train/CHANGES_00291
9438 HOMES/train/HOMES_00028
9438 COUNTRIES/train/COUNTRIES_00998
9438 CALLED/train/CALLED_00584
9438 DESCRIBED/train/DESCRIBED_00870
9438 OTHERS/train/OTHERS_00887
9438 MONTHS/train/MONTHS_00891
9438 HUMAN/train/HUMAN_00497
9438 ITSELF/train/ITSELF_00311
9438 GUILTY/train/GUILTY_00846
9438 HAPPENED/train/HAPPENED_00729
9438 ENGLAND/train/ENGLAND_00595
9438 VICTIMS/train/VICTIMS_00185
9438 MAJOR/train/MAJOR_00475
9438 RATES/test/RATES_00027
9438 GAMES/train/GAMES_00715
9438 UNDER/train/UNDER_00916
9438 WINDS/train/WINDS_00679
9438 COMPANY/train/COMPANY_00217
9438 PROBLEMS/train/PROBLEMS_00773
9438 SERIES/train/SERIES_00133
9438 OFFICE/train/OFFICE_00777
9438 REASON/train/REASON_00428
9438 SERIOUS/train/SERIOUS_00108
9438 DURING/train/DURING_00278
9438 LATEST/train/LATEST_00507
9438 RULES/train/RULES_00656
9438 RATHER/train/RATHER_00424
9438 LEADER/train/LEADER_00221
9438 MATTER/train/MATTER_00528
9438 BETWEEN/test/BETWEEN_00045
9438 MARKET/train/MARKET_00878
9438 MEETING/train/MEETING_00601
9438 OFFICIALS/train/OFFICIALS_00031
9438 SYRIA/train/SYRIA_00111
9438 HOURS/train/HOURS_00650
9438 WHILE/train/WHILE_00147
9438 SENIOR/train/SENIOR_00020
9438 ACCORDING/train/ACCORDING_00767
9438 SPECIAL/train/SPECIAL_00763
9438 HOMES/train/HOMES_00779
9438 SIDES/train/SIDES_00507
9438 ANOTHER/train/ANOTHER_00652
9438 GOVERNMENT/train/GOVERNMENT_00646
9438 COMPANIES/train/COMPANIES_00773
9438 MEDICAL/train/MEDICAL_00454
9438 DEATH/train/DEATH_00424
9438 EXPECTED/train/EXPECTED_00121
9438 WATER/train/WATER_00214
9438 MEDICAL/train/MEDICAL_00156
9438 WAITING/train/WAITING_00435
9438 FORMER/train/FORMER_00945
9438 AFFAIRS/train/AFFAIRS_00607
9438 DESCRIBED/train/DESCRIBED_00044
9438 ACCUSED/train/ACCUSED_00049
9438 FOREIGN/train/FOREIGN_00279
9438 ARRESTED/train/ARRESTED_00872
9438 CUSTOMERS/train/CUSTOMERS_00429
9438 INFLATION/train/INFLATION_00395
9438 HEARD/train/HEARD_00408
9438 CALLED/train/CALLED_00953
9438 DAVID/train/DAVID_00061
9438 CHARGE/train/CHARGE_00443
9438 JAMES/train/JAMES_00155
9438 GUILTY/train/GUILTY_00014
9438 NOTHING/train/NOTHING_00165
9438 HOURS/train/HOURS_00624
9438 THREE/train/THREE_00221
9438 MOMENT/train/MOMENT_00540
9438 EVENING/train/EVENING_00735
9438 TALKING/train/TALKING_00373
9438 CAMPAIGN/train/CAMPAIGN_00407
9438 HEAVY/train/HEAVY_00199
9438 AFFECTED/train/AFFECTED_00352
9438 REPORT/train/REPORT_00914
9438 SERIES/train/SERIES_00167
9438 RIGHTS/val/RIGHTS_00046
9438 AFRICA/train/AFRICA_00453
9438 MEMBERS/train/MEMBERS_00055
9438 LONGER/train/LONGER_00537
9438 MIDDLE/train/MIDDLE_00085
9438 SHORT/train/SHORT_00597
9438 SCHOOLS/train/SCHOOLS_00887
9438 TOMORROW/val/TOMORROW_00045
9438 OBAMA/train/OBAMA_00192
9438 SERIES/train/SERIES_00342
9438 EUROPE/train/EUROPE_00970
9438 CHARGE/train/CHARGE_00467
9438 PERSON/train/PERSON_00637
9438 SYSTEM/train/SYSTEM_00242
9438 AGAINST/train/AGAINST_00055
9438 SPECIAL/train/SPECIAL_00691
9438 KILLED/train/KILLED_00400
9438 FOUND/train/FOUND_00593
9438 FINAL/train/FINAL_00261
9438 WHETHER/train/WHETHER_00022
9438 WELCOME/train/WELCOME_00632
9438 TRIAL/train/TRIAL_00903
9438 PARENTS/train/PARENTS_00069
9438 NUMBERS/train/NUMBERS_00158
9438 REALLY/train/REALLY_00490
9438 EARLY/test/EARLY_00028
9438 CAPITAL/train/CAPITAL_00028
9438 DETAILS/train/DETAILS_00904
9438 REPORT/train/REPORT_00461
9438 TRADE/train/TRADE_00569
9438 CHINA/train/CHINA_00314
9438 SMALL/train/SMALL_00800
9438 OPERATION/train/OPERATION_00013
9438 FAMILY/train/FAMILY_00237
9438 BECAUSE/train/BECAUSE_00640
9438 STARTED/train/STARTED_00939
9438 MAJORITY/train/MAJORITY_00825
9438 WINDS/train/WINDS_00703
9438 FOLLOWING/train/FOLLOWING_00001
9438 GREAT/train/GREAT_00983
9438 MESSAGE/train/MESSAGE_00175
9438 LEVELS/train/LEVELS_00915
9438 WATCHING/train/WATCHING_00682
9438 ACROSS/train/ACROSS_00738
9438 ECONOMY/train/ECONOMY_00020
9438 SPENDING/train/SPENDING_00500
9438 NUMBER/train/NUMBER_00390
9438 OFFICERS/train/OFFICERS_00633
9438 MEASURES/train/MEASURES_00581
9438 SIDES/train/SIDES_00844
9438 HOUSING/train/HOUSING_00273
9438 VICTIMS/train/VICTIMS_00075
9438 ALLEGATIONS/train/ALLEGATIONS_00236
9438 DURING/train/DURING_00975
9438 DEATH/test/DEATH_00003
9438 VIOLENCE/train/VIOLENCE_00418
9438 OFFICIALS/train/OFFICIALS_00463
9438 FUTURE/train/FUTURE_00402
9438 FIGHTING/train/FIGHTING_00219
9438 REPORTS/train/REPORTS_00505
9438 FOLLOWING/train/FOLLOWING_00532
9438 COMES/train/COMES_00821
9438 OPPOSITION/train/OPPOSITION_00121
9438 SPEAKING/train/SPEAKING_00425
9438 POLITICAL/train/POLITICAL_00660
9438 COUNCIL/train/COUNCIL_00226
9438 UNTIL/train/UNTIL_00300
9438 WATCHING/train/WATCHING_00691
9438 PHONE/train/PHONE_00949
9438 CLAIMS/train/CLAIMS_00111
9438 MURDER/train/MURDER_00656
9438 AFFAIRS/train/AFFAIRS_00343
9438 PARLIAMENT/train/PARLIAMENT_00610
9438 WELCOME/train/WELCOME_00933
9438 HOMES/train/HOMES_00997
9438 MASSIVE/train/MASSIVE_00008
9438 PLANS/train/PLANS_00991
9438 ANNOUNCED/train/ANNOUNCED_00513
9438 EDITOR/train/EDITOR_00436
9438 WELFARE/train/WELFARE_00643
9438 FAMILIES/train/FAMILIES_00280
9438 CHIEF/train/CHIEF_00473
9438 PRISON/train/PRISON_00044
9438 SERIES/train/SERIES_00817
9438 ALREADY/train/ALREADY_00502
9438 NORTH/train/NORTH_00229
9438 PHONE/train/PHONE_00225
9438 RECENT/test/RECENT_00016
9438 BENEFIT/train/BENEFIT_00711
9438 WANTS/train/WANTS_00150
9438 ACCORDING/train/ACCORDING_00688
9438 EUROPE/test/EUROPE_00014
9438 POLICY/train/POLICY_00882
9438 ACROSS/train/ACROSS_00033
9438 UNDER/train/UNDER_00851
9438 AMERICA/train/AMERICA_00851
9438 OPPOSITION/train/OPPOSITION_00824
9438 INQUIRY/train/INQUIRY_00262
9438 WESTMINSTER/train/WESTMINSTER_00380
9438 STAND/train/STAND_00562
9438 TODAY/train/TODAY_00432
9438 FORMER/train/FORMER_00778
9438 SECTOR/train/SECTOR_00032
9438 ALLOWED/train/ALLOWED_00151
9438 WALES/test/WALES_00029
9438 EDUCATION/train/EDUCATION_00351
9438 ASKING/train/ASKING_00677
9438 FINANCIAL/train/FINANCIAL_00682
9438 SIMPLY/train/SIMPLY_00206
9438 ARRESTED/train/ARRESTED_00197
9438 CAPITAL/train/CAPITAL_00732
9438 FORCES/train/FORCES_00734
9438 NORTHERN/train/NORTHERN_00568
9438 HUMAN/train/HUMAN_00884
9438 SERVICES/train/SERVICES_00115
9438 PRESIDENT/train/PRESIDENT_00701
9438 EUROPEAN/train/EUROPEAN_00391
9438 BIGGEST/train/BIGGEST_00654
9438 ISSUE/train/ISSUE_00086
9438 WRONG/train/WRONG_00014
9438 EDITOR/train/EDITOR_00618
9438 COULD/train/COULD_00863
9438 REFERENDUM/train/REFERENDUM_00913
9438 PARENTS/train/PARENTS_00294
9438 NEEDS/train/NEEDS_00298
9438 CHILDREN/train/CHILDREN_00833
9438 LATEST/train/LATEST_00186
9438 PLANS/train/PLANS_00112
9438 EDITOR/train/EDITOR_00060
9438 MEDICAL/train/MEDICAL_00268
9438 CHILD/train/CHILD_00429
9438 WAITING/train/WAITING_00507
9438 PLANS/train/PLANS_00793
9438 CHINA/train/CHINA_00693
9438 SIMPLY/train/SIMPLY_00316
9438 HEARD/train/HEARD_00234
9438 RESULT/train/RESULT_00050
9438 CAMERON/train/CAMERON_00851
9438 SPENT/train/SPENT_00381
9438 EXTRA/train/EXTRA_00309
9438 DETAILS/train/DETAILS_00165
9438 DEBATE/train/DEBATE_00108
9438 WORST/train/WORST_00862
9438 EMERGENCY/train/EMERGENCY_00358
9438 UNDER/train/UNDER_00477
9438 THREE/train/THREE_00943
9438 MAJORITY/train/MAJORITY_00302
9438 ATTACK/train/ATTACK_00415
9438 RIGHTS/train/RIGHTS_00185
9438 OPPOSITION/train/OPPOSITION_00311
9438 DECISION/train/DECISION_00683
9438 FIRST/train/FIRST_00139
9438 FACING/train/FACING_00475
9438 SCOTLAND/train/SCOTLAND_00492
9438 POTENTIAL/train/POTENTIAL_00430
9438 TRIAL/train/TRIAL_00679
9438 KILLED/test/KILLED_00036
9438 CLAIMS/train/CLAIMS_00706
9438 MINISTERS/train/MINISTERS_00676
9438 INQUIRY/train/INQUIRY_00474
9438 RATES/train/RATES_00605
9438 THEMSELVES/train/THEMSELVES_00875
9438 HEARD/train/HEARD_00721
9438 PERSON/train/PERSON_00320
9438 FORMER/train/FORMER_00679
9438 MILITARY/train/MILITARY_00959
9438 PHONE/train/PHONE_00787
9438 CHANGES/train/CHANGES_00896
9438 WEAPONS/train/WEAPONS_00367
9438 PRICE/train/PRICE_00118
9438 PRESIDENT/train/PRESIDENT_00703
9438 SERIES/train/SERIES_00253
9438 NORTHERN/train/NORTHERN_00741
9438 STAFF/train/STAFF_00296
9438 AMERICAN/train/AMERICAN_00277
9438 SINCE/train/SINCE_00859
9438 WORKING/train/WORKING_00979
9438 FIGURES/train/FIGURES_00200
9438 SERIOUS/train/SERIOUS_00980
9438 CHILD/train/CHILD_00839
9438 WORST/train/WORST_00662
9438 PRICES/train/PRICES_00407
9438 HUNDREDS/train/HUNDREDS_00331
9438 FURTHER/train/FURTHER_00210
9438 WATCHING/train/WATCHING_00727
9438 CLAIMS/train/CLAIMS_00469
9438 AFFAIRS/train/AFFAIRS_00329
9438 POLICY/train/POLICY_00871
9438 LOOKING/test/LOOKING_00026
9438 COMES/train/COMES_00219
9438 MEDIA/train/MEDIA_00096
9438 BUILD/test/BUILD_00018
9438 DAVID/train/DAVID_00656
9438 WOMEN/train/WOMEN_00340
9438 SECURITY/train/SECURITY_00488
9438 LEVELS/train/LEVELS_00371
9438 CONCERNS/train/CONCERNS_00027
9438 CHILDREN/train/CHILDREN_00913
9438 PRICES/train/PRICES_00783
9438 DURING/train/DURING_00494
9438 FACING/train/FACING_00508
9438 MINISTER/train/MINISTER_00895
9438 SINCE/train/SINCE_00594
9438 OPPOSITION/train/OPPOSITION_00242
9438 FOUND/train/FOUND_00841
9438 JUSTICE/train/JUSTICE_00649
9438 CALLED/train/CALLED_00566
9438 TALKING/train/TALKING_00475
9438 LEADER/train/LEADER_00128
9438 COMPANY/train/COMPANY_00114
9438 PRICES/train/PRICES_00694
9438 PRICE/train/PRICE_00908
9438 HEALTH/train/HEALTH_00589
9438 WOMEN/train/WOMEN_00977
9438 HAPPENING/train/HAPPENING_00788
9438 CHANCE/train/CHANCE_00802
9438 BETWEEN/train/BETWEEN_00488
9438 ORDER/train/ORDER_00730
9438 MEDICAL/train/MEDICAL_00148
9438 SECOND/train/SECOND_00520
9438 POWER/train/POWER_00205
9438 ENERGY/train/ENERGY_00923
9438 CUSTOMERS/train/CUSTOMERS_00591
9438 BRITISH/test/BRITISH_00018
9438 WESTMINSTER/train/WESTMINSTER_00096
9438 AGREE/train/AGREE_00084
9438 EXACTLY/train/EXACTLY_00431
9438 START/train/START_00911
9438 LABOUR/train/LABOUR_00075
9438 CALLED/train/CALLED_00154
9438 AFFECTED/train/AFFECTED_00315
9438 ITSELF/test/ITSELF_00041
9438 CANCER/train/CANCER_00524
9438 FOCUS/train/FOCUS_00403
9438 ENGLAND/train/ENGLAND_00187
9438 FOLLOWING/train/FOLLOWING_00603
9438 MEMBERS/test/MEMBERS_00049
9438 INDUSTRY/train/INDUSTRY_00884
9438 NORTH/train/NORTH_00391
9438 AFFAIRS/train/AFFAIRS_00572
9438 CONTROL/val/CONTROL_00044
9438 VIOLENCE/train/VIOLENCE_00625
9438 ALLOWED/train/ALLOWED_00514
9438 AFRICA/train/AFRICA_00948
9438 CANCER/train/CANCER_00779
9438 UNITED/train/UNITED_00003
9438 SERIOUS/train/SERIOUS_00338
9438 WELCOME/train/WELCOME_00270
9438 ACCUSED/train/ACCUSED_00105
9438 MILLION/train/MILLION_00951
9438 SENIOR/train/SENIOR_00081
9438 FRONT/train/FRONT_00299
9438 EARLY/train/EARLY_00994
9438 REPORTS/train/REPORTS_00901
9438 QUESTIONS/train/QUESTIONS_00842
9438 PATIENTS/train/PATIENTS_00564
9438 EMERGENCY/train/EMERGENCY_00514
9438 EDITOR/train/EDITOR_00397
9438 BRITISH/train/BRITISH_00972
9438 CRISIS/train/CRISIS_00038
9438 MINISTERS/train/MINISTERS_00078
9438 MARKET/train/MARKET_00026
9438 AREAS/train/AREAS_00713
9438 LABOUR/train/LABOUR_00674
9438 POLICE/train/POLICE_00146
9438 MURDER/train/MURDER_00730
9438 LEAST/train/LEAST_00725
9438 ACCORDING/train/ACCORDING_00186
9438 CAMPAIGN/train/CAMPAIGN_00065
9438 SPEAKING/train/SPEAKING_00380
9438 PRISON/train/PRISON_00738
9438 AFFAIRS/train/AFFAIRS_00790
9438 OPPOSITION/train/OPPOSITION_00658
9438 STORY/train/STORY_00601
9438 CONCERNS/train/CONCERNS_00236
9438 WHILE/train/WHILE_00052
9438 FINANCIAL/train/FINANCIAL_00976
9438 BIGGEST/test/BIGGEST_00037
9438 WORLD/train/WORLD_00289
9438 NIGHT/train/NIGHT_00967
9438 ANSWER/train/ANSWER_00527
9438 CONSERVATIVE/train/CONSERVATIVE_00336
9438 CHARGES/train/CHARGES_00757
9438 SCHOOLS/train/SCHOOLS_00484
9438 SCHOOL/train/SCHOOL_00560
9438 GIVEN/train/GIVEN_00234
9438 ANOTHER/train/ANOTHER_00550
9438 ENERGY/train/ENERGY_00017
9438 FAMILIES/train/FAMILIES_00081
9438 CANCER/train/CANCER_00639
9438 STILL/train/STILL_00622
9438 FIRST/train/FIRST_00562
9438 CAMERON/train/CAMERON_00688
9438 HIGHER/train/HIGHER_00563
9438 OUTSIDE/train/OUTSIDE_00778
9438 PLANS/train/PLANS_00246
9438 GAMES/train/GAMES_00577
9438 THOUGHT/train/THOUGHT_00063
9438 DIFFERENCE/train/DIFFERENCE_00330
9438 PLANS/train/PLANS_00600
9438 CANCER/train/CANCER_00165
9438 PATIENTS/train/PATIENTS_00696
9438 DURING/train/DURING_00120
9438 RULES/train/RULES_00859
9438 ASKED/train/ASKED_00860
9438 FINAL/train/FINAL_00989
9438 MINUTES/train/MINUTES_00015
9438 WANTS/train/WANTS_00631
9438 FOLLOWING/train/FOLLOWING_00321
9438 SYRIA/train/SYRIA_00591
9438 TRIAL/train/TRIAL_00860
9438 DESCRIBED/train/DESCRIBED_00272
9438 EDUCATION/train/EDUCATION_00008
9438 ACCORDING/val/ACCORDING_00021
9438 RETURN/train/RETURN_00247
9438 OFTEN/train/OFTEN_00491
9438 START/train/START_00481
9438 ISSUE/train/ISSUE_00524
9438 MANCHESTER/train/MANCHESTER_00041
9438 INDEPENDENT/train/INDEPENDENT_00491
9438 MURDER/train/MURDER_00451
9438 SOUTHERN/train/SOUTHERN_00437
9438 RUNNING/train/RUNNING_00085
9438 PRESSURE/train/PRESSURE_00524
9438 SIGNIFICANT/train/SIGNIFICANT_00204
9438 YOUNG/train/YOUNG_00288
9438 PATIENTS/val/PATIENTS_00035
9438 ALMOST/train/ALMOST_00281
9438 MONTH/train/MONTH_00982
9438 SCHOOL/train/SCHOOL_00697
9438 REPORTS/train/REPORTS_00704
9438 MURDER/train/MURDER_00833
9438 TRYING/train/TRYING_00455
9438 TAKING/train/TAKING_00357
9438 MURDER/train/MURDER_00589
9438 FOLLOWING/train/FOLLOWING_00625
9438 INFLATION/train/INFLATION_00649
9438 DEATH/train/DEATH_00571
9438 GOVERNMENT/train/GOVERNMENT_00994
9438 REPORT/train/REPORT_00651
9438 MAJOR/train/MAJOR_00932
9438 MEDICAL/train/MEDICAL_00583
9438 ANNOUNCED/train/ANNOUNCED_00232
9438 AFRICA/train/AFRICA_00454
9438 TONIGHT/train/TONIGHT_00603
9438 TODAY/train/TODAY_00841
9438 ACROSS/train/ACROSS_00541
9438 THOUSANDS/train/THOUSANDS_00216
9438 TRIAL/test/TRIAL_00050
9438 MONTH/train/MONTH_00206
9438 WRONG/train/WRONG_00248
9438 ASKING/train/ASKING_00090
9438 WALES/train/WALES_00922
9438 VICTIMS/train/VICTIMS_00432
9438 GROUND/train/GROUND_00006
9438 COMES/train/COMES_00344
9438 ARRESTED/train/ARRESTED_00392
9438 EVENING/train/EVENING_00841
9438 WORKING/train/WORKING_00705
9438 CONFLICT/train/CONFLICT_00312
9438 SHORT/train/SHORT_00113
9438 OFFICIALS/test/OFFICIALS_00044
9438 SOMEONE/train/SOMEONE_00611
9438 LEADERSHIP/train/LEADERSHIP_00713
9438 WALES/train/WALES_00643
9438 BROUGHT/train/BROUGHT_00291
9438 JAMES/train/JAMES_00437
9438 UNDER/train/UNDER_00983
9438 VIOLENCE/train/VIOLENCE_00146
9438 GROWING/train/GROWING_00425
9438 FOLLOWING/train/FOLLOWING_00541
9438 LARGE/train/LARGE_00147
9438 PRICE/train/PRICE_00102
9438 GUILTY/train/GUILTY_00216
9438 WHICH/train/WHICH_00129
9438 CURRENT/train/CURRENT_00154
9438 COUNTRY/train/COUNTRY_00363
9438 MANCHESTER/train/MANCHESTER_00247
9438 SECRETARY/train/SECRETARY_00693
9438 MEANS/train/MEANS_00135
9438 PLANS/train/PLANS_00892
9438 JAMES/train/JAMES_00767
9438 SEVERAL/train/SEVERAL_00548
9438 AFFAIRS/test/AFFAIRS_00025
9438 BENEFITS/train/BENEFITS_00569
9438 WEATHER/train/WEATHER_00377
9438 CONCERNS/train/CONCERNS_00384
9438 MEMBERS/train/MEMBERS_00771
9438 BECAUSE/train/BECAUSE_00842
9438 SITUATION/train/SITUATION_00127
9438 SENIOR/train/SENIOR_00189
9438 GROUP/train/GROUP_00234
9438 MEETING/train/MEETING_00063
9438 CHILD/train/CHILD_00029
9438 CONTROL/train/CONTROL_00601
9438 AGAINST/train/AGAINST_00854
9438 THEIR/train/THEIR_00433
9438 WHILE/train/WHILE_00376
9438 JUSTICE/train/JUSTICE_00326
9438 MINISTERS/train/MINISTERS_00683
9438 MINISTERS/train/MINISTERS_00913
9438 FACING/train/FACING_00007
9438 MILLION/train/MILLION_00606
9438 ASKING/train/ASKING_00326
9438 ANSWER/test/ANSWER_00048
9438 THREE/test/THREE_00011
9438 COULD/train/COULD_00120
9438 HAPPENING/train/HAPPENING_00755
9438 DESCRIBED/train/DESCRIBED_00338
9438 TONIGHT/train/TONIGHT_00097
9438 HUNDREDS/train/HUNDREDS_00584
9438 ALREADY/test/ALREADY_00015
9438 SINCE/train/SINCE_00139
9438 UNDER/test/UNDER_00040
9438 INSIDE/train/INSIDE_00458
9438 DIFFICULT/train/DIFFICULT_00765
9438 FRONT/train/FRONT_00059
9438 MURDER/train/MURDER_00027
9438 GUILTY/train/GUILTY_00193
9438 CALLED/train/CALLED_00608
9438 SERIES/train/SERIES_00571
9438 GETTING/train/GETTING_00232
9438 SERVICE/train/SERVICE_00556
9438 BECOME/train/BECOME_00751
9438 PARTIES/train/PARTIES_00980
9438 PRICE/train/PRICE_00620
9438 GEORGE/train/GEORGE_00241
9438 SPEAKING/train/SPEAKING_00413
9438 SCOTLAND/train/SCOTLAND_00501
9438 ACCUSED/train/ACCUSED_00781
9438 SEVEN/train/SEVEN_00528
9438 HOMES/train/HOMES_00200
9438 BECOME/train/BECOME_00343
9438 WELCOME/train/WELCOME_00387
9438 SPECIAL/train/SPECIAL_00426
9438 GAMES/train/GAMES_00914
9438 DOING/train/DOING_00837
9438 MAJOR/test/MAJOR_00027
9438 SYRIAN/train/SYRIAN_00821
9438 WOMEN/train/WOMEN_00673
9438 MESSAGE/train/MESSAGE_00995
9438 AFFAIRS/train/AFFAIRS_00594
9438 VICTIMS/train/VICTIMS_00865
9438 CASES/train/CASES_00828
9438 COMPANY/train/COMPANY_00529
9438 ACTION/train/ACTION_00904
9438 PRESIDENT/train/PRESIDENT_00978
9438 SECOND/train/SECOND_00092
9438 RECORD/train/RECORD_00501
9438 HUNDREDS/train/HUNDREDS_00171
9438 ASKED/train/ASKED_00649
9438 ECONOMY/train/ECONOMY_00798
9438 AFTER/train/AFTER_00039
9438 ABUSE/train/ABUSE_00914
9438 POSSIBLE/train/POSSIBLE_00461
9438 EVENING/train/EVENING_00930
9438 OFFICE/train/OFFICE_00757
9438 ACCUSED/train/ACCUSED_00984
9438 SOCIAL/train/SOCIAL_00299
9438 COUPLE/train/COUPLE_00910
9438 GAMES/train/GAMES_00239
9438 LEADER/train/LEADER_00452
9438 FIRST/train/FIRST_00947
9438 WESTERN/train/WESTERN_00050
9438 HOURS/train/HOURS_00268
9438 ASKING/train/ASKING_00293
9438 QUESTION/train/QUESTION_00040
9438 LEGAL/train/LEGAL_00787
9438 MONTHS/train/MONTHS_00381
9438 ARRESTED/train/ARRESTED_00617
9438 WORLD/train/WORLD_00926
9438 ARRESTED/train/ARRESTED_00797
9438 PRICES/train/PRICES_00450
9438 ATTACK/train/ATTACK_00538
9438 TOMORROW/train/TOMORROW_00390
9438 INVOLVED/train/INVOLVED_00340
9438 EDITOR/train/EDITOR_00685
9438 JAMES/train/JAMES_00086
9438 DESCRIBED/train/DESCRIBED_00737
9438 FINAL/train/FINAL_00947
9438 PROCESS/train/PROCESS_00300
9438 IMMIGRATION/train/IMMIGRATION_00676
9438 EDITOR/train/EDITOR_00806
9438 TOMORROW/train/TOMORROW_00633
9438 DESCRIBED/train/DESCRIBED_00678
9438 WESTMINSTER/train/WESTMINSTER_00027
9438 FINANCIAL/train/FINANCIAL_00719
9438 GUILTY/train/GUILTY_00483
9438 FRANCE/train/FRANCE_00102
9438 ALLEGATIONS/train/ALLEGATIONS_00113
9438 LEADERSHIP/train/LEADERSHIP_00704
9438 SITUATION/train/SITUATION_00353
9438 BECOME/train/BECOME_00650
9438 ACCESS/train/ACCESS_00508
9438 NUMBER/train/NUMBER_00594
9438 BRING/train/BRING_00322
9438 INQUIRY/train/INQUIRY_00929
9438 MEDICAL/train/MEDICAL_00346
9438 NIGHT/test/NIGHT_00029
9438 HOMES/train/HOMES_00647
9438 MILLIONS/test/MILLIONS_00013
9438 BENEFIT/train/BENEFIT_00439
9438 OFFICERS/train/OFFICERS_00814
9438 BLACK/test/BLACK_00035
9438 ENGLAND/test/ENGLAND_00010
9438 RATES/train/RATES_00894
9438 ANNOUNCED/val/ANNOUNCED_00029
9438 LEGAL/train/LEGAL_00206
9438 BORDER/train/BORDER_00914
9438 LIVING/train/LIVING_00151
9438 LEGAL/train/LEGAL_00333
9438 PERSONAL/train/PERSONAL_00619
9438 LATEST/train/LATEST_00991
9438 RESPONSE/train/RESPONSE_00119
9438 STORY/train/STORY_00709
9438 HOSPITAL/train/HOSPITAL_00876
9438 ECONOMIC/train/ECONOMIC_00034
9438 CAMERON/train/CAMERON_00649
9438 HEARD/train/HEARD_00716
9438 WARNING/train/WARNING_00704
9438 GOVERNMENT/train/GOVERNMENT_00620
9438 MESSAGE/train/MESSAGE_00099
9438 CLAIMS/train/CLAIMS_00312
9438 TONIGHT/train/TONIGHT_00196
9438 WEEKEND/train/WEEKEND_00002
9438 WHILE/train/WHILE_00915
9438 BLACK/train/BLACK_00085
9438 SOUTH/train/SOUTH_00160
9438 ATTACKS/train/ATTACKS_00913
9438 PRIVATE/train/PRIVATE_00396
9438 COUNCIL/train/COUNCIL_00239
9438 ABOUT/train/ABOUT_00069
9438 LOOKING/test/LOOKING_00030
9438 AFTER/train/AFTER_00313
9438 BUSINESS/train/BUSINESS_00997
9438 SERVICES/train/SERVICES_00947
9438 ALMOST/train/ALMOST_00658
9438 BILLION/train/BILLION_00247
9438 CASES/train/CASES_00492
9438 WORST/train/WORST_00635
9438 LITTLE/train/LITTLE_00682
9438 SPEND/train/SPEND_00719
9438 WEEKEND/train/WEEKEND_00042
9438 COMPANY/test/COMPANY_00047
9438 OPERATION/train/OPERATION_00837
9438 MINISTER/train/MINISTER_00653
9438 INQUIRY/train/INQUIRY_00093
9438 LEADERS/train/LEADERS_00265
9438 INVOLVED/train/INVOLVED_00775
9438 BORDER/train/BORDER_00902
9438 DESCRIBED/test/DESCRIBED_00046
9438 OFFICE/train/OFFICE_00275
9438 LEAST/train/LEAST_00447
9438 SYRIAN/train/SYRIAN_00582
9438 JUSTICE/train/JUSTICE_00342
9438 SAYING/train/SAYING_00976
9438 COMES/train/COMES_00767
9438 WITHIN/train/WITHIN_00065
9438 SIMPLY/train/SIMPLY_00943
9438 ENGLAND/train/ENGLAND_00184
9438 AUTHORITIES/train/AUTHORITIES_00728
9438 LIVING/train/LIVING_00830
9438 ARRESTED/train/ARRESTED_00665
9438 FORMER/train/FORMER_00967
9438 JAMES/train/JAMES_00578
9438 BECOME/train/BECOME_00812
9438 QUESTION/train/QUESTION_00397
9438 CONCERNS/train/CONCERNS_00101
9438 YOUNG/train/YOUNG_00528
9438 SPEECH/train/SPEECH_00209
9438 SEEMS/train/SEEMS_00274
9438 LIVES/train/LIVES_00695
9438 WORLD/train/WORLD_00378
9438 UNION/train/UNION_00153
9438 WATCHING/train/WATCHING_00809
9438 PATIENTS/train/PATIENTS_00796
9438 CAMERON/train/CAMERON_00543
9438 GAMES/train/GAMES_00309
9438 DETAILS/train/DETAILS_00130
9438 HUNDREDS/train/HUNDREDS_00201
9438 MINUTES/train/MINUTES_00674
9438 JAMES/train/JAMES_00274
9438 CONSERVATIVE/train/CONSERVATIVE_00218
9438 STILL/train/STILL_00523
9438 YOUNG/train/YOUNG_00645
9438 ENGLAND/test/ENGLAND_00004
9438 MEMBERS/train/MEMBERS_00252
9438 FRANCE/train/FRANCE_00470
9438 EDITOR/train/EDITOR_00300
9438 WAITING/train/WAITING_00370
9438 REPORTS/train/REPORTS_00340
9438 JAMES/train/JAMES_00404
9438 MAYBE/train/MAYBE_00451
9438 AHEAD/train/AHEAD_00846
9438 BENEFITS/val/BENEFITS_00034
9438 OFFICERS/train/OFFICERS_00896
9438 QUESTIONS/train/QUESTIONS_00885
9438 MEASURES/train/MEASURES_00125
9438 BANKS/train/BANKS_00073
9438 ASKING/train/ASKING_00029
9438 PRISON/train/PRISON_00922
9438 GREECE/train/GREECE_00031
9438 CHIEF/train/CHIEF_00529
9438 MINUTES/test/MINUTES_00033
9438 BUSINESSES/train/BUSINESSES_00706
9438 LATEST/train/LATEST_00761
9438 WHILE/train/WHILE_00786
9438 ANYTHING/train/ANYTHING_00950
9438 CHIEF/test/CHIEF_00031
9438 EVERYONE/train/EVERYONE_00400
9438 FRONT/train/FRONT_00747
9438 SPENDING/train/SPENDING_00838
9438 RECORD/train/RECORD_00238
9438 COULD/train/COULD_00623
9438 LATEST/train/LATEST_00062
9438 PLACE/train/PLACE_00950
9438 GREAT/train/GREAT_00829
9438 FOUND/train/FOUND_00108
9438 LARGE/train/LARGE_00751
9438 ARRESTED/train/ARRESTED_00506
9438 CHARGE/train/CHARGE_00007
9438 WORST/train/WORST_00666
9438 GEORGE/train/GEORGE_00537
9438 MEDICAL/train/MEDICAL_00011
9438 SPEAKING/train/SPEAKING_00866
9438 PARTY/test/PARTY_00018
9438 KILLED/train/KILLED_00249
9438 CAPITAL/train/CAPITAL_00247
9438 THEMSELVES/train/THEMSELVES_00739
9438 ASKING/train/ASKING_00197
9438 FAMILIES/test/FAMILIES_00006
9438 CAPITAL/train/CAPITAL_00452
9438 BENEFIT/train/BENEFIT_00194
9438 STAGE/train/STAGE_00767
9438 BORDER/train/BORDER_00056
9438 FOOTBALL/train/FOOTBALL_00825
9438 COMES/train/COMES_00377
9438 SENIOR/train/SENIOR_00956
9438 CHALLENGE/train/CHALLENGE_00575
9438 MIGHT/train/MIGHT_00575
9438 RECORD/train/RECORD_00665
9438 BEHIND/train/BEHIND_00842
9438 ARRESTED/train/ARRESTED_00562
9438 STREET/train/STREET_00160
9438 MONTHS/train/MONTHS_00130
9438 WORST/train/WORST_00368
9438 SECRETARY/train/SECRETARY_00892
9438 BRITISH/train/BRITISH_00819
9438 NEEDS/train/NEEDS_00962
9438 BENEFITS/train/BENEFITS_00932
9438 AMERICAN/train/AMERICAN_00466
9438 SECRETARY/train/SECRETARY_00375
9438 PRISON/val/PRISON_00011
9438 CONSERVATIVE/train/CONSERVATIVE_00781
9438 AMONG/train/AMONG_00649
9438 SCHOOL/train/SCHOOL_00468
9438 SPECIAL/train/SPECIAL_00889
9438 MIGRANTS/test/MIGRANTS_00034
9438 SMALL/train/SMALL_00721
9438 HIGHER/train/HIGHER_00385
9438 SOMETHING/train/SOMETHING_00038
9438 SYSTEM/train/SYSTEM_00071
9438 MURDER/train/MURDER_00142
9438 WEATHER/train/WEATHER_00512
9438 SPEECH/train/SPEECH_00666
9438 YEARS/train/YEARS_00839
9438 THOUSANDS/test/THOUSANDS_00045
9438 SERIES/train/SERIES_00340
9438 MEANS/train/MEANS_00700
9438 KILLED/train/KILLED_00748
9438 REPORTS/train/REPORTS_00715
9438 BRING/train/BRING_00596
9438 BUDGET/train/BUDGET_00250
9438 WALES/train/WALES_00899
9438 HOSPITAL/train/HOSPITAL_00771
9438 MORNING/train/MORNING_00409
9438 WELCOME/train/WELCOME_00918
9438 SUPPORT/train/SUPPORT_00558
9438 GROWING/train/GROWING_00316
9438 AMONG/train/AMONG_00349
9438 BIGGEST/train/BIGGEST_00350
9438 WOMEN/train/WOMEN_00667
9438 THREE/train/THREE_00439
9438 SCOTTISH/train/SCOTTISH_00478
9438 WAITING/train/WAITING_00288
9438 WRONG/train/WRONG_00780
9438 POSSIBLE/train/POSSIBLE_00930
9438 LATEST/train/LATEST_00668
9438 ISSUE/train/ISSUE_00431
9438 WESTMINSTER/train/WESTMINSTER_00726
9438 MOMENT/train/MOMENT_00255
9438 WOMEN/train/WOMEN_00159
9438 EUROPEAN/train/EUROPEAN_00971
9438 ANOTHER/train/ANOTHER_00082
9438 FORCE/train/FORCE_00100
9438 RATES/train/RATES_00788
9438 SPEECH/test/SPEECH_00020
9438 SOCIAL/train/SOCIAL_00140
9438 DEGREES/train/DEGREES_00799
9438 ALLOW/train/ALLOW_00277
9438 REPORT/train/REPORT_00592
9438 MONTHS/train/MONTHS_00644
9438 AUTHORITIES/train/AUTHORITIES_00520
9438 CAMERON/train/CAMERON_00239
9438 SENIOR/train/SENIOR_00009
9438 HUNDREDS/train/HUNDREDS_00209
9438 WRONG/train/WRONG_00161
9438 CHANGES/train/CHANGES_00313
9438 PLANS/train/PLANS_00375
9438 JAMES/train/JAMES_00442
9438 GLOBAL/train/GLOBAL_00752
9438 REPORT/train/REPORT_00281
9438 BUSINESSES/train/BUSINESSES_00380
9438 BUILDING/train/BUILDING_00586
9438 CASES/train/CASES_00834
9438 DESCRIBED/train/DESCRIBED_00931
9438 BEFORE/train/BEFORE_00368
9438 WRONG/train/WRONG_00435
9438 HEARD/train/HEARD_00836
9438 GROUND/train/GROUND_00132
9438 ATTACKS/train/ATTACKS_00283
9438 AROUND/val/AROUND_00041
9438 AFRICA/train/AFRICA_00647
9438 FIGURES/train/FIGURES_00543
9438 SPEAKING/train/SPEAKING_00465
9438 SERIES/train/SERIES_00279
9438 START/train/START_00254
9438 GAMES/train/GAMES_00919
9438 CURRENT/train/CURRENT_00709
9438 COMPANY/train/COMPANY_00398
9438 BRITISH/train/BRITISH_00705
9438 INDEPENDENT/train/INDEPENDENT_00472
9438 PRESS/train/PRESS_00196
9438 AMERICAN/train/AMERICAN_00815
9438 GUILTY/train/GUILTY_00252
9438 QUESTIONS/train/QUESTIONS_00365
9438 REPORT/train/REPORT_00136
9438 EMERGENCY/train/EMERGENCY_00028
9438 WHERE/train/WHERE_00142
9438 LEADERS/train/LEADERS_00972
9438 YOUNG/train/YOUNG_00295
9438 PROBLEMS/train/PROBLEMS_00896
9438 ACTION/train/ACTION_00402
9438 SCHOOL/train/SCHOOL_00224
9438 LIVING/train/LIVING_00785
9438 SCOTTISH/train/SCOTTISH_00468
9438 LOCAL/train/LOCAL_00646
9438 ENERGY/train/ENERGY_00434
9438 THIRD/train/THIRD_00401
9438 TAKEN/train/TAKEN_00908
9438 CHIEF/train/CHIEF_00826
9438 BORDER/train/BORDER_00921
9438 RECORD/train/RECORD_00978
9438 FAMILY/train/FAMILY_00348
9438 AHEAD/train/AHEAD_00400
9438 STORY/train/STORY_00311
9438 STORY/train/STORY_00021
9438 SENIOR/train/SENIOR_00238
9438 CAPITAL/train/CAPITAL_00219
9438 ALLOWED/train/ALLOWED_00647
9438 ACCUSED/train/ACCUSED_00452
9438 RECORD/train/RECORD_00940
9438 TODAY/train/TODAY_00505
9438 GIVEN/train/GIVEN_00472
9438 THREE/test/THREE_00026
9438 SERVICES/train/SERVICES_00552
9438 AFFAIRS/test/AFFAIRS_00027
9438 STORY/train/STORY_00839
9438 AGAINST/train/AGAINST_00648
9438 LONDON/train/LONDON_00802
9438 CAMERON/train/CAMERON_00099
9438 LEGAL/train/LEGAL_00110
9438 SINCE/train/SINCE_00367
9438 POSSIBLE/train/POSSIBLE_00798
9438 INQUIRY/train/INQUIRY_00613
9438 SCOTTISH/train/SCOTTISH_00476
9438 OFFICERS/train/OFFICERS_00621
9438 WORKERS/train/WORKERS_00012
9438 STORY/train/STORY_00731
9438 DAVID/train/DAVID_00338
9438 PUBLIC/train/PUBLIC_00785
9438 PROVIDE/train/PROVIDE_00667
9438 ELECTION/train/ELECTION_00202
9438 VICTIMS/train/VICTIMS_00640
9438 UNTIL/train/UNTIL_00496
9438 AROUND/train/AROUND_00267
9438 NEEDS/train/NEEDS_00600
9438 LATEST/train/LATEST_00744
9438 COUNCIL/train/COUNCIL_00116
9438 ACCUSED/train/ACCUSED_00942
9438 AMERICAN/train/AMERICAN_00977
9438 POINT/train/POINT_00646
9438 GIVING/train/GIVING_00758
9438 SEVERAL/test/SEVERAL_00005
9438 DURING/train/DURING_00360
9438 GETTING/test/GETTING_00050
9438 ALLEGATIONS/train/ALLEGATIONS_00432
9438 INFORMATION/train/INFORMATION_00439
9438 BEHIND/train/BEHIND_00458
9438 ALMOST/train/ALMOST_00534
9438 WHETHER/train/WHETHER_00002
9438 MILLION/train/MILLION_00050
9438 AFFAIRS/train/AFFAIRS_00612
9438 PLANS/train/PLANS_00525
9438 AFRICA/train/AFRICA_00713
9438 LITTLE/train/LITTLE_00224
9438 INFLATION/train/INFLATION_00639
9438 BUSINESS/train/BUSINESS_00286
9438 UNTIL/train/UNTIL_00066
9438 INCREASE/train/INCREASE_00529
9438 TOGETHER/train/TOGETHER_00705
9438 STATEMENT/train/STATEMENT_00472
9438 JAMES/train/JAMES_00738
9438 RETURN/train/RETURN_00760
9438 THIRD/train/THIRD_00431
9438 WELCOME/train/WELCOME_00729
9438 GAMES/train/GAMES_00575
9438 PAYING/train/PAYING_00638
9438 DURING/train/DURING_00710
9438 GROWING/train/GROWING_00211
9438 MOMENT/train/MOMENT_00589
9438 PRISON/test/PRISON_00028
9438 CUSTOMERS/train/CUSTOMERS_00839
9438 LEGAL/train/LEGAL_00685
9438 HUNDREDS/train/HUNDREDS_00323
9438 MEMBER/train/MEMBER_00159
9438 WANTED/train/WANTED_00946
9438 LARGE/train/LARGE_00583
9438 MURDER/train/MURDER_00355
9438 ATTACKS/train/ATTACKS_00665
9438 ASKING/train/ASKING_00733
9438 CONFLICT/train/CONFLICT_00540
9438 TRIAL/train/TRIAL_00185
9438 ALLOWED/train/ALLOWED_00757
9438 MAKES/train/MAKES_00486
9438 JAMES/train/JAMES_00233
9438 PARTS/train/PARTS_00767
9438 JAMES/train/JAMES_00254
9438 GOVERNMENT/train/GOVERNMENT_00807
9438 MILLIONS/train/MILLIONS_00947
9438 DESPITE/train/DESPITE_00460
9438 ALLOWED/train/ALLOWED_00670
9438 JAMES/train/JAMES_00160
9438 ACCUSED/train/ACCUSED_00506
9438 SPENT/train/SPENT_00496
9438 AFRICA/train/AFRICA_00054
9438 RIGHT/train/RIGHT_00946
9438 JAMES/train/JAMES_00008
9438 VIOLENCE/train/VIOLENCE_00536
9438 GUILTY/train/GUILTY_00185
9438 SERIES/train/SERIES_00072
9438 THOSE/train/THOSE_00790
9438 REPORT/train/REPORT_00104
9438 FORWARD/train/FORWARD_00056
9438 FIGURES/train/FIGURES_00025
9438 MINISTERS/train/MINISTERS_00356
9438 WORST/train/WORST_00389
9438 WORKERS/train/WORKERS_00403
9438 DURING/train/DURING_00354
9438 DEATH/train/DEATH_00932
9438 GERMANY/train/GERMANY_00577
9438 THREAT/train/THREAT_00130
9438 GOING/train/GOING_00489
9438 PRIVATE/train/PRIVATE_00466
9438 JAMES/train/JAMES_00502
9438 WANTED/train/WANTED_00736
9438 BETWEEN/train/BETWEEN_00155
9438 SPEECH/train/SPEECH_00682
9438 THIRD/train/THIRD_00664
9438 STREET/train/STREET_00371
9438 SERVICE/train/SERVICE_00046
9438 ABUSE/train/ABUSE_00737
9438 PLANS/train/PLANS_00348
9438 WEEKEND/train/WEEKEND_00304
9438 STRONG/train/STRONG_00423
9438 AGREE/train/AGREE_00726
9438 PRESS/train/PRESS_00787
9438 COMES/train/COMES_00460
9438 CHIEF/train/CHIEF_00749
9438 EXPECTED/train/EXPECTED_00726
9438 WELCOME/train/WELCOME_00501
9438 VIOLENCE/train/VIOLENCE_00588
9438 TODAY/train/TODAY_00128
9438 MASSIVE/train/MASSIVE_00095
9438 PLACE/train/PLACE_00883
9438 POLITICIANS/train/POLITICIANS_00989
9438 PARLIAMENT/train/PARLIAMENT_00002
9438 STATEMENT/train/STATEMENT_00147
9438 UNION/train/UNION_00929
9438 INTEREST/train/INTEREST_00079
9438 JAMES/train/JAMES_00623
9438 FOOTBALL/train/FOOTBALL_00445
9438 BEFORE/train/BEFORE_00877
9438 ALLEGATIONS/train/ALLEGATIONS_00868
9438 WORST/train/WORST_00479
9438 WITHOUT/train/WITHOUT_00814
9438 INDEPENDENT/train/INDEPENDENT_00813
9438 FIGURES/train/FIGURES_00719
9438 STARTED/train/STARTED_00580
9438 YESTERDAY/train/YESTERDAY_00718
9438 WARNING/train/WARNING_00277
9438 DURING/train/DURING_00181
9438 DEATH/train/DEATH_00945
9438 FAMILY/train/FAMILY_00862
9438 MURDER/train/MURDER_00029
9438 HAVING/train/HAVING_00901
9438 MURDER/train/MURDER_00598
9438 UNDER/train/UNDER_00809
9438 REPORT/train/REPORT_00389
9438 SERIES/train/SERIES_00841
9438 OFFICERS/train/OFFICERS_00299
9438 STREET/train/STREET_00659
9438 FORWARD/train/FORWARD_00213
9438 COUPLE/train/COUPLE_00147
9438 IMMIGRATION/train/IMMIGRATION_00135
9438 CAPITAL/train/CAPITAL_00241
9438 STAFF/train/STAFF_00572
9438 CAPITAL/train/CAPITAL_00244
9438 PRESIDENT/train/PRESIDENT_00914
9438 POWERS/train/POWERS_00194
9438 COMPANY/train/COMPANY_00018
9438 AMONG/train/AMONG_00243
9438 WHILE/train/WHILE_00531
9438 THOUSANDS/train/THOUSANDS_00339
9438 WEEKS/train/WEEKS_00882
9438 COMPANIES/train/COMPANIES_00004
9438 CASES/train/CASES_00785
9438 PLACES/train/PLACES_00345
9438 CHARGE/train/CHARGE_00315
9438 MASSIVE/train/MASSIVE_00376
9438 MASSIVE/train/MASSIVE_00611
9438 DAVID/train/DAVID_00718
9438 ACCORDING/train/ACCORDING_00269
9438 CURRENT/train/CURRENT_00316
9438 TONIGHT/train/TONIGHT_00235
9438 THREE/train/THREE_00582
9438 FINANCIAL/train/FINANCIAL_00580
9438 BETWEEN/val/BETWEEN_00011
9438 MILLION/train/MILLION_00038
9438 STREET/train/STREET_00155
9438 COMPANY/train/COMPANY_00510
9438 HOSPITAL/train/HOSPITAL_00334
9438 SCHOOL/train/SCHOOL_00070
9438 ASKING/train/ASKING_00854
9438 STORY/train/STORY_00143
9438 FORMER/train/FORMER_00059
9438 EUROPEAN/train/EUROPEAN_00756
9438 SPEECH/train/SPEECH_00827
9438 CHARGE/train/CHARGE_00796
9438 ECONOMY/train/ECONOMY_00133
9438 FINANCIAL/train/FINANCIAL_00613
9438 START/train/START_00736
9438 GAMES/train/GAMES_00072
9438 INFLATION/test/INFLATION_00004
9438 LIKELY/train/LIKELY_00741
9438 IMMIGRATION/train/IMMIGRATION_00796
9438 CONCERNS/train/CONCERNS_00470
9438 YESTERDAY/train/YESTERDAY_00288
9438 SOUTH/train/SOUTH_00188
9438 GIVEN/train/GIVEN_00589
9438 WALES/train/WALES_00388
9438 KILLED/train/KILLED_00805
9438 REFERENDUM/train/REFERENDUM_00022
9438 SPECIAL/train/SPECIAL_00498
9438 INDEPENDENT/train/INDEPENDENT_00363
9438 TONIGHT/train/TONIGHT_00597
9438 EDUCATION/train/EDUCATION_00644
9438 CRIME/train/CRIME_00334
9438 LEADERS/train/LEADERS_00774
9438 SPENT/train/SPENT_00195
9438 MONTH/train/MONTH_00257
9438 STAFF/train/STAFF_00625
9438 JAMES/train/JAMES_00287
9438 SINGLE/train/SINGLE_00752
9438 INVESTMENT/train/INVESTMENT_00443
9438 SOUTH/train/SOUTH_00363
9438 WHILE/train/WHILE_00821
9438 HEART/train/HEART_00751
9438 WINDS/train/WINDS_00885
9438 SHOULD/train/SHOULD_00132
9438 TAKING/train/TAKING_00103
9438 LIVING/train/LIVING_00116
9438 SOCIETY/train/SOCIETY_00626
9438 REPORTS/train/REPORTS_00185
9438 UNION/train/UNION_00349
9438 THROUGH/train/THROUGH_00116
9438 AMOUNT/train/AMOUNT_00632
9438 MASSIVE/train/MASSIVE_00381
9438 REALLY/train/REALLY_00951
9438 SOUTH/train/SOUTH_00296
9438 NUMBERS/test/NUMBERS_00005
9438 FIRST/train/FIRST_00402
9438 CLAIMS/train/CLAIMS_00686
9438 WELCOME/train/WELCOME_00112
9438 SENIOR/train/SENIOR_00516
9438 STAND/train/STAND_00821
9438 AMONG/train/AMONG_00375
9438 ECONOMIC/train/ECONOMIC_00591
9438 GROWTH/train/GROWTH_00924
9438 SOUTH/train/SOUTH_00183
9438 GUILTY/train/GUILTY_00324
9438 EXPECTED/train/EXPECTED_00823
9438 FOOTBALL/train/FOOTBALL_00797
9438 HOSPITAL/train/HOSPITAL_00172
9438 CAPITAL/train/CAPITAL_00638
9438 WALES/train/WALES_00898
9438 INVOLVED/train/INVOLVED_00914
9438 CLAIMS/train/CLAIMS_00449
9438 MEETING/train/MEETING_00946
9438 FOLLOWING/train/FOLLOWING_00854
9438 ACROSS/train/ACROSS_00997
9438 VIOLENCE/train/VIOLENCE_00810
9438 BILLION/train/BILLION_00648
9438 INTEREST/train/INTEREST_00428
9438 ECONOMIC/train/ECONOMIC_00335
9438 COMMUNITY/train/COMMUNITY_00028
9438 GEORGE/train/GEORGE_00456
9438 ATTACK/train/ATTACK_00682
9438 DEBATE/train/DEBATE_00948
9438 SERIES/train/SERIES_00267
9438 OTHERS/train/OTHERS_00353
9438 THOUSANDS/train/THOUSANDS_00976
9438 MEDICAL/train/MEDICAL_00794
9438 TONIGHT/train/TONIGHT_00181
9438 PLACE/train/PLACE_00045
9438 POLITICAL/train/POLITICAL_00590
9438 MANCHESTER/train/MANCHESTER_00171
9438 FIRST/train/FIRST_00010
9438 USING/train/USING_00872
9438 OFFICE/train/OFFICE_00059
9438 DEFICIT/train/DEFICIT_00620
9438 STATEMENT/test/STATEMENT_00020
9438 BRITAIN/train/BRITAIN_00509
9438 JAMES/train/JAMES_00391
9438 PLANS/train/PLANS_00261
9438 COULD/train/COULD_00265
9438 MAKES/train/MAKES_00834
9438 FORMER/train/FORMER_00393
9438 QUESTIONS/train/QUESTIONS_00816
9438 CAMPAIGN/train/CAMPAIGN_00007
9438 RIGHTS/train/RIGHTS_00668
9438 EXPECTED/train/EXPECTED_00713
9438 WESTMINSTER/train/WESTMINSTER_00352
9438 MINISTER/train/MINISTER_00075
9438 AMONG/train/AMONG_00342
9438 PARTS/train/PARTS_00204
9438 POSSIBLE/train/POSSIBLE_00897
9438 BUDGET/train/BUDGET_00159
9438 SECOND/train/SECOND_00476
9438 WEATHER/train/WEATHER_00047
9438 CHANCE/train/CHANCE_00306
9438 GROUND/train/GROUND_00263
9438 FIGURES/train/FIGURES_00994
9438 BRITAIN/train/BRITAIN_00093
9438 FOREIGN/train/FOREIGN_00198
9438 PHONE/train/PHONE_00905
9438 BENEFITS/train/BENEFITS_00973
9438 LABOUR/train/LABOUR_00353
9438 LEVEL/train/LEVEL_00600
9438 MONTH/train/MONTH_00427
9438 COMPANY/train/COMPANY_00345
9438 BORDER/train/BORDER_00425
9438 LATEST/train/LATEST_00019
9438 DIFFERENCE/train/DIFFERENCE_00834
9438 BILLION/train/BILLION_00514
9438 AHEAD/train/AHEAD_00733
9438 MASSIVE/train/MASSIVE_00237
9438 SCHOOLS/train/SCHOOLS_00112
9438 CHANCE/train/CHANCE_00826
9438 NORTHERN/train/NORTHERN_00567
9438 HOUSING/train/HOUSING_00396
9438 FIRST/train/FIRST_00932
9438 POLITICIANS/train/POLITICIANS_00119
9438 SECURITY/train/SECURITY_00510
9438 BILLION/train/BILLION_00745
9438 SERVICES/train/SERVICES_00765
9438 SENIOR/train/SENIOR_00680
9438 PLACE/train/PLACE_00591
9438 GAMES/train/GAMES_00784
9438 SCOTTISH/train/SCOTTISH_00802
9438 KILLED/train/KILLED_00158
9438 KILLED/train/KILLED_00301
9438 LIVING/train/LIVING_00174
9438 CRISIS/train/CRISIS_00073
9438 FAMILY/train/FAMILY_00025
9438 WOMEN/train/WOMEN_00058
9438 VIOLENCE/train/VIOLENCE_00575
9438 GIVING/train/GIVING_00683
9438 INQUIRY/train/INQUIRY_00257
9438 ALLEGATIONS/train/ALLEGATIONS_00780
9438 COUNCIL/train/COUNCIL_00793
9438 AFFECTED/train/AFFECTED_00342
9438 POINT/train/POINT_00618
9438 WITHIN/train/WITHIN_01000
9438 CENTRAL/train/CENTRAL_00563
9438 ENERGY/train/ENERGY_00915
9438 WEEKEND/train/WEEKEND_00479
9438 AMERICAN/train/AMERICAN_00599
9438 MURDER/train/MURDER_00991
9438 MAKING/train/MAKING_00420
9438 MANCHESTER/train/MANCHESTER_00007
9438 HUNDREDS/test/HUNDREDS_00013
9438 PRISON/train/PRISON_00839
9438 FRENCH/train/FRENCH_00671
9438 HOUSING/test/HOUSING_00025
9438 FIGURES/train/FIGURES_00640
9438 POLITICAL/train/POLITICAL_00351
9438 THREAT/train/THREAT_00539
9438 UNTIL/train/UNTIL_00011
9438 REPORTS/train/REPORTS_00868
9438 PRICES/train/PRICES_00987
9438 MISSING/train/MISSING_00091
9438 PRESIDENT/train/PRESIDENT_00114
9438 SCOTLAND/test/SCOTLAND_00036
9438 LEVEL/train/LEVEL_00044
9438 KILLED/train/KILLED_00673
9438 CLOSE/train/CLOSE_00605
9438 OFFICERS/train/OFFICERS_00348
9438 ASKED/train/ASKED_00660
9438 STAND/train/STAND_00946
9438 GAMES/train/GAMES_00341
9438 RESPONSE/train/RESPONSE_00024
9438 LARGE/train/LARGE_00059
9438 FORMER/train/FORMER_00937
9438 EDITOR/train/EDITOR_00666
9438 INQUIRY/train/INQUIRY_00703
9438 ECONOMY/train/ECONOMY_00780
9438 BIGGEST/train/BIGGEST_00383
9438 ACCUSED/train/ACCUSED_00362
9438 SECRETARY/train/SECRETARY_00725
9438 UNITED/train/UNITED_00973
9438 ISSUE/train/ISSUE_00330
9438 SUNDAY/train/SUNDAY_00612
9438 BEFORE/train/BEFORE_00955
9438 DAVID/train/DAVID_00680
9438 SECRETARY/train/SECRETARY_00863
9438 HISTORY/train/HISTORY_00652
9438 FRONT/train/FRONT_00980
9438 SPENT/train/SPENT_00486
9438 SPEECH/train/SPEECH_00953
9438 THOUSANDS/train/THOUSANDS_00897
9438 ABUSE/train/ABUSE_00467
9438 WESTMINSTER/train/WESTMINSTER_00528
9438 STREET/train/STREET_00745
9438 AMONG/train/AMONG_00332
9438 CAMERON/train/CAMERON_00778
9438 JAMES/train/JAMES_00745
9438 EXPECTED/train/EXPECTED_00664
9438 HOSPITAL/train/HOSPITAL_00151
9438 CONFLICT/train/CONFLICT_00080
9438 AMERICAN/train/AMERICAN_00543
9438 HAVING/train/HAVING_00118
9438 STREET/train/STREET_00837
9438 ECONOMIC/train/ECONOMIC_00036
9438 LOOKING/train/LOOKING_00383
9438 REPORTS/train/REPORTS_00735
9438 WATER/train/WATER_00102
9438 ACCUSED/train/ACCUSED_00842
9438 REPORTS/train/REPORTS_00140
9438 BETWEEN/train/BETWEEN_00269
9438 SERVICES/train/SERVICES_00560
9438 CLAIMS/train/CLAIMS_00052
9438 POLITICAL/train/POLITICAL_00471
9438 SPENT/train/SPENT_00357
9438 EXPECT/train/EXPECT_00978
9438 WHILE/train/WHILE_00131
9438 COMPANY/train/COMPANY_00871
9438 GIVEN/train/GIVEN_00592
9438 SOCIAL/train/SOCIAL_00518
9438 POWER/train/POWER_00037
9438 SOUTH/train/SOUTH_00486
9438 CONSERVATIVE/train/CONSERVATIVE_00043
9438 EVENING/train/EVENING_00630
9438 ELECTION/train/ELECTION_00731
9438 AGAINST/train/AGAINST_00181
9438 BRITISH/train/BRITISH_00320
9438 UNTIL/train/UNTIL_00058
9438 WESTMINSTER/train/WESTMINSTER_00708
9438 FIGURES/train/FIGURES_00106
9438 OFFICERS/train/OFFICERS_00740
9438 CHIEF/train/CHIEF_00796
9438 KILLED/train/KILLED_00190
9438 DECISION/train/DECISION_00021
9438 ACCESS/train/ACCESS_00588
9438 PLACES/train/PLACES_00044
9438 LEGAL/train/LEGAL_00288
9438 UNDER/train/UNDER_00650
9438 OPPOSITION/train/OPPOSITION_00047
9438 WORST/train/WORST_00634
9438 TOMORROW/train/TOMORROW_00601
9438 HOSPITAL/train/HOSPITAL_00080
9438 BUILDING/train/BUILDING_00427
9438 TODAY/train/TODAY_00304
9438 FORMER/train/FORMER_00356
9438 CAMERON/train/CAMERON_00629
9438 REPORTS/train/REPORTS_00451
9438 RULES/train/RULES_00109
9438 AFFAIRS/train/AFFAIRS_00023
9438 CRIME/train/CRIME_00329
9438 GIVING/train/GIVING_00103
9438 ACCORDING/train/ACCORDING_00432
9438 COURT/train/COURT_00988
9438 PARENTS/train/PARENTS_00353
9438 COUNTRIES/train/COUNTRIES_00083
9438 MANCHESTER/train/MANCHESTER_00292
9438 HUNDREDS/train/HUNDREDS_00615
9438 TOMORROW/test/TOMORROW_00039
9438 MONTHS/train/MONTHS_00751
9438 LATEST/train/LATEST_00624
9438 MEMBER/train/MEMBER_00019
9438 ANNOUNCED/train/ANNOUNCED_00771
9438 COMES/train/COMES_00601
9438 AMERICAN/train/AMERICAN_00618
9438 DESCRIBED/train/DESCRIBED_00583
9438 OBAMA/train/OBAMA_00229
9438 WORST/train/WORST_00687
9438 PLACE/train/PLACE_00184
9438 MURDER/train/MURDER_00067
9438 EVENING/train/EVENING_00622
9438 JAMES/train/JAMES_00795
9438 MIGRANTS/train/MIGRANTS_00670
9438 ECONOMIC/train/ECONOMIC_00945
9438 WELCOME/train/WELCOME_00431
9438 LEAVE/test/LEAVE_00020
9438 SINCE/test/SINCE_00035
9438 INQUIRY/train/INQUIRY_00450
9438 TODAY/train/TODAY_00012
9438 PERSONAL/train/PERSONAL_00565
9438 SYRIAN/train/SYRIAN_00607
9438 SECTOR/train/SECTOR_00989
9438 WARNING/train/WARNING_00851
9438 ECONOMIC/train/ECONOMIC_00260
9438 OTHER/train/OTHER_00669
9438 JAMES/test/JAMES_00024
9438 PERSONAL/train/PERSONAL_00178
9438 STARTED/train/STARTED_00883
9438 STAFF/train/STAFF_00123
9438 CANCER/train/CANCER_00190
9438 PERSONAL/train/PERSONAL_00324
9438 TONIGHT/train/TONIGHT_00544
9438 SOCIETY/train/SOCIETY_00860
9438 POWER/train/POWER_00795
9438 CHANGES/train/CHANGES_00035
9438 BEHIND/train/BEHIND_00983
9438 ACROSS/train/ACROSS_00140
9438 CASES/train/CASES_00141
9438 ARRESTED/train/ARRESTED_00333
9438 BORDER/train/BORDER_00433
9438 HUNDREDS/train/HUNDREDS_00004
9438 GEORGE/train/GEORGE_00928
9438 BEING/train/BEING_00491
9438 DIFFERENT/test/DIFFERENT_00048
9438 CHIEF/train/CHIEF_00545
9438 SPEAKING/train/SPEAKING_00536
9438 AFRICA/train/AFRICA_00211
9438 FOREIGN/train/FOREIGN_00304
9438 HISTORY/train/HISTORY_00854
9438 TRYING/train/TRYING_00977
9438 SUNDAY/train/SUNDAY_00816
9438 WORKERS/train/WORKERS_00745
9438 TRIAL/train/TRIAL_00267
9438 FOREIGN/train/FOREIGN_00138
9438 TONIGHT/train/TONIGHT_00187
9438 FOUND/train/FOUND_00262
9438 LOCAL/train/LOCAL_00166
9438 EARLY/train/EARLY_00929
9438 STATE/train/STATE_00839
9438 AFFAIRS/train/AFFAIRS_00163
9438 FIGURES/train/FIGURES_00413
9438 ATTACK/train/ATTACK_00596
9438 WESTERN/train/WESTERN_00149
9438 CHANGE/train/CHANGE_00145
9438 MEANS/train/MEANS_00791
9438 THOUGHT/train/THOUGHT_00653
9438 KILLED/train/KILLED_00165
9438 FRENCH/train/FRENCH_00207
9438 CONSERVATIVE/train/CONSERVATIVE_00870
9438 MINISTER/train/MINISTER_00706
9438 PLANS/train/PLANS_00236
9438 LATER/train/LATER_00582
9438 PROBLEMS/train/PROBLEMS_00210
9438 MESSAGE/train/MESSAGE_00272
9438 NEEDS/train/NEEDS_00777
9438 WORST/train/WORST_00060
9438 TIMES/train/TIMES_00218
9438 REPORT/train/REPORT_00860
9438 WELCOME/train/WELCOME_00959
9438 NEEDS/train/NEEDS_00541
9438 TRIAL/train/TRIAL_00505
9438 PRESS/train/PRESS_00177
9438 TRADE/train/TRADE_00795
9438 MEASURES/train/MEASURES_00843
9438 YEARS/train/YEARS_00213
9438 TRUST/train/TRUST_00337
9438 LEAST/train/LEAST_00244
9438 REPORTS/train/REPORTS_00417
9438 JAMES/train/JAMES_00435
9438 FACING/train/FACING_00919
9438 CLOSE/train/CLOSE_00833
9438 MILLIONS/train/MILLIONS_00485
9438 KILLED/train/KILLED_01000
9438 CANCER/train/CANCER_00556
9438 BENEFITS/train/BENEFITS_00111
9438 EVENTS/train/EVENTS_00646
9438 GOVERNMENT/train/GOVERNMENT_00365
9438 PAYING/train/PAYING_00237
9438 NUMBERS/train/NUMBERS_00971
9438 FOLLOWING/train/FOLLOWING_00905
9438 OFFICE/train/OFFICE_00132
9438 GROWTH/train/GROWTH_00239
9438 UNITED/train/UNITED_00574
9438 RESULT/train/RESULT_00253
9438 ALMOST/train/ALMOST_00044
9438 THREE/train/THREE_00910
9438 TONIGHT/train/TONIGHT_00586
9438 ASKING/train/ASKING_00762
9438 FINAL/train/FINAL_00161
9438 VICTIMS/train/VICTIMS_00156
9438 OPPOSITION/train/OPPOSITION_00740
9438 SYSTEM/train/SYSTEM_00696
9438 CHANGES/train/CHANGES_00418
9438 BANKS/train/BANKS_00691
9438 ASKING/train/ASKING_00736
9438 SYSTEM/test/SYSTEM_00049
9438 ACCESS/train/ACCESS_00551
9438 CASES/train/CASES_00396
9438 ASKING/test/ASKING_00043
9438 ITSELF/train/ITSELF_00201
9438 INQUIRY/train/INQUIRY_00378
9438 DETAILS/train/DETAILS_00169
9438 DESPITE/train/DESPITE_00257
9438 TRADE/train/TRADE_00039
9438 GLOBAL/train/GLOBAL_00320
9438 STAFF/train/STAFF_00321
9438 FRIDAY/train/FRIDAY_00437
9438 ACCUSED/train/ACCUSED_00209
9438 PATIENTS/train/PATIENTS_00536
9438 BRITAIN/train/BRITAIN_00656
9438 WALES/test/WALES_00013
9438 LONDON/train/LONDON_00685
9438 TONIGHT/train/TONIGHT_00016
9438 PRICE/train/PRICE_00606
9438 OFFICERS/train/OFFICERS_00547
9438 TRIAL/train/TRIAL_00938
9438 STATEMENT/train/STATEMENT_00527
9438 STAND/train/STAND_00854
9438 TONIGHT/train/TONIGHT_00014
9438 MAJORITY/train/MAJORITY_00173
9438 GROWING/train/GROWING_00017
9438 EDITOR/train/EDITOR_00996
9438 IMPORTANT/train/IMPORTANT_00275
9438 WELCOME/train/WELCOME_00508
9438 CAPITAL/train/CAPITAL_00722
9438 DEFICIT/train/DEFICIT_00169
9438 PARTIES/train/PARTIES_00091
9438 MEASURES/train/MEASURES_00480
9438 STAFF/test/STAFF_00028
9438 STORY/train/STORY_00794
9438 HIGHER/train/HIGHER_00218
9438 COURT/train/COURT_00968
9438 CUSTOMERS/test/CUSTOMERS_00048
9438 POWERS/train/POWERS_00890
9438 STORY/train/STORY_00150
9438 PARENTS/train/PARENTS_00843
9438 MEANS/train/MEANS_00799
9438 ARRESTED/train/ARRESTED_00434
9438 STATES/train/STATES_00880
9438 EVERYTHING/train/EVERYTHING_00679
9438 ACCESS/train/ACCESS_00257
9438 THIRD/train/THIRD_00291
9438 WELCOME/train/WELCOME_00932
9438 TONIGHT/train/TONIGHT_00527
9438 PRISON/test/PRISON_00031
9438 SECOND/train/SECOND_00147
9438 PRESIDENT/train/PRESIDENT_00807
9438 HUNDREDS/train/HUNDREDS_00089
9438 ARRESTED/train/ARRESTED_00779
9438 PRIME/train/PRIME_00849
9438 BUILD/train/BUILD_00379
9438 MEETING/train/MEETING_00645
9438 GROUP/train/GROUP_00351
9438 EVENTS/train/EVENTS_00678
9438 EUROPEAN/train/EUROPEAN_00085
9438 SCOTLAND/train/SCOTLAND_00950
9438 ALLOW/train/ALLOW_00083
9438 EDITOR/train/EDITOR_00805
9438 GROWING/train/GROWING_00524
9438 OFFICE/train/OFFICE_00001
9438 COURT/train/COURT_00995
9438 GENERAL/train/GENERAL_00157
9438 LONDON/train/LONDON_00879
9438 FAMILY/train/FAMILY_00299
9438 SERIOUS/train/SERIOUS_00653
9438 SYSTEM/train/SYSTEM_00945
9438 GUILTY/train/GUILTY_00275
9438 JUSTICE/train/JUSTICE_00036
9438 HEART/train/HEART_00799
9438 FINAL/train/FINAL_00888
9438 HEALTH/train/HEALTH_00822
9438 GERMANY/train/GERMANY_00282
9438 CRIME/train/CRIME_00720
9438 CONTINUE/train/CONTINUE_00878
9438 HUMAN/train/HUMAN_00057
9438 FINANCIAL/train/FINANCIAL_00134
9438 LOCAL/train/LOCAL_00886
9438 ACCORDING/train/ACCORDING_00053
9438 BIGGEST/train/BIGGEST_00780
9438 RIGHTS/train/RIGHTS_00003
9438 SCHOOLS/train/SCHOOLS_00049
9438 KNOWN/train/KNOWN_00154
9438 CAMPAIGN/train/CAMPAIGN_00788
9438 BECOME/train/BECOME_00936
9438 DETAILS/train/DETAILS_00278
9438 KNOWN/train/KNOWN_00365
9438 ABUSE/train/ABUSE_00736
9438 CHARGE/train/CHARGE_00644
9438 AFFAIRS/train/AFFAIRS_00330
9438 SCHOOL/train/SCHOOL_00875
9438 BUSINESS/train/BUSINESS_00449
9438 THOUSANDS/test/THOUSANDS_00013
9438 YEARS/train/YEARS_00446
9438 BUSINESS/train/BUSINESS_00251
9438 FRENCH/train/FRENCH_00362
9438 COUPLE/train/COUPLE_00758
9438 PAYING/train/PAYING_00376
9438 GUILTY/train/GUILTY_00244
9438 BUILD/train/BUILD_00005
9438 REFERENDUM/train/REFERENDUM_00363
9438 PARTS/train/PARTS_00161
9438 FORMER/train/FORMER_00507
9438 CONCERNS/train/CONCERNS_00029
9438 SERIES/train/SERIES_00507
9438 REPORTS/train/REPORTS_00123
9438 SIMPLY/test/SIMPLY_00016
9438 VICTIMS/train/VICTIMS_00846
9438 POWERS/train/POWERS_00070
9438 SYRIAN/test/SYRIAN_00018
9438 EARLY/train/EARLY_00867
9438 ACCORDING/train/ACCORDING_00926
9438 ACCORDING/train/ACCORDING_00471
9438 LEVEL/train/LEVEL_00777
9438 ANSWER/train/ANSWER_00215
9438 SPEECH/train/SPEECH_00335
9438 COURT/train/COURT_00921
9438 RIGHTS/train/RIGHTS_00281
9438 CONSERVATIVE/train/CONSERVATIVE_00909
9438 CRISIS/train/CRISIS_00413
9438 ANNOUNCED/train/ANNOUNCED_00020
9438 FINAL/train/FINAL_00825
9438 IMMIGRATION/train/IMMIGRATION_00243
9438 FUTURE/train/FUTURE_00502
9438 LEGAL/test/LEGAL_00018
9438 AHEAD/train/AHEAD_00901
9438 REPORTS/train/REPORTS_00974
9438 COMES/train/COMES_00784
9438 OPERATION/train/OPERATION_00739
9438 SINCE/train/SINCE_00504
9438 POLITICS/test/POLITICS_00015
9438 LEGAL/train/LEGAL_00790
9438 ATTACK/train/ATTACK_00598
9438 WELFARE/train/WELFARE_00845
9438 WHICH/train/WHICH_00375
9438 PLANS/train/PLANS_00734
9438 WESTMINSTER/test/WESTMINSTER_00042
9438 WHILE/train/WHILE_00594
9438 POWER/train/POWER_00731
9438 PRICES/train/PRICES_00296
9438 JAMES/train/JAMES_00478
9438 STATEMENT/train/STATEMENT_00420
9438 SCOTTISH/train/SCOTTISH_00453
9438 LEVELS/train/LEVELS_00389
9438 YEARS/train/YEARS_00252
9438 FORMER/train/FORMER_00501
9438 STREET/train/STREET_00183
9438 CRIME/train/CRIME_00345
9438 PLANS/train/PLANS_00291
9438 TONIGHT/train/TONIGHT_00027
9438 CAMERON/train/CAMERON_00984
9438 LABOUR/train/LABOUR_00394
9438 PRISON/train/PRISON_00608
9438 AFRICA/train/AFRICA_00722
9438 GROWING/train/GROWING_00430
9438 JUDGE/train/JUDGE_00767
9438 FORCE/train/FORCE_00867
9438 BUDGET/train/BUDGET_00092
9438 INQUIRY/train/INQUIRY_00097
9438 COMPANY/train/COMPANY_00673
9438 HAPPENED/train/HAPPENED_00170
9438 SENIOR/train/SENIOR_00625
9438 MILLION/train/MILLION_00113
9438 FAMILIES/train/FAMILIES_00464
9438 FOOTBALL/train/FOOTBALL_00340
9438 CHILDREN/train/CHILDREN_00198
9438 FOUND/train/FOUND_00073
9438 EVENTS/train/EVENTS_00463
9438 CHILDREN/train/CHILDREN_00671
9438 LEVELS/train/LEVELS_00107
9438 SYRIAN/train/SYRIAN_00157
9438 SCOTTISH/train/SCOTTISH_00100
9438 RATES/train/RATES_00865
9438 ACCUSED/train/ACCUSED_00223
9438 BROUGHT/train/BROUGHT_00122
9438 SENIOR/train/SENIOR_00699
9438 TRIAL/train/TRIAL_00688
9438 SOCIAL/train/SOCIAL_00936
9438 ACCORDING/train/ACCORDING_00966
9438 LEGAL/train/LEGAL_00190
9438 YEARS/train/YEARS_00370
9438 CLAIMS/train/CLAIMS_00156
9438 BANKS/train/BANKS_00162
9438 LOOKING/train/LOOKING_00079
9438 MEASURES/train/MEASURES_00417
9438 CONCERNS/train/CONCERNS_00440
9438 CHILD/train/CHILD_00415
9438 AGAIN/train/AGAIN_00285
9438 YESTERDAY/train/YESTERDAY_00741
9438 PARTY/train/PARTY_00096
9438 HEART/train/HEART_00856
9438 SPEND/train/SPEND_00527
9438 STAFF/train/STAFF_00282
9438 THIRD/train/THIRD_00132
9438 MONEY/train/MONEY_00736
9438 GOING/train/GOING_00114
9438 WHILE/train/WHILE_00248
9438 WEAPONS/train/WEAPONS_00984
9438 LONDON/train/LONDON_00818
9438 CRISIS/train/CRISIS_00076
9438 FOUND/train/FOUND_00465
9438 THEIR/train/THEIR_00759
9438 WITHOUT/train/WITHOUT_00721
9438 CALLED/train/CALLED_00578
9438 BEING/train/BEING_00472
9438 FRANCE/train/FRANCE_00616
9438 DEATH/train/DEATH_00862
9438 MANCHESTER/train/MANCHESTER_00913
9438 LIKELY/train/LIKELY_00722
9438 REPORTS/train/REPORTS_00872
9438 CRIME/train/CRIME_00969
9438 HIGHER/train/HIGHER_00303
9438 SECRETARY/train/SECRETARY_00004
9438 ACCUSED/train/ACCUSED_00009
9438 WELCOME/train/WELCOME_00079
9438 REPORT/train/REPORT_00637
9438 MAYBE/train/MAYBE_00919
9438 INQUIRY/train/INQUIRY_00324
9438 STATES/train/STATES_00658
9438 BANKS/train/BANKS_00154
9438 MONTH/train/MONTH_00782
9438 EDUCATION/train/EDUCATION_00092
9438 MONTHS/train/MONTHS_00529
9438 SECRETARY/train/SECRETARY_00103
9438 SEVEN/train/SEVEN_00451
9438 HAVING/train/HAVING_00354
9438 PRICES/train/PRICES_00655
9438 ALLEGATIONS/train/ALLEGATIONS_00676
9438 ANNOUNCED/train/ANNOUNCED_00505
9438 MEASURES/train/MEASURES_00743
9438 FORMER/train/FORMER_00859
9438 GIVEN/test/GIVEN_00031
9438 RATES/train/RATES_00560
9438 COURT/train/COURT_00800
9438 EDITOR/train/EDITOR_00014
9438 ALREADY/train/ALREADY_00099
9438 FIGURES/train/FIGURES_00857
9438 ANOTHER/train/ANOTHER_00643
9438 SINCE/train/SINCE_00723
9438 PRESIDENT/train/PRESIDENT_00102
9438 REPORT/train/REPORT_00755
9438 BUDGET/train/BUDGET_00568
9438 INFLATION/test/INFLATION_00041
9438 GAMES/train/GAMES_00054
9438 CAPITAL/train/CAPITAL_00331
9438 DURING/train/DURING_00024
9438 FIGURES/train/FIGURES_00648
9438 PRIVATE/train/PRIVATE_00273
9438 WRONG/train/WRONG_00095
9438 SCHOOLS/train/SCHOOLS_00954
9438 THREAT/train/THREAT_00620
9438 BRING/train/BRING_00819
9438 EDITOR/train/EDITOR_00035
9438 ENGLAND/train/ENGLAND_00756
9438 JUSTICE/train/JUSTICE_00750
9438 SPEAKING/train/SPEAKING_00305
9438 PLANS/train/PLANS_00848
9438 FORMER/train/FORMER_00228
9438 MAJOR/test/MAJOR_00009
9438 GROWTH/train/GROWTH_00386
9438 INDEPENDENT/train/INDEPENDENT_00879
9438 FRIDAY/train/FRIDAY_00485
9438 ALLEGATIONS/train/ALLEGATIONS_00958
9438 LEAVE/train/LEAVE_00176
9438 PRIVATE/train/PRIVATE_00012
9438 BEFORE/train/BEFORE_00278
9438 FINAL/train/FINAL_00896
9438 MILLIONS/train/MILLIONS_00903
9438 PARENTS/train/PARENTS_00506
9438 SIDES/train/SIDES_00294
9438 GUILTY/train/GUILTY_00615
9438 CONFLICT/train/CONFLICT_00903
9438 ALLEGATIONS/train/ALLEGATIONS_00816
9438 PRICE/train/PRICE_00607
9438 ACTION/test/ACTION_00027
9438 AFTER/train/AFTER_00276
9438 THOUSANDS/train/THOUSANDS_00752
9438 TOWARDS/train/TOWARDS_00843
9438 FUTURE/train/FUTURE_00547
9438 ABUSE/train/ABUSE_00786
9438 SYSTEM/train/SYSTEM_00893
9438 HISTORY/train/HISTORY_00800
9438 WEEKS/train/WEEKS_00112
9438 HISTORY/train/HISTORY_00715
9438 SPECIAL/train/SPECIAL_00581
9438 AGREE/train/AGREE_00279
9438 PLANS/test/PLANS_00038
9438 LATEST/train/LATEST_00989
9438 LEADERS/train/LEADERS_00977
9438 CONFERENCE/train/CONFERENCE_00815
9438 ASKING/test/ASKING_00044
9438 UNTIL/train/UNTIL_00697
9438 GUILTY/train/GUILTY_00636
9438 WORLD/train/WORLD_00195
9438 OBAMA/train/OBAMA_00826
9438 EUROPE/train/EUROPE_00819
9438 EVENING/train/EVENING_00879
9438 THOUGHT/train/THOUGHT_00147
9438 CLAIMS/train/CLAIMS_00435
9438 MEDICAL/train/MEDICAL_00706
9438 CONTINUE/train/CONTINUE_00919
9438 MAJOR/train/MAJOR_00140
9438 CRIME/train/CRIME_00225
9438 EVENING/train/EVENING_00925
9438 VIOLENCE/train/VIOLENCE_00925
9438 SECRETARY/test/SECRETARY_00008
9438 CHIEF/train/CHIEF_00430
9438 MEMBERS/train/MEMBERS_00602
9438 COMPANY/train/COMPANY_00270
9438 PROBABLY/train/PROBABLY_00339
9438 MEMBERS/train/MEMBERS_00572
9438 VICTIMS/train/VICTIMS_00378
9438 CHARGES/train/CHARGES_00469
9438 PRIVATE/train/PRIVATE_00797
9438 HOURS/train/HOURS_00457
9438 CAMERON/train/CAMERON_00563
9438 WORKERS/train/WORKERS_00725
9438 CANNOT/train/CANNOT_00375
9438 GEORGE/train/GEORGE_00985
9438 SOCIAL/train/SOCIAL_00467
9438 MEMBERS/train/MEMBERS_00250
9438 SUPPORT/train/SUPPORT_00550
9438 LATER/train/LATER_00483
9438 INCREASE/train/INCREASE_00189
9438 PHONE/train/PHONE_00074
9438 TONIGHT/train/TONIGHT_00787
9438 GROWTH/train/GROWTH_00763
9438 SEVERAL/train/SEVERAL_00569
9438 OPERATION/train/OPERATION_00670
9438 EXPECTED/train/EXPECTED_00039
9438 SINCE/train/SINCE_00462
9438 LABOUR/val/LABOUR_00021
9438 REPORTS/train/REPORTS_00242
9438 SECOND/train/SECOND_00327
9438 RATHER/train/RATHER_00193
9438 CHINA/train/CHINA_00604
9438 ARRESTED/train/ARRESTED_00454
9438 QUESTIONS/train/QUESTIONS_00644
9438 GLOBAL/train/GLOBAL_00115
9438 FRENCH/train/FRENCH_00624
9438 TONIGHT/train/TONIGHT_00018
9438 VIOLENCE/train/VIOLENCE_00033
9438 AGREEMENT/val/AGREEMENT_00032
9438 WAITING/train/WAITING_00247
9438 CHILD/train/CHILD_00110
9438 LATEST/train/LATEST_00375
9438 DEFICIT/train/DEFICIT_00160
9438 MANCHESTER/val/MANCHESTER_00024
9438 MINUTES/train/MINUTES_00327
9438 MONEY/test/MONEY_00013
9438 FIGURES/train/FIGURES_00966
9438 DEATH/train/DEATH_00065
9438 SPEAKING/train/SPEAKING_00588
9438 VOTERS/train/VOTERS_00084
9438 INFORMATION/train/INFORMATION_00006
9438 TOWARDS/train/TOWARDS_00520
9438 ACROSS/train/ACROSS_00181
9438 COURT/train/COURT_00557
9438 ARRESTED/train/ARRESTED_00831
9438 INDEPENDENT/train/INDEPENDENT_00043
9438 OFFICIALS/train/OFFICIALS_00637
9438 AMERICAN/train/AMERICAN_00290
9438 MONTH/train/MONTH_00130
9438 INDUSTRY/train/INDUSTRY_00834
9438 REPORT/train/REPORT_00208
9438 EXACTLY/train/EXACTLY_00016
9438 KNOWN/train/KNOWN_00231
9438 COUNTRY/train/COUNTRY_00366
9438 WHILE/train/WHILE_00783
9438 MEETING/test/MEETING_00008
9438 DESCRIBED/train/DESCRIBED_00208
9438 WATCHING/train/WATCHING_00551
9438 ATTACK/train/ATTACK_00807
9438 DOING/train/DOING_00789
9438 AFFAIRS/train/AFFAIRS_00751
9438 PLANS/train/PLANS_00035
9438 MOMENT/train/MOMENT_00749
9438 GEORGE/train/GEORGE_00493
9438 AHEAD/train/AHEAD_00779
9438 SERVICES/train/SERVICES_00530
9438 JAMES/train/JAMES_00726
9438 PROBABLY/train/PROBABLY_00094
9438 ABUSE/train/ABUSE_00429
9438 MAKING/train/MAKING_00282
9438 CHARGES/train/CHARGES_00619
9438 TONIGHT/train/TONIGHT_00839
9438 BIGGEST/train/BIGGEST_00254
9438 LEADER/train/LEADER_00052
9438 AMERICAN/train/AMERICAN_00310
9438 ANNOUNCED/train/ANNOUNCED_00635
9438 HISTORY/train/HISTORY_00672
9438 BENEFIT/train/BENEFIT_00306
9438 CLOSE/train/CLOSE_00150
9438 MURDER/train/MURDER_00866
9438 PLANS/train/PLANS_00412
9438 ALLEGATIONS/train/ALLEGATIONS_00856
9438 WELFARE/train/WELFARE_00872
9438 MANCHESTER/train/MANCHESTER_00048
9438 SPEAKING/val/SPEAKING_00014
9438 COULD/train/COULD_00570
9438 EMERGENCY/train/EMERGENCY_00175
9438 RECENT/train/RECENT_00683
9438 UNITED/train/UNITED_00309
9438 BLACK/test/BLACK_00041
9438 AFFECTED/train/AFFECTED_00732
9438 JAMES/train/JAMES_00514
9438 THOUGHT/train/THOUGHT_00642
9438 CAPITAL/train/CAPITAL_00246
9438 SOCIETY/train/SOCIETY_00450
9438 ATTACK/train/ATTACK_00209
9438 NORTH/train/NORTH_00209
9438 WORKERS/train/WORKERS_00832
9438 HUNDREDS/train/HUNDREDS_00499
9438 MINISTERS/train/MINISTERS_00737
9438 BRITISH/train/BRITISH_00353
9438 JAMES/train/JAMES_00546
9438 STATEMENT/train/STATEMENT_00904
9438 MEDIA/train/MEDIA_00275
9438 SEVEN/train/SEVEN_00132
9438 AMOUNT/train/AMOUNT_00376
9438 WORST/train/WORST_00638
9438 BENEFIT/train/BENEFIT_00897
9438 JAMES/train/JAMES_00718
9438 FACING/train/FACING_00914
9438 AMONG/train/AMONG_00894
9438 CHINA/test/CHINA_00030
9438 OUTSIDE/train/OUTSIDE_00166
9438 WARNING/train/WARNING_00473
9438 GROUP/train/GROUP_00212
9438 AHEAD/train/AHEAD_00691
9438 ALMOST/train/ALMOST_00721
9438 MISSING/train/MISSING_00187
9438 OFFICERS/train/OFFICERS_00389
9438 EXTRA/train/EXTRA_00302
9438 SECTOR/train/SECTOR_00178
9438 STORY/train/STORY_00686
9438 JAMES/train/JAMES_00694
9438 DURING/train/DURING_00476
9438 LATER/train/LATER_00290
9438 DESPITE/train/DESPITE_00845
9438 ANNOUNCED/train/ANNOUNCED_00466
9438 FORWARD/train/FORWARD_00431
9438 EUROPEAN/train/EUROPEAN_00713
9438 DIFFERENT/train/DIFFERENT_00206
9438 BRITISH/train/BRITISH_00708
9438 SAYING/train/SAYING_00480
9438 LEVELS/train/LEVELS_00459
9438 QUESTION/train/QUESTION_00320
9438 ACTION/train/ACTION_00988
9438 SCHOOLS/train/SCHOOLS_00461
9438 FORCE/train/FORCE_00201
9438 WATER/train/WATER_00952
9438 MILLION/train/MILLION_00162
9438 QUESTIONS/train/QUESTIONS_00995
9438 HOSPITAL/train/HOSPITAL_00961
9438 INQUIRY/train/INQUIRY_00429
9438 ENERGY/train/ENERGY_00580
9438 DIFFERENT/train/DIFFERENT_00505
[truncated: 572,632 more chars]
