# Supplementary material
Source: ML conference proceedings conference paper supplement (https://www.ecva.net/papers/eccv_2022/papers_ECCV/html/136960445_ECCV_2022_paper.php)
Supplement: Supplementary file 1 [file 136960445-supp.zip › LRW_train.txt]

0 ABOUT/test/ABOUT_00020
0 ABOUT/test/ABOUT_00045
0 ABOUT/train/ABOUT_00034
0 ABOUT/train/ABOUT_00082
0 ABOUT/train/ABOUT_00120
0 ABOUT/train/ABOUT_00123
0 ABOUT/train/ABOUT_00162
0 ABOUT/train/ABOUT_00246
0 ABOUT/train/ABOUT_00280
0 ABOUT/train/ABOUT_00371
0 ABOUT/train/ABOUT_00429
0 ABOUT/train/ABOUT_00518
0 ABOUT/train/ABOUT_00544
0 ABOUT/train/ABOUT_00590
0 ABOUT/train/ABOUT_00706
0 ABOUT/train/ABOUT_00778
0 ABOUT/train/ABOUT_00781
0 ABOUT/train/ABOUT_00995
0 ABOUT/val/ABOUT_00024
0 ABSOLUTELY/train/ABSOLUTELY_00298
0 ABUSE/test/ABUSE_00001
0 ABUSE/test/ABUSE_00036
0 ABUSE/test/ABUSE_00039
0 ABUSE/train/ABUSE_00017
0 ABUSE/train/ABUSE_00024
0 ABUSE/train/ABUSE_00026
0 ABUSE/train/ABUSE_00029
0 ABUSE/train/ABUSE_00049
0 ABUSE/train/ABUSE_00094
0 ABUSE/train/ABUSE_00108
0 ABUSE/train/ABUSE_00112
0 ABUSE/train/ABUSE_00113
0 ABUSE/train/ABUSE_00128
0 ABUSE/train/ABUSE_00178
0 ABUSE/train/ABUSE_00194
0 ABUSE/train/ABUSE_00227
0 ABUSE/train/ABUSE_00238
0 ABUSE/train/ABUSE_00245
0 ABUSE/train/ABUSE_00253
0 ABUSE/train/ABUSE_00254
0 ABUSE/train/ABUSE_00269
0 ABUSE/train/ABUSE_00276
0 ABUSE/train/ABUSE_00281
0 ABUSE/train/ABUSE_00318
0 ABUSE/train/ABUSE_00320
0 ABUSE/train/ABUSE_00329
0 ABUSE/train/ABUSE_00331
0 ABUSE/train/ABUSE_00342
0 ABUSE/train/ABUSE_00350
0 ABUSE/train/ABUSE_00358
0 ABUSE/train/ABUSE_00386
0 ABUSE/train/ABUSE_00390
0 ABUSE/train/ABUSE_00413
0 ABUSE/train/ABUSE_00441
0 ABUSE/train/ABUSE_00453
0 ABUSE/train/ABUSE_00465
0 ABUSE/train/ABUSE_00472
0 ABUSE/train/ABUSE_00476
0 ABUSE/train/ABUSE_00548
0 ABUSE/train/ABUSE_00591
0 ABUSE/train/ABUSE_00635
0 ABUSE/train/ABUSE_00664
0 ABUSE/train/ABUSE_00668
0 ABUSE/train/ABUSE_00683
0 ABUSE/train/ABUSE_00687
0 ABUSE/train/ABUSE_00697
0 ABUSE/train/ABUSE_00709
0 ABUSE/train/ABUSE_00714
0 ABUSE/train/ABUSE_00729
0 ABUSE/train/ABUSE_00740
0 ABUSE/train/ABUSE_00763
0 ABUSE/train/ABUSE_00770
0 ABUSE/train/ABUSE_00793
0 ABUSE/train/ABUSE_00795
0 ABUSE/train/ABUSE_00797
0 ABUSE/train/ABUSE_00803
0 ABUSE/train/ABUSE_00821
0 ABUSE/train/ABUSE_00824
0 ABUSE/train/ABUSE_00828
0 ABUSE/train/ABUSE_00833
0 ABUSE/train/ABUSE_00888
0 ABUSE/train/ABUSE_00897
0 ABUSE/train/ABUSE_00910
0 ABUSE/train/ABUSE_00925
0 ABUSE/train/ABUSE_00926
0 ABUSE/train/ABUSE_00937
0 ABUSE/train/ABUSE_00948
0 ABUSE/val/ABUSE_00022
0 ABUSE/val/ABUSE_00047
0 ACCESS/test/ACCESS_00003
0 ACCESS/test/ACCESS_00013
0 ACCESS/test/ACCESS_00025
0 ACCESS/test/ACCESS_00039
0 ACCESS/train/ACCESS_00009
0 ACCESS/train/ACCESS_00010
0 ACCESS/train/ACCESS_00059
0 ACCESS/train/ACCESS_00078
0 ACCESS/train/ACCESS_00090
0 ACCESS/train/ACCESS_00111
0 ACCESS/train/ACCESS_00114
0 ACCESS/train/ACCESS_00117
0 ACCESS/train/ACCESS_00168
0 ACCESS/train/ACCESS_00211
0 ACCESS/train/ACCESS_00234
0 ACCESS/train/ACCESS_00300
0 ACCESS/train/ACCESS_00317
0 ACCESS/train/ACCESS_00337
0 ACCESS/train/ACCESS_00348
0 ACCESS/train/ACCESS_00363
0 ACCESS/train/ACCESS_00366
0 ACCESS/train/ACCESS_00447
0 ACCESS/train/ACCESS_00457
0 ACCESS/train/ACCESS_00487
0 ACCESS/train/ACCESS_00562
0 ACCESS/train/ACCESS_00616
0 ACCESS/train/ACCESS_00620
0 ACCESS/train/ACCESS_00627
0 ACCESS/train/ACCESS_00693
0 ACCESS/train/ACCESS_00728
0 ACCESS/train/ACCESS_00729
0 ACCESS/train/ACCESS_00747
0 ACCESS/train/ACCESS_00795
0 ACCESS/train/ACCESS_00811
0 ACCESS/train/ACCESS_00822
0 ACCESS/train/ACCESS_00851
0 ACCESS/train/ACCESS_00861
0 ACCESS/train/ACCESS_00879
0 ACCESS/train/ACCESS_00929
0 ACCESS/train/ACCESS_00941
0 ACCESS/train/ACCESS_00943
0 ACCESS/train/ACCESS_00956
0 ACCESS/val/ACCESS_00050
0 ACCORDING/test/ACCORDING_00011
0 ACCORDING/test/ACCORDING_00043
0 ACCORDING/train/ACCORDING_00002
0 ACCORDING/train/ACCORDING_00006
0 ACCORDING/train/ACCORDING_00009
0 ACCORDING/train/ACCORDING_00031
0 ACCORDING/train/ACCORDING_00043
0 ACCORDING/train/ACCORDING_00050
0 ACCORDING/train/ACCORDING_00051
0 ACCORDING/train/ACCORDING_00059
0 ACCORDING/train/ACCORDING_00080
0 ACCORDING/train/ACCORDING_00090
0 ACCORDING/train/ACCORDING_00096
0 ACCORDING/train/ACCORDING_00112
0 ACCORDING/train/ACCORDING_00115
0 ACCORDING/train/ACCORDING_00124
0 ACCORDING/train/ACCORDING_00129
0 ACCORDING/train/ACCORDING_00130
0 ACCORDING/train/ACCORDING_00158
0 ACCORDING/train/ACCORDING_00174
0 ACCORDING/train/ACCORDING_00197
0 ACCORDING/train/ACCORDING_00219
0 ACCORDING/train/ACCORDING_00223
0 ACCORDING/train/ACCORDING_00226
0 ACCORDING/train/ACCORDING_00228
0 ACCORDING/train/ACCORDING_00247
0 ACCORDING/train/ACCORDING_00254
0 ACCORDING/train/ACCORDING_00257
0 ACCORDING/train/ACCORDING_00262
0 ACCORDING/train/ACCORDING_00272
0 ACCORDING/train/ACCORDING_00289
0 ACCORDING/train/ACCORDING_00302
0 ACCORDING/train/ACCORDING_00303
0 ACCORDING/train/ACCORDING_00327
0 ACCORDING/train/ACCORDING_00333
0 ACCORDING/train/ACCORDING_00339
0 ACCORDING/train/ACCORDING_00359
0 ACCORDING/train/ACCORDING_00361
0 ACCORDING/train/ACCORDING_00362
0 ACCORDING/train/ACCORDING_00378
0 ACCORDING/train/ACCORDING_00380
0 ACCORDING/train/ACCORDING_00382
0 ACCORDING/train/ACCORDING_00387
0 ACCORDING/train/ACCORDING_00388
0 ACCORDING/train/ACCORDING_00394
0 ACCORDING/train/ACCORDING_00395
0 ACCORDING/train/ACCORDING_00404
0 ACCORDING/train/ACCORDING_00414
0 ACCORDING/train/ACCORDING_00433
0 ACCORDING/train/ACCORDING_00436
0 ACCORDING/train/ACCORDING_00437
0 ACCORDING/train/ACCORDING_00451
0 ACCORDING/train/ACCORDING_00457
0 ACCORDING/train/ACCORDING_00474
0 ACCORDING/train/ACCORDING_00475
0 ACCORDING/train/ACCORDING_00477
0 ACCORDING/train/ACCORDING_00484
0 ACCORDING/train/ACCORDING_00486
0 ACCORDING/train/ACCORDING_00522
0 ACCORDING/train/ACCORDING_00527
0 ACCORDING/train/ACCORDING_00528
0 ACCORDING/train/ACCORDING_00542
0 ACCORDING/train/ACCORDING_00558
0 ACCORDING/train/ACCORDING_00564
0 ACCORDING/train/ACCORDING_00571
0 ACCORDING/train/ACCORDING_00576
0 ACCORDING/train/ACCORDING_00582
0 ACCORDING/train/ACCORDING_00596
0 ACCORDING/train/ACCORDING_00615
0 ACCORDING/train/ACCORDING_00616
0 ACCORDING/train/ACCORDING_00624
0 ACCORDING/train/ACCORDING_00625
0 ACCORDING/train/ACCORDING_00629
0 ACCORDING/train/ACCORDING_00635
0 ACCORDING/train/ACCORDING_00637
0 ACCORDING/train/ACCORDING_00644
0 ACCORDING/train/ACCORDING_00645
0 ACCORDING/train/ACCORDING_00657
0 ACCORDING/train/ACCORDING_00658
0 ACCORDING/train/ACCORDING_00680
0 ACCORDING/train/ACCORDING_00698
0 ACCORDING/train/ACCORDING_00713
0 ACCORDING/train/ACCORDING_00721
0 ACCORDING/train/ACCORDING_00726
0 ACCORDING/train/ACCORDING_00769
0 ACCORDING/train/ACCORDING_00771
0 ACCORDING/train/ACCORDING_00776
0 ACCORDING/train/ACCORDING_00783
0 ACCORDING/train/ACCORDING_00785
0 ACCORDING/train/ACCORDING_00788
0 ACCORDING/train/ACCORDING_00790
0 ACCORDING/train/ACCORDING_00791
0 ACCORDING/train/ACCORDING_00799
0 ACCORDING/train/ACCORDING_00829
0 ACCORDING/train/ACCORDING_00833
0 ACCORDING/train/ACCORDING_00845
0 ACCORDING/train/ACCORDING_00850
0 ACCORDING/train/ACCORDING_00856
0 ACCORDING/train/ACCORDING_00861
0 ACCORDING/train/ACCORDING_00869
0 ACCORDING/train/ACCORDING_00875
0 ACCORDING/train/ACCORDING_00887
0 ACCORDING/train/ACCORDING_00894
0 ACCORDING/train/ACCORDING_00922
0 ACCORDING/train/ACCORDING_00941
0 ACCORDING/train/ACCORDING_00949
0 ACCORDING/train/ACCORDING_00953
0 ACCORDING/train/ACCORDING_00961
0 ACCORDING/train/ACCORDING_00989
0 ACCORDING/train/ACCORDING_00992
0 ACCORDING/val/ACCORDING_00002
0 ACCORDING/val/ACCORDING_00007
0 ACCORDING/val/ACCORDING_00018
0 ACCORDING/val/ACCORDING_00020
0 ACCORDING/val/ACCORDING_00025
0 ACCUSED/test/ACCUSED_00012
0 ACCUSED/test/ACCUSED_00016
0 ACCUSED/test/ACCUSED_00022
0 ACCUSED/test/ACCUSED_00029
0 ACCUSED/test/ACCUSED_00050
0 ACCUSED/train/ACCUSED_00001
0 ACCUSED/train/ACCUSED_00006
0 ACCUSED/train/ACCUSED_00011
0 ACCUSED/train/ACCUSED_00022
0 ACCUSED/train/ACCUSED_00026
0 ACCUSED/train/ACCUSED_00029
0 ACCUSED/train/ACCUSED_00035
0 ACCUSED/train/ACCUSED_00036
0 ACCUSED/train/ACCUSED_00057
0 ACCUSED/train/ACCUSED_00061
0 ACCUSED/train/ACCUSED_00064
0 ACCUSED/train/ACCUSED_00069
0 ACCUSED/train/ACCUSED_00078
0 ACCUSED/train/ACCUSED_00082
0 ACCUSED/train/ACCUSED_00086
0 ACCUSED/train/ACCUSED_00103
0 ACCUSED/train/ACCUSED_00109
0 ACCUSED/train/ACCUSED_00122
0 ACCUSED/train/ACCUSED_00123
0 ACCUSED/train/ACCUSED_00129
0 ACCUSED/train/ACCUSED_00141
0 ACCUSED/train/ACCUSED_00145
0 ACCUSED/train/ACCUSED_00164
0 ACCUSED/train/ACCUSED_00167
0 ACCUSED/train/ACCUSED_00171
0 ACCUSED/train/ACCUSED_00182
0 ACCUSED/train/ACCUSED_00183
0 ACCUSED/train/ACCUSED_00186
0 ACCUSED/train/ACCUSED_00187
0 ACCUSED/train/ACCUSED_00212
0 ACCUSED/train/ACCUSED_00214
0 ACCUSED/train/ACCUSED_00230
0 ACCUSED/train/ACCUSED_00259
0 ACCUSED/train/ACCUSED_00260
0 ACCUSED/train/ACCUSED_00261
0 ACCUSED/train/ACCUSED_00263
0 ACCUSED/train/ACCUSED_00267
0 ACCUSED/train/ACCUSED_00272
0 ACCUSED/train/ACCUSED_00281
0 ACCUSED/train/ACCUSED_00284
0 ACCUSED/train/ACCUSED_00292
0 ACCUSED/train/ACCUSED_00307
0 ACCUSED/train/ACCUSED_00316
0 ACCUSED/train/ACCUSED_00342
0 ACCUSED/train/ACCUSED_00346
0 ACCUSED/train/ACCUSED_00350
0 ACCUSED/train/ACCUSED_00355
0 ACCUSED/train/ACCUSED_00358
0 ACCUSED/train/ACCUSED_00366
0 ACCUSED/train/ACCUSED_00380
0 ACCUSED/train/ACCUSED_00398
0 ACCUSED/train/ACCUSED_00405
0 ACCUSED/train/ACCUSED_00416
0 ACCUSED/train/ACCUSED_00422
0 ACCUSED/train/ACCUSED_00427
0 ACCUSED/train/ACCUSED_00428
0 ACCUSED/train/ACCUSED_00430
0 ACCUSED/train/ACCUSED_00433
0 ACCUSED/train/ACCUSED_00436
0 ACCUSED/train/ACCUSED_00439
0 ACCUSED/train/ACCUSED_00442
0 ACCUSED/train/ACCUSED_00458
0 ACCUSED/train/ACCUSED_00459
0 ACCUSED/train/ACCUSED_00460
0 ACCUSED/train/ACCUSED_00465
0 ACCUSED/train/ACCUSED_00483
0 ACCUSED/train/ACCUSED_00485
0 ACCUSED/train/ACCUSED_00503
0 ACCUSED/train/ACCUSED_00519
0 ACCUSED/train/ACCUSED_00531
0 ACCUSED/train/ACCUSED_00542
0 ACCUSED/train/ACCUSED_00544
0 ACCUSED/train/ACCUSED_00551
0 ACCUSED/train/ACCUSED_00554
0 ACCUSED/train/ACCUSED_00556
0 ACCUSED/train/ACCUSED_00573
0 ACCUSED/train/ACCUSED_00580
0 ACCUSED/train/ACCUSED_00592
0 ACCUSED/train/ACCUSED_00601
0 ACCUSED/train/ACCUSED_00630
0 ACCUSED/train/ACCUSED_00643
0 ACCUSED/train/ACCUSED_00669
0 ACCUSED/train/ACCUSED_00687
0 ACCUSED/train/ACCUSED_00688
0 ACCUSED/train/ACCUSED_00690
0 ACCUSED/train/ACCUSED_00694
0 ACCUSED/train/ACCUSED_00696
0 ACCUSED/train/ACCUSED_00699
0 ACCUSED/train/ACCUSED_00707
0 ACCUSED/train/ACCUSED_00710
0 ACCUSED/train/ACCUSED_00712
0 ACCUSED/train/ACCUSED_00721
0 ACCUSED/train/ACCUSED_00722
0 ACCUSED/train/ACCUSED_00738
0 ACCUSED/train/ACCUSED_00741
0 ACCUSED/train/ACCUSED_00745
0 ACCUSED/train/ACCUSED_00755
0 ACCUSED/train/ACCUSED_00757
0 ACCUSED/train/ACCUSED_00764
0 ACCUSED/train/ACCUSED_00767
0 ACCUSED/train/ACCUSED_00774
0 ACCUSED/train/ACCUSED_00780
0 ACCUSED/train/ACCUSED_00783
0 ACCUSED/train/ACCUSED_00790
0 ACCUSED/train/ACCUSED_00793
0 ACCUSED/train/ACCUSED_00794
0 ACCUSED/train/ACCUSED_00798
0 ACCUSED/train/ACCUSED_00810
0 ACCUSED/train/ACCUSED_00813
0 ACCUSED/train/ACCUSED_00831
0 ACCUSED/train/ACCUSED_00832
0 ACCUSED/train/ACCUSED_00859
0 ACCUSED/train/ACCUSED_00868
0 ACCUSED/train/ACCUSED_00870
0 ACCUSED/train/ACCUSED_00880
0 ACCUSED/train/ACCUSED_00891
0 ACCUSED/train/ACCUSED_00896
0 ACCUSED/train/ACCUSED_00901
0 ACCUSED/train/ACCUSED_00920
0 ACCUSED/train/ACCUSED_00921
0 ACCUSED/train/ACCUSED_00925
0 ACCUSED/train/ACCUSED_00935
0 ACCUSED/train/ACCUSED_00939
0 ACCUSED/train/ACCUSED_00945
0 ACCUSED/train/ACCUSED_00951
0 ACCUSED/train/ACCUSED_00952
0 ACCUSED/train/ACCUSED_00954
0 ACCUSED/train/ACCUSED_00968
0 ACCUSED/train/ACCUSED_00974
0 ACCUSED/train/ACCUSED_00978
0 ACCUSED/train/ACCUSED_00985
0 ACCUSED/train/ACCUSED_00988
0 ACCUSED/train/ACCUSED_00995
0 ACCUSED/train/ACCUSED_00996
0 ACCUSED/val/ACCUSED_00020
0 ACCUSED/val/ACCUSED_00028
0 ACCUSED/val/ACCUSED_00029
0 ACCUSED/val/ACCUSED_00031
0 ACROSS/test/ACROSS_00023
0 ACROSS/train/ACROSS_00091
0 ACROSS/train/ACROSS_00150
0 ACROSS/train/ACROSS_00216
0 ACROSS/train/ACROSS_00262
0 ACROSS/train/ACROSS_00286
0 ACROSS/train/ACROSS_00294
0 ACROSS/train/ACROSS_00558
0 ACROSS/train/ACROSS_00569
0 ACROSS/train/ACROSS_00585
0 ACROSS/train/ACROSS_00640
0 ACROSS/train/ACROSS_00767
0 ACROSS/train/ACROSS_00828
0 ACROSS/train/ACROSS_00841
0 ACROSS/train/ACROSS_00849
0 ACROSS/train/ACROSS_00938
0 ACROSS/train/ACROSS_01000
0 ACTION/train/ACTION_00046
0 ACTION/train/ACTION_00049
0 ACTION/train/ACTION_00074
0 ACTION/train/ACTION_00084
0 ACTION/train/ACTION_00105
0 ACTION/train/ACTION_00129
0 ACTION/train/ACTION_00150
0 ACTION/train/ACTION_00151
0 ACTION/train/ACTION_00165
0 ACTION/train/ACTION_00217
0 ACTION/train/ACTION_00221
0 ACTION/train/ACTION_00232
0 ACTION/train/ACTION_00283
0 ACTION/train/ACTION_00286
0 ACTION/train/ACTION_00301
0 ACTION/train/ACTION_00344
0 ACTION/train/ACTION_00353
0 ACTION/train/ACTION_00357
0 ACTION/train/ACTION_00376
0 ACTION/train/ACTION_00405
0 ACTION/train/ACTION_00443
0 ACTION/train/ACTION_00484
0 ACTION/train/ACTION_00486
0 ACTION/train/ACTION_00502
0 ACTION/train/ACTION_00516
0 ACTION/train/ACTION_00518
0 ACTION/train/ACTION_00548
0 ACTION/train/ACTION_00551
0 ACTION/train/ACTION_00633
0 ACTION/train/ACTION_00639
0 ACTION/train/ACTION_00651
0 ACTION/train/ACTION_00665
0 ACTION/train/ACTION_00672
0 ACTION/train/ACTION_00676
0 ACTION/train/ACTION_00687
0 ACTION/train/ACTION_00692
0 ACTION/train/ACTION_00756
0 ACTION/train/ACTION_00760
0 ACTION/train/ACTION_00794
0 ACTION/train/ACTION_00801
0 ACTION/train/ACTION_00806
0 ACTION/train/ACTION_00817
0 ACTION/train/ACTION_00819
0 ACTION/train/ACTION_00856
0 ACTION/train/ACTION_00860
0 ACTION/train/ACTION_00862
0 ACTION/train/ACTION_00867
0 ACTION/train/ACTION_00883
0 ACTION/train/ACTION_00897
0 ACTION/train/ACTION_00909
0 ACTION/train/ACTION_00928
0 ACTION/train/ACTION_00937
0 ACTION/train/ACTION_00976
0 ACTION/train/ACTION_00981
0 ACTION/train/ACTION_00997
0 ACTION/val/ACTION_00022
0 ACTION/val/ACTION_00023
0 ACTION/val/ACTION_00037
0 ACTUALLY/train/ACTUALLY_00891
0 AFFAIRS/test/AFFAIRS_00015
0 AFFAIRS/test/AFFAIRS_00023
0 AFFAIRS/test/AFFAIRS_00031
0 AFFAIRS/test/AFFAIRS_00048
0 AFFAIRS/train/AFFAIRS_00028
0 AFFAIRS/train/AFFAIRS_00038
0 AFFAIRS/train/AFFAIRS_00042
0 AFFAIRS/train/AFFAIRS_00049
0 AFFAIRS/train/AFFAIRS_00058
0 AFFAIRS/train/AFFAIRS_00065
0 AFFAIRS/train/AFFAIRS_00072
0 AFFAIRS/train/AFFAIRS_00073
0 AFFAIRS/train/AFFAIRS_00079
0 AFFAIRS/train/AFFAIRS_00088
0 AFFAIRS/train/AFFAIRS_00091
0 AFFAIRS/train/AFFAIRS_00100
0 AFFAIRS/train/AFFAIRS_00107
0 AFFAIRS/train/AFFAIRS_00111
0 AFFAIRS/train/AFFAIRS_00116
0 AFFAIRS/train/AFFAIRS_00141
0 AFFAIRS/train/AFFAIRS_00153
0 AFFAIRS/train/AFFAIRS_00166
0 AFFAIRS/train/AFFAIRS_00177
0 AFFAIRS/train/AFFAIRS_00181
0 AFFAIRS/train/AFFAIRS_00188
0 AFFAIRS/train/AFFAIRS_00190
0 AFFAIRS/train/AFFAIRS_00205
0 AFFAIRS/train/AFFAIRS_00221
0 AFFAIRS/train/AFFAIRS_00224
0 AFFAIRS/train/AFFAIRS_00227
0 AFFAIRS/train/AFFAIRS_00241
0 AFFAIRS/train/AFFAIRS_00249
0 AFFAIRS/train/AFFAIRS_00255
0 AFFAIRS/train/AFFAIRS_00256
0 AFFAIRS/train/AFFAIRS_00259
0 AFFAIRS/train/AFFAIRS_00265
0 AFFAIRS/train/AFFAIRS_00270
0 AFFAIRS/train/AFFAIRS_00278
0 AFFAIRS/train/AFFAIRS_00300
0 AFFAIRS/train/AFFAIRS_00308
0 AFFAIRS/train/AFFAIRS_00349
0 AFFAIRS/train/AFFAIRS_00350
0 AFFAIRS/train/AFFAIRS_00370
0 AFFAIRS/train/AFFAIRS_00422
0 AFFAIRS/train/AFFAIRS_00429
0 AFFAIRS/train/AFFAIRS_00454
0 AFFAIRS/train/AFFAIRS_00472
0 AFFAIRS/train/AFFAIRS_00474
0 AFFAIRS/train/AFFAIRS_00485
0 AFFAIRS/train/AFFAIRS_00495
0 AFFAIRS/train/AFFAIRS_00502
0 AFFAIRS/train/AFFAIRS_00504
0 AFFAIRS/train/AFFAIRS_00508
0 AFFAIRS/train/AFFAIRS_00510
0 AFFAIRS/train/AFFAIRS_00548
0 AFFAIRS/train/AFFAIRS_00552
0 AFFAIRS/train/AFFAIRS_00559
0 AFFAIRS/train/AFFAIRS_00568
0 AFFAIRS/train/AFFAIRS_00576
0 AFFAIRS/train/AFFAIRS_00600
0 AFFAIRS/train/AFFAIRS_00605
0 AFFAIRS/train/AFFAIRS_00611
0 AFFAIRS/train/AFFAIRS_00639
0 AFFAIRS/train/AFFAIRS_00655
0 AFFAIRS/train/AFFAIRS_00656
0 AFFAIRS/train/AFFAIRS_00677
0 AFFAIRS/train/AFFAIRS_00691
0 AFFAIRS/train/AFFAIRS_00697
0 AFFAIRS/train/AFFAIRS_00702
0 AFFAIRS/train/AFFAIRS_00725
0 AFFAIRS/train/AFFAIRS_00738
0 AFFAIRS/train/AFFAIRS_00742
0 AFFAIRS/train/AFFAIRS_00746
0 AFFAIRS/train/AFFAIRS_00755
0 AFFAIRS/train/AFFAIRS_00763
0 AFFAIRS/train/AFFAIRS_00765
0 AFFAIRS/train/AFFAIRS_00781
0 AFFAIRS/train/AFFAIRS_00786
0 AFFAIRS/train/AFFAIRS_00795
0 AFFAIRS/train/AFFAIRS_00825
0 AFFAIRS/train/AFFAIRS_00847
0 AFFAIRS/train/AFFAIRS_00861
0 AFFAIRS/train/AFFAIRS_00864
0 AFFAIRS/train/AFFAIRS_00878
0 AFFAIRS/train/AFFAIRS_00886
0 AFFAIRS/train/AFFAIRS_00892
0 AFFAIRS/train/AFFAIRS_00899
0 AFFAIRS/train/AFFAIRS_00937
0 AFFAIRS/train/AFFAIRS_00942
0 AFFAIRS/val/AFFAIRS_00014
0 AFFAIRS/val/AFFAIRS_00017
0 AFFAIRS/val/AFFAIRS_00023
0 AFFAIRS/val/AFFAIRS_00028
0 AFFAIRS/val/AFFAIRS_00036
0 AFFAIRS/val/AFFAIRS_00045
0 AFFAIRS/val/AFFAIRS_00049
0 AFFECTED/test/AFFECTED_00003
0 AFFECTED/train/AFFECTED_00007
0 AFFECTED/train/AFFECTED_00014
0 AFFECTED/train/AFFECTED_00051
0 AFFECTED/train/AFFECTED_00054
0 AFFECTED/train/AFFECTED_00065
0 AFFECTED/train/AFFECTED_00085
0 AFFECTED/train/AFFECTED_00091
0 AFFECTED/train/AFFECTED_00134
0 AFFECTED/train/AFFECTED_00157
0 AFFECTED/train/AFFECTED_00171
0 AFFECTED/train/AFFECTED_00176
0 AFFECTED/train/AFFECTED_00186
0 AFFECTED/train/AFFECTED_00244
0 AFFECTED/train/AFFECTED_00253
0 AFFECTED/train/AFFECTED_00344
0 AFFECTED/train/AFFECTED_00362
0 AFFECTED/train/AFFECTED_00408
0 AFFECTED/train/AFFECTED_00419
0 AFFECTED/train/AFFECTED_00424
0 AFFECTED/train/AFFECTED_00438
0 AFFECTED/train/AFFECTED_00443
0 AFFECTED/train/AFFECTED_00445
0 AFFECTED/train/AFFECTED_00460
0 AFFECTED/train/AFFECTED_00465
0 AFFECTED/train/AFFECTED_00498
0 AFFECTED/train/AFFECTED_00523
0 AFFECTED/train/AFFECTED_00559
0 AFFECTED/train/AFFECTED_00599
0 AFFECTED/train/AFFECTED_00607
0 AFFECTED/train/AFFECTED_00614
0 AFFECTED/train/AFFECTED_00616
0 AFFECTED/train/AFFECTED_00637
0 AFFECTED/train/AFFECTED_00646
0 AFFECTED/train/AFFECTED_00647
0 AFFECTED/train/AFFECTED_00656
0 AFFECTED/train/AFFECTED_00660
0 AFFECTED/train/AFFECTED_00669
0 AFFECTED/train/AFFECTED_00673
0 AFFECTED/train/AFFECTED_00695
0 AFFECTED/train/AFFECTED_00706
0 AFFECTED/train/AFFECTED_00717
0 AFFECTED/train/AFFECTED_00725
0 AFFECTED/train/AFFECTED_00728
0 AFFECTED/train/AFFECTED_00771
0 AFFECTED/train/AFFECTED_00774
0 AFFECTED/train/AFFECTED_00779
0 AFFECTED/train/AFFECTED_00781
0 AFFECTED/train/AFFECTED_00807
0 AFFECTED/val/AFFECTED_00010
0 AFFECTED/val/AFFECTED_00026
0 AFFECTED/val/AFFECTED_00044
0 AFFECTED/val/AFFECTED_00048
0 AFRICA/test/AFRICA_00008
0 AFRICA/test/AFRICA_00024
0 AFRICA/train/AFRICA_00003
0 AFRICA/train/AFRICA_00037
0 AFRICA/train/AFRICA_00045
0 AFRICA/train/AFRICA_00050
0 AFRICA/train/AFRICA_00056
0 AFRICA/train/AFRICA_00077
0 AFRICA/train/AFRICA_00152
0 AFRICA/train/AFRICA_00167
0 AFRICA/train/AFRICA_00203
0 AFRICA/train/AFRICA_00210
0 AFRICA/train/AFRICA_00217
0 AFRICA/train/AFRICA_00234
0 AFRICA/train/AFRICA_00250
0 AFRICA/train/AFRICA_00263
0 AFRICA/train/AFRICA_00279
0 AFRICA/train/AFRICA_00305
0 AFRICA/train/AFRICA_00316
0 AFRICA/train/AFRICA_00352
0 AFRICA/train/AFRICA_00359
0 AFRICA/train/AFRICA_00423
0 AFRICA/train/AFRICA_00457
0 AFRICA/train/AFRICA_00469
0 AFRICA/train/AFRICA_00495
0 AFRICA/train/AFRICA_00500
0 AFRICA/train/AFRICA_00529
0 AFRICA/train/AFRICA_00539
0 AFRICA/train/AFRICA_00550
0 AFRICA/train/AFRICA_00551
0 AFRICA/train/AFRICA_00570
0 AFRICA/train/AFRICA_00596
0 AFRICA/train/AFRICA_00622
0 AFRICA/train/AFRICA_00632
0 AFRICA/train/AFRICA_00648
0 AFRICA/train/AFRICA_00698
0 AFRICA/train/AFRICA_00717
0 AFRICA/train/AFRICA_00723
0 AFRICA/train/AFRICA_00738
0 AFRICA/train/AFRICA_00746
0 AFRICA/train/AFRICA_00748
0 AFRICA/train/AFRICA_00762
0 AFRICA/train/AFRICA_00773
0 AFRICA/train/AFRICA_00822
0 AFRICA/train/AFRICA_00829
0 AFRICA/train/AFRICA_00853
0 AFRICA/train/AFRICA_00860
0 AFRICA/train/AFRICA_00871
0 AFRICA/train/AFRICA_00892
0 AFRICA/train/AFRICA_00896
0 AFRICA/train/AFRICA_00911
0 AFRICA/train/AFRICA_00915
0 AFRICA/train/AFRICA_00918
0 AFRICA/train/AFRICA_00957
0 AFRICA/train/AFRICA_00972
0 AFRICA/train/AFRICA_00975
0 AFRICA/train/AFRICA_00977
0 AFRICA/val/AFRICA_00006
0 AFRICA/val/AFRICA_00014
0 AFRICA/val/AFRICA_00024
0 AFRICA/val/AFRICA_00028
0 AFTERNOON/train/AFTERNOON_00393
0 AFTERNOON/train/AFTERNOON_00541
0 AFTERNOON/train/AFTERNOON_00612
0 AFTERNOON/train/AFTERNOON_00821
0 AFTERNOON/train/AFTERNOON_00947
0 AFTERNOON/train/AFTERNOON_00975
0 AFTER/test/AFTER_00021
0 AFTER/train/AFTER_00014
0 AFTER/train/AFTER_00068
0 AFTER/train/AFTER_00075
0 AFTER/train/AFTER_00084
0 AFTER/train/AFTER_00125
0 AFTER/train/AFTER_00139
0 AFTER/train/AFTER_00155
0 AFTER/train/AFTER_00172
0 AFTER/train/AFTER_00199
0 AFTER/train/AFTER_00227
0 AFTER/train/AFTER_00232
0 AFTER/train/AFTER_00233
0 AFTER/train/AFTER_00238
0 AFTER/train/AFTER_00240
0 AFTER/train/AFTER_00248
0 AFTER/train/AFTER_00253
0 AFTER/train/AFTER_00269
0 AFTER/train/AFTER_00329
0 AFTER/train/AFTER_00330
0 AFTER/train/AFTER_00355
0 AFTER/train/AFTER_00368
0 AFTER/train/AFTER_00397
0 AFTER/train/AFTER_00434
0 AFTER/train/AFTER_00497
0 AFTER/train/AFTER_00512
0 AFTER/train/AFTER_00514
0 AFTER/train/AFTER_00531
0 AFTER/train/AFTER_00537
0 AFTER/train/AFTER_00571
0 AFTER/train/AFTER_00585
0 AFTER/train/AFTER_00590
0 AFTER/train/AFTER_00607
0 AFTER/train/AFTER_00610
0 AFTER/train/AFTER_00638
0 AFTER/train/AFTER_00640
0 AFTER/train/AFTER_00644
0 AFTER/train/AFTER_00652
0 AFTER/train/AFTER_00655
0 AFTER/train/AFTER_00657
0 AFTER/train/AFTER_00674
0 AFTER/train/AFTER_00681
0 AFTER/train/AFTER_00710
0 AFTER/train/AFTER_00731
0 AFTER/train/AFTER_00782
0 AFTER/train/AFTER_00790
0 AFTER/train/AFTER_00798
0 AFTER/train/AFTER_00805
0 AFTER/train/AFTER_00806
0 AFTER/train/AFTER_00849
0 AFTER/train/AFTER_00874
0 AFTER/train/AFTER_00889
0 AFTER/train/AFTER_00891
0 AFTER/train/AFTER_00897
0 AFTER/train/AFTER_00906
0 AFTER/train/AFTER_00949
0 AFTER/train/AFTER_00961
0 AFTER/train/AFTER_00997
0 AFTER/val/AFTER_00015
0 AFTER/val/AFTER_00023
0 AFTER/val/AFTER_00026
0 AGAINST/test/AGAINST_00024
0 AGAINST/test/AGAINST_00040
0 AGAINST/train/AGAINST_00011
0 AGAINST/train/AGAINST_00038
0 AGAINST/train/AGAINST_00050
0 AGAINST/train/AGAINST_00064
0 AGAINST/train/AGAINST_00065
0 AGAINST/train/AGAINST_00074
0 AGAINST/train/AGAINST_00079
0 AGAINST/train/AGAINST_00095
0 AGAINST/train/AGAINST_00096
0 AGAINST/train/AGAINST_00121
0 AGAINST/train/AGAINST_00153
0 AGAINST/train/AGAINST_00205
0 AGAINST/train/AGAINST_00220
0 AGAINST/train/AGAINST_00248
0 AGAINST/train/AGAINST_00249
0 AGAINST/train/AGAINST_00259
0 AGAINST/train/AGAINST_00261
0 AGAINST/train/AGAINST_00313
0 AGAINST/train/AGAINST_00331
0 AGAINST/train/AGAINST_00337
0 AGAINST/train/AGAINST_00344
0 AGAINST/train/AGAINST_00354
0 AGAINST/train/AGAINST_00369
0 AGAINST/train/AGAINST_00425
0 AGAINST/train/AGAINST_00428
0 AGAINST/train/AGAINST_00461
0 AGAINST/train/AGAINST_00483
0 AGAINST/train/AGAINST_00506
0 AGAINST/train/AGAINST_00518
0 AGAINST/train/AGAINST_00554
0 AGAINST/train/AGAINST_00589
0 AGAINST/train/AGAINST_00662
0 AGAINST/train/AGAINST_00690
0 AGAINST/train/AGAINST_00697
0 AGAINST/train/AGAINST_00701
0 AGAINST/train/AGAINST_00722
0 AGAINST/train/AGAINST_00757
0 AGAINST/train/AGAINST_00759
0 AGAINST/train/AGAINST_00773
0 AGAINST/train/AGAINST_00783
0 AGAINST/train/AGAINST_00811
0 AGAINST/train/AGAINST_00838
0 AGAINST/train/AGAINST_00841
0 AGAINST/train/AGAINST_00848
0 AGAINST/train/AGAINST_00859
0 AGAINST/train/AGAINST_00869
0 AGAINST/train/AGAINST_00897
0 AGAINST/train/AGAINST_00922
0 AGAINST/train/AGAINST_00941
0 AGAINST/train/AGAINST_00942
0 AGAINST/train/AGAINST_00978
0 AGAINST/train/AGAINST_00986
0 AGAIN/test/AGAIN_00002
0 AGAIN/train/AGAIN_00046
0 AGAIN/train/AGAIN_00128
0 AGAIN/train/AGAIN_00150
0 AGAIN/train/AGAIN_00178
0 AGAIN/train/AGAIN_00198
0 AGAIN/train/AGAIN_00277
0 AGAIN/train/AGAIN_00382
0 AGAIN/train/AGAIN_00427
0 AGAIN/train/AGAIN_00437
0 AGAIN/train/AGAIN_00502
0 AGAIN/train/AGAIN_00556
0 AGAIN/train/AGAIN_00707
0 AGAIN/train/AGAIN_00727
0 AGAIN/train/AGAIN_00772
0 AGAIN/train/AGAIN_00883
0 AGAIN/train/AGAIN_00919
0 AGAIN/train/AGAIN_00955
0 AGREEMENT/train/AGREEMENT_00037
0 AGREEMENT/train/AGREEMENT_00047
0 AGREEMENT/train/AGREEMENT_00050
0 AGREEMENT/train/AGREEMENT_00113
0 AGREEMENT/train/AGREEMENT_00184
0 AGREEMENT/train/AGREEMENT_00213
0 AGREEMENT/train/AGREEMENT_00218
0 AGREEMENT/train/AGREEMENT_00252
0 AGREEMENT/train/AGREEMENT_00256
0 AGREEMENT/train/AGREEMENT_00291
0 AGREEMENT/train/AGREEMENT_00299
0 AGREEMENT/train/AGREEMENT_00332
0 AGREEMENT/train/AGREEMENT_00347
0 AGREEMENT/train/AGREEMENT_00365
0 AGREEMENT/train/AGREEMENT_00394
0 AGREEMENT/train/AGREEMENT_00421
0 AGREEMENT/train/AGREEMENT_00441
0 AGREEMENT/train/AGREEMENT_00471
0 AGREEMENT/train/AGREEMENT_00497
0 AGREEMENT/train/AGREEMENT_00534
0 AGREEMENT/train/AGREEMENT_00547
0 AGREEMENT/train/AGREEMENT_00569
0 AGREEMENT/train/AGREEMENT_00581
0 AGREEMENT/train/AGREEMENT_00591
0 AGREEMENT/train/AGREEMENT_00623
0 AGREEMENT/train/AGREEMENT_00632
0 AGREEMENT/train/AGREEMENT_00637
0 AGREEMENT/train/AGREEMENT_00673
0 AGREEMENT/train/AGREEMENT_00707
0 AGREEMENT/train/AGREEMENT_00709
0 AGREEMENT/train/AGREEMENT_00739
0 AGREEMENT/train/AGREEMENT_00763
0 AGREEMENT/train/AGREEMENT_00794
0 AGREEMENT/train/AGREEMENT_00823
0 AGREEMENT/train/AGREEMENT_00834
0 AGREEMENT/train/AGREEMENT_00842
0 AGREEMENT/train/AGREEMENT_00848
0 AGREEMENT/val/AGREEMENT_00027
0 AGREEMENT/val/AGREEMENT_00035
0 AGREEMENT/val/AGREEMENT_00042
0 AGREE/train/AGREE_00036
0 AGREE/train/AGREE_00210
0 AGREE/train/AGREE_00236
0 AGREE/train/AGREE_00288
0 AGREE/train/AGREE_00322
0 AGREE/train/AGREE_00449
0 AGREE/train/AGREE_00549
0 AGREE/train/AGREE_00628
0 AGREE/train/AGREE_00854
0 AGREE/train/AGREE_00861
0 AGREE/train/AGREE_00869
0 AGREE/train/AGREE_00893
0 AGREE/train/AGREE_00900
0 AGREE/train/AGREE_00927
0 AHEAD/test/AHEAD_00004
0 AHEAD/test/AHEAD_00015
0 AHEAD/train/AHEAD_00034
0 AHEAD/train/AHEAD_00042
0 AHEAD/train/AHEAD_00045
0 AHEAD/train/AHEAD_00072
0 AHEAD/train/AHEAD_00081
0 AHEAD/train/AHEAD_00094
0 AHEAD/train/AHEAD_00147
0 AHEAD/train/AHEAD_00156
0 AHEAD/train/AHEAD_00158
0 AHEAD/train/AHEAD_00193
0 AHEAD/train/AHEAD_00231
0 AHEAD/train/AHEAD_00234
0 AHEAD/train/AHEAD_00235
0 AHEAD/train/AHEAD_00240
0 AHEAD/train/AHEAD_00247
0 AHEAD/train/AHEAD_00289
0 AHEAD/train/AHEAD_00292
0 AHEAD/train/AHEAD_00299
0 AHEAD/train/AHEAD_00303
0 AHEAD/train/AHEAD_00319
0 AHEAD/train/AHEAD_00322
0 AHEAD/train/AHEAD_00356
0 AHEAD/train/AHEAD_00492
0 AHEAD/train/AHEAD_00514
0 AHEAD/train/AHEAD_00534
0 AHEAD/train/AHEAD_00554
0 AHEAD/train/AHEAD_00557
0 AHEAD/train/AHEAD_00566
0 AHEAD/train/AHEAD_00594
0 AHEAD/train/AHEAD_00686
0 AHEAD/train/AHEAD_00697
0 AHEAD/train/AHEAD_00703
0 AHEAD/train/AHEAD_00707
0 AHEAD/train/AHEAD_00757
0 AHEAD/train/AHEAD_00765
0 AHEAD/train/AHEAD_00786
0 AHEAD/train/AHEAD_00789
0 AHEAD/train/AHEAD_00791
0 AHEAD/train/AHEAD_00809
0 AHEAD/train/AHEAD_00864
0 AHEAD/train/AHEAD_00873
0 AHEAD/train/AHEAD_00915
0 AHEAD/train/AHEAD_00934
0 AHEAD/train/AHEAD_00976
0 AHEAD/val/AHEAD_00011
0 AHEAD/val/AHEAD_00022
0 ALLEGATIONS/test/ALLEGATIONS_00005
0 ALLEGATIONS/test/ALLEGATIONS_00010
0 ALLEGATIONS/test/ALLEGATIONS_00043
0 ALLEGATIONS/train/ALLEGATIONS_00015
0 ALLEGATIONS/train/ALLEGATIONS_00016
0 ALLEGATIONS/train/ALLEGATIONS_00023
0 ALLEGATIONS/train/ALLEGATIONS_00045
0 ALLEGATIONS/train/ALLEGATIONS_00064
0 ALLEGATIONS/train/ALLEGATIONS_00068
0 ALLEGATIONS/train/ALLEGATIONS_00103
0 ALLEGATIONS/train/ALLEGATIONS_00106
0 ALLEGATIONS/train/ALLEGATIONS_00137
0 ALLEGATIONS/train/ALLEGATIONS_00140
0 ALLEGATIONS/train/ALLEGATIONS_00144
0 ALLEGATIONS/train/ALLEGATIONS_00162
0 ALLEGATIONS/train/ALLEGATIONS_00169
0 ALLEGATIONS/train/ALLEGATIONS_00175
0 ALLEGATIONS/train/ALLEGATIONS_00182
0 ALLEGATIONS/train/ALLEGATIONS_00183
0 ALLEGATIONS/train/ALLEGATIONS_00186
0 ALLEGATIONS/train/ALLEGATIONS_00191
0 ALLEGATIONS/train/ALLEGATIONS_00195
0 ALLEGATIONS/train/ALLEGATIONS_00197
0 ALLEGATIONS/train/ALLEGATIONS_00204
0 ALLEGATIONS/train/ALLEGATIONS_00208
0 ALLEGATIONS/train/ALLEGATIONS_00229
0 ALLEGATIONS/train/ALLEGATIONS_00239
0 ALLEGATIONS/train/ALLEGATIONS_00268
0 ALLEGATIONS/train/ALLEGATIONS_00274
0 ALLEGATIONS/train/ALLEGATIONS_00303
0 ALLEGATIONS/train/ALLEGATIONS_00309
0 ALLEGATIONS/train/ALLEGATIONS_00311
0 ALLEGATIONS/train/ALLEGATIONS_00350
0 ALLEGATIONS/train/ALLEGATIONS_00370
0 ALLEGATIONS/train/ALLEGATIONS_00372
0 ALLEGATIONS/train/ALLEGATIONS_00379
0 ALLEGATIONS/train/ALLEGATIONS_00406
0 ALLEGATIONS/train/ALLEGATIONS_00415
0 ALLEGATIONS/train/ALLEGATIONS_00462
0 ALLEGATIONS/train/ALLEGATIONS_00497
0 ALLEGATIONS/train/ALLEGATIONS_00507
0 ALLEGATIONS/train/ALLEGATIONS_00529
0 ALLEGATIONS/train/ALLEGATIONS_00539
0 ALLEGATIONS/train/ALLEGATIONS_00578
0 ALLEGATIONS/train/ALLEGATIONS_00607
0 ALLEGATIONS/train/ALLEGATIONS_00626
0 ALLEGATIONS/train/ALLEGATIONS_00629
0 ALLEGATIONS/train/ALLEGATIONS_00639
0 ALLEGATIONS/train/ALLEGATIONS_00648
0 ALLEGATIONS/train/ALLEGATIONS_00649
0 ALLEGATIONS/train/ALLEGATIONS_00666
0 ALLEGATIONS/train/ALLEGATIONS_00689
0 ALLEGATIONS/train/ALLEGATIONS_00763
0 ALLEGATIONS/train/ALLEGATIONS_00769
0 ALLEGATIONS/train/ALLEGATIONS_00775
0 ALLEGATIONS/train/ALLEGATIONS_00845
0 ALLEGATIONS/train/ALLEGATIONS_00864
0 ALLEGATIONS/train/ALLEGATIONS_00869
0 ALLEGATIONS/train/ALLEGATIONS_00884
0 ALLEGATIONS/train/ALLEGATIONS_00894
0 ALLEGATIONS/train/ALLEGATIONS_00903
0 ALLEGATIONS/train/ALLEGATIONS_00908
0 ALLEGATIONS/train/ALLEGATIONS_00913
0 ALLEGATIONS/train/ALLEGATIONS_00922
0 ALLEGATIONS/train/ALLEGATIONS_00924
0 ALLEGATIONS/train/ALLEGATIONS_00953
0 ALLEGATIONS/train/ALLEGATIONS_00962
0 ALLEGATIONS/train/ALLEGATIONS_00999
0 ALLEGATIONS/val/ALLEGATIONS_00007
0 ALLEGATIONS/val/ALLEGATIONS_00012
0 ALLEGATIONS/val/ALLEGATIONS_00017
0 ALLEGATIONS/val/ALLEGATIONS_00018
0 ALLEGATIONS/val/ALLEGATIONS_00037
0 ALLEGATIONS/val/ALLEGATIONS_00046
0 ALLOWED/train/ALLOWED_00017
0 ALLOWED/train/ALLOWED_00026
0 ALLOWED/train/ALLOWED_00040
0 ALLOWED/train/ALLOWED_00047
0 ALLOWED/train/ALLOWED_00082
0 ALLOWED/train/ALLOWED_00107
0 ALLOWED/train/ALLOWED_00186
0 ALLOWED/train/ALLOWED_00218
0 ALLOWED/train/ALLOWED_00235
0 ALLOWED/train/ALLOWED_00237
0 ALLOWED/train/ALLOWED_00270
0 ALLOWED/train/ALLOWED_00273
0 ALLOWED/train/ALLOWED_00321
0 ALLOWED/train/ALLOWED_00340
0 ALLOWED/train/ALLOWED_00361
0 ALLOWED/train/ALLOWED_00433
0 ALLOWED/train/ALLOWED_00440
0 ALLOWED/train/ALLOWED_00441
0 ALLOWED/train/ALLOWED_00447
0 ALLOWED/train/ALLOWED_00489
0 ALLOWED/train/ALLOWED_00493
0 ALLOWED/train/ALLOWED_00563
0 ALLOWED/train/ALLOWED_00568
0 ALLOWED/train/ALLOWED_00598
0 ALLOWED/train/ALLOWED_00600
0 ALLOWED/train/ALLOWED_00609
0 ALLOWED/train/ALLOWED_00623
0 ALLOWED/train/ALLOWED_00624
0 ALLOWED/train/ALLOWED_00685
0 ALLOWED/train/ALLOWED_00737
0 ALLOWED/train/ALLOWED_00739
0 ALLOWED/train/ALLOWED_00781
0 ALLOWED/val/ALLOWED_00001
0 ALLOWED/val/ALLOWED_00009
0 ALLOW/test/ALLOW_00043
0 ALLOW/train/ALLOW_00016
0 ALLOW/train/ALLOW_00020
0 ALLOW/train/ALLOW_00035
0 ALLOW/train/ALLOW_00056
0 ALLOW/train/ALLOW_00093
0 ALLOW/train/ALLOW_00099
0 ALLOW/train/ALLOW_00156
0 ALLOW/train/ALLOW_00170
0 ALLOW/train/ALLOW_00182
0 ALLOW/train/ALLOW_00211
0 ALLOW/train/ALLOW_00235
0 ALLOW/train/ALLOW_00250
0 ALLOW/train/ALLOW_00255
0 ALLOW/train/ALLOW_00266
0 ALLOW/train/ALLOW_00310
0 ALLOW/train/ALLOW_00315
0 ALLOW/train/ALLOW_00336
0 ALLOW/train/ALLOW_00366
0 ALLOW/train/ALLOW_00418
0 ALLOW/train/ALLOW_00430
0 ALLOW/train/ALLOW_00460
0 ALLOW/train/ALLOW_00470
0 ALLOW/train/ALLOW_00485
0 ALLOW/train/ALLOW_00556
0 ALLOW/train/ALLOW_00573
0 ALLOW/train/ALLOW_00614
0 ALLOW/train/ALLOW_00648
0 ALLOW/train/ALLOW_00675
0 ALLOW/train/ALLOW_00732
0 ALLOW/train/ALLOW_00762
0 ALLOW/train/ALLOW_00781
0 ALLOW/train/ALLOW_00809
0 ALMOST/train/ALMOST_00058
0 ALMOST/train/ALMOST_00075
0 ALMOST/train/ALMOST_00112
0 ALMOST/train/ALMOST_00123
0 ALMOST/train/ALMOST_00152
0 ALMOST/train/ALMOST_00155
0 ALMOST/train/ALMOST_00181
0 ALMOST/train/ALMOST_00194
0 ALMOST/train/ALMOST_00216
0 ALMOST/train/ALMOST_00366
0 ALMOST/train/ALMOST_00391
0 ALMOST/train/ALMOST_00397
0 ALMOST/train/ALMOST_00416
0 ALMOST/train/ALMOST_00470
0 ALMOST/train/ALMOST_00506
0 ALMOST/train/ALMOST_00620
0 ALMOST/train/ALMOST_00651
0 ALMOST/train/ALMOST_00665
0 ALMOST/train/ALMOST_00712
0 ALMOST/train/ALMOST_00724
0 ALMOST/train/ALMOST_00786
0 ALMOST/train/ALMOST_00879
0 ALMOST/train/ALMOST_00957
0 ALMOST/train/ALMOST_00969
0 ALMOST/train/ALMOST_00983
0 ALMOST/train/ALMOST_00987
0 ALREADY/train/ALREADY_00044
0 ALREADY/train/ALREADY_00077
0 ALREADY/train/ALREADY_00082
0 ALREADY/train/ALREADY_00086
0 ALREADY/train/ALREADY_00140
0 ALREADY/train/ALREADY_00147
0 ALREADY/train/ALREADY_00162
0 ALREADY/train/ALREADY_00175
0 ALREADY/train/ALREADY_00179
0 ALREADY/train/ALREADY_00212
0 ALREADY/train/ALREADY_00254
0 ALREADY/train/ALREADY_00278
0 ALREADY/train/ALREADY_00321
0 ALREADY/train/ALREADY_00354
0 ALREADY/train/ALREADY_00393
0 ALREADY/train/ALREADY_00407
0 ALREADY/train/ALREADY_00416
0 ALREADY/train/ALREADY_00437
0 ALREADY/train/ALREADY_00439
0 ALREADY/train/ALREADY_00454
0 ALREADY/train/ALREADY_00472
0 ALREADY/train/ALREADY_00473
0 ALREADY/train/ALREADY_00476
0 ALREADY/train/ALREADY_00540
0 ALREADY/train/ALREADY_00548
0 ALREADY/train/ALREADY_00560
0 ALREADY/train/ALREADY_00591
0 ALREADY/train/ALREADY_00605
0 ALREADY/train/ALREADY_00668
0 ALREADY/train/ALREADY_00707
0 ALREADY/train/ALREADY_00726
0 ALREADY/train/ALREADY_00732
0 ALREADY/train/ALREADY_00786
0 ALREADY/train/ALREADY_00815
0 ALREADY/train/ALREADY_00820
0 ALREADY/train/ALREADY_00850
0 ALREADY/train/ALREADY_00878
0 ALREADY/train/ALREADY_00917
0 ALREADY/train/ALREADY_00965
0 ALREADY/val/ALREADY_00042
0 ALWAYS/train/ALWAYS_00036
0 ALWAYS/train/ALWAYS_00300
0 ALWAYS/train/ALWAYS_00331
0 ALWAYS/train/ALWAYS_00562
0 ALWAYS/train/ALWAYS_00716
0 ALWAYS/train/ALWAYS_00754
0 ALWAYS/train/ALWAYS_00763
0 AMERICAN/test/AMERICAN_00019
0 AMERICAN/test/AMERICAN_00030
0 AMERICAN/train/AMERICAN_00086
0 AMERICAN/train/AMERICAN_00091
0 AMERICAN/train/AMERICAN_00133
0 AMERICAN/train/AMERICAN_00148
0 AMERICAN/train/AMERICAN_00149
0 AMERICAN/train/AMERICAN_00155
0 AMERICAN/train/AMERICAN_00162
0 AMERICAN/train/AMERICAN_00163
0 AMERICAN/train/AMERICAN_00186
0 AMERICAN/train/AMERICAN_00187
0 AMERICAN/train/AMERICAN_00200
0 AMERICAN/train/AMERICAN_00208
0 AMERICAN/train/AMERICAN_00223
0 AMERICAN/train/AMERICAN_00232
0 AMERICAN/train/AMERICAN_00250
0 AMERICAN/train/AMERICAN_00300
0 AMERICAN/train/AMERICAN_00313
0 AMERICAN/train/AMERICAN_00342
0 AMERICAN/train/AMERICAN_00377
0 AMERICAN/train/AMERICAN_00394
0 AMERICAN/train/AMERICAN_00411
0 AMERICAN/train/AMERICAN_00416
0 AMERICAN/train/AMERICAN_00448
0 AMERICAN/train/AMERICAN_00473
0 AMERICAN/train/AMERICAN_00483
0 AMERICAN/train/AMERICAN_00486
0 AMERICAN/train/AMERICAN_00513
0 AMERICAN/train/AMERICAN_00522
0 AMERICAN/train/AMERICAN_00527
0 AMERICAN/train/AMERICAN_00550
0 AMERICAN/train/AMERICAN_00552
0 AMERICAN/train/AMERICAN_00553
0 AMERICAN/train/AMERICAN_00586
0 AMERICAN/train/AMERICAN_00587
0 AMERICAN/train/AMERICAN_00613
0 AMERICAN/train/AMERICAN_00674
0 AMERICAN/train/AMERICAN_00680
0 AMERICAN/train/AMERICAN_00690
0 AMERICAN/train/AMERICAN_00693
0 AMERICAN/train/AMERICAN_00710
0 AMERICAN/train/AMERICAN_00720
0 AMERICAN/train/AMERICAN_00766
0 AMERICAN/train/AMERICAN_00774
0 AMERICAN/train/AMERICAN_00808
0 AMERICAN/train/AMERICAN_00822
0 AMERICAN/train/AMERICAN_00824
0 AMERICAN/train/AMERICAN_00832
0 AMERICAN/train/AMERICAN_00855
0 AMERICAN/train/AMERICAN_00857
0 AMERICAN/train/AMERICAN_00870
0 AMERICAN/train/AMERICAN_00875
0 AMERICAN/train/AMERICAN_00878
0 AMERICAN/train/AMERICAN_00922
0 AMERICAN/train/AMERICAN_00941
0 AMERICAN/train/AMERICAN_00945
0 AMERICAN/train/AMERICAN_00964
0 AMERICAN/train/AMERICAN_00973
0 AMERICAN/train/AMERICAN_00978
0 AMERICAN/val/AMERICAN_00028
0 AMERICA/test/AMERICA_00013
0 AMERICA/train/AMERICA_00025
0 AMERICA/train/AMERICA_00063
0 AMERICA/train/AMERICA_00123
0 AMERICA/train/AMERICA_00128
0 AMERICA/train/AMERICA_00166
0 AMERICA/train/AMERICA_00194
0 AMERICA/train/AMERICA_00203
0 AMERICA/train/AMERICA_00210
0 AMERICA/train/AMERICA_00214
0 AMERICA/train/AMERICA_00223
0 AMERICA/train/AMERICA_00322
0 AMERICA/train/AMERICA_00345
0 AMERICA/train/AMERICA_00365
0 AMERICA/train/AMERICA_00432
0 AMERICA/train/AMERICA_00486
0 AMERICA/train/AMERICA_00517
0 AMERICA/train/AMERICA_00528
0 AMERICA/train/AMERICA_00560
0 AMERICA/train/AMERICA_00593
0 AMERICA/train/AMERICA_00599
0 AMERICA/train/AMERICA_00626
0 AMERICA/train/AMERICA_00640
0 AMERICA/train/AMERICA_00664
0 AMERICA/train/AMERICA_00668
0 AMERICA/train/AMERICA_00675
0 AMERICA/train/AMERICA_00676
0 AMERICA/train/AMERICA_00700
0 AMERICA/train/AMERICA_00718
0 AMERICA/train/AMERICA_00720
0 AMERICA/train/AMERICA_00724
0 AMERICA/train/AMERICA_00752
0 AMERICA/train/AMERICA_00759
0 AMERICA/train/AMERICA_00836
0 AMERICA/train/AMERICA_00878
0 AMERICA/train/AMERICA_00880
0 AMERICA/train/AMERICA_00888
0 AMERICA/train/AMERICA_00903
0 AMONG/test/AMONG_00012
0 AMONG/test/AMONG_00038
0 AMONG/test/AMONG_00041
0 AMONG/test/AMONG_00048
0 AMONG/train/AMONG_00001
0 AMONG/train/AMONG_00004
0 AMONG/train/AMONG_00007
0 AMONG/train/AMONG_00024
0 AMONG/train/AMONG_00031
0 AMONG/train/AMONG_00038
0 AMONG/train/AMONG_00041
0 AMONG/train/AMONG_00081
0 AMONG/train/AMONG_00091
0 AMONG/train/AMONG_00107
0 AMONG/train/AMONG_00115
0 AMONG/train/AMONG_00126
0 AMONG/train/AMONG_00141
0 AMONG/train/AMONG_00153
0 AMONG/train/AMONG_00159
0 AMONG/train/AMONG_00169
0 AMONG/train/AMONG_00170
0 AMONG/train/AMONG_00186
0 AMONG/train/AMONG_00205
0 AMONG/train/AMONG_00217
0 AMONG/train/AMONG_00221
0 AMONG/train/AMONG_00222
0 AMONG/train/AMONG_00227
0 AMONG/train/AMONG_00229
0 AMONG/train/AMONG_00230
0 AMONG/train/AMONG_00239
0 AMONG/train/AMONG_00257
0 AMONG/train/AMONG_00260
0 AMONG/train/AMONG_00262
0 AMONG/train/AMONG_00265
0 AMONG/train/AMONG_00266
0 AMONG/train/AMONG_00276
0 AMONG/train/AMONG_00289
0 AMONG/train/AMONG_00303
0 AMONG/train/AMONG_00312
0 AMONG/train/AMONG_00330
0 AMONG/train/AMONG_00399
0 AMONG/train/AMONG_00401
0 AMONG/train/AMONG_00402
0 AMONG/train/AMONG_00429
0 AMONG/train/AMONG_00456
0 AMONG/train/AMONG_00463
0 AMONG/train/AMONG_00471
0 AMONG/train/AMONG_00477
0 AMONG/train/AMONG_00489
0 AMONG/train/AMONG_00498
0 AMONG/train/AMONG_00511
0 AMONG/train/AMONG_00513
0 AMONG/train/AMONG_00520
0 AMONG/train/AMONG_00537
0 AMONG/train/AMONG_00541
0 AMONG/train/AMONG_00542
0 AMONG/train/AMONG_00544
0 AMONG/train/AMONG_00548
0 AMONG/train/AMONG_00558
0 AMONG/train/AMONG_00572
0 AMONG/train/AMONG_00581
0 AMONG/train/AMONG_00582
0 AMONG/train/AMONG_00583
0 AMONG/train/AMONG_00587
0 AMONG/train/AMONG_00597
0 AMONG/train/AMONG_00630
0 AMONG/train/AMONG_00639
0 AMONG/train/AMONG_00642
0 AMONG/train/AMONG_00643
0 AMONG/train/AMONG_00644
0 AMONG/train/AMONG_00645
0 AMONG/train/AMONG_00652
0 AMONG/train/AMONG_00658
0 AMONG/train/AMONG_00659
0 AMONG/train/AMONG_00667
0 AMONG/train/AMONG_00681
0 AMONG/train/AMONG_00684
0 AMONG/train/AMONG_00691
0 AMONG/train/AMONG_00694
0 AMONG/train/AMONG_00704
0 AMONG/train/AMONG_00747
0 AMONG/train/AMONG_00756
0 AMONG/train/AMONG_00762
0 AMONG/train/AMONG_00781
0 AMONG/train/AMONG_00797
0 AMONG/train/AMONG_00805
0 AMONG/train/AMONG_00809
0 AMONG/train/AMONG_00824
0 AMONG/train/AMONG_00830
0 AMONG/train/AMONG_00878
0 AMONG/train/AMONG_00882
0 AMONG/train/AMONG_00907
0 AMONG/val/AMONG_00021
0 AMONG/val/AMONG_00034
0 AMONG/val/AMONG_00037
0 AMOUNT/train/AMOUNT_00056
0 AMOUNT/train/AMOUNT_00132
0 AMOUNT/train/AMOUNT_00140
0 AMOUNT/train/AMOUNT_00234
0 AMOUNT/train/AMOUNT_00245
0 AMOUNT/train/AMOUNT_00256
0 AMOUNT/train/AMOUNT_00356
0 AMOUNT/train/AMOUNT_00362
0 AMOUNT/train/AMOUNT_00378
0 AMOUNT/train/AMOUNT_00479
0 AMOUNT/train/AMOUNT_00549
0 AMOUNT/train/AMOUNT_00562
0 AMOUNT/train/AMOUNT_00565
0 AMOUNT/train/AMOUNT_00638
0 AMOUNT/train/AMOUNT_00734
0 AMOUNT/train/AMOUNT_00776
0 AMOUNT/train/AMOUNT_00873
0 ANNOUNCED/test/ANNOUNCED_00002
0 ANNOUNCED/test/ANNOUNCED_00019
0 ANNOUNCED/test/ANNOUNCED_00030
0 ANNOUNCED/train/ANNOUNCED_00015
0 ANNOUNCED/train/ANNOUNCED_00017
0 ANNOUNCED/train/ANNOUNCED_00019
0 ANNOUNCED/train/ANNOUNCED_00035
0 ANNOUNCED/train/ANNOUNCED_00038
0 ANNOUNCED/train/ANNOUNCED_00044
0 ANNOUNCED/train/ANNOUNCED_00045
0 ANNOUNCED/train/ANNOUNCED_00046
0 ANNOUNCED/train/ANNOUNCED_00052
0 ANNOUNCED/train/ANNOUNCED_00058
0 ANNOUNCED/train/ANNOUNCED_00068
0 ANNOUNCED/train/ANNOUNCED_00073
0 ANNOUNCED/train/ANNOUNCED_00078
0 ANNOUNCED/train/ANNOUNCED_00082
0 ANNOUNCED/train/ANNOUNCED_00104
0 ANNOUNCED/train/ANNOUNCED_00113
0 ANNOUNCED/train/ANNOUNCED_00115
0 ANNOUNCED/train/ANNOUNCED_00116
0 ANNOUNCED/train/ANNOUNCED_00118
0 ANNOUNCED/train/ANNOUNCED_00121
0 ANNOUNCED/train/ANNOUNCED_00123
0 ANNOUNCED/train/ANNOUNCED_00127
0 ANNOUNCED/train/ANNOUNCED_00130
0 ANNOUNCED/train/ANNOUNCED_00137
0 ANNOUNCED/train/ANNOUNCED_00145
0 ANNOUNCED/train/ANNOUNCED_00176
0 ANNOUNCED/train/ANNOUNCED_00179
0 ANNOUNCED/train/ANNOUNCED_00195
0 ANNOUNCED/train/ANNOUNCED_00206
0 ANNOUNCED/train/ANNOUNCED_00214
0 ANNOUNCED/train/ANNOUNCED_00217
0 ANNOUNCED/train/ANNOUNCED_00218
0 ANNOUNCED/train/ANNOUNCED_00220
0 ANNOUNCED/train/ANNOUNCED_00229
0 ANNOUNCED/train/ANNOUNCED_00243
0 ANNOUNCED/train/ANNOUNCED_00245
0 ANNOUNCED/train/ANNOUNCED_00252
0 ANNOUNCED/train/ANNOUNCED_00255
0 ANNOUNCED/train/ANNOUNCED_00276
0 ANNOUNCED/train/ANNOUNCED_00280
0 ANNOUNCED/train/ANNOUNCED_00289
0 ANNOUNCED/train/ANNOUNCED_00294
0 ANNOUNCED/train/ANNOUNCED_00301
0 ANNOUNCED/train/ANNOUNCED_00308
0 ANNOUNCED/train/ANNOUNCED_00312
0 ANNOUNCED/train/ANNOUNCED_00314
0 ANNOUNCED/train/ANNOUNCED_00324
0 ANNOUNCED/train/ANNOUNCED_00326
0 ANNOUNCED/train/ANNOUNCED_00327
0 ANNOUNCED/train/ANNOUNCED_00330
0 ANNOUNCED/train/ANNOUNCED_00337
0 ANNOUNCED/train/ANNOUNCED_00338
0 ANNOUNCED/train/ANNOUNCED_00341
0 ANNOUNCED/train/ANNOUNCED_00357
0 ANNOUNCED/train/ANNOUNCED_00370
0 ANNOUNCED/train/ANNOUNCED_00376
0 ANNOUNCED/train/ANNOUNCED_00379
0 ANNOUNCED/train/ANNOUNCED_00418
0 ANNOUNCED/train/ANNOUNCED_00437
0 ANNOUNCED/train/ANNOUNCED_00455
0 ANNOUNCED/train/ANNOUNCED_00473
0 ANNOUNCED/train/ANNOUNCED_00485
0 ANNOUNCED/train/ANNOUNCED_00492
0 ANNOUNCED/train/ANNOUNCED_00518
0 ANNOUNCED/train/ANNOUNCED_00533
0 ANNOUNCED/train/ANNOUNCED_00539
0 ANNOUNCED/train/ANNOUNCED_00542
0 ANNOUNCED/train/ANNOUNCED_00550
0 ANNOUNCED/train/ANNOUNCED_00553
0 ANNOUNCED/train/ANNOUNCED_00558
0 ANNOUNCED/train/ANNOUNCED_00562
0 ANNOUNCED/train/ANNOUNCED_00586
0 ANNOUNCED/train/ANNOUNCED_00599
0 ANNOUNCED/train/ANNOUNCED_00623
0 ANNOUNCED/train/ANNOUNCED_00648
0 ANNOUNCED/train/ANNOUNCED_00649
0 ANNOUNCED/train/ANNOUNCED_00653
0 ANNOUNCED/train/ANNOUNCED_00662
0 ANNOUNCED/train/ANNOUNCED_00667
0 ANNOUNCED/train/ANNOUNCED_00685
0 ANNOUNCED/train/ANNOUNCED_00692
0 ANNOUNCED/train/ANNOUNCED_00701
0 ANNOUNCED/train/ANNOUNCED_00709
0 ANNOUNCED/train/ANNOUNCED_00713
0 ANNOUNCED/train/ANNOUNCED_00718
0 ANNOUNCED/train/ANNOUNCED_00729
0 ANNOUNCED/train/ANNOUNCED_00736
0 ANNOUNCED/train/ANNOUNCED_00763
0 ANNOUNCED/train/ANNOUNCED_00768
0 ANNOUNCED/train/ANNOUNCED_00776
0 ANNOUNCED/train/ANNOUNCED_00783
0 ANNOUNCED/train/ANNOUNCED_00803
0 ANNOUNCED/train/ANNOUNCED_00823
0 ANNOUNCED/train/ANNOUNCED_00828
0 ANNOUNCED/train/ANNOUNCED_00830
0 ANNOUNCED/train/ANNOUNCED_00853
0 ANNOUNCED/train/ANNOUNCED_00874
0 ANNOUNCED/train/ANNOUNCED_00875
0 ANNOUNCED/train/ANNOUNCED_00898
0 ANNOUNCED/train/ANNOUNCED_00901
0 ANNOUNCED/train/ANNOUNCED_00904
0 ANNOUNCED/train/ANNOUNCED_00911
0 ANNOUNCED/train/ANNOUNCED_00924
0 ANNOUNCED/train/ANNOUNCED_00925
0 ANNOUNCED/train/ANNOUNCED_00945
0 ANNOUNCED/train/ANNOUNCED_00946
0 ANNOUNCED/train/ANNOUNCED_00959
0 ANNOUNCED/train/ANNOUNCED_00963
0 ANNOUNCED/train/ANNOUNCED_00965
0 ANNOUNCED/train/ANNOUNCED_00967
0 ANNOUNCED/train/ANNOUNCED_00983
0 ANNOUNCED/val/ANNOUNCED_00015
0 ANNOUNCED/val/ANNOUNCED_00021
0 ANNOUNCED/val/ANNOUNCED_00023
0 ANNOUNCED/val/ANNOUNCED_00024
0 ANNOUNCED/val/ANNOUNCED_00031
0 ANNOUNCED/val/ANNOUNCED_00046
0 ANNOUNCED/val/ANNOUNCED_00048
0 ANOTHER/test/ANOTHER_00001
0 ANOTHER/test/ANOTHER_00003
0 ANOTHER/test/ANOTHER_00025
0 ANOTHER/train/ANOTHER_00025
0 ANOTHER/train/ANOTHER_00031
0 ANOTHER/train/ANOTHER_00037
0 ANOTHER/train/ANOTHER_00051
0 ANOTHER/train/ANOTHER_00093
0 ANOTHER/train/ANOTHER_00095
0 ANOTHER/train/ANOTHER_00161
0 ANOTHER/train/ANOTHER_00188
0 ANOTHER/train/ANOTHER_00225
0 ANOTHER/train/ANOTHER_00267
0 ANOTHER/train/ANOTHER_00413
0 ANOTHER/train/ANOTHER_00443
0 ANOTHER/train/ANOTHER_00447
0 ANOTHER/train/ANOTHER_00531
0 ANOTHER/train/ANOTHER_00588
0 ANOTHER/train/ANOTHER_00654
0 ANOTHER/train/ANOTHER_00657
0 ANOTHER/train/ANOTHER_00666
0 ANOTHER/train/ANOTHER_00673
0 ANOTHER/train/ANOTHER_00753
0 ANOTHER/train/ANOTHER_00774
0 ANOTHER/train/ANOTHER_00817
0 ANOTHER/train/ANOTHER_00840
0 ANOTHER/train/ANOTHER_00873
0 ANOTHER/train/ANOTHER_00897
0 ANOTHER/train/ANOTHER_00913
0 ANOTHER/train/ANOTHER_00920
0 ANOTHER/train/ANOTHER_00959
0 ANOTHER/val/ANOTHER_00024
0 ANOTHER/val/ANOTHER_00037
0 ANOTHER/val/ANOTHER_00045
0 ANSWER/test/ANSWER_00050
0 ANSWER/train/ANSWER_00142
0 ANSWER/train/ANSWER_00365
0 ANSWER/train/ANSWER_00489
0 ANSWER/train/ANSWER_00562
0 ANSWER/train/ANSWER_00742
0 ANSWER/train/ANSWER_00752
0 ANSWER/train/ANSWER_00796
0 ANSWER/train/ANSWER_00799
0 ANSWER/train/ANSWER_00810
0 ANSWER/train/ANSWER_00823
0 ANYTHING/train/ANYTHING_00044
0 ANYTHING/train/ANYTHING_00053
0 ANYTHING/train/ANYTHING_00207
0 ANYTHING/train/ANYTHING_00244
0 ANYTHING/train/ANYTHING_00500
0 ANYTHING/train/ANYTHING_00612
0 ANYTHING/train/ANYTHING_00690
0 AREAS/train/AREAS_00030
0 AREAS/train/AREAS_00106
0 AREAS/train/AREAS_00123
0 AREAS/train/AREAS_00138
0 AREAS/train/AREAS_00167
0 AREAS/train/AREAS_00179
0 AREAS/train/AREAS_00221
0 AREAS/train/AREAS_00243
0 AREAS/train/AREAS_00251
0 AREAS/train/AREAS_00264
0 AREAS/train/AREAS_00338
0 AREAS/train/AREAS_00380
0 AREAS/train/AREAS_00392
0 AREAS/train/AREAS_00466
0 AREAS/train/AREAS_00496
0 AREAS/train/AREAS_00525
0 AREAS/train/AREAS_00580
0 AREAS/train/AREAS_00586
0 AREAS/train/AREAS_00608
0 AREAS/train/AREAS_00626
0 AREAS/train/AREAS_00630
0 AREAS/train/AREAS_00653
0 AREAS/train/AREAS_00655
0 AREAS/train/AREAS_00734
0 AREAS/train/AREAS_00740
0 AREAS/train/AREAS_00756
0 AREAS/train/AREAS_00888
0 AREAS/train/AREAS_00891
0 AREAS/train/AREAS_00900
0 AREAS/train/AREAS_00953
0 AREAS/val/AREAS_00007
0 AREAS/val/AREAS_00026
0 AREAS/val/AREAS_00029
0 AROUND/test/AROUND_00004
0 AROUND/test/AROUND_00036
0 AROUND/train/AROUND_00053
0 AROUND/train/AROUND_00070
0 AROUND/train/AROUND_00077
0 AROUND/train/AROUND_00158
0 AROUND/train/AROUND_00173
0 AROUND/train/AROUND_00198
0 AROUND/train/AROUND_00289
0 AROUND/train/AROUND_00384
0 AROUND/train/AROUND_00439
0 AROUND/train/AROUND_00450
0 AROUND/train/AROUND_00452
0 AROUND/train/AROUND_00530
0 AROUND/train/AROUND_00622
0 AROUND/train/AROUND_00677
0 AROUND/train/AROUND_00719
0 AROUND/train/AROUND_00762
0 AROUND/train/AROUND_00804
0 AROUND/train/AROUND_00850
0 ARRESTED/test/ARRESTED_00012
0 ARRESTED/train/ARRESTED_00030
0 ARRESTED/train/ARRESTED_00042
0 ARRESTED/train/ARRESTED_00051
0 ARRESTED/train/ARRESTED_00067
0 ARRESTED/train/ARRESTED_00096
0 ARRESTED/train/ARRESTED_00102
0 ARRESTED/train/ARRESTED_00108
0 ARRESTED/train/ARRESTED_00141
0 ARRESTED/train/ARRESTED_00173
0 ARRESTED/train/ARRESTED_00201
0 ARRESTED/train/ARRESTED_00206
0 ARRESTED/train/ARRESTED_00228
0 ARRESTED/train/ARRESTED_00240
0 ARRESTED/train/ARRESTED_00244
0 ARRESTED/train/ARRESTED_00281
0 ARRESTED/train/ARRESTED_00294
0 ARRESTED/train/ARRESTED_00305
0 ARRESTED/train/ARRESTED_00313
0 ARRESTED/train/ARRESTED_00342
0 ARRESTED/train/ARRESTED_00373
0 ARRESTED/train/ARRESTED_00382
0 ARRESTED/train/ARRESTED_00409
0 ARRESTED/train/ARRESTED_00450
0 ARRESTED/train/ARRESTED_00462
0 ARRESTED/train/ARRESTED_00469
0 ARRESTED/train/ARRESTED_00474
0 ARRESTED/train/ARRESTED_00497
0 ARRESTED/train/ARRESTED_00520
0 ARRESTED/train/ARRESTED_00524
0 ARRESTED/train/ARRESTED_00540
0 ARRESTED/train/ARRESTED_00555
0 ARRESTED/train/ARRESTED_00569
0 ARRESTED/train/ARRESTED_00576
0 ARRESTED/train/ARRESTED_00593
0 ARRESTED/train/ARRESTED_00613
0 ARRESTED/train/ARRESTED_00615
0 ARRESTED/train/ARRESTED_00625
0 ARRESTED/train/ARRESTED_00633
0 ARRESTED/train/ARRESTED_00648
0 ARRESTED/train/ARRESTED_00656
0 ARRESTED/train/ARRESTED_00662
0 ARRESTED/train/ARRESTED_00699
0 ARRESTED/train/ARRESTED_00705
0 ARRESTED/train/ARRESTED_00710
0 ARRESTED/train/ARRESTED_00711
0 ARRESTED/train/ARRESTED_00722
0 ARRESTED/train/ARRESTED_00723
0 ARRESTED/train/ARRESTED_00729
0 ARRESTED/train/ARRESTED_00746
0 ARRESTED/train/ARRESTED_00778
0 ARRESTED/train/ARRESTED_00780
0 ARRESTED/train/ARRESTED_00795
0 ARRESTED/train/ARRESTED_00813
0 ARRESTED/train/ARRESTED_00823
0 ARRESTED/train/ARRESTED_00826
0 ARRESTED/train/ARRESTED_00841
0 ARRESTED/train/ARRESTED_00874
0 ARRESTED/train/ARRESTED_00886
0 ARRESTED/train/ARRESTED_00945
0 ARRESTED/train/ARRESTED_00960
0 ARRESTED/train/ARRESTED_00991
0 ARRESTED/val/ARRESTED_00004
0 ARRESTED/val/ARRESTED_00035
0 ARRESTED/val/ARRESTED_00042
0 ASKED/test/ASKED_00020
0 ASKED/test/ASKED_00036
0 ASKED/train/ASKED_00005
0 ASKED/train/ASKED_00042
0 ASKED/train/ASKED_00179
0 ASKED/train/ASKED_00218
0 ASKED/train/ASKED_00242
0 ASKED/train/ASKED_00248
0 ASKED/train/ASKED_00344
0 ASKED/train/ASKED_00345
0 ASKED/train/ASKED_00348
0 ASKED/train/ASKED_00368
0 ASKED/train/ASKED_00390
0 ASKED/train/ASKED_00456
0 ASKED/train/ASKED_00549
0 ASKED/train/ASKED_00672
0 ASKED/train/ASKED_00697
0 ASKED/train/ASKED_00718
0 ASKED/train/ASKED_00722
0 ASKED/train/ASKED_00805
0 ASKED/train/ASKED_00836
0 ASKED/train/ASKED_00844
0 ASKED/train/ASKED_00876
0 ASKED/train/ASKED_00878
0 ASKED/train/ASKED_00900
0 ASKED/val/ASKED_00019
0 ASKING/test/ASKING_00011
0 ASKING/test/ASKING_00041
0 ASKING/test/ASKING_00042
0 ASKING/test/ASKING_00050
0 ASKING/train/ASKING_00006
0 ASKING/train/ASKING_00015
0 ASKING/train/ASKING_00027
0 ASKING/train/ASKING_00050
0 ASKING/train/ASKING_00053
0 ASKING/train/ASKING_00083
0 ASKING/train/ASKING_00088
0 ASKING/train/ASKING_00102
0 ASKING/train/ASKING_00105
0 ASKING/train/ASKING_00120
0 ASKING/train/ASKING_00136
0 ASKING/train/ASKING_00143
0 ASKING/train/ASKING_00149
0 ASKING/train/ASKING_00153
0 ASKING/train/ASKING_00163
0 ASKING/train/ASKING_00164
0 ASKING/train/ASKING_00166
0 ASKING/train/ASKING_00173
0 ASKING/train/ASKING_00201
0 ASKING/train/ASKING_00202
0 ASKING/train/ASKING_00211
0 ASKING/train/ASKING_00221
0 ASKING/train/ASKING_00222
0 ASKING/train/ASKING_00257
0 ASKING/train/ASKING_00275
0 ASKING/train/ASKING_00288
0 ASKING/train/ASKING_00291
0 ASKING/train/ASKING_00294
0 ASKING/train/ASKING_00356
0 ASKING/train/ASKING_00375
0 ASKING/train/ASKING_00385
0 ASKING/train/ASKING_00420
0 ASKING/train/ASKING_00427
0 ASKING/train/ASKING_00434
0 ASKING/train/ASKING_00464
0 ASKING/train/ASKING_00468
0 ASKING/train/ASKING_00473
0 ASKING/train/ASKING_00476
0 ASKING/train/ASKING_00477
0 ASKING/train/ASKING_00479
0 ASKING/train/ASKING_00497
0 ASKING/train/ASKING_00515
0 ASKING/train/ASKING_00549
0 ASKING/train/ASKING_00554
0 ASKING/train/ASKING_00592
0 ASKING/train/ASKING_00619
0 ASKING/train/ASKING_00625
0 ASKING/train/ASKING_00640
0 ASKING/train/ASKING_00651
0 ASKING/train/ASKING_00658
0 ASKING/train/ASKING_00660
0 ASKING/train/ASKING_00672
0 ASKING/train/ASKING_00690
0 ASKING/train/ASKING_00691
0 ASKING/train/ASKING_00706
0 ASKING/train/ASKING_00731
0 ASKING/train/ASKING_00740
0 ASKING/train/ASKING_00755
0 ASKING/train/ASKING_00765
0 ASKING/train/ASKING_00768
0 ASKING/train/ASKING_00793
0 ASKING/train/ASKING_00796
0 ASKING/train/ASKING_00801
0 ASKING/train/ASKING_00802
0 ASKING/train/ASKING_00826
0 ASKING/train/ASKING_00838
0 ASKING/train/ASKING_00851
0 ASKING/train/ASKING_00857
0 ASKING/train/ASKING_00877
0 ASKING/train/ASKING_00902
0 ASKING/train/ASKING_00905
0 ASKING/train/ASKING_00928
0 ASKING/train/ASKING_00933
0 ASKING/train/ASKING_00940
0 ASKING/train/ASKING_00967
0 ASKING/train/ASKING_00983
0 ASKING/val/ASKING_00006
0 ASKING/val/ASKING_00030
0 ATTACKS/test/ATTACKS_00008
0 ATTACKS/test/ATTACKS_00014
0 ATTACKS/test/ATTACKS_00029
0 ATTACKS/test/ATTACKS_00031
0 ATTACKS/test/ATTACKS_00042
0 ATTACKS/test/ATTACKS_00049
0 ATTACKS/train/ATTACKS_00014
0 ATTACKS/train/ATTACKS_00031
0 ATTACKS/train/ATTACKS_00048
0 ATTACKS/train/ATTACKS_00053
0 ATTACKS/train/ATTACKS_00054
0 ATTACKS/train/ATTACKS_00059
0 ATTACKS/train/ATTACKS_00067
0 ATTACKS/train/ATTACKS_00072
0 ATTACKS/train/ATTACKS_00075
0 ATTACKS/train/ATTACKS_00083
0 ATTACKS/train/ATTACKS_00086
0 ATTACKS/train/ATTACKS_00094
0 ATTACKS/train/ATTACKS_00117
0 ATTACKS/train/ATTACKS_00128
0 ATTACKS/train/ATTACKS_00130
0 ATTACKS/train/ATTACKS_00135
0 ATTACKS/train/ATTACKS_00145
0 ATTACKS/train/ATTACKS_00148
0 ATTACKS/train/ATTACKS_00168
0 ATTACKS/train/ATTACKS_00169
0 ATTACKS/train/ATTACKS_00178
0 ATTACKS/train/ATTACKS_00222
0 ATTACKS/train/ATTACKS_00253
0 ATTACKS/train/ATTACKS_00259
0 ATTACKS/train/ATTACKS_00303
0 ATTACKS/train/ATTACKS_00321
0 ATTACKS/train/ATTACKS_00322
0 ATTACKS/train/ATTACKS_00339
0 ATTACKS/train/ATTACKS_00355
0 ATTACKS/train/ATTACKS_00361
0 ATTACKS/train/ATTACKS_00386
0 ATTACKS/train/ATTACKS_00416
0 ATTACKS/train/ATTACKS_00443
0 ATTACKS/train/ATTACKS_00461
0 ATTACKS/train/ATTACKS_00465
0 ATTACKS/train/ATTACKS_00515
0 ATTACKS/train/ATTACKS_00525
0 ATTACKS/train/ATTACKS_00529
0 ATTACKS/train/ATTACKS_00532
0 ATTACKS/train/ATTACKS_00540
0 ATTACKS/train/ATTACKS_00542
0 ATTACKS/train/ATTACKS_00565
0 ATTACKS/train/ATTACKS_00566
0 ATTACKS/train/ATTACKS_00570
0 ATTACKS/train/ATTACKS_00571
0 ATTACKS/train/ATTACKS_00633
0 ATTACKS/train/ATTACKS_00670
0 ATTACKS/train/ATTACKS_00710
0 ATTACKS/train/ATTACKS_00729
0 ATTACKS/train/ATTACKS_00730
0 ATTACKS/train/ATTACKS_00757
0 ATTACKS/train/ATTACKS_00783
0 ATTACKS/train/ATTACKS_00801
0 ATTACKS/train/ATTACKS_00835
0 ATTACKS/train/ATTACKS_00877
0 ATTACKS/train/ATTACKS_00879
0 ATTACKS/train/ATTACKS_00882
0 ATTACKS/train/ATTACKS_00886
0 ATTACKS/train/ATTACKS_00893
0 ATTACKS/train/ATTACKS_00916
0 ATTACKS/train/ATTACKS_00919
0 ATTACKS/train/ATTACKS_00935
0 ATTACKS/train/ATTACKS_00937
0 ATTACKS/val/ATTACKS_00020
0 ATTACKS/val/ATTACKS_00025
0 ATTACKS/val/ATTACKS_00041
0 ATTACK/test/ATTACK_00031
0 ATTACK/train/ATTACK_00009
0 ATTACK/train/ATTACK_00013
0 ATTACK/train/ATTACK_00040
0 ATTACK/train/ATTACK_00042
0 ATTACK/train/ATTACK_00043
0 ATTACK/train/ATTACK_00049
0 ATTACK/train/ATTACK_00063
0 ATTACK/train/ATTACK_00089
0 ATTACK/train/ATTACK_00110
0 ATTACK/train/ATTACK_00121
0 ATTACK/train/ATTACK_00136
0 ATTACK/train/ATTACK_00140
0 ATTACK/train/ATTACK_00182
0 ATTACK/train/ATTACK_00184
0 ATTACK/train/ATTACK_00198
0 ATTACK/train/ATTACK_00206
0 ATTACK/train/ATTACK_00246
0 ATTACK/train/ATTACK_00264
0 ATTACK/train/ATTACK_00281
0 ATTACK/train/ATTACK_00282
0 ATTACK/train/ATTACK_00289
0 ATTACK/train/ATTACK_00297
0 ATTACK/train/ATTACK_00306
0 ATTACK/train/ATTACK_00345
0 ATTACK/train/ATTACK_00347
0 ATTACK/train/ATTACK_00378
0 ATTACK/train/ATTACK_00386
0 ATTACK/train/ATTACK_00456
0 ATTACK/train/ATTACK_00467
0 ATTACK/train/ATTACK_00471
0 ATTACK/train/ATTACK_00478
0 ATTACK/train/ATTACK_00500
0 ATTACK/train/ATTACK_00501
0 ATTACK/train/ATTACK_00520
0 ATTACK/train/ATTACK_00537
0 ATTACK/train/ATTACK_00553
0 ATTACK/train/ATTACK_00563
0 ATTACK/train/ATTACK_00599
0 ATTACK/train/ATTACK_00601
0 ATTACK/train/ATTACK_00604
0 ATTACK/train/ATTACK_00614
0 ATTACK/train/ATTACK_00617
0 ATTACK/train/ATTACK_00634
0 ATTACK/train/ATTACK_00655
0 ATTACK/train/ATTACK_00684
0 ATTACK/train/ATTACK_00724
0 ATTACK/train/ATTACK_00738
0 ATTACK/train/ATTACK_00770
0 ATTACK/train/ATTACK_00809
0 ATTACK/train/ATTACK_00816
0 ATTACK/train/ATTACK_00817
0 ATTACK/train/ATTACK_00826
0 ATTACK/train/ATTACK_00828
0 ATTACK/train/ATTACK_00829
0 ATTACK/train/ATTACK_00832
0 ATTACK/train/ATTACK_00842
0 ATTACK/train/ATTACK_00849
0 ATTACK/train/ATTACK_00886
0 ATTACK/train/ATTACK_00900
0 ATTACK/train/ATTACK_00931
0 ATTACK/train/ATTACK_00957
0 ATTACK/train/ATTACK_00965
0 ATTACK/train/ATTACK_00976
0 ATTACK/val/ATTACK_00005
0 ATTACK/val/ATTACK_00021
0 ATTACK/val/ATTACK_00029
0 AUTHORITIES/test/AUTHORITIES_00036
0 AUTHORITIES/train/AUTHORITIES_00012
0 AUTHORITIES/train/AUTHORITIES_00017
0 AUTHORITIES/train/AUTHORITIES_00023
0 AUTHORITIES/train/AUTHORITIES_00025
0 AUTHORITIES/train/AUTHORITIES_00038
0 AUTHORITIES/train/AUTHORITIES_00047
0 AUTHORITIES/train/AUTHORITIES_00063
0 AUTHORITIES/train/AUTHORITIES_00084
0 AUTHORITIES/train/AUTHORITIES_00160
0 AUTHORITIES/train/AUTHORITIES_00180
0 AUTHORITIES/train/AUTHORITIES_00190
0 AUTHORITIES/train/AUTHORITIES_00216
0 AUTHORITIES/train/AUTHORITIES_00222
0 AUTHORITIES/train/AUTHORITIES_00223
0 AUTHORITIES/train/AUTHORITIES_00242
0 AUTHORITIES/train/AUTHORITIES_00244
0 AUTHORITIES/train/AUTHORITIES_00251
0 AUTHORITIES/train/AUTHORITIES_00257
0 AUTHORITIES/train/AUTHORITIES_00278
0 AUTHORITIES/train/AUTHORITIES_00299
0 AUTHORITIES/train/AUTHORITIES_00334
0 AUTHORITIES/train/AUTHORITIES_00348
0 AUTHORITIES/train/AUTHORITIES_00417
0 AUTHORITIES/train/AUTHORITIES_00425
0 AUTHORITIES/train/AUTHORITIES_00479
0 AUTHORITIES/train/AUTHORITIES_00484
0 AUTHORITIES/train/AUTHORITIES_00490
0 AUTHORITIES/train/AUTHORITIES_00497
0 AUTHORITIES/train/AUTHORITIES_00502
0 AUTHORITIES/train/AUTHORITIES_00553
0 AUTHORITIES/train/AUTHORITIES_00558
0 AUTHORITIES/train/AUTHORITIES_00567
0 AUTHORITIES/train/AUTHORITIES_00599
0 AUTHORITIES/train/AUTHORITIES_00644
0 AUTHORITIES/train/AUTHORITIES_00648
0 AUTHORITIES/train/AUTHORITIES_00666
0 AUTHORITIES/train/AUTHORITIES_00684
0 AUTHORITIES/train/AUTHORITIES_00694
0 AUTHORITIES/train/AUTHORITIES_00698
0 AUTHORITIES/train/AUTHORITIES_00720
0 AUTHORITIES/train/AUTHORITIES_00732
0 AUTHORITIES/train/AUTHORITIES_00761
0 AUTHORITIES/train/AUTHORITIES_00790
0 AUTHORITIES/train/AUTHORITIES_00804
0 AUTHORITIES/train/AUTHORITIES_00813
0 AUTHORITIES/train/AUTHORITIES_00814
0 AUTHORITIES/train/AUTHORITIES_00824
0 AUTHORITIES/train/AUTHORITIES_00828
0 AUTHORITIES/train/AUTHORITIES_00874
0 AUTHORITIES/train/AUTHORITIES_00910
0 AUTHORITIES/train/AUTHORITIES_00932
0 AUTHORITIES/train/AUTHORITIES_00938
0 AUTHORITIES/train/AUTHORITIES_00941
0 AUTHORITIES/train/AUTHORITIES_00975
0 AUTHORITIES/train/AUTHORITIES_00976
0 AUTHORITIES/train/AUTHORITIES_00984
0 AUTHORITIES/val/AUTHORITIES_00001
0 AUTHORITIES/val/AUTHORITIES_00002
0 BANKS/test/BANKS_00032
0 BANKS/train/BANKS_00013
0 BANKS/train/BANKS_00030
0 BANKS/train/BANKS_00031
0 BANKS/train/BANKS_00134
0 BANKS/train/BANKS_00152
0 BANKS/train/BANKS_00175
0 BANKS/train/BANKS_00177
0 BANKS/train/BANKS_00216
0 BANKS/train/BANKS_00224
0 BANKS/train/BANKS_00233
0 BANKS/train/BANKS_00283
0 BANKS/train/BANKS_00300
0 BANKS/train/BANKS_00345
0 BANKS/train/BANKS_00393
0 BANKS/train/BANKS_00443
0 BANKS/train/BANKS_00480
0 BANKS/train/BANKS_00554
0 BANKS/train/BANKS_00584
0 BANKS/train/BANKS_00593
0 BANKS/train/BANKS_00628
0 BANKS/train/BANKS_00674
0 BANKS/train/BANKS_00699
0 BANKS/train/BANKS_00705
0 BANKS/train/BANKS_00745
0 BANKS/train/BANKS_00797
0 BANKS/train/BANKS_00812
0 BANKS/train/BANKS_00845
0 BANKS/train/BANKS_00879
0 BANKS/train/BANKS_00951
0 BANKS/train/BANKS_00974
0 BANKS/train/BANKS_00993
0 BECAUSE/train/BECAUSE_00142
0 BECAUSE/train/BECAUSE_00427
0 BECAUSE/train/BECAUSE_00854
0 BECAUSE/train/BECAUSE_00886
0 BECOME/test/BECOME_00001
0 BECOME/test/BECOME_00028
0 BECOME/train/BECOME_00014
0 BECOME/train/BECOME_00036
0 BECOME/train/BECOME_00061
0 BECOME/train/BECOME_00064
0 BECOME/train/BECOME_00071
0 BECOME/train/BECOME_00105
0 BECOME/train/BECOME_00116
0 BECOME/train/BECOME_00122
0 BECOME/train/BECOME_00125
0 BECOME/train/BECOME_00162
0 BECOME/train/BECOME_00203
0 BECOME/train/BECOME_00211
0 BECOME/train/BECOME_00213
0 BECOME/train/BECOME_00220
0 BECOME/train/BECOME_00264
0 BECOME/train/BECOME_00291
0 BECOME/train/BECOME_00352
0 BECOME/train/BECOME_00376
0 BECOME/train/BECOME_00427
0 BECOME/train/BECOME_00465
0 BECOME/train/BECOME_00469
0 BECOME/train/BECOME_00511
0 BECOME/train/BECOME_00543
0 BECOME/train/BECOME_00547
0 BECOME/train/BECOME_00560
0 BECOME/train/BECOME_00585
0 BECOME/train/BECOME_00593
0 BECOME/train/BECOME_00613
0 BECOME/train/BECOME_00619
0 BECOME/train/BECOME_00647
0 BECOME/train/BECOME_00665
0 BECOME/train/BECOME_00719
0 BECOME/train/BECOME_00738
0 BECOME/train/BECOME_00743
0 BECOME/train/BECOME_00764
0 BECOME/train/BECOME_00819
0 BECOME/train/BECOME_00828
0 BECOME/train/BECOME_00887
0 BECOME/train/BECOME_00919
0 BECOME/train/BECOME_00938
0 BECOME/train/BECOME_00981
0 BECOME/val/BECOME_00023
0 BEFORE/test/BEFORE_00012
0 BEFORE/test/BEFORE_00029
0 BEFORE/train/BEFORE_00010
0 BEFORE/train/BEFORE_00019
0 BEFORE/train/BEFORE_00032
0 BEFORE/train/BEFORE_00180
0 BEFORE/train/BEFORE_00238
0 BEFORE/train/BEFORE_00245
0 BEFORE/train/BEFORE_00301
0 BEFORE/train/BEFORE_00398
0 BEFORE/train/BEFORE_00414
0 BEFORE/train/BEFORE_00476
0 BEFORE/train/BEFORE_00532
0 BEFORE/train/BEFORE_00536
0 BEFORE/train/BEFORE_00575
0 BEFORE/train/BEFORE_00591
0 BEFORE/train/BEFORE_00614
0 BEFORE/train/BEFORE_00710
0 BEFORE/train/BEFORE_00758
0 BEFORE/train/BEFORE_00777
0 BEFORE/train/BEFORE_00823
0 BEFORE/train/BEFORE_00879
0 BEFORE/train/BEFORE_00945
0 BEFORE/train/BEFORE_00980
0 BEFORE/train/BEFORE_00982
0 BEFORE/train/BEFORE_00984
0 BEFORE/val/BEFORE_00034
0 BEHIND/train/BEHIND_00277
0 BEHIND/train/BEHIND_00355
0 BEHIND/train/BEHIND_00368
0 BEHIND/train/BEHIND_00487
0 BEHIND/train/BEHIND_00524
0 BEHIND/train/BEHIND_00527
0 BEHIND/train/BEHIND_00705
0 BEHIND/train/BEHIND_00729
0 BEHIND/train/BEHIND_00884
0 BEHIND/train/BEHIND_00917
0 BEHIND/train/BEHIND_00967
0 BEING/test/BEING_00026
0 BEING/test/BEING_00048
0 BEING/train/BEING_00013
0 BEING/train/BEING_00026
0 BEING/train/BEING_00054
0 BEING/train/BEING_00096
0 BEING/train/BEING_00150
0 BEING/train/BEING_00225
0 BEING/train/BEING_00251
0 BEING/train/BEING_00301
0 BEING/train/BEING_00359
0 BEING/train/BEING_00451
0 BEING/train/BEING_00475
0 BEING/train/BEING_00500
0 BEING/train/BEING_00514
0 BEING/train/BEING_00519
0 BEING/train/BEING_00523
0 BEING/train/BEING_00532
0 BEING/train/BEING_00568
0 BEING/train/BEING_00575
0 BEING/train/BEING_00592
0 BEING/train/BEING_00626
0 BEING/train/BEING_00637
0 BEING/train/BEING_00642
0 BEING/train/BEING_00728
0 BEING/train/BEING_00751
0 BEING/train/BEING_00759
0 BEING/train/BEING_00824
0 BEING/train/BEING_00837
0 BEING/train/BEING_00840
0 BEING/train/BEING_00843
0 BEING/train/BEING_00919
0 BEING/train/BEING_00938
0 BEING/train/BEING_00977
0 BEING/val/BEING_00032
0 BEING/val/BEING_00035
0 BELIEVE/train/BELIEVE_00078
0 BELIEVE/train/BELIEVE_00157
0 BELIEVE/train/BELIEVE_00226
0 BELIEVE/train/BELIEVE_00275
0 BELIEVE/train/BELIEVE_00283
0 BELIEVE/train/BELIEVE_00365
0 BELIEVE/train/BELIEVE_00392
0 BELIEVE/train/BELIEVE_00402
0 BELIEVE/train/BELIEVE_00427
0 BELIEVE/train/BELIEVE_00492
0 BELIEVE/train/BELIEVE_00556
0 BELIEVE/train/BELIEVE_00595
0 BELIEVE/train/BELIEVE_00806
0 BELIEVE/train/BELIEVE_00847
0 BELIEVE/train/BELIEVE_00953
0 BENEFITS/train/BENEFITS_00025
0 BENEFITS/train/BENEFITS_00033
0 BENEFITS/train/BENEFITS_00091
0 BENEFITS/train/BENEFITS_00104
0 BENEFITS/train/BENEFITS_00107
0 BENEFITS/train/BENEFITS_00143
0 BENEFITS/train/BENEFITS_00183
0 BENEFITS/train/BENEFITS_00246
0 BENEFITS/train/BENEFITS_00276
0 BENEFITS/train/BENEFITS_00282
0 BENEFITS/train/BENEFITS_00316
0 BENEFITS/train/BENEFITS_00330
0 BENEFITS/train/BENEFITS_00372
0 BENEFITS/train/BENEFITS_00400
0 BENEFITS/train/BENEFITS_00431
0 BENEFITS/train/BENEFITS_00563
0 BENEFITS/train/BENEFITS_00578
0 BENEFITS/train/BENEFITS_00582
0 BENEFITS/train/BENEFITS_00596
0 BENEFITS/train/BENEFITS_00601
0 BENEFITS/train/BENEFITS_00692
0 BENEFITS/train/BENEFITS_00707
0 BENEFITS/train/BENEFITS_00717
0 BENEFITS/train/BENEFITS_00722
0 BENEFITS/train/BENEFITS_00802
0 BENEFITS/train/BENEFITS_00810
0 BENEFITS/train/BENEFITS_00816
0 BENEFITS/train/BENEFITS_00829
0 BENEFITS/train/BENEFITS_00873
0 BENEFITS/train/BENEFITS_00876
0 BENEFITS/train/BENEFITS_00881
0 BENEFITS/train/BENEFITS_00883
0 BENEFITS/train/BENEFITS_00887
0 BENEFITS/train/BENEFITS_00899
0 BENEFITS/train/BENEFITS_00902
0 BENEFITS/train/BENEFITS_00909
0 BENEFITS/train/BENEFITS_00920
0 BENEFITS/train/BENEFITS_00938
0 BENEFITS/train/BENEFITS_00960
0 BENEFITS/train/BENEFITS_00981
0 BENEFITS/val/BENEFITS_00014
0 BENEFITS/val/BENEFITS_00045
0 BENEFIT/test/BENEFIT_00002
0 BENEFIT/test/BENEFIT_00016
0 BENEFIT/test/BENEFIT_00027
0 BENEFIT/train/BENEFIT_00034
0 BENEFIT/train/BENEFIT_00043
0 BENEFIT/train/BENEFIT_00069
0 BENEFIT/train/BENEFIT_00135
0 BENEFIT/train/BENEFIT_00170
0 BENEFIT/train/BENEFIT_00178
0 BENEFIT/train/BENEFIT_00359
0 BENEFIT/train/BENEFIT_00428
0 BENEFIT/train/BENEFIT_00430
0 BENEFIT/train/BENEFIT_00453
0 BENEFIT/train/BENEFIT_00472
0 BENEFIT/train/BENEFIT_00542
0 BENEFIT/train/BENEFIT_00550
0 BENEFIT/train/BENEFIT_00611
0 BENEFIT/train/BENEFIT_00681
0 BENEFIT/train/BENEFIT_00726
0 BENEFIT/train/BENEFIT_00735
0 BENEFIT/train/BENEFIT_00747
0 BENEFIT/train/BENEFIT_00749
0 BENEFIT/train/BENEFIT_00776
0 BENEFIT/train/BENEFIT_00801
0 BENEFIT/train/BENEFIT_00831
0 BENEFIT/train/BENEFIT_00888
0 BENEFIT/train/BENEFIT_00922
0 BENEFIT/train/BENEFIT_00989
0 BENEFIT/val/BENEFIT_00024
0 BENEFIT/val/BENEFIT_00037
0 BETTER/train/BETTER_00239
0 BETTER/train/BETTER_00318
0 BETTER/train/BETTER_00351
0 BETTER/train/BETTER_00371
0 BETTER/train/BETTER_00440
0 BETTER/train/BETTER_00452
0 BETTER/train/BETTER_00610
0 BETTER/train/BETTER_00783
0 BETTER/train/BETTER_00786
0 BETTER/train/BETTER_00827
0 BETTER/train/BETTER_00854
0 BETTER/train/BETTER_00861
0 BETWEEN/test/BETWEEN_00046
0 BETWEEN/train/BETWEEN_00060
0 BETWEEN/train/BETWEEN_00173
0 BETWEEN/train/BETWEEN_00175
0 BETWEEN/train/BETWEEN_00212
0 BETWEEN/train/BETWEEN_00236
0 BETWEEN/train/BETWEEN_00285
0 BETWEEN/train/BETWEEN_00290
0 BETWEEN/train/BETWEEN_00313
0 BETWEEN/train/BETWEEN_00328
0 BETWEEN/train/BETWEEN_00335
0 BETWEEN/train/BETWEEN_00360
0 BETWEEN/train/BETWEEN_00396
0 BETWEEN/train/BETWEEN_00503
0 BETWEEN/train/BETWEEN_00536
0 BETWEEN/train/BETWEEN_00584
0 BETWEEN/train/BETWEEN_00598
0 BETWEEN/train/BETWEEN_00601
0 BETWEEN/train/BETWEEN_00613
0 BETWEEN/train/BETWEEN_00628
0 BETWEEN/train/BETWEEN_00714
0 BETWEEN/train/BETWEEN_00742
0 BETWEEN/train/BETWEEN_00755
0 BETWEEN/train/BETWEEN_00812
0 BETWEEN/train/BETWEEN_00877
0 BETWEEN/train/BETWEEN_00933
0 BIGGEST/test/BIGGEST_00017
0 BIGGEST/test/BIGGEST_00043
0 BIGGEST/train/BIGGEST_00023
0 BIGGEST/train/BIGGEST_00026
0 BIGGEST/train/BIGGEST_00039
0 BIGGEST/train/BIGGEST_00040
0 BIGGEST/train/BIGGEST_00075
0 BIGGEST/train/BIGGEST_00089
0 BIGGEST/train/BIGGEST_00095
0 BIGGEST/train/BIGGEST_00135
0 BIGGEST/train/BIGGEST_00138
0 BIGGEST/train/BIGGEST_00139
0 BIGGEST/train/BIGGEST_00154
0 BIGGEST/train/BIGGEST_00178
0 BIGGEST/train/BIGGEST_00206
0 BIGGEST/train/BIGGEST_00226
0 BIGGEST/train/BIGGEST_00249
0 BIGGEST/train/BIGGEST_00251
0 BIGGEST/train/BIGGEST_00296
0 BIGGEST/train/BIGGEST_00305
0 BIGGEST/train/BIGGEST_00320
0 BIGGEST/train/BIGGEST_00337
0 BIGGEST/train/BIGGEST_00343
0 BIGGEST/train/BIGGEST_00345
0 BIGGEST/train/BIGGEST_00348
0 BIGGEST/train/BIGGEST_00385
0 BIGGEST/train/BIGGEST_00443
0 BIGGEST/train/BIGGEST_00492
0 BIGGEST/train/BIGGEST_00498
0 BIGGEST/train/BIGGEST_00504
0 BIGGEST/train/BIGGEST_00547
0 BIGGEST/train/BIGGEST_00581
0 BIGGEST/train/BIGGEST_00583
0 BIGGEST/train/BIGGEST_00617
0 BIGGEST/train/BIGGEST_00627
0 BIGGEST/train/BIGGEST_00658
0 BIGGEST/train/BIGGEST_00661
0 BIGGEST/train/BIGGEST_00664
0 BIGGEST/train/BIGGEST_00687
0 BIGGEST/train/BIGGEST_00697
0 BIGGEST/train/BIGGEST_00732
0 BIGGEST/train/BIGGEST_00736
0 BIGGEST/train/BIGGEST_00742
0 BIGGEST/train/BIGGEST_00755
0 BIGGEST/train/BIGGEST_00772
0 BIGGEST/train/BIGGEST_00821
0 BIGGEST/train/BIGGEST_00833
0 BIGGEST/train/BIGGEST_00860
0 BIGGEST/train/BIGGEST_00873
0 BIGGEST/train/BIGGEST_00878
0 BIGGEST/train/BIGGEST_00882
0 BIGGEST/train/BIGGEST_00883
0 BIGGEST/train/BIGGEST_00886
0 BIGGEST/train/BIGGEST_00906
0 BIGGEST/train/BIGGEST_00920
0 BIGGEST/train/BIGGEST_00932
0 BIGGEST/train/BIGGEST_00939
0 BIGGEST/train/BIGGEST_00960
0 BIGGEST/train/BIGGEST_00968
0 BIGGEST/train/BIGGEST_00983
0 BIGGEST/train/BIGGEST_00988
0 BIGGEST/val/BIGGEST_00004
0 BIGGEST/val/BIGGEST_00011
0 BIGGEST/val/BIGGEST_00017
0 BIGGEST/val/BIGGEST_00045
0 BILLION/test/BILLION_00018
0 BILLION/train/BILLION_00011
0 BILLION/train/BILLION_00052
0 BILLION/train/BILLION_00064
0 BILLION/train/BILLION_00076
0 BILLION/train/BILLION_00078
0 BILLION/train/BILLION_00089
0 BILLION/train/BILLION_00100
0 BILLION/train/BILLION_00105
0 BILLION/train/BILLION_00121
0 BILLION/train/BILLION_00137
0 BILLION/train/BILLION_00146
0 BILLION/train/BILLION_00147
0 BILLION/train/BILLION_00149
0 BILLION/train/BILLION_00186
0 BILLION/train/BILLION_00188
0 BILLION/train/BILLION_00193
0 BILLION/train/BILLION_00225
0 BILLION/train/BILLION_00238
0 BILLION/train/BILLION_00246
0 BILLION/train/BILLION_00277
0 BILLION/train/BILLION_00282
0 BILLION/train/BILLION_00285
0 BILLION/train/BILLION_00291
0 BILLION/train/BILLION_00307
0 BILLION/train/BILLION_00309
0 BILLION/train/BILLION_00317
0 BILLION/train/BILLION_00324
0 BILLION/train/BILLION_00333
0 BILLION/train/BILLION_00335
0 BILLION/train/BILLION_00337
0 BILLION/train/BILLION_00388
0 BILLION/train/BILLION_00400
0 BILLION/train/BILLION_00445
0 BILLION/train/BILLION_00489
0 BILLION/train/BILLION_00522
0 BILLION/train/BILLION_00528
0 BILLION/train/BILLION_00532
0 BILLION/train/BILLION_00556
0 BILLION/train/BILLION_00565
0 BILLION/train/BILLION_00596
0 BILLION/train/BILLION_00653
0 BILLION/train/BILLION_00762
0 BILLION/train/BILLION_00797
0 BILLION/train/BILLION_00835
0 BILLION/train/BILLION_00847
0 BILLION/train/BILLION_00864
0 BILLION/train/BILLION_00921
0 BILLION/train/BILLION_00927
0 BILLION/train/BILLION_00930
0 BILLION/train/BILLION_00940
0 BILLION/train/BILLION_00957
0 BILLION/train/BILLION_00992
0 BILLION/train/BILLION_00996
0 BILLION/val/BILLION_00012
0 BLACK/train/BLACK_00025
0 BLACK/train/BLACK_00049
0 BLACK/train/BLACK_00086
0 BLACK/train/BLACK_00099
0 BLACK/train/BLACK_00114
0 BLACK/train/BLACK_00120
0 BLACK/train/BLACK_00163
0 BLACK/train/BLACK_00201
0 BLACK/train/BLACK_00229
0 BLACK/train/BLACK_00254
0 BLACK/train/BLACK_00340
0 BLACK/train/BLACK_00385
0 BLACK/train/BLACK_00392
0 BLACK/train/BLACK_00415
0 BLACK/train/BLACK_00473
0 BLACK/train/BLACK_00490
0 BLACK/train/BLACK_00536
0 BLACK/train/BLACK_00587
0 BLACK/train/BLACK_00593
0 BLACK/train/BLACK_00631
0 BLACK/train/BLACK_00637
0 BLACK/train/BLACK_00686
0 BLACK/val/BLACK_00018
0 BLACK/val/BLACK_00026
0 BORDER/train/BORDER_00013
0 BORDER/train/BORDER_00035
0 BORDER/train/BORDER_00083
0 BORDER/train/BORDER_00088
0 BORDER/train/BORDER_00089
0 BORDER/train/BORDER_00153
0 BORDER/train/BORDER_00157
0 BORDER/train/BORDER_00212
0 BORDER/train/BORDER_00232
0 BORDER/train/BORDER_00280
0 BORDER/train/BORDER_00323
0 BORDER/train/BORDER_00339
0 BORDER/train/BORDER_00341
0 BORDER/train/BORDER_00379
0 BORDER/train/BORDER_00437
0 BORDER/train/BORDER_00452
0 BORDER/train/BORDER_00486
0 BORDER/train/BORDER_00492
0 BORDER/train/BORDER_00503
0 BORDER/train/BORDER_00509
0 BORDER/train/BORDER_00518
0 BORDER/train/BORDER_00519
0 BORDER/train/BORDER_00529
0 BORDER/train/BORDER_00565
0 BORDER/train/BORDER_00583
0 BORDER/train/BORDER_00647
0 BORDER/train/BORDER_00651
0 BORDER/train/BORDER_00661
0 BORDER/train/BORDER_00708
0 BORDER/train/BORDER_00714
0 BORDER/train/BORDER_00734
0 BORDER/train/BORDER_00738
0 BORDER/train/BORDER_00781
0 BORDER/train/BORDER_00804
0 BORDER/train/BORDER_00812
0 BORDER/train/BORDER_00889
0 BORDER/train/BORDER_00892
0 BORDER/train/BORDER_00915
0 BORDER/train/BORDER_00995
0 BORDER/val/BORDER_00033
0 BORDER/val/BORDER_00041
0 BRING/train/BRING_00098
0 BRING/train/BRING_00147
0 BRING/train/BRING_00159
0 BRING/train/BRING_00161
0 BRING/train/BRING_00165
0 BRING/train/BRING_00207
0 BRING/train/BRING_00314
0 BRING/train/BRING_00403
0 BRING/train/BRING_00462
0 BRING/train/BRING_00518
0 BRING/train/BRING_00555
0 BRING/train/BRING_00561
0 BRING/train/BRING_00595
0 BRING/train/BRING_00681
0 BRING/train/BRING_00736
0 BRING/train/BRING_00749
0 BRING/train/BRING_00753
0 BRING/train/BRING_00837
0 BRING/train/BRING_00848
0 BRING/train/BRING_00941
0 BRING/train/BRING_00988
0 BRING/val/BRING_00004
0 BRING/val/BRING_00008
0 BRITAIN/test/BRITAIN_00023
0 BRITAIN/test/BRITAIN_00028
0 BRITAIN/test/BRITAIN_00046
0 BRITAIN/test/BRITAIN_00047
0 BRITAIN/train/BRITAIN_00006
0 BRITAIN/train/BRITAIN_00053
0 BRITAIN/train/BRITAIN_00105
0 BRITAIN/train/BRITAIN_00158
0 BRITAIN/train/BRITAIN_00185
0 BRITAIN/train/BRITAIN_00187
0 BRITAIN/train/BRITAIN_00290
0 BRITAIN/train/BRITAIN_00303
0 BRITAIN/train/BRITAIN_00308
0 BRITAIN/train/BRITAIN_00310
0 BRITAIN/train/BRITAIN_00316
0 BRITAIN/train/BRITAIN_00319
0 BRITAIN/train/BRITAIN_00327
0 BRITAIN/train/BRITAIN_00328
0 BRITAIN/train/BRITAIN_00332
0 BRITAIN/train/BRITAIN_00344
0 BRITAIN/train/BRITAIN_00370
0 BRITAIN/train/BRITAIN_00441
0 BRITAIN/train/BRITAIN_00449
0 BRITAIN/train/BRITAIN_00479
0 BRITAIN/train/BRITAIN_00496
0 BRITAIN/train/BRITAIN_00517
0 BRITAIN/train/BRITAIN_00538
0 BRITAIN/train/BRITAIN_00576
0 BRITAIN/train/BRITAIN_00624
0 BRITAIN/train/BRITAIN_00642
0 BRITAIN/train/BRITAIN_00682
0 BRITAIN/train/BRITAIN_00751
0 BRITAIN/train/BRITAIN_00783
0 BRITAIN/train/BRITAIN_00858
0 BRITAIN/train/BRITAIN_00916
0 BRITAIN/train/BRITAIN_00968
0 BRITAIN/train/BRITAIN_00969
0 BRITAIN/train/BRITAIN_00985
0 BRITAIN/train/BRITAIN_00988
0 BRITAIN/train/BRITAIN_01000
0 BRITAIN/val/BRITAIN_00032
0 BRITISH/test/BRITISH_00040
0 BRITISH/test/BRITISH_00041
0 BRITISH/train/BRITISH_00007
0 BRITISH/train/BRITISH_00047
0 BRITISH/train/BRITISH_00049
0 BRITISH/train/BRITISH_00053
0 BRITISH/train/BRITISH_00066
0 BRITISH/train/BRITISH_00069
0 BRITISH/train/BRITISH_00096
0 BRITISH/train/BRITISH_00121
0 BRITISH/train/BRITISH_00122
0 BRITISH/train/BRITISH_00170
0 BRITISH/train/BRITISH_00183
0 BRITISH/train/BRITISH_00192
0 BRITISH/train/BRITISH_00199
0 BRITISH/train/BRITISH_00216
0 BRITISH/train/BRITISH_00271
0 BRITISH/train/BRITISH_00280
0 BRITISH/train/BRITISH_00298
0 BRITISH/train/BRITISH_00305
0 BRITISH/train/BRITISH_00319
0 BRITISH/train/BRITISH_00324
0 BRITISH/train/BRITISH_00330
0 BRITISH/train/BRITISH_00354
0 BRITISH/train/BRITISH_00369
0 BRITISH/train/BRITISH_00390
0 BRITISH/train/BRITISH_00414
0 BRITISH/train/BRITISH_00424
0 BRITISH/train/BRITISH_00425
0 BRITISH/train/BRITISH_00450
0 BRITISH/train/BRITISH_00465
0 BRITISH/train/BRITISH_00488
0 BRITISH/train/BRITISH_00510
0 BRITISH/train/BRITISH_00570
0 BRITISH/train/BRITISH_00599
0 BRITISH/train/BRITISH_00623
0 BRITISH/train/BRITISH_00639
0 BRITISH/train/BRITISH_00641
0 BRITISH/train/BRITISH_00644
0 BRITISH/train/BRITISH_00653
0 BRITISH/train/BRITISH_00654
0 BRITISH/train/BRITISH_00672
0 BRITISH/train/BRITISH_00729
0 BRITISH/train/BRITISH_00734
0 BRITISH/train/BRITISH_00745
0 BRITISH/train/BRITISH_00808
0 BRITISH/train/BRITISH_00818
0 BRITISH/train/BRITISH_00825
0 BRITISH/train/BRITISH_00869
0 BRITISH/train/BRITISH_00886
0 BRITISH/train/BRITISH_00903
0 BRITISH/train/BRITISH_00942
0 BRITISH/train/BRITISH_00951
0 BRITISH/train/BRITISH_00981
0 BRITISH/train/BRITISH_00993
0 BRITISH/train/BRITISH_00994
0 BRITISH/val/BRITISH_00024
0 BROUGHT/test/BROUGHT_00030
0 BROUGHT/train/BROUGHT_00006
0 BROUGHT/train/BROUGHT_00009
0 BROUGHT/train/BROUGHT_00026
0 BROUGHT/train/BROUGHT_00047
0 BROUGHT/train/BROUGHT_00098
0 BROUGHT/train/BROUGHT_00112
0 BROUGHT/train/BROUGHT_00125
0 BROUGHT/train/BROUGHT_00143
0 BROUGHT/train/BROUGHT_00187
0 BROUGHT/train/BROUGHT_00188
0 BROUGHT/train/BROUGHT_00203
0 BROUGHT/train/BROUGHT_00247
0 BROUGHT/train/BROUGHT_00250
0 BROUGHT/train/BROUGHT_00279
0 BROUGHT/train/BROUGHT_00285
0 BROUGHT/train/BROUGHT_00294
0 BROUGHT/train/BROUGHT_00307
0 BROUGHT/train/BROUGHT_00356
0 BROUGHT/train/BROUGHT_00412
0 BROUGHT/train/BROUGHT_00434
0 BROUGHT/train/BROUGHT_00518
0 BROUGHT/train/BROUGHT_00574
0 BROUGHT/train/BROUGHT_00592
0 BROUGHT/train/BROUGHT_00600
0 BROUGHT/train/BROUGHT_00627
0 BROUGHT/train/BROUGHT_00629
0 BROUGHT/train/BROUGHT_00638
0 BROUGHT/train/BROUGHT_00658
0 BROUGHT/train/BROUGHT_00662
0 BROUGHT/train/BROUGHT_00710
0 BROUGHT/train/BROUGHT_00720
0 BROUGHT/train/BROUGHT_00728
0 BROUGHT/train/BROUGHT_00748
0 BROUGHT/train/BROUGHT_00796
0 BROUGHT/train/BROUGHT_00799
0 BROUGHT/train/BROUGHT_00812
0 BROUGHT/train/BROUGHT_00830
0 BROUGHT/train/BROUGHT_00863
0 BROUGHT/train/BROUGHT_00897
0 BROUGHT/train/BROUGHT_00935
0 BROUGHT/train/BROUGHT_00960
0 BROUGHT/train/BROUGHT_00970
0 BROUGHT/train/BROUGHT_00979
0 BROUGHT/train/BROUGHT_00985
0 BROUGHT/train/BROUGHT_00996
0 BROUGHT/val/BROUGHT_00014
0 BUDGET/test/BUDGET_00021
0 BUDGET/test/BUDGET_00022
0 BUDGET/train/BUDGET_00006
0 BUDGET/train/BUDGET_00027
0 BUDGET/train/BUDGET_00038
0 BUDGET/train/BUDGET_00063
0 BUDGET/train/BUDGET_00086
0 BUDGET/train/BUDGET_00098
0 BUDGET/train/BUDGET_00102
0 BUDGET/train/BUDGET_00141
0 BUDGET/train/BUDGET_00146
0 BUDGET/train/BUDGET_00157
0 BUDGET/train/BUDGET_00211
0 BUDGET/train/BUDGET_00259
0 BUDGET/train/BUDGET_00269
0 BUDGET/train/BUDGET_00298
0 BUDGET/train/BUDGET_00318
0 BUDGET/train/BUDGET_00357
0 BUDGET/train/BUDGET_00369
0 BUDGET/train/BUDGET_00421
0 BUDGET/train/BUDGET_00455
0 BUDGET/train/BUDGET_00466
0 BUDGET/train/BUDGET_00487
0 BUDGET/train/BUDGET_00504
0 BUDGET/train/BUDGET_00520
0 BUDGET/train/BUDGET_00531
0 BUDGET/train/BUDGET_00553
0 BUDGET/train/BUDGET_00602
0 BUDGET/train/BUDGET_00621
0 BUDGET/train/BUDGET_00629
0 BUDGET/train/BUDGET_00648
0 BUDGET/train/BUDGET_00650
0 BUDGET/train/BUDGET_00665
0 BUDGET/train/BUDGET_00690
0 BUDGET/train/BUDGET_00696
0 BUDGET/train/BUDGET_00707
0 BUDGET/train/BUDGET_00712
0 BUDGET/train/BUDGET_00746
0 BUDGET/train/BUDGET_00807
0 BUDGET/train/BUDGET_00808
0 BUDGET/train/BUDGET_00813
0 BUDGET/train/BUDGET_00815
0 BUDGET/train/BUDGET_00833
0 BUDGET/train/BUDGET_00864
0 BUDGET/train/BUDGET_00899
0 BUDGET/train/BUDGET_00901
0 BUDGET/train/BUDGET_00903
0 BUDGET/train/BUDGET_00923
0 BUDGET/train/BUDGET_00950
0 BUDGET/train/BUDGET_00980
0 BUDGET/val/BUDGET_00001
0 BUDGET/val/BUDGET_00005
0 BUDGET/val/BUDGET_00020
0 BUDGET/val/BUDGET_00030
0 BUDGET/val/BUDGET_00049
0 BUILDING/train/BUILDING_00013
0 BUILDING/train/BUILDING_00021
0 BUILDING/train/BUILDING_00142
0 BUILDING/train/BUILDING_00160
0 BUILDING/train/BUILDING_00193
0 BUILDING/train/BUILDING_00212
0 BUILDING/train/BUILDING_00314
0 BUILDING/train/BUILDING_00352
0 BUILDING/train/BUILDING_00446
0 BUILDING/train/BUILDING_00469
0 BUILDING/train/BUILDING_00475
0 BUILDING/train/BUILDING_00522
0 BUILDING/train/BUILDING_00530
0 BUILDING/train/BUILDING_00533
0 BUILDING/train/BUILDING_00543
0 BUILDING/train/BUILDING_00555
0 BUILDING/train/BUILDING_00564
0 BUILDING/train/BUILDING_00599
0 BUILDING/train/BUILDING_00610
0 BUILDING/train/BUILDING_00689
0 BUILDING/train/BUILDING_00752
0 BUILDING/train/BUILDING_00797
0 BUILDING/train/BUILDING_00835
0 BUILDING/train/BUILDING_00854
0 BUILDING/train/BUILDING_00864
0 BUILDING/train/BUILDING_00947
0 BUILDING/train/BUILDING_00984
0 BUILD/train/BUILD_00078
0 BUILD/train/BUILD_00086
0 BUILD/train/BUILD_00174
0 BUILD/train/BUILD_00188
0 BUILD/train/BUILD_00373
0 BUILD/train/BUILD_00381
0 BUILD/train/BUILD_00542
0 BUILD/train/BUILD_00558
0 BUILD/train/BUILD_00577
0 BUILD/train/BUILD_00670
0 BUILD/train/BUILD_00715
0 BUILD/train/BUILD_00743
0 BUILD/val/BUILD_00017
0 BUILD/val/BUILD_00028
0 BUSINESSES/train/BUSINESSES_00042
0 BUSINESSES/train/BUSINESSES_00055
0 BUSINESSES/train/BUSINESSES_00152
0 BUSINESSES/train/BUSINESSES_00260
0 BUSINESSES/train/BUSINESSES_00312
0 BUSINESSES/train/BUSINESSES_00352
0 BUSINESSES/train/BUSINESSES_00410
0 BUSINESSES/train/BUSINESSES_00681
0 BUSINESSES/train/BUSINESSES_00731
0 BUSINESSES/train/BUSINESSES_00779
0 BUSINESSES/train/BUSINESSES_00807
0 BUSINESSES/val/BUSINESSES_00011
0 BUSINESSES/val/BUSINESSES_00016
0 BUSINESS/train/BUSINESS_00004
0 BUSINESS/train/BUSINESS_00011
0 BUSINESS/train/BUSINESS_00034
0 BUSINESS/train/BUSINESS_00061
0 BUSINESS/train/BUSINESS_00071
0 BUSINESS/train/BUSINESS_00095
0 BUSINESS/train/BUSINESS_00108
0 BUSINESS/train/BUSINESS_00111
0 BUSINESS/train/BUSINESS_00123
0 BUSINESS/train/BUSINESS_00126
0 BUSINESS/train/BUSINESS_00141
0 BUSINESS/train/BUSINESS_00176
0 BUSINESS/train/BUSINESS_00179
0 BUSINESS/train/BUSINESS_00192
0 BUSINESS/train/BUSINESS_00213
0 BUSINESS/train/BUSINESS_00263
0 BUSINESS/train/BUSINESS_00270
0 BUSINESS/train/BUSINESS_00287
0 BUSINESS/train/BUSINESS_00289
0 BUSINESS/train/BUSINESS_00298
0 BUSINESS/train/BUSINESS_00345
0 BUSINESS/train/BUSINESS_00358
0 BUSINESS/train/BUSINESS_00364
0 BUSINESS/train/BUSINESS_00390
0 BUSINESS/train/BUSINESS_00413
0 BUSINESS/train/BUSINESS_00422
0 BUSINESS/train/BUSINESS_00442
0 BUSINESS/train/BUSINESS_00476
0 BUSINESS/train/BUSINESS_00480
0 BUSINESS/train/BUSINESS_00483
0 BUSINESS/train/BUSINESS_00485
0 BUSINESS/train/BUSINESS_00504
0 BUSINESS/train/BUSINESS_00508
0 BUSINESS/train/BUSINESS_00525
0 BUSINESS/train/BUSINESS_00535
0 BUSINESS/train/BUSINESS_00557
0 BUSINESS/train/BUSINESS_00610
0 BUSINESS/train/BUSINESS_00644
0 BUSINESS/train/BUSINESS_00653
0 BUSINESS/train/BUSINESS_00714
0 BUSINESS/train/BUSINESS_00720
0 BUSINESS/train/BUSINESS_00736
0 BUSINESS/train/BUSINESS_00747
0 BUSINESS/train/BUSINESS_00759
0 BUSINESS/train/BUSINESS_00787
0 BUSINESS/train/BUSINESS_00790
0 BUSINESS/train/BUSINESS_00799
0 BUSINESS/train/BUSINESS_00801
0 BUSINESS/train/BUSINESS_00803
0 BUSINESS/train/BUSINESS_00812
0 BUSINESS/train/BUSINESS_00813
0 BUSINESS/train/BUSINESS_00817
0 BUSINESS/train/BUSINESS_00825
0 BUSINESS/train/BUSINESS_00837
0 BUSINESS/train/BUSINESS_00873
0 BUSINESS/train/BUSINESS_00893
0 BUSINESS/train/BUSINESS_00908
0 BUSINESS/train/BUSINESS_00915
0 BUSINESS/train/BUSINESS_00924
0 BUSINESS/train/BUSINESS_00930
0 BUSINESS/train/BUSINESS_00970
0 BUSINESS/train/BUSINESS_00978
0 BUSINESS/train/BUSINESS_00980
0 BUSINESS/val/BUSINESS_00005
0 BUSINESS/val/BUSINESS_00012
0 BUSINESS/val/BUSINESS_00027
0 BUSINESS/val/BUSINESS_00036
0 BUSINESS/val/BUSINESS_00044
0 CALLED/test/CALLED_00003
0 CALLED/test/CALLED_00006
0 CALLED/test/CALLED_00023
0 CALLED/train/CALLED_00039
0 CALLED/train/CALLED_00080
0 CALLED/train/CALLED_00111
0 CALLED/train/CALLED_00128
0 CALLED/train/CALLED_00129
0 CALLED/train/CALLED_00133
0 CALLED/train/CALLED_00134
0 CALLED/train/CALLED_00168
0 CALLED/train/CALLED_00222
0 CALLED/train/CALLED_00227
0 CALLED/train/CALLED_00242
0 CALLED/train/CALLED_00252
0 CALLED/train/CALLED_00261
0 CALLED/train/CALLED_00278
0 CALLED/train/CALLED_00290
0 CALLED/train/CALLED_00319
0 CALLED/train/CALLED_00330
0 CALLED/train/CALLED_00343
0 CALLED/train/CALLED_00360
0 CALLED/train/CALLED_00379
0 CALLED/train/CALLED_00383
0 CALLED/train/CALLED_00407
0 CALLED/train/CALLED_00439
0 CALLED/train/CALLED_00451
0 CALLED/train/CALLED_00461
0 CALLED/train/CALLED_00475
0 CALLED/train/CALLED_00486
0 CALLED/train/CALLED_00501
0 CALLED/train/CALLED_00502
0 CALLED/train/CALLED_00505
0 CALLED/train/CALLED_00520
0 CALLED/train/CALLED_00570
0 CALLED/train/CALLED_00591
0 CALLED/train/CALLED_00598
0 CALLED/train/CALLED_00624
0 CALLED/train/CALLED_00637
0 CALLED/train/CALLED_00643
0 CALLED/train/CALLED_00674
0 CALLED/train/CALLED_00692
0 CALLED/train/CALLED_00736
0 CALLED/train/CALLED_00782
0 CALLED/train/CALLED_00795
0 CALLED/train/CALLED_00834
0 CALLED/train/CALLED_00906
0 CALLED/train/CALLED_00908
0 CALLED/train/CALLED_00918
0 CALLED/train/CALLED_00931
0 CALLED/train/CALLED_00932
0 CALLED/train/CALLED_00936
0 CALLED/train/CALLED_00969
0 CALLED/train/CALLED_00995
0 CALLED/val/CALLED_00016
0 CALLED/val/CALLED_00021
0 CALLED/val/CALLED_00048
0 CAMERON/test/CAMERON_00002
0 CAMERON/test/CAMERON_00005
0 CAMERON/test/CAMERON_00027
0 CAMERON/train/CAMERON_00025
0 CAMERON/train/CAMERON_00045
0 CAMERON/train/CAMERON_00051
0 CAMERON/train/CAMERON_00123
0 CAMERON/train/CAMERON_00124
0 CAMERON/train/CAMERON_00134
0 CAMERON/train/CAMERON_00167
0 CAMERON/train/CAMERON_00205
0 CAMERON/train/CAMERON_00232
0 CAMERON/train/CAMERON_00246
0 CAMERON/train/CAMERON_00286
0 CAMERON/train/CAMERON_00330
0 CAMERON/train/CAMERON_00352
0 CAMERON/train/CAMERON_00365
0 CAMERON/train/CAMERON_00367
0 CAMERON/train/CAMERON_00392
0 CAMERON/train/CAMERON_00399
0 CAMERON/train/CAMERON_00421
0 CAMERON/train/CAMERON_00450
0 CAMERON/train/CAMERON_00454
0 CAMERON/train/CAMERON_00473
0 CAMERON/train/CAMERON_00475
0 CAMERON/train/CAMERON_00501
0 CAMERON/train/CAMERON_00596
0 CAMERON/train/CAMERON_00661
0 CAMERON/train/CAMERON_00696
0 CAMERON/train/CAMERON_00701
0 CAMERON/train/CAMERON_00711
0 CAMERON/train/CAMERON_00713
0 CAMERON/train/CAMERON_00722
0 CAMERON/train/CAMERON_00752
0 CAMERON/train/CAMERON_00764
0 CAMERON/train/CAMERON_00774
0 CAMERON/train/CAMERON_00807
0 CAMERON/train/CAMERON_00818
0 CAMERON/train/CAMERON_00834
0 CAMERON/train/CAMERON_00844
0 CAMERON/train/CAMERON_00846
0 CAMERON/train/CAMERON_00860
0 CAMERON/train/CAMERON_00878
0 CAMERON/train/CAMERON_00886
0 CAMERON/train/CAMERON_00895
0 CAMERON/train/CAMERON_00896
0 CAMERON/train/CAMERON_00908
0 CAMERON/train/CAMERON_00909
0 CAMERON/train/CAMERON_00913
0 CAMERON/train/CAMERON_00915
0 CAMERON/train/CAMERON_00941
0 CAMERON/train/CAMERON_00983
0 CAMERON/train/CAMERON_00987
0 CAMERON/train/CAMERON_00988
0 CAMERON/val/CAMERON_00008
0 CAMERON/val/CAMERON_00013
0 CAMERON/val/CAMERON_00017
0 CAMERON/val/CAMERON_00049
0 CAMPAIGN/test/CAMPAIGN_00002
0 CAMPAIGN/test/CAMPAIGN_00008
0 CAMPAIGN/test/CAMPAIGN_00015
0 CAMPAIGN/test/CAMPAIGN_00045
0 CAMPAIGN/train/CAMPAIGN_00003
0 CAMPAIGN/train/CAMPAIGN_00012
0 CAMPAIGN/train/CAMPAIGN_00017
0 CAMPAIGN/train/CAMPAIGN_00021
0 CAMPAIGN/train/CAMPAIGN_00026
0 CAMPAIGN/train/CAMPAIGN_00027
0 CAMPAIGN/train/CAMPAIGN_00033
0 CAMPAIGN/train/CAMPAIGN_00040
0 CAMPAIGN/train/CAMPAIGN_00046
0 CAMPAIGN/train/CAMPAIGN_00056
0 CAMPAIGN/train/CAMPAIGN_00063
0 CAMPAIGN/train/CAMPAIGN_00069
0 CAMPAIGN/train/CAMPAIGN_00081
0 CAMPAIGN/train/CAMPAIGN_00085
0 CAMPAIGN/train/CAMPAIGN_00109
0 CAMPAIGN/train/CAMPAIGN_00119
0 CAMPAIGN/train/CAMPAIGN_00123
0 CAMPAIGN/train/CAMPAIGN_00140
0 CAMPAIGN/train/CAMPAIGN_00158
0 CAMPAIGN/train/CAMPAIGN_00163
0 CAMPAIGN/train/CAMPAIGN_00178
0 CAMPAIGN/train/CAMPAIGN_00184
0 CAMPAIGN/train/CAMPAIGN_00206
0 CAMPAIGN/train/CAMPAIGN_00214
0 CAMPAIGN/train/CAMPAIGN_00217
0 CAMPAIGN/train/CAMPAIGN_00227
0 CAMPAIGN/train/CAMPAIGN_00229
0 CAMPAIGN/train/CAMPAIGN_00231
0 CAMPAIGN/train/CAMPAIGN_00237
0 CAMPAIGN/train/CAMPAIGN_00240
0 CAMPAIGN/train/CAMPAIGN_00245
0 CAMPAIGN/train/CAMPAIGN_00248
0 CAMPAIGN/train/CAMPAIGN_00278
0 CAMPAIGN/train/CAMPAIGN_00307
0 CAMPAIGN/train/CAMPAIGN_00344
0 CAMPAIGN/train/CAMPAIGN_00368
0 CAMPAIGN/train/CAMPAIGN_00384
0 CAMPAIGN/train/CAMPAIGN_00388
0 CAMPAIGN/train/CAMPAIGN_00394
0 CAMPAIGN/train/CAMPAIGN_00403
0 CAMPAIGN/train/CAMPAIGN_00411
0 CAMPAIGN/train/CAMPAIGN_00428
0 CAMPAIGN/train/CAMPAIGN_00461
0 CAMPAIGN/train/CAMPAIGN_00504
0 CAMPAIGN/train/CAMPAIGN_00516
0 CAMPAIGN/train/CAMPAIGN_00537
0 CAMPAIGN/train/CAMPAIGN_00550
0 CAMPAIGN/train/CAMPAIGN_00581
0 CAMPAIGN/train/CAMPAIGN_00607
0 CAMPAIGN/train/CAMPAIGN_00624
0 CAMPAIGN/train/CAMPAIGN_00629
0 CAMPAIGN/train/CAMPAIGN_00646
0 CAMPAIGN/train/CAMPAIGN_00648
0 CAMPAIGN/train/CAMPAIGN_00665
0 CAMPAIGN/train/CAMPAIGN_00682
0 CAMPAIGN/train/CAMPAIGN_00695
0 CAMPAIGN/train/CAMPAIGN_00698
0 CAMPAIGN/train/CAMPAIGN_00710
0 CAMPAIGN/train/CAMPAIGN_00733
0 CAMPAIGN/train/CAMPAIGN_00742
0 CAMPAIGN/train/CAMPAIGN_00749
0 CAMPAIGN/train/CAMPAIGN_00755
0 CAMPAIGN/train/CAMPAIGN_00756
0 CAMPAIGN/train/CAMPAIGN_00765
0 CAMPAIGN/train/CAMPAIGN_00806
0 CAMPAIGN/train/CAMPAIGN_00810
0 CAMPAIGN/train/CAMPAIGN_00813
0 CAMPAIGN/train/CAMPAIGN_00817
0 CAMPAIGN/train/CAMPAIGN_00832
0 CAMPAIGN/train/CAMPAIGN_00840
0 CAMPAIGN/train/CAMPAIGN_00856
0 CAMPAIGN/train/CAMPAIGN_00859
0 CAMPAIGN/train/CAMPAIGN_00862
0 CAMPAIGN/train/CAMPAIGN_00869
0 CAMPAIGN/train/CAMPAIGN_00872
0 CAMPAIGN/train/CAMPAIGN_00875
0 CAMPAIGN/train/CAMPAIGN_00896
0 CAMPAIGN/train/CAMPAIGN_00906
0 CAMPAIGN/train/CAMPAIGN_00917
0 CAMPAIGN/train/CAMPAIGN_00919
0 CAMPAIGN/train/CAMPAIGN_00953
0 CAMPAIGN/train/CAMPAIGN_00988
0 CAMPAIGN/val/CAMPAIGN_00027
0 CANCER/test/CANCER_00026
0 CANCER/test/CANCER_00038
0 CANCER/train/CANCER_00022
0 CANCER/train/CANCER_00057
0 CANCER/train/CANCER_00066
0 CANCER/train/CANCER_00082
0 CANCER/train/CANCER_00085
0 CANCER/train/CANCER_00118
0 CANCER/train/CANCER_00235
0 CANCER/train/CANCER_00256
0 CANCER/train/CANCER_00266
0 CANCER/train/CANCER_00271
0 CANCER/train/CANCER_00276
0 CANCER/train/CANCER_00302
0 CANCER/train/CANCER_00322
0 CANCER/train/CANCER_00385
0 CANCER/train/CANCER_00392
0 CANCER/train/CANCER_00406
0 CANCER/train/CANCER_00410
0 CANCER/train/CANCER_00424
0 CANCER/train/CANCER_00472
0 CANCER/train/CANCER_00533
0 CANCER/train/CANCER_00540
0 CANCER/train/CANCER_00588
0 CANCER/train/CANCER_00603
0 CANCER/train/CANCER_00607
0 CANCER/train/CANCER_00609
0 CANCER/train/CANCER_00694
0 CANCER/train/CANCER_00708
0 CANCER/train/CANCER_00724
0 CANCER/train/CANCER_00744
0 CANCER/train/CANCER_00797
0 CANCER/train/CANCER_00799
0 CANCER/train/CANCER_00809
0 CANCER/train/CANCER_00827
0 CANNOT/train/CANNOT_00210
0 CANNOT/train/CANNOT_00454
0 CANNOT/train/CANNOT_00505
0 CAPITAL/test/CAPITAL_00025
0 CAPITAL/train/CAPITAL_00044
0 CAPITAL/train/CAPITAL_00057
0 CAPITAL/train/CAPITAL_00098
0 CAPITAL/train/CAPITAL_00104
0 CAPITAL/train/CAPITAL_00118
0 CAPITAL/train/CAPITAL_00150
0 CAPITAL/train/CAPITAL_00162
0 CAPITAL/train/CAPITAL_00180
0 CAPITAL/train/CAPITAL_00201
0 CAPITAL/train/CAPITAL_00203
0 CAPITAL/train/CAPITAL_00233
0 CAPITAL/train/CAPITAL_00286
0 CAPITAL/train/CAPITAL_00354
0 CAPITAL/train/CAPITAL_00377
0 CAPITAL/train/CAPITAL_00400
0 CAPITAL/train/CAPITAL_00422
0 CAPITAL/train/CAPITAL_00428
0 CAPITAL/train/CAPITAL_00434
0 CAPITAL/train/CAPITAL_00455
0 CAPITAL/train/CAPITAL_00471
0 CAPITAL/train/CAPITAL_00474
0 CAPITAL/train/CAPITAL_00510
0 CAPITAL/train/CAPITAL_00513
0 CAPITAL/train/CAPITAL_00520
0 CAPITAL/train/CAPITAL_00551
0 CAPITAL/train/CAPITAL_00554
0 CAPITAL/train/CAPITAL_00610
0 CAPITAL/train/CAPITAL_00646
0 CAPITAL/train/CAPITAL_00740
0 CAPITAL/train/CAPITAL_00744
0 CAPITAL/train/CAPITAL_00753
0 CAPITAL/train/CAPITAL_00763
0 CAPITAL/train/CAPITAL_00791
0 CAPITAL/train/CAPITAL_00801
0 CAPITAL/train/CAPITAL_00842
0 CAPITAL/train/CAPITAL_00899
0 CAPITAL/train/CAPITAL_00929
0 CAPITAL/train/CAPITAL_00931
0 CAPITAL/train/CAPITAL_00947
0 CAPITAL/val/CAPITAL_00016
0 CAPITAL/val/CAPITAL_00023
0 CAPITAL/val/CAPITAL_00026
0 CASES/test/CASES_00006
0 CASES/train/CASES_00114
0 CASES/train/CASES_00234
0 CASES/train/CASES_00236
0 CASES/train/CASES_00404
0 CASES/train/CASES_00430
0 CASES/train/CASES_00493
0 CASES/train/CASES_00516
0 CASES/train/CASES_00535
0 CASES/train/CASES_00569
0 CASES/train/CASES_00643
0 CASES/train/CASES_00700
0 CASES/train/CASES_00724
0 CASES/train/CASES_00735
0 CASES/train/CASES_00752
0 CASES/train/CASES_00767
0 CASES/train/CASES_00796
0 CASES/train/CASES_00930
0 CASES/train/CASES_00937
0 CASES/train/CASES_00963
0 CENTRAL/test/CENTRAL_00002
0 CENTRAL/test/CENTRAL_00032
0 CENTRAL/train/CENTRAL_00130
0 CENTRAL/train/CENTRAL_00132
0 CENTRAL/train/CENTRAL_00222
0 CENTRAL/train/CENTRAL_00295
0 CENTRAL/train/CENTRAL_00333
0 CENTRAL/train/CENTRAL_00341
0 CENTRAL/train/CENTRAL_00432
0 CENTRAL/train/CENTRAL_00440
0 CENTRAL/train/CENTRAL_00473
0 CENTRAL/train/CENTRAL_00482
0 CENTRAL/train/CENTRAL_00489
0 CENTRAL/train/CENTRAL_00528
0 CENTRAL/train/CENTRAL_00536
0 CENTRAL/train/CENTRAL_00571
0 CENTRAL/train/CENTRAL_00634
0 CENTRAL/train/CENTRAL_00673
0 CENTRAL/train/CENTRAL_00690
0 CENTRAL/train/CENTRAL_00703
0 CENTRAL/train/CENTRAL_00725
0 CENTRAL/train/CENTRAL_00761
0 CENTRAL/train/CENTRAL_00765
0 CENTRAL/train/CENTRAL_00768
0 CENTRAL/train/CENTRAL_00788
0 CENTRAL/train/CENTRAL_00790
0 CENTRAL/train/CENTRAL_00857
0 CENTRAL/train/CENTRAL_00967
0 CENTRAL/train/CENTRAL_00984
0 CENTRAL/train/CENTRAL_00992
0 CENTRAL/train/CENTRAL_00994
0 CENTRAL/val/CENTRAL_00033
0 CERTAINLY/train/CERTAINLY_00051
0 CERTAINLY/train/CERTAINLY_00293
0 CERTAINLY/train/CERTAINLY_00691
0 CERTAINLY/train/CERTAINLY_00793
0 CERTAINLY/train/CERTAINLY_00829
0 CHALLENGE/train/CHALLENGE_00058
0 CHALLENGE/train/CHALLENGE_00065
0 CHALLENGE/train/CHALLENGE_00072
0 CHALLENGE/train/CHALLENGE_00103
0 CHALLENGE/train/CHALLENGE_00158
0 CHALLENGE/train/CHALLENGE_00245
0 CHALLENGE/train/CHALLENGE_00337
0 CHALLENGE/train/CHALLENGE_00348
0 CHALLENGE/train/CHALLENGE_00356
0 CHALLENGE/train/CHALLENGE_00369
0 CHALLENGE/train/CHALLENGE_00435
0 CHALLENGE/train/CHALLENGE_00445
0 CHALLENGE/train/CHALLENGE_00495
0 CHALLENGE/train/CHALLENGE_00528
0 CHALLENGE/train/CHALLENGE_00548
0 CHALLENGE/train/CHALLENGE_00569
0 CHALLENGE/train/CHALLENGE_00618
0 CHALLENGE/train/CHALLENGE_00637
0 CHALLENGE/train/CHALLENGE_00648
0 CHALLENGE/train/CHALLENGE_00692
0 CHALLENGE/train/CHALLENGE_00700
0 CHALLENGE/train/CHALLENGE_00747
0 CHALLENGE/train/CHALLENGE_00778
0 CHALLENGE/train/CHALLENGE_00784
0 CHALLENGE/train/CHALLENGE_00809
0 CHALLENGE/train/CHALLENGE_00818
0 CHALLENGE/train/CHALLENGE_00832
0 CHALLENGE/train/CHALLENGE_00836
0 CHALLENGE/train/CHALLENGE_00839
0 CHALLENGE/train/CHALLENGE_00862
0 CHALLENGE/train/CHALLENGE_00867
0 CHALLENGE/train/CHALLENGE_00889
0 CHALLENGE/train/CHALLENGE_00890
0 CHALLENGE/train/CHALLENGE_00896
0 CHALLENGE/val/CHALLENGE_00050
0 CHANCE/test/CHANCE_00039
0 CHANCE/train/CHANCE_00201
0 CHANCE/train/CHANCE_00407
0 CHANCE/val/CHANCE_00046
0 CHANGES/test/CHANGES_00034
0 CHANGES/test/CHANGES_00039
0 CHANGES/train/CHANGES_00036
0 CHANGES/train/CHANGES_00043
0 CHANGES/train/CHANGES_00068
0 CHANGES/train/CHANGES_00088
0 CHANGES/train/CHANGES_00113
0 CHANGES/train/CHANGES_00120
0 CHANGES/train/CHANGES_00125
0 CHANGES/train/CHANGES_00140
0 CHANGES/train/CHANGES_00190
0 CHANGES/train/CHANGES_00229
0 CHANGES/train/CHANGES_00232
0 CHANGES/train/CHANGES_00254
0 CHANGES/train/CHANGES_00286
0 CHANGES/train/CHANGES_00290
0 CHANGES/train/CHANGES_00301
0 CHANGES/train/CHANGES_00303
0 CHANGES/train/CHANGES_00321
0 CHANGES/train/CHANGES_00337
0 CHANGES/train/CHANGES_00339
0 CHANGES/train/CHANGES_00344
0 CHANGES/train/CHANGES_00346
0 CHANGES/train/CHANGES_00363
0 CHANGES/train/CHANGES_00375
0 CHANGES/train/CHANGES_00380
0 CHANGES/train/CHANGES_00393
0 CHANGES/train/CHANGES_00394
0 CHANGES/train/CHANGES_00405
0 CHANGES/train/CHANGES_00410
0 CHANGES/train/CHANGES_00419
0 CHANGES/train/CHANGES_00473
0 CHANGES/train/CHANGES_00503
0 CHANGES/train/CHANGES_00507
0 CHANGES/train/CHANGES_00535
0 CHANGES/train/CHANGES_00550
0 CHANGES/train/CHANGES_00579
0 CHANGES/train/CHANGES_00580
0 CHANGES/train/CHANGES_00623
0 CHANGES/train/CHANGES_00640
0 CHANGES/train/CHANGES_00663
0 CHANGES/train/CHANGES_00664
0 CHANGES/train/CHANGES_00668
0 CHANGES/train/CHANGES_00687
0 CHANGES/train/CHANGES_00697
0 CHANGES/train/CHANGES_00699
0 CHANGES/train/CHANGES_00708
0 CHANGES/train/CHANGES_00756
0 CHANGES/train/CHANGES_00762
0 CHANGES/train/CHANGES_00788
0 CHANGES/train/CHANGES_00801
0 CHANGES/train/CHANGES_00811
0 CHANGES/train/CHANGES_00820
0 CHANGES/train/CHANGES_00824
0 CHANGES/train/CHANGES_00857
0 CHANGES/train/CHANGES_00914
0 CHANGES/train/CHANGES_00927
0 CHANGES/train/CHANGES_00947
0 CHANGES/train/CHANGES_00951
0 CHANGES/train/CHANGES_00983
0 CHANGES/train/CHANGES_00988
0 CHANGES/val/CHANGES_00014
0 CHANGE/test/CHANGE_00043
0 CHANGE/train/CHANGE_00055
0 CHANGE/train/CHANGE_00108
0 CHANGE/train/CHANGE_00174
0 CHANGE/train/CHANGE_00181
0 CHANGE/train/CHANGE_00184
0 CHANGE/train/CHANGE_00189
0 CHANGE/train/CHANGE_00199
0 CHANGE/train/CHANGE_00207
0 CHANGE/train/CHANGE_00244
0 CHANGE/train/CHANGE_00329
0 CHANGE/train/CHANGE_00343
0 CHANGE/train/CHANGE_00463
0 CHANGE/train/CHANGE_00476
0 CHANGE/train/CHANGE_00485
0 CHANGE/train/CHANGE_00553
0 CHANGE/train/CHANGE_00573
0 CHANGE/train/CHANGE_00581
0 CHANGE/train/CHANGE_00587
0 CHANGE/train/CHANGE_00594
0 CHANGE/train/CHANGE_00613
0 CHANGE/train/CHANGE_00658
0 CHANGE/train/CHANGE_00706
0 CHANGE/train/CHANGE_00749
0 CHANGE/train/CHANGE_00776
0 CHANGE/train/CHANGE_00811
0 CHANGE/train/CHANGE_00825
0 CHANGE/train/CHANGE_00844
0 CHANGE/train/CHANGE_00902
0 CHANGE/train/CHANGE_00904
0 CHANGE/train/CHANGE_00944
0 CHANGE/train/CHANGE_00971
0 CHANGE/train/CHANGE_00975
0 CHANGE/val/CHANGE_00036
0 CHARGES/test/CHARGES_00027
0 CHARGES/test/CHARGES_00048
0 CHARGES/train/CHARGES_00004
0 CHARGES/train/CHARGES_00008
0 CHARGES/train/CHARGES_00013
0 CHARGES/train/CHARGES_00044
0 CHARGES/train/CHARGES_00055
0 CHARGES/train/CHARGES_00066
0 CHARGES/train/CHARGES_00087
0 CHARGES/train/CHARGES_00109
0 CHARGES/train/CHARGES_00117
0 CHARGES/train/CHARGES_00129
0 CHARGES/train/CHARGES_00143
0 CHARGES/train/CHARGES_00154
0 CHARGES/train/CHARGES_00157
0 CHARGES/train/CHARGES_00185
0 CHARGES/train/CHARGES_00186
0 CHARGES/train/CHARGES_00196
0 CHARGES/train/CHARGES_00199
0 CHARGES/train/CHARGES_00205
0 CHARGES/train/CHARGES_00221
0 CHARGES/train/CHARGES_00225
0 CHARGES/train/CHARGES_00241
0 CHARGES/train/CHARGES_00261
0 CHARGES/train/CHARGES_00276
0 CHARGES/train/CHARGES_00280
0 CHARGES/train/CHARGES_00287
0 CHARGES/train/CHARGES_00304
0 CHARGES/train/CHARGES_00310
0 CHARGES/train/CHARGES_00331
0 CHARGES/train/CHARGES_00349
0 CHARGES/train/CHARGES_00363
0 CHARGES/train/CHARGES_00366
0 CHARGES/train/CHARGES_00368
0 CHARGES/train/CHARGES_00382
0 CHARGES/train/CHARGES_00383
0 CHARGES/train/CHARGES_00401
0 CHARGES/train/CHARGES_00449
0 CHARGES/train/CHARGES_00454
0 CHARGES/train/CHARGES_00458
0 CHARGES/train/CHARGES_00470
0 CHARGES/train/CHARGES_00477
0 CHARGES/train/CHARGES_00483
0 CHARGES/train/CHARGES_00491
0 CHARGES/train/CHARGES_00498
0 CHARGES/train/CHARGES_00507
0 CHARGES/train/CHARGES_00535
0 CHARGES/train/CHARGES_00539
0 CHARGES/train/CHARGES_00542
0 CHARGES/train/CHARGES_00544
0 CHARGES/train/CHARGES_00553
0 CHARGES/train/CHARGES_00559
0 CHARGES/train/CHARGES_00586
0 CHARGES/train/CHARGES_00603
0 CHARGES/train/CHARGES_00638
0 CHARGES/train/CHARGES_00641
0 CHARGES/train/CHARGES_00655
0 CHARGES/train/CHARGES_00659
0 CHARGES/train/CHARGES_00660
0 CHARGES/train/CHARGES_00661
0 CHARGES/train/CHARGES_00674
0 CHARGES/train/CHARGES_00702
0 CHARGES/train/CHARGES_00703
0 CHARGES/train/CHARGES_00706
0 CHARGES/train/CHARGES_00716
0 CHARGES/train/CHARGES_00724
0 CHARGES/train/CHARGES_00729
0 CHARGES/train/CHARGES_00738
0 CHARGES/train/CHARGES_00744
0 CHARGES/train/CHARGES_00754
0 CHARGES/train/CHARGES_00759
0 CHARGES/train/CHARGES_00782
0 CHARGES/train/CHARGES_00800
0 CHARGES/train/CHARGES_00805
0 CHARGES/train/CHARGES_00812
0 CHARGES/train/CHARGES_00836
0 CHARGES/train/CHARGES_00857
0 CHARGES/train/CHARGES_00872
0 CHARGES/train/CHARGES_00878
0 CHARGES/train/CHARGES_00911
0 CHARGES/train/CHARGES_00918
0 CHARGES/train/CHARGES_00945
0 CHARGES/train/CHARGES_00960
0 CHARGES/val/CHARGES_00002
0 CHARGES/val/CHARGES_00017
0 CHARGE/test/CHARGE_00043
0 CHARGE/train/CHARGE_00018
0 CHARGE/train/CHARGE_00026
0 CHARGE/train/CHARGE_00049
0 CHARGE/train/CHARGE_00050
0 CHARGE/train/CHARGE_00057
0 CHARGE/train/CHARGE_00063
0 CHARGE/train/CHARGE_00068
0 CHARGE/train/CHARGE_00084
0 CHARGE/train/CHARGE_00089
0 CHARGE/train/CHARGE_00100
0 CHARGE/train/CHARGE_00125
0 CHARGE/train/CHARGE_00138
0 CHARGE/train/CHARGE_00143
0 CHARGE/train/CHARGE_00172
0 CHARGE/train/CHARGE_00197
0 CHARGE/train/CHARGE_00214
0 CHARGE/train/CHARGE_00323
0 CHARGE/train/CHARGE_00364
0 CHARGE/train/CHARGE_00427
0 CHARGE/train/CHARGE_00457
0 CHARGE/train/CHARGE_00497
0 CHARGE/train/CHARGE_00518
0 CHARGE/train/CHARGE_00530
0 CHARGE/train/CHARGE_00543
0 CHARGE/train/CHARGE_00570
0 CHARGE/train/CHARGE_00599
0 CHARGE/train/CHARGE_00616
0 CHARGE/train/CHARGE_00622
0 CHARGE/train/CHARGE_00669
0 CHARGE/train/CHARGE_00684
0 CHARGE/train/CHARGE_00692
0 CHARGE/train/CHARGE_00748
0 CHARGE/train/CHARGE_00766
0 CHARGE/train/CHARGE_00822
0 CHARGE/val/CHARGE_00026
0 CHIEF/test/CHIEF_00019
0 CHIEF/test/CHIEF_00050
0 CHIEF/train/CHIEF_00003
0 CHIEF/train/CHIEF_00014
0 CHIEF/train/CHIEF_00027
0 CHIEF/train/CHIEF_00038
0 CHIEF/train/CHIEF_00053
0 CHIEF/train/CHIEF_00059
0 CHIEF/train/CHIEF_00091
0 CHIEF/train/CHIEF_00098
0 CHIEF/train/CHIEF_00108
0 CHIEF/train/CHIEF_00110
0 CHIEF/train/CHIEF_00127
0 CHIEF/train/CHIEF_00173
0 CHIEF/train/CHIEF_00174
0 CHIEF/train/CHIEF_00201
0 CHIEF/train/CHIEF_00208
0 CHIEF/train/CHIEF_00216
0 CHIEF/train/CHIEF_00226
0 CHIEF/train/CHIEF_00233
0 CHIEF/train/CHIEF_00235
0 CHIEF/train/CHIEF_00239
0 CHIEF/train/CHIEF_00242
0 CHIEF/train/CHIEF_00258
0 CHIEF/train/CHIEF_00275
0 CHIEF/train/CHIEF_00297
0 CHIEF/train/CHIEF_00306
0 CHIEF/train/CHIEF_00328
0 CHIEF/train/CHIEF_00331
0 CHIEF/train/CHIEF_00337
0 CHIEF/train/CHIEF_00339
0 CHIEF/train/CHIEF_00346
0 CHIEF/train/CHIEF_00368
0 CHIEF/train/CHIEF_00378
0 CHIEF/train/CHIEF_00393
0 CHIEF/train/CHIEF_00411
0 CHIEF/train/CHIEF_00415
0 CHIEF/train/CHIEF_00419
0 CHIEF/train/CHIEF_00445
0 CHIEF/train/CHIEF_00447
0 CHIEF/train/CHIEF_00457
0 CHIEF/train/CHIEF_00468
0 CHIEF/train/CHIEF_00469
0 CHIEF/train/CHIEF_00489
0 CHIEF/train/CHIEF_00494
0 CHIEF/train/CHIEF_00503
0 CHIEF/train/CHIEF_00523
0 CHIEF/train/CHIEF_00534
0 CHIEF/train/CHIEF_00537
0 CHIEF/train/CHIEF_00544
0 CHIEF/train/CHIEF_00585
0 CHIEF/train/CHIEF_00587
0 CHIEF/train/CHIEF_00627
0 CHIEF/train/CHIEF_00646
0 CHIEF/train/CHIEF_00658
0 CHIEF/train/CHIEF_00668
0 CHIEF/train/CHIEF_00679
0 CHIEF/train/CHIEF_00697
0 CHIEF/train/CHIEF_00711
0 CHIEF/train/CHIEF_00714
0 CHIEF/train/CHIEF_00716
0 CHIEF/train/CHIEF_00722
0 CHIEF/train/CHIEF_00747
0 CHIEF/train/CHIEF_00763
0 CHIEF/train/CHIEF_00770
0 CHIEF/train/CHIEF_00771
0 CHIEF/train/CHIEF_00772
0 CHIEF/train/CHIEF_00802
0 CHIEF/train/CHIEF_00809
0 CHIEF/train/CHIEF_00834
0 CHIEF/train/CHIEF_00848
0 CHIEF/train/CHIEF_00854
0 CHIEF/train/CHIEF_00861
0 CHIEF/train/CHIEF_00862
0 CHIEF/train/CHIEF_00874
0 CHIEF/train/CHIEF_00906
0 CHIEF/train/CHIEF_00912
0 CHIEF/train/CHIEF_00918
0 CHIEF/train/CHIEF_00921
0 CHIEF/train/CHIEF_00927
0 CHIEF/train/CHIEF_00929
0 CHIEF/train/CHIEF_00933
0 CHIEF/train/CHIEF_00951
0 CHIEF/train/CHIEF_00956
0 CHIEF/train/CHIEF_00968
0 CHIEF/train/CHIEF_00971
0 CHIEF/train/CHIEF_00973
0 CHIEF/train/CHIEF_00982
0 CHIEF/train/CHIEF_00987
0 CHIEF/train/CHIEF_00999
0 CHIEF/val/CHIEF_00026
0 CHIEF/val/CHIEF_00043
0 CHILDREN/test/CHILDREN_00014
0 CHILDREN/train/CHILDREN_00085
0 CHILDREN/train/CHILDREN_00117
0 CHILDREN/train/CHILDREN_00144
0 CHILDREN/train/CHILDREN_00256
0 CHILDREN/train/CHILDREN_00275
0 CHILDREN/train/CHILDREN_00290
0 CHILDREN/train/CHILDREN_00305
0 CHILDREN/train/CHILDREN_00313
0 CHILDREN/train/CHILDREN_00318
0 CHILDREN/train/CHILDREN_00348
0 CHILDREN/train/CHILDREN_00353
0 CHILDREN/train/CHILDREN_00360
0 CHILDREN/train/CHILDREN_00374
0 CHILDREN/train/CHILDREN_00395
0 CHILDREN/train/CHILDREN_00401
0 CHILDREN/train/CHILDREN_00433
0 CHILDREN/train/CHILDREN_00447
0 CHILDREN/train/CHILDREN_00453
0 CHILDREN/train/CHILDREN_00465
0 CHILDREN/train/CHILDREN_00472
0 CHILDREN/train/CHILDREN_00493
0 CHILDREN/train/CHILDREN_00562
0 CHILDREN/train/CHILDREN_00654
0 CHILDREN/train/CHILDREN_00724
0 CHILDREN/train/CHILDREN_00773
0 CHILDREN/train/CHILDREN_00811
0 CHILDREN/train/CHILDREN_00824
0 CHILDREN/train/CHILDREN_00830
0 CHILDREN/train/CHILDREN_00845
0 CHILDREN/train/CHILDREN_00871
0 CHILDREN/train/CHILDREN_00879
0 CHILDREN/train/CHILDREN_00898
0 CHILDREN/train/CHILDREN_00924
0 CHILDREN/train/CHILDREN_00925
0 CHILDREN/train/CHILDREN_00932
0 CHILDREN/train/CHILDREN_00977
0 CHILDREN/train/CHILDREN_00979
0 CHILDREN/train/CHILDREN_00995
0 CHILD/train/CHILD_00037
0 CHILD/train/CHILD_00070
0 CHILD/train/CHILD_00150
0 CHILD/train/CHILD_00172
0 CHILD/train/CHILD_00182
0 CHILD/train/CHILD_00185
0 CHILD/train/CHILD_00235
0 CHILD/train/CHILD_00274
0 CHILD/train/CHILD_00296
0 CHILD/train/CHILD_00297
0 CHILD/train/CHILD_00326
0 CHILD/train/CHILD_00359
0 CHILD/train/CHILD_00389
0 CHILD/train/CHILD_00391
0 CHILD/train/CHILD_00412
0 CHILD/train/CHILD_00448
0 CHILD/train/CHILD_00469
0 CHILD/train/CHILD_00470
0 CHILD/train/CHILD_00479
0 CHILD/train/CHILD_00482
0 CHILD/train/CHILD_00506
0 CHILD/train/CHILD_00510
0 CHILD/train/CHILD_00519
0 CHILD/train/CHILD_00527
0 CHILD/train/CHILD_00536
0 CHILD/train/CHILD_00612
0 CHILD/train/CHILD_00617
0 CHILD/train/CHILD_00629
0 CHILD/train/CHILD_00633
0 CHILD/train/CHILD_00652
0 CHILD/train/CHILD_00653
0 CHILD/train/CHILD_00714
0 CHILD/train/CHILD_00715
0 CHILD/train/CHILD_00727
0 CHILD/train/CHILD_00780
0 CHILD/train/CHILD_00792
0 CHILD/train/CHILD_00815
0 CHILD/train/CHILD_00848
0 CHILD/train/CHILD_00880
0 CHILD/train/CHILD_00882
0 CHILD/val/CHILD_00036
0 CHILD/val/CHILD_00045
0 CHILD/val/CHILD_00049
0 CHINA/test/CHINA_00021
0 CHINA/test/CHINA_00022
0 CHINA/test/CHINA_00040
0 CHINA/train/CHINA_00007
0 CHINA/train/CHINA_00030
0 CHINA/train/CHINA_00064
0 CHINA/train/CHINA_00067
0 CHINA/train/CHINA_00075
0 CHINA/train/CHINA_00091
0 CHINA/train/CHINA_00094
0 CHINA/train/CHINA_00116
0 CHINA/train/CHINA_00118
0 CHINA/train/CHINA_00130
0 CHINA/train/CHINA_00138
0 CHINA/train/CHINA_00148
0 CHINA/train/CHINA_00150
0 CHINA/train/CHINA_00170
0 CHINA/train/CHINA_00200
0 CHINA/train/CHINA_00240
0 CHINA/train/CHINA_00264
0 CHINA/train/CHINA_00344
0 CHINA/train/CHINA_00366
0 CHINA/train/CHINA_00396
0 CHINA/train/CHINA_00404
0 CHINA/train/CHINA_00419
0 CHINA/train/CHINA_00432
0 CHINA/train/CHINA_00486
0 CHINA/train/CHINA_00488
0 CHINA/train/CHINA_00524
0 CHINA/train/CHINA_00536
0 CHINA/train/CHINA_00543
0 CHINA/train/CHINA_00550
0 CHINA/train/CHINA_00563
0 CHINA/train/CHINA_00569
0 CHINA/train/CHINA_00572
0 CHINA/train/CHINA_00593
0 CHINA/train/CHINA_00597
0 CHINA/train/CHINA_00611
0 CHINA/train/CHINA_00615
0 CHINA/train/CHINA_00616
0 CHINA/train/CHINA_00632
0 CHINA/train/CHINA_00640
0 CHINA/train/CHINA_00648
0 CHINA/train/CHINA_00674
0 CHINA/train/CHINA_00694
0 CHINA/train/CHINA_00695
0 CHINA/train/CHINA_00697
0 CHINA/train/CHINA_00712
0 CHINA/train/CHINA_00740
0 CHINA/train/CHINA_00742
0 CHINA/train/CHINA_00745
0 CHINA/train/CHINA_00748
0 CHINA/train/CHINA_00752
0 CHINA/train/CHINA_00779
0 CHINA/train/CHINA_00809
0 CHINA/train/CHINA_00843
0 CHINA/train/CHINA_00845
0 CHINA/train/CHINA_00856
0 CHINA/train/CHINA_00862
0 CHINA/train/CHINA_00900
0 CHINA/train/CHINA_00998
0 CHINA/val/CHINA_00025
0 CHINA/val/CHINA_00030
0 CLAIMS/test/CLAIMS_00034
0 CLAIMS/test/CLAIMS_00050
0 CLAIMS/train/CLAIMS_00002
0 CLAIMS/train/CLAIMS_00012
0 CLAIMS/train/CLAIMS_00014
0 CLAIMS/train/CLAIMS_00017
0 CLAIMS/train/CLAIMS_00034
0 CLAIMS/train/CLAIMS_00042
0 CLAIMS/train/CLAIMS_00059
0 CLAIMS/train/CLAIMS_00066
0 CLAIMS/train/CLAIMS_00084
0 CLAIMS/train/CLAIMS_00095
0 CLAIMS/train/CLAIMS_00107
0 CLAIMS/train/CLAIMS_00112
0 CLAIMS/train/CLAIMS_00119
0 CLAIMS/train/CLAIMS_00125
0 CLAIMS/train/CLAIMS_00138
0 CLAIMS/train/CLAIMS_00139
0 CLAIMS/train/CLAIMS_00140
0 CLAIMS/train/CLAIMS_00154
0 CLAIMS/train/CLAIMS_00195
0 CLAIMS/train/CLAIMS_00197
0 CLAIMS/train/CLAIMS_00201
0 CLAIMS/train/CLAIMS_00216
0 CLAIMS/train/CLAIMS_00225
0 CLAIMS/train/CLAIMS_00255
0 CLAIMS/train/CLAIMS_00259
0 CLAIMS/train/CLAIMS_00267
0 CLAIMS/train/CLAIMS_00275
0 CLAIMS/train/CLAIMS_00280
0 CLAIMS/train/CLAIMS_00285
0 CLAIMS/train/CLAIMS_00297
0 CLAIMS/train/CLAIMS_00302
0 CLAIMS/train/CLAIMS_00307
0 CLAIMS/train/CLAIMS_00320
0 CLAIMS/train/CLAIMS_00334
0 CLAIMS/train/CLAIMS_00348
0 CLAIMS/train/CLAIMS_00350
0 CLAIMS/train/CLAIMS_00356
0 CLAIMS/train/CLAIMS_00377
0 CLAIMS/train/CLAIMS_00391
0 CLAIMS/train/CLAIMS_00392
0 CLAIMS/train/CLAIMS_00395
0 CLAIMS/train/CLAIMS_00396
0 CLAIMS/train/CLAIMS_00403
0 CLAIMS/train/CLAIMS_00404
0 CLAIMS/train/CLAIMS_00410
0 CLAIMS/train/CLAIMS_00412
0 CLAIMS/train/CLAIMS_00413
0 CLAIMS/train/CLAIMS_00414
0 CLAIMS/train/CLAIMS_00419
0 CLAIMS/train/CLAIMS_00425
0 CLAIMS/train/CLAIMS_00429
0 CLAIMS/train/CLAIMS_00445
0 CLAIMS/train/CLAIMS_00476
0 CLAIMS/train/CLAIMS_00477
0 CLAIMS/train/CLAIMS_00479
0 CLAIMS/train/CLAIMS_00497
0 CLAIMS/train/CLAIMS_00499
0 CLAIMS/train/CLAIMS_00507
0 CLAIMS/train/CLAIMS_00519
0 CLAIMS/train/CLAIMS_00520
0 CLAIMS/train/CLAIMS_00523
0 CLAIMS/train/CLAIMS_00528
0 CLAIMS/train/CLAIMS_00560
0 CLAIMS/train/CLAIMS_00567
0 CLAIMS/train/CLAIMS_00570
0 CLAIMS/train/CLAIMS_00588
0 CLAIMS/train/CLAIMS_00602
0 CLAIMS/train/CLAIMS_00607
0 CLAIMS/train/CLAIMS_00608
0 CLAIMS/train/CLAIMS_00612
0 CLAIMS/train/CLAIMS_00615
0 CLAIMS/train/CLAIMS_00621
0 CLAIMS/train/CLAIMS_00627
0 CLAIMS/train/CLAIMS_00633
0 CLAIMS/train/CLAIMS_00635
0 CLAIMS/train/CLAIMS_00647
0 CLAIMS/train/CLAIMS_00664
0 CLAIMS/train/CLAIMS_00669
0 CLAIMS/train/CLAIMS_00699
0 CLAIMS/train/CLAIMS_00718
0 CLAIMS/train/CLAIMS_00726
0 CLAIMS/train/CLAIMS_00731
0 CLAIMS/train/CLAIMS_00761
0 CLAIMS/train/CLAIMS_00770
0 CLAIMS/train/CLAIMS_00773
0 CLAIMS/train/CLAIMS_00777
0 CLAIMS/train/CLAIMS_00780
0 CLAIMS/train/CLAIMS_00784
0 CLAIMS/train/CLAIMS_00793
0 CLAIMS/train/CLAIMS_00794
0 CLAIMS/train/CLAIMS_00795
0 CLAIMS/train/CLAIMS_00848
0 CLAIMS/train/CLAIMS_00854
0 CLAIMS/train/CLAIMS_00862
0 CLAIMS/train/CLAIMS_00863
0 CLAIMS/train/CLAIMS_00884
0 CLAIMS/train/CLAIMS_00886
0 CLAIMS/val/CLAIMS_00043
0 CLEAR/train/CLEAR_00056
0 CLEAR/train/CLEAR_00090
0 CLEAR/train/CLEAR_00093
0 CLEAR/train/CLEAR_00144
0 CLEAR/train/CLEAR_00211
0 CLEAR/train/CLEAR_00703
0 CLEAR/train/CLEAR_00710
0 CLEAR/train/CLEAR_00802
0 CLEAR/train/CLEAR_00842
0 CLEAR/train/CLEAR_00934
0 CLOSE/test/CLOSE_00042
0 CLOSE/train/CLOSE_00167
0 CLOSE/train/CLOSE_00231
0 CLOSE/train/CLOSE_00245
0 CLOSE/train/CLOSE_00253
0 CLOSE/train/CLOSE_00254
0 CLOSE/train/CLOSE_00350
0 CLOSE/train/CLOSE_00354
0 CLOSE/train/CLOSE_00483
0 CLOSE/train/CLOSE_00638
0 CLOSE/train/CLOSE_00672
0 CLOSE/train/CLOSE_00692
0 CLOSE/train/CLOSE_00749
0 CLOSE/train/CLOSE_00774
0 CLOSE/train/CLOSE_00814
0 CLOSE/train/CLOSE_00882
0 CLOSE/train/CLOSE_00917
0 CLOSE/val/CLOSE_00003
0 CLOUD/train/CLOUD_00519
0 CLOUD/train/CLOUD_00705
0 COMES/train/COMES_00043
0 COMES/train/COMES_00316
0 COMES/train/COMES_00358
0 COMES/train/COMES_00747
0 COMES/train/COMES_00925
0 COMES/train/COMES_00948
0 COMES/train/COMES_00951
0 COMING/test/COMING_00020
0 COMING/test/COMING_00029
0 COMING/test/COMING_00044
0 COMING/train/COMING_00026
0 COMING/train/COMING_00034
0 COMING/train/COMING_00093
0 COMING/train/COMING_00118
0 COMING/train/COMING_00128
0 COMING/train/COMING_00170
0 COMING/train/COMING_00224
0 COMING/train/COMING_00237
0 COMING/train/COMING_00292
0 COMING/train/COMING_00360
0 COMING/train/COMING_00454
0 COMING/train/COMING_00465
0 COMING/train/COMING_00504
0 COMING/train/COMING_00586
0 COMING/train/COMING_00642
0 COMING/train/COMING_00811
0 COMING/train/COMING_00999
0 COMING/val/COMING_00024
0 COMMUNITY/test/COMMUNITY_00042
0 COMMUNITY/train/COMMUNITY_00046
0 COMMUNITY/train/COMMUNITY_00180
0 COMMUNITY/train/COMMUNITY_00197
0 COMMUNITY/train/COMMUNITY_00283
0 COMMUNITY/train/COMMUNITY_00485
0 COMMUNITY/train/COMMUNITY_00530
0 COMMUNITY/train/COMMUNITY_00568
0 COMMUNITY/train/COMMUNITY_00589
0 COMMUNITY/train/COMMUNITY_00600
0 COMMUNITY/train/COMMUNITY_00691
0 COMMUNITY/train/COMMUNITY_00736
0 COMMUNITY/train/COMMUNITY_00757
0 COMMUNITY/train/COMMUNITY_00759
0 COMMUNITY/train/COMMUNITY_00845
0 COMMUNITY/train/COMMUNITY_00867
0 COMMUNITY/train/COMMUNITY_00877
0 COMMUNITY/train/COMMUNITY_00879
0 COMMUNITY/train/COMMUNITY_00968
0 COMMUNITY/train/COMMUNITY_00998
0 COMMUNITY/train/COMMUNITY_00999
0 COMPANIES/test/COMPANIES_00004
0 COMPANIES/train/COMPANIES_00018
0 COMPANIES/train/COMPANIES_00088
0 COMPANIES/train/COMPANIES_00157
0 COMPANIES/train/COMPANIES_00208
0 COMPANIES/train/COMPANIES_00239
0 COMPANIES/train/COMPANIES_00252
0 COMPANIES/train/COMPANIES_00271
0 COMPANIES/train/COMPANIES_00336
0 COMPANIES/train/COMPANIES_00365
0 COMPANIES/train/COMPANIES_00435
0 COMPANIES/train/COMPANIES_00436
0 COMPANIES/train/COMPANIES_00438
0 COMPANIES/train/COMPANIES_00512
0 COMPANIES/train/COMPANIES_00514
0 COMPANIES/train/COMPANIES_00520
0 COMPANIES/train/COMPANIES_00536
0 COMPANIES/train/COMPANIES_00537
0 COMPANIES/train/COMPANIES_00627
0 COMPANIES/train/COMPANIES_00631
0 COMPANIES/train/COMPANIES_00637
0 COMPANIES/train/COMPANIES_00694
0 COMPANIES/train/COMPANIES_00719
0 COMPANIES/train/COMPANIES_00759
0 COMPANIES/train/COMPANIES_00762
0 COMPANIES/train/COMPANIES_00788
0 COMPANIES/train/COMPANIES_00832
0 COMPANIES/train/COMPANIES_00849
0 COMPANIES/train/COMPANIES_00902
0 COMPANIES/train/COMPANIES_00923
0 COMPANIES/train/COMPANIES_00952
0 COMPANIES/train/COMPANIES_00959
0 COMPANIES/train/COMPANIES_00967
0 COMPANY/test/COMPANY_00015
0 COMPANY/train/COMPANY_00024
0 COMPANY/train/COMPANY_00035
0 COMPANY/train/COMPANY_00039
0 COMPANY/train/COMPANY_00085
0 COMPANY/train/COMPANY_00119
0 COMPANY/train/COMPANY_00123
0 COMPANY/train/COMPANY_00182
0 COMPANY/train/COMPANY_00202
0 COMPANY/train/COMPANY_00215
0 COMPANY/train/COMPANY_00241
0 COMPANY/train/COMPANY_00298
0 COMPANY/train/COMPANY_00322
0 COMPANY/train/COMPANY_00327
0 COMPANY/train/COMPANY_00328
0 COMPANY/train/COMPANY_00338
0 COMPANY/train/COMPANY_00355
0 COMPANY/train/COMPANY_00361
0 COMPANY/train/COMPANY_00397
0 COMPANY/train/COMPANY_00408
0 COMPANY/train/COMPANY_00463
0 COMPANY/train/COMPANY_00468
0 COMPANY/train/COMPANY_00475
0 COMPANY/train/COMPANY_00486
0 COMPANY/train/COMPANY_00532
0 COMPANY/train/COMPANY_00561
0 COMPANY/train/COMPANY_00610
0 COMPANY/train/COMPANY_00636
0 COMPANY/train/COMPANY_00662
0 COMPANY/train/COMPANY_00672
0 COMPANY/train/COMPANY_00675
0 COMPANY/train/COMPANY_00695
0 COMPANY/train/COMPANY_00732
0 COMPANY/train/COMPANY_00752
0 COMPANY/train/COMPANY_00791
0 COMPANY/train/COMPANY_00811
0 COMPANY/train/COMPANY_00827
0 COMPANY/train/COMPANY_00833
0 COMPANY/train/COMPANY_00846
0 COMPANY/train/COMPANY_00914
0 COMPANY/train/COMPANY_00929
0 COMPANY/train/COMPANY_00933
0 COMPANY/train/COMPANY_00937
0 COMPANY/train/COMPANY_00957
0 COMPANY/train/COMPANY_00980
0 COMPANY/val/COMPANY_00011
0 COMPANY/val/COMPANY_00028
0 COMPANY/val/COMPANY_00029
0 CONCERNS/test/CONCERNS_00004
0 CONCERNS/test/CONCERNS_00019
0 CONCERNS/test/CONCERNS_00045
0 CONCERNS/train/CONCERNS_00002
0 CONCERNS/train/CONCERNS_00036
0 CONCERNS/train/CONCERNS_00051
0 CONCERNS/train/CONCERNS_00055
0 CONCERNS/train/CONCERNS_00105
0 CONCERNS/train/CONCERNS_00110
0 CONCERNS/train/CONCERNS_00123
0 CONCERNS/train/CONCERNS_00128
0 CONCERNS/train/CONCERNS_00140
0 CONCERNS/train/CONCERNS_00152
0 CONCERNS/train/CONCERNS_00158
0 CONCERNS/train/CONCERNS_00161
0 CONCERNS/train/CONCERNS_00169
0 CONCERNS/train/CONCERNS_00211
0 CONCERNS/train/CONCERNS_00226
0 CONCERNS/train/CONCERNS_00234
0 CONCERNS/train/CONCERNS_00254
0 CONCERNS/train/CONCERNS_00261
0 CONCERNS/train/CONCERNS_00264
0 CONCERNS/train/CONCERNS_00292
0 CONCERNS/train/CONCERNS_00308
0 CONCERNS/train/CONCERNS_00317
0 CONCERNS/train/CONCERNS_00319
0 CONCERNS/train/CONCERNS_00320
0 CONCERNS/train/CONCERNS_00454
0 CONCERNS/train/CONCERNS_00457
0 CONCERNS/train/CONCERNS_00458
0 CONCERNS/train/CONCERNS_00483
0 CONCERNS/train/CONCERNS_00502
0 CONCERNS/train/CONCERNS_00505
0 CONCERNS/train/CONCERNS_00519
0 CONCERNS/train/CONCERNS_00550
0 CONCERNS/train/CONCERNS_00583
0 CONCERNS/train/CONCERNS_00615
0 CONCERNS/train/CONCERNS_00616
0 CONCERNS/train/CONCERNS_00636
0 CONCERNS/train/CONCERNS_00667
0 CONCERNS/train/CONCERNS_00677
0 CONCERNS/train/CONCERNS_00705
0 CONCERNS/train/CONCERNS_00734
0 CONCERNS/train/CONCERNS_00767
0 CONCERNS/train/CONCERNS_00792
0 CONCERNS/train/CONCERNS_00801
0 CONCERNS/train/CONCERNS_00818
0 CONCERNS/train/CONCERNS_00832
0 CONCERNS/train/CONCERNS_00839
0 CONCERNS/train/CONCERNS_00845
0 CONCERNS/train/CONCERNS_00858
0 CONCERNS/train/CONCERNS_00863
0 CONCERNS/val/CONCERNS_00008
0 CONCERNS/val/CONCERNS_00024
0 CONCERNS/val/CONCERNS_00047
0 CONFERENCE/train/CONFERENCE_00002
0 CONFERENCE/train/CONFERENCE_00054
0 CONFERENCE/train/CONFERENCE_00085
0 CONFERENCE/train/CONFERENCE_00090
0 CONFERENCE/train/CONFERENCE_00124
0 CONFERENCE/train/CONFERENCE_00135
0 CONFERENCE/train/CONFERENCE_00150
0 CONFERENCE/train/CONFERENCE_00160
0 CONFERENCE/train/CONFERENCE_00177
0 CONFERENCE/train/CONFERENCE_00183
0 CONFERENCE/train/CONFERENCE_00187
0 CONFERENCE/train/CONFERENCE_00223
0 CONFERENCE/train/CONFERENCE_00235
0 CONFERENCE/train/CONFERENCE_00236
0 CONFERENCE/train/CONFERENCE_00242
0 CONFERENCE/train/CONFERENCE_00262
0 CONFERENCE/train/CONFERENCE_00274
0 CONFERENCE/train/CONFERENCE_00297
0 CONFERENCE/train/CONFERENCE_00307
0 CONFERENCE/train/CONFERENCE_00323
0 CONFERENCE/train/CONFERENCE_00331
0 CONFERENCE/train/CONFERENCE_00351
0 CONFERENCE/train/CONFERENCE_00363
0 CONFERENCE/train/CONFERENCE_00391
0 CONFERENCE/train/CONFERENCE_00405
0 CONFERENCE/train/CONFERENCE_00410
0 CONFERENCE/train/CONFERENCE_00434
0 CONFERENCE/train/CONFERENCE_00452
0 CONFERENCE/train/CONFERENCE_00459
0 CONFERENCE/train/CONFERENCE_00467
0 CONFERENCE/train/CONFERENCE_00471
0 CONFERENCE/train/CONFERENCE_00476
0 CONFERENCE/train/CONFERENCE_00529
0 CONFERENCE/train/CONFERENCE_00536
0 CONFERENCE/train/CONFERENCE_00551
0 CONFERENCE/train/CONFERENCE_00553
0 CONFERENCE/train/CONFERENCE_00623
0 CONFERENCE/train/CONFERENCE_00632
0 CONFERENCE/train/CONFERENCE_00658
0 CONFERENCE/train/CONFERENCE_00661
0 CONFERENCE/train/CONFERENCE_00699
0 CONFERENCE/train/CONFERENCE_00810
0 CONFERENCE/train/CONFERENCE_00819
0 CONFERENCE/val/CONFERENCE_00014
0 CONFERENCE/val/CONFERENCE_00042
0 CONFLICT/test/CONFLICT_00015
0 CONFLICT/test/CONFLICT_00019
0 CONFLICT/test/CONFLICT_00035
0 CONFLICT/train/CONFLICT_00009
0 CONFLICT/train/CONFLICT_00020
0 CONFLICT/train/CONFLICT_00021
0 CONFLICT/train/CONFLICT_00064
0 CONFLICT/train/CONFLICT_00114
0 CONFLICT/train/CONFLICT_00133
0 CONFLICT/train/CONFLICT_00155
0 CONFLICT/train/CONFLICT_00212
0 CONFLICT/train/CONFLICT_00248
0 CONFLICT/train/CONFLICT_00252
0 CONFLICT/train/CONFLICT_00275
0 CONFLICT/train/CONFLICT_00292
0 CONFLICT/train/CONFLICT_00297
0 CONFLICT/train/CONFLICT_00329
0 CONFLICT/train/CONFLICT_00348
0 CONFLICT/train/CONFLICT_00402
0 CONFLICT/train/CONFLICT_00431
0 CONFLICT/train/CONFLICT_00439
0 CONFLICT/train/CONFLICT_00453
0 CONFLICT/train/CONFLICT_00472
0 CONFLICT/train/CONFLICT_00492
0 CONFLICT/train/CONFLICT_00494
0 CONFLICT/train/CONFLICT_00539
0 CONFLICT/train/CONFLICT_00560
0 CONFLICT/train/CONFLICT_00571
0 CONFLICT/train/CONFLICT_00572
0 CONFLICT/train/CONFLICT_00575
0 CONFLICT/train/CONFLICT_00582
0 CONFLICT/train/CONFLICT_00619
0 CONFLICT/train/CONFLICT_00627
0 CONFLICT/train/CONFLICT_00630
0 CONFLICT/train/CONFLICT_00634
0 CONFLICT/train/CONFLICT_00651
0 CONFLICT/train/CONFLICT_00673
0 CONFLICT/train/CONFLICT_00684
0 CONFLICT/train/CONFLICT_00707
0 CONFLICT/train/CONFLICT_00713
0 CONFLICT/train/CONFLICT_00720
0 CONFLICT/train/CONFLICT_00725
0 CONFLICT/train/CONFLICT_00754
0 CONFLICT/train/CONFLICT_00789
0 CONFLICT/train/CONFLICT_00841
0 CONFLICT/train/CONFLICT_00847
0 CONFLICT/train/CONFLICT_00855
0 CONFLICT/train/CONFLICT_00866
0 CONFLICT/train/CONFLICT_00884
0 CONFLICT/train/CONFLICT_00886
0 CONFLICT/train/CONFLICT_00909
0 CONFLICT/train/CONFLICT_00911
0 CONFLICT/train/CONFLICT_00913
0 CONFLICT/val/CONFLICT_00003
0 CONFLICT/val/CONFLICT_00034
0 CONFLICT/val/CONFLICT_00039
0 CONSERVATIVE/test/CONSERVATIVE_00006
0 CONSERVATIVE/train/CONSERVATIVE_00018
0 CONSERVATIVE/train/CONSERVATIVE_00025
0 CONSERVATIVE/train/CONSERVATIVE_00079
0 CONSERVATIVE/train/CONSERVATIVE_00098
0 CONSERVATIVE/train/CONSERVATIVE_00118
0 CONSERVATIVE/train/CONSERVATIVE_00123
0 CONSERVATIVE/train/CONSERVATIVE_00145
0 CONSERVATIVE/train/CONSERVATIVE_00157
0 CONSERVATIVE/train/CONSERVATIVE_00202
0 CONSERVATIVE/train/CONSERVATIVE_00203
0 CONSERVATIVE/train/CONSERVATIVE_00226
0 CONSERVATIVE/train/CONSERVATIVE_00227
0 CONSERVATIVE/train/CONSERVATIVE_00228
0 CONSERVATIVE/train/CONSERVATIVE_00229
0 CONSERVATIVE/train/CONSERVATIVE_00233
0 CONSERVATIVE/train/CONSERVATIVE_00260
0 CONSERVATIVE/train/CONSERVATIVE_00278
0 CONSERVATIVE/train/CONSERVATIVE_00284
0 CONSERVATIVE/train/CONSERVATIVE_00304
0 CONSERVATIVE/train/CONSERVATIVE_00310
0 CONSERVATIVE/train/CONSERVATIVE_00338
0 CONSERVATIVE/train/CONSERVATIVE_00361
0 CONSERVATIVE/train/CONSERVATIVE_00394
0 CONSERVATIVE/train/CONSERVATIVE_00398
0 CONSERVATIVE/train/CONSERVATIVE_00399
0 CONSERVATIVE/train/CONSERVATIVE_00413
0 CONSERVATIVE/train/CONSERVATIVE_00414
0 CONSERVATIVE/train/CONSERVATIVE_00421
0 CONSERVATIVE/train/CONSERVATIVE_00422
0 CONSERVATIVE/train/CONSERVATIVE_00424
0 CONSERVATIVE/train/CONSERVATIVE_00439
0 CONSERVATIVE/train/CONSERVATIVE_00459
0 CONSERVATIVE/train/CONSERVATIVE_00473
0 CONSERVATIVE/train/CONSERVATIVE_00516
0 CONSERVATIVE/train/CONSERVATIVE_00530
0 CONSERVATIVE/train/CONSERVATIVE_00535
0 CONSERVATIVE/train/CONSERVATIVE_00542
0 CONSERVATIVE/train/CONSERVATIVE_00597
0 CONSERVATIVE/train/CONSERVATIVE_00623
0 CONSERVATIVE/train/CONSERVATIVE_00625
0 CONSERVATIVE/train/CONSERVATIVE_00638
0 CONSERVATIVE/train/CONSERVATIVE_00641
0 CONSERVATIVE/train/CONSERVATIVE_00667
0 CONSERVATIVE/train/CONSERVATIVE_00675
0 CONSERVATIVE/train/CONSERVATIVE_00710
0 CONSERVATIVE/train/CONSERVATIVE_00711
0 CONSERVATIVE/train/CONSERVATIVE_00741
0 CONSERVATIVE/train/CONSERVATIVE_00752
0 CONSERVATIVE/train/CONSERVATIVE_00761
0 CONSERVATIVE/train/CONSERVATIVE_00765
0 CONSERVATIVE/train/CONSERVATIVE_00768
0 CONSERVATIVE/train/CONSERVATIVE_00773
0 CONSERVATIVE/train/CONSERVATIVE_00786
0 CONSERVATIVE/train/CONSERVATIVE_00788
0 CONSERVATIVE/train/CONSERVATIVE_00801
0 CONSERVATIVE/train/CONSERVATIVE_00841
0 CONSERVATIVE/train/CONSERVATIVE_00848
0 CONSERVATIVE/train/CONSERVATIVE_00856
0 CONSERVATIVE/train/CONSERVATIVE_00858
0 CONSERVATIVE/train/CONSERVATIVE_00865
0 CONSERVATIVE/train/CONSERVATIVE_00876
0 CONSERVATIVE/train/CONSERVATIVE_00889
0 CONSERVATIVE/train/CONSERVATIVE_00919
0 CONSERVATIVE/train/CONSERVATIVE_00920
0 CONSERVATIVE/train/CONSERVATIVE_00921
0 CONSERVATIVE/train/CONSERVATIVE_00937
0 CONSERVATIVE/train/CONSERVATIVE_00951
0 CONSERVATIVE/train/CONSERVATIVE_00958
0 CONSERVATIVE/train/CONSERVATIVE_00974
0 CONSERVATIVE/train/CONSERVATIVE_00976
0 CONSERVATIVE/train/CONSERVATIVE_00996
0 CONSERVATIVE/train/CONSERVATIVE_00997
0 CONSERVATIVE/val/CONSERVATIVE_00018
0 CONSERVATIVE/val/CONSERVATIVE_00029
0 CONSERVATIVE/val/CONSERVATIVE_00032
0 CONTINUE/train/CONTINUE_00024
0 CONTINUE/train/CONTINUE_00100
0 CONTINUE/train/CONTINUE_00143
0 CONTINUE/train/CONTINUE_00333
0 CONTINUE/train/CONTINUE_00385
0 CONTINUE/train/CONTINUE_00399
0 CONTINUE/train/CONTINUE_00476
0 CONTINUE/train/CONTINUE_00491
0 CONTINUE/train/CONTINUE_00499
0 CONTINUE/train/CONTINUE_00518
0 CONTINUE/train/CONTINUE_00645
0 CONTINUE/train/CONTINUE_00648
0 CONTINUE/train/CONTINUE_00655
0 CONTINUE/train/CONTINUE_00684
0 CONTINUE/train/CONTINUE_00739
0 CONTINUE/train/CONTINUE_00838
0 CONTINUE/train/CONTINUE_00873
0 CONTINUE/train/CONTINUE_00912
0 CONTINUE/train/CONTINUE_00918
0 CONTINUE/train/CONTINUE_00966
0 CONTINUE/val/CONTINUE_00038
0 CONTROL/train/CONTROL_00067
0 CONTROL/train/CONTROL_00102
0 CONTROL/train/CONTROL_00134
0 CONTROL/train/CONTROL_00151
0 CONTROL/train/CONTROL_00158
0 CONTROL/train/CONTROL_00181
0 CONTROL/train/CONTROL_00183
0 CONTROL/train/CONTROL_00214
0 CONTROL/train/CONTROL_00247
0 CONTROL/train/CONTROL_00280
0 CONTROL/train/CONTROL_00289
0 CONTROL/train/CONTROL_00294
0 CONTROL/train/CONTROL_00310
0 CONTROL/train/CONTROL_00339
0 CONTROL/train/CONTROL_00376
0 CONTROL/train/CONTROL_00399
0 CONTROL/train/CONTROL_00401
0 CONTROL/train/CONTROL_00404
0 CONTROL/train/CONTROL_00409
0 CONTROL/train/CONTROL_00433
0 CONTROL/train/CONTROL_00436
0 CONTROL/train/CONTROL_00462
0 CONTROL/train/CONTROL_00480
0 CONTROL/train/CONTROL_00584
0 CONTROL/train/CONTROL_00589
0 CONTROL/train/CONTROL_00605
0 CONTROL/train/CONTROL_00624
0 CONTROL/train/CONTROL_00633
0 CONTROL/train/CONTROL_00653
0 CONTROL/train/CONTROL_00691
0 CONTROL/train/CONTROL_00740
0 CONTROL/train/CONTROL_00784
0 CONTROL/train/CONTROL_00830
0 CONTROL/train/CONTROL_00849
0 CONTROL/train/CONTROL_00906
0 CONTROL/train/CONTROL_00926
0 CONTROL/train/CONTROL_00966
0 CONTROL/train/CONTROL_00975
0 CONTROL/train/CONTROL_00997
0 CONTROL/val/CONTROL_00013
0 COULD/train/COULD_00012
0 COULD/train/COULD_00027
0 COULD/train/COULD_00088
0 COULD/train/COULD_00132
0 COULD/train/COULD_00174
0 COULD/train/COULD_00207
0 COULD/train/COULD_00216
0 COULD/train/COULD_00220
0 COULD/train/COULD_00239
0 COULD/train/COULD_00242
0 COULD/train/COULD_00267
0 COULD/train/COULD_00271
0 COULD/train/COULD_00287
0 COULD/train/COULD_00289
0 COULD/train/COULD_00291
0 COULD/train/COULD_00345
0 COULD/train/COULD_00353
0 COULD/train/COULD_00426
0 COULD/train/COULD_00428
0 COULD/train/COULD_00436
0 COULD/train/COULD_00459
0 COULD/train/COULD_00514
0 COULD/train/COULD_00546
0 COULD/train/COULD_00624
0 COULD/train/COULD_00642
0 COULD/train/COULD_00649
0 COULD/train/COULD_00654
0 COULD/train/COULD_00666
0 COULD/train/COULD_00676
0 COULD/train/COULD_00685
0 COULD/train/COULD_00737
0 COULD/train/COULD_00748
0 COULD/train/COULD_00753
0 COULD/train/COULD_00754
0 COULD/train/COULD_00772
0 COULD/train/COULD_00817
0 COULD/train/COULD_00827
0 COULD/train/COULD_00828
0 COULD/train/COULD_00858
0 COULD/train/COULD_00894
0 COULD/train/COULD_00916
0 COULD/train/COULD_00927
0 COULD/train/COULD_00954
0 COULD/train/COULD_00957
0 COULD/val/COULD_00019
0 COUNCIL/test/COUNCIL_00026
0 COUNCIL/test/COUNCIL_00027
0 COUNCIL/test/COUNCIL_00049
0 COUNCIL/train/COUNCIL_00014
0 COUNCIL/train/COUNCIL_00133
0 COUNCIL/train/COUNCIL_00142
0 COUNCIL/train/COUNCIL_00159
0 COUNCIL/train/COUNCIL_00173
0 COUNCIL/train/COUNCIL_00242
0 COUNCIL/train/COUNCIL_00249
0 COUNCIL/train/COUNCIL_00287
0 COUNCIL/train/COUNCIL_00297
0 COUNCIL/train/COUNCIL_00303
0 COUNCIL/train/COUNCIL_00326
0 COUNCIL/train/COUNCIL_00339
0 COUNCIL/train/COUNCIL_00355
0 COUNCIL/train/COUNCIL_00414
0 COUNCIL/train/COUNCIL_00427
0 COUNCIL/train/COUNCIL_00445
0 COUNCIL/train/COUNCIL_00479
0 COUNCIL/train/COUNCIL_00506
0 COUNCIL/train/COUNCIL_00509
0 COUNCIL/train/COUNCIL_00511
0 COUNCIL/train/COUNCIL_00527
0 COUNCIL/train/COUNCIL_00544
0 COUNCIL/train/COUNCIL_00546
0 COUNCIL/train/COUNCIL_00550
0 COUNCIL/train/COUNCIL_00601
0 COUNCIL/train/COUNCIL_00608
0 COUNCIL/train/COUNCIL_00610
0 COUNCIL/train/COUNCIL_00614
0 COUNCIL/train/COUNCIL_00617
0 COUNCIL/train/COUNCIL_00623
0 COUNCIL/train/COUNCIL_00643
0 COUNCIL/train/COUNCIL_00663
0 COUNCIL/train/COUNCIL_00781
0 COUNCIL/train/COUNCIL_00802
0 COUNCIL/train/COUNCIL_00810
0 COUNCIL/train/COUNCIL_00826
0 COUNCIL/train/COUNCIL_00876
0 COUNCIL/train/COUNCIL_00882
0 COUNCIL/train/COUNCIL_00890
0 COUNCIL/train/COUNCIL_00923
0 COUNCIL/train/COUNCIL_00969
0 COUNCIL/train/COUNCIL_00997
0 COUNTRIES/train/COUNTRIES_00041
0 COUNTRIES/train/COUNTRIES_00058
0 COUNTRIES/train/COUNTRIES_00126
0 COUNTRIES/train/COUNTRIES_00148
0 COUNTRIES/train/COUNTRIES_00199
0 COUNTRIES/train/COUNTRIES_00221
0 COUNTRIES/train/COUNTRIES_00247
0 COUNTRIES/train/COUNTRIES_00322
0 COUNTRIES/train/COUNTRIES_00447
0 COUNTRIES/train/COUNTRIES_00455
0 COUNTRIES/train/COUNTRIES_00512
0 COUNTRIES/train/COUNTRIES_00561
0 COUNTRIES/train/COUNTRIES_00624
0 COUNTRIES/train/COUNTRIES_00676
0 COUNTRIES/train/COUNTRIES_00698
0 COUNTRIES/train/COUNTRIES_00702
0 COUNTRIES/train/COUNTRIES_00742
0 COUNTRIES/train/COUNTRIES_00770
0 COUNTRIES/train/COUNTRIES_00868
0 COUNTRIES/train/COUNTRIES_00884
0 COUNTRIES/train/COUNTRIES_00893
0 COUNTRIES/train/COUNTRIES_00982
0 COUNTRIES/val/COUNTRIES_00036
0 COUNTRY/test/COUNTRY_00020
0 COUNTRY/test/COUNTRY_00026
0 COUNTRY/test/COUNTRY_00039
0 COUNTRY/test/COUNTRY_00043
0 COUNTRY/train/COUNTRY_00042
0 COUNTRY/train/COUNTRY_00143
0 COUNTRY/train/COUNTRY_00161
0 COUNTRY/train/COUNTRY_00193
0 COUNTRY/train/COUNTRY_00251
0 COUNTRY/train/COUNTRY_00288
0 COUNTRY/train/COUNTRY_00354
0 COUNTRY/train/COUNTRY_00395
0 COUNTRY/train/COUNTRY_00409
0 COUNTRY/train/COUNTRY_00456
0 COUNTRY/train/COUNTRY_00477
0 COUNTRY/train/COUNTRY_00521
0 COUNTRY/train/COUNTRY_00570
0 COUNTRY/train/COUNTRY_00571
0 COUNTRY/train/COUNTRY_00597
0 COUNTRY/train/COUNTRY_00616
0 COUNTRY/train/COUNTRY_00678
0 COUNTRY/train/COUNTRY_00737
0 COUNTRY/train/COUNTRY_00969
0 COUNTRY/val/COUNTRY_00008
0 COUNTRY/val/COUNTRY_00040
0 COUNTRY/val/COUNTRY_00043
0 COUNTRY/val/COUNTRY_00050
0 COUPLE/train/COUPLE_00007
0 COUPLE/train/COUPLE_00046
0 COUPLE/train/COUPLE_00065
0 COUPLE/train/COUPLE_00274
0 COUPLE/train/COUPLE_00339
0 COUPLE/train/COUPLE_00361
0 COUPLE/train/COUPLE_00376
0 COUPLE/train/COUPLE_00407
0 COUPLE/train/COUPLE_00433
0 COUPLE/train/COUPLE_00434
0 COUPLE/train/COUPLE_00567
0 COUPLE/train/COUPLE_00599
0 COUPLE/train/COUPLE_00631
0 COUPLE/train/COUPLE_00666
0 COUPLE/train/COUPLE_00801
0 COUPLE/train/COUPLE_00853
0 COUPLE/train/COUPLE_00938
0 COURSE/train/COURSE_00033
0 COURSE/train/COURSE_00228
0 COURSE/train/COURSE_00355
0 COURSE/train/COURSE_00496
0 COURSE/train/COURSE_00541
0 COURSE/train/COURSE_00681
0 COURSE/train/COURSE_00814
0 COURSE/val/COURSE_00042
0 COURSE/val/COURSE_00047
0 COURT/test/COURT_00028
0 COURT/test/COURT_00029
0 COURT/train/COURT_00014
0 COURT/train/COURT_00016
0 COURT/train/COURT_00079
0 COURT/train/COURT_00101
0 COURT/train/COURT_00104
0 COURT/train/COURT_00117
0 COURT/train/COURT_00149
0 COURT/train/COURT_00165
0 COURT/train/COURT_00214
0 COURT/train/COURT_00221
0 COURT/train/COURT_00235
0 COURT/train/COURT_00330
0 COURT/train/COURT_00373
0 COURT/train/COURT_00377
0 COURT/train/COURT_00423
0 COURT/train/COURT_00445
0 COURT/train/COURT_00493
0 COURT/train/COURT_00517
0 COURT/train/COURT_00573
0 COURT/train/COURT_00577
0 COURT/train/COURT_00596
0 COURT/train/COURT_00607
0 COURT/train/COURT_00620
0 COURT/train/COURT_00660
0 COURT/train/COURT_00674
0 COURT/train/COURT_00683
0 COURT/train/COURT_00709
0 COURT/train/COURT_00729
0 COURT/train/COURT_00744
0 COURT/train/COURT_00766
0 COURT/train/COURT_00795
0 COURT/train/COURT_00796
0 COURT/train/COURT_00823
0 COURT/train/COURT_00830
0 COURT/train/COURT_00834
0 COURT/train/COURT_00858
0 COURT/train/COURT_00877
0 COURT/train/COURT_00905
0 COURT/train/COURT_00930
0 COURT/val/COURT_00028
0 CRIME/train/CRIME_00082
0 CRIME/train/CRIME_00109
0 CRIME/train/CRIME_00114
0 CRIME/train/CRIME_00273
0 CRIME/train/CRIME_00336
0 CRIME/train/CRIME_00377
0 CRIME/train/CRIME_00397
0 CRIME/train/CRIME_00409
0 CRIME/train/CRIME_00444
0 CRIME/train/CRIME_00468
0 CRIME/train/CRIME_00514
0 CRIME/train/CRIME_00529
0 CRIME/train/CRIME_00539
0 CRIME/train/CRIME_00607
0 CRIME/train/CRIME_00626
0 CRIME/train/CRIME_00664
0 CRIME/train/CRIME_00672
0 CRIME/train/CRIME_00698
0 CRIME/train/CRIME_00733
0 CRIME/train/CRIME_00796
0 CRIME/train/CRIME_00816
0 CRIME/train/CRIME_00878
0 CRIME/train/CRIME_00911
0 CRIME/train/CRIME_00912
0 CRIME/train/CRIME_00924
0 CRIME/train/CRIME_00989
0 CRIME/val/CRIME_00033
0 CRISIS/test/CRISIS_00028
0 CRISIS/train/CRISIS_00010
0 CRISIS/train/CRISIS_00026
0 CRISIS/train/CRISIS_00030
0 CRISIS/train/CRISIS_00044
0 CRISIS/train/CRISIS_00056
0 CRISIS/train/CRISIS_00088
0 CRISIS/train/CRISIS_00148
0 CRISIS/train/CRISIS_00159
0 CRISIS/train/CRISIS_00183
0 CRISIS/train/CRISIS_00202
0 CRISIS/train/CRISIS_00226
0 CRISIS/train/CRISIS_00230
0 CRISIS/train/CRISIS_00278
0 CRISIS/train/CRISIS_00279
0 CRISIS/train/CRISIS_00286
0 CRISIS/train/CRISIS_00293
0 CRISIS/train/CRISIS_00298
0 CRISIS/train/CRISIS_00327
0 CRISIS/train/CRISIS_00356
0 CRISIS/train/CRISIS_00382
0 CRISIS/train/CRISIS_00391
0 CRISIS/train/CRISIS_00407
0 CRISIS/train/CRISIS_00415
0 CRISIS/train/CRISIS_00428
0 CRISIS/train/CRISIS_00430
0 CRISIS/train/CRISIS_00454
0 CRISIS/train/CRISIS_00456
0 CRISIS/train/CRISIS_00495
0 CRISIS/train/CRISIS_00526
0 CRISIS/train/CRISIS_00529
0 CRISIS/train/CRISIS_00642
0 CRISIS/train/CRISIS_00649
0 CRISIS/train/CRISIS_00660
0 CRISIS/train/CRISIS_00662
0 CRISIS/train/CRISIS_00669
0 CRISIS/train/CRISIS_00673
0 CRISIS/train/CRISIS_00707
0 CRISIS/train/CRISIS_00712
0 CRISIS/train/CRISIS_00721
0 CRISIS/train/CRISIS_00722
0 CRISIS/train/CRISIS_00738
0 CRISIS/train/CRISIS_00780
0 CRISIS/train/CRISIS_00825
0 CRISIS/train/CRISIS_00838
0 CRISIS/train/CRISIS_00855
0 CRISIS/train/CRISIS_00868
0 CRISIS/train/CRISIS_00877
0 CRISIS/train/CRISIS_00904
0 CRISIS/train/CRISIS_00948
0 CRISIS/train/CRISIS_00951
0 CRISIS/train/CRISIS_00964
0 CRISIS/val/CRISIS_00020
0 CRISIS/val/CRISIS_00032
0 CURRENT/test/CURRENT_00024
0 CURRENT/test/CURRENT_00041
0 CURRENT/train/CURRENT_00036
0 CURRENT/train/CURRENT_00041
0 CURRENT/train/CURRENT_00044
0 CURRENT/train/CURRENT_00046
0 CURRENT/train/CURRENT_00066
0 CURRENT/train/CURRENT_00094
0 CURRENT/train/CURRENT_00147
0 CURRENT/train/CURRENT_00152
0 CURRENT/train/CURRENT_00162
0 CURRENT/train/CURRENT_00266
0 CURRENT/train/CURRENT_00303
0 CURRENT/train/CURRENT_00309
0 CURRENT/train/CURRENT_00314
0 CURRENT/train/CURRENT_00349
0 CURRENT/train/CURRENT_00354
0 CURRENT/train/CURRENT_00364
0 CURRENT/train/CURRENT_00365
0 CURRENT/train/CURRENT_00388
0 CURRENT/train/CURRENT_00400
0 CURRENT/train/CURRENT_00422
0 CURRENT/train/CURRENT_00469
0 CURRENT/train/CURRENT_00490
0 CURRENT/train/CURRENT_00495
0 CURRENT/train/CURRENT_00515
0 CURRENT/train/CURRENT_00534
0 CURRENT/train/CURRENT_00549
0 CURRENT/train/CURRENT_00594
0 CURRENT/train/CURRENT_00646
0 CURRENT/train/CURRENT_00680
0 CURRENT/train/CURRENT_00682
0 CURRENT/train/CURRENT_00800
0 CURRENT/train/CURRENT_00811
0 CURRENT/train/CURRENT_00816
0 CURRENT/train/CURRENT_00824
0 CURRENT/train/CURRENT_00835
0 CURRENT/val/CURRENT_00015
0 CURRENT/val/CURRENT_00034
0 CURRENT/val/CURRENT_00035
0 CUSTOMERS/train/CUSTOMERS_00012
0 CUSTOMERS/train/CUSTOMERS_00015
0 CUSTOMERS/train/CUSTOMERS_00034
0 CUSTOMERS/train/CUSTOMERS_00039
0 CUSTOMERS/train/CUSTOMERS_00062
0 CUSTOMERS/train/CUSTOMERS_00124
0 CUSTOMERS/train/CUSTOMERS_00179
0 CUSTOMERS/train/CUSTOMERS_00266
0 CUSTOMERS/train/CUSTOMERS_00273
0 CUSTOMERS/train/CUSTOMERS_00309
0 CUSTOMERS/train/CUSTOMERS_00328
0 CUSTOMERS/train/CUSTOMERS_00346
0 CUSTOMERS/train/CUSTOMERS_00348
0 CUSTOMERS/train/CUSTOMERS_00384
0 CUSTOMERS/train/CUSTOMERS_00392
0 CUSTOMERS/train/CUSTOMERS_00413
0 CUSTOMERS/train/CUSTOMERS_00438
0 CUSTOMERS/train/CUSTOMERS_00502
0 CUSTOMERS/train/CUSTOMERS_00514
0 CUSTOMERS/train/CUSTOMERS_00611
0 CUSTOMERS/train/CUSTOMERS_00629
0 CUSTOMERS/train/CUSTOMERS_00646
0 CUSTOMERS/train/CUSTOMERS_00698
0 CUSTOMERS/train/CUSTOMERS_00745
0 CUSTOMERS/train/CUSTOMERS_00787
0 CUSTOMERS/train/CUSTOMERS_00833
0 CUSTOMERS/val/CUSTOMERS_00022
0 CUSTOMERS/val/CUSTOMERS_00050
0 DAVID/test/DAVID_00015
0 DAVID/test/DAVID_00034
0 DAVID/test/DAVID_00037
0 DAVID/train/DAVID_00007
0 DAVID/train/DAVID_00018
0 DAVID/train/DAVID_00021
0 DAVID/train/DAVID_00033
0 DAVID/train/DAVID_00035
0 DAVID/train/DAVID_00097
0 DAVID/train/DAVID_00121
0 DAVID/train/DAVID_00163
0 DAVID/train/DAVID_00178
0 DAVID/train/DAVID_00203
0 DAVID/train/DAVID_00206
0 DAVID/train/DAVID_00214
0 DAVID/train/DAVID_00230
0 DAVID/train/DAVID_00237
0 DAVID/train/DAVID_00241
0 DAVID/train/DAVID_00243
0 DAVID/train/DAVID_00254
0 DAVID/train/DAVID_00258
0 DAVID/train/DAVID_00301
0 DAVID/train/DAVID_00329
0 DAVID/train/DAVID_00330
0 DAVID/train/DAVID_00346
0 DAVID/train/DAVID_00359
0 DAVID/train/DAVID_00384
0 DAVID/train/DAVID_00413
0 DAVID/train/DAVID_00417
0 DAVID/train/DAVID_00436
0 DAVID/train/DAVID_00469
0 DAVID/train/DAVID_00487
0 DAVID/train/DAVID_00510
0 DAVID/train/DAVID_00513
0 DAVID/train/DAVID_00515
0 DAVID/train/DAVID_00520
0 DAVID/train/DAVID_00522
0 DAVID/train/DAVID_00568
0 DAVID/train/DAVID_00572
0 DAVID/train/DAVID_00591
0 DAVID/train/DAVID_00594
0 DAVID/train/DAVID_00609
0 DAVID/train/DAVID_00630
0 DAVID/train/DAVID_00633
0 DAVID/train/DAVID_00652
0 DAVID/train/DAVID_00665
0 DAVID/train/DAVID_00686
0 DAVID/train/DAVID_00687
0 DAVID/train/DAVID_00700
0 DAVID/train/DAVID_00714
0 DAVID/train/DAVID_00719
0 DAVID/train/DAVID_00722
0 DAVID/train/DAVID_00727
0 DAVID/train/DAVID_00737
0 DAVID/train/DAVID_00746
0 DAVID/train/DAVID_00781
0 DAVID/train/DAVID_00795
0 DAVID/train/DAVID_00796
0 DAVID/train/DAVID_00805
0 DAVID/train/DAVID_00825
0 DAVID/train/DAVID_00828
0 DAVID/train/DAVID_00833
0 DAVID/train/DAVID_00848
0 DAVID/train/DAVID_00857
0 DAVID/train/DAVID_00865
0 DAVID/train/DAVID_00874
0 DAVID/train/DAVID_00885
0 DAVID/train/DAVID_00899
0 DAVID/train/DAVID_00933
0 DAVID/train/DAVID_00935
0 DAVID/train/DAVID_00951
0 DAVID/train/DAVID_00979
0 DAVID/val/DAVID_00010
0 DAVID/val/DAVID_00022
0 DAVID/val/DAVID_00034
0 DAVID/val/DAVID_00038
0 DAVID/val/DAVID_00044
0 DAVID/val/DAVID_00045
0 DAVID/val/DAVID_00046
0 DEATH/test/DEATH_00017
0 DEATH/test/DEATH_00041
0 DEATH/test/DEATH_00050
0 DEATH/train/DEATH_00011
0 DEATH/train/DEATH_00020
0 DEATH/train/DEATH_00024
0 DEATH/train/DEATH_00063
0 DEATH/train/DEATH_00071
0 DEATH/train/DEATH_00080
0 DEATH/train/DEATH_00116
0 DEATH/train/DEATH_00150
0 DEATH/train/DEATH_00162
0 DEATH/train/DEATH_00172
0 DEATH/train/DEATH_00175
0 DEATH/train/DEATH_00190
0 DEATH/train/DEATH_00194
0 DEATH/train/DEATH_00200
0 DEATH/train/DEATH_00212
0 DEATH/train/DEATH_00238
0 DEATH/train/DEATH_00256
0 DEATH/train/DEATH_00290
0 DEATH/train/DEATH_00306
0 DEATH/train/DEATH_00318
0 DEATH/train/DEATH_00322
0 DEATH/train/DEATH_00345
0 DEATH/train/DEATH_00375
0 DEATH/train/DEATH_00416
0 DEATH/train/DEATH_00432
0 DEATH/train/DEATH_00442
0 DEATH/train/DEATH_00446
0 DEATH/train/DEATH_00454
0 DEATH/train/DEATH_00464
0 DEATH/train/DEATH_00483
0 DEATH/train/DEATH_00490
0 DEATH/train/DEATH_00496
0 DEATH/train/DEATH_00499
0 DEATH/train/DEATH_00504
0 DEATH/train/DEATH_00513
0 DEATH/train/DEATH_00530
0 DEATH/train/DEATH_00537
0 DEATH/train/DEATH_00545
0 DEATH/train/DEATH_00570
0 DEATH/train/DEATH_00585
0 DEATH/train/DEATH_00594
0 DEATH/train/DEATH_00606
0 DEATH/train/DEATH_00612
0 DEATH/train/DEATH_00623
0 DEATH/train/DEATH_00626
0 DEATH/train/DEATH_00637
0 DEATH/train/DEATH_00662
0 DEATH/train/DEATH_00706
0 DEATH/train/DEATH_00717
0 DEATH/train/DEATH_00718
0 DEATH/train/DEATH_00729
0 DEATH/train/DEATH_00754
0 DEATH/train/DEATH_00789
0 DEATH/train/DEATH_00824
0 DEATH/train/DEATH_00860
0 DEATH/train/DEATH_00876
0 DEATH/train/DEATH_00884
0 DEATH/train/DEATH_00894
0 DEATH/train/DEATH_00899
0 DEATH/train/DEATH_00911
0 DEATH/train/DEATH_00916
0 DEATH/train/DEATH_00936
0 DEATH/train/DEATH_00938
0 DEATH/train/DEATH_00939
0 DEATH/train/DEATH_00950
0 DEATH/train/DEATH_00951
0 DEATH/train/DEATH_00958
0 DEATH/train/DEATH_00993
0 DEATH/val/DEATH_00004
0 DEATH/val/DEATH_00011
0 DEATH/val/DEATH_00028
0 DEATH/val/DEATH_00041
0 DEBATE/train/DEBATE_00001
0 DEBATE/train/DEBATE_00005
0 DEBATE/train/DEBATE_00021
0 DEBATE/train/DEBATE_00033
0 DEBATE/train/DEBATE_00035
0 DEBATE/train/DEBATE_00088
0 DEBATE/train/DEBATE_00117
0 DEBATE/train/DEBATE_00120
0 DEBATE/train/DEBATE_00132
0 DEBATE/train/DEBATE_00150
0 DEBATE/train/DEBATE_00177
0 DEBATE/train/DEBATE_00227
0 DEBATE/train/DEBATE_00248
0 DEBATE/train/DEBATE_00282
0 DEBATE/train/DEBATE_00310
0 DEBATE/train/DEBATE_00363
0 DEBATE/train/DEBATE_00373
0 DEBATE/train/DEBATE_00377
0 DEBATE/train/DEBATE_00395
0 DEBATE/train/DEBATE_00407
0 DEBATE/train/DEBATE_00416
0 DEBATE/train/DEBATE_00428
0 DEBATE/train/DEBATE_00481
0 DEBATE/train/DEBATE_00483
0 DEBATE/train/DEBATE_00535
0 DEBATE/train/DEBATE_00588
0 DEBATE/train/DEBATE_00633
0 DEBATE/train/DEBATE_00662
0 DEBATE/train/DEBATE_00741
0 DEBATE/train/DEBATE_00773
0 DEBATE/train/DEBATE_00853
0 DEBATE/train/DEBATE_00894
0 DEBATE/train/DEBATE_00908
0 DEBATE/train/DEBATE_00913
0 DEBATE/train/DEBATE_00917
0 DEBATE/train/DEBATE_00942
0 DEBATE/train/DEBATE_00990
0 DEBATE/val/DEBATE_00011
0 DECIDED/test/DECIDED_00017
0 DECIDED/test/DECIDED_00028
0 DECIDED/test/DECIDED_00031
0 DECIDED/train/DECIDED_00029
0 DECIDED/train/DECIDED_00240
0 DECIDED/train/DECIDED_00247
0 DECIDED/train/DECIDED_00267
0 DECIDED/train/DECIDED_00279
0 DECIDED/train/DECIDED_00291
0 DECIDED/train/DECIDED_00293
0 DECIDED/train/DECIDED_00331
0 DECIDED/train/DECIDED_00364
0 DECIDED/train/DECIDED_00413
0 DECIDED/train/DECIDED_00472
0 DECIDED/train/DECIDED_00502
0 DECIDED/train/DECIDED_00507
0 DECIDED/train/DECIDED_00537
0 DECIDED/train/DECIDED_00576
0 DECIDED/train/DECIDED_00636
0 DECIDED/train/DECIDED_00653
0 DECIDED/train/DECIDED_00674
0 DECIDED/train/DECIDED_00680
0 DECIDED/train/DECIDED_00708
0 DECIDED/train/DECIDED_00713
0 DECIDED/train/DECIDED_00738
0 DECIDED/train/DECIDED_00748
0 DECIDED/train/DECIDED_00762
0 DECIDED/train/DECIDED_00787
0 DECIDED/train/DECIDED_00794
0 DECISION/test/DECISION_00006
0 DECISION/test/DECISION_00041
0 DECISION/train/DECISION_00004
0 DECISION/train/DECISION_00005
0 DECISION/train/DECISION_00008
0 DECISION/train/DECISION_00044
0 DECISION/train/DECISION_00052
0 DECISION/train/DECISION_00053
0 DECISION/train/DECISION_00054
0 DECISION/train/DECISION_00077
0 DECISION/train/DECISION_00079
0 DECISION/train/DECISION_00090
0 DECISION/train/DECISION_00101
0 DECISION/train/DECISION_00130
0 DECISION/train/DECISION_00134
0 DECISION/train/DECISION_00143
0 DECISION/train/DECISION_00146
0 DECISION/train/DECISION_00169
0 DECISION/train/DECISION_00179
0 DECISION/train/DECISION_00185
0 DECISION/train/DECISION_00221
0 DECISION/train/DECISION_00258
0 DECISION/train/DECISION_00276
0 DECISION/train/DECISION_00278
0 DECISION/train/DECISION_00287
0 DECISION/train/DECISION_00380
0 DECISION/train/DECISION_00382
0 DECISION/train/DECISION_00388
0 DECISION/train/DECISION_00407
0 DECISION/train/DECISION_00414
0 DECISION/train/DECISION_00429
0 DECISION/train/DECISION_00436
0 DECISION/train/DECISION_00442
0 DECISION/train/DECISION_00445
0 DECISION/train/DECISION_00450
0 DECISION/train/DECISION_00483
0 DECISION/train/DECISION_00487
0 DECISION/train/DECISION_00498
0 DECISION/train/DECISION_00515
0 DECISION/train/DECISION_00522
0 DECISION/train/DECISION_00569
0 DECISION/train/DECISION_00572
0 DECISION/train/DECISION_00596
0 DECISION/train/DECISION_00619
0 DECISION/train/DECISION_00624
0 DECISION/train/DECISION_00636
0 DECISION/train/DECISION_00645
0 DECISION/train/DECISION_00667
0 DECISION/train/DECISION_00679
0 DECISION/train/DECISION_00686
0 DECISION/train/DECISION_00694
0 DECISION/train/DECISION_00711
0 DECISION/train/DECISION_00718
0 DECISION/train/DECISION_00721
0 DECISION/train/DECISION_00735
0 DECISION/train/DECISION_00760
0 DECISION/train/DECISION_00774
0 DECISION/train/DECISION_00775
0 DECISION/train/DECISION_00785
0 DECISION/train/DECISION_00798
0 DECISION/train/DECISION_00832
0 DECISION/train/DECISION_00844
0 DECISION/train/DECISION_00849
0 DECISION/train/DECISION_00869
0 DECISION/train/DECISION_00885
0 DECISION/train/DECISION_00905
0 DECISION/train/DECISION_00908
0 DECISION/train/DECISION_00952
0 DECISION/train/DECISION_00996
0 DECISION/val/DECISION_00042
0 DECISION/val/DECISION_00049
0 DECISION/val/DECISION_00050
0 DEFICIT/test/DEFICIT_00001
0 DEFICIT/train/DEFICIT_00010
0 DEFICIT/train/DEFICIT_00050
0 DEFICIT/train/DEFICIT_00080
0 DEFICIT/train/DEFICIT_00092
0 DEFICIT/train/DEFICIT_00189
0 DEFICIT/train/DEFICIT_00244
0 DEFICIT/train/DEFICIT_00303
0 DEFICIT/train/DEFICIT_00321
0 DEFICIT/train/DEFICIT_00326
0 DEFICIT/train/DEFICIT_00418
0 DEFICIT/train/DEFICIT_00448
0 DEFICIT/train/DEFICIT_00464
0 DEFICIT/train/DEFICIT_00506
0 DEFICIT/train/DEFICIT_00546
0 DEFICIT/train/DEFICIT_00570
0 DEFICIT/train/DEFICIT_00595
0 DEFICIT/train/DEFICIT_00654
0 DEFICIT/train/DEFICIT_00662
0 DEFICIT/train/DEFICIT_00679
0 DEFICIT/train/DEFICIT_00706
0 DEFICIT/train/DEFICIT_00744
0 DEFICIT/train/DEFICIT_00827
0 DEFICIT/train/DEFICIT_00842
0 DEFICIT/train/DEFICIT_00860
0 DEFICIT/val/DEFICIT_00023
0 DEGREES/train/DEGREES_00623
0 DEGREES/train/DEGREES_00681
0 DEGREES/train/DEGREES_00809
0 DEGREES/train/DEGREES_00914
0 DESCRIBED/test/DESCRIBED_00032
0 DESCRIBED/train/DESCRIBED_00009
0 DESCRIBED/train/DESCRIBED_00011
0 DESCRIBED/train/DESCRIBED_00033
0 DESCRIBED/train/DESCRIBED_00069
0 DESCRIBED/train/DESCRIBED_00094
0 DESCRIBED/train/DESCRIBED_00145
0 DESCRIBED/train/DESCRIBED_00151
0 DESCRIBED/train/DESCRIBED_00181
0 DESCRIBED/train/DESCRIBED_00205
0 DESCRIBED/train/DESCRIBED_00239
0 DESCRIBED/train/DESCRIBED_00253
0 DESCRIBED/train/DESCRIBED_00309
0 DESCRIBED/train/DESCRIBED_00328
0 DESCRIBED/train/DESCRIBED_00366
0 DESCRIBED/train/DESCRIBED_00404
0 DESCRIBED/train/DESCRIBED_00409
0 DESCRIBED/train/DESCRIBED_00412
0 DESCRIBED/train/DESCRIBED_00413
0 DESCRIBED/train/DESCRIBED_00423
0 DESCRIBED/train/DESCRIBED_00432
0 DESCRIBED/train/DESCRIBED_00523
0 DESCRIBED/train/DESCRIBED_00527
0 DESCRIBED/train/DESCRIBED_00532
0 DESCRIBED/train/DESCRIBED_00565
0 DESCRIBED/train/DESCRIBED_00576
0 DESCRIBED/train/DESCRIBED_00610
0 DESCRIBED/train/DESCRIBED_00615
0 DESCRIBED/train/DESCRIBED_00655
0 DESCRIBED/train/DESCRIBED_00659
0 DESCRIBED/train/DESCRIBED_00695
0 DESCRIBED/train/DESCRIBED_00728
0 DESCRIBED/train/DESCRIBED_00747
0 DESCRIBED/train/DESCRIBED_00748
0 DESCRIBED/train/DESCRIBED_00751
0 DESCRIBED/train/DESCRIBED_00752
0 DESCRIBED/train/DESCRIBED_00782
0 DESCRIBED/train/DESCRIBED_00815
0 DESCRIBED/train/DESCRIBED_00856
0 DESCRIBED/train/DESCRIBED_00897
0 DESCRIBED/train/DESCRIBED_00924
0 DESCRIBED/train/DESCRIBED_00926
0 DESCRIBED/train/DESCRIBED_00947
0 DESCRIBED/val/DESCRIBED_00013
0 DESCRIBED/val/DESCRIBED_00021
0 DESCRIBED/val/DESCRIBED_00022
0 DESCRIBED/val/DESCRIBED_00049
0 DESPITE/test/DESPITE_00015
0 DESPITE/test/DESPITE_00026
0 DESPITE/test/DESPITE_00027
0 DESPITE/test/DESPITE_00033
0 DESPITE/train/DESPITE_00024
0 DESPITE/train/DESPITE_00065
0 DESPITE/train/DESPITE_00077
0 DESPITE/train/DESPITE_00085
0 DESPITE/train/DESPITE_00096
0 DESPITE/train/DESPITE_00097
0 DESPITE/train/DESPITE_00103
0 DESPITE/train/DESPITE_00117
0 DESPITE/train/DESPITE_00121
0 DESPITE/train/DESPITE_00130
0 DESPITE/train/DESPITE_00132
0 DESPITE/train/DESPITE_00143
0 DESPITE/train/DESPITE_00147
0 DESPITE/train/DESPITE_00150
0 DESPITE/train/DESPITE_00153
0 DESPITE/train/DESPITE_00173
0 DESPITE/train/DESPITE_00183
0 DESPITE/train/DESPITE_00187
0 DESPITE/train/DESPITE_00191
0 DESPITE/train/DESPITE_00195
0 DESPITE/train/DESPITE_00208
0 DESPITE/train/DESPITE_00209
0 DESPITE/train/DESPITE_00214
0 DESPITE/train/DESPITE_00217
0 DESPITE/train/DESPITE_00220
0 DESPITE/train/DESPITE_00237
0 DESPITE/train/DESPITE_00238
0 DESPITE/train/DESPITE_00263
0 DESPITE/train/DESPITE_00296
0 DESPITE/train/DESPITE_00307
0 DESPITE/train/DESPITE_00314
0 DESPITE/train/DESPITE_00334
0 DESPITE/train/DESPITE_00336
0 DESPITE/train/DESPITE_00340
0 DESPITE/train/DESPITE_00341
0 DESPITE/train/DESPITE_00368
0 DESPITE/train/DESPITE_00399
0 DESPITE/train/DESPITE_00414
0 DESPITE/train/DESPITE_00419
0 DESPITE/train/DESPITE_00422
0 DESPITE/train/DESPITE_00469
0 DESPITE/train/DESPITE_00486
0 DESPITE/train/DESPITE_00490
0 DESPITE/train/DESPITE_00520
0 DESPITE/train/DESPITE_00531
0 DESPITE/train/DESPITE_00535
0 DESPITE/train/DESPITE_00538
0 DESPITE/train/DESPITE_00567
0 DESPITE/train/DESPITE_00606
0 DESPITE/train/DESPITE_00625
0 DESPITE/train/DESPITE_00640
0 DESPITE/train/DESPITE_00643
0 DESPITE/train/DESPITE_00660
0 DESPITE/train/DESPITE_00662
0 DESPITE/train/DESPITE_00667
0 DESPITE/train/DESPITE_00672
0 DESPITE/train/DESPITE_00718
0 DESPITE/train/DESPITE_00728
0 DESPITE/train/DESPITE_00734
0 DESPITE/train/DESPITE_00737
0 DESPITE/train/DESPITE_00739
0 DESPITE/train/DESPITE_00764
0 DESPITE/train/DESPITE_00787
0 DESPITE/train/DESPITE_00788
0 DESPITE/train/DESPITE_00798
0 DESPITE/train/DESPITE_00810
0 DESPITE/train/DESPITE_00832
0 DESPITE/train/DESPITE_00836
0 DESPITE/train/DESPITE_00842
0 DESPITE/train/DESPITE_00844
0 DESPITE/train/DESPITE_00874
0 DESPITE/train/DESPITE_00879
0 DESPITE/train/DESPITE_00902
0 DESPITE/train/DESPITE_00908
0 DESPITE/train/DESPITE_00912
0 DESPITE/train/DESPITE_00927
0 DESPITE/train/DESPITE_00931
0 DESPITE/train/DESPITE_00939
0 DESPITE/train/DESPITE_00949
0 DESPITE/train/DESPITE_00950
0 DESPITE/train/DESPITE_00960
0 DESPITE/train/DESPITE_00967
0 DESPITE/train/DESPITE_00978
0 DESPITE/train/DESPITE_00980
0 DESPITE/train/DESPITE_00985
0 DESPITE/val/DESPITE_00021
0 DESPITE/val/DESPITE_00022
0 DESPITE/val/DESPITE_00025
0 DESPITE/val/DESPITE_00050
0 DETAILS/test/DETAILS_00024
0 DETAILS/train/DETAILS_00014
0 DETAILS/train/DETAILS_00049
0 DETAILS/train/DETAILS_00057
0 DETAILS/train/DETAILS_00061
0 DETAILS/train/DETAILS_00064
0 DETAILS/train/DETAILS_00090
0 DETAILS/train/DETAILS_00096
0 DETAILS/train/DETAILS_00101
0 DETAILS/train/DETAILS_00106
0 DETAILS/train/DETAILS_00120
0 DETAILS/train/DETAILS_00124
0 DETAILS/train/DETAILS_00133
0 DETAILS/train/DETAILS_00134
0 DETAILS/train/DETAILS_00138
0 DETAILS/train/DETAILS_00146
0 DETAILS/train/DETAILS_00155
0 DETAILS/train/DETAILS_00163
0 DETAILS/train/DETAILS_00179
0 DETAILS/train/DETAILS_00183
0 DETAILS/train/DETAILS_00189
0 DETAILS/train/DETAILS_00194
0 DETAILS/train/DETAILS_00195
0 DETAILS/train/DETAILS_00205
0 DETAILS/train/DETAILS_00207
0 DETAILS/train/DETAILS_00216
0 DETAILS/train/DETAILS_00223
0 DETAILS/train/DETAILS_00229
0 DETAILS/train/DETAILS_00234
0 DETAILS/train/DETAILS_00252
0 DETAILS/train/DETAILS_00259
0 DETAILS/train/DETAILS_00264
0 DETAILS/train/DETAILS_00330
0 DETAILS/train/DETAILS_00339
0 DETAILS/train/DETAILS_00358
0 DETAILS/train/DETAILS_00360
0 DETAILS/train/DETAILS_00366
0 DETAILS/train/DETAILS_00368
0 DETAILS/train/DETAILS_00416
0 DETAILS/train/DETAILS_00417
0 DETAILS/train/DETAILS_00429
0 DETAILS/train/DETAILS_00432
0 DETAILS/train/DETAILS_00442
0 DETAILS/train/DETAILS_00444
0 DETAILS/train/DETAILS_00455
0 DETAILS/train/DETAILS_00461
0 DETAILS/train/DETAILS_00483
0 DETAILS/train/DETAILS_00507
0 DETAILS/train/DETAILS_00518
0 DETAILS/train/DETAILS_00521
0 DETAILS/train/DETAILS_00522
0 DETAILS/train/DETAILS_00539
0 DETAILS/train/DETAILS_00565
0 DETAILS/train/DETAILS_00580
0 DETAILS/train/DETAILS_00585
0 DETAILS/train/DETAILS_00588
0 DETAILS/train/DETAILS_00603
0 DETAILS/train/DETAILS_00604
0 DETAILS/train/DETAILS_00605
0 DETAILS/train/DETAILS_00608
0 DETAILS/train/DETAILS_00623
0 DETAILS/train/DETAILS_00632
0 DETAILS/train/DETAILS_00657
0 DETAILS/train/DETAILS_00667
0 DETAILS/train/DETAILS_00670
0 DETAILS/train/DETAILS_00674
0 DETAILS/train/DETAILS_00675
0 DETAILS/train/DETAILS_00679
0 DETAILS/train/DETAILS_00707
0 DETAILS/train/DETAILS_00710
0 DETAILS/train/DETAILS_00755
0 DETAILS/train/DETAILS_00756
0 DETAILS/train/DETAILS_00762
0 DETAILS/train/DETAILS_00777
0 DETAILS/train/DETAILS_00784
0 DETAILS/train/DETAILS_00786
0 DETAILS/train/DETAILS_00790
0 DETAILS/train/DETAILS_00809
0 DETAILS/train/DETAILS_00810
0 DETAILS/train/DETAILS_00819
0 DETAILS/train/DETAILS_00823
0 DETAILS/train/DETAILS_00830
0 DETAILS/train/DETAILS_00841
0 DETAILS/train/DETAILS_00843
0 DETAILS/train/DETAILS_00855
0 DETAILS/train/DETAILS_00885
0 DETAILS/train/DETAILS_00913
0 DETAILS/train/DETAILS_00915
0 DETAILS/train/DETAILS_00922
0 DETAILS/train/DETAILS_00925
0 DETAILS/train/DETAILS_00941
0 DETAILS/train/DETAILS_00943
0 DETAILS/train/DETAILS_00952
0 DETAILS/train/DETAILS_00964
0 DETAILS/train/DETAILS_00967
0 DETAILS/train/DETAILS_00983
0 DETAILS/train/DETAILS_00990
0 DETAILS/train/DETAILS_00994
0 DETAILS/val/DETAILS_00001
0 DETAILS/val/DETAILS_00004
0 DETAILS/val/DETAILS_00012
0 DETAILS/val/DETAILS_00013
0 DETAILS/val/DETAILS_00014
0 DIFFERENCE/train/DIFFERENCE_00125
0 DIFFERENCE/train/DIFFERENCE_00178
0 DIFFERENCE/train/DIFFERENCE_00289
0 DIFFERENCE/train/DIFFERENCE_00328
0 DIFFERENCE/train/DIFFERENCE_00329
0 DIFFERENCE/train/DIFFERENCE_00406
0 DIFFERENCE/train/DIFFERENCE_00431
0 DIFFERENCE/train/DIFFERENCE_00475
0 DIFFERENCE/train/DIFFERENCE_00488
0 DIFFERENCE/train/DIFFERENCE_00704
0 DIFFERENCE/train/DIFFERENCE_00720
0 DIFFERENT/train/DIFFERENT_00231
0 DIFFERENT/train/DIFFERENT_00378
0 DIFFERENT/train/DIFFERENT_00397
0 DIFFERENT/train/DIFFERENT_00537
0 DIFFERENT/train/DIFFERENT_00633
0 DIFFERENT/train/DIFFERENT_00657
0 DIFFERENT/train/DIFFERENT_00710
0 DIFFERENT/train/DIFFERENT_00900
0 DIFFERENT/train/DIFFERENT_00981
0 DIFFICULT/train/DIFFICULT_00017
0 DIFFICULT/train/DIFFICULT_00090
0 DIFFICULT/train/DIFFICULT_00295
0 DIFFICULT/train/DIFFICULT_00627
0 DIFFICULT/train/DIFFICULT_00762
0 DIFFICULT/train/DIFFICULT_00798
0 DIFFICULT/train/DIFFICULT_00903
0 DIFFICULT/train/DIFFICULT_00944
0 DIFFICULT/train/DIFFICULT_00945
0 DOING/train/DOING_00197
0 DOING/train/DOING_00560
0 DOING/train/DOING_00589
0 DOING/train/DOING_00811
0 DOING/train/DOING_00958
0 DURING/test/DURING_00007
0 DURING/test/DURING_00026
0 DURING/train/DURING_00023
0 DURING/train/DURING_00050
0 DURING/train/DURING_00069
0 DURING/train/DURING_00076
0 DURING/train/DURING_00095
0 DURING/train/DURING_00150
0 DURING/train/DURING_00161
0 DURING/train/DURING_00179
0 DURING/train/DURING_00182
0 DURING/train/DURING_00189
0 DURING/train/DURING_00207
0 DURING/train/DURING_00228
0 DURING/train/DURING_00234
0 DURING/train/DURING_00246
0 DURING/train/DURING_00250
0 DURING/train/DURING_00258
0 DURING/train/DURING_00283
0 DURING/train/DURING_00318
0 DURING/train/DURING_00340
0 DURING/train/DURING_00349
0 DURING/train/DURING_00362
0 DURING/train/DURING_00368
0 DURING/train/DURING_00390
0 DURING/train/DURING_00391
0 DURING/train/DURING_00392
0 DURING/train/DURING_00397
0 DURING/train/DURING_00414
0 DURING/train/DURING_00416
0 DURING/train/DURING_00444
0 DURING/train/DURING_00450
0 DURING/train/DURING_00504
0 DURING/train/DURING_00510
0 DURING/train/DURING_00518
0 DURING/train/DURING_00549
0 DURING/train/DURING_00560
0 DURING/train/DURING_00603
0 DURING/train/DURING_00628
0 DURING/train/DURING_00631
0 DURING/train/DURING_00633
0 DURING/train/DURING_00649
0 DURING/train/DURING_00675
0 DURING/train/DURING_00687
0 DURING/train/DURING_00699
0 DURING/train/DURING_00723
0 DURING/train/DURING_00735
0 DURING/train/DURING_00737
0 DURING/train/DURING_00765
0 DURING/train/DURING_00771
0 DURING/train/DURING_00806
0 DURING/train/DURING_00810
0 DURING/train/DURING_00818
0 DURING/train/DURING_00826
0 DURING/train/DURING_00831
0 DURING/train/DURING_00832
0 DURING/train/DURING_00904
0 DURING/train/DURING_00910
0 DURING/train/DURING_00938
0 DURING/train/DURING_00951
0 DURING/train/DURING_00991
0 DURING/train/DURING_00996
0 DURING/val/DURING_00006
0 DURING/val/DURING_00037
0 EARLY/test/EARLY_00019
0 EARLY/test/EARLY_00031
0 EARLY/train/EARLY_00010
0 EARLY/train/EARLY_00024
0 EARLY/train/EARLY_00084
0 EARLY/train/EARLY_00085
0 EARLY/train/EARLY_00091
0 EARLY/train/EARLY_00092
0 EARLY/train/EARLY_00103
0 EARLY/train/EARLY_00142
0 EARLY/train/EARLY_00144
0 EARLY/train/EARLY_00166
0 EARLY/train/EARLY_00174
0 EARLY/train/EARLY_00231
0 EARLY/train/EARLY_00236
0 EARLY/train/EARLY_00282
0 EARLY/train/EARLY_00283
0 EARLY/train/EARLY_00384
0 EARLY/train/EARLY_00402
0 EARLY/train/EARLY_00416
0 EARLY/train/EARLY_00458
0 EARLY/train/EARLY_00499
0 EARLY/train/EARLY_00574
0 EARLY/train/EARLY_00646
0 EARLY/train/EARLY_00683
0 EARLY/train/EARLY_00726
0 EARLY/train/EARLY_00744
0 EARLY/train/EARLY_00754
0 EARLY/train/EARLY_00769
0 EARLY/train/EARLY_00774
0 EARLY/train/EARLY_00794
0 EARLY/train/EARLY_00806
0 EARLY/train/EARLY_00819
0 EARLY/train/EARLY_00822
0 EARLY/train/EARLY_00827
0 EARLY/train/EARLY_00851
0 EARLY/train/EARLY_00898
0 EARLY/train/EARLY_00949
0 EARLY/train/EARLY_00973
0 EARLY/train/EARLY_00998
0 EARLY/val/EARLY_00032
0 EASTERN/test/EASTERN_00008
0 EASTERN/train/EASTERN_00033
0 EASTERN/train/EASTERN_00039
0 EASTERN/train/EASTERN_00106
0 EASTERN/train/EASTERN_00121
0 EASTERN/train/EASTERN_00122
0 EASTERN/train/EASTERN_00165
0 EASTERN/train/EASTERN_00200
0 EASTERN/train/EASTERN_00205
0 EASTERN/train/EASTERN_00210
0 EASTERN/train/EASTERN_00218
0 EASTERN/train/EASTERN_00287
0 EASTERN/train/EASTERN_00288
0 EASTERN/train/EASTERN_00329
0 EASTERN/train/EASTERN_00363
0 EASTERN/train/EASTERN_00391
0 EASTERN/train/EASTERN_00404
0 EASTERN/train/EASTERN_00405
0 EASTERN/train/EASTERN_00446
0 EASTERN/train/EASTERN_00458
0 EASTERN/train/EASTERN_00474
0 EASTERN/train/EASTERN_00514
0 EASTERN/train/EASTERN_00526
0 EASTERN/train/EASTERN_00546
0 EASTERN/train/EASTERN_00640
0 EASTERN/train/EASTERN_00658
0 EASTERN/train/EASTERN_00684
0 EASTERN/train/EASTERN_00718
0 EASTERN/train/EASTERN_00732
0 EASTERN/train/EASTERN_00764
0 EASTERN/train/EASTERN_00771
0 EASTERN/train/EASTERN_00872
0 EASTERN/train/EASTERN_00882
0 EASTERN/train/EASTERN_00913
0 EASTERN/train/EASTERN_00996
0 ECONOMIC/test/ECONOMIC_00025
0 ECONOMIC/test/ECONOMIC_00030
0 ECONOMIC/train/ECONOMIC_00001
0 ECONOMIC/train/ECONOMIC_00016
0 ECONOMIC/train/ECONOMIC_00099
0 ECONOMIC/train/ECONOMIC_00109
0 ECONOMIC/train/ECONOMIC_00114
0 ECONOMIC/train/ECONOMIC_00126
0 ECONOMIC/train/ECONOMIC_00127
0 ECONOMIC/train/ECONOMIC_00129
0 ECONOMIC/train/ECONOMIC_00138
0 ECONOMIC/train/ECONOMIC_00158
0 ECONOMIC/train/ECONOMIC_00172
0 ECONOMIC/train/ECONOMIC_00191
0 ECONOMIC/train/ECONOMIC_00205
0 ECONOMIC/train/ECONOMIC_00224
0 ECONOMIC/train/ECONOMIC_00228
0 ECONOMIC/train/ECONOMIC_00236
0 ECONOMIC/train/ECONOMIC_00242
0 ECONOMIC/train/ECONOMIC_00243
0 ECONOMIC/train/ECONOMIC_00248
0 ECONOMIC/train/ECONOMIC_00252
0 ECONOMIC/train/ECONOMIC_00311
0 ECONOMIC/train/ECONOMIC_00331
0 ECONOMIC/train/ECONOMIC_00334
0 ECONOMIC/train/ECONOMIC_00336
0 ECONOMIC/train/ECONOMIC_00341
0 ECONOMIC/train/ECONOMIC_00365
0 ECONOMIC/train/ECONOMIC_00372
0 ECONOMIC/train/ECONOMIC_00387
0 ECONOMIC/train/ECONOMIC_00388
0 ECONOMIC/train/ECONOMIC_00413
0 ECONOMIC/train/ECONOMIC_00419
0 ECONOMIC/train/ECONOMIC_00489
0 ECONOMIC/train/ECONOMIC_00490
0 ECONOMIC/train/ECONOMIC_00522
0 ECONOMIC/train/ECONOMIC_00532
0 ECONOMIC/train/ECONOMIC_00541
0 ECONOMIC/train/ECONOMIC_00546
0 ECONOMIC/train/ECONOMIC_00615
0 ECONOMIC/train/ECONOMIC_00642
0 ECONOMIC/train/ECONOMIC_00648
0 ECONOMIC/train/ECONOMIC_00685
0 ECONOMIC/train/ECONOMIC_00686
0 ECONOMIC/train/ECONOMIC_00714
0 ECONOMIC/train/ECONOMIC_00727
0 ECONOMIC/train/ECONOMIC_00734
0 ECONOMIC/train/ECONOMIC_00759
0 ECONOMIC/train/ECONOMIC_00787
0 ECONOMIC/train/ECONOMIC_00822
0 ECONOMIC/train/ECONOMIC_00825
0 ECONOMIC/train/ECONOMIC_00906
0 ECONOMIC/train/ECONOMIC_00919
0 ECONOMIC/train/ECONOMIC_00950
0 ECONOMIC/train/ECONOMIC_00959
0 ECONOMIC/val/ECONOMIC_00004
0 ECONOMIC/val/ECONOMIC_00035
0 ECONOMIC/val/ECONOMIC_00049
0 ECONOMIC/val/ECONOMIC_00050
0 ECONOMY/train/ECONOMY_00008
0 ECONOMY/train/ECONOMY_00059
0 ECONOMY/train/ECONOMY_00101
0 ECONOMY/train/ECONOMY_00114
0 ECONOMY/train/ECONOMY_00124
0 ECONOMY/train/ECONOMY_00129
0 ECONOMY/train/ECONOMY_00154
0 ECONOMY/train/ECONOMY_00161
0 ECONOMY/train/ECONOMY_00207
0 ECONOMY/train/ECONOMY_00224
0 ECONOMY/train/ECONOMY_00236
0 ECONOMY/train/ECONOMY_00243
0 ECONOMY/train/ECONOMY_00249
0 ECONOMY/train/ECONOMY_00293
0 ECONOMY/train/ECONOMY_00296
0 ECONOMY/train/ECONOMY_00297
0 ECONOMY/train/ECONOMY_00311
0 ECONOMY/train/ECONOMY_00321
0 ECONOMY/train/ECONOMY_00348
0 ECONOMY/train/ECONOMY_00363
0 ECONOMY/train/ECONOMY_00365
0 ECONOMY/train/ECONOMY_00384
0 ECONOMY/train/ECONOMY_00396
0 ECONOMY/train/ECONOMY_00407
0 ECONOMY/train/ECONOMY_00414
0 ECONOMY/train/ECONOMY_00417
0 ECONOMY/train/ECONOMY_00441
0 ECONOMY/train/ECONOMY_00442
0 ECONOMY/train/ECONOMY_00466
0 ECONOMY/train/ECONOMY_00482
0 ECONOMY/train/ECONOMY_00491
0 ECONOMY/train/ECONOMY_00495
0 ECONOMY/train/ECONOMY_00509
0 ECONOMY/train/ECONOMY_00510
0 ECONOMY/train/ECONOMY_00715
0 ECONOMY/train/ECONOMY_00725
0 ECONOMY/train/ECONOMY_00764
0 ECONOMY/train/ECONOMY_00765
0 ECONOMY/train/ECONOMY_00790
0 ECONOMY/train/ECONOMY_00832
0 ECONOMY/train/ECONOMY_00881
0 ECONOMY/train/ECONOMY_00912
0 ECONOMY/train/ECONOMY_00928
0 ECONOMY/train/ECONOMY_00937
0 ECONOMY/train/ECONOMY_00957
0 ECONOMY/train/ECONOMY_00968
0 ECONOMY/train/ECONOMY_00970
0 ECONOMY/train/ECONOMY_00994
0 ECONOMY/val/ECONOMY_00010
0 ECONOMY/val/ECONOMY_00016
0 ECONOMY/val/ECONOMY_00019
0 EDITOR/test/EDITOR_00003
0 EDITOR/test/EDITOR_00004
0 EDITOR/test/EDITOR_00010
0 EDITOR/test/EDITOR_00012
0 EDITOR/test/EDITOR_00013
0 EDITOR/test/EDITOR_00019
0 EDITOR/test/EDITOR_00020
0 EDITOR/test/EDITOR_00022
0 EDITOR/test/EDITOR_00025
0 EDITOR/test/EDITOR_00027
0 EDITOR/test/EDITOR_00029
0 EDITOR/test/EDITOR_00031
0 EDITOR/test/EDITOR_00038
0 EDITOR/test/EDITOR_00040
0 EDITOR/test/EDITOR_00048
0 EDITOR/test/EDITOR_00050
0 EDITOR/train/EDITOR_00003
0 EDITOR/train/EDITOR_00005
0 EDITOR/train/EDITOR_00015
0 EDITOR/train/EDITOR_00017
0 EDITOR/train/EDITOR_00020
0 EDITOR/train/EDITOR_00021
0 EDITOR/train/EDITOR_00025
0 EDITOR/train/EDITOR_00032
0 EDITOR/train/EDITOR_00034
0 EDITOR/train/EDITOR_00038
0 EDITOR/train/EDITOR_00043
0 EDITOR/train/EDITOR_00044
0 EDITOR/train/EDITOR_00047
0 EDITOR/train/EDITOR_00049
0 EDITOR/train/EDITOR_00051
0 EDITOR/train/EDITOR_00053
0 EDITOR/train/EDITOR_00054
0 EDITOR/train/EDITOR_00055
0 EDITOR/train/EDITOR_00059
0 EDITOR/train/EDITOR_00064
0 EDITOR/train/EDITOR_00069
0 EDITOR/train/EDITOR_00070
0 EDITOR/train/EDITOR_00072
0 EDITOR/train/EDITOR_00084
0 EDITOR/train/EDITOR_00085
0 EDITOR/train/EDITOR_00088
0 EDITOR/train/EDITOR_00096
0 EDITOR/train/EDITOR_00099
0 EDITOR/train/EDITOR_00100
0 EDITOR/train/EDITOR_00101
0 EDITOR/train/EDITOR_00102
0 EDITOR/train/EDITOR_00103
0 EDITOR/train/EDITOR_00104
0 EDITOR/train/EDITOR_00122
0 EDITOR/train/EDITOR_00126
0 EDITOR/train/EDITOR_00129
0 EDITOR/train/EDITOR_00136
0 EDITOR/train/EDITOR_00143
0 EDITOR/train/EDITOR_00144
0 EDITOR/train/EDITOR_00147
0 EDITOR/train/EDITOR_00156
0 EDITOR/train/EDITOR_00157
0 EDITOR/train/EDITOR_00160
0 EDITOR/train/EDITOR_00169
0 EDITOR/train/EDITOR_00172
0 EDITOR/train/EDITOR_00175
0 EDITOR/train/EDITOR_00177
0 EDITOR/train/EDITOR_00178
0 EDITOR/train/EDITOR_00179
0 EDITOR/train/EDITOR_00181
0 EDITOR/train/EDITOR_00183
0 EDITOR/train/EDITOR_00187
0 EDITOR/train/EDITOR_00188
0 EDITOR/train/EDITOR_00189
0 EDITOR/train/EDITOR_00192
0 EDITOR/train/EDITOR_00196
0 EDITOR/train/EDITOR_00199
0 EDITOR/train/EDITOR_00201
0 EDITOR/train/EDITOR_00202
0 EDITOR/train/EDITOR_00204
0 EDITOR/train/EDITOR_00206
0 EDITOR/train/EDITOR_00211
0 EDITOR/train/EDITOR_00213
0 EDITOR/train/EDITOR_00226
0 EDITOR/train/EDITOR_00229
0 EDITOR/train/EDITOR_00231
0 EDITOR/train/EDITOR_00236
0 EDITOR/train/EDITOR_00240
0 EDITOR/train/EDITOR_00243
0 EDITOR/train/EDITOR_00252
0 EDITOR/train/EDITOR_00253
0 EDITOR/train/EDITOR_00255
0 EDITOR/train/EDITOR_00262
0 EDITOR/train/EDITOR_00264
0 EDITOR/train/EDITOR_00269
0 EDITOR/train/EDITOR_00270
0 EDITOR/train/EDITOR_00275
0 EDITOR/train/EDITOR_00277
0 EDITOR/train/EDITOR_00279
0 EDITOR/train/EDITOR_00280
0 EDITOR/train/EDITOR_00284
0 EDITOR/train/EDITOR_00285
0 EDITOR/train/EDITOR_00286
0 EDITOR/train/EDITOR_00289
0 EDITOR/train/EDITOR_00291
0 EDITOR/train/EDITOR_00298
0 EDITOR/train/EDITOR_00299
0 EDITOR/train/EDITOR_00302
0 EDITOR/train/EDITOR_00306
0 EDITOR/train/EDITOR_00308
0 EDITOR/train/EDITOR_00323
0 EDITOR/train/EDITOR_00327
0 EDITOR/train/EDITOR_00328
0 EDITOR/train/EDITOR_00329
0 EDITOR/train/EDITOR_00335
0 EDITOR/train/EDITOR_00343
0 EDITOR/train/EDITOR_00345
0 EDITOR/train/EDITOR_00349
0 EDITOR/train/EDITOR_00350
0 EDITOR/train/EDITOR_00351
0 EDITOR/train/EDITOR_00375
0 EDITOR/train/EDITOR_00378
0 EDITOR/train/EDITOR_00386
0 EDITOR/train/EDITOR_00387
0 EDITOR/train/EDITOR_00390
0 EDITOR/train/EDITOR_00392
0 EDITOR/train/EDITOR_00395
0 EDITOR/train/EDITOR_00396
0 EDITOR/train/EDITOR_00399
0 EDITOR/train/EDITOR_00402
0 EDITOR/train/EDITOR_00409
0 EDITOR/train/EDITOR_00417
0 EDITOR/train/EDITOR_00418
0 EDITOR/train/EDITOR_00419
0 EDITOR/train/EDITOR_00420
0 EDITOR/train/EDITOR_00423
0 EDITOR/train/EDITOR_00424
0 EDITOR/train/EDITOR_00425
0 EDITOR/train/EDITOR_00430
0 EDITOR/train/EDITOR_00432
0 EDITOR/train/EDITOR_00433
0 EDITOR/train/EDITOR_00440
0 EDITOR/train/EDITOR_00443
0 EDITOR/train/EDITOR_00451
0 EDITOR/train/EDITOR_00455
0 EDITOR/train/EDITOR_00457
0 EDITOR/train/EDITOR_00459
0 EDITOR/train/EDITOR_00461
0 EDITOR/train/EDITOR_00464
0 EDITOR/train/EDITOR_00468
0 EDITOR/train/EDITOR_00472
0 EDITOR/train/EDITOR_00473
0 EDITOR/train/EDITOR_00480
0 EDITOR/train/EDITOR_00485
0 EDITOR/train/EDITOR_00490
0 EDITOR/train/EDITOR_00491
0 EDITOR/train/EDITOR_00493
0 EDITOR/train/EDITOR_00495
0 EDITOR/train/EDITOR_00499
0 EDITOR/train/EDITOR_00502
0 EDITOR/train/EDITOR_00504
0 EDITOR/train/EDITOR_00505
0 EDITOR/train/EDITOR_00510
0 EDITOR/train/EDITOR_00518
0 EDITOR/train/EDITOR_00520
0 EDITOR/train/EDITOR_00522
0 EDITOR/train/EDITOR_00524
0 EDITOR/train/EDITOR_00526
0 EDITOR/train/EDITOR_00528
0 EDITOR/train/EDITOR_00530
0 EDITOR/train/EDITOR_00532
0 EDITOR/train/EDITOR_00534
0 EDITOR/train/EDITOR_00535
0 EDITOR/train/EDITOR_00538
0 EDITOR/train/EDITOR_00542
0 EDITOR/train/EDITOR_00548
0 EDITOR/train/EDITOR_00552
0 EDITOR/train/EDITOR_00560
0 EDITOR/train/EDITOR_00569
0 EDITOR/train/EDITOR_00571
0 EDITOR/train/EDITOR_00573
0 EDITOR/train/EDITOR_00576
0 EDITOR/train/EDITOR_00578
0 EDITOR/train/EDITOR_00583
0 EDITOR/train/EDITOR_00590
0 EDITOR/train/EDITOR_00594
0 EDITOR/train/EDITOR_00599
0 EDITOR/train/EDITOR_00604
0 EDITOR/train/EDITOR_00606
0 EDITOR/train/EDITOR_00609
0 EDITOR/train/EDITOR_00611
0 EDITOR/train/EDITOR_00622
0 EDITOR/train/EDITOR_00625
0 EDITOR/train/EDITOR_00629
0 EDITOR/train/EDITOR_00637
0 EDITOR/train/EDITOR_00639
0 EDITOR/train/EDITOR_00641
0 EDITOR/train/EDITOR_00644
0 EDITOR/train/EDITOR_00646
0 EDITOR/train/EDITOR_00647
0 EDITOR/train/EDITOR_00649
0 EDITOR/train/EDITOR_00650
0 EDITOR/train/EDITOR_00651
0 EDITOR/train/EDITOR_00653
0 EDITOR/train/EDITOR_00657
0 EDITOR/train/EDITOR_00660
0 EDITOR/train/EDITOR_00661
0 EDITOR/train/EDITOR_00668
0 EDITOR/train/EDITOR_00670
0 EDITOR/train/EDITOR_00673
0 EDITOR/train/EDITOR_00675
0 EDITOR/train/EDITOR_00678
0 EDITOR/train/EDITOR_00683
0 EDITOR/train/EDITOR_00693
0 EDITOR/train/EDITOR_00700
0 EDITOR/train/EDITOR_00709
0 EDITOR/train/EDITOR_00710
0 EDITOR/train/EDITOR_00711
0 EDITOR/train/EDITOR_00712
0 EDITOR/train/EDITOR_00716
0 EDITOR/train/EDITOR_00717
0 EDITOR/train/EDITOR_00723
0 EDITOR/train/EDITOR_00724
0 EDITOR/train/EDITOR_00725
0 EDITOR/train/EDITOR_00728
0 EDITOR/train/EDITOR_00729
0 EDITOR/train/EDITOR_00730
0 EDITOR/train/EDITOR_00734
0 EDITOR/train/EDITOR_00735
0 EDITOR/train/EDITOR_00737
0 EDITOR/train/EDITOR_00741
0 EDITOR/train/EDITOR_00747
0 EDITOR/train/EDITOR_00751
0 EDITOR/train/EDITOR_00756
0 EDITOR/train/EDITOR_00760
0 EDITOR/train/EDITOR_00764
0 EDITOR/train/EDITOR_00767
0 EDITOR/train/EDITOR_00770
0 EDITOR/train/EDITOR_00774
0 EDITOR/train/EDITOR_00776
0 EDITOR/train/EDITOR_00779
0 EDITOR/train/EDITOR_00785
0 EDITOR/train/EDITOR_00786
0 EDITOR/train/EDITOR_00789
0 EDITOR/train/EDITOR_00792
0 EDITOR/train/EDITOR_00796
0 EDITOR/train/EDITOR_00799
0 EDITOR/train/EDITOR_00808
0 EDITOR/train/EDITOR_00809
0 EDITOR/train/EDITOR_00814
0 EDITOR/train/EDITOR_00817
0 EDITOR/train/EDITOR_00818
0 EDITOR/train/EDITOR_00820
0 EDITOR/train/EDITOR_00821
0 EDITOR/train/EDITOR_00822
0 EDITOR/train/EDITOR_00823
0 EDITOR/train/EDITOR_00826
0 EDITOR/train/EDITOR_00833
0 EDITOR/train/EDITOR_00836
0 EDITOR/train/EDITOR_00837
0 EDITOR/train/EDITOR_00842
0 EDITOR/train/EDITOR_00845
0 EDITOR/train/EDITOR_00847
0 EDITOR/train/EDITOR_00850
0 EDITOR/train/EDITOR_00864
0 EDITOR/train/EDITOR_00867
0 EDITOR/train/EDITOR_00868
0 EDITOR/train/EDITOR_00869
0 EDITOR/train/EDITOR_00870
0 EDITOR/train/EDITOR_00872
0 EDITOR/train/EDITOR_00877
0 EDITOR/train/EDITOR_00882
0 EDITOR/train/EDITOR_00884
0 EDITOR/train/EDITOR_00886
0 EDITOR/train/EDITOR_00887
0 EDITOR/train/EDITOR_00889
0 EDITOR/train/EDITOR_00894
0 EDITOR/train/EDITOR_00901
0 EDITOR/train/EDITOR_00902
0 EDITOR/train/EDITOR_00906
0 EDITOR/train/EDITOR_00911
0 EDITOR/train/EDITOR_00919
0 EDITOR/train/EDITOR_00920
0 EDITOR/train/EDITOR_00921
0 EDITOR/train/EDITOR_00927
0 EDITOR/train/EDITOR_00930
0 EDITOR/train/EDITOR_00932
0 EDITOR/train/EDITOR_00938
0 EDITOR/train/EDITOR_00941
0 EDITOR/train/EDITOR_00944
0 EDITOR/train/EDITOR_00948
0 EDITOR/train/EDITOR_00951
0 EDITOR/train/EDITOR_00952
0 EDITOR/train/EDITOR_00953
0 EDITOR/train/EDITOR_00956
0 EDITOR/train/EDITOR_00957
0 EDITOR/train/EDITOR_00958
0 EDITOR/train/EDITOR_00961
0 EDITOR/train/EDITOR_00963
0 EDITOR/train/EDITOR_00969
0 EDITOR/train/EDITOR_00971
0 EDITOR/train/EDITOR_00972
0 EDITOR/train/EDITOR_00977
0 EDITOR/train/EDITOR_00978
0 EDITOR/train/EDITOR_00987
0 EDITOR/train/EDITOR_00989
0 EDITOR/train/EDITOR_00991
0 EDITOR/train/EDITOR_00993
0 EDITOR/train/EDITOR_00994
0 EDITOR/train/EDITOR_00997
0 EDITOR/val/EDITOR_00005
0 EDITOR/val/EDITOR_00007
0 EDITOR/val/EDITOR_00008
0 EDITOR/val/EDITOR_00009
0 EDITOR/val/EDITOR_00012
0 EDITOR/val/EDITOR_00014
0 EDITOR/val/EDITOR_00018
0 EDITOR/val/EDITOR_00019
0 EDITOR/val/EDITOR_00020
0 EDITOR/val/EDITOR_00030
0 EDITOR/val/EDITOR_00032
0 EDITOR/val/EDITOR_00039
0 EDITOR/val/EDITOR_00040
0 EDITOR/val/EDITOR_00041
0 EDITOR/val/EDITOR_00043
0 EDITOR/val/EDITOR_00046
0 EDITOR/val/EDITOR_00048
0 EDUCATION/test/EDUCATION_00009
0 EDUCATION/test/EDUCATION_00036
0 EDUCATION/train/EDUCATION_00087
0 EDUCATION/train/EDUCATION_00157
0 EDUCATION/train/EDUCATION_00166
0 EDUCATION/train/EDUCATION_00186
0 EDUCATION/train/EDUCATION_00209
0 EDUCATION/train/EDUCATION_00250
0 EDUCATION/train/EDUCATION_00261
0 EDUCATION/train/EDUCATION_00264
0 EDUCATION/train/EDUCATION_00291
0 EDUCATION/train/EDUCATION_00305
0 EDUCATION/train/EDUCATION_00308
0 EDUCATION/train/EDUCATION_00372
0 EDUCATION/train/EDUCATION_00380
0 EDUCATION/train/EDUCATION_00405
0 EDUCATION/train/EDUCATION_00410
0 EDUCATION/train/EDUCATION_00432
0 EDUCATION/train/EDUCATION_00458
0 EDUCATION/train/EDUCATION_00464
0 EDUCATION/train/EDUCATION_00489
0 EDUCATION/train/EDUCATION_00554
0 EDUCATION/train/EDUCATION_00603
0 EDUCATION/train/EDUCATION_00641
0 EDUCATION/train/EDUCATION_00652
0 EDUCATION/train/EDUCATION_00654
0 EDUCATION/train/EDUCATION_00672
0 EDUCATION/train/EDUCATION_00683
0 EDUCATION/train/EDUCATION_00720
0 EDUCATION/train/EDUCATION_00721
0 EDUCATION/train/EDUCATION_00772
0 EDUCATION/train/EDUCATION_00792
0 EDUCATION/train/EDUCATION_00882
0 EDUCATION/train/EDUCATION_00885
0 EDUCATION/train/EDUCATION_00893
0 EDUCATION/train/EDUCATION_00994
0 EDUCATION/val/EDUCATION_00007
0 ELECTION/test/ELECTION_00013
0 ELECTION/test/ELECTION_00028
0 ELECTION/test/ELECTION_00031
0 ELECTION/train/ELECTION_00024
0 ELECTION/train/ELECTION_00056
0 ELECTION/train/ELECTION_00067
0 ELECTION/train/ELECTION_00071
0 ELECTION/train/ELECTION_00077
0 ELECTION/train/ELECTION_00079
0 ELECTION/train/ELECTION_00116
0 ELECTION/train/ELECTION_00135
0 ELECTION/train/ELECTION_00149
0 ELECTION/train/ELECTION_00153
0 ELECTION/train/ELECTION_00182
0 ELECTION/train/ELECTION_00205
0 ELECTION/train/ELECTION_00290
0 ELECTION/train/ELECTION_00312
0 ELECTION/train/ELECTION_00319
0 ELECTION/train/ELECTION_00321
0 ELECTION/train/ELECTION_00330
0 ELECTION/train/ELECTION_00332
0 ELECTION/train/ELECTION_00346
0 ELECTION/train/ELECTION_00347
0 ELECTION/train/ELECTION_00366
0 ELECTION/train/ELECTION_00400
0 ELECTION/train/ELECTION_00406
0 ELECTION/train/ELECTION_00408
0 ELECTION/train/ELECTION_00422
0 ELECTION/train/ELECTION_00426
0 ELECTION/train/ELECTION_00434
0 ELECTION/train/ELECTION_00459
0 ELECTION/train/ELECTION_00483
0 ELECTION/train/ELECTION_00490
0 ELECTION/train/ELECTION_00493
0 ELECTION/train/ELECTION_00523
0 ELECTION/train/ELECTION_00538
0 ELECTION/train/ELECTION_00553
0 ELECTION/train/ELECTION_00598
0 ELECTION/train/ELECTION_00599
0 ELECTION/train/ELECTION_00611
0 ELECTION/train/ELECTION_00650
0 ELECTION/train/ELECTION_00659
0 ELECTION/train/ELECTION_00676
0 ELECTION/train/ELECTION_00679
0 ELECTION/train/ELECTION_00704
0 ELECTION/train/ELECTION_00724
0 ELECTION/train/ELECTION_00751
0 ELECTION/train/ELECTION_00756
0 ELECTION/train/ELECTION_00833
0 ELECTION/train/ELECTION_00846
0 ELECTION/train/ELECTION_00875
0 ELECTION/train/ELECTION_00918
0 ELECTION/train/ELECTION_00953
0 ELECTION/train/ELECTION_00962
0 ELECTION/train/ELECTION_00983
0 ELECTION/train/ELECTION_00996
0 ELECTION/val/ELECTION_00014
0 ELECTION/val/ELECTION_00036
0 ELECTION/val/ELECTION_00037
0 ELECTION/val/ELECTION_00042
0 EMERGENCY/test/EMERGENCY_00007
0 EMERGENCY/test/EMERGENCY_00037
0 EMERGENCY/test/EMERGENCY_00040
0 EMERGENCY/train/EMERGENCY_00019
0 EMERGENCY/train/EMERGENCY_00032
0 EMERGENCY/train/EMERGENCY_00059
0 EMERGENCY/train/EMERGENCY_00076
0 EMERGENCY/train/EMERGENCY_00077
0 EMERGENCY/train/EMERGENCY_00093
0 EMERGENCY/train/EMERGENCY_00098
0 EMERGENCY/train/EMERGENCY_00136
0 EMERGENCY/train/EMERGENCY_00221
0 EMERGENCY/train/EMERGENCY_00239
0 EMERGENCY/train/EMERGENCY_00266
0 EMERGENCY/train/EMERGENCY_00285
0 EMERGENCY/train/EMERGENCY_00311
0 EMERGENCY/train/EMERGENCY_00359
0 EMERGENCY/train/EMERGENCY_00362
0 EMERGENCY/train/EMERGENCY_00376
0 EMERGENCY/train/EMERGENCY_00401
0 EMERGENCY/train/EMERGENCY_00440
0 EMERGENCY/train/EMERGENCY_00446
0 EMERGENCY/train/EMERGENCY_00448
0 EMERGENCY/train/EMERGENCY_00460
0 EMERGENCY/train/EMERGENCY_00500
0 EMERGENCY/train/EMERGENCY_00502
0 EMERGENCY/train/EMERGENCY_00510
0 EMERGENCY/train/EMERGENCY_00517
0 EMERGENCY/train/EMERGENCY_00528
0 EMERGENCY/train/EMERGENCY_00529
0 EMERGENCY/train/EMERGENCY_00575
0 EMERGENCY/train/EMERGENCY_00616
0 EMERGENCY/train/EMERGENCY_00636
0 EMERGENCY/train/EMERGENCY_00645
0 EMERGENCY/train/EMERGENCY_00646
0 EMERGENCY/train/EMERGENCY_00656
0 EMERGENCY/train/EMERGENCY_00677
0 EMERGENCY/train/EMERGENCY_00694
0 EMERGENCY/train/EMERGENCY_00702
0 EMERGENCY/train/EMERGENCY_00703
0 EMERGENCY/train/EMERGENCY_00714
0 EMERGENCY/train/EMERGENCY_00723
0 EMERGENCY/train/EMERGENCY_00740
0 EMERGENCY/train/EMERGENCY_00746
0 EMERGENCY/train/EMERGENCY_00768
0 EMERGENCY/train/EMERGENCY_00778
0 EMERGENCY/train/EMERGENCY_00788
0 EMERGENCY/val/EMERGENCY_00037
0 ENERGY/train/ENERGY_00001
0 ENERGY/train/ENERGY_00018
0 ENERGY/train/ENERGY_00031
0 ENERGY/train/ENERGY_00062
0 ENERGY/train/ENERGY_00118
0 ENERGY/train/ENERGY_00146
0 ENERGY/train/ENERGY_00153
0 ENERGY/train/ENERGY_00271
0 ENERGY/train/ENERGY_00390
0 ENERGY/train/ENERGY_00396
0 ENERGY/train/ENERGY_00401
0 ENERGY/train/ENERGY_00409
0 ENERGY/train/ENERGY_00415
0 ENERGY/train/ENERGY_00470
0 ENERGY/train/ENERGY_00479
0 ENERGY/train/ENERGY_00532
0 ENERGY/train/ENERGY_00566
0 ENERGY/train/ENERGY_00621
0 ENERGY/train/ENERGY_00630
0 ENERGY/train/ENERGY_00639
0 ENERGY/train/ENERGY_00678
0 ENERGY/train/ENERGY_00705
0 ENERGY/train/ENERGY_00744
0 ENERGY/train/ENERGY_00747
0 ENERGY/train/ENERGY_00792
0 ENERGY/train/ENERGY_00819
0 ENERGY/train/ENERGY_00835
0 ENERGY/train/ENERGY_00850
0 ENERGY/train/ENERGY_00911
0 ENERGY/train/ENERGY_00960
0 ENERGY/train/ENERGY_00990
0 ENGLAND/test/ENGLAND_00048
0 ENGLAND/train/ENGLAND_00072
0 ENGLAND/train/ENGLAND_00083
0 ENGLAND/train/ENGLAND_00129
0 ENGLAND/train/ENGLAND_00204
0 ENGLAND/train/ENGLAND_00211
0 ENGLAND/train/ENGLAND_00213
0 ENGLAND/train/ENGLAND_00243
0 ENGLAND/train/ENGLAND_00255
0 ENGLAND/train/ENGLAND_00274
0 ENGLAND/train/ENGLAND_00285
0 ENGLAND/train/ENGLAND_00297
0 ENGLAND/train/ENGLAND_00319
0 ENGLAND/train/ENGLAND_00399
0 ENGLAND/train/ENGLAND_00409
0 ENGLAND/train/ENGLAND_00440
0 ENGLAND/train/ENGLAND_00460
0 ENGLAND/train/ENGLAND_00462
0 ENGLAND/train/ENGLAND_00490
0 ENGLAND/train/ENGLAND_00491
0 ENGLAND/train/ENGLAND_00503
0 ENGLAND/train/ENGLAND_00517
0 ENGLAND/train/ENGLAND_00538
0 ENGLAND/train/ENGLAND_00600
0 ENGLAND/train/ENGLAND_00606
0 ENGLAND/train/ENGLAND_00627
0 ENGLAND/train/ENGLAND_00641
0 ENGLAND/train/ENGLAND_00664
0 ENGLAND/train/ENGLAND_00740
0 ENGLAND/train/ENGLAND_00741
0 ENGLAND/train/ENGLAND_00749
0 ENGLAND/train/ENGLAND_00755
0 ENGLAND/train/ENGLAND_00763
0 ENGLAND/train/ENGLAND_00770
0 ENGLAND/train/ENGLAND_00789
0 ENGLAND/train/ENGLAND_00806
0 ENGLAND/train/ENGLAND_00886
0 ENGLAND/train/ENGLAND_00930
0 ENGLAND/train/ENGLAND_00945
0 ENGLAND/train/ENGLAND_00956
0 ENGLAND/train/ENGLAND_00981
0 ENGLAND/val/ENGLAND_00008
0 ENGLAND/val/ENGLAND_00028
0 ENOUGH/train/ENOUGH_00024
0 ENOUGH/train/ENOUGH_00209
0 ENOUGH/train/ENOUGH_00251
0 ENOUGH/train/ENOUGH_00253
0 ENOUGH/train/ENOUGH_00313
0 ENOUGH/train/ENOUGH_00457
0 ENOUGH/train/ENOUGH_00499
0 ENOUGH/train/ENOUGH_00641
0 ENOUGH/train/ENOUGH_00695
0 ENOUGH/train/ENOUGH_00779
0 ENOUGH/train/ENOUGH_00796
0 ENOUGH/train/ENOUGH_00822
0 ENOUGH/train/ENOUGH_00851
0 ENOUGH/train/ENOUGH_00948
0 EUROPEAN/train/EUROPEAN_00009
0 EUROPEAN/train/EUROPEAN_00016
0 EUROPEAN/train/EUROPEAN_00026
0 EUROPEAN/train/EUROPEAN_00040
0 EUROPEAN/train/EUROPEAN_00052
0 EUROPEAN/train/EUROPEAN_00056
0 EUROPEAN/train/EUROPEAN_00066
0 EUROPEAN/train/EUROPEAN_00074
0 EUROPEAN/train/EUROPEAN_00083
0 EUROPEAN/train/EUROPEAN_00103
0 EUROPEAN/train/EUROPEAN_00109
0 EUROPEAN/train/EUROPEAN_00159
0 EUROPEAN/train/EUROPEAN_00191
0 EUROPEAN/train/EUROPEAN_00227
0 EUROPEAN/train/EUROPEAN_00236
0 EUROPEAN/train/EUROPEAN_00314
0 EUROPEAN/train/EUROPEAN_00343
0 EUROPEAN/train/EUROPEAN_00357
0 EUROPEAN/train/EUROPEAN_00444
0 EUROPEAN/train/EUROPEAN_00457
0 EUROPEAN/train/EUROPEAN_00477
0 EUROPEAN/train/EUROPEAN_00501
0 EUROPEAN/train/EUROPEAN_00506
0 EUROPEAN/train/EUROPEAN_00549
0 EUROPEAN/train/EUROPEAN_00559
0 EUROPEAN/train/EUROPEAN_00568
0 EUROPEAN/train/EUROPEAN_00570
0 EUROPEAN/train/EUROPEAN_00585
0 EUROPEAN/train/EUROPEAN_00627
0 EUROPEAN/train/EUROPEAN_00709
0 EUROPEAN/train/EUROPEAN_00722
0 EUROPEAN/train/EUROPEAN_00729
0 EUROPEAN/train/EUROPEAN_00753
0 EUROPEAN/train/EUROPEAN_00762
0 EUROPEAN/train/EUROPEAN_00771
0 EUROPEAN/train/EUROPEAN_00830
0 EUROPEAN/train/EUROPEAN_00853
0 EUROPEAN/train/EUROPEAN_00855
0 EUROPEAN/train/EUROPEAN_00856
0 EUROPEAN/train/EUROPEAN_00885
0 EUROPEAN/train/EUROPEAN_00893
0 EUROPEAN/train/EUROPEAN_00914
0 EUROPEAN/train/EUROPEAN_00927
0 EUROPEAN/train/EUROPEAN_00935
0 EUROPEAN/train/EUROPEAN_00967
0 EUROPEAN/train/EUROPEAN_00980
0 EUROPEAN/train/EUROPEAN_00987
0 EUROPEAN/val/EUROPEAN_00031
0 EUROPEAN/val/EUROPEAN_00033
0 EUROPEAN/val/EUROPEAN_00038
0 EUROPE/test/EUROPE_00036
0 EUROPE/test/EUROPE_00050
0 EUROPE/train/EUROPE_00002
0 EUROPE/train/EUROPE_00019
0 EUROPE/train/EUROPE_00021
0 EUROPE/train/EUROPE_00031
0 EUROPE/train/EUROPE_00046
0 EUROPE/train/EUROPE_00049
0 EUROPE/train/EUROPE_00056
0 EUROPE/train/EUROPE_00160
0 EUROPE/train/EUROPE_00191
0 EUROPE/train/EUROPE_00198
0 EUROPE/train/EUROPE_00210
0 EUROPE/train/EUROPE_00218
0 EUROPE/train/EUROPE_00223
0 EUROPE/train/EUROPE_00245
0 EUROPE/train/EUROPE_00353
0 EUROPE/train/EUROPE_00355
0 EUROPE/train/EUROPE_00362
0 EUROPE/train/EUROPE_00429
0 EUROPE/train/EUROPE_00456
0 EUROPE/train/EUROPE_00514
0 EUROPE/train/EUROPE_00539
0 EUROPE/train/EUROPE_00564
0 EUROPE/train/EUROPE_00579
0 EUROPE/train/EUROPE_00592
0 EUROPE/train/EUROPE_00608
0 EUROPE/train/EUROPE_00653
0 EUROPE/train/EUROPE_00680
0 EUROPE/train/EUROPE_00814
0 EUROPE/train/EUROPE_00842
0 EUROPE/train/EUROPE_00861
0 EUROPE/train/EUROPE_00905
0 EUROPE/train/EUROPE_00947
0 EUROPE/train/EUROPE_00981
0 EUROPE/val/EUROPE_00049
0 EVENING/test/EVENING_00029
0 EVENING/test/EVENING_00033
0 EVENING/test/EVENING_00039
0 EVENING/train/EVENING_00021
0 EVENING/train/EVENING_00031
0 EVENING/train/EVENING_00037
0 EVENING/train/EVENING_00039
0 EVENING/train/EVENING_00043
0 EVENING/train/EVENING_00052
0 EVENING/train/EVENING_00059
0 EVENING/train/EVENING_00069
0 EVENING/train/EVENING_00074
0 EVENING/train/EVENING_00122
0 EVENING/train/EVENING_00142
0 EVENING/train/EVENING_00146
0 EVENING/train/EVENING_00161
0 EVENING/train/EVENING_00169
0 EVENING/train/EVENING_00171
0 EVENING/train/EVENING_00177
0 EVENING/train/EVENING_00194
0 EVENING/train/EVENING_00205
0 EVENING/train/EVENING_00209
0 EVENING/train/EVENING_00218
0 EVENING/train/EVENING_00226
0 EVENING/train/EVENING_00240
0 EVENING/train/EVENING_00243
0 EVENING/train/EVENING_00244
0 EVENING/train/EVENING_00267
0 EVENING/train/EVENING_00275
0 EVENING/train/EVENING_00290
0 EVENING/train/EVENING_00295
0 EVENING/train/EVENING_00330
0 EVENING/train/EVENING_00350
0 EVENING/train/EVENING_00351
0 EVENING/train/EVENING_00359
0 EVENING/train/EVENING_00360
0 EVENING/train/EVENING_00368
0 EVENING/train/EVENING_00377
0 EVENING/train/EVENING_00394
0 EVENING/train/EVENING_00399
0 EVENING/train/EVENING_00429
0 EVENING/train/EVENING_00449
0 EVENING/train/EVENING_00452
0 EVENING/train/EVENING_00467
0 EVENING/train/EVENING_00492
0 EVENING/train/EVENING_00495
0 EVENING/train/EVENING_00508
0 EVENING/train/EVENING_00511
0 EVENING/train/EVENING_00514
0 EVENING/train/EVENING_00543
0 EVENING/train/EVENING_00554
0 EVENING/train/EVENING_00575
0 EVENING/train/EVENING_00582
0 EVENING/train/EVENING_00587
0 EVENING/train/EVENING_00590
0 EVENING/train/EVENING_00615
0 EVENING/train/EVENING_00629
0 EVENING/train/EVENING_00649
0 EVENING/train/EVENING_00655
0 EVENING/train/EVENING_00661
0 EVENING/train/EVENING_00667
0 EVENING/train/EVENING_00700
0 EVENING/train/EVENING_00719
0 EVENING/train/EVENING_00761
0 EVENING/train/EVENING_00792
0 EVENING/train/EVENING_00801
0 EVENING/train/EVENING_00828
0 EVENING/train/EVENING_00837
0 EVENING/train/EVENING_00840
0 EVENING/train/EVENING_00847
0 EVENING/train/EVENING_00862
0 EVENING/train/EVENING_00866
0 EVENING/train/EVENING_00873
0 EVENING/train/EVENING_00883
0 EVENING/train/EVENING_00898
0 EVENING/train/EVENING_00908
0 EVENING/train/EVENING_00920
0 EVENING/train/EVENING_00973
0 EVENING/train/EVENING_00975
0 EVENING/train/EVENING_00991
0 EVENING/train/EVENING_00996
0 EVENING/val/EVENING_00003
0 EVENING/val/EVENING_00013
0 EVENING/val/EVENING_00015
0 EVENING/val/EVENING_00040
0 EVENTS/test/EVENTS_00049
0 EVENTS/train/EVENTS_00017
0 EVENTS/train/EVENTS_00101
0 EVENTS/train/EVENTS_00128
0 EVENTS/train/EVENTS_00142
0 EVENTS/train/EVENTS_00143
0 EVENTS/train/EVENTS_00212
0 EVENTS/train/EVENTS_00230
0 EVENTS/train/EVENTS_00242
0 EVENTS/train/EVENTS_00282
0 EVENTS/train/EVENTS_00283
0 EVENTS/train/EVENTS_00285
0 EVENTS/train/EVENTS_00286
0 EVENTS/train/EVENTS_00299
0 EVENTS/train/EVENTS_00313
0 EVENTS/train/EVENTS_00318
0 EVENTS/train/EVENTS_00350
0 EVENTS/train/EVENTS_00362
0 EVENTS/train/EVENTS_00407
0 EVENTS/train/EVENTS_00453
0 EVENTS/train/EVENTS_00518
0 EVENTS/train/EVENTS_00567
0 EVENTS/train/EVENTS_00578
0 EVENTS/train/EVENTS_00594
0 EVENTS/train/EVENTS_00622
0 EVENTS/train/EVENTS_00631
0 EVENTS/train/EVENTS_00639
0 EVENTS/train/EVENTS_00640
0 EVENTS/train/EVENTS_00656
0 EVENTS/train/EVENTS_00662
0 EVENTS/train/EVENTS_00676
0 EVENTS/train/EVENTS_00680
0 EVENTS/train/EVENTS_00701
0 EVENTS/train/EVENTS_00712
0 EVENTS/train/EVENTS_00775
0 EVENTS/train/EVENTS_00800
0 EVENTS/train/EVENTS_00801
0 EVENTS/train/EVENTS_00819
0 EVENTS/train/EVENTS_00826
0 EVENTS/train/EVENTS_00840
0 EVENTS/train/EVENTS_00844
0 EVENTS/val/EVENTS_00021
0 EVENTS/val/EVENTS_00038
0 EVERYONE/train/EVERYONE_00033
0 EVERYONE/train/EVERYONE_00144
0 EVERYONE/train/EVERYONE_00204
0 EVERYONE/train/EVERYONE_00542
0 EVERYONE/train/EVERYONE_00562
0 EVERYONE/train/EVERYONE_00627
0 EVERYONE/train/EVERYONE_00657
0 EVERYONE/train/EVERYONE_00876
0 EVERYONE/val/EVERYONE_00032
0 EVERYTHING/train/EVERYTHING_00220
0 EVERYTHING/train/EVERYTHING_00248
0 EVERYTHING/train/EVERYTHING_00284
0 EVERYTHING/train/EVERYTHING_00838
0 EVERYTHING/train/EVERYTHING_00953
0 EVERY/train/EVERY_00022
0 EVERY/train/EVERY_00026
0 EVERY/train/EVERY_00070
0 EVERY/train/EVERY_00193
0 EVERY/train/EVERY_00202
0 EVERY/train/EVERY_00229
0 EVERY/train/EVERY_00379
0 EVERY/train/EVERY_00394
0 EVERY/train/EVERY_00398
0 EVERY/train/EVERY_00422
0 EVERY/train/EVERY_00455
0 EVERY/train/EVERY_00523
0 EVERY/train/EVERY_00563
0 EVERY/train/EVERY_00592
0 EVERY/train/EVERY_00689
0 EVERY/train/EVERY_00783
0 EVERY/train/EVERY_00795
0 EVERY/train/EVERY_00817
0 EVERY/train/EVERY_00844
0 EVERY/train/EVERY_00885
0 EVIDENCE/test/EVIDENCE_00032
0 EVIDENCE/test/EVIDENCE_00040
0 EVIDENCE/train/EVIDENCE_00018
0 EVIDENCE/train/EVIDENCE_00024
0 EVIDENCE/train/EVIDENCE_00074
0 EVIDENCE/train/EVIDENCE_00081
0 EVIDENCE/train/EVIDENCE_00083
0 EVIDENCE/train/EVIDENCE_00100
0 EVIDENCE/train/EVIDENCE_00121
0 EVIDENCE/train/EVIDENCE_00122
0 EVIDENCE/train/EVIDENCE_00136
0 EVIDENCE/train/EVIDENCE_00165
0 EVIDENCE/train/EVIDENCE_00191
0 EVIDENCE/train/EVIDENCE_00197
0 EVIDENCE/train/EVIDENCE_00202
0 EVIDENCE/train/EVIDENCE_00212
0 EVIDENCE/train/EVIDENCE_00262
0 EVIDENCE/train/EVIDENCE_00264
0 EVIDENCE/train/EVIDENCE_00290
0 EVIDENCE/train/EVIDENCE_00312
0 EVIDENCE/train/EVIDENCE_00333
0 EVIDENCE/train/EVIDENCE_00336
0 EVIDENCE/train/EVIDENCE_00338
0 EVIDENCE/train/EVIDENCE_00395
0 EVIDENCE/train/EVIDENCE_00464
0 EVIDENCE/train/EVIDENCE_00474
0 EVIDENCE/train/EVIDENCE_00528
0 EVIDENCE/train/EVIDENCE_00543
0 EVIDENCE/train/EVIDENCE_00584
0 EVIDENCE/train/EVIDENCE_00595
0 EVIDENCE/train/EVIDENCE_00602
0 EVIDENCE/train/EVIDENCE_00637
0 EVIDENCE/train/EVIDENCE_00646
0 EVIDENCE/train/EVIDENCE_00651
0 EVIDENCE/train/EVIDENCE_00734
0 EVIDENCE/train/EVIDENCE_00736
0 EVIDENCE/train/EVIDENCE_00768
0 EVIDENCE/train/EVIDENCE_00842
0 EVIDENCE/train/EVIDENCE_00880
0 EVIDENCE/train/EVIDENCE_00894
0 EVIDENCE/train/EVIDENCE_00910
0 EVIDENCE/train/EVIDENCE_00913
0 EVIDENCE/train/EVIDENCE_00935
0 EVIDENCE/train/EVIDENCE_00939
0 EVIDENCE/train/EVIDENCE_00991
0 EVIDENCE/train/EVIDENCE_00999
0 EVIDENCE/val/EVIDENCE_00040
0 EVIDENCE/val/EVIDENCE_00048
0 EXACTLY/train/EXACTLY_00126
0 EXACTLY/train/EXACTLY_00513
0 EXACTLY/train/EXACTLY_00749
0 EXACTLY/train/EXACTLY_00894
0 EXAMPLE/test/EXAMPLE_00047
0 EXAMPLE/train/EXAMPLE_00035
0 EXAMPLE/train/EXAMPLE_00260
0 EXAMPLE/train/EXAMPLE_00261
0 EXAMPLE/train/EXAMPLE_00320
0 EXAMPLE/train/EXAMPLE_00480
0 EXAMPLE/train/EXAMPLE_00837
0 EXAMPLE/val/EXAMPLE_00037
0 EXPECTED/test/EXPECTED_00003
0 EXPECTED/test/EXPECTED_00022
0 EXPECTED/train/EXPECTED_00008
0 EXPECTED/train/EXPECTED_00012
0 EXPECTED/train/EXPECTED_00022
0 EXPECTED/train/EXPECTED_00024
0 EXPECTED/train/EXPECTED_00036
0 EXPECTED/train/EXPECTED_00079
0 EXPECTED/train/EXPECTED_00103
0 EXPECTED/train/EXPECTED_00104
0 EXPECTED/train/EXPECTED_00136
0 EXPECTED/train/EXPECTED_00171
0 EXPECTED/train/EXPECTED_00195
0 EXPECTED/train/EXPECTED_00270
0 EXPECTED/train/EXPECTED_00284
0 EXPECTED/train/EXPECTED_00305
0 EXPECTED/train/EXPECTED_00308
0 EXPECTED/train/EXPECTED_00317
0 EXPECTED/train/EXPECTED_00343
0 EXPECTED/train/EXPECTED_00349
0 EXPECTED/train/EXPECTED_00384
0 EXPECTED/train/EXPECTED_00453
0 EXPECTED/train/EXPECTED_00465
0 EXPECTED/train/EXPECTED_00467
0 EXPECTED/train/EXPECTED_00471
0 EXPECTED/train/EXPECTED_00539
0 EXPECTED/train/EXPECTED_00558
0 EXPECTED/train/EXPECTED_00565
0 EXPECTED/train/EXPECTED_00571
0 EXPECTED/train/EXPECTED_00616
0 EXPECTED/train/EXPECTED_00652
0 EXPECTED/train/EXPECTED_00655
0 EXPECTED/train/EXPECTED_00667
0 EXPECTED/train/EXPECTED_00699
0 EXPECTED/train/EXPECTED_00724
0 EXPECTED/train/EXPECTED_00740
0 EXPECTED/train/EXPECTED_00772
0 EXPECTED/train/EXPECTED_00801
0 EXPECTED/train/EXPECTED_00848
0 EXPECTED/train/EXPECTED_00895
0 EXPECTED/train/EXPECTED_00899
0 EXPECTED/train/EXPECTED_00914
0 EXPECTED/train/EXPECTED_00921
0 EXPECTED/train/EXPECTED_00938
0 EXPECTED/train/EXPECTED_00955
0 EXPECTED/train/EXPECTED_00959
0 EXPECTED/train/EXPECTED_00978
0 EXPECTED/train/EXPECTED_00992
0 EXPECTED/train/EXPECTED_00994
0 EXPECT/train/EXPECT_00047
0 EXPECT/train/EXPECT_00135
0 EXPECT/train/EXPECT_00229
0 EXPECT/train/EXPECT_00231
0 EXPECT/train/EXPECT_00461
0 EXPECT/train/EXPECT_00468
0 EXPECT/train/EXPECT_00656
0 EXPECT/train/EXPECT_00657
0 EXPECT/train/EXPECT_00729
0 EXPECT/train/EXPECT_00831
0 EXPECT/train/EXPECT_00896
0 EXPECT/val/EXPECT_00012
0 EXTRA/test/EXTRA_00025
0 EXTRA/test/EXTRA_00026
0 EXTRA/test/EXTRA_00039
0 EXTRA/train/EXTRA_00059
0 EXTRA/train/EXTRA_00079
0 EXTRA/train/EXTRA_00104
0 EXTRA/train/EXTRA_00152
0 EXTRA/train/EXTRA_00198
0 EXTRA/train/EXTRA_00265
0 EXTRA/train/EXTRA_00315
0 EXTRA/train/EXTRA_00352
0 EXTRA/train/EXTRA_00474
0 EXTRA/train/EXTRA_00476
0 EXTRA/train/EXTRA_00493
0 EXTRA/train/EXTRA_00516
0 EXTRA/train/EXTRA_00593
0 EXTRA/train/EXTRA_00595
0 EXTRA/train/EXTRA_00626
0 EXTRA/train/EXTRA_00655
0 EXTRA/train/EXTRA_00681
0 EXTRA/train/EXTRA_00707
0 EXTRA/train/EXTRA_00724
0 EXTRA/train/EXTRA_00746
0 EXTRA/train/EXTRA_00749
0 EXTRA/train/EXTRA_00750
0 EXTRA/train/EXTRA_00772
0 EXTRA/train/EXTRA_00786
0 EXTRA/train/EXTRA_00853
0 EXTRA/val/EXTRA_00002
0 FACING/test/FACING_00020
0 FACING/test/FACING_00028
0 FACING/train/FACING_00006
0 FACING/train/FACING_00014
0 FACING/train/FACING_00072
0 FACING/train/FACING_00091
0 FACING/train/FACING_00104
0 FACING/train/FACING_00134
0 FACING/train/FACING_00204
0 FACING/train/FACING_00215
0 FACING/train/FACING_00238
0 FACING/train/FACING_00246
0 FACING/train/FACING_00248
0 FACING/train/FACING_00252
0 FACING/train/FACING_00303
0 FACING/train/FACING_00341
0 FACING/train/FACING_00353
0 FACING/train/FACING_00361
0 FACING/train/FACING_00465
0 FACING/train/FACING_00482
0 FACING/train/FACING_00488
0 FACING/train/FACING_00489
0 FACING/train/FACING_00501
0 FACING/train/FACING_00507
0 FACING/train/FACING_00524
0 FACING/train/FACING_00528
0 FACING/train/FACING_00536
0 FACING/train/FACING_00560
0 FACING/train/FACING_00566
0 FACING/train/FACING_00570
0 FACING/train/FACING_00619
0 FACING/train/FACING_00647
0 FACING/train/FACING_00673
0 FACING/train/FACING_00680
0 FACING/train/FACING_00681
0 FACING/train/FACING_00690
0 FACING/train/FACING_00713
0 FACING/train/FACING_00772
0 FACING/train/FACING_00804
0 FACING/train/FACING_00810
0 FACING/train/FACING_00829
0 FACING/train/FACING_00855
0 FACING/train/FACING_00874
0 FACING/train/FACING_00933
0 FACING/train/FACING_00946
0 FAMILIES/test/FAMILIES_00001
0 FAMILIES/train/FAMILIES_00064
0 FAMILIES/train/FAMILIES_00067
0 FAMILIES/train/FAMILIES_00121
0 FAMILIES/train/FAMILIES_00163
0 FAMILIES/train/FAMILIES_00178
0 FAMILIES/train/FAMILIES_00183
0 FAMILIES/train/FAMILIES_00203
0 FAMILIES/train/FAMILIES_00218
0 FAMILIES/train/FAMILIES_00270
0 FAMILIES/train/FAMILIES_00359
0 FAMILIES/train/FAMILIES_00437
0 FAMILIES/train/FAMILIES_00482
0 FAMILIES/train/FAMILIES_00496
0 FAMILIES/train/FAMILIES_00548
0 FAMILIES/train/FAMILIES_00622
0 FAMILIES/train/FAMILIES_00728
0 FAMILIES/train/FAMILIES_00760
0 FAMILIES/train/FAMILIES_00796
0 FAMILIES/train/FAMILIES_00928
0 FAMILIES/train/FAMILIES_00936
0 FAMILY/test/FAMILY_00010
0 FAMILY/test/FAMILY_00034
0 FAMILY/train/FAMILY_00070
0 FAMILY/train/FAMILY_00087
0 FAMILY/train/FAMILY_00089
0 FAMILY/train/FAMILY_00093
0 FAMILY/train/FAMILY_00115
0 FAMILY/train/FAMILY_00132
0 FAMILY/train/FAMILY_00137
0 FAMILY/train/FAMILY_00189
0 FAMILY/train/FAMILY_00249
0 FAMILY/train/FAMILY_00280
0 FAMILY/train/FAMILY_00306
0 FAMILY/train/FAMILY_00427
0 FAMILY/train/FAMILY_00437
0 FAMILY/train/FAMILY_00453
0 FAMILY/train/FAMILY_00488
0 FAMILY/train/FAMILY_00491
0 FAMILY/train/FAMILY_00503
0 FAMILY/train/FAMILY_00548
0 FAMILY/train/FAMILY_00612
0 FAMILY/train/FAMILY_00670
0 FAMILY/train/FAMILY_00679
0 FAMILY/train/FAMILY_00680
0 FAMILY/train/FAMILY_00716
0 FAMILY/train/FAMILY_00731
0 FAMILY/train/FAMILY_00749
0 FAMILY/train/FAMILY_00785
0 FAMILY/train/FAMILY_00795
0 FAMILY/train/FAMILY_00812
0 FAMILY/train/FAMILY_00829
0 FAMILY/train/FAMILY_00841
0 FAMILY/train/FAMILY_00853
0 FAMILY/train/FAMILY_00855
0 FAMILY/train/FAMILY_00956
0 FAMILY/val/FAMILY_00039
0 FIGHTING/test/FIGHTING_00009
0 FIGHTING/test/FIGHTING_00040
0 FIGHTING/train/FIGHTING_00022
0 FIGHTING/train/FIGHTING_00027
0 FIGHTING/train/FIGHTING_00057
0 FIGHTING/train/FIGHTING_00064
0 FIGHTING/train/FIGHTING_00069
0 FIGHTING/train/FIGHTING_00079
0 FIGHTING/train/FIGHTING_00093
0 FIGHTING/train/FIGHTING_00100
0 FIGHTING/train/FIGHTING_00102
0 FIGHTING/train/FIGHTING_00105
0 FIGHTING/train/FIGHTING_00164
0 FIGHTING/train/FIGHTING_00232
0 FIGHTING/train/FIGHTING_00233
0 FIGHTING/train/FIGHTING_00277
0 FIGHTING/train/FIGHTING_00295
0 FIGHTING/train/FIGHTING_00358
0 FIGHTING/train/FIGHTING_00365
0 FIGHTING/train/FIGHTING_00394
0 FIGHTING/train/FIGHTING_00450
0 FIGHTING/train/FIGHTING_00453
0 FIGHTING/train/FIGHTING_00467
0 FIGHTING/train/FIGHTING_00469
0 FIGHTING/train/FIGHTING_00488
0 FIGHTING/train/FIGHTING_00492
0 FIGHTING/train/FIGHTING_00496
0 FIGHTING/train/FIGHTING_00509
0 FIGHTING/train/FIGHTING_00512
0 FIGHTING/train/FIGHTING_00548
0 FIGHTING/train/FIGHTING_00550
0 FIGHTING/train/FIGHTING_00585
0 FIGHTING/train/FIGHTING_00602
0 FIGHTING/train/FIGHTING_00614
0 FIGHTING/train/FIGHTING_00641
0 FIGHTING/train/FIGHTING_00649
0 FIGHTING/train/FIGHTING_00652
0 FIGHTING/train/FIGHTING_00663
0 FIGHTING/train/FIGHTING_00674
0 FIGHTING/train/FIGHTING_00683
0 FIGHTING/train/FIGHTING_00690
0 FIGHTING/train/FIGHTING_00715
0 FIGHTING/train/FIGHTING_00737
0 FIGHTING/train/FIGHTING_00796
0 FIGHTING/train/FIGHTING_00821
0 FIGHTING/train/FIGHTING_00829
0 FIGHTING/train/FIGHTING_00873
0 FIGHTING/train/FIGHTING_00876
0 FIGHTING/train/FIGHTING_00885
0 FIGHTING/train/FIGHTING_00891
0 FIGHTING/train/FIGHTING_00901
0 FIGHTING/train/FIGHTING_00920
0 FIGHTING/train/FIGHTING_00928
0 FIGHTING/train/FIGHTING_00941
0 FIGHTING/train/FIGHTING_00966
0 FIGHTING/train/FIGHTING_00968
0 FIGHTING/val/FIGHTING_00008
0 FIGHT/test/FIGHT_00035
0 FIGHT/train/FIGHT_00117
0 FIGHT/train/FIGHT_00176
0 FIGHT/train/FIGHT_00218
0 FIGHT/train/FIGHT_00242
0 FIGHT/train/FIGHT_00256
0 FIGHT/train/FIGHT_00312
0 FIGHT/train/FIGHT_00397
0 FIGHT/train/FIGHT_00413
0 FIGHT/train/FIGHT_00468
0 FIGHT/train/FIGHT_00482
0 FIGHT/train/FIGHT_00485
0 FIGHT/train/FIGHT_00499
0 FIGHT/train/FIGHT_00530
0 FIGHT/train/FIGHT_00560
0 FIGHT/train/FIGHT_00575
0 FIGHT/train/FIGHT_00601
0 FIGHT/train/FIGHT_00653
0 FIGHT/train/FIGHT_00734
0 FIGHT/train/FIGHT_00735
0 FIGHT/train/FIGHT_00825
0 FIGHT/train/FIGHT_00877
0 FIGHT/val/FIGHT_00014
0 FIGHT/val/FIGHT_00017
0 FIGHT/val/FIGHT_00031
0 FIGHT/val/FIGHT_00035
0 FIGHT/val/FIGHT_00050
0 FIGURES/train/FIGURES_00005
0 FIGURES/train/FIGURES_00099
0 FIGURES/train/FIGURES_00154
0 FIGURES/train/FIGURES_00159
0 FIGURES/train/FIGURES_00163
0 FIGURES/train/FIGURES_00182
0 FIGURES/train/FIGURES_00187
0 FIGURES/train/FIGURES_00193
0 FIGURES/train/FIGURES_00270
0 FIGURES/train/FIGURES_00299
0 FIGURES/train/FIGURES_00305
0 FIGURES/train/FIGURES_00320
0 FIGURES/train/FIGURES_00372
0 FIGURES/train/FIGURES_00385
0 FIGURES/train/FIGURES_00391
0 FIGURES/train/FIGURES_00403
0 FIGURES/train/FIGURES_00410
0 FIGURES/train/FIGURES_00426
0 FIGURES/train/FIGURES_00472
0 FIGURES/train/FIGURES_00525
0 FIGURES/train/FIGURES_00536
0 FIGURES/train/FIGURES_00571
0 FIGURES/train/FIGURES_00585
0 FIGURES/train/FIGURES_00594
0 FIGURES/train/FIGURES_00616
0 FIGURES/train/FIGURES_00617
0 FIGURES/train/FIGURES_00630
0 FIGURES/train/FIGURES_00633
0 FIGURES/train/FIGURES_00637
0 FIGURES/train/FIGURES_00642
0 FIGURES/train/FIGURES_00653
0 FIGURES/train/FIGURES_00689
0 FIGURES/train/FIGURES_00713
0 FIGURES/train/FIGURES_00720
0 FIGURES/train/FIGURES_00723
0 FIGURES/train/FIGURES_00745
0 FIGURES/train/FIGURES_00746
0 FIGURES/train/FIGURES_00769
0 FIGURES/train/FIGURES_00799
0 FIGURES/train/FIGURES_00820
0 FIGURES/train/FIGURES_00839
0 FIGURES/train/FIGURES_00884
0 FIGURES/train/FIGURES_00886
0 FIGURES/train/FIGURES_00895
0 FIGURES/train/FIGURES_00906
0 FIGURES/train/FIGURES_00927
0 FIGURES/train/FIGURES_00964
0 FIGURES/train/FIGURES_00969
0 FIGURES/train/FIGURES_00973
0 FIGURES/val/FIGURES_00010
0 FIGURES/val/FIGURES_00033
0 FINAL/test/FINAL_00002
0 FINAL/train/FINAL_00029
0 FINAL/train/FINAL_00039
0 FINAL/train/FINAL_00081
0 FINAL/train/FINAL_00092
0 FINAL/train/FINAL_00099
0 FINAL/train/FINAL_00104
0 FINAL/train/FINAL_00120
0 FINAL/train/FINAL_00127
0 FINAL/train/FINAL_00192
0 FINAL/train/FINAL_00210
0 FINAL/train/FINAL_00232
0 FINAL/train/FINAL_00251
0 FINAL/train/FINAL_00258
0 FINAL/train/FINAL_00271
0 FINAL/train/FINAL_00286
0 FINAL/train/FINAL_00311
0 FINAL/train/FINAL_00323
0 FINAL/train/FINAL_00374
0 FINAL/train/FINAL_00412
0 FINAL/train/FINAL_00415
0 FINAL/train/FINAL_00418
0 FINAL/train/FINAL_00476
0 FINAL/train/FINAL_00484
0 FINAL/train/FINAL_00500
0 FINAL/train/FINAL_00547
0 FINAL/train/FINAL_00558
0 FINAL/train/FINAL_00566
0 FINAL/train/FINAL_00582
0 FINAL/train/FINAL_00643
0 FINAL/train/FINAL_00650
0 FINAL/train/FINAL_00669
0 FINAL/train/FINAL_00670
0 FINAL/train/FINAL_00702
0 FINAL/train/FINAL_00722
0 FINAL/train/FINAL_00736
0 FINAL/train/FINAL_00771
0 FINAL/train/FINAL_00774
0 FINAL/train/FINAL_00798
0 FINAL/train/FINAL_00800
0 FINAL/train/FINAL_00809
0 FINAL/train/FINAL_00813
0 FINAL/train/FINAL_00841
0 FINAL/train/FINAL_00870
0 FINAL/train/FINAL_00878
0 FINAL/train/FINAL_00906
0 FINAL/train/FINAL_00946
0 FINANCIAL/test/FINANCIAL_00007
0 FINANCIAL/test/FINANCIAL_00015
0 FINANCIAL/test/FINANCIAL_00037
0 FINANCIAL/test/FINANCIAL_00045
0 FINANCIAL/train/FINANCIAL_00002
0 FINANCIAL/train/FINANCIAL_00019
0 FINANCIAL/train/FINANCIAL_00068
0 FINANCIAL/train/FINANCIAL_00077
0 FINANCIAL/train/FINANCIAL_00093
0 FINANCIAL/train/FINANCIAL_00118
0 FINANCIAL/train/FINANCIAL_00120
0 FINANCIAL/train/FINANCIAL_00157
0 FINANCIAL/train/FINANCIAL_00169
0 FINANCIAL/train/FINANCIAL_00185
0 FINANCIAL/train/FINANCIAL_00192
0 FINANCIAL/train/FINANCIAL_00196
0 FINANCIAL/train/FINANCIAL_00206
0 FINANCIAL/train/FINANCIAL_00219
0 FINANCIAL/train/FINANCIAL_00221
0 FINANCIAL/train/FINANCIAL_00223
0 FINANCIAL/train/FINANCIAL_00249
0 FINANCIAL/train/FINANCIAL_00296
0 FINANCIAL/train/FINANCIAL_00309
0 FINANCIAL/train/FINANCIAL_00342
0 FINANCIAL/train/FINANCIAL_00346
0 FINANCIAL/train/FINANCIAL_00347
0 FINANCIAL/train/FINANCIAL_00353
0 FINANCIAL/train/FINANCIAL_00380
0 FINANCIAL/train/FINANCIAL_00388
0 FINANCIAL/train/FINANCIAL_00390
0 FINANCIAL/train/FINANCIAL_00405
0 FINANCIAL/train/FINANCIAL_00417
0 FINANCIAL/train/FINANCIAL_00443
0 FINANCIAL/train/FINANCIAL_00465
0 FINANCIAL/train/FINANCIAL_00488
0 FINANCIAL/train/FINANCIAL_00517
0 FINANCIAL/train/FINANCIAL_00525
0 FINANCIAL/train/FINANCIAL_00526
0 FINANCIAL/train/FINANCIAL_00534
0 FINANCIAL/train/FINANCIAL_00536
0 FINANCIAL/train/FINANCIAL_00547
0 FINANCIAL/train/FINANCIAL_00565
0 FINANCIAL/train/FINANCIAL_00591
0 FINANCIAL/train/FINANCIAL_00605
0 FINANCIAL/train/FINANCIAL_00611
0 FINANCIAL/train/FINANCIAL_00617
0 FINANCIAL/train/FINANCIAL_00685
0 FINANCIAL/train/FINANCIAL_00706
0 FINANCIAL/train/FINANCIAL_00708
0 FINANCIAL/train/FINANCIAL_00726
0 FINANCIAL/train/FINANCIAL_00737
0 FINANCIAL/train/FINANCIAL_00766
0 FINANCIAL/train/FINANCIAL_00834
0 FINANCIAL/train/FINANCIAL_00854
0 FINANCIAL/train/FINANCIAL_00887
0 FINANCIAL/train/FINANCIAL_00892
0 FINANCIAL/train/FINANCIAL_00896
0 FINANCIAL/train/FINANCIAL_00919
0 FINANCIAL/train/FINANCIAL_00928
0 FINANCIAL/train/FINANCIAL_00967
0 FINANCIAL/train/FINANCIAL_00979
0 FIRST/test/FIRST_00003
0 FIRST/train/FIRST_00047
0 FIRST/train/FIRST_00061
0 FIRST/train/FIRST_00095
0 FIRST/train/FIRST_00096
0 FIRST/train/FIRST_00114
0 FIRST/train/FIRST_00144
0 FIRST/train/FIRST_00152
0 FIRST/train/FIRST_00170
0 FIRST/train/FIRST_00185
0 FIRST/train/FIRST_00200
0 FIRST/train/FIRST_00220
0 FIRST/train/FIRST_00237
0 FIRST/train/FIRST_00239
0 FIRST/train/FIRST_00244
0 FIRST/train/FIRST_00290
0 FIRST/train/FIRST_00295
0 FIRST/train/FIRST_00308
0 FIRST/train/FIRST_00319
0 FIRST/train/FIRST_00363
0 FIRST/train/FIRST_00397
0 FIRST/train/FIRST_00417
0 FIRST/train/FIRST_00422
0 FIRST/train/FIRST_00429
0 FIRST/train/FIRST_00455
0 FIRST/train/FIRST_00477
0 FIRST/train/FIRST_00520
0 FIRST/train/FIRST_00523
0 FIRST/train/FIRST_00548
0 FIRST/train/FIRST_00549
0 FIRST/train/FIRST_00558
0 FIRST/train/FIRST_00571
0 FIRST/train/FIRST_00582
0 FIRST/train/FIRST_00623
0 FIRST/train/FIRST_00657
0 FIRST/train/FIRST_00671
0 FIRST/train/FIRST_00675
0 FIRST/train/FIRST_00683
0 FIRST/train/FIRST_00702
0 FIRST/train/FIRST_00751
0 FIRST/train/FIRST_00759
0 FIRST/train/FIRST_00806
0 FIRST/train/FIRST_00809
0 FIRST/train/FIRST_00825
0 FIRST/train/FIRST_00834
0 FIRST/train/FIRST_00880
0 FIRST/train/FIRST_00933
0 FIRST/train/FIRST_00935
0 FIRST/train/FIRST_00974
0 FIRST/train/FIRST_00977
0 FIRST/train/FIRST_00991
0 FIRST/val/FIRST_00044
0 FOCUS/test/FOCUS_00009
0 FOCUS/test/FOCUS_00016
0 FOCUS/train/FOCUS_00011
0 FOCUS/train/FOCUS_00077
0 FOCUS/train/FOCUS_00089
0 FOCUS/train/FOCUS_00090
0 FOCUS/train/FOCUS_00140
0 FOCUS/train/FOCUS_00159
0 FOCUS/train/FOCUS_00176
0 FOCUS/train/FOCUS_00178
0 FOCUS/train/FOCUS_00283
0 FOCUS/train/FOCUS_00341
0 FOCUS/train/FOCUS_00349
0 FOCUS/train/FOCUS_00363
0 FOCUS/train/FOCUS_00366
0 FOCUS/train/FOCUS_00367
0 FOCUS/train/FOCUS_00388
0 FOCUS/train/FOCUS_00463
0 FOCUS/train/FOCUS_00498
0 FOCUS/train/FOCUS_00562
0 FOCUS/train/FOCUS_00580
0 FOCUS/train/FOCUS_00617
0 FOCUS/train/FOCUS_00635
0 FOCUS/train/FOCUS_00638
0 FOCUS/train/FOCUS_00662
0 FOCUS/train/FOCUS_00664
0 FOCUS/train/FOCUS_00673
0 FOCUS/train/FOCUS_00677
0 FOCUS/train/FOCUS_00695
0 FOCUS/train/FOCUS_00723
0 FOCUS/train/FOCUS_00735
0 FOCUS/train/FOCUS_00826
0 FOCUS/train/FOCUS_00843
0 FOCUS/train/FOCUS_00863
0 FOCUS/train/FOCUS_00887
0 FOLLOWING/test/FOLLOWING_00009
0 FOLLOWING/test/FOLLOWING_00019
0 FOLLOWING/test/FOLLOWING_00025
0 FOLLOWING/test/FOLLOWING_00036
0 FOLLOWING/test/FOLLOWING_00037
0 FOLLOWING/test/FOLLOWING_00048
0 FOLLOWING/test/FOLLOWING_00050
0 FOLLOWING/train/FOLLOWING_00026
0 FOLLOWING/train/FOLLOWING_00031
0 FOLLOWING/train/FOLLOWING_00045
0 FOLLOWING/train/FOLLOWING_00068
0 FOLLOWING/train/FOLLOWING_00097
0 FOLLOWING/train/FOLLOWING_00120
0 FOLLOWING/train/FOLLOWING_00122
0 FOLLOWING/train/FOLLOWING_00124
0 FOLLOWING/train/FOLLOWING_00130
0 FOLLOWING/train/FOLLOWING_00131
0 FOLLOWING/train/FOLLOWING_00136
0 FOLLOWING/train/FOLLOWING_00144
0 FOLLOWING/train/FOLLOWING_00160
0 FOLLOWING/train/FOLLOWING_00176
0 FOLLOWING/train/FOLLOWING_00183
0 FOLLOWING/train/FOLLOWING_00202
0 FOLLOWING/train/FOLLOWING_00206
0 FOLLOWING/train/FOLLOWING_00208
0 FOLLOWING/train/FOLLOWING_00212
0 FOLLOWING/train/FOLLOWING_00223
0 FOLLOWING/train/FOLLOWING_00230
0 FOLLOWING/train/FOLLOWING_00231
0 FOLLOWING/train/FOLLOWING_00236
0 FOLLOWING/train/FOLLOWING_00239
0 FOLLOWING/train/FOLLOWING_00243
0 FOLLOWING/train/FOLLOWING_00248
0 FOLLOWING/train/FOLLOWING_00256
0 FOLLOWING/train/FOLLOWING_00260
0 FOLLOWING/train/FOLLOWING_00279
0 FOLLOWING/train/FOLLOWING_00286
0 FOLLOWING/train/FOLLOWING_00301
0 FOLLOWING/train/FOLLOWING_00305
0 FOLLOWING/train/FOLLOWING_00311
0 FOLLOWING/train/FOLLOWING_00315
0 FOLLOWING/train/FOLLOWING_00324
0 FOLLOWING/train/FOLLOWING_00327
0 FOLLOWING/train/FOLLOWING_00328
0 FOLLOWING/train/FOLLOWING_00345
0 FOLLOWING/train/FOLLOWING_00355
0 FOLLOWING/train/FOLLOWING_00377
0 FOLLOWING/train/FOLLOWING_00383
0 FOLLOWING/train/FOLLOWING_00396
0 FOLLOWING/train/FOLLOWING_00400
0 FOLLOWING/train/FOLLOWING_00414
0 FOLLOWING/train/FOLLOWING_00418
0 FOLLOWING/train/FOLLOWING_00424
0 FOLLOWING/train/FOLLOWING_00448
0 FOLLOWING/train/FOLLOWING_00451
0 FOLLOWING/train/FOLLOWING_00467
0 FOLLOWING/train/FOLLOWING_00472
0 FOLLOWING/train/FOLLOWING_00477
0 FOLLOWING/train/FOLLOWING_00487
0 FOLLOWING/train/FOLLOWING_00493
0 FOLLOWING/train/FOLLOWING_00530
0 FOLLOWING/train/FOLLOWING_00539
0 FOLLOWING/train/FOLLOWING_00557
0 FOLLOWING/train/FOLLOWING_00570
0 FOLLOWING/train/FOLLOWING_00574
0 FOLLOWING/train/FOLLOWING_00584
0 FOLLOWING/train/FOLLOWING_00585
0 FOLLOWING/train/FOLLOWING_00589
0 FOLLOWING/train/FOLLOWING_00606
0 FOLLOWING/train/FOLLOWING_00608
0 FOLLOWING/train/FOLLOWING_00609
0 FOLLOWING/train/FOLLOWING_00615
0 FOLLOWING/train/FOLLOWING_00633
0 FOLLOWING/train/FOLLOWING_00652
0 FOLLOWING/train/FOLLOWING_00657
0 FOLLOWING/train/FOLLOWING_00669
0 FOLLOWING/train/FOLLOWING_00672
0 FOLLOWING/train/FOLLOWING_00717
0 FOLLOWING/train/FOLLOWING_00720
0 FOLLOWING/train/FOLLOWING_00722
0 FOLLOWING/train/FOLLOWING_00724
0 FOLLOWING/train/FOLLOWING_00732
0 FOLLOWING/train/FOLLOWING_00735
0 FOLLOWING/train/FOLLOWING_00736
0 FOLLOWING/train/FOLLOWING_00751
0 FOLLOWING/train/FOLLOWING_00753
0 FOLLOWING/train/FOLLOWING_00754
0 FOLLOWING/train/FOLLOWING_00760
0 FOLLOWING/train/FOLLOWING_00763
0 FOLLOWING/train/FOLLOWING_00778
0 FOLLOWING/train/FOLLOWING_00786
0 FOLLOWING/train/FOLLOWING_00792
0 FOLLOWING/train/FOLLOWING_00799
0 FOLLOWING/train/FOLLOWING_00827
0 FOLLOWING/train/FOLLOWING_00838
0 FOLLOWING/train/FOLLOWING_00884
0 FOLLOWING/train/FOLLOWING_00890
0 FOLLOWING/train/FOLLOWING_00892
0 FOLLOWING/train/FOLLOWING_00910
0 FOLLOWING/train/FOLLOWING_00913
0 FOLLOWING/train/FOLLOWING_00922
0 FOLLOWING/train/FOLLOWING_00931
0 FOLLOWING/train/FOLLOWING_00932
0 FOLLOWING/train/FOLLOWING_00937
0 FOLLOWING/train/FOLLOWING_00939
0 FOLLOWING/train/FOLLOWING_00943
0 FOLLOWING/train/FOLLOWING_00949
0 FOLLOWING/train/FOLLOWING_00951
0 FOLLOWING/train/FOLLOWING_00986
0 FOLLOWING/train/FOLLOWING_00988
0 FOLLOWING/train/FOLLOWING_00991
0 FOLLOWING/train/FOLLOWING_00996
0 FOLLOWING/train/FOLLOWING_00999
0 FOLLOWING/val/FOLLOWING_00002
0 FOLLOWING/val/FOLLOWING_00013
0 FOLLOWING/val/FOLLOWING_00026
0 FOOTBALL/train/FOOTBALL_00037
0 FOOTBALL/train/FOOTBALL_00059
0 FOOTBALL/train/FOOTBALL_00070
0 FOOTBALL/train/FOOTBALL_00075
0 FOOTBALL/train/FOOTBALL_00104
0 FOOTBALL/train/FOOTBALL_00107
0 FOOTBALL/train/FOOTBALL_00121
0 FOOTBALL/train/FOOTBALL_00125
0 FOOTBALL/train/FOOTBALL_00126
0 FOOTBALL/train/FOOTBALL_00128
0 FOOTBALL/train/FOOTBALL_00138
0 FOOTBALL/train/FOOTBALL_00140
0 FOOTBALL/train/FOOTBALL_00145
0 FOOTBALL/train/FOOTBALL_00157
0 FOOTBALL/train/FOOTBALL_00160
0 FOOTBALL/train/FOOTBALL_00165
0 FOOTBALL/train/FOOTBALL_00169
0 FOOTBALL/train/FOOTBALL_00205
0 FOOTBALL/train/FOOTBALL_00218
0 FOOTBALL/train/FOOTBALL_00226
0 FOOTBALL/train/FOOTBALL_00228
0 FOOTBALL/train/FOOTBALL_00233
0 FOOTBALL/train/FOOTBALL_00234
0 FOOTBALL/train/FOOTBALL_00241
0 FOOTBALL/train/FOOTBALL_00257
0 FOOTBALL/train/FOOTBALL_00266
0 FOOTBALL/train/FOOTBALL_00273
0 FOOTBALL/train/FOOTBALL_00275
0 FOOTBALL/train/FOOTBALL_00305
0 FOOTBALL/train/FOOTBALL_00307
0 FOOTBALL/train/FOOTBALL_00327
0 FOOTBALL/train/FOOTBALL_00329
0 FOOTBALL/train/FOOTBALL_00333
0 FOOTBALL/train/FOOTBALL_00376
0 FOOTBALL/train/FOOTBALL_00385
0 FOOTBALL/train/FOOTBALL_00458
0 FOOTBALL/train/FOOTBALL_00463
0 FOOTBALL/train/FOOTBALL_00475
0 FOOTBALL/train/FOOTBALL_00493
0 FOOTBALL/train/FOOTBALL_00494
0 FOOTBALL/train/FOOTBALL_00501
0 FOOTBALL/train/FOOTBALL_00509
0 FOOTBALL/train/FOOTBALL_00533
0 FOOTBALL/train/FOOTBALL_00535
0 FOOTBALL/train/FOOTBALL_00588
0 FOOTBALL/train/FOOTBALL_00590
0 FOOTBALL/train/FOOTBALL_00601
0 FOOTBALL/train/FOOTBALL_00645
0 FOOTBALL/train/FOOTBALL_00646
0 FOOTBALL/train/FOOTBALL_00657
0 FOOTBALL/train/FOOTBALL_00677
0 FOOTBALL/train/FOOTBALL_00679
0 FOOTBALL/train/FOOTBALL_00687
0 FOOTBALL/train/FOOTBALL_00711
0 FOOTBALL/train/FOOTBALL_00727
0 FOOTBALL/train/FOOTBALL_00731
0 FOOTBALL/train/FOOTBALL_00764
0 FOOTBALL/train/FOOTBALL_00790
0 FOOTBALL/train/FOOTBALL_00796
0 FOOTBALL/train/FOOTBALL_00800
0 FOOTBALL/train/FOOTBALL_00817
0 FOOTBALL/train/FOOTBALL_00822
0 FOOTBALL/train/FOOTBALL_00829
0 FOOTBALL/train/FOOTBALL_00830
0 FOOTBALL/train/FOOTBALL_00838
0 FOOTBALL/train/FOOTBALL_00860
0 FOOTBALL/train/FOOTBALL_00863
0 FOOTBALL/train/FOOTBALL_00877
0 FOOTBALL/train/FOOTBALL_00878
0 FOOTBALL/train/FOOTBALL_00902
0 FOOTBALL/train/FOOTBALL_00922
0 FOOTBALL/train/FOOTBALL_00928
0 FOOTBALL/train/FOOTBALL_00931
0 FOOTBALL/train/FOOTBALL_00936
0 FOOTBALL/train/FOOTBALL_00947
0 FOOTBALL/train/FOOTBALL_00965
0 FOOTBALL/train/FOOTBALL_00969
0 FOOTBALL/train/FOOTBALL_00977
0 FOOTBALL/train/FOOTBALL_00979
0 FOOTBALL/train/FOOTBALL_00998
0 FOOTBALL/val/FOOTBALL_00019
0 FORCES/test/FORCES_00004
0 FORCES/train/FORCES_00001
0 FORCES/train/FORCES_00066
0 FORCES/train/FORCES_00141
0 FORCES/train/FORCES_00154
0 FORCES/train/FORCES_00168
0 FORCES/train/FORCES_00174
0 FORCES/train/FORCES_00179
0 FORCES/train/FORCES_00190
0 FORCES/train/FORCES_00203
0 FORCES/train/FORCES_00215
0 FORCES/train/FORCES_00229
0 FORCES/train/FORCES_00270
0 FORCES/train/FORCES_00272
0 FORCES/train/FORCES_00276
0 FORCES/train/FORCES_00346
0 FORCES/train/FORCES_00387
0 FORCES/train/FORCES_00405
0 FORCES/train/FORCES_00428
0 FORCES/train/FORCES_00429
0 FORCES/train/FORCES_00494
0 FORCES/train/FORCES_00505
0 FORCES/train/FORCES_00518
0 FORCES/train/FORCES_00519
0 FORCES/train/FORCES_00522
0 FORCES/train/FORCES_00524
0 FORCES/train/FORCES_00528
0 FORCES/train/FORCES_00552
0 FORCES/train/FORCES_00574
0 FORCES/train/FORCES_00614
0 FORCES/train/FORCES_00623
0 FORCES/train/FORCES_00625
0 FORCES/train/FORCES_00643
0 FORCES/train/FORCES_00655
0 FORCES/train/FORCES_00669
0 FORCES/train/FORCES_00694
0 FORCES/train/FORCES_00711
0 FORCES/train/FORCES_00755
0 FORCES/train/FORCES_00757
0 FORCES/train/FORCES_00773
0 FORCES/train/FORCES_00774
0 FORCES/train/FORCES_00784
0 FORCES/train/FORCES_00818
0 FORCES/train/FORCES_00824
0 FORCES/train/FORCES_00832
0 FORCES/train/FORCES_00844
0 FORCES/train/FORCES_00852
0 FORCES/train/FORCES_00858
0 FORCES/train/FORCES_00883
0 FORCES/train/FORCES_00896
0 FORCES/train/FORCES_00900
0 FORCES/train/FORCES_00920
0 FORCES/train/FORCES_00921
0 FORCES/train/FORCES_00943
0 FORCES/train/FORCES_00949
0 FORCES/train/FORCES_00961
0 FORCES/train/FORCES_00971
0 FORCES/train/FORCES_00972
0 FORCES/train/FORCES_00988
0 FORCES/train/FORCES_00991
0 FORCES/val/FORCES_00005
0 FORCES/val/FORCES_00019
0 FORCE/test/FORCE_00025
0 FORCE/train/FORCE_00102
0 FORCE/train/FORCE_00109
0 FORCE/train/FORCE_00131
0 FORCE/train/FORCE_00183
0 FORCE/train/FORCE_00230
0 FORCE/train/FORCE_00255
0 FORCE/train/FORCE_00266
0 FORCE/train/FORCE_00281
0 FORCE/train/FORCE_00289
0 FORCE/train/FORCE_00302
0 FORCE/train/FORCE_00329
0 FORCE/train/FORCE_00338
0 FORCE/train/FORCE_00368
0 FORCE/train/FORCE_00385
0 FORCE/train/FORCE_00485
0 FORCE/train/FORCE_00508
0 FORCE/train/FORCE_00517
0 FORCE/train/FORCE_00542
0 FORCE/train/FORCE_00587
0 FORCE/train/FORCE_00603
0 FORCE/train/FORCE_00627
0 FORCE/train/FORCE_00629
0 FORCE/train/FORCE_00646
0 FORCE/train/FORCE_00671
0 FORCE/train/FORCE_00695
0 FORCE/train/FORCE_00710
0 FORCE/train/FORCE_00754
0 FORCE/train/FORCE_00766
0 FORCE/train/FORCE_00812
0 FORCE/train/FORCE_00837
0 FORCE/train/FORCE_00895
0 FORCE/train/FORCE_00913
0 FORCE/train/FORCE_00914
0 FORCE/train/FORCE_00925
0 FORCE/train/FORCE_00933
0 FORCE/train/FORCE_00965
0 FORCE/train/FORCE_00969
0 FOREIGN/test/FOREIGN_00025
0 FOREIGN/test/FOREIGN_00032
0 FOREIGN/train/FOREIGN_00026
0 FOREIGN/train/FOREIGN_00051
0 FOREIGN/train/FOREIGN_00091
0 FOREIGN/train/FOREIGN_00101
0 FOREIGN/train/FOREIGN_00117
0 FOREIGN/train/FOREIGN_00137
0 FOREIGN/train/FOREIGN_00168
0 FOREIGN/train/FOREIGN_00179
0 FOREIGN/train/FOREIGN_00191
0 FOREIGN/train/FOREIGN_00256
0 FOREIGN/train/FOREIGN_00285
0 FOREIGN/train/FOREIGN_00348
0 FOREIGN/train/FOREIGN_00385
0 FOREIGN/train/FOREIGN_00404
0 FOREIGN/train/FOREIGN_00415
0 FOREIGN/train/FOREIGN_00428
0 FOREIGN/train/FOREIGN_00463
0 FOREIGN/train/FOREIGN_00489
0 FOREIGN/train/FOREIGN_00490
0 FOREIGN/train/FOREIGN_00537
0 FOREIGN/train/FOREIGN_00553
0 FOREIGN/train/FOREIGN_00568
0 FOREIGN/train/FOREIGN_00571
0 FOREIGN/train/FOREIGN_00597
0 FOREIGN/train/FOREIGN_00642
0 FOREIGN/train/FOREIGN_00731
0 FOREIGN/train/FOREIGN_00755
0 FOREIGN/train/FOREIGN_00760
0 FOREIGN/train/FOREIGN_00765
0 FOREIGN/train/FOREIGN_00777
0 FOREIGN/train/FOREIGN_00778
0 FOREIGN/train/FOREIGN_00799
0 FOREIGN/train/FOREIGN_00835
0 FOREIGN/train/FOREIGN_00836
0 FOREIGN/train/FOREIGN_00865
0 FOREIGN/train/FOREIGN_00866
0 FOREIGN/train/FOREIGN_00886
0 FOREIGN/train/FOREIGN_00893
0 FOREIGN/train/FOREIGN_00925
0 FOREIGN/train/FOREIGN_00930
0 FOREIGN/train/FOREIGN_00934
0 FOREIGN/train/FOREIGN_00946
0 FOREIGN/train/FOREIGN_00955
0 FOREIGN/train/FOREIGN_00957
0 FOREIGN/train/FOREIGN_00993
0 FOREIGN/val/FOREIGN_00023
0 FOREIGN/val/FOREIGN_00031
0 FOREIGN/val/FOREIGN_00042
0 FORMER/test/FORMER_00001
0 FORMER/test/FORMER_00009
0 FORMER/test/FORMER_00029
0 FORMER/test/FORMER_00034
0 FORMER/train/FORMER_00001
0 FORMER/train/FORMER_00008
0 FORMER/train/FORMER_00013
0 FORMER/train/FORMER_00034
0 FORMER/train/FORMER_00036
0 FORMER/train/FORMER_00043
0 FORMER/train/FORMER_00097
0 FORMER/train/FORMER_00133
0 FORMER/train/FORMER_00149
0 FORMER/train/FORMER_00159
0 FORMER/train/FORMER_00166
0 FORMER/train/FORMER_00180
0 FORMER/train/FORMER_00187
0 FORMER/train/FORMER_00209
0 FORMER/train/FORMER_00223
0 FORMER/train/FORMER_00225
0 FORMER/train/FORMER_00236
0 FORMER/train/FORMER_00250
0 FORMER/train/FORMER_00251
0 FORMER/train/FORMER_00254
0 FORMER/train/FORMER_00264
0 FORMER/train/FORMER_00272
0 FORMER/train/FORMER_00277
0 FORMER/train/FORMER_00290
0 FORMER/train/FORMER_00293
0 FORMER/train/FORMER_00295
0 FORMER/train/FORMER_00301
0 FORMER/train/FORMER_00305
0 FORMER/train/FORMER_00310
0 FORMER/train/FORMER_00325
0 FORMER/train/FORMER_00328
0 FORMER/train/FORMER_00341
0 FORMER/train/FORMER_00346
0 FORMER/train/FORMER_00348
0 FORMER/train/FORMER_00363
0 FORMER/train/FORMER_00375
0 FORMER/train/FORMER_00404
0 FORMER/train/FORMER_00407
0 FORMER/train/FORMER_00409
0 FORMER/train/FORMER_00426
0 FORMER/train/FORMER_00439
0 FORMER/train/FORMER_00440
0 FORMER/train/FORMER_00451
0 FORMER/train/FORMER_00455
0 FORMER/train/FORMER_00464
0 FORMER/train/FORMER_00488
0 FORMER/train/FORMER_00493
0 FORMER/train/FORMER_00499
0 FORMER/train/FORMER_00506
0 FORMER/train/FORMER_00510
0 FORMER/train/FORMER_00521
0 FORMER/train/FORMER_00522
0 FORMER/train/FORMER_00537
0 FORMER/train/FORMER_00546
0 FORMER/train/FORMER_00549
0 FORMER/train/FORMER_00556
0 FORMER/train/FORMER_00564
0 FORMER/train/FORMER_00570
0 FORMER/train/FORMER_00581
0 FORMER/train/FORMER_00586
0 FORMER/train/FORMER_00591
0 FORMER/train/FORMER_00592
0 FORMER/train/FORMER_00603
0 FORMER/train/FORMER_00624
0 FORMER/train/FORMER_00631
0 FORMER/train/FORMER_00632
0 FORMER/train/FORMER_00664
0 FORMER/train/FORMER_00672
0 FORMER/train/FORMER_00677
0 FORMER/train/FORMER_00682
0 FORMER/train/FORMER_00688
0 FORMER/train/FORMER_00689
0 FORMER/train/FORMER_00700
0 FORMER/train/FORMER_00707
0 FORMER/train/FORMER_00712
0 FORMER/train/FORMER_00721
0 FORMER/train/FORMER_00745
0 FORMER/train/FORMER_00750
0 FORMER/train/FORMER_00754
0 FORMER/train/FORMER_00762
0 FORMER/train/FORMER_00766
0 FORMER/train/FORMER_00783
0 FORMER/train/FORMER_00785
0 FORMER/train/FORMER_00790
0 FORMER/train/FORMER_00792
0 FORMER/train/FORMER_00803
0 FORMER/train/FORMER_00805
0 FORMER/train/FORMER_00815
0 FORMER/train/FORMER_00820
0 FORMER/train/FORMER_00821
0 FORMER/train/FORMER_00835
0 FORMER/train/FORMER_00840
0 FORMER/train/FORMER_00854
0 FORMER/train/FORMER_00876
0 FORMER/train/FORMER_00894
0 FORMER/train/FORMER_00914
0 FORMER/train/FORMER_00916
0 FORMER/train/FORMER_00924
0 FORMER/train/FORMER_00934
0 FORMER/train/FORMER_00936
0 FORMER/train/FORMER_00955
0 FORMER/train/FORMER_00985
0 FORMER/train/FORMER_00988
0 FORMER/train/FORMER_00997
0 FORMER/val/FORMER_00006
0 FORMER/val/FORMER_00043
0 FORWARD/train/FORWARD_00058
0 FORWARD/train/FORWARD_00096
0 FORWARD/train/FORWARD_00142
0 FORWARD/train/FORWARD_00214
0 FORWARD/train/FORWARD_00295
0 FORWARD/train/FORWARD_00300
0 FORWARD/train/FORWARD_00319
0 FORWARD/train/FORWARD_00414
0 FORWARD/train/FORWARD_00445
0 FORWARD/train/FORWARD_00713
0 FORWARD/train/FORWARD_00811
0 FORWARD/train/FORWARD_00839
0 FORWARD/train/FORWARD_00887
0 FORWARD/train/FORWARD_00891
0 FORWARD/train/FORWARD_00896
0 FORWARD/train/FORWARD_00947
0 FORWARD/train/FORWARD_00964
0 FORWARD/val/FORWARD_00029
0 FOUND/test/FOUND_00016
0 FOUND/test/FOUND_00023
0 FOUND/test/FOUND_00047
0 FOUND/train/FOUND_00009
0 FOUND/train/FOUND_00013
0 FOUND/train/FOUND_00026
0 FOUND/train/FOUND_00056
0 FOUND/train/FOUND_00105
0 FOUND/train/FOUND_00112
0 FOUND/train/FOUND_00125
0 FOUND/train/FOUND_00141
0 FOUND/train/FOUND_00150
0 FOUND/train/FOUND_00225
0 FOUND/train/FOUND_00250
0 FOUND/train/FOUND_00308
0 FOUND/train/FOUND_00319
0 FOUND/train/FOUND_00337
0 FOUND/train/FOUND_00340
0 FOUND/train/FOUND_00354
0 FOUND/train/FOUND_00379
0 FOUND/train/FOUND_00391
0 FOUND/train/FOUND_00402
0 FOUND/train/FOUND_00434
0 FOUND/train/FOUND_00439
0 FOUND/train/FOUND_00463
0 FOUND/train/FOUND_00471
0 FOUND/train/FOUND_00483
0 FOUND/train/FOUND_00520
0 FOUND/train/FOUND_00521
0 FOUND/train/FOUND_00538
0 FOUND/train/FOUND_00562
0 FOUND/train/FOUND_00565
0 FOUND/train/FOUND_00582
0 FOUND/train/FOUND_00595
0 FOUND/train/FOUND_00611
0 FOUND/train/FOUND_00642
0 FOUND/train/FOUND_00660
0 FOUND/train/FOUND_00679
0 FOUND/train/FOUND_00740
0 FOUND/train/FOUND_00754
0 FOUND/train/FOUND_00773
0 FOUND/train/FOUND_00785
0 FOUND/train/FOUND_00790
0 FOUND/train/FOUND_00791
0 FOUND/train/FOUND_00806
0 FOUND/train/FOUND_00807
0 FOUND/train/FOUND_00812
0 FOUND/train/FOUND_00833
0 FOUND/train/FOUND_00879
0 FOUND/train/FOUND_00893
0 FOUND/train/FOUND_00896
0 FOUND/train/FOUND_00904
0 FOUND/train/FOUND_00911
0 FOUND/train/FOUND_00915
0 FOUND/train/FOUND_00937
0 FOUND/train/FOUND_00978
0 FOUND/train/FOUND_00981
0 FOUND/val/FOUND_00015
0 FOUND/val/FOUND_00037
0 FRANCE/test/FRANCE_00040
0 FRANCE/test/FRANCE_00047
0 FRANCE/train/FRANCE_00019
0 FRANCE/train/FRANCE_00027
0 FRANCE/train/FRANCE_00059
0 FRANCE/train/FRANCE_00069
0 FRANCE/train/FRANCE_00141
0 FRANCE/train/FRANCE_00143
0 FRANCE/train/FRANCE_00170
0 FRANCE/train/FRANCE_00174
0 FRANCE/train/FRANCE_00201
0 FRANCE/train/FRANCE_00209
0 FRANCE/train/FRANCE_00238
0 FRANCE/train/FRANCE_00300
0 FRANCE/train/FRANCE_00314
0 FRANCE/train/FRANCE_00336
0 FRANCE/train/FRANCE_00454
0 FRANCE/train/FRANCE_00471
0 FRANCE/train/FRANCE_00474
0 FRANCE/train/FRANCE_00500
0 FRANCE/train/FRANCE_00519
0 FRANCE/train/FRANCE_00581
0 FRANCE/train/FRANCE_00582
0 FRANCE/train/FRANCE_00584
0 FRANCE/train/FRANCE_00592
0 FRANCE/train/FRANCE_00629
0 FRANCE/train/FRANCE_00668
0 FRANCE/train/FRANCE_00674
0 FRANCE/train/FRANCE_00694
0 FRANCE/train/FRANCE_00700
0 FRANCE/train/FRANCE_00721
0 FRANCE/train/FRANCE_00761
0 FRANCE/train/FRANCE_00782
0 FRANCE/train/FRANCE_00793
0 FRANCE/train/FRANCE_00836
0 FRANCE/train/FRANCE_00859
0 FRANCE/train/FRANCE_00871
0 FRANCE/train/FRANCE_00904
0 FRANCE/train/FRANCE_00907
0 FRANCE/train/FRANCE_00914
0 FRANCE/train/FRANCE_00957
0 FRANCE/train/FRANCE_00979
0 FRANCE/train/FRANCE_00987
0 FRANCE/val/FRANCE_00036
0 FRENCH/test/FRENCH_00035
0 FRENCH/train/FRENCH_00006
0 FRENCH/train/FRENCH_00055
0 FRENCH/train/FRENCH_00096
0 FRENCH/train/FRENCH_00098
0 FRENCH/train/FRENCH_00099
0 FRENCH/train/FRENCH_00214
0 FRENCH/train/FRENCH_00224
0 FRENCH/train/FRENCH_00234
0 FRENCH/train/FRENCH_00262
0 FRENCH/train/FRENCH_00266
0 FRENCH/train/FRENCH_00267
0 FRENCH/train/FRENCH_00298
0 FRENCH/train/FRENCH_00321
0 FRENCH/train/FRENCH_00332
0 FRENCH/train/FRENCH_00345
0 FRENCH/train/FRENCH_00368
0 FRENCH/train/FRENCH_00377
0 FRENCH/train/FRENCH_00398
0 FRENCH/train/FRENCH_00404
0 FRENCH/train/FRENCH_00447
0 FRENCH/train/FRENCH_00450
0 FRENCH/train/FRENCH_00511
0 FRENCH/train/FRENCH_00516
0 FRENCH/train/FRENCH_00520
0 FRENCH/train/FRENCH_00529
0 FRENCH/train/FRENCH_00530
0 FRENCH/train/FRENCH_00557
0 FRENCH/train/FRENCH_00565
0 FRENCH/train/FRENCH_00566
0 FRENCH/train/FRENCH_00586
0 FRENCH/train/FRENCH_00591
0 FRENCH/train/FRENCH_00663
0 FRENCH/train/FRENCH_00731
0 FRENCH/train/FRENCH_00738
0 FRENCH/train/FRENCH_00766
0 FRENCH/train/FRENCH_00774
0 FRENCH/train/FRENCH_00777
0 FRENCH/train/FRENCH_00794
0 FRENCH/train/FRENCH_00842
0 FRENCH/train/FRENCH_00875
0 FRENCH/train/FRENCH_00879
0 FRENCH/train/FRENCH_00887
0 FRENCH/train/FRENCH_00962
0 FRENCH/train/FRENCH_00974
0 FRENCH/train/FRENCH_00986
0 FRENCH/train/FRENCH_00992
0 FRENCH/train/FRENCH_00996
0 FRENCH/train/FRENCH_00999
0 FRIDAY/test/FRIDAY_00027
0 FRIDAY/train/FRIDAY_00041
0 FRIDAY/train/FRIDAY_00123
0 FRIDAY/train/FRIDAY_00126
0 FRIDAY/train/FRIDAY_00150
0 FRIDAY/train/FRIDAY_00182
0 FRIDAY/train/FRIDAY_00249
0 FRIDAY/train/FRIDAY_00389
0 FRIDAY/train/FRIDAY_00411
0 FRIDAY/train/FRIDAY_00459
0 FRIDAY/train/FRIDAY_00478
0 FRIDAY/train/FRIDAY_00521
0 FRIDAY/train/FRIDAY_00609
0 FRIDAY/train/FRIDAY_00628
0 FRIDAY/train/FRIDAY_00635
0 FRIDAY/train/FRIDAY_00777
0 FRIDAY/train/FRIDAY_00785
0 FRIDAY/train/FRIDAY_00806
0 FRIDAY/train/FRIDAY_00810
0 FRIDAY/train/FRIDAY_00843
0 FRIDAY/train/FRIDAY_00873
0 FRONT/train/FRONT_00219
0 FRONT/train/FRONT_00287
0 FRONT/train/FRONT_00298
0 FRONT/train/FRONT_00306
0 FRONT/train/FRONT_00483
0 FRONT/train/FRONT_00486
0 FRONT/train/FRONT_00493
0 FRONT/train/FRONT_00581
0 FRONT/train/FRONT_00595
0 FRONT/train/FRONT_00617
0 FRONT/train/FRONT_00773
0 FRONT/train/FRONT_00857
0 FURTHER/test/FURTHER_00028
0 FURTHER/train/FURTHER_00004
0 FURTHER/train/FURTHER_00065
0 FURTHER/train/FURTHER_00143
0 FURTHER/train/FURTHER_00213
0 FURTHER/train/FURTHER_00239
0 FURTHER/train/FURTHER_00246
0 FURTHER/train/FURTHER_00254
0 FURTHER/train/FURTHER_00265
0 FURTHER/train/FURTHER_00279
0 FURTHER/train/FURTHER_00375
0 FURTHER/train/FURTHER_00405
0 FURTHER/train/FURTHER_00494
0 FURTHER/train/FURTHER_00505
0 FURTHER/train/FURTHER_00543
0 FURTHER/train/FURTHER_00644
0 FURTHER/train/FURTHER_00689
0 FURTHER/train/FURTHER_00726
0 FURTHER/train/FURTHER_00759
0 FURTHER/train/FURTHER_00761
0 FURTHER/train/FURTHER_00766
0 FURTHER/train/FURTHER_00798
0 FURTHER/train/FURTHER_00809
0 FURTHER/train/FURTHER_00907
0 FURTHER/train/FURTHER_00918
0 FURTHER/train/FURTHER_00955
0 FURTHER/val/FURTHER_00022
0 FURTHER/val/FURTHER_00025
0 FUTURE/test/FUTURE_00001
0 FUTURE/test/FUTURE_00022
0 FUTURE/test/FUTURE_00028
0 FUTURE/test/FUTURE_00031
0 FUTURE/train/FUTURE_00010
0 FUTURE/train/FUTURE_00045
0 FUTURE/train/FUTURE_00063
0 FUTURE/train/FUTURE_00064
0 FUTURE/train/FUTURE_00088
0 FUTURE/train/FUTURE_00093
0 FUTURE/train/FUTURE_00151
0 FUTURE/train/FUTURE_00165
0 FUTURE/train/FUTURE_00178
0 FUTURE/train/FUTURE_00208
0 FUTURE/train/FUTURE_00213
0 FUTURE/train/FUTURE_00242
0 FUTURE/train/FUTURE_00277
0 FUTURE/train/FUTURE_00288
0 FUTURE/train/FUTURE_00308
0 FUTURE/train/FUTURE_00337
0 FUTURE/train/FUTURE_00345
0 FUTURE/train/FUTURE_00347
0 FUTURE/train/FUTURE_00358
0 FUTURE/train/FUTURE_00405
0 FUTURE/train/FUTURE_00470
0 FUTURE/train/FUTURE_00494
0 FUTURE/train/FUTURE_00525
0 FUTURE/train/FUTURE_00580
0 FUTURE/train/FUTURE_00593
0 FUTURE/train/FUTURE_00595
0 FUTURE/train/FUTURE_00625
0 FUTURE/train/FUTURE_00673
0 FUTURE/train/FUTURE_00712
0 FUTURE/train/FUTURE_00735
0 FUTURE/train/FUTURE_00782
0 FUTURE/train/FUTURE_00858
0 FUTURE/train/FUTURE_00869
0 FUTURE/train/FUTURE_00900
0 FUTURE/train/FUTURE_00916
0 FUTURE/train/FUTURE_00959
0 FUTURE/train/FUTURE_00964
0 FUTURE/train/FUTURE_00967
0 FUTURE/train/FUTURE_00985
0 FUTURE/train/FUTURE_00991
0 FUTURE/train/FUTURE_00997
0 FUTURE/val/FUTURE_00013
0 FUTURE/val/FUTURE_00021
0 FUTURE/val/FUTURE_00035
0 FUTURE/val/FUTURE_00042
0 GAMES/test/GAMES_00042
0 GAMES/train/GAMES_00013
0 GAMES/train/GAMES_00037
0 GAMES/train/GAMES_00043
0 GAMES/train/GAMES_00051
0 GAMES/train/GAMES_00078
0 GAMES/train/GAMES_00144
0 GAMES/train/GAMES_00158
0 GAMES/train/GAMES_00159
0 GAMES/train/GAMES_00197
0 GAMES/train/GAMES_00219
0 GAMES/train/GAMES_00229
0 GAMES/train/GAMES_00234
0 GAMES/train/GAMES_00271
0 GAMES/train/GAMES_00282
0 GAMES/train/GAMES_00311
0 GAMES/train/GAMES_00324
0 GAMES/train/GAMES_00328
0 GAMES/train/GAMES_00333
0 GAMES/train/GAMES_00344
0 GAMES/train/GAMES_00348
0 GAMES/train/GAMES_00362
0 GAMES/train/GAMES_00391
0 GAMES/train/GAMES_00425
0 GAMES/train/GAMES_00451
0 GAMES/train/GAMES_00454
0 GAMES/train/GAMES_00460
0 GAMES/train/GAMES_00478
0 GAMES/train/GAMES_00497
0 GAMES/train/GAMES_00500
0 GAMES/train/GAMES_00505
0 GAMES/train/GAMES_00516
0 GAMES/train/GAMES_00537
0 GAMES/train/GAMES_00538
0 GAMES/train/GAMES_00562
0 GAMES/train/GAMES_00632
0 GAMES/train/GAMES_00638
0 GAMES/train/GAMES_00666
0 GAMES/train/GAMES_00675
0 GAMES/train/GAMES_00711
0 GAMES/train/GAMES_00724
0 GAMES/train/GAMES_00734
0 GAMES/train/GAMES_00774
0 GAMES/train/GAMES_00775
0 GAMES/train/GAMES_00832
0 GAMES/train/GAMES_00840
0 GAMES/train/GAMES_00848
0 GAMES/train/GAMES_00918
0 GAMES/train/GAMES_00925
0 GAMES/train/GAMES_00926
0 GAMES/train/GAMES_00930
0 GENERAL/test/GENERAL_00032
0 GENERAL/train/GENERAL_00022
0 GENERAL/train/GENERAL_00031
0 GENERAL/train/GENERAL_00046
0 GENERAL/train/GENERAL_00068
0 GENERAL/train/GENERAL_00107
0 GENERAL/train/GENERAL_00145
0 GENERAL/train/GENERAL_00165
0 GENERAL/train/GENERAL_00175
0 GENERAL/train/GENERAL_00205
0 GENERAL/train/GENERAL_00253
0 GENERAL/train/GENERAL_00255
0 GENERAL/train/GENERAL_00324
0 GENERAL/train/GENERAL_00331
0 GENERAL/train/GENERAL_00380
0 GENERAL/train/GENERAL_00422
0 GENERAL/train/GENERAL_00436
0 GENERAL/train/GENERAL_00459
0 GENERAL/train/GENERAL_00473
0 GENERAL/train/GENERAL_00488
0 GENERAL/train/GENERAL_00506
0 GENERAL/train/GENERAL_00615
0 GENERAL/train/GENERAL_00620
0 GENERAL/train/GENERAL_00643
0 GENERAL/train/GENERAL_00682
0 GENERAL/train/GENERAL_00703
0 GENERAL/train/GENERAL_00714
0 GENERAL/train/GENERAL_00732
0 GENERAL/train/GENERAL_00796
0 GENERAL/train/GENERAL_00860
0 GENERAL/train/GENERAL_00987
0 GENERAL/train/GENERAL_00998
0 GENERAL/val/GENERAL_00045
0 GEORGE/train/GEORGE_00016
0 GEORGE/train/GEORGE_00024
0 GEORGE/train/GEORGE_00028
0 GEORGE/train/GEORGE_00029
0 GEORGE/train/GEORGE_00072
0 GEORGE/train/GEORGE_00122
0 GEORGE/train/GEORGE_00133
0 GEORGE/train/GEORGE_00152
0 GEORGE/train/GEORGE_00161
0 GEORGE/train/GEORGE_00197
0 GEORGE/train/GEORGE_00216
0 GEORGE/train/GEORGE_00236
0 GEORGE/train/GEORGE_00247
0 GEORGE/train/GEORGE_00256
0 GEORGE/train/GEORGE_00310
0 GEORGE/train/GEORGE_00368
0 GEORGE/train/GEORGE_00423
0 GEORGE/train/GEORGE_00465
0 GEORGE/train/GEORGE_00518
0 GEORGE/train/GEORGE_00549
0 GEORGE/train/GEORGE_00553
0 GEORGE/train/GEORGE_00581
0 GEORGE/train/GEORGE_00584
0 GEORGE/train/GEORGE_00598
0 GEORGE/train/GEORGE_00603
0 GEORGE/train/GEORGE_00607
0 GEORGE/train/GEORGE_00643
0 GEORGE/train/GEORGE_00704
0 GEORGE/train/GEORGE_00706
0 GEORGE/train/GEORGE_00707
0 GEORGE/train/GEORGE_00745
0 GEORGE/train/GEORGE_00838
0 GEORGE/train/GEORGE_00854
0 GEORGE/train/GEORGE_00863
0 GEORGE/train/GEORGE_00889
0 GEORGE/train/GEORGE_00898
0 GEORGE/train/GEORGE_00960
0 GEORGE/train/GEORGE_00995
0 GEORGE/train/GEORGE_00998
0 GEORGE/val/GEORGE_00033
0 GEORGE/val/GEORGE_00035
0 GERMANY/test/GERMANY_00003
0 GERMANY/test/GERMANY_00007
0 GERMANY/test/GERMANY_00008
0 GERMANY/test/GERMANY_00037
0 GERMANY/train/GERMANY_00004
0 GERMANY/train/GERMANY_00013
0 GERMANY/train/GERMANY_00033
0 GERMANY/train/GERMANY_00098
0 GERMANY/train/GERMANY_00120
0 GERMANY/train/GERMANY_00124
0 GERMANY/train/GERMANY_00165
0 GERMANY/train/GERMANY_00168
0 GERMANY/train/GERMANY_00189
0 GERMANY/train/GERMANY_00200
0 GERMANY/train/GERMANY_00268
0 GERMANY/train/GERMANY_00323
0 GERMANY/train/GERMANY_00326
0 GERMANY/train/GERMANY_00334
0 GERMANY/train/GERMANY_00366
0 GERMANY/train/GERMANY_00367
0 GERMANY/train/GERMANY_00430
0 GERMANY/train/GERMANY_00455
0 GERMANY/train/GERMANY_00478
0 GERMANY/train/GERMANY_00490
0 GERMANY/train/GERMANY_00495
0 GERMANY/train/GERMANY_00496
0 GERMANY/train/GERMANY_00508
0 GERMANY/train/GERMANY_00523
0 GERMANY/train/GERMANY_00549
0 GERMANY/train/GERMANY_00560
0 GERMANY/train/GERMANY_00600
0 GERMANY/train/GERMANY_00630
0 GERMANY/train/GERMANY_00662
0 GERMANY/train/GERMANY_00701
0 GERMANY/train/GERMANY_00724
0 GERMANY/train/GERMANY_00741
0 GERMANY/train/GERMANY_00843
0 GERMANY/train/GERMANY_00882
0 GERMANY/train/GERMANY_00932
0 GERMANY/train/GERMANY_00938
0 GERMANY/train/GERMANY_00962
0 GERMANY/val/GERMANY_00002
0 GERMANY/val/GERMANY_00016
0 GERMANY/val/GERMANY_00038
0 GETTING/test/GETTING_00033
0 GETTING/train/GETTING_00150
0 GETTING/train/GETTING_00547
0 GETTING/train/GETTING_00622
0 GETTING/train/GETTING_00627
0 GETTING/train/GETTING_00733
0 GIVEN/test/GIVEN_00008
0 GIVEN/test/GIVEN_00012
0 GIVEN/test/GIVEN_00050
0 GIVEN/train/GIVEN_00042
0 GIVEN/train/GIVEN_00048
0 GIVEN/train/GIVEN_00119
0 GIVEN/train/GIVEN_00147
0 GIVEN/train/GIVEN_00164
0 GIVEN/train/GIVEN_00193
0 GIVEN/train/GIVEN_00196
0 GIVEN/train/GIVEN_00203
0 GIVEN/train/GIVEN_00243
0 GIVEN/train/GIVEN_00251
0 GIVEN/train/GIVEN_00277
0 GIVEN/train/GIVEN_00290
0 GIVEN/train/GIVEN_00302
0 GIVEN/train/GIVEN_00429
0 GIVEN/train/GIVEN_00458
0 GIVEN/train/GIVEN_00510
0 GIVEN/train/GIVEN_00527
0 GIVEN/train/GIVEN_00670
0 GIVEN/train/GIVEN_00694
0 GIVEN/train/GIVEN_00716
0 GIVEN/train/GIVEN_00721
0 GIVEN/train/GIVEN_00766
0 GIVEN/train/GIVEN_00771
0 GIVEN/train/GIVEN_00816
0 GIVEN/train/GIVEN_00836
0 GIVEN/train/GIVEN_00881
0 GIVEN/train/GIVEN_00897
0 GIVEN/train/GIVEN_00906
0 GIVEN/train/GIVEN_00959
0 GIVEN/train/GIVEN_00979
0 GIVEN/train/GIVEN_00999
0 GIVEN/val/GIVEN_00013
0 GIVEN/val/GIVEN_00040
0 GIVING/test/GIVING_00020
0 GIVING/test/GIVING_00033
0 GIVING/test/GIVING_00045
0 GIVING/train/GIVING_00065
0 GIVING/train/GIVING_00075
0 GIVING/train/GIVING_00126
0 GIVING/train/GIVING_00147
0 GIVING/train/GIVING_00165
0 GIVING/train/GIVING_00220
0 GIVING/train/GIVING_00234
0 GIVING/train/GIVING_00282
0 GIVING/train/GIVING_00344
0 GIVING/train/GIVING_00345
0 GIVING/train/GIVING_00354
0 GIVING/train/GIVING_00357
0 GIVING/train/GIVING_00418
0 GIVING/train/GIVING_00433
0 GIVING/train/GIVING_00459
0 GIVING/train/GIVING_00481
0 GIVING/train/GIVING_00489
0 GIVING/train/GIVING_00516
0 GIVING/train/GIVING_00534
0 GIVING/train/GIVING_00535
0 GIVING/train/GIVING_00536
0 GIVING/train/GIVING_00552
0 GIVING/train/GIVING_00622
0 GIVING/train/GIVING_00629
0 GIVING/train/GIVING_00641
0 GIVING/train/GIVING_00648
0 GIVING/train/GIVING_00657
0 GIVING/train/GIVING_00680
0 GIVING/train/GIVING_00691
0 GIVING/train/GIVING_00718
0 GIVING/train/GIVING_00736
0 GIVING/train/GIVING_00751
0 GIVING/train/GIVING_00770
0 GIVING/train/GIVING_00789
0 GIVING/train/GIVING_00792
0 GIVING/train/GIVING_00810
0 GIVING/train/GIVING_00849
0 GIVING/train/GIVING_00856
0 GIVING/train/GIVING_00901
0 GIVING/train/GIVING_00947
0 GIVING/train/GIVING_00985
0 GIVING/val/GIVING_00033
0 GLOBAL/test/GLOBAL_00023
0 GLOBAL/test/GLOBAL_00034
0 GLOBAL/test/GLOBAL_00042
0 GLOBAL/test/GLOBAL_00043
0 GLOBAL/test/GLOBAL_00046
0 GLOBAL/train/GLOBAL_00010
0 GLOBAL/train/GLOBAL_00040
0 GLOBAL/train/GLOBAL_00075
0 GLOBAL/train/GLOBAL_00082
0 GLOBAL/train/GLOBAL_00086
0 GLOBAL/train/GLOBAL_00101
0 GLOBAL/train/GLOBAL_00113
0 GLOBAL/train/GLOBAL_00118
0 GLOBAL/train/GLOBAL_00141
0 GLOBAL/train/GLOBAL_00179
0 GLOBAL/train/GLOBAL_00196
0 GLOBAL/train/GLOBAL_00214
0 GLOBAL/train/GLOBAL_00217
0 GLOBAL/train/GLOBAL_00239
0 GLOBAL/train/GLOBAL_00253
0 GLOBAL/train/GLOBAL_00293
0 GLOBAL/train/GLOBAL_00344
0 GLOBAL/train/GLOBAL_00349
0 GLOBAL/train/GLOBAL_00360
0 GLOBAL/train/GLOBAL_00432
0 GLOBAL/train/GLOBAL_00449
0 GLOBAL/train/GLOBAL_00457
0 GLOBAL/train/GLOBAL_00462
0 GLOBAL/train/GLOBAL_00478
0 GLOBAL/train/GLOBAL_00503
0 GLOBAL/train/GLOBAL_00510
0 GLOBAL/train/GLOBAL_00522
0 GLOBAL/train/GLOBAL_00550
0 GLOBAL/train/GLOBAL_00556
0 GLOBAL/train/GLOBAL_00560
0 GLOBAL/train/GLOBAL_00608
0 GLOBAL/train/GLOBAL_00672
0 GLOBAL/train/GLOBAL_00675
0 GLOBAL/train/GLOBAL_00701
0 GLOBAL/train/GLOBAL_00713
0 GLOBAL/train/GLOBAL_00735
0 GLOBAL/train/GLOBAL_00743
0 GLOBAL/train/GLOBAL_00792
0 GLOBAL/train/GLOBAL_00794
0 GLOBAL/train/GLOBAL_00799
0 GLOBAL/train/GLOBAL_00810
0 GLOBAL/train/GLOBAL_00824
0 GLOBAL/train/GLOBAL_00851
0 GLOBAL/train/GLOBAL_00862
0 GLOBAL/train/GLOBAL_00866
0 GLOBAL/train/GLOBAL_00883
0 GLOBAL/train/GLOBAL_00886
0 GLOBAL/train/GLOBAL_00896
0 GLOBAL/train/GLOBAL_00908
0 GLOBAL/train/GLOBAL_00916
0 GLOBAL/train/GLOBAL_00934
0 GLOBAL/val/GLOBAL_00018
0 GLOBAL/val/GLOBAL_00022
0 GLOBAL/val/GLOBAL_00050
0 GOING/train/GOING_00289
0 GOING/train/GOING_00307
0 GOING/train/GOING_00313
0 GOING/train/GOING_00319
0 GOING/train/GOING_00338
0 GOING/train/GOING_00339
0 GOVERNMENT/test/GOVERNMENT_00016
0 GOVERNMENT/test/GOVERNMENT_00032
0 GOVERNMENT/test/GOVERNMENT_00041
0 GOVERNMENT/train/GOVERNMENT_00020
0 GOVERNMENT/train/GOVERNMENT_00106
0 GOVERNMENT/train/GOVERNMENT_00116
0 GOVERNMENT/train/GOVERNMENT_00164
0 GOVERNMENT/train/GOVERNMENT_00210
0 GOVERNMENT/train/GOVERNMENT_00216
0 GOVERNMENT/train/GOVERNMENT_00274
0 GOVERNMENT/train/GOVERNMENT_00290
0 GOVERNMENT/train/GOVERNMENT_00300
0 GOVERNMENT/train/GOVERNMENT_00350
0 GOVERNMENT/train/GOVERNMENT_00355
0 GOVERNMENT/train/GOVERNMENT_00484
0 GOVERNMENT/train/GOVERNMENT_00517
0 GOVERNMENT/train/GOVERNMENT_00526
0 GOVERNMENT/train/GOVERNMENT_00541
0 GOVERNMENT/train/GOVERNMENT_00551
0 GOVERNMENT/train/GOVERNMENT_00602
0 GOVERNMENT/train/GOVERNMENT_00655
0 GOVERNMENT/train/GOVERNMENT_00668
0 GOVERNMENT/train/GOVERNMENT_00681
0 GOVERNMENT/train/GOVERNMENT_00706
0 GOVERNMENT/train/GOVERNMENT_00710
0 GOVERNMENT/train/GOVERNMENT_00711
0 GOVERNMENT/train/GOVERNMENT_00732
0 GOVERNMENT/train/GOVERNMENT_00750
0 GOVERNMENT/train/GOVERNMENT_00764
0 GOVERNMENT/train/GOVERNMENT_00770
0 GOVERNMENT/train/GOVERNMENT_00789
0 GOVERNMENT/train/GOVERNMENT_00809
0 GOVERNMENT/train/GOVERNMENT_00841
0 GOVERNMENT/train/GOVERNMENT_00850
0 GOVERNMENT/train/GOVERNMENT_00880
0 GOVERNMENT/train/GOVERNMENT_00931
0 GOVERNMENT/train/GOVERNMENT_00932
0 GOVERNMENT/train/GOVERNMENT_00940
0 GOVERNMENT/train/GOVERNMENT_00957
0 GOVERNMENT/train/GOVERNMENT_00978
0 GOVERNMENT/val/GOVERNMENT_00010
0 GOVERNMENT/val/GOVERNMENT_00029
0 GREAT/train/GREAT_00105
0 GREAT/train/GREAT_00177
0 GREAT/train/GREAT_00187
0 GREAT/train/GREAT_00192
0 GREAT/train/GREAT_00374
0 GREAT/train/GREAT_00388
0 GREAT/train/GREAT_00666
0 GREAT/train/GREAT_00673
0 GREAT/train/GREAT_00697
0 GREAT/train/GREAT_00728
0 GREAT/train/GREAT_00938
0 GREAT/train/GREAT_00986
0 GREECE/test/GREECE_00017
0 GREECE/test/GREECE_00023
0 GREECE/test/GREECE_00030
0 GREECE/test/GREECE_00036
0 GREECE/test/GREECE_00038
0 GREECE/test/GREECE_00046
0 GREECE/train/GREECE_00002
0 GREECE/train/GREECE_00011
0 GREECE/train/GREECE_00060
0 GREECE/train/GREECE_00070
0 GREECE/train/GREECE_00139
0 GREECE/train/GREECE_00150
0 GREECE/train/GREECE_00154
0 GREECE/train/GREECE_00175
0 GREECE/train/GREECE_00181
0 GREECE/train/GREECE_00216
0 GREECE/train/GREECE_00245
0 GREECE/train/GREECE_00273
0 GREECE/train/GREECE_00518
0 GREECE/train/GREECE_00599
0 GREECE/train/GREECE_00661
0 GREECE/train/GREECE_00667
0 GREECE/train/GREECE_00668
0 GREECE/train/GREECE_00694
0 GREECE/train/GREECE_00823
0 GREECE/train/GREECE_00871
0 GREECE/train/GREECE_00915
0 GREECE/train/GREECE_00917
0 GREECE/train/GREECE_00937
0 GREECE/train/GREECE_00947
0 GROUND/train/GROUND_00067
0 GROUND/train/GROUND_00082
0 GROUND/train/GROUND_00135
0 GROUND/train/GROUND_00193
0 GROUND/train/GROUND_00194
0 GROUND/train/GROUND_00281
0 GROUND/train/GROUND_00329
0 GROUND/train/GROUND_00369
0 GROUND/train/GROUND_00399
0 GROUND/train/GROUND_00435
0 GROUND/train/GROUND_00688
0 GROUND/train/GROUND_00790
0 GROUND/train/GROUND_00839
0 GROUND/train/GROUND_00851
0 GROUND/train/GROUND_00913
0 GROUND/train/GROUND_00982
0 GROUND/train/GROUND_00996
0 GROUND/val/GROUND_00040
0 GROUP/test/GROUP_00016
0 GROUP/test/GROUP_00017
0 GROUP/test/GROUP_00040
0 GROUP/train/GROUP_00002
0 GROUP/train/GROUP_00023
0 GROUP/train/GROUP_00026
0 GROUP/train/GROUP_00034
0 GROUP/train/GROUP_00042
0 GROUP/train/GROUP_00046
0 GROUP/train/GROUP_00047
0 GROUP/train/GROUP_00087
0 GROUP/train/GROUP_00161
0 GROUP/train/GROUP_00168
0 GROUP/train/GROUP_00171
0 GROUP/train/GROUP_00196
0 GROUP/train/GROUP_00207
0 GROUP/train/GROUP_00218
0 GROUP/train/GROUP_00243
0 GROUP/train/GROUP_00247
0 GROUP/train/GROUP_00262
0 GROUP/train/GROUP_00276
0 GROUP/train/GROUP_00282
0 GROUP/train/GROUP_00347
0 GROUP/train/GROUP_00356
0 GROUP/train/GROUP_00359
0 GROUP/train/GROUP_00388
0 GROUP/train/GROUP_00389
0 GROUP/train/GROUP_00432
0 GROUP/train/GROUP_00456
0 GROUP/train/GROUP_00478
0 GROUP/train/GROUP_00497
0 GROUP/train/GROUP_00503
0 GROUP/train/GROUP_00505
0 GROUP/train/GROUP_00522
0 GROUP/train/GROUP_00525
0 GROUP/train/GROUP_00546
0 GROUP/train/GROUP_00568
0 GROUP/train/GROUP_00589
0 GROUP/train/GROUP_00619
0 GROUP/train/GROUP_00629
0 GROUP/train/GROUP_00645
0 GROUP/train/GROUP_00655
0 GROUP/train/GROUP_00692
0 GROUP/train/GROUP_00695
0 GROUP/train/GROUP_00734
0 GROUP/train/GROUP_00762
0 GROUP/train/GROUP_00770
0 GROUP/train/GROUP_00815
0 GROUP/train/GROUP_00896
0 GROUP/train/GROUP_00929
0 GROUP/train/GROUP_00952
0 GROUP/train/GROUP_00956
0 GROUP/train/GROUP_00974
0 GROUP/train/GROUP_00989
0 GROUP/train/GROUP_00999
0 GROUP/val/GROUP_00010
0 GROUP/val/GROUP_00032
0 GROUP/val/GROUP_00049
0 GROWING/test/GROWING_00014
0 GROWING/test/GROWING_00021
0 GROWING/test/GROWING_00034
0 GROWING/test/GROWING_00035
0 GROWING/test/GROWING_00036
0 GROWING/test/GROWING_00045
0 GROWING/train/GROWING_00005
0 GROWING/train/GROWING_00016
0 GROWING/train/GROWING_00031
0 GROWING/train/GROWING_00064
0 GROWING/train/GROWING_00070
0 GROWING/train/GROWING_00079
0 GROWING/train/GROWING_00082
0 GROWING/train/GROWING_00097
0 GROWING/train/GROWING_00116
0 GROWING/train/GROWING_00125
0 GROWING/train/GROWING_00193
0 GROWING/train/GROWING_00203
0 GROWING/train/GROWING_00220
0 GROWING/train/GROWING_00258
0 GROWING/train/GROWING_00273
0 GROWING/train/GROWING_00275
0 GROWING/train/GROWING_00281
0 GROWING/train/GROWING_00297
0 GROWING/train/GROWING_00298
0 GROWING/train/GROWING_00303
0 GROWING/train/GROWING_00330
0 GROWING/train/GROWING_00390
0 GROWING/train/GROWING_00407
0 GROWING/train/GROWING_00408
0 GROWING/train/GROWING_00409
0 GROWING/train/GROWING_00427
0 GROWING/train/GROWING_00437
0 GROWING/train/GROWING_00439
0 GROWING/train/GROWING_00465
0 GROWING/train/GROWING_00466
0 GROWING/train/GROWING_00474
0 GROWING/train/GROWING_00482
0 GROWING/train/GROWING_00486
0 GROWING/train/GROWING_00491
0 GROWING/train/GROWING_00506
0 GROWING/train/GROWING_00513
0 GROWING/train/GROWING_00515
0 GROWING/train/GROWING_00525
0 GROWING/train/GROWING_00531
0 GROWING/train/GROWING_00538
0 GROWING/train/GROWING_00562
0 GROWING/train/GROWING_00577
0 GROWING/train/GROWING_00614
0 GROWING/train/GROWING_00621
0 GROWING/train/GROWING_00622
0 GROWING/train/GROWING_00624
0 GROWING/train/GROWING_00645
0 GROWING/train/GROWING_00690
0 GROWING/train/GROWING_00706
0 GROWING/train/GROWING_00801
0 GROWING/train/GROWING_00833
0 GROWING/train/GROWING_00845
0 GROWING/train/GROWING_00866
0 GROWING/train/GROWING_00929
0 GROWING/train/GROWING_00953
0 GROWING/train/GROWING_00955
0 GROWING/val/GROWING_00009
0 GROWTH/test/GROWTH_00034
0 GROWTH/test/GROWTH_00041
0 GROWTH/train/GROWTH_00076
0 GROWTH/train/GROWTH_00078
0 GROWTH/train/GROWTH_00084
0 GROWTH/train/GROWTH_00089
0 GROWTH/train/GROWTH_00122
0 GROWTH/train/GROWTH_00157
0 GROWTH/train/GROWTH_00160
0 GROWTH/train/GROWTH_00165
0 GROWTH/train/GROWTH_00203
0 GROWTH/train/GROWTH_00212
0 GROWTH/train/GROWTH_00222
0 GROWTH/train/GROWTH_00226
0 GROWTH/train/GROWTH_00228
0 GROWTH/train/GROWTH_00236
0 GROWTH/train/GROWTH_00245
0 GROWTH/train/GROWTH_00249
0 GROWTH/train/GROWTH_00255
0 GROWTH/train/GROWTH_00297
0 GROWTH/train/GROWTH_00315
0 GROWTH/train/GROWTH_00317
0 GROWTH/train/GROWTH_00331
0 GROWTH/train/GROWTH_00362
0 GROWTH/train/GROWTH_00398
0 GROWTH/train/GROWTH_00428
0 GROWTH/train/GROWTH_00469
0 GROWTH/train/GROWTH_00481
0 GROWTH/train/GROWTH_00517
0 GROWTH/train/GROWTH_00522
0 GROWTH/train/GROWTH_00552
0 GROWTH/train/GROWTH_00557
0 GROWTH/train/GROWTH_00577
0 GROWTH/train/GROWTH_00606
0 GROWTH/train/GROWTH_00620
0 GROWTH/train/GROWTH_00623
0 GROWTH/train/GROWTH_00749
0 GROWTH/train/GROWTH_00767
0 GROWTH/train/GROWTH_00797
0 GROWTH/train/GROWTH_00826
0 GROWTH/train/GROWTH_00828
0 GROWTH/train/GROWTH_00839
0 GROWTH/train/GROWTH_00841
0 GROWTH/train/GROWTH_00857
0 GROWTH/train/GROWTH_00873
0 GROWTH/train/GROWTH_00920
0 GROWTH/val/GROWTH_00019
0 GROWTH/val/GROWTH_00023
0 GROWTH/val/GROWTH_00030
0 GROWTH/val/GROWTH_00041
0 GROWTH/val/GROWTH_00047
0 GUILTY/test/GUILTY_00016
0 GUILTY/test/GUILTY_00028
0 GUILTY/test/GUILTY_00042
0 GUILTY/train/GUILTY_00029
0 GUILTY/train/GUILTY_00033
0 GUILTY/train/GUILTY_00043
0 GUILTY/train/GUILTY_00049
0 GUILTY/train/GUILTY_00055
0 GUILTY/train/GUILTY_00059
0 GUILTY/train/GUILTY_00070
0 GUILTY/train/GUILTY_00071
0 GUILTY/train/GUILTY_00091
0 GUILTY/train/GUILTY_00110
0 GUILTY/train/GUILTY_00149
0 GUILTY/train/GUILTY_00174
0 GUILTY/train/GUILTY_00188
0 GUILTY/train/GUILTY_00201
0 GUILTY/train/GUILTY_00208
0 GUILTY/train/GUILTY_00230
0 GUILTY/train/GUILTY_00245
0 GUILTY/train/GUILTY_00255
0 GUILTY/train/GUILTY_00258
0 GUILTY/train/GUILTY_00292
0 GUILTY/train/GUILTY_00295
0 GUILTY/train/GUILTY_00296
0 GUILTY/train/GUILTY_00307
0 GUILTY/train/GUILTY_00351
0 GUILTY/train/GUILTY_00353
0 GUILTY/train/GUILTY_00355
0 GUILTY/train/GUILTY_00359
0 GUILTY/train/GUILTY_00389
0 GUILTY/train/GUILTY_00390
0 GUILTY/train/GUILTY_00398
0 GUILTY/train/GUILTY_00414
0 GUILTY/train/GUILTY_00449
0 GUILTY/train/GUILTY_00461
0 GUILTY/train/GUILTY_00486
0 GUILTY/train/GUILTY_00488
0 GUILTY/train/GUILTY_00500
0 GUILTY/train/GUILTY_00512
0 GUILTY/train/GUILTY_00520
0 GUILTY/train/GUILTY_00532
0 GUILTY/train/GUILTY_00544
0 GUILTY/train/GUILTY_00554
0 GUILTY/train/GUILTY_00555
0 GUILTY/train/GUILTY_00562
0 GUILTY/train/GUILTY_00587
0 GUILTY/train/GUILTY_00600
0 GUILTY/train/GUILTY_00604
0 GUILTY/train/GUILTY_00640
0 GUILTY/train/GUILTY_00660
0 GUILTY/train/GUILTY_00669
0 GUILTY/train/GUILTY_00692
0 GUILTY/train/GUILTY_00693
0 GUILTY/train/GUILTY_00730
0 GUILTY/train/GUILTY_00737
0 GUILTY/train/GUILTY_00738
0 GUILTY/train/GUILTY_00744
0 GUILTY/train/GUILTY_00747
0 GUILTY/train/GUILTY_00769
0 GUILTY/train/GUILTY_00798
0 GUILTY/train/GUILTY_00821
0 GUILTY/train/GUILTY_00824
0 GUILTY/train/GUILTY_00826
0 GUILTY/train/GUILTY_00829
0 GUILTY/train/GUILTY_00847
0 GUILTY/val/GUILTY_00005
0 GUILTY/val/GUILTY_00023
0 GUILTY/val/GUILTY_00031
0 GUILTY/val/GUILTY_00035
0 GUILTY/val/GUILTY_00047
0 HAPPENED/test/HAPPENED_00015
0 HAPPENED/train/HAPPENED_00103
0 HAPPENED/train/HAPPENED_00124
0 HAPPENED/train/HAPPENED_00125
0 HAPPENED/train/HAPPENED_00263
0 HAPPENED/train/HAPPENED_00307
0 HAPPENED/train/HAPPENED_00329
0 HAPPENED/train/HAPPENED_00349
0 HAPPENED/train/HAPPENED_00379
0 HAPPENED/train/HAPPENED_00412
0 HAPPENED/train/HAPPENED_00441
0 HAPPENED/train/HAPPENED_00530
0 HAPPENED/train/HAPPENED_00619
0 HAPPENED/train/HAPPENED_00748
0 HAPPENED/train/HAPPENED_00784
0 HAPPENED/train/HAPPENED_00826
0 HAPPENED/train/HAPPENED_00840
0 HAPPENED/train/HAPPENED_00856
0 HAPPENED/train/HAPPENED_00938
0 HAPPENED/train/HAPPENED_00951
0 HAPPENED/val/HAPPENED_00013
0 HAPPENING/train/HAPPENING_00271
0 HAPPENING/train/HAPPENING_00545
0 HAPPENING/train/HAPPENING_00848
0 HAPPENING/val/HAPPENING_00049
0 HAPPEN/train/HAPPEN_00169
0 HAPPEN/train/HAPPEN_00265
0 HAPPEN/train/HAPPEN_00734
0 HAPPEN/train/HAPPEN_00859
0 HAPPEN/train/HAPPEN_00934
0 HAVING/train/HAVING_00011
0 HAVING/train/HAVING_00104
0 HAVING/train/HAVING_00146
0 HAVING/train/HAVING_00200
0 HAVING/train/HAVING_00216
0 HAVING/train/HAVING_00218
0 HAVING/train/HAVING_00262
0 HAVING/train/HAVING_00277
0 HAVING/train/HAVING_00315
0 HAVING/train/HAVING_00388
0 HAVING/train/HAVING_00505
0 HAVING/train/HAVING_00528
0 HAVING/train/HAVING_00551
0 HAVING/train/HAVING_00622
0 HAVING/train/HAVING_00628
0 HAVING/train/HAVING_00629
0 HAVING/train/HAVING_00714
0 HAVING/train/HAVING_00718
0 HAVING/train/HAVING_00861
0 HAVING/train/HAVING_00896
0 HEALTH/test/HEALTH_00001
0 HEALTH/test/HEALTH_00020
0 HEALTH/train/HEALTH_00038
0 HEALTH/train/HEALTH_00046
0 HEALTH/train/HEALTH_00147
0 HEALTH/train/HEALTH_00166
0 HEALTH/train/HEALTH_00183
0 HEALTH/train/HEALTH_00196
0 HEALTH/train/HEALTH_00209
0 HEALTH/train/HEALTH_00223
0 HEALTH/train/HEALTH_00233
0 HEALTH/train/HEALTH_00274
0 HEALTH/train/HEALTH_00285
0 HEALTH/train/HEALTH_00289
0 HEALTH/train/HEALTH_00309
0 HEALTH/train/HEALTH_00335
0 HEALTH/train/HEALTH_00407
0 HEALTH/train/HEALTH_00447
0 HEALTH/train/HEALTH_00476
0 HEALTH/train/HEALTH_00485
0 HEALTH/train/HEALTH_00487
0 HEALTH/train/HEALTH_00514
0 HEALTH/train/HEALTH_00591
0 HEALTH/train/HEALTH_00608
0 HEALTH/train/HEALTH_00682
0 HEALTH/train/HEALTH_00683
0 HEALTH/train/HEALTH_00685
0 HEALTH/train/HEALTH_00726
0 HEALTH/train/HEALTH_00733
0 HEALTH/train/HEALTH_00736
0 HEALTH/train/HEALTH_00761
0 HEALTH/train/HEALTH_00776
0 HEALTH/train/HEALTH_00780
0 HEALTH/train/HEALTH_00803
0 HEALTH/train/HEALTH_00812
0 HEALTH/train/HEALTH_00823
0 HEALTH/train/HEALTH_00829
0 HEALTH/train/HEALTH_00851
0 HEALTH/train/HEALTH_00861
0 HEALTH/train/HEALTH_00866
0 HEALTH/train/HEALTH_00875
0 HEALTH/val/HEALTH_00031
0 HEARD/test/HEARD_00013
0 HEARD/test/HEARD_00044
0 HEARD/train/HEARD_00024
0 HEARD/train/HEARD_00052
0 HEARD/train/HEARD_00076
0 HEARD/train/HEARD_00117
0 HEARD/train/HEARD_00179
0 HEARD/train/HEARD_00184
0 HEARD/train/HEARD_00203
0 HEARD/train/HEARD_00285
0 HEARD/train/HEARD_00405
0 HEARD/train/HEARD_00495
0 HEARD/train/HEARD_00502
0 HEARD/train/HEARD_00510
0 HEARD/train/HEARD_00573
0 HEARD/train/HEARD_00592
0 HEARD/train/HEARD_00608
0 HEARD/train/HEARD_00625
0 HEARD/train/HEARD_00675
0 HEARD/train/HEARD_00802
0 HEARD/train/HEARD_00832
0 HEARD/train/HEARD_00924
0 HEARD/train/HEARD_00931
0 HEARD/train/HEARD_00939
0 HEARD/train/HEARD_00956
0 HEARD/train/HEARD_00990
0 HEARD/train/HEARD_00998
0 HEARD/train/HEARD_01000
0 HEART/test/HEART_00001
0 HEART/test/HEART_00028
0 HEART/test/HEART_00042
0 HEART/train/HEART_00012
0 HEART/train/HEART_00040
0 HEART/train/HEART_00043
0 HEART/train/HEART_00070
0 HEART/train/HEART_00097
0 HEART/train/HEART_00117
0 HEART/train/HEART_00118
0 HEART/train/HEART_00126
0 HEART/train/HEART_00147
0 HEART/train/HEART_00189
0 HEART/train/HEART_00194
0 HEART/train/HEART_00256
0 HEART/train/HEART_00329
0 HEART/train/HEART_00355
0 HEART/train/HEART_00366
0 HEART/train/HEART_00378
0 HEART/train/HEART_00444
0 HEART/train/HEART_00519
0 HEART/train/HEART_00577
0 HEART/train/HEART_00581
0 HEART/train/HEART_00627
0 HEART/train/HEART_00635
0 HEART/train/HEART_00642
0 HEART/train/HEART_00658
0 HEART/train/HEART_00689
0 HEART/train/HEART_00694
0 HEART/train/HEART_00700
0 HEART/train/HEART_00703
0 HEART/train/HEART_00712
0 HEART/train/HEART_00805
0 HEART/train/HEART_00817
0 HEART/train/HEART_00825
0 HEART/train/HEART_00845
0 HEART/train/HEART_00848
0 HEART/train/HEART_00850
0 HEART/train/HEART_00864
0 HEART/train/HEART_00869
0 HEART/val/HEART_00006
0 HEART/val/HEART_00016
0 HEAVY/train/HEAVY_00053
0 HEAVY/train/HEAVY_00215
0 HEAVY/train/HEAVY_00375
0 HEAVY/train/HEAVY_00421
0 HEAVY/train/HEAVY_00527
0 HEAVY/train/HEAVY_00566
0 HEAVY/train/HEAVY_00672
0 HEAVY/train/HEAVY_00682
0 HEAVY/train/HEAVY_00776
0 HEAVY/train/HEAVY_00817
0 HEAVY/train/HEAVY_00859
0 HEAVY/train/HEAVY_00891
0 HEAVY/train/HEAVY_00898
0 HEAVY/train/HEAVY_00954
0 HEAVY/train/HEAVY_00956
0 HEAVY/val/HEAVY_00016
0 HIGHER/test/HIGHER_00048
0 HIGHER/train/HIGHER_00002
0 HIGHER/train/HIGHER_00056
0 HIGHER/train/HIGHER_00070
0 HIGHER/train/HIGHER_00076
0 HIGHER/train/HIGHER_00116
0 HIGHER/train/HIGHER_00137
0 HIGHER/train/HIGHER_00138
0 HIGHER/train/HIGHER_00167
0 HIGHER/train/HIGHER_00168
0 HIGHER/train/HIGHER_00169
0 HIGHER/train/HIGHER_00171
0 HIGHER/train/HIGHER_00187
0 HIGHER/train/HIGHER_00232
0 HIGHER/train/HIGHER_00280
0 HIGHER/train/HIGHER_00296
0 HIGHER/train/HIGHER_00407
0 HIGHER/train/HIGHER_00454
0 HIGHER/train/HIGHER_00466
0 HIGHER/train/HIGHER_00498
0 HIGHER/train/HIGHER_00505
0 HIGHER/train/HIGHER_00508
0 HIGHER/train/HIGHER_00545
0 HIGHER/train/HIGHER_00566
0 HIGHER/train/HIGHER_00573
0 HIGHER/train/HIGHER_00590
0 HIGHER/train/HIGHER_00611
0 HIGHER/train/HIGHER_00652
0 HIGHER/train/HIGHER_00672
0 HIGHER/train/HIGHER_00682
0 HIGHER/train/HIGHER_00720
0 HIGHER/train/HIGHER_00733
0 HIGHER/train/HIGHER_00745
0 HIGHER/train/HIGHER_00751
0 HIGHER/train/HIGHER_00760
0 HIGHER/train/HIGHER_00762
0 HIGHER/train/HIGHER_00782
0 HIGHER/train/HIGHER_00798
0 HIGHER/train/HIGHER_00815
0 HIGHER/train/HIGHER_00820
0 HIGHER/train/HIGHER_00877
0 HIGHER/val/HIGHER_00007
0 HISTORY/test/HISTORY_00002
0 HISTORY/test/HISTORY_00025
0 HISTORY/test/HISTORY_00047
0 HISTORY/train/HISTORY_00014
0 HISTORY/train/HISTORY_00072
0 HISTORY/train/HISTORY_00167
0 HISTORY/train/HISTORY_00239
0 HISTORY/train/HISTORY_00254
0 HISTORY/train/HISTORY_00282
0 HISTORY/train/HISTORY_00378
0 HISTORY/train/HISTORY_00380
0 HISTORY/train/HISTORY_00390
0 HISTORY/train/HISTORY_00391
0 HISTORY/train/HISTORY_00411
0 HISTORY/train/HISTORY_00454
0 HISTORY/train/HISTORY_00472
0 HISTORY/train/HISTORY_00486
0 HISTORY/train/HISTORY_00533
0 HISTORY/train/HISTORY_00546
0 HISTORY/train/HISTORY_00548
0 HISTORY/train/HISTORY_00552
0 HISTORY/train/HISTORY_00592
0 HISTORY/train/HISTORY_00637
0 HISTORY/train/HISTORY_00655
0 HISTORY/train/HISTORY_00658
0 HISTORY/train/HISTORY_00707
0 HISTORY/train/HISTORY_00730
0 HISTORY/train/HISTORY_00731
0 HISTORY/train/HISTORY_00744
0 HISTORY/train/HISTORY_00761
0 HISTORY/train/HISTORY_00780
0 HISTORY/train/HISTORY_00821
0 HISTORY/train/HISTORY_00844
0 HISTORY/train/HISTORY_00870
0 HISTORY/train/HISTORY_00879
0 HISTORY/train/HISTORY_00888
0 HISTORY/train/HISTORY_00890
0 HISTORY/train/HISTORY_00964
0 HISTORY/train/HISTORY_00967
0 HOMES/test/HOMES_00019
0 HOMES/test/HOMES_00040
0 HOMES/test/HOMES_00041
0 HOMES/train/HOMES_00064
0 HOMES/train/HOMES_00133
0 HOMES/train/HOMES_00205
0 HOMES/train/HOMES_00279
0 HOMES/train/HOMES_00329
0 HOMES/train/HOMES_00333
0 HOMES/train/HOMES_00429
0 HOMES/train/HOMES_00458
0 HOMES/train/HOMES_00476
0 HOMES/train/HOMES_00557
0 HOMES/train/HOMES_00570
0 HOMES/train/HOMES_00598
0 HOMES/train/HOMES_00627
0 HOMES/train/HOMES_00642
0 HOMES/train/HOMES_00674
0 HOMES/train/HOMES_00677
0 HOMES/train/HOMES_00686
0 HOMES/train/HOMES_00711
0 HOMES/train/HOMES_00731
0 HOMES/train/HOMES_00816
0 HOMES/train/HOMES_00835
0 HOMES/train/HOMES_00885
0 HOMES/train/HOMES_00911
0 HOMES/train/HOMES_00932
0 HOMES/train/HOMES_00972
0 HOMES/train/HOMES_00986
0 HOMES/val/HOMES_00005
0 HOMES/val/HOMES_00029
0 HOSPITAL/train/HOSPITAL_00011
0 HOSPITAL/train/HOSPITAL_00027
0 HOSPITAL/train/HOSPITAL_00053
0 HOSPITAL/train/HOSPITAL_00093
0 HOSPITAL/train/HOSPITAL_00102
0 HOSPITAL/train/HOSPITAL_00107
0 HOSPITAL/train/HOSPITAL_00161
0 HOSPITAL/train/HOSPITAL_00194
0 HOSPITAL/train/HOSPITAL_00196
0 HOSPITAL/train/HOSPITAL_00201
0 HOSPITAL/train/HOSPITAL_00205
0 HOSPITAL/train/HOSPITAL_00216
0 HOSPITAL/train/HOSPITAL_00226
0 HOSPITAL/train/HOSPITAL_00252
0 HOSPITAL/train/HOSPITAL_00257
0 HOSPITAL/train/HOSPITAL_00312
0 HOSPITAL/train/HOSPITAL_00380
0 HOSPITAL/train/HOSPITAL_00381
0 HOSPITAL/train/HOSPITAL_00419
0 HOSPITAL/train/HOSPITAL_00428
0 HOSPITAL/train/HOSPITAL_00447
0 HOSPITAL/train/HOSPITAL_00455
0 HOSPITAL/train/HOSPITAL_00457
0 HOSPITAL/train/HOSPITAL_00499
0 HOSPITAL/train/HOSPITAL_00521
0 HOSPITAL/train/HOSPITAL_00522
0 HOSPITAL/train/HOSPITAL_00537
0 HOSPITAL/train/HOSPITAL_00545
0 HOSPITAL/train/HOSPITAL_00584
0 HOSPITAL/train/HOSPITAL_00596
0 HOSPITAL/train/HOSPITAL_00606
0 HOSPITAL/train/HOSPITAL_00607
0 HOSPITAL/train/HOSPITAL_00624
0 HOSPITAL/train/HOSPITAL_00642
0 HOSPITAL/train/HOSPITAL_00646
0 HOSPITAL/train/HOSPITAL_00651
0 HOSPITAL/train/HOSPITAL_00708
0 HOSPITAL/train/HOSPITAL_00732
0 HOSPITAL/train/HOSPITAL_00739
0 HOSPITAL/train/HOSPITAL_00761
0 HOSPITAL/train/HOSPITAL_00795
0 HOSPITAL/train/HOSPITAL_00815
0 HOSPITAL/train/HOSPITAL_00829
0 HOSPITAL/train/HOSPITAL_00832
0 HOSPITAL/train/HOSPITAL_00841
0 HOSPITAL/train/HOSPITAL_00887
0 HOSPITAL/train/HOSPITAL_00890
0 HOSPITAL/train/HOSPITAL_00899
0 HOSPITAL/train/HOSPITAL_00902
0 HOSPITAL/train/HOSPITAL_00915
0 HOSPITAL/train/HOSPITAL_00934
0 HOSPITAL/train/HOSPITAL_00956
0 HOSPITAL/train/HOSPITAL_00959
0 HOSPITAL/val/HOSPITAL_00005
0 HOSPITAL/val/HOSPITAL_00013
0 HOSPITAL/val/HOSPITAL_00038
0 HOSPITAL/val/HOSPITAL_00039
0 HOSPITAL/val/HOSPITAL_00040
0 HOSPITAL/val/HOSPITAL_00044
0 HOSPITAL/val/HOSPITAL_00048
0 HOURS/train/HOURS_00041
0 HOURS/train/HOURS_00116
0 HOURS/train/HOURS_00131
0 HOURS/train/HOURS_00137
0 HOURS/train/HOURS_00168
0 HOURS/train/HOURS_00177
0 HOURS/train/HOURS_00202
0 HOURS/train/HOURS_00354
0 HOURS/train/HOURS_00357
0 HOURS/train/HOURS_00368
0 HOURS/train/HOURS_00383
0 HOURS/train/HOURS_00400
0 HOURS/train/HOURS_00433
0 HOURS/train/HOURS_00441
0 HOURS/train/HOURS_00448
0 HOURS/train/HOURS_00458
0 HOURS/train/HOURS_00485
0 HOURS/train/HOURS_00509
0 HOURS/train/HOURS_00611
0 HOURS/train/HOURS_00615
0 HOURS/train/HOURS_00684
0 HOURS/train/HOURS_00686
0 HOURS/train/HOURS_00691
0 HOURS/train/HOURS_00704
0 HOURS/train/HOURS_00731
0 HOURS/train/HOURS_00875
0 HOURS/train/HOURS_00903
0 HOURS/train/HOURS_00912
0 HOURS/train/HOURS_00928
0 HOURS/train/HOURS_00930
0 HOURS/train/HOURS_00934
0 HOURS/train/HOURS_00937
0 HOURS/train/HOURS_00979
0 HOURS/train/HOURS_00987
0 HOURS/train/HOURS_01000
0 HOURS/val/HOURS_00027
0 HOUSE/test/HOUSE_00010
0 HOUSE/train/HOUSE_00026
0 HOUSE/train/HOUSE_00035
0 HOUSE/train/HOUSE_00101
0 HOUSE/train/HOUSE_00142
0 HOUSE/train/HOUSE_00157
0 HOUSE/train/HOUSE_00160
0 HOUSE/train/HOUSE_00167
0 HOUSE/train/HOUSE_00174
0 HOUSE/train/HOUSE_00187
0 HOUSE/train/HOUSE_00203
0 HOUSE/train/HOUSE_00209
0 HOUSE/train/HOUSE_00212
0 HOUSE/train/HOUSE_00226
0 HOUSE/train/HOUSE_00249
0 HOUSE/train/HOUSE_00270
0 HOUSE/train/HOUSE_00286
0 HOUSE/train/HOUSE_00307
0 HOUSE/train/HOUSE_00394
0 HOUSE/train/HOUSE_00460
0 HOUSE/train/HOUSE_00472
0 HOUSE/train/HOUSE_00494
0 HOUSE/train/HOUSE_00535
0 HOUSE/train/HOUSE_00591
0 HOUSE/train/HOUSE_00624
0 HOUSE/train/HOUSE_00744
0 HOUSE/train/HOUSE_00766
0 HOUSE/train/HOUSE_00787
0 HOUSE/train/HOUSE_00801
0 HOUSE/train/HOUSE_00809
0 HOUSE/train/HOUSE_00821
0 HOUSE/train/HOUSE_00857
0 HOUSE/train/HOUSE_00881
0 HOUSE/train/HOUSE_00951
0 HOUSE/train/HOUSE_00953
0 HOUSE/train/HOUSE_00962
0 HOUSE/train/HOUSE_00975
0 HOUSE/val/HOUSE_00010
0 HOUSING/test/HOUSING_00002
0 HOUSING/test/HOUSING_00016
0 HOUSING/test/HOUSING_00023
0 HOUSING/train/HOUSING_00032
0 HOUSING/train/HOUSING_00048
0 HOUSING/train/HOUSING_00158
0 HOUSING/train/HOUSING_00178
0 HOUSING/train/HOUSING_00230
0 HOUSING/train/HOUSING_00360
0 HOUSING/train/HOUSING_00392
0 HOUSING/train/HOUSING_00479
0 HOUSING/train/HOUSING_00517
0 HOUSING/train/HOUSING_00566
0 HOUSING/train/HOUSING_00620
0 HOUSING/train/HOUSING_00662
0 HOUSING/train/HOUSING_00739
0 HOUSING/train/HOUSING_00758
0 HOUSING/train/HOUSING_00806
0 HOUSING/train/HOUSING_00812
0 HOUSING/train/HOUSING_00835
0 HOUSING/train/HOUSING_00948
0 HOUSING/train/HOUSING_00959
0 HOUSING/val/HOUSING_00019
0 HOUSING/val/HOUSING_00038
0 HUMAN/test/HUMAN_00009
0 HUMAN/test/HUMAN_00022
0 HUMAN/train/HUMAN_00016
0 HUMAN/train/HUMAN_00020
0 HUMAN/train/HUMAN_00055
0 HUMAN/train/HUMAN_00079
0 HUMAN/train/HUMAN_00097
0 HUMAN/train/HUMAN_00110
0 HUMAN/train/HUMAN_00156
0 HUMAN/train/HUMAN_00205
0 HUMAN/train/HUMAN_00225
0 HUMAN/train/HUMAN_00228
0 HUMAN/train/HUMAN_00269
0 HUMAN/train/HUMAN_00293
0 HUMAN/train/HUMAN_00311
0 HUMAN/train/HUMAN_00316
0 HUMAN/train/HUMAN_00327
0 HUMAN/train/HUMAN_00371
0 HUMAN/train/HUMAN_00394
0 HUMAN/train/HUMAN_00458
0 HUMAN/train/HUMAN_00525
0 HUMAN/train/HUMAN_00531
0 HUMAN/train/HUMAN_00533
0 HUMAN/train/HUMAN_00552
0 HUMAN/train/HUMAN_00559
0 HUMAN/train/HUMAN_00560
0 HUMAN/train/HUMAN_00568
0 HUMAN/train/HUMAN_00609
0 HUMAN/train/HUMAN_00670
0 HUMAN/train/HUMAN_00742
0 HUMAN/train/HUMAN_00776
0 HUMAN/train/HUMAN_00785
0 HUMAN/train/HUMAN_00800
0 HUMAN/train/HUMAN_00875
0 HUMAN/train/HUMAN_00920
0 HUMAN/train/HUMAN_00921
0 HUMAN/train/HUMAN_00945
0 HUMAN/train/HUMAN_00970
0 HUMAN/train/HUMAN_00971
0 HUMAN/val/HUMAN_00016
0 HUNDREDS/test/HUNDREDS_00005
0 HUNDREDS/train/HUNDREDS_00024
0 HUNDREDS/train/HUNDREDS_00027
0 HUNDREDS/train/HUNDREDS_00029
0 HUNDREDS/train/HUNDREDS_00035
0 HUNDREDS/train/HUNDREDS_00038
0 HUNDREDS/train/HUNDREDS_00041
0 HUNDREDS/train/HUNDREDS_00049
0 HUNDREDS/train/HUNDREDS_00101
0 HUNDREDS/train/HUNDREDS_00108
0 HUNDREDS/train/HUNDREDS_00111
0 HUNDREDS/train/HUNDREDS_00114
0 HUNDREDS/train/HUNDREDS_00156
0 HUNDREDS/train/HUNDREDS_00160
0 HUNDREDS/train/HUNDREDS_00163
0 HUNDREDS/train/HUNDREDS_00176
0 HUNDREDS/train/HUNDREDS_00205
0 HUNDREDS/train/HUNDREDS_00207
0 HUNDREDS/train/HUNDREDS_00214
0 HUNDREDS/train/HUNDREDS_00219
0 HUNDREDS/train/HUNDREDS_00253
0 HUNDREDS/train/HUNDREDS_00264
0 HUNDREDS/train/HUNDREDS_00269
0 HUNDREDS/train/HUNDREDS_00272
0 HUNDREDS/train/HUNDREDS_00289
0 HUNDREDS/train/HUNDREDS_00290
0 HUNDREDS/train/HUNDREDS_00292
0 HUNDREDS/train/HUNDREDS_00297
0 HUNDREDS/train/HUNDREDS_00325
0 HUNDREDS/train/HUNDREDS_00341
0 HUNDREDS/train/HUNDREDS_00346
0 HUNDREDS/train/HUNDREDS_00358
0 HUNDREDS/train/HUNDREDS_00363
0 HUNDREDS/train/HUNDREDS_00365
0 HUNDREDS/train/HUNDREDS_00402
0 HUNDREDS/train/HUNDREDS_00567
0 HUNDREDS/train/HUNDREDS_00580
0 HUNDREDS/train/HUNDREDS_00589
0 HUNDREDS/train/HUNDREDS_00618
0 HUNDREDS/train/HUNDREDS_00620
0 HUNDREDS/train/HUNDREDS_00677
0 HUNDREDS/train/HUNDREDS_00678
0 HUNDREDS/train/HUNDREDS_00702
0 HUNDREDS/train/HUNDREDS_00704
0 HUNDREDS/train/HUNDREDS_00717
0 HUNDREDS/train/HUNDREDS_00739
0 HUNDREDS/train/HUNDREDS_00743
0 HUNDREDS/train/HUNDREDS_00749
0 HUNDREDS/train/HUNDREDS_00757
0 HUNDREDS/train/HUNDREDS_00760
0 HUNDREDS/train/HUNDREDS_00767
0 HUNDREDS/train/HUNDREDS_00785
0 HUNDREDS/train/HUNDREDS_00791
0 HUNDREDS/train/HUNDREDS_00792
0 HUNDREDS/train/HUNDREDS_00861
0 HUNDREDS/train/HUNDREDS_00870
0 HUNDREDS/train/HUNDREDS_00880
0 HUNDREDS/train/HUNDREDS_00883
0 HUNDREDS/train/HUNDREDS_00890
0 HUNDREDS/train/HUNDREDS_00903
0 HUNDREDS/train/HUNDREDS_00920
0 HUNDREDS/train/HUNDREDS_00931
0 HUNDREDS/train/HUNDREDS_00941
0 HUNDREDS/train/HUNDREDS_00948
0 HUNDREDS/train/HUNDREDS_00978
0 HUNDREDS/train/HUNDREDS_00992
0 HUNDREDS/train/HUNDREDS_00994
0 HUNDREDS/val/HUNDREDS_00048
0 IMMIGRATION/test/IMMIGRATION_00001
0 IMMIGRATION/test/IMMIGRATION_00026
0 IMMIGRATION/test/IMMIGRATION_00050
0 IMMIGRATION/train/IMMIGRATION_00007
0 IMMIGRATION/train/IMMIGRATION_00013
0 IMMIGRATION/train/IMMIGRATION_00014
0 IMMIGRATION/train/IMMIGRATION_00040
0 IMMIGRATION/train/IMMIGRATION_00074
0 IMMIGRATION/train/IMMIGRATION_00079
0 IMMIGRATION/train/IMMIGRATION_00085
0 IMMIGRATION/train/IMMIGRATION_00237
0 IMMIGRATION/train/IMMIGRATION_00282
0 IMMIGRATION/train/IMMIGRATION_00301
0 IMMIGRATION/train/IMMIGRATION_00381
0 IMMIGRATION/train/IMMIGRATION_00422
0 IMMIGRATION/train/IMMIGRATION_00437
0 IMMIGRATION/train/IMMIGRATION_00483
0 IMMIGRATION/train/IMMIGRATION_00538
0 IMMIGRATION/train/IMMIGRATION_00605
0 IMMIGRATION/train/IMMIGRATION_00644
0 IMMIGRATION/train/IMMIGRATION_00703
0 IMMIGRATION/train/IMMIGRATION_00708
0 IMMIGRATION/train/IMMIGRATION_00717
0 IMMIGRATION/train/IMMIGRATION_00762
0 IMMIGRATION/train/IMMIGRATION_00770
0 IMMIGRATION/train/IMMIGRATION_00818
0 IMMIGRATION/train/IMMIGRATION_00852
0 IMMIGRATION/train/IMMIGRATION_00866
0 IMMIGRATION/train/IMMIGRATION_00894
0 IMMIGRATION/train/IMMIGRATION_00906
0 IMMIGRATION/train/IMMIGRATION_00930
0 IMMIGRATION/train/IMMIGRATION_00937
0 IMMIGRATION/train/IMMIGRATION_00946
0 IMMIGRATION/val/IMMIGRATION_00005
0 IMMIGRATION/val/IMMIGRATION_00023
0 IMMIGRATION/val/IMMIGRATION_00049
0 IMPACT/test/IMPACT_00038
0 IMPACT/test/IMPACT_00044
0 IMPACT/train/IMPACT_00028
0 IMPACT/train/IMPACT_00059
0 IMPACT/train/IMPACT_00074
0 IMPACT/train/IMPACT_00079
0 IMPACT/train/IMPACT_00090
0 IMPACT/train/IMPACT_00117
0 IMPACT/train/IMPACT_00143
0 IMPACT/train/IMPACT_00155
0 IMPACT/train/IMPACT_00156
0 IMPACT/train/IMPACT_00199
0 IMPACT/train/IMPACT_00209
0 IMPACT/train/IMPACT_00232
0 IMPACT/train/IMPACT_00239
0 IMPACT/train/IMPACT_00268
0 IMPACT/train/IMPACT_00291
0 IMPACT/train/IMPACT_00296
0 IMPACT/train/IMPACT_00315
0 IMPACT/train/IMPACT_00342
0 IMPACT/train/IMPACT_00356
0 IMPACT/train/IMPACT_00360
0 IMPACT/train/IMPACT_00365
0 IMPACT/train/IMPACT_00379
0 IMPACT/train/IMPACT_00389
0 IMPACT/train/IMPACT_00444
0 IMPACT/train/IMPACT_00513
0 IMPACT/train/IMPACT_00518
0 IMPACT/train/IMPACT_00561
0 IMPACT/train/IMPACT_00584
0 IMPACT/train/IMPACT_00612
0 IMPACT/train/IMPACT_00616
0 IMPACT/train/IMPACT_00648
0 IMPACT/train/IMPACT_00676
0 IMPACT/train/IMPACT_00696
0 IMPACT/train/IMPACT_00697
0 IMPACT/train/IMPACT_00762
0 IMPACT/train/IMPACT_00781
0 IMPACT/train/IMPACT_00789
0 IMPACT/train/IMPACT_00805
0 IMPACT/train/IMPACT_00819
0 IMPACT/train/IMPACT_00828
0 IMPACT/train/IMPACT_00866
0 IMPACT/train/IMPACT_00869
0 IMPACT/train/IMPACT_00870
0 IMPACT/train/IMPACT_00876
0 IMPACT/train/IMPACT_00966
0 IMPACT/train/IMPACT_00978
0 IMPACT/train/IMPACT_00993
0 IMPACT/val/IMPACT_00020
0 IMPACT/val/IMPACT_00046
0 IMPORTANT/train/IMPORTANT_00057
0 IMPORTANT/train/IMPORTANT_00130
0 IMPORTANT/train/IMPORTANT_00195
0 IMPORTANT/train/IMPORTANT_00253
0 IMPORTANT/train/IMPORTANT_00578
0 IMPORTANT/train/IMPORTANT_00594
0 IMPORTANT/train/IMPORTANT_00654
0 IMPORTANT/train/IMPORTANT_00740
0 IMPORTANT/train/IMPORTANT_00773
0 IMPORTANT/train/IMPORTANT_00979
0 IMPORTANT/val/IMPORTANT_00023
0 INCREASE/test/INCREASE_00031
0 INCREASE/train/INCREASE_00026
0 INCREASE/train/INCREASE_00036
0 INCREASE/train/INCREASE_00045
0 INCREASE/train/INCREASE_00049
0 INCREASE/train/INCREASE_00077
0 INCREASE/train/INCREASE_00082
0 INCREASE/train/INCREASE_00083
0 INCREASE/train/INCREASE_00088
0 INCREASE/train/INCREASE_00092
0 INCREASE/train/INCREASE_00149
0 INCREASE/train/INCREASE_00158
0 INCREASE/train/INCREASE_00194
0 INCREASE/train/INCREASE_00201
0 INCREASE/train/INCREASE_00348
0 INCREASE/train/INCREASE_00390
0 INCREASE/train/INCREASE_00401
0 INCREASE/train/INCREASE_00419
0 INCREASE/train/INCREASE_00439
0 INCREASE/train/INCREASE_00487
0 INCREASE/train/INCREASE_00540
0 INCREASE/train/INCREASE_00546
0 INCREASE/train/INCREASE_00576
0 INCREASE/train/INCREASE_00578
0 INCREASE/train/INCREASE_00596
0 INCREASE/train/INCREASE_00620
0 INCREASE/train/INCREASE_00636
0 INCREASE/train/INCREASE_00660
0 INCREASE/train/INCREASE_00668
0 INCREASE/train/INCREASE_00724
0 INCREASE/train/INCREASE_00730
0 INCREASE/train/INCREASE_00775
0 INCREASE/train/INCREASE_00805
0 INCREASE/train/INCREASE_00806
0 INCREASE/train/INCREASE_00829
0 INCREASE/train/INCREASE_00831
0 INCREASE/train/INCREASE_00844
0 INCREASE/train/INCREASE_00853
0 INCREASE/train/INCREASE_00889
0 INCREASE/train/INCREASE_00939
0 INCREASE/train/INCREASE_00962
0 INCREASE/train/INCREASE_00968
0 INCREASE/val/INCREASE_00021
0 INDEPENDENT/test/INDEPENDENT_00012
0 INDEPENDENT/test/INDEPENDENT_00013
0 INDEPENDENT/test/INDEPENDENT_00045
0 INDEPENDENT/test/INDEPENDENT_00050
0 INDEPENDENT/train/INDEPENDENT_00006
0 INDEPENDENT/train/INDEPENDENT_00023
0 INDEPENDENT/train/INDEPENDENT_00048
0 INDEPENDENT/train/INDEPENDENT_00072
0 INDEPENDENT/train/INDEPENDENT_00083
0 INDEPENDENT/train/INDEPENDENT_00090
0 INDEPENDENT/train/INDEPENDENT_00114
0 INDEPENDENT/train/INDEPENDENT_00121
0 INDEPENDENT/train/INDEPENDENT_00130
0 INDEPENDENT/train/INDEPENDENT_00137
0 INDEPENDENT/train/INDEPENDENT_00172
0 INDEPENDENT/train/INDEPENDENT_00181
0 INDEPENDENT/train/INDEPENDENT_00197
0 INDEPENDENT/train/INDEPENDENT_00212
0 INDEPENDENT/train/INDEPENDENT_00226
0 INDEPENDENT/train/INDEPENDENT_00249
0 INDEPENDENT/train/INDEPENDENT_00256
0 INDEPENDENT/train/INDEPENDENT_00264
0 INDEPENDENT/train/INDEPENDENT_00291
0 INDEPENDENT/train/INDEPENDENT_00308
0 INDEPENDENT/train/INDEPENDENT_00338
0 INDEPENDENT/train/INDEPENDENT_00357
0 INDEPENDENT/train/INDEPENDENT_00380
0 INDEPENDENT/train/INDEPENDENT_00383
0 INDEPENDENT/train/INDEPENDENT_00390
0 INDEPENDENT/train/INDEPENDENT_00430
0 INDEPENDENT/train/INDEPENDENT_00465
0 INDEPENDENT/train/INDEPENDENT_00470
0 INDEPENDENT/train/INDEPENDENT_00480
0 INDEPENDENT/train/INDEPENDENT_00510
0 INDEPENDENT/train/INDEPENDENT_00520
0 INDEPENDENT/train/INDEPENDENT_00549
0 INDEPENDENT/train/INDEPENDENT_00567
0 INDEPENDENT/train/INDEPENDENT_00584
0 INDEPENDENT/train/INDEPENDENT_00586
0 INDEPENDENT/train/INDEPENDENT_00616
0 INDEPENDENT/train/INDEPENDENT_00619
0 INDEPENDENT/train/INDEPENDENT_00625
0 INDEPENDENT/train/INDEPENDENT_00635
0 INDEPENDENT/train/INDEPENDENT_00671
0 INDEPENDENT/train/INDEPENDENT_00711
0 INDEPENDENT/train/INDEPENDENT_00717
0 INDEPENDENT/train/INDEPENDENT_00721
0 INDEPENDENT/train/INDEPENDENT_00728
0 INDEPENDENT/train/INDEPENDENT_00731
0 INDEPENDENT/train/INDEPENDENT_00746
0 INDEPENDENT/train/INDEPENDENT_00750
0 INDEPENDENT/train/INDEPENDENT_00802
0 INDEPENDENT/train/INDEPENDENT_00809
0 INDEPENDENT/train/INDEPENDENT_00817
0 INDEPENDENT/train/INDEPENDENT_00824
0 INDEPENDENT/train/INDEPENDENT_00869
0 INDEPENDENT/train/INDEPENDENT_00885
0 INDEPENDENT/train/INDEPENDENT_00947
0 INDEPENDENT/train/INDEPENDENT_00961
0 INDEPENDENT/train/INDEPENDENT_00962
0 INDEPENDENT/val/INDEPENDENT_00011
0 INDEPENDENT/val/INDEPENDENT_00031
0 INDEPENDENT/val/INDEPENDENT_00040
0 INDEPENDENT/val/INDEPENDENT_00043
0 INDEPENDENT/val/INDEPENDENT_00049
0 INDUSTRY/train/INDUSTRY_00004
0 INDUSTRY/train/INDUSTRY_00018
0 INDUSTRY/train/INDUSTRY_00030
0 INDUSTRY/train/INDUSTRY_00085
0 INDUSTRY/train/INDUSTRY_00132
0 INDUSTRY/train/INDUSTRY_00160
0 INDUSTRY/train/INDUSTRY_00172
0 INDUSTRY/train/INDUSTRY_00188
0 INDUSTRY/train/INDUSTRY_00218
0 INDUSTRY/train/INDUSTRY_00240
0 INDUSTRY/train/INDUSTRY_00291
0 INDUSTRY/train/INDUSTRY_00308
0 INDUSTRY/train/INDUSTRY_00332
0 INDUSTRY/train/INDUSTRY_00341
0 INDUSTRY/train/INDUSTRY_00358
0 INDUSTRY/train/INDUSTRY_00367
0 INDUSTRY/train/INDUSTRY_00371
0 INDUSTRY/train/INDUSTRY_00372
0 INDUSTRY/train/INDUSTRY_00425
0 INDUSTRY/train/INDUSTRY_00430
0 INDUSTRY/train/INDUSTRY_00451
0 INDUSTRY/train/INDUSTRY_00477
0 INDUSTRY/train/INDUSTRY_00496
0 INDUSTRY/train/INDUSTRY_00528
0 INDUSTRY/train/INDUSTRY_00535
0 INDUSTRY/train/INDUSTRY_00566
0 INDUSTRY/train/INDUSTRY_00631
0 INDUSTRY/train/INDUSTRY_00637
0 INDUSTRY/train/INDUSTRY_00638
0 INDUSTRY/train/INDUSTRY_00651
0 INDUSTRY/train/INDUSTRY_00690
0 INDUSTRY/train/INDUSTRY_00714
0 INDUSTRY/train/INDUSTRY_00716
0 INDUSTRY/train/INDUSTRY_00734
0 INDUSTRY/train/INDUSTRY_00741
0 INDUSTRY/train/INDUSTRY_00831
0 INDUSTRY/train/INDUSTRY_00832
0 INDUSTRY/train/INDUSTRY_00860
0 INDUSTRY/train/INDUSTRY_00867
0 INDUSTRY/train/INDUSTRY_00870
0 INDUSTRY/train/INDUSTRY_00889
0 INDUSTRY/train/INDUSTRY_00935
0 INDUSTRY/val/INDUSTRY_00010
0 INFLATION/test/INFLATION_00018
0 INFLATION/train/INFLATION_00002
0 INFLATION/train/INFLATION_00004
0 INFLATION/train/INFLATION_00041
0 INFLATION/train/INFLATION_00043
0 INFLATION/train/INFLATION_00048
0 INFLATION/train/INFLATION_00068
0 INFLATION/train/INFLATION_00080
0 INFLATION/train/INFLATION_00123
0 INFLATION/train/INFLATION_00133
0 INFLATION/train/INFLATION_00136
0 INFLATION/train/INFLATION_00139
0 INFLATION/train/INFLATION_00174
0 INFLATION/train/INFLATION_00204
0 INFLATION/train/INFLATION_00312
0 INFLATION/train/INFLATION_00321
0 INFLATION/train/INFLATION_00350
0 INFLATION/train/INFLATION_00411
0 INFLATION/train/INFLATION_00453
0 INFLATION/train/INFLATION_00478
0 INFLATION/train/INFLATION_00542
0 INFLATION/train/INFLATION_00581
0 INFLATION/train/INFLATION_00582
0 INFLATION/train/INFLATION_00692
0 INFLATION/train/INFLATION_00705
0 INFLATION/train/INFLATION_00752
0 INFLATION/train/INFLATION_00761
0 INFLATION/train/INFLATION_00778
0 INFLATION/train/INFLATION_00799
0 INFLATION/val/INFLATION_00002
0 INFLATION/val/INFLATION_00003
0 INFLATION/val/INFLATION_00005
0 INFORMATION/train/INFORMATION_00099
0 INFORMATION/train/INFORMATION_00106
0 INFORMATION/train/INFORMATION_00132
0 INFORMATION/train/INFORMATION_00211
0 INFORMATION/train/INFORMATION_00238
0 INFORMATION/train/INFORMATION_00269
0 INFORMATION/train/INFORMATION_00387
0 INFORMATION/train/INFORMATION_00450
0 INFORMATION/train/INFORMATION_00479
0 INFORMATION/train/INFORMATION_00505
0 INFORMATION/train/INFORMATION_00643
0 INFORMATION/train/INFORMATION_00648
0 INFORMATION/train/INFORMATION_00689
0 INFORMATION/train/INFORMATION_00706
0 INFORMATION/train/INFORMATION_00726
0 INFORMATION/train/INFORMATION_00791
0 INFORMATION/train/INFORMATION_00965
0 INQUIRY/test/INQUIRY_00008
0 INQUIRY/test/INQUIRY_00029
0 INQUIRY/test/INQUIRY_00037
0 INQUIRY/test/INQUIRY_00038
0 INQUIRY/test/INQUIRY_00041
0 INQUIRY/train/INQUIRY_00002
0 INQUIRY/train/INQUIRY_00006
0 INQUIRY/train/INQUIRY_00010
0 INQUIRY/train/INQUIRY_00022
0 INQUIRY/train/INQUIRY_00033
0 INQUIRY/train/INQUIRY_00055
0 INQUIRY/train/INQUIRY_00077
0 INQUIRY/train/INQUIRY_00086
0 INQUIRY/train/INQUIRY_00088
0 INQUIRY/train/INQUIRY_00089
0 INQUIRY/train/INQUIRY_00090
0 INQUIRY/train/INQUIRY_00114
0 INQUIRY/train/INQUIRY_00118
0 INQUIRY/train/INQUIRY_00129
0 INQUIRY/train/INQUIRY_00132
0 INQUIRY/train/INQUIRY_00138
0 INQUIRY/train/INQUIRY_00144
0 INQUIRY/train/INQUIRY_00154
0 INQUIRY/train/INQUIRY_00155
0 INQUIRY/train/INQUIRY_00162
0 INQUIRY/train/INQUIRY_00179
0 INQUIRY/train/INQUIRY_00183
0 INQUIRY/train/INQUIRY_00200
0 INQUIRY/train/INQUIRY_00216
0 INQUIRY/train/INQUIRY_00221
0 INQUIRY/train/INQUIRY_00229
0 INQUIRY/train/INQUIRY_00230
0 INQUIRY/train/INQUIRY_00235
0 INQUIRY/train/INQUIRY_00242
0 INQUIRY/train/INQUIRY_00266
0 INQUIRY/train/INQUIRY_00282
0 INQUIRY/train/INQUIRY_00290
0 INQUIRY/train/INQUIRY_00305
0 INQUIRY/train/INQUIRY_00318
0 INQUIRY/train/INQUIRY_00344
0 INQUIRY/train/INQUIRY_00348
0 INQUIRY/train/INQUIRY_00353
0 INQUIRY/train/INQUIRY_00376
0 INQUIRY/train/INQUIRY_00383
0 INQUIRY/train/INQUIRY_00388
0 INQUIRY/train/INQUIRY_00393
0 INQUIRY/train/INQUIRY_00395
0 INQUIRY/train/INQUIRY_00396
0 INQUIRY/train/INQUIRY_00405
0 INQUIRY/train/INQUIRY_00407
0 INQUIRY/train/INQUIRY_00408
0 INQUIRY/train/INQUIRY_00417
0 INQUIRY/train/INQUIRY_00438
0 INQUIRY/train/INQUIRY_00439
0 INQUIRY/train/INQUIRY_00451
0 INQUIRY/train/INQUIRY_00460
0 INQUIRY/train/INQUIRY_00469
0 INQUIRY/train/INQUIRY_00500
0 INQUIRY/train/INQUIRY_00524
0 INQUIRY/train/INQUIRY_00533
0 INQUIRY/train/INQUIRY_00534
0 INQUIRY/train/INQUIRY_00546
0 INQUIRY/train/INQUIRY_00557
0 INQUIRY/train/INQUIRY_00567
0 INQUIRY/train/INQUIRY_00571
0 INQUIRY/train/INQUIRY_00572
0 INQUIRY/train/INQUIRY_00604
0 INQUIRY/train/INQUIRY_00636
0 INQUIRY/train/INQUIRY_00672
0 INQUIRY/train/INQUIRY_00674
0 INQUIRY/train/INQUIRY_00687
0 INQUIRY/train/INQUIRY_00692
0 INQUIRY/train/INQUIRY_00698
0 INQUIRY/train/INQUIRY_00731
0 INQUIRY/train/INQUIRY_00750
0 INQUIRY/train/INQUIRY_00756
0 INQUIRY/train/INQUIRY_00757
0 INQUIRY/train/INQUIRY_00766
0 INQUIRY/train/INQUIRY_00776
0 INQUIRY/train/INQUIRY_00781
0 INQUIRY/train/INQUIRY_00806
0 INQUIRY/train/INQUIRY_00811
0 INQUIRY/train/INQUIRY_00822
0 INQUIRY/train/INQUIRY_00824
0 INQUIRY/train/INQUIRY_00828
0 INQUIRY/train/INQUIRY_00829
0 INQUIRY/train/INQUIRY_00840
0 INQUIRY/train/INQUIRY_00841
0 INQUIRY/train/INQUIRY_00842
0 INQUIRY/train/INQUIRY_00845
0 INQUIRY/train/INQUIRY_00856
0 INQUIRY/train/INQUIRY_00866
0 INQUIRY/train/INQUIRY_00875
0 INQUIRY/train/INQUIRY_00886
0 INQUIRY/train/INQUIRY_00888
0 INQUIRY/train/INQUIRY_00896
0 INQUIRY/train/INQUIRY_00907
0 INQUIRY/train/INQUIRY_00930
0 INQUIRY/train/INQUIRY_00943
0 INQUIRY/train/INQUIRY_00957
0 INQUIRY/train/INQUIRY_00988
0 INQUIRY/train/INQUIRY_00994
0 INQUIRY/val/INQUIRY_00013
0 INQUIRY/val/INQUIRY_00018
0 INQUIRY/val/INQUIRY_00031
0 INQUIRY/val/INQUIRY_00046
0 INSIDE/train/INSIDE_00100
0 INSIDE/train/INSIDE_00147
0 INSIDE/train/INSIDE_00178
0 INSIDE/train/INSIDE_00226
0 INSIDE/train/INSIDE_00352
0 INSIDE/train/INSIDE_00452
0 INSIDE/train/INSIDE_00492
0 INSIDE/train/INSIDE_00516
0 INSIDE/train/INSIDE_00539
0 INSIDE/train/INSIDE_00615
0 INSIDE/train/INSIDE_00680
0 INSIDE/train/INSIDE_00695
0 INSIDE/train/INSIDE_00733
0 INSIDE/train/INSIDE_00803
0 INSIDE/train/INSIDE_00805
0 INSIDE/train/INSIDE_00823
0 INSIDE/train/INSIDE_00925
0 INTEREST/train/INTEREST_00047
0 INTEREST/train/INTEREST_00066
0 INTEREST/train/INTEREST_00068
0 INTEREST/train/INTEREST_00149
0 INTEREST/train/INTEREST_00225
0 INTEREST/train/INTEREST_00230
0 INTEREST/train/INTEREST_00237
0 INTEREST/train/INTEREST_00261
0 INTEREST/train/INTEREST_00266
0 INTEREST/train/INTEREST_00292
0 INTEREST/train/INTEREST_00300
0 INTEREST/train/INTEREST_00317
0 INTEREST/train/INTEREST_00324
0 INTEREST/train/INTEREST_00334
0 INTEREST/train/INTEREST_00398
0 INTEREST/train/INTEREST_00404
0 INTEREST/train/INTEREST_00409
0 INTEREST/train/INTEREST_00422
0 INTEREST/train/INTEREST_00441
0 INTEREST/train/INTEREST_00443
0 INTEREST/train/INTEREST_00460
0 INTEREST/train/INTEREST_00474
0 INTEREST/train/INTEREST_00548
0 INTEREST/train/INTEREST_00754
0 INTEREST/train/INTEREST_00834
0 INTEREST/train/INTEREST_00907
0 INTEREST/train/INTEREST_00921
0 INTEREST/train/INTEREST_00922
0 INTEREST/train/INTEREST_00956
0 INVESTMENT/test/INVESTMENT_00022
0 INVESTMENT/test/INVESTMENT_00030
0 INVESTMENT/train/INVESTMENT_00082
0 INVESTMENT/train/INVESTMENT_00095
0 INVESTMENT/train/INVESTMENT_00149
0 INVESTMENT/train/INVESTMENT_00225
0 INVESTMENT/train/INVESTMENT_00247
0 INVESTMENT/train/INVESTMENT_00302
0 INVESTMENT/train/INVESTMENT_00366
0 INVESTMENT/train/INVESTMENT_00452
0 INVESTMENT/train/INVESTMENT_00475
0 INVESTMENT/train/INVESTMENT_00477
0 INVESTMENT/train/INVESTMENT_00530
0 INVESTMENT/train/INVESTMENT_00591
0 INVESTMENT/train/INVESTMENT_00592
0 INVESTMENT/train/INVESTMENT_00605
0 INVESTMENT/train/INVESTMENT_00658
0 INVESTMENT/train/INVESTMENT_00661
0 INVESTMENT/train/INVESTMENT_00707
0 INVESTMENT/train/INVESTMENT_00728
0 INVESTMENT/train/INVESTMENT_00754
0 INVESTMENT/train/INVESTMENT_00797
0 INVESTMENT/train/INVESTMENT_00803
0 INVESTMENT/train/INVESTMENT_00805
0 INVESTMENT/val/INVESTMENT_00040
0 INVOLVED/test/INVOLVED_00005
0 INVOLVED/test/INVOLVED_00031
0 INVOLVED/train/INVOLVED_00020
0 INVOLVED/train/INVOLVED_00067
0 INVOLVED/train/INVOLVED_00096
0 INVOLVED/train/INVOLVED_00106
0 INVOLVED/train/INVOLVED_00192
0 INVOLVED/train/INVOLVED_00221
0 INVOLVED/train/INVOLVED_00254
0 INVOLVED/train/INVOLVED_00275
0 INVOLVED/train/INVOLVED_00277
0 INVOLVED/train/INVOLVED_00279
0 INVOLVED/train/INVOLVED_00357
0 INVOLVED/train/INVOLVED_00363
0 INVOLVED/train/INVOLVED_00399
0 INVOLVED/train/INVOLVED_00533
0 INVOLVED/train/INVOLVED_00538
0 INVOLVED/train/INVOLVED_00609
0 INVOLVED/train/INVOLVED_00688
0 INVOLVED/train/INVOLVED_00702
0 INVOLVED/train/INVOLVED_00726
0 INVOLVED/train/INVOLVED_00744
0 INVOLVED/train/INVOLVED_00762
0 INVOLVED/train/INVOLVED_00829
0 INVOLVED/train/INVOLVED_00830
0 INVOLVED/train/INVOLVED_00839
0 INVOLVED/train/INVOLVED_00847
0 INVOLVED/train/INVOLVED_00852
0 INVOLVED/train/INVOLVED_00854
0 INVOLVED/train/INVOLVED_00924
0 INVOLVED/train/INVOLVED_00997
0 IRELAND/test/IRELAND_00025
0 IRELAND/train/IRELAND_00096
0 IRELAND/train/IRELAND_00148
0 IRELAND/train/IRELAND_00181
0 IRELAND/train/IRELAND_00192
0 IRELAND/train/IRELAND_00241
0 IRELAND/train/IRELAND_00331
0 IRELAND/train/IRELAND_00355
0 IRELAND/train/IRELAND_00364
0 IRELAND/train/IRELAND_00377
0 IRELAND/train/IRELAND_00390
0 IRELAND/train/IRELAND_00430
0 IRELAND/train/IRELAND_00449
0 IRELAND/train/IRELAND_00451
0 IRELAND/train/IRELAND_00487
0 IRELAND/train/IRELAND_00488
0 IRELAND/train/IRELAND_00516
0 IRELAND/train/IRELAND_00521
0 IRELAND/train/IRELAND_00553
0 IRELAND/train/IRELAND_00556
0 IRELAND/train/IRELAND_00654
0 IRELAND/train/IRELAND_00688
0 IRELAND/train/IRELAND_00709
0 IRELAND/train/IRELAND_00736
0 IRELAND/train/IRELAND_00756
0 IRELAND/train/IRELAND_00761
0 IRELAND/train/IRELAND_00766
0 IRELAND/train/IRELAND_00770
0 IRELAND/train/IRELAND_00806
0 IRELAND/train/IRELAND_00822
0 IRELAND/train/IRELAND_00824
0 IRELAND/train/IRELAND_00879
0 IRELAND/train/IRELAND_00907
0 IRELAND/train/IRELAND_00943
0 IRELAND/val/IRELAND_00001
0 IRELAND/val/IRELAND_00050
0 ISLAMIC/test/ISLAMIC_00004
0 ISLAMIC/test/ISLAMIC_00005
0 ISLAMIC/test/ISLAMIC_00007
0 ISLAMIC/test/ISLAMIC_00017
0 ISLAMIC/train/ISLAMIC_00013
0 ISLAMIC/train/ISLAMIC_00014
0 ISLAMIC/train/ISLAMIC_00063
0 ISLAMIC/train/ISLAMIC_00081
0 ISLAMIC/train/ISLAMIC_00113
0 ISLAMIC/train/ISLAMIC_00135
0 ISLAMIC/train/ISLAMIC_00146
0 ISLAMIC/train/ISLAMIC_00171
0 ISLAMIC/train/ISLAMIC_00183
0 ISLAMIC/train/ISLAMIC_00211
0 ISLAMIC/train/ISLAMIC_00217
0 ISLAMIC/train/ISLAMIC_00278
0 ISLAMIC/train/ISLAMIC_00313
0 ISLAMIC/train/ISLAMIC_00322
0 ISLAMIC/train/ISLAMIC_00385
0 ISLAMIC/train/ISLAMIC_00402
0 ISLAMIC/train/ISLAMIC_00413
0 ISLAMIC/train/ISLAMIC_00414
0 ISLAMIC/train/ISLAMIC_00418
0 ISLAMIC/train/ISLAMIC_00422
0 ISLAMIC/train/ISLAMIC_00457
0 ISLAMIC/train/ISLAMIC_00476
0 ISLAMIC/train/ISLAMIC_00479
0 ISLAMIC/train/ISLAMIC_00555
0 ISLAMIC/train/ISLAMIC_00603
0 ISLAMIC/train/ISLAMIC_00618
0 ISLAMIC/train/ISLAMIC_00635
0 ISLAMIC/train/ISLAMIC_00690
0 ISLAMIC/train/ISLAMIC_00702
0 ISLAMIC/train/ISLAMIC_00717
0 ISLAMIC/train/ISLAMIC_00730
0 ISLAMIC/train/ISLAMIC_00734
0 ISLAMIC/train/ISLAMIC_00752
0 ISLAMIC/train/ISLAMIC_00755
0 ISLAMIC/train/ISLAMIC_00817
0 ISLAMIC/train/ISLAMIC_00820
0 ISLAMIC/train/ISLAMIC_00824
0 ISLAMIC/train/ISLAMIC_00858
0 ISLAMIC/train/ISLAMIC_00868
0 ISLAMIC/train/ISLAMIC_00871
0 ISLAMIC/train/ISLAMIC_00880
0 ISLAMIC/train/ISLAMIC_00924
0 ISLAMIC/train/ISLAMIC_00925
0 ISLAMIC/train/ISLAMIC_00934
0 ISLAMIC/train/ISLAMIC_00972
0 ISLAMIC/val/ISLAMIC_00022
0 ISLAMIC/val/ISLAMIC_00032
0 ISLAMIC/val/ISLAMIC_00035
0 ISLAMIC/val/ISLAMIC_00036
0 ISLAMIC/val/ISLAMIC_00037
0 ISLAMIC/val/ISLAMIC_00041
0 ISSUES/train/ISSUES_00076
0 ISSUES/train/ISSUES_00111
0 ISSUES/train/ISSUES_00315
0 ISSUES/train/ISSUES_00334
0 ISSUES/train/ISSUES_00524
0 ISSUES/train/ISSUES_00527
0 ISSUES/train/ISSUES_00674
0 ISSUES/train/ISSUES_00736
0 ISSUES/train/ISSUES_00941
0 ISSUES/val/ISSUES_00011
0 ISSUES/val/ISSUES_00044
0 ISSUE/train/ISSUE_00135
0 ISSUE/train/ISSUE_00149
0 ISSUE/train/ISSUE_00296
0 ISSUE/train/ISSUE_00571
0 ISSUE/train/ISSUE_00667
0 ISSUE/train/ISSUE_00744
0 ISSUE/train/ISSUE_00768
0 ISSUE/train/ISSUE_00791
0 ISSUE/train/ISSUE_00864
0 ITSELF/train/ITSELF_00057
0 ITSELF/train/ITSELF_00180
0 ITSELF/train/ITSELF_00288
0 ITSELF/train/ITSELF_00364
0 ITSELF/train/ITSELF_00639
0 ITSELF/train/ITSELF_00644
0 ITSELF/train/ITSELF_00718
0 ITSELF/train/ITSELF_00894
0 ITSELF/train/ITSELF_00915
0 ITSELF/val/ITSELF_00012
0 ITSELF/val/ITSELF_00014
0 JAMES/test/JAMES_00013
0 JAMES/test/JAMES_00031
0 JAMES/test/JAMES_00038
0 JAMES/test/JAMES_00040
0 JAMES/train/JAMES_00021
0 JAMES/train/JAMES_00023
0 JAMES/train/JAMES_00027
0 JAMES/train/JAMES_00035
0 JAMES/train/JAMES_00037
0 JAMES/train/JAMES_00040
0 JAMES/train/JAMES_00055
0 JAMES/train/JAMES_00060
0 JAMES/train/JAMES_00061
0 JAMES/train/JAMES_00068
0 JAMES/train/JAMES_00082
0 JAMES/train/JAMES_00084
0 JAMES/train/JAMES_00085
0 JAMES/train/JAMES_00091
0 JAMES/train/JAMES_00094
0 JAMES/train/JAMES_00100
0 JAMES/train/JAMES_00106
0 JAMES/train/JAMES_00109
0 JAMES/train/JAMES_00113
0 JAMES/train/JAMES_00115
0 JAMES/train/JAMES_00116
0 JAMES/train/JAMES_00158
0 JAMES/train/JAMES_00163
0 JAMES/train/JAMES_00173
0 JAMES/train/JAMES_00180
0 JAMES/train/JAMES_00183
0 JAMES/train/JAMES_00186
0 JAMES/train/JAMES_00200
0 JAMES/train/JAMES_00204
0 JAMES/train/JAMES_00206
0 JAMES/train/JAMES_00217
0 JAMES/train/JAMES_00226
0 JAMES/train/JAMES_00230
0 JAMES/train/JAMES_00235
0 JAMES/train/JAMES_00236
0 JAMES/train/JAMES_00242
0 JAMES/train/JAMES_00284
0 JAMES/train/JAMES_00286
0 JAMES/train/JAMES_00291
0 JAMES/train/JAMES_00293
0 JAMES/train/JAMES_00295
0 JAMES/train/JAMES_00296
0 JAMES/train/JAMES_00298
0 JAMES/train/JAMES_00339
0 JAMES/train/JAMES_00341
0 JAMES/train/JAMES_00363
0 JAMES/train/JAMES_00395
0 JAMES/train/JAMES_00407
0 JAMES/train/JAMES_00415
0 JAMES/train/JAMES_00422
0 JAMES/train/JAMES_00423
0 JAMES/train/JAMES_00430
0 JAMES/train/JAMES_00444
0 JAMES/train/JAMES_00448
0 JAMES/train/JAMES_00450
0 JAMES/train/JAMES_00451
0 JAMES/train/JAMES_00453
0 JAMES/train/JAMES_00460
0 JAMES/train/JAMES_00484
0 JAMES/train/JAMES_00504
0 JAMES/train/JAMES_00512
0 JAMES/train/JAMES_00521
0 JAMES/train/JAMES_00530
0 JAMES/train/JAMES_00533
0 JAMES/train/JAMES_00538
0 JAMES/train/JAMES_00539
0 JAMES/train/JAMES_00547
0 JAMES/train/JAMES_00558
0 JAMES/train/JAMES_00569
0 JAMES/train/JAMES_00591
0 JAMES/train/JAMES_00602
0 JAMES/train/JAMES_00609
0 JAMES/train/JAMES_00630
0 JAMES/train/JAMES_00632
0 JAMES/train/JAMES_00635
0 JAMES/train/JAMES_00641
0 JAMES/train/JAMES_00656
0 JAMES/train/JAMES_00674
0 JAMES/train/JAMES_00676
0 JAMES/train/JAMES_00680
0 JAMES/train/JAMES_00687
0 JAMES/train/JAMES_00691
0 JAMES/train/JAMES_00693
0 JAMES/train/JAMES_00695
0 JAMES/train/JAMES_00706
0 JAMES/train/JAMES_00707
0 JAMES/train/JAMES_00731
0 JAMES/train/JAMES_00735
0 JAMES/train/JAMES_00737
0 JAMES/train/JAMES_00743
0 JAMES/train/JAMES_00748
0 JAMES/train/JAMES_00752
0 JAMES/train/JAMES_00755
0 JAMES/train/JAMES_00757
0 JAMES/train/JAMES_00764
0 JAMES/train/JAMES_00765
0 JAMES/train/JAMES_00766
0 JAMES/train/JAMES_00778
0 JAMES/train/JAMES_00782
0 JAMES/train/JAMES_00787
0 JAMES/train/JAMES_00810
0 JAMES/train/JAMES_00821
0 JAMES/train/JAMES_00827
0 JAMES/train/JAMES_00831
0 JAMES/train/JAMES_00832
0 JAMES/train/JAMES_00836
0 JAMES/train/JAMES_00842
0 JAMES/val/JAMES_00002
0 JAMES/val/JAMES_00023
0 JAMES/val/JAMES_00033
0 JAMES/val/JAMES_00035
0 JAMES/val/JAMES_00039
0 JUDGE/test/JUDGE_00005
0 JUDGE/test/JUDGE_00048
0 JUDGE/test/JUDGE_00049
0 JUDGE/test/JUDGE_00050
0 JUDGE/train/JUDGE_00019
0 JUDGE/train/JUDGE_00042
0 JUDGE/train/JUDGE_00096
0 JUDGE/train/JUDGE_00102
0 JUDGE/train/JUDGE_00103
0 JUDGE/train/JUDGE_00115
0 JUDGE/train/JUDGE_00129
0 JUDGE/train/JUDGE_00178
0 JUDGE/train/JUDGE_00210
0 JUDGE/train/JUDGE_00213
0 JUDGE/train/JUDGE_00219
0 JUDGE/train/JUDGE_00240
0 JUDGE/train/JUDGE_00242
0 JUDGE/train/JUDGE_00244
0 JUDGE/train/JUDGE_00272
0 JUDGE/train/JUDGE_00276
0 JUDGE/train/JUDGE_00287
0 JUDGE/train/JUDGE_00302
0 JUDGE/train/JUDGE_00347
0 JUDGE/train/JUDGE_00362
0 JUDGE/train/JUDGE_00393
0 JUDGE/train/JUDGE_00399
0 JUDGE/train/JUDGE_00424
0 JUDGE/train/JUDGE_00469
0 JUDGE/train/JUDGE_00517
0 JUDGE/train/JUDGE_00522
0 JUDGE/train/JUDGE_00560
0 JUDGE/train/JUDGE_00570
0 JUDGE/train/JUDGE_00578
0 JUDGE/train/JUDGE_00605
0 JUDGE/train/JUDGE_00651
0 JUDGE/train/JUDGE_00717
0 JUDGE/train/JUDGE_00755
0 JUDGE/train/JUDGE_00761
0 JUDGE/train/JUDGE_00762
0 JUDGE/train/JUDGE_00779
0 JUDGE/train/JUDGE_00817
0 JUDGE/train/JUDGE_00818
0 JUDGE/train/JUDGE_00822
0 JUDGE/train/JUDGE_00824
0 JUDGE/val/JUDGE_00008
0 JUSTICE/train/JUSTICE_00012
0 JUSTICE/train/JUSTICE_00015
0 JUSTICE/train/JUSTICE_00026
0 JUSTICE/train/JUSTICE_00057
0 JUSTICE/train/JUSTICE_00071
0 JUSTICE/train/JUSTICE_00076
0 JUSTICE/train/JUSTICE_00108
0 JUSTICE/train/JUSTICE_00150
0 JUSTICE/train/JUSTICE_00188
0 JUSTICE/train/JUSTICE_00216
0 JUSTICE/train/JUSTICE_00230
0 JUSTICE/train/JUSTICE_00239
0 JUSTICE/train/JUSTICE_00254
0 JUSTICE/train/JUSTICE_00279
0 JUSTICE/train/JUSTICE_00282
0 JUSTICE/train/JUSTICE_00329
0 JUSTICE/train/JUSTICE_00335
0 JUSTICE/train/JUSTICE_00343
0 JUSTICE/train/JUSTICE_00405
0 JUSTICE/train/JUSTICE_00429
0 JUSTICE/train/JUSTICE_00456
0 JUSTICE/train/JUSTICE_00481
0 JUSTICE/train/JUSTICE_00501
0 JUSTICE/train/JUSTICE_00508
0 JUSTICE/train/JUSTICE_00513
0 JUSTICE/train/JUSTICE_00593
0 JUSTICE/train/JUSTICE_00630
0 JUSTICE/train/JUSTICE_00632
0 JUSTICE/train/JUSTICE_00636
0 JUSTICE/train/JUSTICE_00638
0 JUSTICE/train/JUSTICE_00643
0 JUSTICE/train/JUSTICE_00656
0 JUSTICE/train/JUSTICE_00685
0 JUSTICE/train/JUSTICE_00716
0 JUSTICE/train/JUSTICE_00722
0 JUSTICE/train/JUSTICE_00757
0 JUSTICE/train/JUSTICE_00776
0 JUSTICE/train/JUSTICE_00813
0 JUSTICE/train/JUSTICE_00819
0 JUSTICE/train/JUSTICE_00832
0 JUSTICE/train/JUSTICE_00868
0 JUSTICE/train/JUSTICE_00876
0 JUSTICE/train/JUSTICE_00908
0 JUSTICE/val/JUSTICE_00001
0 JUSTICE/val/JUSTICE_00027
0 KILLED/test/KILLED_00017
0 KILLED/test/KILLED_00018
0 KILLED/train/KILLED_00022
0 KILLED/train/KILLED_00048
0 KILLED/train/KILLED_00078
0 KILLED/train/KILLED_00101
0 KILLED/train/KILLED_00144
0 KILLED/train/KILLED_00151
0 KILLED/train/KILLED_00166
0 KILLED/train/KILLED_00170
0 KILLED/train/KILLED_00191
0 KILLED/train/KILLED_00224
0 KILLED/train/KILLED_00242
0 KILLED/train/KILLED_00254
0 KILLED/train/KILLED_00311
0 KILLED/train/KILLED_00313
0 KILLED/train/KILLED_00390
0 KILLED/train/KILLED_00415
0 KILLED/train/KILLED_00431
0 KILLED/train/KILLED_00453
0 KILLED/train/KILLED_00459
0 KILLED/train/KILLED_00475
0 KILLED/train/KILLED_00507
0 KILLED/train/KILLED_00523
0 KILLED/train/KILLED_00538
0 KILLED/train/KILLED_00565
0 KILLED/train/KILLED_00567
0 KILLED/train/KILLED_00575
0 KILLED/train/KILLED_00593
0 KILLED/train/KILLED_00602
0 KILLED/train/KILLED_00604
0 KILLED/train/KILLED_00626
0 KILLED/train/KILLED_00638
0 KILLED/train/KILLED_00655
0 KILLED/train/KILLED_00656
0 KILLED/train/KILLED_00695
0 KILLED/train/KILLED_00717
0 KILLED/train/KILLED_00728
0 KILLED/train/KILLED_00745
0 KILLED/train/KILLED_00756
0 KILLED/train/KILLED_00765
0 KILLED/train/KILLED_00863
0 KILLED/train/KILLED_00866
0 KILLED/train/KILLED_00888
0 KILLED/train/KILLED_00892
0 KILLED/train/KILLED_00927
0 KILLED/train/KILLED_00940
0 KILLED/train/KILLED_00955
0 KILLED/train/KILLED_00956
0 KILLED/train/KILLED_00960
0 KILLED/train/KILLED_00992
0 KILLED/train/KILLED_00993
0 KILLED/val/KILLED_00038
0 KILLED/val/KILLED_00043
0 KNOWN/test/KNOWN_00025
0 KNOWN/train/KNOWN_00005
0 KNOWN/train/KNOWN_00022
0 KNOWN/train/KNOWN_00045
0 KNOWN/train/KNOWN_00078
0 KNOWN/train/KNOWN_00127
0 KNOWN/train/KNOWN_00131
0 KNOWN/train/KNOWN_00158
0 KNOWN/train/KNOWN_00164
0 KNOWN/train/KNOWN_00166
0 KNOWN/train/KNOWN_00188
0 KNOWN/train/KNOWN_00209
0 KNOWN/train/KNOWN_00240
0 KNOWN/train/KNOWN_00260
0 KNOWN/train/KNOWN_00261
0 KNOWN/train/KNOWN_00262
0 KNOWN/train/KNOWN_00273
0 KNOWN/train/KNOWN_00288
0 KNOWN/train/KNOWN_00297
0 KNOWN/train/KNOWN_00302
0 KNOWN/train/KNOWN_00306
0 KNOWN/train/KNOWN_00315
0 KNOWN/train/KNOWN_00352
0 KNOWN/train/KNOWN_00369
0 KNOWN/train/KNOWN_00380
0 KNOWN/train/KNOWN_00396
0 KNOWN/train/KNOWN_00401
0 KNOWN/train/KNOWN_00435
0 KNOWN/train/KNOWN_00436
0 KNOWN/train/KNOWN_00439
0 KNOWN/train/KNOWN_00461
0 KNOWN/train/KNOWN_00473
0 KNOWN/train/KNOWN_00541
0 KNOWN/train/KNOWN_00560
0 KNOWN/train/KNOWN_00592
0 KNOWN/train/KNOWN_00596
0 KNOWN/train/KNOWN_00597
0 KNOWN/train/KNOWN_00603
0 KNOWN/train/KNOWN_00605
0 KNOWN/train/KNOWN_00616
0 KNOWN/train/KNOWN_00619
0 KNOWN/train/KNOWN_00622
0 KNOWN/train/KNOWN_00638
0 KNOWN/train/KNOWN_00650
0 KNOWN/train/KNOWN_00654
0 KNOWN/train/KNOWN_00690
0 KNOWN/train/KNOWN_00693
0 KNOWN/train/KNOWN_00720
0 KNOWN/train/KNOWN_00732
0 KNOWN/train/KNOWN_00736
0 KNOWN/train/KNOWN_00757
0 KNOWN/train/KNOWN_00767
0 KNOWN/train/KNOWN_00770
0 KNOWN/train/KNOWN_00786
0 KNOWN/train/KNOWN_00822
0 KNOWN/train/KNOWN_00868
0 KNOWN/train/KNOWN_00886
0 KNOWN/train/KNOWN_00898
0 KNOWN/train/KNOWN_00958
0 KNOWN/train/KNOWN_00973
0 KNOWN/val/KNOWN_00013
0 KNOWN/val/KNOWN_00015
0 KNOWN/val/KNOWN_00028
0 KNOWN/val/KNOWN_00048
0 LABOUR/test/LABOUR_00006
0 LABOUR/train/LABOUR_00007
0 LABOUR/train/LABOUR_00108
0 LABOUR/train/LABOUR_00133
0 LABOUR/train/LABOUR_00138
0 LABOUR/train/LABOUR_00139
0 LABOUR/train/LABOUR_00141
0 LABOUR/train/LABOUR_00153
0 LABOUR/train/LABOUR_00200
0 LABOUR/train/LABOUR_00207
0 LABOUR/train/LABOUR_00221
0 LABOUR/train/LABOUR_00232
0 LABOUR/train/LABOUR_00258
0 LABOUR/train/LABOUR_00261
0 LABOUR/train/LABOUR_00269
0 LABOUR/train/LABOUR_00281
0 LABOUR/train/LABOUR_00302
0 LABOUR/train/LABOUR_00313
0 LABOUR/train/LABOUR_00315
0 LABOUR/train/LABOUR_00342
0 LABOUR/train/LABOUR_00357
0 LABOUR/train/LABOUR_00361
0 LABOUR/train/LABOUR_00377
0 LABOUR/train/LABOUR_00391
0 LABOUR/train/LABOUR_00408
0 LABOUR/train/LABOUR_00442
0 LABOUR/train/LABOUR_00454
0 LABOUR/train/LABOUR_00474
0 LABOUR/train/LABOUR_00490
0 LABOUR/train/LABOUR_00528
0 LABOUR/train/LABOUR_00532
0 LABOUR/train/LABOUR_00554
0 LABOUR/train/LABOUR_00628
0 LABOUR/train/LABOUR_00640
0 LABOUR/train/LABOUR_00657
0 LABOUR/train/LABOUR_00682
0 LABOUR/train/LABOUR_00719
0 LABOUR/train/LABOUR_00727
0 LABOUR/train/LABOUR_00736
0 LABOUR/train/LABOUR_00737
0 LABOUR/train/LABOUR_00773
0 LABOUR/train/LABOUR_00795
0 LABOUR/train/LABOUR_00806
0 LABOUR/train/LABOUR_00827
0 LABOUR/train/LABOUR_00836
0 LABOUR/train/LABOUR_00842
0 LABOUR/train/LABOUR_00856
0 LABOUR/train/LABOUR_00918
0 LABOUR/train/LABOUR_00921
0 LABOUR/train/LABOUR_00955
0 LABOUR/train/LABOUR_00956
0 LABOUR/train/LABOUR_00966
0 LABOUR/train/LABOUR_00970
0 LABOUR/train/LABOUR_00972
0 LABOUR/train/LABOUR_00987
0 LABOUR/val/LABOUR_00014
0 LARGE/train/LARGE_00107
0 LARGE/train/LARGE_00262
0 LARGE/train/LARGE_00306
0 LARGE/train/LARGE_00333
0 LARGE/train/LARGE_00355
0 LARGE/train/LARGE_00370
0 LARGE/train/LARGE_00520
0 LARGE/train/LARGE_00551
0 LARGE/train/LARGE_00573
0 LARGE/train/LARGE_00606
0 LARGE/train/LARGE_00663
0 LARGE/train/LARGE_00764
0 LARGE/train/LARGE_00822
0 LARGE/train/LARGE_00963
0 LARGE/train/LARGE_00989
0 LARGE/train/LARGE_00994
0 LATER/train/LATER_00001
0 LATER/train/LATER_00004
0 LATER/train/LATER_00023
0 LATER/train/LATER_00030
0 LATER/train/LATER_00040
0 LATER/train/LATER_00086
0 LATER/train/LATER_00099
0 LATER/train/LATER_00157
0 LATER/train/LATER_00282
0 LATER/train/LATER_00285
0 LATER/train/LATER_00287
0 LATER/train/LATER_00359
0 LATER/train/LATER_00401
0 LATER/train/LATER_00409
0 LATER/train/LATER_00457
0 LATER/train/LATER_00459
0 LATER/train/LATER_00580
0 LATER/train/LATER_00615
0 LATER/train/LATER_00794
0 LATER/train/LATER_00846
0 LATER/train/LATER_00864
0 LATER/train/LATER_00891
0 LATER/train/LATER_00933
0 LATER/train/LATER_00962
0 LATER/train/LATER_00993
0 LATER/val/LATER_00020
0 LATER/val/LATER_00027
0 LATEST/test/LATEST_00001
0 LATEST/test/LATEST_00012
0 LATEST/test/LATEST_00013
0 LATEST/test/LATEST_00019
0 LATEST/test/LATEST_00024
0 LATEST/test/LATEST_00031
0 LATEST/train/LATEST_00013
0 LATEST/train/LATEST_00015
0 LATEST/train/LATEST_00033
0 LATEST/train/LATEST_00036
0 LATEST/train/LATEST_00038
0 LATEST/train/LATEST_00078
0 LATEST/train/LATEST_00079
0 LATEST/train/LATEST_00080
0 LATEST/train/LATEST_00081
0 LATEST/train/LATEST_00082
0 LATEST/train/LATEST_00090
0 LATEST/train/LATEST_00092
0 LATEST/train/LATEST_00095
0 LATEST/train/LATEST_00112
0 LATEST/train/LATEST_00116
0 LATEST/train/LATEST_00126
0 LATEST/train/LATEST_00153
0 LATEST/train/LATEST_00159
0 LATEST/train/LATEST_00162
0 LATEST/train/LATEST_00163
0 LATEST/train/LATEST_00171
0 LATEST/train/LATEST_00177
0 LATEST/train/LATEST_00180
0 LATEST/train/LATEST_00183
0 LATEST/train/LATEST_00187
0 LATEST/train/LATEST_00192
0 LATEST/train/LATEST_00197
0 LATEST/train/LATEST_00204
0 LATEST/train/LATEST_00207
0 LATEST/train/LATEST_00220
0 LATEST/train/LATEST_00232
0 LATEST/train/LATEST_00246
0 LATEST/train/LATEST_00256
0 LATEST/train/LATEST_00262
0 LATEST/train/LATEST_00266
0 LATEST/train/LATEST_00272
0 LATEST/train/LATEST_00275
0 LATEST/train/LATEST_00279
0 LATEST/train/LATEST_00282
0 LATEST/train/LATEST_00286
0 LATEST/train/LATEST_00287
0 LATEST/train/LATEST_00288
0 LATEST/train/LATEST_00292
0 LATEST/train/LATEST_00297
0 LATEST/train/LATEST_00302
0 LATEST/train/LATEST_00318
0 LATEST/train/LATEST_00325
0 LATEST/train/LATEST_00326
0 LATEST/train/LATEST_00332
0 LATEST/train/LATEST_00336
0 LATEST/train/LATEST_00338
0 LATEST/train/LATEST_00347
0 LATEST/train/LATEST_00349
0 LATEST/train/LATEST_00361
0 LATEST/train/LATEST_00383
0 LATEST/train/LATEST_00384
0 LATEST/train/LATEST_00385
0 LATEST/train/LATEST_00392
0 LATEST/train/LATEST_00398
0 LATEST/train/LATEST_00402
0 LATEST/train/LATEST_00406
0 LATEST/train/LATEST_00409
0 LATEST/train/LATEST_00419
0 LATEST/train/LATEST_00422
0 LATEST/train/LATEST_00430
0 LATEST/train/LATEST_00433
0 LATEST/train/LATEST_00441
0 LATEST/train/LATEST_00442
0 LATEST/train/LATEST_00449
0 LATEST/train/LATEST_00451
0 LATEST/train/LATEST_00453
0 LATEST/train/LATEST_00468
0 LATEST/train/LATEST_00473
0 LATEST/train/LATEST_00504
0 LATEST/train/LATEST_00508
0 LATEST/train/LATEST_00518
0 LATEST/train/LATEST_00522
0 LATEST/train/LATEST_00541
0 LATEST/train/LATEST_00545
0 LATEST/train/LATEST_00548
0 LATEST/train/LATEST_00552
0 LATEST/train/LATEST_00554
0 LATEST/train/LATEST_00556
0 LATEST/train/LATEST_00559
0 LATEST/train/LATEST_00597
0 LATEST/train/LATEST_00615
0 LATEST/train/LATEST_00617
0 LATEST/train/LATEST_00618
0 LATEST/train/LATEST_00621
0 LATEST/train/LATEST_00636
0 LATEST/train/LATEST_00640
0 LATEST/train/LATEST_00648
0 LATEST/train/LATEST_00653
0 LATEST/train/LATEST_00661
0 LATEST/train/LATEST_00663
0 LATEST/train/LATEST_00682
0 LATEST/train/LATEST_00691
0 LATEST/train/LATEST_00699
0 LATEST/train/LATEST_00709
0 LATEST/train/LATEST_00710
0 LATEST/train/LATEST_00714
0 LATEST/train/LATEST_00718
0 LATEST/train/LATEST_00721
0 LATEST/train/LATEST_00727
0 LATEST/train/LATEST_00731
0 LATEST/train/LATEST_00733
0 LATEST/train/LATEST_00735
0 LATEST/train/LATEST_00740
0 LATEST/train/LATEST_00741
0 LATEST/train/LATEST_00749
0 LATEST/train/LATEST_00758
0 LATEST/train/LATEST_00765
0 LATEST/train/LATEST_00768
0 LATEST/train/LATEST_00771
0 LATEST/train/LATEST_00780
0 LATEST/train/LATEST_00791
0 LATEST/train/LATEST_00794
0 LATEST/train/LATEST_00795
0 LATEST/train/LATEST_00803
0 LATEST/train/LATEST_00811
0 LATEST/train/LATEST_00819
0 LATEST/train/LATEST_00821
0 LATEST/train/LATEST_00825
0 LATEST/train/LATEST_00829
0 LATEST/train/LATEST_00830
0 LATEST/train/LATEST_00832
0 LATEST/train/LATEST_00834
0 LATEST/train/LATEST_00838
0 LATEST/train/LATEST_00841
0 LATEST/train/LATEST_00845
0 LATEST/train/LATEST_00860
0 LATEST/train/LATEST_00871
0 LATEST/train/LATEST_00872
0 LATEST/train/LATEST_00875
0 LATEST/train/LATEST_00879
0 LATEST/train/LATEST_00881
0 LATEST/train/LATEST_00882
0 LATEST/train/LATEST_00883
0 LATEST/train/LATEST_00892
0 LATEST/train/LATEST_00894
0 LATEST/train/LATEST_00906
0 LATEST/train/LATEST_00910
0 LATEST/train/LATEST_00917
0 LATEST/train/LATEST_00919
0 LATEST/train/LATEST_00923
0 LATEST/train/LATEST_00925
0 LATEST/train/LATEST_00927
0 LATEST/train/LATEST_00933
0 LATEST/train/LATEST_00936
0 LATEST/train/LATEST_00941
0 LATEST/train/LATEST_00946
0 LATEST/train/LATEST_00957
0 LATEST/train/LATEST_00976
0 LATEST/train/LATEST_00979
0 LATEST/train/LATEST_00983
0 LATEST/train/LATEST_00992
0 LATEST/train/LATEST_00997
0 LATEST/val/LATEST_00015
0 LATEST/val/LATEST_00016
0 LATEST/val/LATEST_00020
0 LATEST/val/LATEST_00039
0 LEADERSHIP/train/LEADERSHIP_00059
0 LEADERSHIP/train/LEADERSHIP_00066
0 LEADERSHIP/train/LEADERSHIP_00178
0 LEADERSHIP/train/LEADERSHIP_00195
0 LEADERSHIP/train/LEADERSHIP_00206
0 LEADERSHIP/train/LEADERSHIP_00224
0 LEADERSHIP/train/LEADERSHIP_00247
0 LEADERSHIP/train/LEADERSHIP_00248
0 LEADERSHIP/train/LEADERSHIP_00263
0 LEADERSHIP/train/LEADERSHIP_00274
0 LEADERSHIP/train/LEADERSHIP_00288
0 LEADERSHIP/train/LEADERSHIP_00297
0 LEADERSHIP/train/LEADERSHIP_00406
0 LEADERSHIP/train/LEADERSHIP_00418
0 LEADERSHIP/train/LEADERSHIP_00461
0 LEADERSHIP/train/LEADERSHIP_00469
0 LEADERSHIP/train/LEADERSHIP_00489
0 LEADERSHIP/train/LEADERSHIP_00490
0 LEADERSHIP/train/LEADERSHIP_00520
0 LEADERSHIP/train/LEADERSHIP_00565
0 LEADERSHIP/train/LEADERSHIP_00582
0 LEADERSHIP/train/LEADERSHIP_00627
0 LEADERSHIP/train/LEADERSHIP_00634
0 LEADERSHIP/train/LEADERSHIP_00662
0 LEADERSHIP/train/LEADERSHIP_00703
0 LEADERSHIP/train/LEADERSHIP_00745
0 LEADERSHIP/train/LEADERSHIP_00764
0 LEADERSHIP/train/LEADERSHIP_00789
0 LEADERSHIP/val/LEADERSHIP_00033
0 LEADERSHIP/val/LEADERSHIP_00035
0 LEADERS/test/LEADERS_00019
0 LEADERS/train/LEADERS_00001
0 LEADERS/train/LEADERS_00005
0 LEADERS/train/LEADERS_00013
0 LEADERS/train/LEADERS_00061
0 LEADERS/train/LEADERS_00094
0 LEADERS/train/LEADERS_00104
0 LEADERS/train/LEADERS_00144
0 LEADERS/train/LEADERS_00149
0 LEADERS/train/LEADERS_00158
0 LEADERS/train/LEADERS_00159
0 LEADERS/train/LEADERS_00161
0 LEADERS/train/LEADERS_00184
0 LEADERS/train/LEADERS_00189
0 LEADERS/train/LEADERS_00195
0 LEADERS/train/LEADERS_00213
0 LEADERS/train/LEADERS_00215
0 LEADERS/train/LEADERS_00231
0 LEADERS/train/LEADERS_00242
0 LEADERS/train/LEADERS_00243
0 LEADERS/train/LEADERS_00266
0 LEADERS/train/LEADERS_00275
0 LEADERS/train/LEADERS_00299
0 LEADERS/train/LEADERS_00300
0 LEADERS/train/LEADERS_00345
0 LEADERS/train/LEADERS_00353
0 LEADERS/train/LEADERS_00357
0 LEADERS/train/LEADERS_00362
0 LEADERS/train/LEADERS_00428
0 LEADERS/train/LEADERS_00440
0 LEADERS/train/LEADERS_00450
0 LEADERS/train/LEADERS_00455
0 LEADERS/train/LEADERS_00496
0 LEADERS/train/LEADERS_00508
0 LEADERS/train/LEADERS_00518
0 LEADERS/train/LEADERS_00519
0 LEADERS/train/LEADERS_00538
0 LEADERS/train/LEADERS_00545
0 LEADERS/train/LEADERS_00631
0 LEADERS/train/LEADERS_00688
0 LEADERS/train/LEADERS_00689
0 LEADERS/train/LEADERS_00696
0 LEADERS/train/LEADERS_00697
0 LEADERS/train/LEADERS_00715
0 LEADERS/train/LEADERS_00716
0 LEADERS/train/LEADERS_00721
0 LEADERS/train/LEADERS_00790
0 LEADERS/train/LEADERS_00841
0 LEADERS/train/LEADERS_00852
0 LEADERS/train/LEADERS_00904
0 LEADERS/train/LEADERS_00906
0 LEADERS/train/LEADERS_00922
0 LEADERS/train/LEADERS_00952
0 LEADERS/train/LEADERS_00976
0 LEADERS/train/LEADERS_00985
0 LEADERS/val/LEADERS_00026
0 LEADERS/val/LEADERS_00040
0 LEADERS/val/LEADERS_00047
0 LEADER/test/LEADER_00016
0 LEADER/test/LEADER_00036
0 LEADER/test/LEADER_00039
0 LEADER/test/LEADER_00041
0 LEADER/train/LEADER_00017
0 LEADER/train/LEADER_00023
0 LEADER/train/LEADER_00034
0 LEADER/train/LEADER_00043
0 LEADER/train/LEADER_00059
0 LEADER/train/LEADER_00067
0 LEADER/train/LEADER_00068
0 LEADER/train/LEADER_00111
0 LEADER/train/LEADER_00114
0 LEADER/train/LEADER_00124
0 LEADER/train/LEADER_00137
0 LEADER/train/LEADER_00147
0 LEADER/train/LEADER_00151
0 LEADER/train/LEADER_00195
0 LEADER/train/LEADER_00210
0 LEADER/train/LEADER_00211
0 LEADER/train/LEADER_00213
0 LEADER/train/LEADER_00225
0 LEADER/train/LEADER_00241
0 LEADER/train/LEADER_00252
0 LEADER/train/LEADER_00258
0 LEADER/train/LEADER_00266
0 LEADER/train/LEADER_00311
0 LEADER/train/LEADER_00314
0 LEADER/train/LEADER_00317
0 LEADER/train/LEADER_00344
0 LEADER/train/LEADER_00353
0 LEADER/train/LEADER_00366
0 LEADER/train/LEADER_00371
0 LEADER/train/LEADER_00376
0 LEADER/train/LEADER_00382
0 LEADER/train/LEADER_00396
0 LEADER/train/LEADER_00401
0 LEADER/train/LEADER_00427
0 LEADER/train/LEADER_00429
0 LEADER/train/LEADER_00465
0 LEADER/train/LEADER_00471
0 LEADER/train/LEADER_00479
0 LEADER/train/LEADER_00493
0 LEADER/train/LEADER_00499
0 LEADER/train/LEADER_00525
0 LEADER/train/LEADER_00532
0 LEADER/train/LEADER_00536
0 LEADER/train/LEADER_00545
0 LEADER/train/LEADER_00547
0 LEADER/train/LEADER_00554
0 LEADER/train/LEADER_00566
0 LEADER/train/LEADER_00601
0 LEADER/train/LEADER_00611
0 LEADER/train/LEADER_00627
0 LEADER/train/LEADER_00652
0 LEADER/train/LEADER_00655
0 LEADER/train/LEADER_00679
0 LEADER/train/LEADER_00680
0 LEADER/train/LEADER_00687
0 LEADER/train/LEADER_00689
0 LEADER/train/LEADER_00725
0 LEADER/train/LEADER_00726
0 LEADER/train/LEADER_00737
0 LEADER/train/LEADER_00740
0 LEADER/train/LEADER_00757
0 LEADER/train/LEADER_00815
0 LEADER/train/LEADER_00836
0 LEADER/train/LEADER_00848
0 LEADER/train/LEADER_00858
0 LEADER/train/LEADER_00875
0 LEADER/train/LEADER_00906
0 LEADER/train/LEADER_00924
0 LEADER/train/LEADER_00927
0 LEADER/train/LEADER_00928
0 LEADER/train/LEADER_00943
0 LEADER/train/LEADER_00947
0 LEADER/train/LEADER_00976
0 LEADER/train/LEADER_00987
0 LEADER/val/LEADER_00031
0 LEADER/val/LEADER_00050
0 LEAST/test/LEAST_00010
0 LEAST/test/LEAST_00041
0 LEAST/train/LEAST_00022
0 LEAST/train/LEAST_00029
0 LEAST/train/LEAST_00058
0 LEAST/train/LEAST_00065
0 LEAST/train/LEAST_00071
0 LEAST/train/LEAST_00084
0 LEAST/train/LEAST_00128
0 LEAST/train/LEAST_00145
0 LEAST/train/LEAST_00175
0 LEAST/train/LEAST_00195
0 LEAST/train/LEAST_00223
0 LEAST/train/LEAST_00228
0 LEAST/train/LEAST_00232
0 LEAST/train/LEAST_00233
0 LEAST/train/LEAST_00261
0 LEAST/train/LEAST_00265
0 LEAST/train/LEAST_00291
0 LEAST/train/LEAST_00293
0 LEAST/train/LEAST_00305
0 LEAST/train/LEAST_00342
0 LEAST/train/LEAST_00352
0 LEAST/train/LEAST_00404
0 LEAST/train/LEAST_00473
0 LEAST/train/LEAST_00499
0 LEAST/train/LEAST_00536
0 LEAST/train/LEAST_00551
0 LEAST/train/LEAST_00557
0 LEAST/train/LEAST_00578
0 LEAST/train/LEAST_00604
0 LEAST/train/LEAST_00692
0 LEAST/train/LEAST_00717
0 LEAST/train/LEAST_00741
0 LEAST/train/LEAST_00785
0 LEAST/train/LEAST_00788
0 LEAST/train/LEAST_00807
0 LEAST/train/LEAST_00813
0 LEAST/train/LEAST_00835
0 LEAST/train/LEAST_00838
0 LEAST/train/LEAST_00867
0 LEAST/train/LEAST_00916
0 LEAST/train/LEAST_00946
0 LEAST/train/LEAST_00959
0 LEAST/val/LEAST_00023
0 LEAVE/test/LEAVE_00035
0 LEAVE/test/LEAVE_00046
0 LEAVE/train/LEAVE_00072
0 LEAVE/train/LEAVE_00088
0 LEAVE/train/LEAVE_00115
0 LEAVE/train/LEAVE_00169
0 LEAVE/train/LEAVE_00180
0 LEAVE/train/LEAVE_00235
0 LEAVE/train/LEAVE_00244
0 LEAVE/train/LEAVE_00268
0 LEAVE/train/LEAVE_00275
0 LEAVE/train/LEAVE_00330
0 LEAVE/train/LEAVE_00430
0 LEAVE/train/LEAVE_00448
0 LEAVE/train/LEAVE_00459
0 LEAVE/train/LEAVE_00464
0 LEAVE/train/LEAVE_00519
0 LEAVE/train/LEAVE_00521
0 LEAVE/train/LEAVE_00630
0 LEAVE/train/LEAVE_00764
0 LEAVE/train/LEAVE_00858
0 LEAVE/train/LEAVE_00866
0 LEAVE/train/LEAVE_00878
0 LEAVE/train/LEAVE_00899
0 LEAVE/train/LEAVE_00906
0 LEAVE/train/LEAVE_00911
0 LEAVE/train/LEAVE_00949
0 LEAVE/train/LEAVE_00960
0 LEAVE/train/LEAVE_00971
0 LEAVE/val/LEAVE_00011
0 LEAVE/val/LEAVE_00029
0 LEAVE/val/LEAVE_00047
0 LEGAL/train/LEGAL_00005
0 LEGAL/train/LEGAL_00019
0 LEGAL/train/LEGAL_00022
0 LEGAL/train/LEGAL_00045
0 LEGAL/train/LEGAL_00047
0 LEGAL/train/LEGAL_00050
0 LEGAL/train/LEGAL_00104
0 LEGAL/train/LEGAL_00117
0 LEGAL/train/LEGAL_00127
0 LEGAL/train/LEGAL_00185
0 LEGAL/train/LEGAL_00195
0 LEGAL/train/LEGAL_00208
0 LEGAL/train/LEGAL_00211
0 LEGAL/train/LEGAL_00220
0 LEGAL/train/LEGAL_00324
0 LEGAL/train/LEGAL_00340
0 LEGAL/train/LEGAL_00376
0 LEGAL/train/LEGAL_00455
0 LEGAL/train/LEGAL_00497
0 LEGAL/train/LEGAL_00570
0 LEGAL/train/LEGAL_00582
0 LEGAL/train/LEGAL_00614
0 LEGAL/train/LEGAL_00632
0 LEGAL/train/LEGAL_00656
0 LEGAL/train/LEGAL_00704
0 LEGAL/train/LEGAL_00712
0 LEGAL/train/LEGAL_00731
0 LEGAL/train/LEGAL_00751
0 LEGAL/train/LEGAL_00756
0 LEGAL/train/LEGAL_00760
0 LEGAL/train/LEGAL_00789
0 LEGAL/train/LEGAL_00797
0 LEGAL/train/LEGAL_00827
0 LEGAL/train/LEGAL_00834
0 LEGAL/train/LEGAL_00838
0 LEGAL/train/LEGAL_00900
0 LEVELS/test/LEVELS_00026
0 LEVELS/train/LEVELS_00030
0 LEVELS/train/LEVELS_00051
0 LEVELS/train/LEVELS_00055
0 LEVELS/train/LEVELS_00200
0 LEVELS/train/LEVELS_00201
0 LEVELS/train/LEVELS_00222
0 LEVELS/train/LEVELS_00223
0 LEVELS/train/LEVELS_00275
0 LEVELS/train/LEVELS_00307
0 LEVELS/train/LEVELS_00323
0 LEVELS/train/LEVELS_00346
0 LEVELS/train/LEVELS_00372
0 LEVELS/train/LEVELS_00384
0 LEVELS/train/LEVELS_00409
0 LEVELS/train/LEVELS_00413
0 LEVELS/train/LEVELS_00420
0 LEVELS/train/LEVELS_00455
0 LEVELS/train/LEVELS_00477
0 LEVELS/train/LEVELS_00502
0 LEVELS/train/LEVELS_00503
0 LEVELS/train/LEVELS_00516
0 LEVELS/train/LEVELS_00517
0 LEVELS/train/LEVELS_00519
0 LEVELS/train/LEVELS_00564
0 LEVELS/train/LEVELS_00635
0 LEVELS/train/LEVELS_00658
0 LEVELS/train/LEVELS_00688
0 LEVELS/train/LEVELS_00692
0 LEVELS/train/LEVELS_00717
0 LEVELS/train/LEVELS_00731
0 LEVELS/train/LEVELS_00745
0 LEVELS/train/LEVELS_00746
0 LEVELS/train/LEVELS_00756
0 LEVELS/train/LEVELS_00758
0 LEVELS/train/LEVELS_00775
0 LEVELS/train/LEVELS_00791
0 LEVELS/train/LEVELS_00821
0 LEVELS/train/LEVELS_00848
0 LEVELS/train/LEVELS_00870
0 LEVELS/train/LEVELS_00897
0 LEVELS/train/LEVELS_00928
0 LEVELS/train/LEVELS_00982
0 LEVELS/train/LEVELS_00993
0 LEVELS/val/LEVELS_00013
0 LEVELS/val/LEVELS_00027
0 LEVELS/val/LEVELS_00036
0 LEVEL/test/LEVEL_00041
0 LEVEL/train/LEVEL_00009
0 LEVEL/train/LEVEL_00013
0 LEVEL/train/LEVEL_00014
0 LEVEL/train/LEVEL_00066
0 LEVEL/train/LEVEL_00099
0 LEVEL/train/LEVEL_00107
0 LEVEL/train/LEVEL_00143
0 LEVEL/train/LEVEL_00178
0 LEVEL/train/LEVEL_00191
0 LEVEL/train/LEVEL_00220
0 LEVEL/train/LEVEL_00267
0 LEVEL/train/LEVEL_00272
0 LEVEL/train/LEVEL_00290
0 LEVEL/train/LEVEL_00294
0 LEVEL/train/LEVEL_00397
0 LEVEL/train/LEVEL_00451
0 LEVEL/train/LEVEL_00464
0 LEVEL/train/LEVEL_00471
0 LEVEL/train/LEVEL_00604
0 LEVEL/train/LEVEL_00633
0 LEVEL/train/LEVEL_00673
0 LEVEL/train/LEVEL_00712
0 LEVEL/train/LEVEL_00735
0 LEVEL/train/LEVEL_00759
0 LEVEL/train/LEVEL_00823
0 LEVEL/train/LEVEL_00830
0 LEVEL/train/LEVEL_00839
0 LEVEL/train/LEVEL_00863
0 LEVEL/train/LEVEL_00904
0 LEVEL/train/LEVEL_00910
0 LEVEL/train/LEVEL_00919
0 LEVEL/train/LEVEL_00934
0 LEVEL/train/LEVEL_00940
0 LEVEL/train/LEVEL_00944
0 LEVEL/train/LEVEL_00997
0 LEVEL/val/LEVEL_00012
0 LEVEL/val/LEVEL_00029
0 LIKELY/train/LIKELY_00007
0 LIKELY/train/LIKELY_00061
0 LIKELY/train/LIKELY_00077
0 LIKELY/train/LIKELY_00084
0 LIKELY/train/LIKELY_00098
0 LIKELY/train/LIKELY_00101
0 LIKELY/train/LIKELY_00104
0 LIKELY/train/LIKELY_00119
0 LIKELY/train/LIKELY_00162
0 LIKELY/train/LIKELY_00163
0 LIKELY/train/LIKELY_00194
0 LIKELY/train/LIKELY_00271
0 LIKELY/train/LIKELY_00285
0 LIKELY/train/LIKELY_00302
0 LIKELY/train/LIKELY_00310
0 LIKELY/train/LIKELY_00323
0 LIKELY/train/LIKELY_00435
0 LIKELY/train/LIKELY_00440
0 LIKELY/train/LIKELY_00452
0 LIKELY/train/LIKELY_00474
0 LIKELY/train/LIKELY_00511
0 LIKELY/train/LIKELY_00522
0 LIKELY/train/LIKELY_00537
0 LIKELY/train/LIKELY_00556
0 LIKELY/train/LIKELY_00564
0 LIKELY/train/LIKELY_00578
0 LIKELY/train/LIKELY_00608
0 LIKELY/train/LIKELY_00629
0 LIKELY/train/LIKELY_00666
0 LIKELY/train/LIKELY_00702
0 LIKELY/train/LIKELY_00706
0 LIKELY/train/LIKELY_00727
0 LIKELY/train/LIKELY_00733
0 LIKELY/train/LIKELY_00774
0 LIKELY/train/LIKELY_00775
0 LIKELY/train/LIKELY_00795
0 LIKELY/train/LIKELY_00828
0 LIKELY/train/LIKELY_00860
0 LIKELY/train/LIKELY_00894
0 LIKELY/train/LIKELY_00903
0 LIKELY/train/LIKELY_00944
0 LIKELY/train/LIKELY_00975
0 LIKELY/train/LIKELY_00976
0 LIKELY/train/LIKELY_00980
0 LIKELY/val/LIKELY_00032
0 LIKELY/val/LIKELY_00035
0 LIKELY/val/LIKELY_00049
0 LIKELY/val/LIKELY_00050
0 LITTLE/train/LITTLE_00041
0 LITTLE/train/LITTLE_00046
0 LITTLE/train/LITTLE_00049
0 LITTLE/train/LITTLE_00051
0 LITTLE/train/LITTLE_00210
0 LITTLE/train/LITTLE_00212
0 LITTLE/train/LITTLE_00218
0 LITTLE/train/LITTLE_00243
0 LITTLE/train/LITTLE_00369
0 LITTLE/train/LITTLE_00396
0 LITTLE/train/LITTLE_00419
0 LITTLE/train/LITTLE_00429
0 LITTLE/train/LITTLE_00431
0 LITTLE/train/LITTLE_00462
0 LITTLE/train/LITTLE_00539
0 LITTLE/train/LITTLE_00552
0 LITTLE/train/LITTLE_00570
0 LITTLE/train/LITTLE_00637
0 LITTLE/train/LITTLE_00696
0 LITTLE/train/LITTLE_00717
0 LITTLE/train/LITTLE_00810
0 LITTLE/train/LITTLE_00834
0 LITTLE/train/LITTLE_00902
0 LITTLE/train/LITTLE_00916
0 LITTLE/train/LITTLE_00979
0 LITTLE/train/LITTLE_00993
0 LIVES/test/LIVES_00025
0 LIVES/test/LIVES_00039
0 LIVES/train/LIVES_00005
0 LIVES/train/LIVES_00013
0 LIVES/train/LIVES_00021
0 LIVES/train/LIVES_00024
0 LIVES/train/LIVES_00033
0 LIVES/train/LIVES_00078
0 LIVES/train/LIVES_00104
0 LIVES/train/LIVES_00112
0 LIVES/train/LIVES_00126
0 LIVES/train/LIVES_00182
0 LIVES/train/LIVES_00199
0 LIVES/train/LIVES_00228
0 LIVES/train/LIVES_00237
0 LIVES/train/LIVES_00241
0 LIVES/train/LIVES_00272
0 LIVES/train/LIVES_00276
0 LIVES/train/LIVES_00326
0 LIVES/train/LIVES_00329
0 LIVES/train/LIVES_00331
0 LIVES/train/LIVES_00334
0 LIVES/train/LIVES_00335
0 LIVES/train/LIVES_00343
0 LIVES/train/LIVES_00373
0 LIVES/train/LIVES_00376
0 LIVES/train/LIVES_00390
0 LIVES/train/LIVES_00401
0 LIVES/train/LIVES_00413
0 LIVES/train/LIVES_00426
0 LIVES/train/LIVES_00431
0 LIVES/train/LIVES_00435
0 LIVES/train/LIVES_00489
0 LIVES/train/LIVES_00500
0 LIVES/train/LIVES_00506
0 LIVES/train/LIVES_00529
0 LIVES/train/LIVES_00556
0 LIVES/train/LIVES_00575
0 LIVES/train/LIVES_00598
0 LIVES/train/LIVES_00639
0 LIVES/train/LIVES_00646
0 LIVES/train/LIVES_00648
0 LIVES/train/LIVES_00664
0 LIVES/train/LIVES_00665
0 LIVES/train/LIVES_00669
0 LIVES/train/LIVES_00672
0 LIVES/train/LIVES_00676
0 LIVES/train/LIVES_00713
0 LIVES/train/LIVES_00754
0 LIVES/train/LIVES_00759
0 LIVES/train/LIVES_00763
0 LIVES/train/LIVES_00767
0 LIVES/train/LIVES_00768
0 LIVES/train/LIVES_00833
0 LIVES/train/LIVES_00843
0 LIVES/train/LIVES_00855
0 LIVES/train/LIVES_00871
0 LIVES/train/LIVES_00928
0 LIVES/train/LIVES_00953
0 LIVES/train/LIVES_00956
0 LIVES/val/LIVES_00003
0 LIVES/val/LIVES_00044
0 LIVES/val/LIVES_00050
0 LIVING/train/LIVING_00005
0 LIVING/train/LIVING_00039
0 LIVING/train/LIVING_00047
0 LIVING/train/LIVING_00096
0 LIVING/train/LIVING_00114
0 LIVING/train/LIVING_00153
0 LIVING/train/LIVING_00198
0 LIVING/train/LIVING_00201
0 LIVING/train/LIVING_00225
0 LIVING/train/LIVING_00251
0 LIVING/train/LIVING_00366
0 LIVING/train/LIVING_00428
0 LIVING/train/LIVING_00435
0 LIVING/train/LIVING_00443
0 LIVING/train/LIVING_00445
0 LIVING/train/LIVING_00468
0 LIVING/train/LIVING_00498
0 LIVING/train/LIVING_00499
0 LIVING/train/LIVING_00529
0 LIVING/train/LIVING_00582
0 LIVING/train/LIVING_00599
0 LIVING/train/LIVING_00695
0 LIVING/train/LIVING_00775
0 LIVING/train/LIVING_00792
0 LIVING/train/LIVING_00847
0 LIVING/train/LIVING_00864
0 LIVING/train/LIVING_00897
0 LIVING/train/LIVING_00964
0 LIVING/train/LIVING_00995
0 LOCAL/test/LOCAL_00017
0 LOCAL/test/LOCAL_00019
0 LOCAL/train/LOCAL_00018
0 LOCAL/train/LOCAL_00071
0 LOCAL/train/LOCAL_00076
0 LOCAL/train/LOCAL_00150
0 LOCAL/train/LOCAL_00155
0 LOCAL/train/LOCAL_00197
0 LOCAL/train/LOCAL_00297
0 LOCAL/train/LOCAL_00317
0 LOCAL/train/LOCAL_00341
0 LOCAL/train/LOCAL_00361
0 LOCAL/train/LOCAL_00452
0 LOCAL/train/LOCAL_00468
0 LOCAL/train/LOCAL_00474
0 LOCAL/train/LOCAL_00494
0 LOCAL/train/LOCAL_00537
0 LOCAL/train/LOCAL_00546
0 LOCAL/train/LOCAL_00560
0 LOCAL/train/LOCAL_00584
0 LOCAL/train/LOCAL_00591
0 LOCAL/train/LOCAL_00604
0 LOCAL/train/LOCAL_00627
0 LOCAL/train/LOCAL_00677
0 LOCAL/train/LOCAL_00685
0 LOCAL/train/LOCAL_00707
0 LOCAL/train/LOCAL_00744
0 LOCAL/train/LOCAL_00768
0 LOCAL/train/LOCAL_00769
0 LOCAL/train/LOCAL_00803
0 LOCAL/train/LOCAL_00810
0 LOCAL/train/LOCAL_00834
0 LOCAL/train/LOCAL_00879
0 LOCAL/train/LOCAL_00967
0 LOCAL/train/LOCAL_00989
0 LOCAL/val/LOCAL_00015
0 LONDON/test/LONDON_00001
0 LONDON/train/LONDON_00014
0 LONDON/train/LONDON_00076
0 LONDON/train/LONDON_00088
0 LONDON/train/LONDON_00095
0 LONDON/train/LONDON_00104
0 LONDON/train/LONDON_00111
0 LONDON/train/LONDON_00112
0 LONDON/train/LONDON_00116
0 LONDON/train/LONDON_00117
0 LONDON/train/LONDON_00152
0 LONDON/train/LONDON_00157
0 LONDON/train/LONDON_00160
0 LONDON/train/LONDON_00164
0 LONDON/train/LONDON_00177
0 LONDON/train/LONDON_00188
0 LONDON/train/LONDON_00192
0 LONDON/train/LONDON_00201
0 LONDON/train/LONDON_00215
0 LONDON/train/LONDON_00254
0 LONDON/train/LONDON_00258
0 LONDON/train/LONDON_00292
0 LONDON/train/LONDON_00305
0 LONDON/train/LONDON_00307
0 LONDON/train/LONDON_00334
0 LONDON/train/LONDON_00340
0 LONDON/train/LONDON_00347
0 LONDON/train/LONDON_00384
0 LONDON/train/LONDON_00436
0 LONDON/train/LONDON_00453
0 LONDON/train/LONDON_00480
0 LONDON/train/LONDON_00553
0 LONDON/train/LONDON_00558
0 LONDON/train/LONDON_00564
0 LONDON/train/LONDON_00577
0 LONDON/train/LONDON_00589
0 LONDON/train/LONDON_00613
0 LONDON/train/LONDON_00615
0 LONDON/train/LONDON_00621
0 LONDON/train/LONDON_00631
0 LONDON/train/LONDON_00647
0 LONDON/train/LONDON_00674
0 LONDON/train/LONDON_00676
0 LONDON/train/LONDON_00698
0 LONDON/train/LONDON_00705
0 LONDON/train/LONDON_00710
0 LONDON/train/LONDON_00760
0 LONDON/train/LONDON_00786
0 LONDON/train/LONDON_00833
0 LONDON/train/LONDON_00861
0 LONDON/train/LONDON_00866
0 LONDON/train/LONDON_00868
0 LONDON/train/LONDON_00871
0 LONDON/train/LONDON_00877
0 LONDON/train/LONDON_00886
0 LONDON/train/LONDON_00890
0 LONDON/train/LONDON_00898
0 LONDON/train/LONDON_00942
0 LONDON/train/LONDON_00945
0 LONDON/train/LONDON_00956
0 LONDON/train/LONDON_00961
0 LONDON/train/LONDON_00982
0 LONDON/train/LONDON_00998
0 LONDON/val/LONDON_00035
0 LONDON/val/LONDON_00040
0 LONDON/val/LONDON_00049
0 LONGER/test/LONGER_00045
0 LONGER/train/LONGER_00096
0 LONGER/train/LONGER_00158
0 LONGER/train/LONGER_00232
0 LONGER/train/LONGER_00239
0 LONGER/train/LONGER_00452
0 LONGER/train/LONGER_00473
0 LONGER/train/LONGER_00498
0 LONGER/train/LONGER_00555
0 LONGER/train/LONGER_00560
0 LONGER/train/LONGER_00627
0 LONGER/train/LONGER_00638
0 LONGER/train/LONGER_00659
0 LONGER/train/LONGER_00683
0 LONGER/train/LONGER_00763
0 LONGER/train/LONGER_00789
0 LONGER/train/LONGER_00820
0 LONGER/train/LONGER_00891
0 LONGER/train/LONGER_00927
0 LOOKING/test/LOOKING_00033
0 LOOKING/test/LOOKING_00035
0 LOOKING/train/LOOKING_00052
0 LOOKING/train/LOOKING_00129
0 LOOKING/train/LOOKING_00142
0 LOOKING/train/LOOKING_00158
0 LOOKING/train/LOOKING_00217
0 LOOKING/train/LOOKING_00274
0 LOOKING/train/LOOKING_00284
0 LOOKING/train/LOOKING_00292
0 LOOKING/train/LOOKING_00350
0 LOOKING/train/LOOKING_00399
0 LOOKING/train/LOOKING_00481
0 LOOKING/train/LOOKING_00521
0 LOOKING/train/LOOKING_00610
0 LOOKING/train/LOOKING_00634
0 LOOKING/train/LOOKING_00706
0 LOOKING/train/LOOKING_00714
0 LOOKING/train/LOOKING_00770
0 LOOKING/train/LOOKING_00800
0 LOOKING/train/LOOKING_00804
0 LOOKING/train/LOOKING_00837
0 LOOKING/train/LOOKING_00884
0 LOOKING/train/LOOKING_00918
0 LOOKING/train/LOOKING_00957
0 LOOKING/train/LOOKING_00987
0 MAJORITY/train/MAJORITY_00051
0 MAJORITY/train/MAJORITY_00063
0 MAJORITY/train/MAJORITY_00234
0 MAJORITY/train/MAJORITY_00271
0 MAJORITY/train/MAJORITY_00300
0 MAJORITY/train/MAJORITY_00341
0 MAJORITY/train/MAJORITY_00410
0 MAJORITY/train/MAJORITY_00465
0 MAJORITY/train/MAJORITY_00495
0 MAJORITY/train/MAJORITY_00504
0 MAJORITY/train/MAJORITY_00592
0 MAJORITY/train/MAJORITY_00630
0 MAJORITY/train/MAJORITY_00635
0 MAJORITY/train/MAJORITY_00667
0 MAJORITY/train/MAJORITY_00683
0 MAJORITY/train/MAJORITY_00688
0 MAJORITY/train/MAJORITY_00699
0 MAJORITY/train/MAJORITY_00734
0 MAJORITY/train/MAJORITY_00739
0 MAJORITY/train/MAJORITY_00760
0 MAJORITY/train/MAJORITY_00782
0 MAJORITY/train/MAJORITY_00784
0 MAJORITY/train/MAJORITY_00806
0 MAJORITY/train/MAJORITY_00880
0 MAJORITY/train/MAJORITY_00894
0 MAJORITY/train/MAJORITY_00905
0 MAJORITY/train/MAJORITY_00924
0 MAJORITY/train/MAJORITY_00969
0 MAJORITY/val/MAJORITY_00050
0 MAJOR/test/MAJOR_00020
0 MAJOR/test/MAJOR_00022
0 MAJOR/test/MAJOR_00025
0 MAJOR/train/MAJOR_00023
0 MAJOR/train/MAJOR_00027
0 MAJOR/train/MAJOR_00070
0 MAJOR/train/MAJOR_00073
0 MAJOR/train/MAJOR_00075
0 MAJOR/train/MAJOR_00076
0 MAJOR/train/MAJOR_00096
0 MAJOR/train/MAJOR_00098
0 MAJOR/train/MAJOR_00108
0 MAJOR/train/MAJOR_00153
0 MAJOR/train/MAJOR_00159
0 MAJOR/train/MAJOR_00164
0 MAJOR/train/MAJOR_00185
0 MAJOR/train/MAJOR_00186
0 MAJOR/train/MAJOR_00188
0 MAJOR/train/MAJOR_00205
0 MAJOR/train/MAJOR_00230
0 MAJOR/train/MAJOR_00243
0 MAJOR/train/MAJOR_00258
0 MAJOR/train/MAJOR_00270
0 MAJOR/train/MAJOR_00279
0 MAJOR/train/MAJOR_00288
0 MAJOR/train/MAJOR_00292
0 MAJOR/train/MAJOR_00305
0 MAJOR/train/MAJOR_00310
0 MAJOR/train/MAJOR_00313
0 MAJOR/train/MAJOR_00320
0 MAJOR/train/MAJOR_00322
0 MAJOR/train/MAJOR_00340
0 MAJOR/train/MAJOR_00379
0 MAJOR/train/MAJOR_00386
0 MAJOR/train/MAJOR_00423
0 MAJOR/train/MAJOR_00467
0 MAJOR/train/MAJOR_00485
0 MAJOR/train/MAJOR_00514
0 MAJOR/train/MAJOR_00532
0 MAJOR/train/MAJOR_00546
0 MAJOR/train/MAJOR_00583
0 MAJOR/train/MAJOR_00593
0 MAJOR/train/MAJOR_00606
0 MAJOR/train/MAJOR_00618
0 MAJOR/train/MAJOR_00638
0 MAJOR/train/MAJOR_00644
0 MAJOR/train/MAJOR_00666
0 MAJOR/train/MAJOR_00691
0 MAJOR/train/MAJOR_00695
0 MAJOR/train/MAJOR_00716
0 MAJOR/train/MAJOR_00726
0 MAJOR/train/MAJOR_00735
0 MAJOR/train/MAJOR_00749
0 MAJOR/train/MAJOR_00752
0 MAJOR/train/MAJOR_00753
0 MAJOR/train/MAJOR_00764
0 MAJOR/train/MAJOR_00776
0 MAJOR/train/MAJOR_00788
0 MAJOR/train/MAJOR_00805
0 MAJOR/train/MAJOR_00835
0 MAJOR/train/MAJOR_00846
0 MAJOR/train/MAJOR_00860
0 MAJOR/train/MAJOR_00864
0 MAJOR/train/MAJOR_00883
0 MAJOR/train/MAJOR_00887
0 MAJOR/train/MAJOR_00917
0 MAJOR/train/MAJOR_00934
0 MAJOR/train/MAJOR_00943
0 MAJOR/train/MAJOR_00947
0 MAJOR/train/MAJOR_00965
0 MAJOR/train/MAJOR_00973
0 MAJOR/train/MAJOR_00995
0 MAJOR/val/MAJOR_00003
0 MAJOR/val/MAJOR_00039
0 MAJOR/val/MAJOR_00047
0 MAKES/train/MAKES_00025
0 MAKES/train/MAKES_00413
0 MAKES/train/MAKES_00522
0 MAKES/train/MAKES_00743
0 MAKES/train/MAKES_00848
0 MAKES/train/MAKES_00860
0 MAKING/test/MAKING_00013
0 MAKING/train/MAKING_00078
0 MAKING/train/MAKING_00185
0 MAKING/train/MAKING_00288
0 MAKING/train/MAKING_00349
0 MAKING/train/MAKING_00447
0 MAKING/train/MAKING_00517
0 MAKING/train/MAKING_00536
0 MAKING/train/MAKING_00581
0 MAKING/train/MAKING_00582
0 MAKING/train/MAKING_00607
0 MAKING/train/MAKING_00782
0 MAKING/train/MAKING_00798
0 MAKING/train/MAKING_00816
0 MAKING/train/MAKING_00898
0 MANCHESTER/test/MANCHESTER_00012
0 MANCHESTER/train/MANCHESTER_00058
0 MANCHESTER/train/MANCHESTER_00080
0 MANCHESTER/train/MANCHESTER_00082
0 MANCHESTER/train/MANCHESTER_00113
0 MANCHESTER/train/MANCHESTER_00137
0 MANCHESTER/train/MANCHESTER_00165
0 MANCHESTER/train/MANCHESTER_00204
0 MANCHESTER/train/MANCHESTER_00207
0 MANCHESTER/train/MANCHESTER_00223
0 MANCHESTER/train/MANCHESTER_00231
0 MANCHESTER/train/MANCHESTER_00243
0 MANCHESTER/train/MANCHESTER_00249
0 MANCHESTER/train/MANCHESTER_00269
0 MANCHESTER/train/MANCHESTER_00301
0 MANCHESTER/train/MANCHESTER_00303
0 MANCHESTER/train/MANCHESTER_00325
0 MANCHESTER/train/MANCHESTER_00333
0 MANCHESTER/train/MANCHESTER_00357
0 MANCHESTER/train/MANCHESTER_00400
0 MANCHESTER/train/MANCHESTER_00414
0 MANCHESTER/train/MANCHESTER_00421
0 MANCHESTER/train/MANCHESTER_00433
0 MANCHESTER/train/MANCHESTER_00472
0 MANCHESTER/train/MANCHESTER_00493
0 MANCHESTER/train/MANCHESTER_00498
0 MANCHESTER/train/MANCHESTER_00507
0 MANCHESTER/train/MANCHESTER_00562
0 MANCHESTER/train/MANCHESTER_00565
0 MANCHESTER/train/MANCHESTER_00574
0 MANCHESTER/train/MANCHESTER_00606
0 MANCHESTER/train/MANCHESTER_00625
0 MANCHESTER/train/MANCHESTER_00631
0 MANCHESTER/train/MANCHESTER_00638
0 MANCHESTER/train/MANCHESTER_00672
0 MANCHESTER/train/MANCHESTER_00690
0 MANCHESTER/train/MANCHESTER_00691
0 MANCHESTER/train/MANCHESTER_00698
0 MANCHESTER/train/MANCHESTER_00704
0 MANCHESTER/train/MANCHESTER_00725
0 MANCHESTER/train/MANCHESTER_00744
0 MANCHESTER/train/MANCHESTER_00747
0 MANCHESTER/train/MANCHESTER_00761
0 MANCHESTER/train/MANCHESTER_00779
0 MANCHESTER/train/MANCHESTER_00782
0 MANCHESTER/train/MANCHESTER_00790
0 MANCHESTER/train/MANCHESTER_00808
0 MANCHESTER/train/MANCHESTER_00814
0 MANCHESTER/train/MANCHESTER_00815
0 MANCHESTER/train/MANCHESTER_00828
0 MANCHESTER/train/MANCHESTER_00840
0 MANCHESTER/train/MANCHESTER_00842
0 MANCHESTER/train/MANCHESTER_00874
0 MANCHESTER/train/MANCHESTER_00875
0 MANCHESTER/train/MANCHESTER_00879
0 MANCHESTER/train/MANCHESTER_00900
0 MANCHESTER/train/MANCHESTER_00912
0 MANCHESTER/train/MANCHESTER_00934
0 MANCHESTER/train/MANCHESTER_00940
0 MANCHESTER/train/MANCHESTER_00966
0 MANCHESTER/train/MANCHESTER_00982
0 MANCHESTER/train/MANCHESTER_00997
0 MANCHESTER/val/MANCHESTER_00006
0 MANCHESTER/val/MANCHESTER_00022
0 MANCHESTER/val/MANCHESTER_00023
0 MANCHESTER/val/MANCHESTER_00028
0 MARKET/test/MARKET_00041
0 MARKET/train/MARKET_00050
0 MARKET/train/MARKET_00054
0 MARKET/train/MARKET_00058
0 MARKET/train/MARKET_00198
0 MARKET/train/MARKET_00267
0 MARKET/train/MARKET_00349
0 MARKET/train/MARKET_00417
0 MARKET/train/MARKET_00427
0 MARKET/train/MARKET_00462
0 MARKET/train/MARKET_00522
0 MARKET/train/MARKET_00596
0 MARKET/train/MARKET_00640
0 MARKET/train/MARKET_00722
0 MARKET/train/MARKET_00723
0 MARKET/train/MARKET_00729
0 MARKET/train/MARKET_00747
0 MARKET/train/MARKET_00775
0 MARKET/train/MARKET_00863
0 MARKET/train/MARKET_00880
0 MARKET/train/MARKET_00937
0 MARKET/train/MARKET_00963
0 MARKET/train/MARKET_00976
0 MARKET/val/MARKET_00011
0 MASSIVE/train/MASSIVE_00025
0 MASSIVE/train/MASSIVE_00100
0 MASSIVE/train/MASSIVE_00114
0 MASSIVE/train/MASSIVE_00170
0 MASSIVE/train/MASSIVE_00196
0 MASSIVE/train/MASSIVE_00250
0 MASSIVE/train/MASSIVE_00260
0 MASSIVE/train/MASSIVE_00278
0 MASSIVE/train/MASSIVE_00315
0 MASSIVE/train/MASSIVE_00342
0 MASSIVE/train/MASSIVE_00355
0 MASSIVE/train/MASSIVE_00445
0 MASSIVE/train/MASSIVE_00550
0 MASSIVE/train/MASSIVE_00602
0 MASSIVE/train/MASSIVE_00624
0 MASSIVE/train/MASSIVE_00643
0 MASSIVE/train/MASSIVE_00645
0 MASSIVE/train/MASSIVE_00728
0 MASSIVE/train/MASSIVE_00790
0 MATTER/train/MATTER_00255
0 MATTER/train/MATTER_00371
0 MATTER/train/MATTER_00642
0 MATTER/train/MATTER_00732
0 MATTER/train/MATTER_00773
0 MATTER/train/MATTER_00808
0 MEANS/train/MEANS_00155
0 MEANS/train/MEANS_00214
0 MEANS/train/MEANS_00354
0 MEANS/train/MEANS_00358
0 MEANS/train/MEANS_00363
0 MEANS/train/MEANS_00378
0 MEANS/train/MEANS_00450
0 MEANS/train/MEANS_00597
0 MEANS/train/MEANS_00665
0 MEANS/train/MEANS_00793
0 MEANS/train/MEANS_00852
0 MEANS/train/MEANS_00917
0 MEANS/train/MEANS_00957
0 MEANS/train/MEANS_00994
0 MEASURES/test/MEASURES_00026
0 MEASURES/test/MEASURES_00032
0 MEASURES/test/MEASURES_00048
0 MEASURES/test/MEASURES_00049
0 MEASURES/train/MEASURES_00008
0 MEASURES/train/MEASURES_00009
0 MEASURES/train/MEASURES_00025
0 MEASURES/train/MEASURES_00040
0 MEASURES/train/MEASURES_00042
0 MEASURES/train/MEASURES_00054
0 MEASURES/train/MEASURES_00055
0 MEASURES/train/MEASURES_00060
0 MEASURES/train/MEASURES_00097
0 MEASURES/train/MEASURES_00098
0 MEASURES/train/MEASURES_00112
0 MEASURES/train/MEASURES_00114
0 MEASURES/train/MEASURES_00121
0 MEASURES/train/MEASURES_00151
0 MEASURES/train/MEASURES_00157
0 MEASURES/train/MEASURES_00188
0 MEASURES/train/MEASURES_00210
0 MEASURES/train/MEASURES_00215
0 MEASURES/train/MEASURES_00220
0 MEASURES/train/MEASURES_00224
0 MEASURES/train/MEASURES_00229
0 MEASURES/train/MEASURES_00239
0 MEASURES/train/MEASURES_00241
0 MEASURES/train/MEASURES_00272
0 MEASURES/train/MEASURES_00284
0 MEASURES/train/MEASURES_00285
0 MEASURES/train/MEASURES_00287
0 MEASURES/train/MEASURES_00290
0 MEASURES/train/MEASURES_00315
0 MEASURES/train/MEASURES_00321
0 MEASURES/train/MEASURES_00324
0 MEASURES/train/MEASURES_00330
0 MEASURES/train/MEASURES_00333
0 MEASURES/train/MEASURES_00338
0 MEASURES/train/MEASURES_00360
0 MEASURES/train/MEASURES_00418
0 MEASURES/train/MEASURES_00424
0 MEASURES/train/MEASURES_00427
0 MEASURES/train/MEASURES_00430
0 MEASURES/train/MEASURES_00434
0 MEASURES/train/MEASURES_00522
0 MEASURES/train/MEASURES_00586
0 MEASURES/train/MEASURES_00588
0 MEASURES/train/MEASURES_00589
0 MEASURES/train/MEASURES_00611
0 MEASURES/train/MEASURES_00624
0 MEASURES/train/MEASURES_00628
0 MEASURES/train/MEASURES_00640
0 MEASURES/train/MEASURES_00667
0 MEASURES/train/MEASURES_00669
0 MEASURES/train/MEASURES_00699
0 MEASURES/train/MEASURES_00716
0 MEASURES/train/MEASURES_00733
0 MEASURES/train/MEASURES_00747
0 MEASURES/train/MEASURES_00757
0 MEASURES/train/MEASURES_00770
0 MEASURES/train/MEASURES_00787
0 MEASURES/train/MEASURES_00792
0 MEASURES/train/MEASURES_00796
0 MEASURES/train/MEASURES_00799
0 MEASURES/train/MEASURES_00840
0 MEASURES/train/MEASURES_00850
0 MEASURES/train/MEASURES_00861
0 MEASURES/train/MEASURES_00863
0 MEASURES/train/MEASURES_00904
0 MEASURES/train/MEASURES_00913
0 MEASURES/train/MEASURES_00933
0 MEASURES/val/MEASURES_00015
0 MEASURES/val/MEASURES_00033
0 MEASURES/val/MEASURES_00050
0 MEDIA/test/MEDIA_00019
0 MEDIA/train/MEDIA_00022
0 MEDIA/train/MEDIA_00047
0 MEDIA/train/MEDIA_00294
0 MEDIA/train/MEDIA_00317
0 MEDIA/train/MEDIA_00339
0 MEDIA/train/MEDIA_00361
0 MEDIA/train/MEDIA_00374
0 MEDIA/train/MEDIA_00468
0 MEDIA/train/MEDIA_00497
0 MEDIA/train/MEDIA_00652
0 MEDIA/train/MEDIA_00668
0 MEDIA/train/MEDIA_00678
0 MEDIA/train/MEDIA_00702
0 MEDIA/train/MEDIA_00708
0 MEDIA/train/MEDIA_00709
0 MEDIA/train/MEDIA_00726
0 MEDIA/train/MEDIA_00761
0 MEDIA/train/MEDIA_00799
0 MEDIA/train/MEDIA_00837
0 MEDIA/train/MEDIA_00842
0 MEDIA/train/MEDIA_00851
0 MEDIA/train/MEDIA_00894
0 MEDIA/val/MEDIA_00003
0 MEDIA/val/MEDIA_00025
0 MEDICAL/test/MEDICAL_00033
0 MEDICAL/test/MEDICAL_00042
0 MEDICAL/train/MEDICAL_00003
0 MEDICAL/train/MEDICAL_00031
0 MEDICAL/train/MEDICAL_00038
0 MEDICAL/train/MEDICAL_00043
0 MEDICAL/train/MEDICAL_00051
0 MEDICAL/train/MEDICAL_00075
0 MEDICAL/train/MEDICAL_00108
0 MEDICAL/train/MEDICAL_00123
0 MEDICAL/train/MEDICAL_00198
0 MEDICAL/train/MEDICAL_00229
0 MEDICAL/train/MEDICAL_00249
0 MEDICAL/train/MEDICAL_00252
0 MEDICAL/train/MEDICAL_00288
0 MEDICAL/train/MEDICAL_00296
0 MEDICAL/train/MEDICAL_00308
0 MEDICAL/train/MEDICAL_00317
0 MEDICAL/train/MEDICAL_00339
0 MEDICAL/train/MEDICAL_00360
0 MEDICAL/train/MEDICAL_00371
0 MEDICAL/train/MEDICAL_00394
0 MEDICAL/train/MEDICAL_00408
0 MEDICAL/train/MEDICAL_00419
0 MEDICAL/train/MEDICAL_00431
0 MEDICAL/train/MEDICAL_00477
0 MEDICAL/train/MEDICAL_00479
0 MEDICAL/train/MEDICAL_00489
0 MEDICAL/train/MEDICAL_00495
0 MEDICAL/train/MEDICAL_00506
0 MEDICAL/train/MEDICAL_00527
0 MEDICAL/train/MEDICAL_00541
0 MEDICAL/train/MEDICAL_00564
0 MEDICAL/train/MEDICAL_00592
0 MEDICAL/train/MEDICAL_00616
0 MEDICAL/train/MEDICAL_00627
0 MEDICAL/train/MEDICAL_00630
0 MEDICAL/train/MEDICAL_00635
0 MEDICAL/train/MEDICAL_00658
0 MEDICAL/train/MEDICAL_00667
0 MEDICAL/train/MEDICAL_00685
0 MEDICAL/train/MEDICAL_00696
0 MEDICAL/train/MEDICAL_00699
0 MEDICAL/train/MEDICAL_00718
0 MEDICAL/train/MEDICAL_00723
0 MEDICAL/train/MEDICAL_00736
0 MEDICAL/train/MEDICAL_00755
0 MEDICAL/train/MEDICAL_00770
0 MEDICAL/train/MEDICAL_00787
0 MEDICAL/train/MEDICAL_00831
0 MEDICAL/train/MEDICAL_00837
0 MEDICAL/train/MEDICAL_00852
0 MEDICAL/train/MEDICAL_00857
0 MEDICAL/train/MEDICAL_00859
0 MEDICAL/train/MEDICAL_00870
0 MEDICAL/val/MEDICAL_00002
0 MEDICAL/val/MEDICAL_00010
0 MEDICAL/val/MEDICAL_00018
0 MEETING/test/MEETING_00009
0 MEETING/train/MEETING_00033
0 MEETING/train/MEETING_00034
0 MEETING/train/MEETING_00038
0 MEETING/train/MEETING_00056
0 MEETING/train/MEETING_00114
0 MEETING/train/MEETING_00118
0 MEETING/train/MEETING_00131
0 MEETING/train/MEETING_00135
0 MEETING/train/MEETING_00222
0 MEETING/train/MEETING_00231
0 MEETING/train/MEETING_00246
0 MEETING/train/MEETING_00257
0 MEETING/train/MEETING_00320
0 MEETING/train/MEETING_00324
0 MEETING/train/MEETING_00333
0 MEETING/train/MEETING_00337
0 MEETING/train/MEETING_00358
0 MEETING/train/MEETING_00379
0 MEETING/train/MEETING_00399
0 MEETING/train/MEETING_00401
0 MEETING/train/MEETING_00421
0 MEETING/train/MEETING_00423
0 MEETING/train/MEETING_00428
0 MEETING/train/MEETING_00441
0 MEETING/train/MEETING_00445
0 MEETING/train/MEETING_00476
0 MEETING/train/MEETING_00481
0 MEETING/train/MEETING_00509
0 MEETING/train/MEETING_00532
0 MEETING/train/MEETING_00576
0 MEETING/train/MEETING_00630
0 MEETING/train/MEETING_00679
0 MEETING/train/MEETING_00745
0 MEETING/train/MEETING_00746
0 MEETING/train/MEETING_00782
0 MEETING/train/MEETING_00800
0 MEETING/train/MEETING_00835
0 MEETING/train/MEETING_00844
0 MEETING/train/MEETING_00908
0 MEETING/train/MEETING_00917
0 MEETING/train/MEETING_00960
0 MEETING/train/MEETING_00996
0 MEETING/val/MEETING_00020
0 MEETING/val/MEETING_00044
0 MEETING/val/MEETING_00048
0 MEMBERS/test/MEMBERS_00013
0 MEMBERS/train/MEMBERS_00064
0 MEMBERS/train/MEMBERS_00086
0 MEMBERS/train/MEMBERS_00104
0 MEMBERS/train/MEMBERS_00121
0 MEMBERS/train/MEMBERS_00123
0 MEMBERS/train/MEMBERS_00144
0 MEMBERS/train/MEMBERS_00145
0 MEMBERS/train/MEMBERS_00160
0 MEMBERS/train/MEMBERS_00161
0 MEMBERS/train/MEMBERS_00168
0 MEMBERS/train/MEMBERS_00199
0 MEMBERS/train/MEMBERS_00211
0 MEMBERS/train/MEMBERS_00254
0 MEMBERS/train/MEMBERS_00272
0 MEMBERS/train/MEMBERS_00273
0 MEMBERS/train/MEMBERS_00287
0 MEMBERS/train/MEMBERS_00311
0 MEMBERS/train/MEMBERS_00340
0 MEMBERS/train/MEMBERS_00344
0 MEMBERS/train/MEMBERS_00364
0 MEMBERS/train/MEMBERS_00370
0 MEMBERS/train/MEMBERS_00376
0 MEMBERS/train/MEMBERS_00385
0 MEMBERS/train/MEMBERS_00580
0 MEMBERS/train/MEMBERS_00621
0 MEMBERS/train/MEMBERS_00681
0 MEMBERS/train/MEMBERS_00712
0 MEMBERS/train/MEMBERS_00734
0 MEMBERS/train/MEMBERS_00737
0 MEMBERS/train/MEMBERS_00746
0 MEMBERS/train/MEMBERS_00749
0 MEMBERS/train/MEMBERS_00793
0 MEMBERS/train/MEMBERS_00796
0 MEMBERS/train/MEMBERS_00825
0 MEMBERS/train/MEMBERS_00834
0 MEMBERS/train/MEMBERS_00836
0 MEMBERS/train/MEMBERS_00841
0 MEMBERS/train/MEMBERS_00863
0 MEMBERS/train/MEMBERS_00872
0 MEMBERS/train/MEMBERS_00883
0 MEMBERS/train/MEMBERS_00945
0 MEMBERS/train/MEMBERS_00967
0 MEMBERS/train/MEMBERS_00995
0 MEMBERS/train/MEMBERS_00996
0 MEMBER/test/MEMBER_00038
0 MEMBER/train/MEMBER_00031
0 MEMBER/train/MEMBER_00037
0 MEMBER/train/MEMBER_00044
0 MEMBER/train/MEMBER_00045
0 MEMBER/train/MEMBER_00058
0 MEMBER/train/MEMBER_00063
0 MEMBER/train/MEMBER_00133
0 MEMBER/train/MEMBER_00194
0 MEMBER/train/MEMBER_00203
0 MEMBER/train/MEMBER_00218
0 MEMBER/train/MEMBER_00248
0 MEMBER/train/MEMBER_00295
0 MEMBER/train/MEMBER_00314
0 MEMBER/train/MEMBER_00338
0 MEMBER/train/MEMBER_00340
0 MEMBER/train/MEMBER_00361
0 MEMBER/train/MEMBER_00395
0 MEMBER/train/MEMBER_00450
0 MEMBER/train/MEMBER_00495
0 MEMBER/train/MEMBER_00503
0 MEMBER/train/MEMBER_00522
0 MEMBER/train/MEMBER_00564
0 MEMBER/train/MEMBER_00570
0 MEMBER/train/MEMBER_00577
0 MEMBER/train/MEMBER_00652
0 MEMBER/train/MEMBER_00692
0 MEMBER/train/MEMBER_00709
0 MEMBER/train/MEMBER_00711
0 MEMBER/val/MEMBER_00028
0 MESSAGE/test/MESSAGE_00029
0 MESSAGE/train/MESSAGE_00087
0 MESSAGE/train/MESSAGE_00119
0 MESSAGE/train/MESSAGE_00122
0 MESSAGE/train/MESSAGE_00133
0 MESSAGE/train/MESSAGE_00154
0 MESSAGE/train/MESSAGE_00268
0 MESSAGE/train/MESSAGE_00276
0 MESSAGE/train/MESSAGE_00320
0 MESSAGE/train/MESSAGE_00359
0 MESSAGE/train/MESSAGE_00388
0 MESSAGE/train/MESSAGE_00427
0 MESSAGE/train/MESSAGE_00441
0 MESSAGE/train/MESSAGE_00445
0 MESSAGE/train/MESSAGE_00513
0 MESSAGE/train/MESSAGE_00593
0 MESSAGE/train/MESSAGE_00628
0 MESSAGE/train/MESSAGE_00720
0 MESSAGE/train/MESSAGE_00751
0 MESSAGE/train/MESSAGE_00771
0 MESSAGE/train/MESSAGE_00820
0 MESSAGE/train/MESSAGE_00867
0 MESSAGE/train/MESSAGE_00871
0 MESSAGE/train/MESSAGE_00876
0 MESSAGE/train/MESSAGE_00906
0 MESSAGE/train/MESSAGE_00973
0 MIDDLE/test/MIDDLE_00022
0 MIDDLE/train/MIDDLE_00011
0 MIDDLE/train/MIDDLE_00088
0 MIDDLE/train/MIDDLE_00119
0 MIDDLE/train/MIDDLE_00162
0 MIDDLE/train/MIDDLE_00202
0 MIDDLE/train/MIDDLE_00243
0 MIDDLE/train/MIDDLE_00259
0 MIDDLE/train/MIDDLE_00260
0 MIDDLE/train/MIDDLE_00271
0 MIDDLE/train/MIDDLE_00275
0 MIDDLE/train/MIDDLE_00278
0 MIDDLE/train/MIDDLE_00279
0 MIDDLE/train/MIDDLE_00296
0 MIDDLE/train/MIDDLE_00311
0 MIDDLE/train/MIDDLE_00330
0 MIDDLE/train/MIDDLE_00336
0 MIDDLE/train/MIDDLE_00351
0 MIDDLE/train/MIDDLE_00366
0 MIDDLE/train/MIDDLE_00390
0 MIDDLE/train/MIDDLE_00407
0 MIDDLE/train/MIDDLE_00419
0 MIDDLE/train/MIDDLE_00430
0 MIDDLE/train/MIDDLE_00441
0 MIDDLE/train/MIDDLE_00445
0 MIDDLE/train/MIDDLE_00507
0 MIDDLE/train/MIDDLE_00517
0 MIDDLE/train/MIDDLE_00568
0 MIDDLE/train/MIDDLE_00597
0 MIDDLE/train/MIDDLE_00609
0 MIDDLE/train/MIDDLE_00614
0 MIDDLE/train/MIDDLE_00627
0 MIDDLE/train/MIDDLE_00640
0 MIDDLE/train/MIDDLE_00649
0 MIDDLE/train/MIDDLE_00659
0 MIDDLE/train/MIDDLE_00665
0 MIDDLE/train/MIDDLE_00814
0 MIDDLE/train/MIDDLE_00823
0 MIDDLE/train/MIDDLE_00857
0 MIDDLE/train/MIDDLE_00874
0 MIDDLE/train/MIDDLE_00886
0 MIDDLE/train/MIDDLE_00925
0 MIDDLE/train/MIDDLE_00930
0 MIDDLE/train/MIDDLE_00933
0 MIDDLE/train/MIDDLE_00936
0 MIDDLE/train/MIDDLE_00944
0 MIGHT/train/MIGHT_00214
0 MIGHT/train/MIGHT_00235
0 MIGHT/train/MIGHT_00286
0 MIGHT/train/MIGHT_00383
0 MIGHT/train/MIGHT_00508
0 MIGHT/train/MIGHT_00558
0 MIGHT/train/MIGHT_00576
0 MIGHT/train/MIGHT_00585
0 MIGHT/train/MIGHT_00745
0 MIGHT/train/MIGHT_00779
0 MIGHT/train/MIGHT_00797
0 MIGHT/train/MIGHT_00845
0 MIGHT/val/MIGHT_00034
0 MIGHT/val/MIGHT_00047
0 MIGRANTS/test/MIGRANTS_00016
0 MIGRANTS/train/MIGRANTS_00074
0 MIGRANTS/train/MIGRANTS_00077
0 MIGRANTS/train/MIGRANTS_00082
0 MIGRANTS/train/MIGRANTS_00144
0 MIGRANTS/train/MIGRANTS_00148
0 MIGRANTS/train/MIGRANTS_00173
0 MIGRANTS/train/MIGRANTS_00184
0 MIGRANTS/train/MIGRANTS_00192
0 MIGRANTS/train/MIGRANTS_00210
0 MIGRANTS/train/MIGRANTS_00254
0 MIGRANTS/train/MIGRANTS_00264
0 MIGRANTS/train/MIGRANTS_00268
0 MIGRANTS/train/MIGRANTS_00299
0 MIGRANTS/train/MIGRANTS_00331
0 MIGRANTS/train/MIGRANTS_00333
0 MIGRANTS/train/MIGRANTS_00389
0 MIGRANTS/train/MIGRANTS_00409
0 MIGRANTS/train/MIGRANTS_00471
0 MIGRANTS/train/MIGRANTS_00520
0 MIGRANTS/train/MIGRANTS_00537
0 MIGRANTS/train/MIGRANTS_00542
0 MIGRANTS/train/MIGRANTS_00555
0 MIGRANTS/train/MIGRANTS_00615
0 MIGRANTS/train/MIGRANTS_00622
0 MIGRANTS/train/MIGRANTS_00631
0 MIGRANTS/train/MIGRANTS_00655
0 MIGRANTS/train/MIGRANTS_00676
0 MIGRANTS/train/MIGRANTS_00677
0 MIGRANTS/train/MIGRANTS_00678
0 MIGRANTS/train/MIGRANTS_00723
0 MIGRANTS/train/MIGRANTS_00724
0 MIGRANTS/train/MIGRANTS_00824
0 MIGRANTS/train/MIGRANTS_00834
0 MIGRANTS/train/MIGRANTS_00848
0 MIGRANTS/train/MIGRANTS_00863
0 MIGRANTS/val/MIGRANTS_00011
0 MIGRANTS/val/MIGRANTS_00013
0 MIGRANTS/val/MIGRANTS_00030
0 MILITARY/test/MILITARY_00023
0 MILITARY/train/MILITARY_00023
0 MILITARY/train/MILITARY_00103
0 MILITARY/train/MILITARY_00150
0 MILITARY/train/MILITARY_00164
0 MILITARY/train/MILITARY_00171
0 MILITARY/train/MILITARY_00180
0 MILITARY/train/MILITARY_00181
0 MILITARY/train/MILITARY_00191
0 MILITARY/train/MILITARY_00209
0 MILITARY/train/MILITARY_00222
0 MILITARY/train/MILITARY_00230
0 MILITARY/train/MILITARY_00234
0 MILITARY/train/MILITARY_00266
0 MILITARY/train/MILITARY_00275
0 MILITARY/train/MILITARY_00293
0 MILITARY/train/MILITARY_00312
0 MILITARY/train/MILITARY_00317
0 MILITARY/train/MILITARY_00327
0 MILITARY/train/MILITARY_00332
0 MILITARY/train/MILITARY_00333
0 MILITARY/train/MILITARY_00392
0 MILITARY/train/MILITARY_00401
0 MILITARY/train/MILITARY_00407
0 MILITARY/train/MILITARY_00415
0 MILITARY/train/MILITARY_00438
0 MILITARY/train/MILITARY_00458
0 MILITARY/train/MILITARY_00480
0 MILITARY/train/MILITARY_00494
0 MILITARY/train/MILITARY_00501
0 MILITARY/train/MILITARY_00551
0 MILITARY/train/MILITARY_00558
0 MILITARY/train/MILITARY_00589
0 MILITARY/train/MILITARY_00593
0 MILITARY/train/MILITARY_00599
0 MILITARY/train/MILITARY_00624
0 MILITARY/train/MILITARY_00649
0 MILITARY/train/MILITARY_00657
0 MILITARY/train/MILITARY_00665
0 MILITARY/train/MILITARY_00666
0 MILITARY/train/MILITARY_00679
0 MILITARY/train/MILITARY_00711
0 MILITARY/train/MILITARY_00726
0 MILITARY/train/MILITARY_00756
0 MILITARY/train/MILITARY_00764
0 MILITARY/train/MILITARY_00821
0 MILITARY/train/MILITARY_00823
0 MILITARY/train/MILITARY_00825
0 MILITARY/train/MILITARY_00836
0 MILITARY/train/MILITARY_00928
0 MILITARY/train/MILITARY_00997
0 MILITARY/val/MILITARY_00033
0 MILLIONS/test/MILLIONS_00026
0 MILLIONS/test/MILLIONS_00027
0 MILLIONS/train/MILLIONS_00015
0 MILLIONS/train/MILLIONS_00017
0 MILLIONS/train/MILLIONS_00024
0 MILLIONS/train/MILLIONS_00025
0 MILLIONS/train/MILLIONS_00048
0 MILLIONS/train/MILLIONS_00054
0 MILLIONS/train/MILLIONS_00067
0 MILLIONS/train/MILLIONS_00071
0 MILLIONS/train/MILLIONS_00081
0 MILLIONS/train/MILLIONS_00093
0 MILLIONS/train/MILLIONS_00106
0 MILLIONS/train/MILLIONS_00107
0 MILLIONS/train/MILLIONS_00108
0 MILLIONS/train/MILLIONS_00116
0 MILLIONS/train/MILLIONS_00121
0 MILLIONS/train/MILLIONS_00140
0 MILLIONS/train/MILLIONS_00161
0 MILLIONS/train/MILLIONS_00163
0 MILLIONS/train/MILLIONS_00179
0 MILLIONS/train/MILLIONS_00261
0 MILLIONS/train/MILLIONS_00270
0 MILLIONS/train/MILLIONS_00356
0 MILLIONS/train/MILLIONS_00388
0 MILLIONS/train/MILLIONS_00400
0 MILLIONS/train/MILLIONS_00454
0 MILLIONS/train/MILLIONS_00470
0 MILLIONS/train/MILLIONS_00475
0 MILLIONS/train/MILLIONS_00492
0 MILLIONS/train/MILLIONS_00494
0 MILLIONS/train/MILLIONS_00495
0 MILLIONS/train/MILLIONS_00533
0 MILLIONS/train/MILLIONS_00542
0 MILLIONS/train/MILLIONS_00548
0 MILLIONS/train/MILLIONS_00553
0 MILLIONS/train/MILLIONS_00558
0 MILLIONS/train/MILLIONS_00575
0 MILLIONS/train/MILLIONS_00625
0 MILLIONS/train/MILLIONS_00632
0 MILLIONS/train/MILLIONS_00660
0 MILLIONS/train/MILLIONS_00678
0 MILLIONS/train/MILLIONS_00696
0 MILLIONS/train/MILLIONS_00735
0 MILLIONS/train/MILLIONS_00748
0 MILLIONS/train/MILLIONS_00755
0 MILLIONS/train/MILLIONS_00806
0 MILLIONS/train/MILLIONS_00834
0 MILLIONS/train/MILLIONS_00852
0 MILLIONS/train/MILLIONS_00877
0 MILLIONS/train/MILLIONS_00953
0 MILLIONS/train/MILLIONS_00960
0 MILLIONS/train/MILLIONS_00962
0 MILLIONS/train/MILLIONS_00964
0 MILLIONS/val/MILLIONS_00006
0 MILLIONS/val/MILLIONS_00018
0 MILLIONS/val/MILLIONS_00021
0 MILLIONS/val/MILLIONS_00027
0 MILLIONS/val/MILLIONS_00028
0 MILLIONS/val/MILLIONS_00031
0 MILLIONS/val/MILLIONS_00044
0 MILLION/test/MILLION_00041
0 MILLION/train/MILLION_00002
0 MILLION/train/MILLION_00012
0 MILLION/train/MILLION_00049
0 MILLION/train/MILLION_00067
0 MILLION/train/MILLION_00070
0 MILLION/train/MILLION_00073
0 MILLION/train/MILLION_00080
0 MILLION/train/MILLION_00152
0 MILLION/train/MILLION_00175
0 MILLION/train/MILLION_00239
0 MILLION/train/MILLION_00282
0 MILLION/train/MILLION_00315
0 MILLION/train/MILLION_00356
0 MILLION/train/MILLION_00375
0 MILLION/train/MILLION_00420
0 MILLION/train/MILLION_00424
0 MILLION/train/MILLION_00439
0 MILLION/train/MILLION_00448
0 MILLION/train/MILLION_00450
0 MILLION/train/MILLION_00463
0 MILLION/train/MILLION_00472
0 MILLION/train/MILLION_00473
0 MILLION/train/MILLION_00480
0 MILLION/train/MILLION_00481
0 MILLION/train/MILLION_00489
0 MILLION/train/MILLION_00490
0 MILLION/train/MILLION_00495
0 MILLION/train/MILLION_00541
0 MILLION/train/MILLION_00608
0 MILLION/train/MILLION_00625
0 MILLION/train/MILLION_00639
0 MILLION/train/MILLION_00649
0 MILLION/train/MILLION_00656
0 MILLION/train/MILLION_00667
0 MILLION/train/MILLION_00670
0 MILLION/train/MILLION_00689
0 MILLION/train/MILLION_00696
0 MILLION/train/MILLION_00700
0 MILLION/train/MILLION_00706
0 MILLION/train/MILLION_00756
0 MILLION/train/MILLION_00761
0 MILLION/train/MILLION_00768
0 MILLION/train/MILLION_00792
0 MILLION/train/MILLION_00803
0 MILLION/train/MILLION_00827
0 MILLION/train/MILLION_00844
0 MILLION/train/MILLION_00853
0 MILLION/train/MILLION_00865
0 MILLION/train/MILLION_00872
0 MILLION/train/MILLION_00897
0 MILLION/train/MILLION_00967
0 MILLION/train/MILLION_00972
0 MILLION/train/MILLION_00994
0 MILLION/train/MILLION_00998
0 MILLION/val/MILLION_00019
0 MILLION/val/MILLION_00022
0 MILLION/val/MILLION_00032
0 MINISTERS/test/MINISTERS_00036
0 MINISTERS/test/MINISTERS_00045
0 MINISTERS/train/MINISTERS_00014
0 MINISTERS/train/MINISTERS_00042
0 MINISTERS/train/MINISTERS_00049
0 MINISTERS/train/MINISTERS_00067
0 MINISTERS/train/MINISTERS_00069
0 MINISTERS/train/MINISTERS_00079
0 MINISTERS/train/MINISTERS_00083
0 MINISTERS/train/MINISTERS_00084
0 MINISTERS/train/MINISTERS_00099
0 MINISTERS/train/MINISTERS_00104
0 MINISTERS/train/MINISTERS_00121
0 MINISTERS/train/MINISTERS_00130
0 MINISTERS/train/MINISTERS_00136
0 MINISTERS/train/MINISTERS_00144
0 MINISTERS/train/MINISTERS_00149
0 MINISTERS/train/MINISTERS_00198
0 MINISTERS/train/MINISTERS_00206
0 MINISTERS/train/MINISTERS_00220
0 MINISTERS/train/MINISTERS_00232
0 MINISTERS/train/MINISTERS_00235
0 MINISTERS/train/MINISTERS_00238
0 MINISTERS/train/MINISTERS_00251
0 MINISTERS/train/MINISTERS_00252
0 MINISTERS/train/MINISTERS_00253
0 MINISTERS/train/MINISTERS_00260
0 MINISTERS/train/MINISTERS_00261
0 MINISTERS/train/MINISTERS_00276
0 MINISTERS/train/MINISTERS_00297
0 MINISTERS/train/MINISTERS_00312
0 MINISTERS/train/MINISTERS_00313
0 MINISTERS/train/MINISTERS_00325
0 MINISTERS/train/MINISTERS_00337
0 MINISTERS/train/MINISTERS_00341
0 MINISTERS/train/MINISTERS_00344
0 MINISTERS/train/MINISTERS_00354
0 MINISTERS/train/MINISTERS_00398
0 MINISTERS/train/MINISTERS_00400
0 MINISTERS/train/MINISTERS_00424
0 MINISTERS/train/MINISTERS_00435
0 MINISTERS/train/MINISTERS_00445
0 MINISTERS/train/MINISTERS_00446
0 MINISTERS/train/MINISTERS_00447
0 MINISTERS/train/MINISTERS_00449
0 MINISTERS/train/MINISTERS_00457
0 MINISTERS/train/MINISTERS_00458
0 MINISTERS/train/MINISTERS_00464
0 MINISTERS/train/MINISTERS_00468
0 MINISTERS/train/MINISTERS_00483
0 MINISTERS/train/MINISTERS_00485
0 MINISTERS/train/MINISTERS_00504
0 MINISTERS/train/MINISTERS_00543
0 MINISTERS/train/MINISTERS_00600
0 MINISTERS/train/MINISTERS_00631
0 MINISTERS/train/MINISTERS_00644
0 MINISTERS/train/MINISTERS_00679
0 MINISTERS/train/MINISTERS_00691
0 MINISTERS/train/MINISTERS_00701
0 MINISTERS/train/MINISTERS_00703
0 MINISTERS/train/MINISTERS_00734
0 MINISTERS/train/MINISTERS_00744
0 MINISTERS/train/MINISTERS_00773
0 MINISTERS/train/MINISTERS_00794
0 MINISTERS/train/MINISTERS_00797
0 MINISTERS/train/MINISTERS_00803
0 MINISTERS/train/MINISTERS_00837
0 MINISTERS/train/MINISTERS_00838
0 MINISTERS/train/MINISTERS_00850
0 MINISTERS/train/MINISTERS_00853
0 MINISTERS/train/MINISTERS_00862
0 MINISTERS/train/MINISTERS_00870
0 MINISTERS/train/MINISTERS_00889
0 MINISTERS/train/MINISTERS_00891
0 MINISTERS/train/MINISTERS_00899
0 MINISTERS/train/MINISTERS_00906
0 MINISTERS/train/MINISTERS_00921
0 MINISTERS/train/MINISTERS_00936
0 MINISTERS/train/MINISTERS_00938
0 MINISTERS/train/MINISTERS_00939
0 MINISTERS/train/MINISTERS_00944
0 MINISTERS/train/MINISTERS_00959
0 MINISTERS/train/MINISTERS_00970
0 MINISTERS/train/MINISTERS_00985
0 MINISTERS/train/MINISTERS_00994
0 MINISTERS/train/MINISTERS_01000
0 MINISTERS/val/MINISTERS_00009
0 MINISTERS/val/MINISTERS_00039
0 MINISTER/test/MINISTER_00019
0 MINISTER/test/MINISTER_00028
0 MINISTER/train/MINISTER_00049
0 MINISTER/train/MINISTER_00078
0 MINISTER/train/MINISTER_00101
0 MINISTER/train/MINISTER_00132
0 MINISTER/train/MINISTER_00178
0 MINISTER/train/MINISTER_00185
0 MINISTER/train/MINISTER_00211
0 MINISTER/train/MINISTER_00212
0 MINISTER/train/MINISTER_00216
0 MINISTER/train/MINISTER_00220
0 MINISTER/train/MINISTER_00225
0 MINISTER/train/MINISTER_00242
0 MINISTER/train/MINISTER_00244
0 MINISTER/train/MINISTER_00286
0 MINISTER/train/MINISTER_00325
0 MINISTER/train/MINISTER_00373
0 MINISTER/train/MINISTER_00390
0 MINISTER/train/MINISTER_00396
0 MINISTER/train/MINISTER_00404
0 MINISTER/train/MINISTER_00413
0 MINISTER/train/MINISTER_00426
0 MINISTER/train/MINISTER_00445
0 MINISTER/train/MINISTER_00448
0 MINISTER/train/MINISTER_00455
0 MINISTER/train/MINISTER_00459
0 MINISTER/train/MINISTER_00488
0 MINISTER/train/MINISTER_00491
0 MINISTER/train/MINISTER_00601
0 MINISTER/train/MINISTER_00612
0 MINISTER/train/MINISTER_00651
0 MINISTER/train/MINISTER_00675
0 MINISTER/train/MINISTER_00679
0 MINISTER/train/MINISTER_00683
0 MINISTER/train/MINISTER_00776
0 MINISTER/train/MINISTER_00795
0 MINISTER/train/MINISTER_00805
0 MINISTER/train/MINISTER_00812
0 MINISTER/train/MINISTER_00815
0 MINISTER/train/MINISTER_00820
0 MINISTER/train/MINISTER_00881
0 MINISTER/train/MINISTER_00920
0 MINISTER/train/MINISTER_00994
0 MINISTER/val/MINISTER_00015
0 MINISTER/val/MINISTER_00017
0 MINUTES/test/MINUTES_00013
0 MINUTES/train/MINUTES_00019
0 MINUTES/train/MINUTES_00029
0 MINUTES/train/MINUTES_00037
0 MINUTES/train/MINUTES_00040
0 MINUTES/train/MINUTES_00043
0 MINUTES/train/MINUTES_00066
0 MINUTES/train/MINUTES_00118
0 MINUTES/train/MINUTES_00121
0 MINUTES/train/MINUTES_00124
0 MINUTES/train/MINUTES_00139
0 MINUTES/train/MINUTES_00146
0 MINUTES/train/MINUTES_00170
0 MINUTES/train/MINUTES_00199
0 MINUTES/train/MINUTES_00278
0 MINUTES/train/MINUTES_00280
0 MINUTES/train/MINUTES_00284
0 MINUTES/train/MINUTES_00354
0 MINUTES/train/MINUTES_00402
0 MINUTES/train/MINUTES_00444
0 MINUTES/train/MINUTES_00446
0 MINUTES/train/MINUTES_00457
0 MINUTES/train/MINUTES_00476
0 MINUTES/train/MINUTES_00507
0 MINUTES/train/MINUTES_00531
0 MINUTES/train/MINUTES_00543
0 MINUTES/train/MINUTES_00571
0 MINUTES/train/MINUTES_00711
0 MINUTES/train/MINUTES_00739
0 MINUTES/train/MINUTES_00819
0 MINUTES/train/MINUTES_00963
0 MINUTES/val/MINUTES_00017
0 MISSING/test/MISSING_00004
0 MISSING/test/MISSING_00017
0 MISSING/test/MISSING_00018
0 MISSING/test/MISSING_00030
0 MISSING/train/MISSING_00013
0 MISSING/train/MISSING_00026
0 MISSING/train/MISSING_00046
0 MISSING/train/MISSING_00060
0 MISSING/train/MISSING_00090
0 MISSING/train/MISSING_00111
0 MISSING/train/MISSING_00123
0 MISSING/train/MISSING_00142
0 MISSING/train/MISSING_00147
0 MISSING/train/MISSING_00158
0 MISSING/train/MISSING_00173
0 MISSING/train/MISSING_00235
0 MISSING/train/MISSING_00250
0 MISSING/train/MISSING_00256
0 MISSING/train/MISSING_00262
0 MISSING/train/MISSING_00266
0 MISSING/train/MISSING_00274
0 MISSING/train/MISSING_00282
0 MISSING/train/MISSING_00310
0 MISSING/train/MISSING_00327
0 MISSING/train/MISSING_00331
0 MISSING/train/MISSING_00360
0 MISSING/train/MISSING_00395
0 MISSING/train/MISSING_00407
0 MISSING/train/MISSING_00441
0 MISSING/train/MISSING_00449
0 MISSING/train/MISSING_00453
0 MISSING/train/MISSING_00481
0 MISSING/train/MISSING_00482
0 MISSING/train/MISSING_00497
0 MISSING/train/MISSING_00499
0 MISSING/train/MISSING_00527
0 MISSING/train/MISSING_00585
0 MISSING/train/MISSING_00603
0 MISSING/train/MISSING_00606
0 MISSING/train/MISSING_00612
0 MISSING/train/MISSING_00634
0 MISSING/train/MISSING_00636
0 MISSING/train/MISSING_00655
0 MISSING/train/MISSING_00669
0 MISSING/train/MISSING_00684
0 MISSING/train/MISSING_00711
0 MISSING/train/MISSING_00719
0 MISSING/train/MISSING_00760
0 MISSING/train/MISSING_00764
0 MISSING/train/MISSING_00786
0 MISSING/train/MISSING_00792
0 MISSING/train/MISSING_00803
0 MISSING/train/MISSING_00859
0 MISSING/val/MISSING_00024
0 MOMENT/train/MOMENT_00003
0 MOMENT/train/MOMENT_00011
0 MOMENT/train/MOMENT_00018
0 MOMENT/train/MOMENT_00020
0 MOMENT/train/MOMENT_00119
0 MOMENT/train/MOMENT_00132
0 MOMENT/train/MOMENT_00162
0 MOMENT/train/MOMENT_00181
0 MOMENT/train/MOMENT_00397
0 MOMENT/train/MOMENT_00494
0 MOMENT/train/MOMENT_00570
0 MOMENT/train/MOMENT_00571
0 MOMENT/train/MOMENT_00687
0 MOMENT/train/MOMENT_00826
0 MOMENT/train/MOMENT_00856
0 MOMENT/train/MOMENT_00945
0 MOMENT/train/MOMENT_00971
0 MONEY/test/MONEY_00001
0 MONEY/train/MONEY_00016
0 MONEY/train/MONEY_00025
0 MONEY/train/MONEY_00033
0 MONEY/train/MONEY_00064
0 MONEY/train/MONEY_00089
0 MONEY/train/MONEY_00121
0 MONEY/train/MONEY_00153
0 MONEY/train/MONEY_00397
0 MONEY/train/MONEY_00496
0 MONEY/train/MONEY_00586
0 MONEY/train/MONEY_00674
0 MONEY/train/MONEY_00705
0 MONEY/train/MONEY_00801
0 MONEY/train/MONEY_00906
0 MONTHS/train/MONTHS_00038
0 MONTHS/train/MONTHS_00103
0 MONTHS/train/MONTHS_00106
0 MONTHS/train/MONTHS_00124
0 MONTHS/train/MONTHS_00125
0 MONTHS/train/MONTHS_00127
0 MONTHS/train/MONTHS_00173
0 MONTHS/train/MONTHS_00209
0 MONTHS/train/MONTHS_00230
0 MONTHS/train/MONTHS_00234
0 MONTHS/train/MONTHS_00296
0 MONTHS/train/MONTHS_00341
0 MONTHS/train/MONTHS_00350
0 MONTHS/train/MONTHS_00356
0 MONTHS/train/MONTHS_00358
0 MONTHS/train/MONTHS_00363
0 MONTHS/train/MONTHS_00366
0 MONTHS/train/MONTHS_00400
0 MONTHS/train/MONTHS_00412
0 MONTHS/train/MONTHS_00499
0 MONTHS/train/MONTHS_00530
0 MONTHS/train/MONTHS_00531
0 MONTHS/train/MONTHS_00538
0 MONTHS/train/MONTHS_00581
0 MONTHS/train/MONTHS_00588
0 MONTHS/train/MONTHS_00624
0 MONTHS/train/MONTHS_00625
0 MONTHS/train/MONTHS_00629
0 MONTHS/train/MONTHS_00639
0 MONTHS/train/MONTHS_00642
0 MONTHS/train/MONTHS_00683
0 MONTHS/train/MONTHS_00700
0 MONTHS/train/MONTHS_00742
0 MONTHS/train/MONTHS_00749
0 MONTHS/train/MONTHS_00776
0 MONTHS/train/MONTHS_00783
0 MONTHS/train/MONTHS_00784
0 MONTHS/train/MONTHS_00809
0 MONTHS/train/MONTHS_00815
0 MONTHS/train/MONTHS_00843
0 MONTHS/train/MONTHS_00844
0 MONTHS/train/MONTHS_00866
0 MONTHS/train/MONTHS_00922
0 MONTHS/train/MONTHS_00952
0 MONTHS/train/MONTHS_00998
0 MONTH/test/MONTH_00047
0 MONTH/train/MONTH_00009
0 MONTH/train/MONTH_00031
0 MONTH/train/MONTH_00032
0 MONTH/train/MONTH_00066
0 MONTH/train/MONTH_00068
0 MONTH/train/MONTH_00075
0 MONTH/train/MONTH_00097
0 MONTH/train/MONTH_00099
0 MONTH/train/MONTH_00116
0 MONTH/train/MONTH_00137
0 MONTH/train/MONTH_00145
0 MONTH/train/MONTH_00147
0 MONTH/train/MONTH_00150
0 MONTH/train/MONTH_00211
0 MONTH/train/MONTH_00248
0 MONTH/train/MONTH_00261
0 MONTH/train/MONTH_00303
0 MONTH/train/MONTH_00325
0 MONTH/train/MONTH_00355
0 MONTH/train/MONTH_00363
0 MONTH/train/MONTH_00367
0 MONTH/train/MONTH_00379
0 MONTH/train/MONTH_00385
0 MONTH/train/MONTH_00403
0 MONTH/train/MONTH_00406
0 MONTH/train/MONTH_00442
0 MONTH/train/MONTH_00464
0 MONTH/train/MONTH_00497
0 MONTH/train/MONTH_00507
0 MONTH/train/MONTH_00517
0 MONTH/train/MONTH_00562
0 MONTH/train/MONTH_00577
0 MONTH/train/MONTH_00594
0 MONTH/train/MONTH_00610
0 MONTH/train/MONTH_00619
0 MONTH/train/MONTH_00646
0 MONTH/train/MONTH_00647
0 MONTH/train/MONTH_00650
0 MONTH/train/MONTH_00674
0 MONTH/train/MONTH_00679
0 MONTH/train/MONTH_00690
0 MONTH/train/MONTH_00703
0 MONTH/train/MONTH_00716
0 MONTH/train/MONTH_00740
0 MONTH/train/MONTH_00742
0 MONTH/train/MONTH_00781
0 MONTH/train/MONTH_00791
0 MONTH/train/MONTH_00796
0 MONTH/train/MONTH_00825
0 MONTH/train/MONTH_00856
0 MONTH/train/MONTH_00866
0 MONTH/train/MONTH_00877
0 MONTH/train/MONTH_00922
0 MONTH/train/MONTH_00935
0 MONTH/train/MONTH_00945
0 MONTH/train/MONTH_00948
0 MONTH/train/MONTH_00973
0 MONTH/train/MONTH_00978
0 MONTH/train/MONTH_00980
0 MONTH/train/MONTH_00989
0 MONTH/train/MONTH_00996
0 MONTH/train/MONTH_00998
0 MONTH/train/MONTH_01000
0 MONTH/val/MONTH_00022
0 MONTH/val/MONTH_00029
0 MORNING/test/MORNING_00050
0 MORNING/train/MORNING_00082
0 MORNING/train/MORNING_00093
0 MORNING/train/MORNING_00199
0 MORNING/train/MORNING_00410
0 MORNING/train/MORNING_00796
0 MORNING/train/MORNING_00855
0 MORNING/train/MORNING_00899
0 MORNING/train/MORNING_00909
0 MORNING/train/MORNING_00936
0 MOVING/train/MOVING_00244
0 MOVING/train/MOVING_00249
0 MOVING/train/MOVING_00356
0 MOVING/train/MOVING_00360
0 MOVING/train/MOVING_00362
0 MOVING/train/MOVING_00415
0 MOVING/train/MOVING_00431
0 MOVING/train/MOVING_00614
0 MOVING/train/MOVING_00656
0 MOVING/train/MOVING_00669
0 MOVING/train/MOVING_00696
0 MOVING/train/MOVING_00872
0 MOVING/train/MOVING_00930
0 MOVING/train/MOVING_00957
0 MOVING/val/MOVING_00040
0 MURDER/test/MURDER_00013
0 MURDER/test/MURDER_00017
0 MURDER/test/MURDER_00032
0 MURDER/train/MURDER_00007
0 MURDER/train/MURDER_00009
0 MURDER/train/MURDER_00011
0 MURDER/train/MURDER_00012
0 MURDER/train/MURDER_00014
0 MURDER/train/MURDER_00041
0 MURDER/train/MURDER_00052
0 MURDER/train/MURDER_00058
0 MURDER/train/MURDER_00075
0 MURDER/train/MURDER_00080
0 MURDER/train/MURDER_00081
0 MURDER/train/MURDER_00093
0 MURDER/train/MURDER_00119
0 MURDER/train/MURDER_00121
0 MURDER/train/MURDER_00146
0 MURDER/train/MURDER_00154
0 MURDER/train/MURDER_00157
0 MURDER/train/MURDER_00166
0 MURDER/train/MURDER_00170
0 MURDER/train/MURDER_00177
0 MURDER/train/MURDER_00203
0 MURDER/train/MURDER_00207
0 MURDER/train/MURDER_00208
0 MURDER/train/MURDER_00212
0 MURDER/train/MURDER_00221
0 MURDER/train/MURDER_00227
0 MURDER/train/MURDER_00229
0 MURDER/train/MURDER_00260
0 MURDER/train/MURDER_00264
0 MURDER/train/MURDER_00323
0 MURDER/train/MURDER_00325
0 MURDER/train/MURDER_00328
0 MURDER/train/MURDER_00340
0 MURDER/train/MURDER_00342
0 MURDER/train/MURDER_00364
0 MURDER/train/MURDER_00374
0 MURDER/train/MURDER_00378
0 MURDER/train/MURDER_00389
0 MURDER/train/MURDER_00390
0 MURDER/train/MURDER_00398
0 MURDER/train/MURDER_00441
0 MURDER/train/MURDER_00447
0 MURDER/train/MURDER_00449
0 MURDER/train/MURDER_00452
0 MURDER/train/MURDER_00463
0 MURDER/train/MURDER_00467
0 MURDER/train/MURDER_00469
0 MURDER/train/MURDER_00477
0 MURDER/train/MURDER_00482
0 MURDER/train/MURDER_00491
0 MURDER/train/MURDER_00500
0 MURDER/train/MURDER_00501
0 MURDER/train/MURDER_00511
0 MURDER/train/MURDER_00543
0 MURDER/train/MURDER_00545
0 MURDER/train/MURDER_00552
0 MURDER/train/MURDER_00557
0 MURDER/train/MURDER_00577
0 MURDER/train/MURDER_00588
0 MURDER/train/MURDER_00593
0 MURDER/train/MURDER_00611
0 MURDER/train/MURDER_00614
0 MURDER/train/MURDER_00620
0 MURDER/train/MURDER_00644
0 MURDER/train/MURDER_00652
0 MURDER/train/MURDER_00655
0 MURDER/train/MURDER_00673
0 MURDER/train/MURDER_00691
0 MURDER/train/MURDER_00699
0 MURDER/train/MURDER_00706
0 MURDER/train/MURDER_00732
0 MURDER/train/MURDER_00763
0 MURDER/train/MURDER_00794
0 MURDER/train/MURDER_00818
0 MURDER/train/MURDER_00825
0 MURDER/train/MURDER_00835
0 MURDER/train/MURDER_00843
0 MURDER/train/MURDER_00853
0 MURDER/train/MURDER_00889
0 MURDER/train/MURDER_00905
0 MURDER/train/MURDER_00922
0 MURDER/train/MURDER_00923
0 MURDER/train/MURDER_00936
0 MURDER/train/MURDER_00947
0 MURDER/train/MURDER_00948
0 MURDER/train/MURDER_00951
0 MURDER/train/MURDER_00974
0 MURDER/train/MURDER_00975
0 MURDER/train/MURDER_00999
0 MURDER/val/MURDER_00003
0 MURDER/val/MURDER_00015
0 MURDER/val/MURDER_00017
0 MURDER/val/MURDER_00033
0 MURDER/val/MURDER_00044
0 MURDER/val/MURDER_00050
0 NATIONAL/test/NATIONAL_00005
0 NATIONAL/test/NATIONAL_00018
0 NATIONAL/test/NATIONAL_00027
0 NATIONAL/train/NATIONAL_00013
0 NATIONAL/train/NATIONAL_00027
0 NATIONAL/train/NATIONAL_00047
0 NATIONAL/train/NATIONAL_00087
0 NATIONAL/train/NATIONAL_00096
0 NATIONAL/train/NATIONAL_00102
0 NATIONAL/train/NATIONAL_00122
0 NATIONAL/train/NATIONAL_00142
0 NATIONAL/train/NATIONAL_00176
0 NATIONAL/train/NATIONAL_00200
0 NATIONAL/train/NATIONAL_00216
0 NATIONAL/train/NATIONAL_00228
0 NATIONAL/train/NATIONAL_00275
0 NATIONAL/train/NATIONAL_00287
0 NATIONAL/train/NATIONAL_00324
0 NATIONAL/train/NATIONAL_00332
0 NATIONAL/train/NATIONAL_00341
0 NATIONAL/train/NATIONAL_00381
0 NATIONAL/train/NATIONAL_00392
0 NATIONAL/train/NATIONAL_00438
0 NATIONAL/train/NATIONAL_00442
0 NATIONAL/train/NATIONAL_00443
0 NATIONAL/train/NATIONAL_00449
0 NATIONAL/train/NATIONAL_00493
0 NATIONAL/train/NATIONAL_00522
0 NATIONAL/train/NATIONAL_00523
0 NATIONAL/train/NATIONAL_00536
0 NATIONAL/train/NATIONAL_00545
0 NATIONAL/train/NATIONAL_00553
0 NATIONAL/train/NATIONAL_00579
0 NATIONAL/train/NATIONAL_00594
0 NATIONAL/train/NATIONAL_00597
0 NATIONAL/train/NATIONAL_00607
0 NATIONAL/train/NATIONAL_00617
0 NATIONAL/train/NATIONAL_00633
0 NATIONAL/train/NATIONAL_00724
0 NATIONAL/train/NATIONAL_00757
0 NATIONAL/train/NATIONAL_00804
0 NATIONAL/train/NATIONAL_00853
0 NATIONAL/train/NATIONAL_00898
0 NATIONAL/train/NATIONAL_00910
0 NATIONAL/train/NATIONAL_00925
0 NATIONAL/train/NATIONAL_00929
0 NATIONAL/train/NATIONAL_00944
0 NATIONAL/train/NATIONAL_00952
0 NATIONAL/train/NATIONAL_00965
0 NATIONAL/train/NATIONAL_00983
0 NATIONAL/val/NATIONAL_00032
0 NATIONAL/val/NATIONAL_00039
0 NEEDS/test/NEEDS_00030
0 NEEDS/train/NEEDS_00117
0 NEEDS/train/NEEDS_00119
0 NEEDS/train/NEEDS_00315
0 NEEDS/train/NEEDS_00331
0 NEEDS/train/NEEDS_00369
0 NEEDS/train/NEEDS_00517
0 NEEDS/train/NEEDS_00578
0 NEEDS/train/NEEDS_00648
0 NEEDS/train/NEEDS_00661
0 NEEDS/train/NEEDS_00691
0 NEEDS/train/NEEDS_00727
0 NEEDS/train/NEEDS_00851
0 NEEDS/train/NEEDS_00880
0 NEEDS/val/NEEDS_00003
0 NEEDS/val/NEEDS_00050
0 NEVER/train/NEVER_00164
0 NEVER/train/NEVER_00396
0 NEVER/train/NEVER_00408
0 NEVER/train/NEVER_00439
0 NEVER/train/NEVER_00574
0 NEVER/train/NEVER_00639
0 NEVER/train/NEVER_00705
0 NEVER/train/NEVER_00758
0 NEVER/train/NEVER_00760
0 NEVER/train/NEVER_00874
0 NEVER/train/NEVER_00889
0 NEVER/train/NEVER_00902
0 NIGHT/train/NIGHT_00039
0 NIGHT/train/NIGHT_00103
0 NIGHT/train/NIGHT_00141
0 NIGHT/train/NIGHT_00195
0 NIGHT/train/NIGHT_00222
0 NIGHT/train/NIGHT_00273
0 NIGHT/train/NIGHT_00318
0 NIGHT/train/NIGHT_00396
0 NIGHT/train/NIGHT_00424
0 NIGHT/train/NIGHT_00463
0 NIGHT/train/NIGHT_00470
0 NIGHT/train/NIGHT_00477
0 NIGHT/train/NIGHT_00489
0 NIGHT/train/NIGHT_00587
0 NIGHT/train/NIGHT_00588
0 NIGHT/train/NIGHT_00591
0 NIGHT/train/NIGHT_00672
0 NIGHT/train/NIGHT_00755
0 NIGHT/train/NIGHT_00865
0 NIGHT/train/NIGHT_00881
0 NIGHT/train/NIGHT_00954
0 NIGHT/train/NIGHT_00959
0 NIGHT/train/NIGHT_00973
0 NORTHERN/train/NORTHERN_00060
0 NORTHERN/train/NORTHERN_00115
0 NORTHERN/train/NORTHERN_00185
0 NORTHERN/train/NORTHERN_00201
0 NORTHERN/train/NORTHERN_00247
0 NORTHERN/train/NORTHERN_00349
0 NORTHERN/train/NORTHERN_00359
0 NORTHERN/train/NORTHERN_00360
0 NORTHERN/train/NORTHERN_00465
0 NORTHERN/train/NORTHERN_00484
0 NORTHERN/train/NORTHERN_00489
0 NORTHERN/train/NORTHERN_00534
0 NORTHERN/train/NORTHERN_00545
0 NORTHERN/train/NORTHERN_00583
0 NORTHERN/train/NORTHERN_00584
0 NORTHERN/train/NORTHERN_00690
0 NORTHERN/train/NORTHERN_00717
0 NORTHERN/train/NORTHERN_00724
0 NORTHERN/train/NORTHERN_00790
0 NORTH/test/NORTH_00002
0 NORTH/test/NORTH_00014
0 NORTH/test/NORTH_00042
0 NORTH/train/NORTH_00020
0 NORTH/train/NORTH_00076
0 NORTH/train/NORTH_00084
0 NORTH/train/NORTH_00095
0 NORTH/train/NORTH_00101
0 NORTH/train/NORTH_00162
0 NORTH/train/NORTH_00271
0 NORTH/train/NORTH_00293
0 NORTH/train/NORTH_00303
0 NORTH/train/NORTH_00406
0 NORTH/train/NORTH_00489
0 NORTH/train/NORTH_00619
0 NORTH/train/NORTH_00633
0 NORTH/train/NORTH_00667
0 NORTH/train/NORTH_00767
0 NORTH/train/NORTH_00834
0 NORTH/train/NORTH_00835
0 NORTH/train/NORTH_00857
0 NORTH/train/NORTH_00925
0 NORTH/train/NORTH_00944
0 NORTH/train/NORTH_00945
0 NOTHING/train/NOTHING_00295
0 NOTHING/train/NOTHING_00408
0 NOTHING/train/NOTHING_00485
0 NOTHING/train/NOTHING_00654
0 NOTHING/train/NOTHING_00655
0 NOTHING/train/NOTHING_00729
0 NOTHING/train/NOTHING_00790
0 NOTHING/train/NOTHING_00938
0 NUMBERS/train/NUMBERS_00001
0 NUMBERS/train/NUMBERS_00057
0 NUMBERS/train/NUMBERS_00102
0 NUMBERS/train/NUMBERS_00202
0 NUMBERS/train/NUMBERS_00235
0 NUMBERS/train/NUMBERS_00269
0 NUMBERS/train/NUMBERS_00316
0 NUMBERS/train/NUMBERS_00342
0 NUMBERS/train/NUMBERS_00389
0 NUMBERS/train/NUMBERS_00450
0 NUMBERS/train/NUMBERS_00480
0 NUMBERS/train/NUMBERS_00513
0 NUMBERS/train/NUMBERS_00536
0 NUMBERS/train/NUMBERS_00586
0 NUMBERS/train/NUMBERS_00620
0 NUMBERS/train/NUMBERS_00664
0 NUMBERS/train/NUMBERS_00821
0 NUMBERS/train/NUMBERS_00845
0 NUMBERS/train/NUMBERS_00919
0 NUMBER/test/NUMBER_00026
0 NUMBER/test/NUMBER_00030
0 NUMBER/train/NUMBER_00138
0 NUMBER/train/NUMBER_00206
0 NUMBER/train/NUMBER_00243
0 NUMBER/train/NUMBER_00259
0 NUMBER/train/NUMBER_00288
0 NUMBER/train/NUMBER_00322
0 NUMBER/train/NUMBER_00399
0 NUMBER/train/NUMBER_00413
0 NUMBER/train/NUMBER_00449
0 NUMBER/train/NUMBER_00459
0 NUMBER/train/NUMBER_00469
0 NUMBER/train/NUMBER_00505
0 NUMBER/train/NUMBER_00564
0 NUMBER/train/NUMBER_00581
0 NUMBER/train/NUMBER_00598
0 NUMBER/train/NUMBER_00637
0 NUMBER/train/NUMBER_00707
0 NUMBER/train/NUMBER_00715
0 NUMBER/train/NUMBER_00717
0 NUMBER/train/NUMBER_00782
0 NUMBER/train/NUMBER_00802
0 NUMBER/train/NUMBER_00805
0 NUMBER/train/NUMBER_00828
0 NUMBER/train/NUMBER_00840
0 NUMBER/train/NUMBER_00868
0 NUMBER/train/NUMBER_00869
0 NUMBER/train/NUMBER_00879
0 NUMBER/train/NUMBER_00956
0 NUMBER/val/NUMBER_00026
0 OBAMA/test/OBAMA_00007
0 OBAMA/test/OBAMA_00030
0 OBAMA/test/OBAMA_00049
0 OBAMA/train/OBAMA_00003
0 OBAMA/train/OBAMA_00008
0 OBAMA/train/OBAMA_00044
0 OBAMA/train/OBAMA_00046
0 OBAMA/train/OBAMA_00060
0 OBAMA/train/OBAMA_00085
0 OBAMA/train/OBAMA_00101
0 OBAMA/train/OBAMA_00116
0 OBAMA/train/OBAMA_00133
0 OBAMA/train/OBAMA_00142
0 OBAMA/train/OBAMA_00144
0 OBAMA/train/OBAMA_00148
0 OBAMA/train/OBAMA_00149
0 OBAMA/train/OBAMA_00150
0 OBAMA/train/OBAMA_00156
0 OBAMA/train/OBAMA_00161
0 OBAMA/train/OBAMA_00165
0 OBAMA/train/OBAMA_00223
0 OBAMA/train/OBAMA_00246
0 OBAMA/train/OBAMA_00247
0 OBAMA/train/OBAMA_00250
0 OBAMA/train/OBAMA_00270
0 OBAMA/train/OBAMA_00273
0 OBAMA/train/OBAMA_00278
0 OBAMA/train/OBAMA_00293
0 OBAMA/train/OBAMA_00297
0 OBAMA/train/OBAMA_00301
0 OBAMA/train/OBAMA_00323
0 OBAMA/train/OBAMA_00327
0 OBAMA/train/OBAMA_00328
0 OBAMA/train/OBAMA_00343
0 OBAMA/train/OBAMA_00350
0 OBAMA/train/OBAMA_00372
0 OBAMA/train/OBAMA_00378
0 OBAMA/train/OBAMA_00404
0 OBAMA/train/OBAMA_00406
0 OBAMA/train/OBAMA_00418
0 OBAMA/train/OBAMA_00433
0 OBAMA/train/OBAMA_00436
0 OBAMA/train/OBAMA_00437
0 OBAMA/train/OBAMA_00480
0 OBAMA/train/OBAMA_00501
0 OBAMA/train/OBAMA_00514
0 OBAMA/train/OBAMA_00526
0 OBAMA/train/OBAMA_00533
0 OBAMA/train/OBAMA_00538
0 OBAMA/train/OBAMA_00543
0 OBAMA/train/OBAMA_00560
0 OBAMA/train/OBAMA_00574
0 OBAMA/train/OBAMA_00587
0 OBAMA/train/OBAMA_00599
0 OBAMA/train/OBAMA_00611
0 OBAMA/train/OBAMA_00612
0 OBAMA/train/OBAMA_00614
0 OBAMA/train/OBAMA_00646
0 OBAMA/train/OBAMA_00650
0 OBAMA/train/OBAMA_00661
0 OBAMA/train/OBAMA_00673
0 OBAMA/train/OBAMA_00688
0 OBAMA/train/OBAMA_00690
0 OBAMA/train/OBAMA_00696
0 OBAMA/train/OBAMA_00744
0 OBAMA/train/OBAMA_00748
0 OBAMA/train/OBAMA_00771
0 OBAMA/train/OBAMA_00814
0 OBAMA/train/OBAMA_00838
0 OBAMA/train/OBAMA_00840
0 OBAMA/train/OBAMA_00859
0 OBAMA/train/OBAMA_00860
0 OBAMA/train/OBAMA_00864
0 OBAMA/train/OBAMA_00884
0 OBAMA/train/OBAMA_00891
0 OBAMA/val/OBAMA_00003
0 OBAMA/val/OBAMA_00017
0 OBAMA/val/OBAMA_00024
0 OBAMA/val/OBAMA_00032
0 OBAMA/val/OBAMA_00035
0 OFFICERS/test/OFFICERS_00005
0 OFFICERS/test/OFFICERS_00006
0 OFFICERS/test/OFFICERS_00043
0 OFFICERS/train/OFFICERS_00113
0 OFFICERS/train/OFFICERS_00123
0 OFFICERS/train/OFFICERS_00131
0 OFFICERS/train/OFFICERS_00151
0 OFFICERS/train/OFFICERS_00183
0 OFFICERS/train/OFFICERS_00215
0 OFFICERS/train/OFFICERS_00235
0 OFFICERS/train/OFFICERS_00307
0 OFFICERS/train/OFFICERS_00325
0 OFFICERS/train/OFFICERS_00343
0 OFFICERS/train/OFFICERS_00358
0 OFFICERS/train/OFFICERS_00378
0 OFFICERS/train/OFFICERS_00392
0 OFFICERS/train/OFFICERS_00393
0 OFFICERS/train/OFFICERS_00409
0 OFFICERS/train/OFFICERS_00420
0 OFFICERS/train/OFFICERS_00430
0 OFFICERS/train/OFFICERS_00450
0 OFFICERS/train/OFFICERS_00468
0 OFFICERS/train/OFFICERS_00518
0 OFFICERS/train/OFFICERS_00571
0 OFFICERS/train/OFFICERS_00597
0 OFFICERS/train/OFFICERS_00598
0 OFFICERS/train/OFFICERS_00609
0 OFFICERS/train/OFFICERS_00610
0 OFFICERS/train/OFFICERS_00624
0 OFFICERS/train/OFFICERS_00636
0 OFFICERS/train/OFFICERS_00651
0 OFFICERS/train/OFFICERS_00686
0 OFFICERS/train/OFFICERS_00760
0 OFFICERS/train/OFFICERS_00765
0 OFFICERS/train/OFFICERS_00804
0 OFFICERS/train/OFFICERS_00840
0 OFFICERS/train/OFFICERS_00847
0 OFFICERS/train/OFFICERS_00856
0 OFFICERS/train/OFFICERS_00884
0 OFFICERS/train/OFFICERS_00889
0 OFFICERS/train/OFFICERS_00890
0 OFFICERS/train/OFFICERS_00904
0 OFFICERS/train/OFFICERS_00920
0 OFFICERS/train/OFFICERS_00928
0 OFFICERS/train/OFFICERS_00939
0 OFFICERS/train/OFFICERS_00942
0 OFFICERS/train/OFFICERS_00945
0 OFFICERS/train/OFFICERS_00973
0 OFFICERS/train/OFFICERS_00986
0 OFFICERS/val/OFFICERS_00018
0 OFFICERS/val/OFFICERS_00033
0 OFFICE/train/OFFICE_00010
0 OFFICE/train/OFFICE_00043
0 OFFICE/train/OFFICE_00047
0 OFFICE/train/OFFICE_00051
0 OFFICE/train/OFFICE_00086
0 OFFICE/train/OFFICE_00095
0 OFFICE/train/OFFICE_00113
0 OFFICE/train/OFFICE_00127
0 OFFICE/train/OFFICE_00152
0 OFFICE/train/OFFICE_00176
0 OFFICE/train/OFFICE_00197
0 OFFICE/train/OFFICE_00199
0 OFFICE/train/OFFICE_00202
0 OFFICE/train/OFFICE_00270
0 OFFICE/train/OFFICE_00307
0 OFFICE/train/OFFICE_00374
0 OFFICE/train/OFFICE_00386
0 OFFICE/train/OFFICE_00460
0 OFFICE/train/OFFICE_00486
0 OFFICE/train/OFFICE_00497
0 OFFICE/train/OFFICE_00507
0 OFFICE/train/OFFICE_00530
0 OFFICE/train/OFFICE_00540
0 OFFICE/train/OFFICE_00560
0 OFFICE/train/OFFICE_00571
0 OFFICE/train/OFFICE_00607
0 OFFICE/train/OFFICE_00638
0 OFFICE/train/OFFICE_00642
0 OFFICE/train/OFFICE_00647
0 OFFICE/train/OFFICE_00663
0 OFFICE/train/OFFICE_00697
0 OFFICE/train/OFFICE_00714
0 OFFICE/train/OFFICE_00730
0 OFFICE/train/OFFICE_00739
0 OFFICE/train/OFFICE_00756
0 OFFICE/train/OFFICE_00779
0 OFFICE/train/OFFICE_00783
0 OFFICE/train/OFFICE_00855
0 OFFICE/train/OFFICE_00858
0 OFFICE/train/OFFICE_00878
0 OFFICE/train/OFFICE_00883
0 OFFICE/train/OFFICE_00885
0 OFFICE/train/OFFICE_00895
0 OFFICE/train/OFFICE_00944
0 OFFICE/train/OFFICE_00955
0 OFFICE/train/OFFICE_00958
0 OFFICE/train/OFFICE_00993
0 OFFICE/val/OFFICE_00014
0 OFFICE/val/OFFICE_00040
0 OFFICE/val/OFFICE_00043
0 OFFICIALS/test/OFFICIALS_00007
0 OFFICIALS/test/OFFICIALS_00035
0 OFFICIALS/test/OFFICIALS_00047
0 OFFICIALS/test/OFFICIALS_00049
0 OFFICIALS/train/OFFICIALS_00040
0 OFFICIALS/train/OFFICIALS_00046
0 OFFICIALS/train/OFFICIALS_00053
0 OFFICIALS/train/OFFICIALS_00065
0 OFFICIALS/train/OFFICIALS_00084
0 OFFICIALS/train/OFFICIALS_00110
0 OFFICIALS/train/OFFICIALS_00112
0 OFFICIALS/train/OFFICIALS_00115
0 OFFICIALS/train/OFFICIALS_00149
0 OFFICIALS/train/OFFICIALS_00187
0 OFFICIALS/train/OFFICIALS_00192
0 OFFICIALS/train/OFFICIALS_00201
0 OFFICIALS/train/OFFICIALS_00213
0 OFFICIALS/train/OFFICIALS_00220
0 OFFICIALS/train/OFFICIALS_00253
0 OFFICIALS/train/OFFICIALS_00258
0 OFFICIALS/train/OFFICIALS_00305
0 OFFICIALS/train/OFFICIALS_00311
0 OFFICIALS/train/OFFICIALS_00312
0 OFFICIALS/train/OFFICIALS_00329
0 OFFICIALS/train/OFFICIALS_00336
0 OFFICIALS/train/OFFICIALS_00344
0 OFFICIALS/train/OFFICIALS_00347
0 OFFICIALS/train/OFFICIALS_00359
0 OFFICIALS/train/OFFICIALS_00404
0 OFFICIALS/train/OFFICIALS_00405
0 OFFICIALS/train/OFFICIALS_00430
0 OFFICIALS/train/OFFICIALS_00433
0 OFFICIALS/train/OFFICIALS_00435
0 OFFICIALS/train/OFFICIALS_00437
0 OFFICIALS/train/OFFICIALS_00472
0 OFFICIALS/train/OFFICIALS_00496
0 OFFICIALS/train/OFFICIALS_00503
0 OFFICIALS/train/OFFICIALS_00517
0 OFFICIALS/train/OFFICIALS_00570
0 OFFICIALS/train/OFFICIALS_00577
0 OFFICIALS/train/OFFICIALS_00604
0 OFFICIALS/train/OFFICIALS_00607
0 OFFICIALS/train/OFFICIALS_00616
0 OFFICIALS/train/OFFICIALS_00630
0 OFFICIALS/train/OFFICIALS_00643
0 OFFICIALS/train/OFFICIALS_00658
0 OFFICIALS/train/OFFICIALS_00684
0 OFFICIALS/train/OFFICIALS_00699
0 OFFICIALS/train/OFFICIALS_00718
0 OFFICIALS/train/OFFICIALS_00719
0 OFFICIALS/train/OFFICIALS_00737
0 OFFICIALS/train/OFFICIALS_00751
0 OFFICIALS/train/OFFICIALS_00754
0 OFFICIALS/train/OFFICIALS_00769
0 OFFICIALS/train/OFFICIALS_00810
0 OFFICIALS/train/OFFICIALS_00840
0 OFFICIALS/train/OFFICIALS_00845
0 OFFICIALS/train/OFFICIALS_00860
0 OFFICIALS/train/OFFICIALS_00864
0 OFFICIALS/train/OFFICIALS_00867
0 OFFICIALS/train/OFFICIALS_00942
0 OFFICIALS/train/OFFICIALS_00949
0 OFFICIALS/train/OFFICIALS_00959
0 OFFICIALS/train/OFFICIALS_00962
0 OFFICIALS/val/OFFICIALS_00016
0 OFFICIALS/val/OFFICIALS_00022
0 OFFICIALS/val/OFFICIALS_00030
0 OFFICIALS/val/OFFICIALS_00034
0 OFFICIALS/val/OFFICIALS_00050
0 OFTEN/train/OFTEN_00218
0 OFTEN/train/OFTEN_00225
0 OFTEN/train/OFTEN_00234
0 OFTEN/train/OFTEN_00289
0 OFTEN/train/OFTEN_00338
0 OFTEN/train/OFTEN_00536
0 OFTEN/train/OFTEN_00626
0 OFTEN/train/OFTEN_00692
0 OFTEN/train/OFTEN_00729
0 OPERATION/test/OPERATION_00007
0 OPERATION/train/OPERATION_00008
0 OPERATION/train/OPERATION_00017
0 OPERATION/train/OPERATION_00104
0 OPERATION/train/OPERATION_00149
0 OPERATION/train/OPERATION_00170
0 OPERATION/train/OPERATION_00215
0 OPERATION/train/OPERATION_00233
0 OPERATION/train/OPERATION_00234
0 OPERATION/train/OPERATION_00239
0 OPERATION/train/OPERATION_00255
0 OPERATION/train/OPERATION_00269
0 OPERATION/train/OPERATION_00272
0 OPERATION/train/OPERATION_00310
0 OPERATION/train/OPERATION_00314
0 OPERATION/train/OPERATION_00319
0 OPERATION/train/OPERATION_00340
0 OPERATION/train/OPERATION_00344
0 OPERATION/train/OPERATION_00372
0 OPERATION/train/OPERATION_00378
0 OPERATION/train/OPERATION_00431
0 OPERATION/train/OPERATION_00436
0 OPERATION/train/OPERATION_00451
0 OPERATION/train/OPERATION_00462
0 OPERATION/train/OPERATION_00483
0 OPERATION/train/OPERATION_00501
0 OPERATION/train/OPERATION_00503
0 OPERATION/train/OPERATION_00534
0 OPERATION/train/OPERATION_00584
0 OPERATION/train/OPERATION_00617
0 OPERATION/train/OPERATION_00634
0 OPERATION/train/OPERATION_00655
0 OPERATION/train/OPERATION_00682
0 OPERATION/train/OPERATION_00696
0 OPERATION/train/OPERATION_00704
0 OPERATION/train/OPERATION_00750
0 OPERATION/train/OPERATION_00754
0 OPERATION/train/OPERATION_00812
0 OPERATION/val/OPERATION_00010
0 OPERATION/val/OPERATION_00039
0 OPPOSITION/train/OPPOSITION_00014
0 OPPOSITION/train/OPPOSITION_00025
0 OPPOSITION/train/OPPOSITION_00029
0 OPPOSITION/train/OPPOSITION_00057
0 OPPOSITION/train/OPPOSITION_00097
0 OPPOSITION/train/OPPOSITION_00118
0 OPPOSITION/train/OPPOSITION_00122
0 OPPOSITION/train/OPPOSITION_00126
0 OPPOSITION/train/OPPOSITION_00136
0 OPPOSITION/train/OPPOSITION_00151
0 OPPOSITION/train/OPPOSITION_00162
0 OPPOSITION/train/OPPOSITION_00169
0 OPPOSITION/train/OPPOSITION_00174
0 OPPOSITION/train/OPPOSITION_00185
0 OPPOSITION/train/OPPOSITION_00208
0 OPPOSITION/train/OPPOSITION_00213
0 OPPOSITION/train/OPPOSITION_00233
0 OPPOSITION/train/OPPOSITION_00249
0 OPPOSITION/train/OPPOSITION_00337
0 OPPOSITION/train/OPPOSITION_00373
0 OPPOSITION/train/OPPOSITION_00389
0 OPPOSITION/train/OPPOSITION_00402
0 OPPOSITION/train/OPPOSITION_00455
0 OPPOSITION/train/OPPOSITION_00460
0 OPPOSITION/train/OPPOSITION_00469
0 OPPOSITION/train/OPPOSITION_00524
0 OPPOSITION/train/OPPOSITION_00565
0 OPPOSITION/train/OPPOSITION_00620
0 OPPOSITION/train/OPPOSITION_00634
0 OPPOSITION/train/OPPOSITION_00643
0 OPPOSITION/train/OPPOSITION_00668
0 OPPOSITION/train/OPPOSITION_00671
0 OPPOSITION/train/OPPOSITION_00723
0 OPPOSITION/train/OPPOSITION_00737
0 OPPOSITION/train/OPPOSITION_00755
0 OPPOSITION/train/OPPOSITION_00797
0 OPPOSITION/train/OPPOSITION_00812
0 OPPOSITION/train/OPPOSITION_00828
0 OPPOSITION/val/OPPOSITION_00018
0 OPPOSITION/val/OPPOSITION_00028
0 OPPOSITION/val/OPPOSITION_00048
0 ORDER/train/ORDER_00055
0 ORDER/train/ORDER_00095
0 ORDER/train/ORDER_00104
0 ORDER/train/ORDER_00163
0 ORDER/train/ORDER_00186
0 ORDER/train/ORDER_00189
0 ORDER/train/ORDER_00212
0 ORDER/train/ORDER_00224
0 ORDER/train/ORDER_00240
0 ORDER/train/ORDER_00302
0 ORDER/train/ORDER_00418
0 ORDER/train/ORDER_00486
0 ORDER/train/ORDER_00510
0 ORDER/train/ORDER_00516
0 ORDER/train/ORDER_00541
0 ORDER/train/ORDER_00562
0 ORDER/train/ORDER_00632
0 ORDER/train/ORDER_00642
0 ORDER/val/ORDER_00043
0 OTHERS/test/OTHERS_00021
0 OTHERS/train/OTHERS_00019
0 OTHERS/train/OTHERS_00020
0 OTHERS/train/OTHERS_00046
0 OTHERS/train/OTHERS_00079
0 OTHERS/train/OTHERS_00094
0 OTHERS/train/OTHERS_00174
0 OTHERS/train/OTHERS_00192
0 OTHERS/train/OTHERS_00259
0 OTHERS/train/OTHERS_00284
0 OTHERS/train/OTHERS_00305
0 OTHERS/train/OTHERS_00321
0 OTHERS/train/OTHERS_00375
0 OTHERS/train/OTHERS_00417
0 OTHERS/train/OTHERS_00418
0 OTHERS/train/OTHERS_00472
0 OTHERS/train/OTHERS_00491
0 OTHERS/train/OTHERS_00522
0 OTHERS/train/OTHERS_00563
0 OTHERS/train/OTHERS_00590
0 OTHERS/train/OTHERS_00613
0 OTHERS/train/OTHERS_00703
0 OTHERS/train/OTHERS_00730
0 OTHERS/train/OTHERS_00830
0 OTHERS/train/OTHERS_00844
0 OTHERS/train/OTHERS_00880
0 OTHERS/val/OTHERS_00041
0 OTHERS/val/OTHERS_00044
0 OTHER/train/OTHER_00104
0 OTHER/train/OTHER_00127
0 OTHER/train/OTHER_00159
0 OTHER/train/OTHER_00173
0 OTHER/train/OTHER_00271
0 OTHER/train/OTHER_00297
0 OTHER/train/OTHER_00301
0 OTHER/train/OTHER_00305
0 OTHER/train/OTHER_00317
0 OTHER/train/OTHER_00441
0 OTHER/train/OTHER_00474
0 OTHER/train/OTHER_00485
0 OTHER/train/OTHER_00557
0 OTHER/train/OTHER_00568
0 OTHER/train/OTHER_00652
0 OTHER/train/OTHER_00686
0 OTHER/train/OTHER_00768
0 OTHER/train/OTHER_00781
0 OTHER/train/OTHER_00845
0 OTHER/train/OTHER_00930
0 OTHER/train/OTHER_00954
0 OTHER/train/OTHER_00962
0 OUTSIDE/test/OUTSIDE_00009
0 OUTSIDE/train/OUTSIDE_00004
0 OUTSIDE/train/OUTSIDE_00063
0 OUTSIDE/train/OUTSIDE_00070
0 OUTSIDE/train/OUTSIDE_00075
0 OUTSIDE/train/OUTSIDE_00195
0 OUTSIDE/train/OUTSIDE_00226
0 OUTSIDE/train/OUTSIDE_00328
0 OUTSIDE/train/OUTSIDE_00356
0 OUTSIDE/train/OUTSIDE_00421
0 OUTSIDE/train/OUTSIDE_00422
0 OUTSIDE/train/OUTSIDE_00423
0 OUTSIDE/train/OUTSIDE_00439
0 OUTSIDE/train/OUTSIDE_00470
0 OUTSIDE/train/OUTSIDE_00477
0 OUTSIDE/train/OUTSIDE_00506
0 OUTSIDE/train/OUTSIDE_00537
0 OUTSIDE/train/OUTSIDE_00557
0 OUTSIDE/train/OUTSIDE_00610
0 OUTSIDE/train/OUTSIDE_00647
0 OUTSIDE/train/OUTSIDE_00673
0 OUTSIDE/train/OUTSIDE_00693
0 OUTSIDE/train/OUTSIDE_00743
0 OUTSIDE/train/OUTSIDE_00783
0 OUTSIDE/train/OUTSIDE_00788
0 OUTSIDE/train/OUTSIDE_00851
0 OUTSIDE/train/OUTSIDE_00863
0 OUTSIDE/train/OUTSIDE_00874
0 OUTSIDE/train/OUTSIDE_00882
0 OUTSIDE/train/OUTSIDE_00893
0 OUTSIDE/train/OUTSIDE_00921
0 OUTSIDE/train/OUTSIDE_00925
0 OUTSIDE/train/OUTSIDE_00951
0 OUTSIDE/val/OUTSIDE_00029
0 PARENTS/train/PARENTS_00075
0 PARENTS/train/PARENTS_00117
0 PARENTS/train/PARENTS_00155
0 PARENTS/train/PARENTS_00168
0 PARENTS/train/PARENTS_00177
0 PARENTS/train/PARENTS_00234
0 PARENTS/train/PARENTS_00235
0 PARENTS/train/PARENTS_00270
0 PARENTS/train/PARENTS_00315
0 PARENTS/train/PARENTS_00351
0 PARENTS/train/PARENTS_00393
0 PARENTS/train/PARENTS_00425
0 PARENTS/train/PARENTS_00432
0 PARENTS/train/PARENTS_00434
0 PARENTS/train/PARENTS_00437
0 PARENTS/train/PARENTS_00494
0 PARENTS/train/PARENTS_00546
0 PARENTS/train/PARENTS_00588
0 PARENTS/train/PARENTS_00609
0 PARENTS/train/PARENTS_00612
0 PARENTS/train/PARENTS_00620
0 PARENTS/train/PARENTS_00633
0 PARENTS/train/PARENTS_00643
0 PARENTS/train/PARENTS_00680
0 PARENTS/train/PARENTS_00697
0 PARENTS/train/PARENTS_00762
0 PARENTS/train/PARENTS_00821
0 PARENTS/train/PARENTS_00845
0 PARENTS/train/PARENTS_00884
0 PARENTS/train/PARENTS_00892
0 PARENTS/train/PARENTS_00960
0 PARENTS/train/PARENTS_00996
0 PARENTS/train/PARENTS_01000
0 PARENTS/val/PARENTS_00032
0 PARLIAMENT/test/PARLIAMENT_00013
0 PARLIAMENT/test/PARLIAMENT_00022
0 PARLIAMENT/test/PARLIAMENT_00037
0 PARLIAMENT/test/PARLIAMENT_00046
0 PARLIAMENT/train/PARLIAMENT_00053
0 PARLIAMENT/train/PARLIAMENT_00065
0 PARLIAMENT/train/PARLIAMENT_00107
0 PARLIAMENT/train/PARLIAMENT_00112
0 PARLIAMENT/train/PARLIAMENT_00115
0 PARLIAMENT/train/PARLIAMENT_00161
0 PARLIAMENT/train/PARLIAMENT_00219
0 PARLIAMENT/train/PARLIAMENT_00262
0 PARLIAMENT/train/PARLIAMENT_00275
0 PARLIAMENT/train/PARLIAMENT_00292
0 PARLIAMENT/train/PARLIAMENT_00335
0 PARLIAMENT/train/PARLIAMENT_00339
0 PARLIAMENT/train/PARLIAMENT_00342
0 PARLIAMENT/train/PARLIAMENT_00401
0 PARLIAMENT/train/PARLIAMENT_00475
0 PARLIAMENT/train/PARLIAMENT_00482
0 PARLIAMENT/train/PARLIAMENT_00521
0 PARLIAMENT/train/PARLIAMENT_00533
0 PARLIAMENT/train/PARLIAMENT_00541
0 PARLIAMENT/train/PARLIAMENT_00552
0 PARLIAMENT/train/PARLIAMENT_00585
0 PARLIAMENT/train/PARLIAMENT_00614
0 PARLIAMENT/train/PARLIAMENT_00640
0 PARLIAMENT/train/PARLIAMENT_00660
0 PARLIAMENT/train/PARLIAMENT_00672
0 PARLIAMENT/train/PARLIAMENT_00675
0 PARLIAMENT/train/PARLIAMENT_00715
0 PARLIAMENT/train/PARLIAMENT_00734
0 PARLIAMENT/train/PARLIAMENT_00735
0 PARLIAMENT/train/PARLIAMENT_00827
0 PARLIAMENT/train/PARLIAMENT_00856
0 PARLIAMENT/train/PARLIAMENT_00878
0 PARLIAMENT/train/PARLIAMENT_00894
0 PARLIAMENT/train/PARLIAMENT_00902
0 PARLIAMENT/train/PARLIAMENT_00992
0 PARLIAMENT/train/PARLIAMENT_00999
0 PARLIAMENT/val/PARLIAMENT_00023
0 PARLIAMENT/val/PARLIAMENT_00050
0 PARTIES/train/PARTIES_00040
0 PARTIES/train/PARTIES_00127
0 PARTIES/train/PARTIES_00140
0 PARTIES/train/PARTIES_00180
0 PARTIES/train/PARTIES_00196
0 PARTIES/train/PARTIES_00221
0 PARTIES/train/PARTIES_00252
0 PARTIES/train/PARTIES_00254
0 PARTIES/train/PARTIES_00259
0 PARTIES/train/PARTIES_00321
0 PARTIES/train/PARTIES_00417
0 PARTIES/train/PARTIES_00462
0 PARTIES/train/PARTIES_00564
0 PARTIES/train/PARTIES_00592
0 PARTIES/train/PARTIES_00628
0 PARTIES/train/PARTIES_00641
0 PARTIES/train/PARTIES_00652
0 PARTIES/train/PARTIES_00716
0 PARTIES/train/PARTIES_00719
0 PARTIES/train/PARTIES_00739
0 PARTIES/train/PARTIES_00773
0 PARTIES/train/PARTIES_00790
0 PARTIES/train/PARTIES_00822
0 PARTIES/train/PARTIES_00827
0 PARTIES/train/PARTIES_00883
0 PARTIES/train/PARTIES_00884
0 PARTIES/train/PARTIES_00961
0 PARTIES/train/PARTIES_00975
0 PARTIES/train/PARTIES_00985
0 PARTIES/train/PARTIES_00990
0 PARTIES/val/PARTIES_00033
0 PARTIES/val/PARTIES_00039
0 PARTIES/val/PARTIES_00040
0 PARTS/train/PARTS_00046
0 PARTS/train/PARTS_00118
0 PARTS/train/PARTS_00146
0 PARTS/train/PARTS_00151
0 PARTS/train/PARTS_00176
0 PARTS/train/PARTS_00191
0 PARTS/train/PARTS_00196
0 PARTS/train/PARTS_00229
0 PARTS/train/PARTS_00414
0 PARTS/train/PARTS_00465
0 PARTS/train/PARTS_00466
0 PARTS/train/PARTS_00567
0 PARTS/train/PARTS_00591
0 PARTS/train/PARTS_00648
0 PARTS/train/PARTS_00653
0 PARTS/train/PARTS_00665
0 PARTS/train/PARTS_00666
0 PARTS/train/PARTS_00680
0 PARTS/train/PARTS_00682
0 PARTS/train/PARTS_00693
0 PARTS/train/PARTS_00762
0 PARTS/train/PARTS_00826
0 PARTS/train/PARTS_00918
0 PARTY/train/PARTY_00073
0 PARTY/train/PARTY_00098
0 PARTY/train/PARTY_00124
0 PARTY/train/PARTY_00126
0 PARTY/train/PARTY_00156
0 PARTY/train/PARTY_00165
0 PARTY/train/PARTY_00241
0 PARTY/train/PARTY_00258
0 PARTY/train/PARTY_00292
0 PARTY/train/PARTY_00350
0 PARTY/train/PARTY_00366
0 PARTY/train/PARTY_00387
0 PARTY/train/PARTY_00391
0 PARTY/train/PARTY_00416
0 PARTY/train/PARTY_00444
0 PARTY/train/PARTY_00453
0 PARTY/train/PARTY_00455
0 PARTY/train/PARTY_00476
0 PARTY/train/PARTY_00484
0 PARTY/train/PARTY_00505
0 PARTY/train/PARTY_00530
0 PARTY/train/PARTY_00542
0 PARTY/train/PARTY_00546
0 PARTY/train/PARTY_00607
0 PARTY/train/PARTY_00632
0 PARTY/train/PARTY_00640
0 PARTY/train/PARTY_00654
0 PARTY/train/PARTY_00655
0 PARTY/train/PARTY_00664
0 PARTY/train/PARTY_00697
0 PARTY/train/PARTY_00706
0 PARTY/train/PARTY_00722
0 PARTY/train/PARTY_00731
0 PARTY/train/PARTY_00747
0 PARTY/train/PARTY_00762
0 PARTY/train/PARTY_00764
0 PARTY/train/PARTY_00765
0 PARTY/train/PARTY_00796
0 PARTY/train/PARTY_00798
0 PARTY/train/PARTY_00868
0 PARTY/train/PARTY_00945
0 PARTY/train/PARTY_00997
0 PARTY/val/PARTY_00017
0 PATIENTS/test/PATIENTS_00021
0 PATIENTS/train/PATIENTS_00001
0 PATIENTS/train/PATIENTS_00004
0 PATIENTS/train/PATIENTS_00008
0 PATIENTS/train/PATIENTS_00040
0 PATIENTS/train/PATIENTS_00043
0 PATIENTS/train/PATIENTS_00108
0 PATIENTS/train/PATIENTS_00112
0 PATIENTS/train/PATIENTS_00158
0 PATIENTS/train/PATIENTS_00225
0 PATIENTS/train/PATIENTS_00238
0 PATIENTS/train/PATIENTS_00275
0 PATIENTS/train/PATIENTS_00287
0 PATIENTS/train/PATIENTS_00303
0 PATIENTS/train/PATIENTS_00422
0 PATIENTS/train/PATIENTS_00434
0 PATIENTS/train/PATIENTS_00441
0 PATIENTS/train/PATIENTS_00444
0 PATIENTS/train/PATIENTS_00482
0 PATIENTS/train/PATIENTS_00520
0 PATIENTS/train/PATIENTS_00579
0 PATIENTS/train/PATIENTS_00586
0 PATIENTS/train/PATIENTS_00603
0 PATIENTS/train/PATIENTS_00700
0 PATIENTS/train/PATIENTS_00726
0 PATIENTS/train/PATIENTS_00748
0 PATIENTS/train/PATIENTS_00773
0 PATIENTS/train/PATIENTS_00806
0 PATIENTS/train/PATIENTS_00831
0 PATIENTS/train/PATIENTS_00852
0 PATIENTS/train/PATIENTS_00869
0 PATIENTS/train/PATIENTS_00883
0 PATIENTS/train/PATIENTS_00886
0 PATIENTS/train/PATIENTS_00908
0 PATIENTS/train/PATIENTS_00997
0 PATIENTS/val/PATIENTS_00015
0 PAYING/test/PAYING_00004
0 PAYING/test/PAYING_00041
0 PAYING/test/PAYING_00049
0 PAYING/train/PAYING_00015
0 PAYING/train/PAYING_00025
0 PAYING/train/PAYING_00048
0 PAYING/train/PAYING_00123
0 PAYING/train/PAYING_00135
0 PAYING/train/PAYING_00178
0 PAYING/train/PAYING_00192
0 PAYING/train/PAYING_00262
0 PAYING/train/PAYING_00274
0 PAYING/train/PAYING_00288
0 PAYING/train/PAYING_00531
0 PAYING/train/PAYING_00540
0 PAYING/train/PAYING_00552
0 PAYING/train/PAYING_00574
0 PAYING/train/PAYING_00583
0 PAYING/train/PAYING_00681
0 PAYING/train/PAYING_00707
0 PAYING/train/PAYING_00741
0 PAYING/train/PAYING_00761
0 PAYING/train/PAYING_00766
0 PAYING/train/PAYING_00790
0 PAYING/val/PAYING_00031
0 PEOPLE/test/PEOPLE_00013
0 PEOPLE/train/PEOPLE_00035
0 PEOPLE/train/PEOPLE_00094
0 PEOPLE/train/PEOPLE_00255
0 PEOPLE/train/PEOPLE_00440
0 PEOPLE/train/PEOPLE_00484
0 PEOPLE/train/PEOPLE_00557
0 PEOPLE/train/PEOPLE_00654
0 PEOPLE/train/PEOPLE_00763
0 PEOPLE/train/PEOPLE_00774
0 PEOPLE/train/PEOPLE_00789
0 PEOPLE/train/PEOPLE_00808
0 PEOPLE/train/PEOPLE_00820
0 PEOPLE/train/PEOPLE_00962
0 PEOPLE/val/PEOPLE_00008
0 PEOPLE/val/PEOPLE_00040
0 PERHAPS/train/PERHAPS_00107
0 PERIOD/test/PERIOD_00010
0 PERIOD/test/PERIOD_00034
0 PERIOD/train/PERIOD_00064
0 PERIOD/train/PERIOD_00101
0 PERIOD/train/PERIOD_00132
0 PERIOD/train/PERIOD_00147
0 PERIOD/train/PERIOD_00157
0 PERIOD/train/PERIOD_00226
0 PERIOD/train/PERIOD_00325
0 PERIOD/train/PERIOD_00337
0 PERIOD/train/PERIOD_00362
0 PERIOD/train/PERIOD_00430
0 PERIOD/train/PERIOD_00475
0 PERIOD/train/PERIOD_00487
0 PERIOD/train/PERIOD_00494
0 PERIOD/train/PERIOD_00525
0 PERIOD/train/PERIOD_00539
0 PERIOD/train/PERIOD_00555
0 PERIOD/train/PERIOD_00557
0 PERIOD/train/PERIOD_00568
0 PERIOD/train/PERIOD_00599
0 PERIOD/train/PERIOD_00718
0 PERIOD/train/PERIOD_00792
0 PERIOD/train/PERIOD_00794
0 PERIOD/train/PERIOD_00820
0 PERIOD/train/PERIOD_00831
0 PERIOD/train/PERIOD_00851
0 PERIOD/train/PERIOD_00928
0 PERIOD/val/PERIOD_00004
0 PERSONAL/test/PERSONAL_00017
0 PERSONAL/test/PERSONAL_00049
0 PERSONAL/train/PERSONAL_00014
0 PERSONAL/train/PERSONAL_00062
0 PERSONAL/train/PERSONAL_00063
0 PERSONAL/train/PERSONAL_00069
0 PERSONAL/train/PERSONAL_00121
0 PERSONAL/train/PERSONAL_00128
0 PERSONAL/train/PERSONAL_00135
0 PERSONAL/train/PERSONAL_00156
0 PERSONAL/train/PERSONAL_00241
0 PERSONAL/train/PERSONAL_00318
0 PERSONAL/train/PERSONAL_00336
0 PERSONAL/train/PERSONAL_00381
0 PERSONAL/train/PERSONAL_00478
0 PERSONAL/train/PERSONAL_00506
0 PERSONAL/train/PERSONAL_00534
0 PERSONAL/train/PERSONAL_00560
0 PERSONAL/train/PERSONAL_00571
0 PERSONAL/train/PERSONAL_00581
0 PERSONAL/train/PERSONAL_00584
0 PERSONAL/train/PERSONAL_00602
0 PERSONAL/train/PERSONAL_00622
0 PERSONAL/train/PERSONAL_00695
0 PERSONAL/train/PERSONAL_00762
0 PERSONAL/train/PERSONAL_00777
0 PERSONAL/train/PERSONAL_00786
0 PERSONAL/train/PERSONAL_00805
0 PERSONAL/train/PERSONAL_00809
0 PERSONAL/train/PERSONAL_00813
0 PERSONAL/train/PERSONAL_00839
0 PERSONAL/val/PERSONAL_00049
0 PERSON/train/PERSON_00091
0 PERSON/train/PERSON_00143
0 PERSON/train/PERSON_00226
0 PERSON/train/PERSON_00231
0 PERSON/train/PERSON_00264
0 PERSON/train/PERSON_00386
0 PERSON/train/PERSON_00481
0 PERSON/train/PERSON_00487
0 PERSON/train/PERSON_00512
0 PERSON/train/PERSON_00694
0 PERSON/train/PERSON_00697
0 PERSON/train/PERSON_00745
0 PERSON/train/PERSON_00791
0 PERSON/train/PERSON_00945
0 PERSON/val/PERSON_00017
0 PERSON/val/PERSON_00027
0 PERSON/val/PERSON_00035
0 PHONE/train/PHONE_00005
0 PHONE/train/PHONE_00020
0 PHONE/train/PHONE_00025
0 PHONE/train/PHONE_00053
0 PHONE/train/PHONE_00061
0 PHONE/train/PHONE_00086
0 PHONE/train/PHONE_00089
0 PHONE/train/PHONE_00099
0 PHONE/train/PHONE_00101
0 PHONE/train/PHONE_00117
0 PHONE/train/PHONE_00143
0 PHONE/train/PHONE_00150
0 PHONE/train/PHONE_00152
0 PHONE/train/PHONE_00169
0 PHONE/train/PHONE_00174
0 PHONE/train/PHONE_00179
0 PHONE/train/PHONE_00190
0 PHONE/train/PHONE_00192
0 PHONE/train/PHONE_00246
0 PHONE/train/PHONE_00272
0 PHONE/train/PHONE_00298
0 PHONE/train/PHONE_00323
0 PHONE/train/PHONE_00360
0 PHONE/train/PHONE_00386
0 PHONE/train/PHONE_00393
0 PHONE/train/PHONE_00394
0 PHONE/train/PHONE_00405
0 PHONE/train/PHONE_00430
0 PHONE/train/PHONE_00458
0 PHONE/train/PHONE_00498
0 PHONE/train/PHONE_00501
0 PHONE/train/PHONE_00536
0 PHONE/train/PHONE_00539
0 PHONE/train/PHONE_00565
0 PHONE/train/PHONE_00577
0 PHONE/train/PHONE_00598
0 PHONE/train/PHONE_00606
0 PHONE/train/PHONE_00607
0 PHONE/train/PHONE_00632
0 PHONE/train/PHONE_00659
0 PHONE/train/PHONE_00671
0 PHONE/train/PHONE_00682
0 PHONE/train/PHONE_00687
0 PHONE/train/PHONE_00711
0 PHONE/train/PHONE_00725
0 PHONE/train/PHONE_00729
0 PHONE/train/PHONE_00763
0 PHONE/train/PHONE_00768
0 PHONE/train/PHONE_00801
0 PHONE/train/PHONE_00827
0 PHONE/train/PHONE_00832
0 PHONE/train/PHONE_00840
0 PHONE/train/PHONE_00843
0 PHONE/train/PHONE_00947
0 PHONE/train/PHONE_00954
0 PHONE/train/PHONE_00957
0 PHONE/train/PHONE_00978
0 PLACES/train/PLACES_00136
0 PLACES/train/PLACES_00270
0 PLACES/train/PLACES_00303
0 PLACES/train/PLACES_00553
0 PLACES/train/PLACES_00665
0 PLACES/train/PLACES_00849
0 PLACES/train/PLACES_00893
0 PLACE/test/PLACE_00031
0 PLACE/train/PLACE_00108
0 PLACE/train/PLACE_00109
0 PLACE/train/PLACE_00276
0 PLACE/train/PLACE_00306
0 PLACE/train/PLACE_00329
0 PLACE/train/PLACE_00436
0 PLACE/train/PLACE_00439
0 PLACE/train/PLACE_00518
0 PLACE/train/PLACE_00538
0 PLACE/train/PLACE_00547
0 PLACE/train/PLACE_00557
0 PLACE/train/PLACE_00566
0 PLACE/train/PLACE_00706
0 PLACE/train/PLACE_00755
0 PLACE/train/PLACE_00788
0 PLACE/train/PLACE_00799
0 PLACE/train/PLACE_00814
0 PLACE/train/PLACE_00822
0 PLACE/val/PLACE_00038
0 PLANS/test/PLANS_00003
0 PLANS/test/PLANS_00018
0 PLANS/test/PLANS_00029
0 PLANS/test/PLANS_00039
0 PLANS/train/PLANS_00011
0 PLANS/train/PLANS_00022
0 PLANS/train/PLANS_00033
0 PLANS/train/PLANS_00044
0 PLANS/train/PLANS_00054
0 PLANS/train/PLANS_00064
0 PLANS/train/PLANS_00075
0 PLANS/train/PLANS_00081
0 PLANS/train/PLANS_00097
0 PLANS/train/PLANS_00099
0 PLANS/train/PLANS_00117
0 PLANS/train/PLANS_00128
0 PLANS/train/PLANS_00132
0 PLANS/train/PLANS_00134
0 PLANS/train/PLANS_00139
0 PLANS/train/PLANS_00147
0 PLANS/train/PLANS_00161
0 PLANS/train/PLANS_00168
0 PLANS/train/PLANS_00169
0 PLANS/train/PLANS_00174
0 PLANS/train/PLANS_00185
0 PLANS/train/PLANS_00205
0 PLANS/train/PLANS_00209
0 PLANS/train/PLANS_00215
0 PLANS/train/PLANS_00223
0 PLANS/train/PLANS_00227
0 PLANS/train/PLANS_00234
0 PLANS/train/PLANS_00248
0 PLANS/train/PLANS_00251
0 PLANS/train/PLANS_00256
0 PLANS/train/PLANS_00273
0 PLANS/train/PLANS_00284
0 PLANS/train/PLANS_00290
0 PLANS/train/PLANS_00293
0 PLANS/train/PLANS_00298
0 PLANS/train/PLANS_00302
0 PLANS/train/PLANS_00304
0 PLANS/train/PLANS_00306
0 PLANS/train/PLANS_00308
0 PLANS/train/PLANS_00318
0 PLANS/train/PLANS_00329
0 PLANS/train/PLANS_00330
0 PLANS/train/PLANS_00332
0 PLANS/train/PLANS_00346
0 PLANS/train/PLANS_00349
0 PLANS/train/PLANS_00350
0 PLANS/train/PLANS_00362
0 PLANS/train/PLANS_00372
0 PLANS/train/PLANS_00378
0 PLANS/train/PLANS_00385
0 PLANS/train/PLANS_00388
0 PLANS/train/PLANS_00393
0 PLANS/train/PLANS_00402
0 PLANS/train/PLANS_00416
0 PLANS/train/PLANS_00438
0 PLANS/train/PLANS_00446
0 PLANS/train/PLANS_00449
0 PLANS/train/PLANS_00460
0 PLANS/train/PLANS_00461
0 PLANS/train/PLANS_00476
0 PLANS/train/PLANS_00492
0 PLANS/train/PLANS_00496
0 PLANS/train/PLANS_00507
0 PLANS/train/PLANS_00516
0 PLANS/train/PLANS_00523
0 PLANS/train/PLANS_00526
0 PLANS/train/PLANS_00528
0 PLANS/train/PLANS_00536
0 PLANS/train/PLANS_00542
0 PLANS/train/PLANS_00571
0 PLANS/train/PLANS_00581
0 PLANS/train/PLANS_00583
0 PLANS/train/PLANS_00588
0 PLANS/train/PLANS_00593
0 PLANS/train/PLANS_00597
0 PLANS/train/PLANS_00613
0 PLANS/train/PLANS_00632
0 PLANS/train/PLANS_00640
0 PLANS/train/PLANS_00650
0 PLANS/train/PLANS_00682
0 PLANS/train/PLANS_00720
0 PLANS/train/PLANS_00746
0 PLANS/train/PLANS_00756
0 PLANS/train/PLANS_00768
0 PLANS/train/PLANS_00792
0 PLANS/train/PLANS_00795
0 PLANS/train/PLANS_00806
0 PLANS/train/PLANS_00812
0 PLANS/train/PLANS_00815
0 PLANS/train/PLANS_00817
0 PLANS/train/PLANS_00845
0 PLANS/train/PLANS_00858
0 PLANS/train/PLANS_00866
0 PLANS/train/PLANS_00883
0 PLANS/train/PLANS_00904
0 PLANS/train/PLANS_00908
0 PLANS/train/PLANS_00914
0 PLANS/train/PLANS_00919
0 PLANS/train/PLANS_00930
0 PLANS/train/PLANS_00941
0 PLANS/train/PLANS_00942
0 PLANS/train/PLANS_00964
0 PLANS/train/PLANS_00970
0 PLANS/train/PLANS_00979
0 PLANS/train/PLANS_00988
0 PLANS/val/PLANS_00014
0 PLANS/val/PLANS_00026
0 PLANS/val/PLANS_00036
0 PLANS/val/PLANS_00042
0 PLANS/val/PLANS_00049
0 PLANS/val/PLANS_00050
0 POINT/test/POINT_00021
0 POINT/test/POINT_00041
0 POINT/train/POINT_00075
0 POINT/train/POINT_00128
0 POINT/train/POINT_00196
0 POINT/train/POINT_00603
0 POINT/train/POINT_00670
0 POINT/train/POINT_00678
0 POINT/train/POINT_00777
0 POINT/train/POINT_00798
0 POINT/train/POINT_00910
0 POINT/train/POINT_00983
0 POINT/val/POINT_00040
0 POLICE/test/POLICE_00007
0 POLICE/test/POLICE_00018
0 POLICE/test/POLICE_00045
0 POLICE/train/POLICE_00007
0 POLICE/train/POLICE_00024
0 POLICE/train/POLICE_00074
0 POLICE/train/POLICE_00094
0 POLICE/train/POLICE_00097
0 POLICE/train/POLICE_00148
0 POLICE/train/POLICE_00151
0 POLICE/train/POLICE_00196
0 POLICE/train/POLICE_00198
0 POLICE/train/POLICE_00205
0 POLICE/train/POLICE_00268
0 POLICE/train/POLICE_00302
0 POLICE/train/POLICE_00308
0 POLICE/train/POLICE_00312
0 POLICE/train/POLICE_00313
0 POLICE/train/POLICE_00322
0 POLICE/train/POLICE_00369
0 POLICE/train/POLICE_00371
0 POLICE/train/POLICE_00419
0 POLICE/train/POLICE_00473
0 POLICE/train/POLICE_00490
0 POLICE/train/POLICE_00493
0 POLICE/train/POLICE_00514
0 POLICE/train/POLICE_00547
0 POLICE/train/POLICE_00549
0 POLICE/train/POLICE_00560
0 POLICE/train/POLICE_00597
0 POLICE/train/POLICE_00631
0 POLICE/train/POLICE_00680
0 POLICE/train/POLICE_00705
0 POLICE/train/POLICE_00739
0 POLICE/train/POLICE_00740
0 POLICE/train/POLICE_00778
0 POLICE/train/POLICE_00788
0 POLICE/train/POLICE_00804
0 POLICE/train/POLICE_00848
0 POLICE/train/POLICE_00854
0 POLICE/train/POLICE_00869
0 POLICE/train/POLICE_00945
0 POLICE/train/POLICE_00946
0 POLICE/train/POLICE_00951
0 POLICE/train/POLICE_00969
0 POLICE/train/POLICE_00975
0 POLICE/train/POLICE_00989
0 POLICE/val/POLICE_00015
0 POLICE/val/POLICE_00022
0 POLICE/val/POLICE_00023
0 POLICE/val/POLICE_00038
0 POLICY/train/POLICY_00016
0 POLICY/train/POLICY_00019
0 POLICY/train/POLICY_00036
0 POLICY/train/POLICY_00043
0 POLICY/train/POLICY_00058
0 POLICY/train/POLICY_00073
0 POLICY/train/POLICY_00120
0 POLICY/train/POLICY_00172
0 POLICY/train/POLICY_00189
0 POLICY/train/POLICY_00204
0 POLICY/train/POLICY_00265
0 POLICY/train/POLICY_00283
0 POLICY/train/POLICY_00327
0 POLICY/train/POLICY_00331
0 POLICY/train/POLICY_00341
0 POLICY/train/POLICY_00371
0 POLICY/train/POLICY_00390
0 POLICY/train/POLICY_00393
0 POLICY/train/POLICY_00489
0 POLICY/train/POLICY_00498
0 POLICY/train/POLICY_00500
0 POLICY/train/POLICY_00572
0 POLICY/train/POLICY_00573
0 POLICY/train/POLICY_00593
0 POLICY/train/POLICY_00636
0 POLICY/train/POLICY_00651
0 POLICY/train/POLICY_00685
0 POLICY/train/POLICY_00714
0 POLICY/train/POLICY_00732
0 POLICY/train/POLICY_00738
0 POLICY/train/POLICY_00747
0 POLICY/train/POLICY_00759
0 POLICY/train/POLICY_00794
0 POLICY/train/POLICY_00805
0 POLICY/train/POLICY_00807
0 POLICY/train/POLICY_00837
0 POLICY/train/POLICY_00893
0 POLICY/train/POLICY_00914
0 POLICY/train/POLICY_00994
0 POLICY/val/POLICY_00014
0 POLITICAL/test/POLITICAL_00017
0 POLITICAL/test/POLITICAL_00032
0 POLITICAL/test/POLITICAL_00046
0 POLITICAL/train/POLITICAL_00041
0 POLITICAL/train/POLITICAL_00045
0 POLITICAL/train/POLITICAL_00048
0 POLITICAL/train/POLITICAL_00049
0 POLITICAL/train/POLITICAL_00051
0 POLITICAL/train/POLITICAL_00064
0 POLITICAL/train/POLITICAL_00074
0 POLITICAL/train/POLITICAL_00083
0 POLITICAL/train/POLITICAL_00151
0 POLITICAL/train/POLITICAL_00179
0 POLITICAL/train/POLITICAL_00186
0 POLITICAL/train/POLITICAL_00215
0 POLITICAL/train/POLITICAL_00221
0 POLITICAL/train/POLITICAL_00226
0 POLITICAL/train/POLITICAL_00248
0 POLITICAL/train/POLITICAL_00258
0 POLITICAL/train/POLITICAL_00259
0 POLITICAL/train/POLITICAL_00280
0 POLITICAL/train/POLITICAL_00285
0 POLITICAL/train/POLITICAL_00287
0 POLITICAL/train/POLITICAL_00300
0 POLITICAL/train/POLITICAL_00359
0 POLITICAL/train/POLITICAL_00366
0 POLITICAL/train/POLITICAL_00372
0 POLITICAL/train/POLITICAL_00381
0 POLITICAL/train/POLITICAL_00393
0 POLITICAL/train/POLITICAL_00434
0 POLITICAL/train/POLITICAL_00435
0 POLITICAL/train/POLITICAL_00465
0 POLITICAL/train/POLITICAL_00482
0 POLITICAL/train/POLITICAL_00491
0 POLITICAL/train/POLITICAL_00503
0 POLITICAL/train/POLITICAL_00507
0 POLITICAL/train/POLITICAL_00510
0 POLITICAL/train/POLITICAL_00512
0 POLITICAL/train/POLITICAL_00519
0 POLITICAL/train/POLITICAL_00522
0 POLITICAL/train/POLITICAL_00537
0 POLITICAL/train/POLITICAL_00556
0 POLITICAL/train/POLITICAL_00559
0 POLITICAL/train/POLITICAL_00604
0 POLITICAL/train/POLITICAL_00624
0 POLITICAL/train/POLITICAL_00641
0 POLITICAL/train/POLITICAL_00692
0 POLITICAL/train/POLITICAL_00704
0 POLITICAL/train/POLITICAL_00710
0 POLITICAL/train/POLITICAL_00725
0 POLITICAL/train/POLITICAL_00741
0 POLITICAL/train/POLITICAL_00756
0 POLITICAL/train/POLITICAL_00763
0 POLITICAL/train/POLITICAL_00772
0 POLITICAL/train/POLITICAL_00778
0 POLITICAL/train/POLITICAL_00780
0 POLITICAL/train/POLITICAL_00797
0 POLITICAL/train/POLITICAL_00805
0 POLITICAL/train/POLITICAL_00814
0 POLITICAL/train/POLITICAL_00818
0 POLITICAL/train/POLITICAL_00827
0 POLITICAL/train/POLITICAL_00848
0 POLITICAL/train/POLITICAL_00860
0 POLITICAL/train/POLITICAL_00871
0 POLITICAL/train/POLITICAL_00872
0 POLITICAL/train/POLITICAL_00880
0 POLITICAL/train/POLITICAL_00903
0 POLITICAL/train/POLITICAL_00911
0 POLITICAL/train/POLITICAL_00960
0 POLITICAL/train/POLITICAL_00967
0 POLITICAL/train/POLITICAL_00971
0 POLITICAL/train/POLITICAL_00983
0 POLITICAL/train/POLITICAL_00984
0 POLITICAL/train/POLITICAL_00992
0 POLITICAL/val/POLITICAL_00019
0 POLITICAL/val/POLITICAL_00020
0 POLITICAL/val/POLITICAL_00025
0 POLITICAL/val/POLITICAL_00030
0 POLITICAL/val/POLITICAL_00040
0 POLITICIANS/test/POLITICIANS_00020
0 POLITICIANS/train/POLITICIANS_00012
0 POLITICIANS/train/POLITICIANS_00047
0 POLITICIANS/train/POLITICIANS_00202
0 POLITICIANS/train/POLITICIANS_00351
0 POLITICIANS/train/POLITICIANS_00421
0 POLITICIANS/train/POLITICIANS_00428
0 POLITICIANS/train/POLITICIANS_00539
0 POLITICIANS/train/POLITICIANS_00550
0 POLITICIANS/train/POLITICIANS_00577
0 POLITICIANS/train/POLITICIANS_00614
0 POLITICIANS/train/POLITICIANS_00618
0 POLITICIANS/train/POLITICIANS_00746
0 POLITICIANS/train/POLITICIANS_00769
0 POLITICIANS/train/POLITICIANS_00804
0 POLITICIANS/train/POLITICIANS_00837
0 POLITICIANS/train/POLITICIANS_00928
0 POLITICIANS/train/POLITICIANS_00942
0 POLITICIANS/train/POLITICIANS_00992
0 POLITICIANS/val/POLITICIANS_00001
0 POLITICS/test/POLITICS_00011
0 POLITICS/train/POLITICS_00040
0 POLITICS/train/POLITICS_00204
0 POLITICS/train/POLITICS_00231
0 POLITICS/train/POLITICS_00344
0 POLITICS/train/POLITICS_00493
0 POLITICS/train/POLITICS_00532
0 POLITICS/train/POLITICS_00586
0 POLITICS/train/POLITICS_00643
0 POLITICS/train/POLITICS_00682
0 POLITICS/train/POLITICS_00719
0 POLITICS/train/POLITICS_00780
0 POLITICS/train/POLITICS_00802
0 POLITICS/train/POLITICS_00844
0 POLITICS/val/POLITICS_00004
0 POSITION/test/POSITION_00018
0 POSITION/test/POSITION_00027
0 POSITION/train/POSITION_00035
0 POSITION/train/POSITION_00094
0 POSITION/train/POSITION_00108
0 POSITION/train/POSITION_00182
0 POSITION/train/POSITION_00212
0 POSITION/train/POSITION_00293
0 POSITION/train/POSITION_00301
0 POSITION/train/POSITION_00369
0 POSITION/train/POSITION_00479
0 POSITION/train/POSITION_00489
0 POSITION/train/POSITION_00693
0 POSITION/train/POSITION_00696
0 POSITION/train/POSITION_00732
0 POSITION/train/POSITION_00780
0 POSITION/train/POSITION_00830
0 POSITION/train/POSITION_00865
0 POSITION/train/POSITION_00898
0 POSITION/train/POSITION_00975
0 POSITION/train/POSITION_00982
0 POSITION/val/POSITION_00014
0 POSSIBLE/train/POSSIBLE_00099
0 POSSIBLE/train/POSSIBLE_00132
0 POSSIBLE/train/POSSIBLE_00196
0 POSSIBLE/train/POSSIBLE_00204
0 POSSIBLE/train/POSSIBLE_00228
0 POSSIBLE/train/POSSIBLE_00273
0 POSSIBLE/train/POSSIBLE_00294
0 POSSIBLE/train/POSSIBLE_00327
0 POSSIBLE/train/POSSIBLE_00414
0 POSSIBLE/train/POSSIBLE_00418
0 POSSIBLE/train/POSSIBLE_00493
0 POSSIBLE/train/POSSIBLE_00557
0 POSSIBLE/train/POSSIBLE_00799
0 POSSIBLE/train/POSSIBLE_00812
0 POSSIBLE/train/POSSIBLE_00821
0 POSSIBLE/train/POSSIBLE_00853
0 POSSIBLE/train/POSSIBLE_00886
0 POSSIBLE/train/POSSIBLE_00901
0 POSSIBLE/train/POSSIBLE_00945
0 POSSIBLE/train/POSSIBLE_00960
0 POSSIBLE/val/POSSIBLE_00015
0 POTENTIAL/test/POTENTIAL_00029
0 POTENTIAL/test/POTENTIAL_00043
0 POTENTIAL/train/POTENTIAL_00047
0 POTENTIAL/train/POTENTIAL_00078
0 POTENTIAL/train/POTENTIAL_00103
0 POTENTIAL/train/POTENTIAL_00120
0 POTENTIAL/train/POTENTIAL_00123
0 POTENTIAL/train/POTENTIAL_00167
0 POTENTIAL/train/POTENTIAL_00198
0 POTENTIAL/train/POTENTIAL_00239
0 POTENTIAL/train/POTENTIAL_00247
0 POTENTIAL/train/POTENTIAL_00307
0 POTENTIAL/train/POTENTIAL_00312
0 POTENTIAL/train/POTENTIAL_00352
0 POTENTIAL/train/POTENTIAL_00359
0 POTENTIAL/train/POTENTIAL_00420
0 POTENTIAL/train/POTENTIAL_00466
0 POTENTIAL/train/POTENTIAL_00470
0 POTENTIAL/train/POTENTIAL_00479
0 POTENTIAL/train/POTENTIAL_00493
0 POTENTIAL/train/POTENTIAL_00510
0 POTENTIAL/train/POTENTIAL_00528
0 POTENTIAL/train/POTENTIAL_00533
0 POTENTIAL/train/POTENTIAL_00581
0 POTENTIAL/train/POTENTIAL_00586
0 POTENTIAL/train/POTENTIAL_00615
0 POTENTIAL/train/POTENTIAL_00618
0 POTENTIAL/train/POTENTIAL_00678
0 POTENTIAL/train/POTENTIAL_00682
0 POTENTIAL/train/POTENTIAL_00746
0 POTENTIAL/train/POTENTIAL_00756
0 POTENTIAL/train/POTENTIAL_00760
0 POTENTIAL/train/POTENTIAL_00765
0 POTENTIAL/train/POTENTIAL_00805
0 POTENTIAL/val/POTENTIAL_00033
0 POWERS/test/POWERS_00011
0 POWERS/test/POWERS_00027
0 POWERS/test/POWERS_00030
0 POWERS/train/POWERS_00001
0 POWERS/train/POWERS_00022
0 POWERS/train/POWERS_00035
0 POWERS/train/POWERS_00042
0 POWERS/train/POWERS_00050
0 POWERS/train/POWERS_00052
0 POWERS/train/POWERS_00090
0 POWERS/train/POWERS_00113
0 POWERS/train/POWERS_00117
0 POWERS/train/POWERS_00123
0 POWERS/train/POWERS_00125
0 POWERS/train/POWERS_00156
0 POWERS/train/POWERS_00211
0 POWERS/train/POWERS_00253
0 POWERS/train/POWERS_00261
0 POWERS/train/POWERS_00274
0 POWERS/train/POWERS_00294
0 POWERS/train/POWERS_00332
0 POWERS/train/POWERS_00358
0 POWERS/train/POWERS_00391
0 POWERS/train/POWERS_00397
0 POWERS/train/POWERS_00406
0 POWERS/train/POWERS_00418
0 POWERS/train/POWERS_00423
0 POWERS/train/POWERS_00459
0 POWERS/train/POWERS_00528
0 POWERS/train/POWERS_00531
0 POWERS/train/POWERS_00535
0 POWERS/train/POWERS_00543
0 POWERS/train/POWERS_00587
0 POWERS/train/POWERS_00589
0 POWERS/train/POWERS_00618
0 POWERS/train/POWERS_00643
0 POWERS/train/POWERS_00645
0 POWERS/train/POWERS_00646
0 POWERS/train/POWERS_00673
0 POWERS/train/POWERS_00693
0 POWERS/train/POWERS_00694
0 POWERS/train/POWERS_00695
0 POWERS/train/POWERS_00815
0 POWERS/train/POWERS_00840
0 POWERS/train/POWERS_00843
0 POWERS/train/POWERS_00848
0 POWERS/train/POWERS_00876
0 POWERS/val/POWERS_00035
0 POWERS/val/POWERS_00049
0 POWER/test/POWER_00045
0 POWER/train/POWER_00013
0 POWER/train/POWER_00067
0 POWER/train/POWER_00151
0 POWER/train/POWER_00187
0 POWER/train/POWER_00226
0 POWER/train/POWER_00240
0 POWER/train/POWER_00248
0 POWER/train/POWER_00343
0 POWER/train/POWER_00349
0 POWER/train/POWER_00351
0 POWER/train/POWER_00366
0 POWER/train/POWER_00372
0 POWER/train/POWER_00395
0 POWER/train/POWER_00419
0 POWER/train/POWER_00447
0 POWER/train/POWER_00468
0 POWER/train/POWER_00487
0 POWER/train/POWER_00524
0 POWER/train/POWER_00527
0 POWER/train/POWER_00561
0 POWER/train/POWER_00591
0 POWER/train/POWER_00631
0 POWER/train/POWER_00651
0 POWER/train/POWER_00663
0 POWER/train/POWER_00697
0 POWER/train/POWER_00733
0 POWER/train/POWER_00764
0 POWER/train/POWER_00800
0 POWER/train/POWER_00802
0 POWER/train/POWER_00846
0 POWER/train/POWER_00927
0 POWER/train/POWER_00930
0 POWER/train/POWER_00932
0 POWER/train/POWER_00943
0 POWER/val/POWER_00009
0 POWER/val/POWER_00018
0 POWER/val/POWER_00020
0 POWER/val/POWER_00049
0 PRESIDENT/test/PRESIDENT_00027
0 PRESIDENT/test/PRESIDENT_00035
0 PRESIDENT/test/PRESIDENT_00045
0 PRESIDENT/train/PRESIDENT_00009
0 PRESIDENT/train/PRESIDENT_00012
0 PRESIDENT/train/PRESIDENT_00024
0 PRESIDENT/train/PRESIDENT_00033
0 PRESIDENT/train/PRESIDENT_00038
0 PRESIDENT/train/PRESIDENT_00043
0 PRESIDENT/train/PRESIDENT_00072
0 PRESIDENT/train/PRESIDENT_00088
0 PRESIDENT/train/PRESIDENT_00130
0 PRESIDENT/train/PRESIDENT_00133
0 PRESIDENT/train/PRESIDENT_00151
0 PRESIDENT/train/PRESIDENT_00154
0 PRESIDENT/train/PRESIDENT_00155
0 PRESIDENT/train/PRESIDENT_00160
0 PRESIDENT/train/PRESIDENT_00167
0 PRESIDENT/train/PRESIDENT_00197
0 PRESIDENT/train/PRESIDENT_00203
0 PRESIDENT/train/PRESIDENT_00213
0 PRESIDENT/train/PRESIDENT_00242
0 PRESIDENT/train/PRESIDENT_00280
0 PRESIDENT/train/PRESIDENT_00306
0 PRESIDENT/train/PRESIDENT_00310
0 PRESIDENT/train/PRESIDENT_00315
0 PRESIDENT/train/PRESIDENT_00316
0 PRESIDENT/train/PRESIDENT_00321
0 PRESIDENT/train/PRESIDENT_00344
0 PRESIDENT/train/PRESIDENT_00346
0 PRESIDENT/train/PRESIDENT_00368
0 PRESIDENT/train/PRESIDENT_00374
0 PRESIDENT/train/PRESIDENT_00395
0 PRESIDENT/train/PRESIDENT_00397
0 PRESIDENT/train/PRESIDENT_00402
0 PRESIDENT/train/PRESIDENT_00416
0 PRESIDENT/train/PRESIDENT_00430
0 PRESIDENT/train/PRESIDENT_00483
0 PRESIDENT/train/PRESIDENT_00500
0 PRESIDENT/train/PRESIDENT_00530
0 PRESIDENT/train/PRESIDENT_00551
0 PRESIDENT/train/PRESIDENT_00564
0 PRESIDENT/train/PRESIDENT_00607
0 PRESIDENT/train/PRESIDENT_00614
0 PRESIDENT/train/PRESIDENT_00621
0 PRESIDENT/train/PRESIDENT_00623
0 PRESIDENT/train/PRESIDENT_00628
0 PRESIDENT/train/PRESIDENT_00652
0 PRESIDENT/train/PRESIDENT_00664
0 PRESIDENT/train/PRESIDENT_00665
0 PRESIDENT/train/PRESIDENT_00681
0 PRESIDENT/train/PRESIDENT_00688
0 PRESIDENT/train/PRESIDENT_00689
0 PRESIDENT/train/PRESIDENT_00720
0 PRESIDENT/train/PRESIDENT_00753
0 PRESIDENT/train/PRESIDENT_00786
0 PRESIDENT/train/PRESIDENT_00790
0 PRESIDENT/train/PRESIDENT_00831
0 PRESIDENT/train/PRESIDENT_00835
0 PRESIDENT/train/PRESIDENT_00837
0 PRESIDENT/train/PRESIDENT_00838
0 PRESIDENT/train/PRESIDENT_00872
0 PRESIDENT/train/PRESIDENT_00875
0 PRESIDENT/train/PRESIDENT_00880
0 PRESIDENT/train/PRESIDENT_00908
0 PRESIDENT/train/PRESIDENT_00923
0 PRESIDENT/train/PRESIDENT_00939
0 PRESIDENT/train/PRESIDENT_00958
0 PRESIDENT/train/PRESIDENT_00999
0 PRESIDENT/val/PRESIDENT_00007
0 PRESIDENT/val/PRESIDENT_00036
0 PRESSURE/train/PRESSURE_00019
0 PRESSURE/train/PRESSURE_00044
0 PRESSURE/train/PRESSURE_00051
0 PRESSURE/train/PRESSURE_00060
0 PRESSURE/train/PRESSURE_00142
0 PRESSURE/train/PRESSURE_00168
0 PRESSURE/train/PRESSURE_00184
0 PRESSURE/train/PRESSURE_00187
0 PRESSURE/train/PRESSURE_00224
0 PRESSURE/train/PRESSURE_00344
0 PRESSURE/train/PRESSURE_00357
0 PRESSURE/train/PRESSURE_00379
0 PRESSURE/train/PRESSURE_00441
0 PRESSURE/train/PRESSURE_00474
0 PRESSURE/train/PRESSURE_00531
0 PRESSURE/train/PRESSURE_00544
0 PRESSURE/train/PRESSURE_00551
0 PRESSURE/train/PRESSURE_00629
0 PRESSURE/train/PRESSURE_00675
0 PRESSURE/train/PRESSURE_00685
0 PRESSURE/train/PRESSURE_00781
0 PRESSURE/train/PRESSURE_00810
0 PRESSURE/train/PRESSURE_00861
0 PRESSURE/train/PRESSURE_00944
0 PRESSURE/train/PRESSURE_00967
0 PRESS/test/PRESS_00020
0 PRESS/train/PRESS_00001
0 PRESS/train/PRESS_00011
0 PRESS/train/PRESS_00014
0 PRESS/train/PRESS_00028
0 PRESS/train/PRESS_00059
0 PRESS/train/PRESS_00117
0 PRESS/train/PRESS_00152
0 PRESS/train/PRESS_00191
0 PRESS/train/PRESS_00197
0 PRESS/train/PRESS_00215
0 PRESS/train/PRESS_00221
0 PRESS/train/PRESS_00224
0 PRESS/train/PRESS_00225
0 PRESS/train/PRESS_00239
0 PRESS/train/PRESS_00251
0 PRESS/train/PRESS_00278
0 PRESS/train/PRESS_00296
0 PRESS/train/PRESS_00301
0 PRESS/train/PRESS_00320
0 PRESS/train/PRESS_00337
0 PRESS/train/PRESS_00349
0 PRESS/train/PRESS_00370
0 PRESS/train/PRESS_00380
0 PRESS/train/PRESS_00405
0 PRESS/train/PRESS_00461
0 PRESS/train/PRESS_00475
0 PRESS/train/PRESS_00558
0 PRESS/train/PRESS_00561
0 PRESS/train/PRESS_00569
0 PRESS/train/PRESS_00583
0 PRESS/train/PRESS_00584
0 PRESS/train/PRESS_00653
0 PRESS/train/PRESS_00678
0 PRESS/train/PRESS_00700
0 PRESS/train/PRESS_00702
0 PRESS/train/PRESS_00722
0 PRESS/train/PRESS_00748
0 PRESS/train/PRESS_00767
0 PRESS/train/PRESS_00780
0 PRESS/train/PRESS_00784
0 PRESS/train/PRESS_00822
0 PRESS/train/PRESS_00873
0 PRESS/train/PRESS_00894
0 PRESS/train/PRESS_00912
[truncated: 15,109,343 more chars]
