# Supplementary material
Source: ML conference proceedings conference paper supplement (https://www.ecva.net/papers/eccv_2022/papers_ECCV/html/136960445_ECCV_2022_paper.php)
Supplement: Supplementary file 1 [file 136960445-supp.zip › LRW_val.txt]

4243 BROUGHT/train/BROUGHT_00878
4243 WORKERS/train/WORKERS_00214
4243 ALLOW/train/ALLOW_00342
4243 OPPOSITION/train/OPPOSITION_00275
4243 RATHER/train/RATHER_00125
4243 THIRD/train/THIRD_00807
4243 CLAIMS/train/CLAIMS_00708
4243 GROWTH/train/GROWTH_00720
4243 GROWING/train/GROWING_00551
4243 ENGLAND/train/ENGLAND_00853
4243 DEFICIT/train/DEFICIT_00788
4243 NEVER/train/NEVER_00525
4243 GIVING/train/GIVING_00971
4243 BENEFIT/train/BENEFIT_00285
4243 EDUCATION/train/EDUCATION_00896
4243 AHEAD/train/AHEAD_00629
4243 HEALTH/train/HEALTH_00767
4243 RULES/train/RULES_00009
4243 SERVICE/train/SERVICE_00853
4243 SPEND/train/SPEND_00066
4243 SEVERAL/train/SEVERAL_00862
4243 SPENDING/train/SPENDING_00109
4243 CONFERENCE/train/CONFERENCE_00244
4243 PROVIDE/train/PROVIDE_00484
4243 FRENCH/train/FRENCH_00180
4243 WORST/train/WORST_00167
4243 LIVING/train/LIVING_00182
4243 BENEFIT/train/BENEFIT_00933
4243 DOING/train/DOING_00024
4243 LONGER/train/LONGER_00654
4243 REALLY/train/REALLY_00595
4243 BUILDING/train/BUILDING_00576
4243 DIFFERENT/train/DIFFERENT_00362
4243 PROBLEM/val/PROBLEM_00044
4243 SERIOUS/train/SERIOUS_00764
4243 EVIDENCE/train/EVIDENCE_00850
4243 DIFFICULT/test/DIFFICULT_00008
4243 WHICH/val/WHICH_00029
4243 ECONOMIC/train/ECONOMIC_00089
4243 BUILDING/train/BUILDING_00739
4243 STATEMENT/train/STATEMENT_00544
4243 WEEKS/train/WEEKS_00550
4243 LONGER/train/LONGER_00084
4243 MIGHT/train/MIGHT_00829
4243 START/train/START_00743
4243 SERIOUS/train/SERIOUS_00813
4243 LONGER/train/LONGER_00765
4243 BUSINESSES/train/BUSINESSES_00327
4243 EVERY/train/EVERY_00221
4243 GEORGE/train/GEORGE_00339
4243 BRING/train/BRING_00064
4243 UNION/train/UNION_00990
4243 DECIDED/train/DECIDED_00615
4243 RESULT/train/RESULT_00599
4243 UNITED/test/UNITED_00015
4243 SCHOOL/train/SCHOOL_00359
4243 NEVER/train/NEVER_00828
4243 PLACES/train/PLACES_00502
4243 STARTED/train/STARTED_00062
4243 PROCESS/train/PROCESS_00642
4243 ABOUT/train/ABOUT_00908
4243 ACTUALLY/train/ACTUALLY_00376
4243 EVERYBODY/train/EVERYBODY_00260
4243 ABOUT/train/ABOUT_00403
4243 PEOPLE/train/PEOPLE_00215
4243 SCHOOL/train/SCHOOL_00616
4243 FIGHTING/train/FIGHTING_00361
4243 SHOULD/train/SHOULD_00567
4243 REASON/train/REASON_00724
4243 QUESTION/train/QUESTION_00743
4243 NOTHING/test/NOTHING_00006
4243 COUNTRY/val/COUNTRY_00019
4243 POLITICS/train/POLITICS_00271
4243 PROBABLY/train/PROBABLY_00222
4243 WELFARE/train/WELFARE_00351
4243 QUITE/train/QUITE_00815
4243 FACING/test/FACING_00019
4243 CONFERENCE/train/CONFERENCE_00510
4243 MARKET/train/MARKET_00983
4243 RIGHT/train/RIGHT_00431
4243 POINT/train/POINT_00069
4243 MARKET/train/MARKET_00670
4243 ANNOUNCED/train/ANNOUNCED_00660
4243 IMPORTANT/train/IMPORTANT_00100
4243 DEBATE/train/DEBATE_00695
4243 NATIONAL/train/NATIONAL_00484
4243 STAND/train/STAND_00674
4243 BENEFIT/train/BENEFIT_00471
4243 SERIOUS/train/SERIOUS_00107
4243 INCREASE/train/INCREASE_00436
4243 IMMIGRATION/train/IMMIGRATION_00578
4243 THERE/train/THERE_00010
4243 SERIOUS/train/SERIOUS_00436
4243 MARKET/train/MARKET_00561
4243 RIGHT/train/RIGHT_00974
4243 INVESTMENT/train/INVESTMENT_00288
4243 SOMEONE/train/SOMEONE_00519
4243 THESE/train/THESE_00290
4243 GROWTH/train/GROWTH_00121
4243 PROBABLY/train/PROBABLY_00595
4243 WHERE/train/WHERE_00025
4243 SPENDING/train/SPENDING_00571
4243 VIOLENCE/train/VIOLENCE_00106
4243 SPENDING/train/SPENDING_00342
4243 LEGAL/train/LEGAL_00368
4243 WITHIN/train/WITHIN_00616
4243 DIFFERENCE/train/DIFFERENCE_00781
4243 QUITE/train/QUITE_00130
4243 PROBABLY/train/PROBABLY_00374
4243 HOUSING/train/HOUSING_00223
4243 SEVERAL/train/SEVERAL_00224
4243 WAITING/train/WAITING_00611
4243 WORDS/train/WORDS_00558
4243 START/train/START_00616
4243 ECONOMIC/train/ECONOMIC_00259
4243 HOSPITAL/train/HOSPITAL_00061
4243 CONTROL/train/CONTROL_00081
4243 ACTUALLY/train/ACTUALLY_00959
4243 EXPECT/train/EXPECT_00170
4243 ECONOMIC/train/ECONOMIC_00607
4243 FACING/train/FACING_00127
4243 SERIOUS/train/SERIOUS_00809
4243 MONEY/train/MONEY_00235
4243 PARLIAMENT/train/PARLIAMENT_00644
4243 POLITICS/train/POLITICS_00066
4243 WORKERS/train/WORKERS_00065
4243 TALKING/train/TALKING_00426
4243 AGREEMENT/train/AGREEMENT_00334
4243 RATES/train/RATES_00672
4243 BRITAIN/train/BRITAIN_00173
4243 PARTIES/train/PARTIES_00145
4243 BUILDING/train/BUILDING_00424
4243 COURSE/train/COURSE_00244
4243 EVENTS/train/EVENTS_00378
4243 POLICE/train/POLICE_00043
4243 UNITED/train/UNITED_00661
4243 PRISON/train/PRISON_00653
4243 ALLOW/train/ALLOW_00153
4243 SAYING/train/SAYING_00100
4243 LIVING/train/LIVING_00246
4243 DEFICIT/train/DEFICIT_00443
4243 BENEFIT/train/BENEFIT_00878
4243 FIGURES/train/FIGURES_00043
4243 COUNTRIES/train/COUNTRIES_00443
4243 EUROPEAN/train/EUROPEAN_00448
4243 DOING/train/DOING_00893
4243 POLITICS/train/POLITICS_00846
4243 SERVICE/train/SERVICE_00714
4243 GLOBAL/train/GLOBAL_00076
4243 SEVEN/train/SEVEN_00168
4243 INSIDE/train/INSIDE_00072
4243 AGREEMENT/train/AGREEMENT_00273
4243 PAYING/train/PAYING_00656
4243 BETTER/train/BETTER_00316
4243 YOUNG/train/YOUNG_00671
4243 LONGER/train/LONGER_00892
4243 PROBLEMS/train/PROBLEMS_00947
4243 REASON/train/REASON_00659
4243 STARTED/train/STARTED_00942
4243 GOING/train/GOING_00274
4243 SPEECH/train/SPEECH_00008
4243 LATEST/val/LATEST_00048
4243 REALLY/train/REALLY_00089
4243 CHANCE/train/CHANCE_00722
4243 MAKING/train/MAKING_00411
4243 EVERY/train/EVERY_00103
4243 SERVICES/train/SERVICES_00655
4243 SENSE/train/SENSE_00008
4243 DEFICIT/train/DEFICIT_00636
4243 BENEFIT/train/BENEFIT_00967
4243 ACTUALLY/train/ACTUALLY_00520
4243 WELFARE/train/WELFARE_00560
4243 CRIME/train/CRIME_00506
4243 WESTERN/train/WESTERN_00351
4243 FINANCIAL/train/FINANCIAL_00749
4243 CHANGES/train/CHANGES_00372
4243 BENEFIT/train/BENEFIT_00537
4243 COUNCIL/train/COUNCIL_00927
4243 REASON/train/REASON_00700
4243 DEBATE/train/DEBATE_00498
4243 THOUGHT/train/THOUGHT_00675
4243 EVERYBODY/train/EVERYBODY_00259
4243 MAKES/test/MAKES_00002
4243 ELECTION/train/ELECTION_00503
4243 PUBLIC/train/PUBLIC_00814
4243 RIGHTS/train/RIGHTS_00324
4243 FINANCIAL/val/FINANCIAL_00048
4243 SPEECH/train/SPEECH_00699
4243 CANNOT/train/CANNOT_00668
4243 HEARD/train/HEARD_00793
4243 COUNTRY/train/COUNTRY_00732
4243 TRADE/train/TRADE_00352
4243 SENSE/train/SENSE_00530
4243 RECORD/train/RECORD_00941
4243 CLAIMS/train/CLAIMS_00381
4243 PARTIES/train/PARTIES_00799
4243 LEVEL/train/LEVEL_00147
4243 SCHOOL/train/SCHOOL_00624
4243 GOVERNMENT/test/GOVERNMENT_00020
4243 HOUSE/train/HOUSE_00654
4243 COUNTRIES/train/COUNTRIES_00405
4243 PRISON/train/PRISON_00420
4243 MAJORITY/train/MAJORITY_00942
4243 WANTED/train/WANTED_00975
4243 PLACE/train/PLACE_00229
4243 SOCIETY/train/SOCIETY_00858
4243 GIVEN/train/GIVEN_00942
4243 SECTOR/train/SECTOR_00348
4243 GIVING/train/GIVING_00257
4243 PLACES/train/PLACES_00776
4243 COMMUNITY/train/COMMUNITY_00636
4243 DECIDED/train/DECIDED_00784
4243 MATTER/train/MATTER_00081
4243 CONSERVATIVE/train/CONSERVATIVE_00248
4243 REALLY/test/REALLY_00010
4243 BUILDING/train/BUILDING_00511
4243 POTENTIAL/train/POTENTIAL_00311
4243 FRONT/train/FRONT_00289
4243 BENEFIT/train/BENEFIT_00054
4243 PROBABLY/train/PROBABLY_00144
4243 REASON/train/REASON_00610
4243 PUBLIC/train/PUBLIC_00234
4243 LEVELS/train/LEVELS_00133
4243 PAYING/train/PAYING_00486
4243 SERVICES/train/SERVICES_00865
4243 HUMAN/train/HUMAN_00388
4243 EVERYBODY/train/EVERYBODY_00307
4243 HOUSING/train/HOUSING_00791
4243 CRISIS/val/CRISIS_00003
4243 STAGE/train/STAGE_00934
4243 EXPECT/train/EXPECT_00955
4243 PARLIAMENT/train/PARLIAMENT_00515
4243 NEVER/train/NEVER_00321
4243 CHINA/train/CHINA_00062
4243 THING/train/THING_00938
4243 EUROPEAN/train/EUROPEAN_00611
4243 REASON/train/REASON_00121
4243 WESTERN/train/WESTERN_00200
4243 DECIDED/train/DECIDED_00767
4243 LEAVE/train/LEAVE_00352
4243 REASON/train/REASON_00532
4243 LABOUR/train/LABOUR_00803
4243 REMEMBER/train/REMEMBER_00623
4243 FINANCIAL/val/FINANCIAL_00024
4243 CRISIS/train/CRISIS_00383
4243 BUILD/train/BUILD_00025
4243 SYSTEM/train/SYSTEM_00059
4243 WOMEN/train/WOMEN_00217
4243 SECTOR/train/SECTOR_00568
4243 YEARS/train/YEARS_00105
4243 BENEFIT/train/BENEFIT_00732
4243 MEMBERS/train/MEMBERS_00232
4243 SPENDING/train/SPENDING_00761
4243 BUILD/test/BUILD_00047
4243 MINISTERS/test/MINISTERS_00043
4243 ANYTHING/train/ANYTHING_00184
4243 ANYTHING/train/ANYTHING_00543
4243 SPENDING/train/SPENDING_00916
4243 TALKING/train/TALKING_00609
4243 DIFFERENCE/train/DIFFERENCE_00323
4243 HISTORY/train/HISTORY_00781
4243 COUNTRY/train/COUNTRY_00527
4243 NEVER/train/NEVER_00528
4243 CRIME/train/CRIME_00062
4243 CAPITAL/test/CAPITAL_00009
4243 DEFICIT/train/DEFICIT_00119
4243 AGREE/train/AGREE_00286
4243 ANYTHING/train/ANYTHING_00395
4243 SERVICE/train/SERVICE_00672
4243 PARTIES/train/PARTIES_00877
4243 HEALTH/train/HEALTH_00854
4243 ACROSS/train/ACROSS_00909
4243 GLOBAL/train/GLOBAL_00679
4243 BENEFIT/train/BENEFIT_00167
4243 COURSE/train/COURSE_00949
4243 GIVING/train/GIVING_00052
4243 YEARS/test/YEARS_00049
4243 ALLOWED/train/ALLOWED_00219
4243 SINGLE/train/SINGLE_00288
4243 CHIEF/train/CHIEF_00551
4243 STARTED/train/STARTED_00145
4243 DEFICIT/train/DEFICIT_00035
4243 THOSE/train/THOSE_00819
4243 CRISIS/train/CRISIS_00027
4243 THIRD/train/THIRD_00454
4243 LONDON/train/LONDON_00571
4243 ABOUT/train/ABOUT_00552
4243 SINGLE/train/SINGLE_00942
4243 CHANCE/train/CHANCE_00487
4243 INVOLVED/val/INVOLVED_00001
4243 DIFFICULT/train/DIFFICULT_00480
4243 PRETTY/train/PRETTY_00373
4243 AHEAD/train/AHEAD_00922
4243 LONGER/train/LONGER_00561
4243 PROCESS/train/PROCESS_00867
4243 SOMEONE/train/SOMEONE_00536
4243 START/train/START_00335
4243 ANYTHING/train/ANYTHING_00292
4243 PARTY/train/PARTY_00290
4243 REASON/train/REASON_00541
4243 NATIONAL/train/NATIONAL_00801
4243 BUILDING/train/BUILDING_00009
4243 STARTED/train/STARTED_00541
4243 TRYING/train/TRYING_00960
4243 INDUSTRY/train/INDUSTRY_00873
4243 EXTRA/train/EXTRA_00368
4243 STATES/train/STATES_00874
4243 POLICY/train/POLICY_00205
4243 THOUSANDS/test/THOUSANDS_00040
4243 MINISTER/train/MINISTER_00982
4243 PEOPLE/train/PEOPLE_00055
4243 LABOUR/train/LABOUR_00109
4243 STATES/train/STATES_00686
4243 ALWAYS/train/ALWAYS_00571
4243 HEARD/train/HEARD_00271
4243 POLITICIANS/train/POLITICIANS_00729
4243 AGREEMENT/val/AGREEMENT_00001
4243 EXPECT/train/EXPECT_00068
4243 DOING/train/DOING_00392
4243 MAKING/train/MAKING_00576
4243 SECTOR/train/SECTOR_00714
4243 SIMPLY/train/SIMPLY_00278
4243 EDUCATION/train/EDUCATION_00259
4243 COUNTRY/train/COUNTRY_00435
4243 COMMUNITY/train/COMMUNITY_00139
4243 STRONG/train/STRONG_00472
4243 GUILTY/train/GUILTY_00491
4243 RIGHTS/train/RIGHTS_00814
4243 WORST/train/WORST_00656
4243 REPORT/train/REPORT_00942
4243 GEORGE/train/GEORGE_00772
4243 CRIME/train/CRIME_00574
4243 ACTUALLY/train/ACTUALLY_00176
4243 INTEREST/train/INTEREST_00658
4243 PROBLEM/train/PROBLEM_00928
4243 ACROSS/train/ACROSS_00518
4243 NEEDS/train/NEEDS_00186
4243 POLITICS/train/POLITICS_00768
4243 HAVING/train/HAVING_00446
4243 EVERYBODY/train/EVERYBODY_00515
4243 RESULT/train/RESULT_00105
4243 CLEAR/train/CLEAR_00738
4243 TRYING/train/TRYING_00793
4243 NEEDS/train/NEEDS_00187
4243 EUROPEAN/train/EUROPEAN_00292
4243 WHICH/train/WHICH_00269
4243 SEVERAL/train/SEVERAL_00988
4243 COURSE/train/COURSE_00550
4243 PLACES/train/PLACES_00840
4243 HOUSE/train/HOUSE_00299
4243 SEVERAL/train/SEVERAL_00438
4243 JUDGE/train/JUDGE_00300
4243 CONFERENCE/train/CONFERENCE_00760
4243 PARTIES/train/PARTIES_00086
4243 FORWARD/train/FORWARD_00242
4243 ECONOMIC/train/ECONOMIC_00730
4243 HEALTH/train/HEALTH_00099
4243 BENEFIT/train/BENEFIT_00336
4243 SECTOR/train/SECTOR_00080
4243 ACCUSED/train/ACCUSED_00037
4243 LONGER/train/LONGER_00809
4243 QUITE/train/QUITE_00959
4243 RUNNING/train/RUNNING_00319
4243 TIMES/train/TIMES_00457
4243 RUNNING/train/RUNNING_00620
4243 MARKET/train/MARKET_00085
4243 LEVELS/train/LEVELS_00761
4243 THOUGHT/train/THOUGHT_00214
4243 WANTED/train/WANTED_00633
4243 GUILTY/train/GUILTY_00498
4243 INVESTMENT/train/INVESTMENT_00533
4243 DIFFERENCE/train/DIFFERENCE_00153
4243 AGAINST/train/AGAINST_00907
4243 WESTERN/train/WESTERN_00925
4243 FINANCIAL/train/FINANCIAL_00029
4243 DEFICIT/train/DEFICIT_00127
4243 GREAT/train/GREAT_00052
4243 CASES/train/CASES_00575
4243 FIGHTING/train/FIGHTING_00288
4243 SPEND/train/SPEND_00427
4243 POLITICS/train/POLITICS_00565
4243 GIVING/train/GIVING_00714
4243 GOVERNMENT/train/GOVERNMENT_00070
4243 PROBABLY/train/PROBABLY_00460
4243 BRITISH/train/BRITISH_00087
4243 OPPOSITION/train/OPPOSITION_00580
4243 PARTY/train/PARTY_00761
4243 DEGREES/train/DEGREES_00427
4243 GIVEN/train/GIVEN_00232
4243 BENEFIT/train/BENEFIT_00905
4243 BECAUSE/train/BECAUSE_00431
4243 AGAIN/train/AGAIN_00121
4243 COUNTRY/train/COUNTRY_00920
4243 SERVICE/train/SERVICE_00453
4243 HOUSE/train/HOUSE_00161
4243 BEING/train/BEING_00139
4243 LONGER/train/LONGER_00834
4243 REALLY/train/REALLY_00520
4243 MEASURES/val/MEASURES_00036
4243 THIRD/train/THIRD_00186
4243 ENERGY/train/ENERGY_00628
4243 DIFFERENT/train/DIFFERENT_00312
4243 EVENTS/train/EVENTS_00643
4243 ENOUGH/train/ENOUGH_00497
4243 AHEAD/train/AHEAD_00015
4243 POLITICS/train/POLITICS_00920
4243 INVESTMENT/train/INVESTMENT_00699
4243 COMMUNITY/train/COMMUNITY_00917
4243 SYSTEM/val/SYSTEM_00018
4243 PRIVATE/train/PRIVATE_00145
4243 EXACTLY/train/EXACTLY_00056
4243 ANOTHER/val/ANOTHER_00016
4243 TAKING/train/TAKING_00057
4243 BENEFIT/train/BENEFIT_00085
4243 JUDGE/train/JUDGE_00147
4243 HEALTH/train/HEALTH_00730
4243 WAITING/train/WAITING_00166
4243 MEMBERS/train/MEMBERS_00890
4243 STARTED/train/STARTED_00814
4243 FOCUS/train/FOCUS_00532
4243 DEBATE/train/DEBATE_00845
4243 RESULT/train/RESULT_00926
4243 PROVIDE/train/PROVIDE_00680
4243 REMEMBER/train/REMEMBER_00454
4243 ACTUALLY/train/ACTUALLY_00397
4243 HAPPEN/train/HAPPEN_00401
4243 RULES/train/RULES_00721
4243 OUTSIDE/train/OUTSIDE_00512
4243 THINGS/train/THINGS_00315
4243 THING/train/THING_00994
4243 CLAIMS/train/CLAIMS_00250
4243 JUSTICE/train/JUSTICE_00889
4243 EVERYTHING/train/EVERYTHING_00956
4243 MEDIA/train/MEDIA_00119
4243 MATTER/train/MATTER_00590
4243 DEFICIT/train/DEFICIT_00701
4243 COMING/val/COMING_00004
4243 NEVER/val/NEVER_00027
4243 GIVING/train/GIVING_00811
4243 WORST/train/WORST_00545
4243 TERMS/train/TERMS_00419
4243 EVERYBODY/train/EVERYBODY_00322
4243 GROWTH/train/GROWTH_00591
4243 ALLOWED/train/ALLOWED_00250
4243 DEBATE/train/DEBATE_00358
4243 GREAT/train/GREAT_00970
4243 EVERYBODY/train/EVERYBODY_00076
4243 NEEDS/train/NEEDS_00535
4243 COMMUNITY/test/COMMUNITY_00017
4243 NEEDS/train/NEEDS_00006
4243 POLITICS/train/POLITICS_00021
4243 UNION/train/UNION_00645
4243 WOMEN/train/WOMEN_00277
4243 MAKES/test/MAKES_00038
4243 GREECE/train/GREECE_00943
4243 BUILDING/train/BUILDING_00286
4243 HOSPITAL/train/HOSPITAL_00269
4243 PROCESS/train/PROCESS_00032
4243 SOMEONE/train/SOMEONE_00768
4243 GROWTH/train/GROWTH_00232
4243 DEFICIT/train/DEFICIT_00850
4243 WAITING/train/WAITING_00067
4243 USING/train/USING_00841
4243 SCHOOLS/train/SCHOOLS_00841
4243 ANNOUNCED/train/ANNOUNCED_00154
4243 QUITE/train/QUITE_00356
4243 WRONG/train/WRONG_00727
4243 DEFICIT/train/DEFICIT_00552
4243 BRING/train/BRING_00594
4243 COUNCIL/train/COUNCIL_00438
4243 FUTURE/train/FUTURE_00075
4243 PRISON/train/PRISON_00805
4243 ANNOUNCED/train/ANNOUNCED_00907
4243 BUSINESS/train/BUSINESS_00102
4243 PARTY/train/PARTY_00463
4243 HAPPENING/train/HAPPENING_00247
4243 FORWARD/train/FORWARD_00748
4243 GROWING/train/GROWING_00302
4243 SERVICE/train/SERVICE_00306
4243 PARLIAMENT/train/PARLIAMENT_00404
4243 RATES/train/RATES_00109
4243 STILL/train/STILL_00773
4243 EXACTLY/train/EXACTLY_00067
4243 WORST/train/WORST_00527
4243 POLITICS/train/POLITICS_00296
4243 CONTROL/train/CONTROL_00886
4243 SITUATION/train/SITUATION_00299
4243 CRIME/train/CRIME_00843
4243 POLITICAL/train/POLITICAL_00308
4243 SITUATION/train/SITUATION_00801
4243 START/train/START_00676
4243 COURSE/train/COURSE_00233
4243 MEDICAL/train/MEDICAL_00526
4243 PARTS/train/PARTS_00608
4243 POLITICIANS/train/POLITICIANS_00845
4243 WRONG/train/WRONG_00334
4243 AGREEMENT/train/AGREEMENT_00411
4243 COURT/train/COURT_00961
4243 TAKEN/train/TAKEN_00088
4243 SOMETHING/train/SOMETHING_00242
4243 FINANCIAL/train/FINANCIAL_00236
4243 HEART/train/HEART_00787
4243 PARLIAMENT/test/PARLIAMENT_00031
4243 CLAIMS/train/CLAIMS_00568
4243 HOUSING/train/HOUSING_00301
4243 RULES/train/RULES_00607
4243 HEAVY/train/HEAVY_00506
4243 SITUATION/train/SITUATION_00298
4243 EXACTLY/val/EXACTLY_00029
4243 REASON/train/REASON_00394
4243 CHILDREN/train/CHILDREN_00535
4243 CRIME/train/CRIME_00764
4243 STARTED/train/STARTED_00474
4243 BETTER/train/BETTER_00695
4243 POLITICAL/train/POLITICAL_00333
4243 DESPITE/train/DESPITE_00932
4243 SYSTEM/train/SYSTEM_00745
4243 HAPPENING/train/HAPPENING_00395
4243 DIFFICULT/train/DIFFICULT_00448
4243 NORTHERN/train/NORTHERN_00421
4243 COUNTRY/train/COUNTRY_00568
4243 POLITICS/train/POLITICS_00095
4243 EVERYBODY/train/EVERYBODY_00355
4243 POINT/val/POINT_00020
4243 COMING/train/COMING_00762
4243 WESTERN/train/WESTERN_00405
4243 EVENTS/train/EVENTS_00211
4243 INVESTMENT/train/INVESTMENT_00566
4243 CASES/train/CASES_00215
4243 AUTHORITIES/train/AUTHORITIES_00812
4243 MEETING/train/MEETING_00939
4243 PARLIAMENT/train/PARLIAMENT_00038
4243 TRADE/train/TRADE_00050
4243 COMING/train/COMING_00457
4243 WRONG/train/WRONG_00475
4243 TAKEN/train/TAKEN_00961
4243 POLITICS/train/POLITICS_00291
4243 THOSE/train/THOSE_00379
4243 BUILDING/train/BUILDING_00728
4243 SERVICE/val/SERVICE_00040
4243 FURTHER/train/FURTHER_00661
4243 VICTIMS/train/VICTIMS_00047
4243 GLOBAL/train/GLOBAL_00062
4243 DEFICIT/train/DEFICIT_00643
4243 HEALTH/val/HEALTH_00001
4243 SEVEN/train/SEVEN_00324
4243 DEFICIT/train/DEFICIT_00355
4243 COMING/train/COMING_00054
4243 DIFFERENT/train/DIFFERENT_00488
4243 SEVERAL/train/SEVERAL_00125
4243 BENEFIT/train/BENEFIT_00031
4243 PROBLEMS/train/PROBLEMS_00589
4243 MILLION/train/MILLION_00194
4243 ANYTHING/train/ANYTHING_00131
4243 INTEREST/train/INTEREST_00576
4243 COUNTRY/train/COUNTRY_00880
4243 LEAVE/train/LEAVE_00161
4243 GEORGE/train/GEORGE_00866
4243 SOCIAL/val/SOCIAL_00036
4243 TRADE/train/TRADE_00234
4243 AHEAD/train/AHEAD_00562
4243 EXTRA/train/EXTRA_00210
4243 RIGHT/train/RIGHT_00854
4243 DIFFERENT/train/DIFFERENT_00447
4243 THINK/train/THINK_00052
5125 EDITOR/train/EDITOR_00943
5125 STILL/train/STILL_00384
5125 POSSIBLE/train/POSSIBLE_00301
5125 THOUSANDS/train/THOUSANDS_00423
5125 UNDER/train/UNDER_00518
5125 SIDES/train/SIDES_00128
5125 WHETHER/train/WHETHER_00202
5125 PARTIES/train/PARTIES_00545
5125 ATTACK/train/ATTACK_00993
5125 ALLOWED/train/ALLOWED_00724
5125 FACING/train/FACING_00454
5125 EUROPE/train/EUROPE_00229
5125 PROTECT/train/PROTECT_00207
5125 OTHERS/train/OTHERS_00681
5125 MEANS/train/MEANS_00261
5125 SOUTH/train/SOUTH_00397
5125 COUNTRIES/train/COUNTRIES_00536
5125 CHIEF/train/CHIEF_00114
5125 MILITARY/train/MILITARY_00879
5125 SHORT/train/SHORT_00651
5125 MAJOR/train/MAJOR_00063
5125 PRESSURE/train/PRESSURE_00545
5125 PRIME/train/PRIME_00249
5125 MESSAGE/train/MESSAGE_00373
5125 BILLION/train/BILLION_00125
5125 CAMERON/train/CAMERON_00564
5125 FACING/train/FACING_00062
5125 HOUSE/train/HOUSE_00366
5125 FORMER/train/FORMER_00768
5125 SPEAKING/train/SPEAKING_00060
5125 OBAMA/train/OBAMA_00712
5125 CAPITAL/train/CAPITAL_00152
5125 FAMILY/train/FAMILY_00141
5125 SENIOR/train/SENIOR_00941
5125 EDITOR/train/EDITOR_00024
5125 CHANGE/train/CHANGE_00906
5125 REPORTS/train/REPORTS_00064
5125 WATER/train/WATER_00016
5125 OFFICIALS/train/OFFICIALS_00614
5125 REPORTS/train/REPORTS_00970
5125 BECOME/train/BECOME_00659
5125 NEVER/train/NEVER_00747
5125 SOMETHING/train/SOMETHING_00681
5125 THREAT/train/THREAT_00845
5125 SECURITY/train/SECURITY_00453
5125 FAMILIES/train/FAMILIES_00919
5125 FORCES/train/FORCES_00950
5125 AFFAIRS/train/AFFAIRS_00711
5125 AFRICA/train/AFRICA_00094
5125 MEMBER/train/MEMBER_00043
5125 ABUSE/train/ABUSE_00979
5125 GERMANY/train/GERMANY_00228
5125 WEEKS/train/WEEKS_00212
5125 OPPOSITION/train/OPPOSITION_00804
5125 INSIDE/train/INSIDE_00859
5125 AFRICA/train/AFRICA_00496
5125 CENTRAL/train/CENTRAL_00180
5125 EDITOR/train/EDITOR_00527
5125 PRIME/train/PRIME_00192
5125 BEFORE/train/BEFORE_00750
5125 SIDES/train/SIDES_00554
5125 STAGE/train/STAGE_00634
5125 WHERE/train/WHERE_00384
5125 FOOTBALL/train/FOOTBALL_00506
5125 MONTHS/train/MONTHS_00825
5125 CAMPAIGN/train/CAMPAIGN_00090
5125 SECOND/train/SECOND_00170
5125 CHALLENGE/train/CHALLENGE_00091
5125 OFFICE/train/OFFICE_00877
5125 PHONE/train/PHONE_00287
5125 CALLED/train/CALLED_00066
5125 DESPITE/train/DESPITE_00636
5125 DESCRIBED/train/DESCRIBED_00126
5125 STATES/train/STATES_00852
5125 YOUNG/train/YOUNG_00327
5125 STATE/train/STATE_00705
5125 ACCORDING/train/ACCORDING_00243
5125 VIOLENCE/train/VIOLENCE_00397
5125 GROUP/train/GROUP_00220
5125 ATTACK/train/ATTACK_00219
5125 IMPORTANT/train/IMPORTANT_00997
5125 OPPOSITION/train/OPPOSITION_00629
5125 REPORT/train/REPORT_00959
5125 SYRIAN/train/SYRIAN_00450
5125 ITSELF/train/ITSELF_00654
5125 AFFECTED/train/AFFECTED_00475
5125 COUNTRY/train/COUNTRY_00565
5125 AMERICAN/train/AMERICAN_00161
5125 ACTION/train/ACTION_00935
5125 CLAIMS/train/CLAIMS_00397
5125 FRIDAY/train/FRIDAY_00776
5125 CAMPAIGN/train/CAMPAIGN_00416
5125 SEVEN/train/SEVEN_00212
5125 PRICE/train/PRICE_00134
5125 TODAY/train/TODAY_00334
5125 MURDER/train/MURDER_00143
5125 BRING/train/BRING_00633
5125 RUSSIAN/train/RUSSIAN_00190
5125 GUILTY/train/GUILTY_00546
5125 RUSSIA/train/RUSSIA_00639
5125 FIGHTING/train/FIGHTING_00735
5125 SECRETARY/train/SECRETARY_00487
5125 REPORT/train/REPORT_00185
5125 POWER/train/POWER_00757
5125 FOOTBALL/train/FOOTBALL_00005
5125 SOUTH/train/SOUTH_00376
5125 PRESIDENT/train/PRESIDENT_00223
5125 HOURS/train/HOURS_00462
5125 SYRIA/train/SYRIA_00731
5125 CURRENT/train/CURRENT_00721
5125 PRESIDENT/train/PRESIDENT_00071
5125 SCOTTISH/train/SCOTTISH_00547
5125 HOURS/train/HOURS_00648
5125 CONTROL/train/CONTROL_00516
5125 PRESS/train/PRESS_00536
5125 SUNDAY/train/SUNDAY_00362
5125 STORY/train/STORY_00110
5125 SYRIAN/train/SYRIAN_00508
5125 CAMPAIGN/train/CAMPAIGN_00169
5125 ATTACK/train/ATTACK_00502
5125 PROBLEMS/train/PROBLEMS_00424
5125 FOOTBALL/train/FOOTBALL_00546
5125 TODAY/train/TODAY_00591
5125 WEAPONS/train/WEAPONS_00501
5125 EVENTS/train/EVENTS_00317
5125 CONFLICT/train/CONFLICT_00023
5125 NEVER/train/NEVER_00517
5125 TAKEN/train/TAKEN_00413
5125 SEVERAL/train/SEVERAL_00995
5125 CHIEF/train/CHIEF_00891
5125 MEMBERS/train/MEMBERS_00781
5125 RUNNING/train/RUNNING_00316
5125 SCHOOL/train/SCHOOL_00794
5125 CAMPAIGN/train/CAMPAIGN_00790
5125 POLITICAL/train/POLITICAL_00244
5125 LEADER/train/LEADER_00797
5125 FRONT/train/FRONT_00506
5125 SUNDAY/train/SUNDAY_00305
5125 BIGGEST/train/BIGGEST_00946
5125 PARTIES/train/PARTIES_00766
5125 MISSING/train/MISSING_00286
5125 TALKS/train/TALKS_00072
5125 GERMANY/train/GERMANY_00040
5125 ARRESTED/train/ARRESTED_00793
5125 KILLED/train/KILLED_00917
5125 WORST/train/WORST_00799
5125 EUROPEAN/train/EUROPEAN_00580
5125 OPPOSITION/train/OPPOSITION_00651
5125 WHETHER/train/WHETHER_00542
5125 ECONOMIC/train/ECONOMIC_00847
5125 NOTHING/train/NOTHING_00792
5125 SINCE/train/SINCE_00356
5125 INDEPENDENT/train/INDEPENDENT_00704
5125 AUTHORITIES/train/AUTHORITIES_00159
5125 ACCORDING/train/ACCORDING_00003
5125 STAGE/train/STAGE_00919
5125 INDEPENDENT/train/INDEPENDENT_00370
5125 JAMES/train/JAMES_00346
5125 WEAPONS/train/WEAPONS_00123
5125 GROUND/train/GROUND_00247
5125 THROUGH/train/THROUGH_00059
5125 RUSSIAN/train/RUSSIAN_00753
5125 SINCE/train/SINCE_00868
5125 INQUIRY/train/INQUIRY_00487
5125 ACCUSED/train/ACCUSED_00684
5125 SECRETARY/train/SECRETARY_00743
5125 SYRIAN/train/SYRIAN_00207
5125 TALKS/train/TALKS_00887
5125 MILLION/train/MILLION_00401
5125 CHIEF/train/CHIEF_00318
5125 TEMPERATURES/train/TEMPERATURES_00813
5125 HOURS/train/HOURS_00059
5125 RESULT/train/RESULT_00132
5125 SEVERAL/train/SEVERAL_00987
5125 WORKERS/train/WORKERS_00536
5125 TOWARDS/train/TOWARDS_00380
5125 BEING/train/BEING_00935
5125 DEATH/train/DEATH_00075
5125 ELECTION/train/ELECTION_00766
5125 AFRICA/train/AFRICA_00510
5125 NUMBER/train/NUMBER_00047
5125 REPORT/train/REPORT_00538
5125 THIRD/train/THIRD_00115
5125 HUMAN/train/HUMAN_00373
5125 GIVING/train/GIVING_00185
5125 AUTHORITIES/train/AUTHORITIES_00777
5125 WESTERN/train/WESTERN_00016
5125 MAJOR/train/MAJOR_00991
5125 MARKET/train/MARKET_00465
5125 KNOWN/train/KNOWN_00219
5125 OFFICE/train/OFFICE_00147
5125 PLACES/train/PLACES_00671
5125 OPPOSITION/train/OPPOSITION_00088
5125 PHONE/train/PHONE_00698
5125 FIGHTING/train/FIGHTING_00861
5125 RECENT/train/RECENT_00526
5125 OPPOSITION/train/OPPOSITION_00499
5125 GROUP/train/GROUP_00229
5125 CRISIS/train/CRISIS_00522
5125 GLOBAL/train/GLOBAL_00885
5125 CURRENT/train/CURRENT_00647
5125 CHINA/train/CHINA_00858
5125 RUSSIA/train/RUSSIA_00351
5125 MEMBERS/train/MEMBERS_00828
5125 RUSSIAN/train/RUSSIAN_00953
5125 YEARS/train/YEARS_00344
5125 MINISTER/train/MINISTER_00482
5125 WATCHING/train/WATCHING_00503
5125 FOLLOWING/train/FOLLOWING_00347
5125 CONFLICT/train/CONFLICT_00027
5125 OBAMA/train/OBAMA_00392
5125 BORDER/train/BORDER_00376
5125 FRIDAY/train/FRIDAY_00851
5125 COUNTRY/train/COUNTRY_00844
5125 WHICH/train/WHICH_00854
5125 JUSTICE/train/JUSTICE_00772
5125 BRING/train/BRING_00919
5125 TRIAL/train/TRIAL_00126
5125 SYRIA/train/SYRIA_00886
5125 UNITED/train/UNITED_00431
5125 PRESIDENT/train/PRESIDENT_00536
5125 MILITARY/train/MILITARY_00018
5125 SEVERAL/train/SEVERAL_00518
5125 OFFICIALS/train/OFFICIALS_00592
5125 ENERGY/train/ENERGY_00296
5125 ATTACK/train/ATTACK_00473
5125 FOREIGN/train/FOREIGN_00529
5125 THIRD/train/THIRD_00656
5125 CALLED/train/CALLED_00358
5125 COUNTRIES/train/COUNTRIES_00740
5125 UNITED/train/UNITED_00036
5125 SINGLE/train/SINGLE_00585
5125 AFTER/train/AFTER_00048
5125 WEEKEND/train/WEEKEND_00713
5125 SYRIAN/train/SYRIAN_00036
5125 FORMER/train/FORMER_00011
5125 PARTY/train/PARTY_00188
5125 OFFICIALS/train/OFFICIALS_00195
5125 FOREIGN/train/FOREIGN_00015
5125 STARTED/train/STARTED_00013
5125 ANNOUNCED/train/ANNOUNCED_00547
5125 INDEPENDENT/train/INDEPENDENT_00107
5125 CANCER/train/CANCER_00062
5125 POLICY/train/POLICY_00026
5125 FRIDAY/train/FRIDAY_00401
5125 STAGE/train/STAGE_00153
5125 GROUND/train/GROUND_00981
5125 ALMOST/train/ALMOST_00094
5125 MATTER/train/MATTER_00432
5125 SOUTH/train/SOUTH_00598
5125 TAKEN/train/TAKEN_00161
5125 UNION/train/UNION_00918
5125 WORDS/train/WORDS_00178
5125 OFFICIALS/train/OFFICIALS_00480
5125 AFRICA/train/AFRICA_00392
5125 CLAIMS/train/CLAIMS_00058
5125 MOVING/train/MOVING_00812
5125 FRANCE/train/FRANCE_00321
5125 SUNDAY/train/SUNDAY_00681
5125 RUSSIAN/train/RUSSIAN_00035
5125 WORST/train/WORST_00629
5125 AMERICA/train/AMERICA_00821
5125 STATE/train/STATE_00965
5125 TALKS/train/TALKS_00406
5125 FACING/train/FACING_00777
5125 VIOLENCE/train/VIOLENCE_00090
5125 COMES/train/COMES_00361
5125 LIVES/train/LIVES_00554
5125 ALLEGATIONS/train/ALLEGATIONS_00021
5125 BORDER/train/BORDER_00623
5125 AMERICAN/train/AMERICAN_00097
5125 BRITISH/train/BRITISH_00421
5125 WITHIN/train/WITHIN_00180
5125 INDUSTRY/train/INDUSTRY_00857
5125 MISSING/train/MISSING_00344
5125 PRESIDENT/train/PRESIDENT_00569
5125 SECOND/train/SECOND_00453
5125 RUSSIA/train/RUSSIA_00641
5125 CONFLICT/train/CONFLICT_00001
5125 REMEMBER/train/REMEMBER_00044
5125 SPEAKING/train/SPEAKING_00223
5125 UNDER/train/UNDER_00319
5125 DESCRIBED/train/DESCRIBED_00874
5125 GOVERNMENT/train/GOVERNMENT_00489
5125 PARLIAMENT/train/PARLIAMENT_00900
5125 FRONT/train/FRONT_00302
5125 ACCUSED/train/ACCUSED_00628
5125 PRIME/train/PRIME_00076
5125 MINISTER/train/MINISTER_00015
5125 SPEAKING/train/SPEAKING_00214
5125 ANYTHING/train/ANYTHING_00618
5125 CHINA/train/CHINA_00077
5125 GROUND/train/GROUND_00408
5125 ABUSE/train/ABUSE_00038
5125 LEAST/train/LEAST_00590
5125 CHIEF/train/CHIEF_00077
5125 GERMANY/train/GERMANY_00383
5125 KILLED/train/KILLED_00093
5125 WRONG/train/WRONG_00318
5125 AFTERNOON/train/AFTERNOON_00183
5125 THESE/train/THESE_00079
5125 FIGURES/train/FIGURES_00171
5125 WEEKEND/train/WEEKEND_00351
5125 ACCESS/train/ACCESS_00797
5125 TODAY/train/TODAY_00634
5125 TALKS/train/TALKS_00766
5125 SEVERAL/train/SEVERAL_00285
5125 HEART/train/HEART_00811
5125 GENERAL/train/GENERAL_00189
5125 WHILE/train/WHILE_00464
5125 AGREE/train/AGREE_00883
5125 RUSSIAN/train/RUSSIAN_00418
5125 NEVER/train/NEVER_00726
5125 PERIOD/train/PERIOD_00854
5125 TRIAL/train/TRIAL_00017
5125 WEAPONS/train/WEAPONS_00348
5125 COMES/train/COMES_00329
5125 GOING/train/GOING_00249
5125 GIVEN/train/GIVEN_00186
5125 REFERENDUM/train/REFERENDUM_00675
5125 TALKS/train/TALKS_00588
5125 FOOTBALL/train/FOOTBALL_00638
5125 TALKS/train/TALKS_00104
5125 MEETING/train/MEETING_00332
5125 LATEST/train/LATEST_00440
5125 SAYING/train/SAYING_00820
5125 SYRIA/train/SYRIA_00382
5125 FOLLOWING/train/FOLLOWING_00973
5125 YESTERDAY/train/YESTERDAY_00742
5125 WITHIN/train/WITHIN_00634
5125 EDITOR/train/EDITOR_00400
5125 ANNOUNCED/train/ANNOUNCED_00358
5125 WESTMINSTER/train/WESTMINSTER_00427
5125 LIKELY/train/LIKELY_00902
5125 RECENT/train/RECENT_00023
5125 REFERENDUM/train/REFERENDUM_00458
5125 PERIOD/train/PERIOD_00995
5125 MIDDLE/train/MIDDLE_00876
5125 LATER/train/LATER_00306
5125 BLACK/train/BLACK_00773
5125 TAKING/train/TAKING_00141
5125 ALMOST/train/ALMOST_00628
5125 PRIME/train/PRIME_00292
5125 MEMBER/train/MEMBER_00242
5125 MEASURES/train/MEASURES_00369
5125 AMERICAN/train/AMERICAN_00577
5125 WEATHER/train/WEATHER_00878
5125 GROUP/train/GROUP_00120
5125 AMONG/train/AMONG_00272
5125 MEMBERS/train/MEMBERS_00203
5125 VIOLENCE/train/VIOLENCE_00452
5125 STATES/train/STATES_00429
5125 STATEMENT/train/STATEMENT_00143
5125 AMERICAN/train/AMERICAN_00707
5125 CONFLICT/train/CONFLICT_00259
5125 ASKING/train/ASKING_00097
5125 CHINA/train/CHINA_00908
5125 FINANCIAL/train/FINANCIAL_00505
5125 FRENCH/train/FRENCH_00222
5125 LEGAL/train/LEGAL_00118
5125 GOVERNMENT/train/GOVERNMENT_00189
5125 PRIME/train/PRIME_00158
5125 FIGURES/train/FIGURES_00678
5125 ENOUGH/train/ENOUGH_00541
5125 ATTACK/train/ATTACK_00125
5125 TRIAL/train/TRIAL_00032
5125 SINGLE/train/SINGLE_00975
5125 ALLOW/train/ALLOW_00216
5125 NATIONAL/train/NATIONAL_00431
5125 SUNDAY/train/SUNDAY_00584
5125 FOOTBALL/train/FOOTBALL_00920
5125 DURING/train/DURING_00779
5125 PARTIES/train/PARTIES_00573
5125 SECURITY/train/SECURITY_00742
5125 OUTSIDE/train/OUTSIDE_00903
5125 WAITING/train/WAITING_00401
5125 COUNCIL/train/COUNCIL_00484
5125 WHETHER/train/WHETHER_00680
5125 PRETTY/train/PRETTY_00563
5125 IMPORTANT/train/IMPORTANT_00587
5125 MISSING/train/MISSING_00255
5125 GERMANY/train/GERMANY_00820
5125 ASKED/train/ASKED_00529
5125 MASSIVE/train/MASSIVE_00665
5125 FORCES/train/FORCES_00941
5125 AFRICA/train/AFRICA_00813
5125 JAMES/train/JAMES_00240
5125 GLOBAL/train/GLOBAL_00445
5125 AGREEMENT/train/AGREEMENT_00698
5125 COMES/train/COMES_00401
5125 SYRIAN/train/SYRIAN_00779
5125 MOMENT/train/MOMENT_00796
5125 FIGHTING/train/FIGHTING_00160
5125 HOMES/train/HOMES_00611
5125 SYRIAN/train/SYRIAN_00408
5125 LOCAL/train/LOCAL_00851
5125 INCREASE/train/INCREASE_00171
5125 TALKS/train/TALKS_00070
5125 STATE/train/STATE_00105
5125 BROUGHT/train/BROUGHT_00886
5125 UNDER/train/UNDER_00230
5125 SEVERAL/train/SEVERAL_00792
5125 GLOBAL/train/GLOBAL_00079
5125 CHINA/train/CHINA_00647
5125 EUROPEAN/train/EUROPEAN_00454
5125 CAMPAIGN/train/CAMPAIGN_00584
5125 FRONT/train/FRONT_00183
5125 MURDER/train/MURDER_00953
5125 LIVING/train/LIVING_00697
5125 THEIR/train/THEIR_00986
5125 DURING/train/DURING_00891
5125 TALKS/train/TALKS_00611
5125 SITUATION/train/SITUATION_00227
5125 VICTIMS/train/VICTIMS_00462
5125 GUILTY/train/GUILTY_00060
5125 GLOBAL/train/GLOBAL_00366
5125 LEADER/train/LEADER_00520
5125 SUNDAY/train/SUNDAY_00424
5125 SPENDING/train/SPENDING_00587
5125 CHILD/train/CHILD_00208
5125 TODAY/train/TODAY_00176
5125 COMES/train/COMES_00533
5125 MISSING/train/MISSING_00110
5125 COUPLE/train/COUPLE_00228
5125 PERSONAL/train/PERSONAL_00787
5125 PRISON/train/PRISON_00093
5125 OTHER/train/OTHER_00152
5125 MISSING/train/MISSING_00296
5125 DAVID/train/DAVID_00420
5125 GOVERNMENT/train/GOVERNMENT_00519
5125 MONTH/train/MONTH_00020
5125 WEATHER/train/WEATHER_00127
5125 FUTURE/train/FUTURE_00816
5125 OPERATION/train/OPERATION_00181
5125 WEEKS/train/WEEKS_00422
5125 ALWAYS/train/ALWAYS_00019
5125 MOMENT/train/MOMENT_00818
5125 AFFAIRS/train/AFFAIRS_00884
5125 REPORTS/train/REPORTS_00103
5125 FOUND/train/FOUND_00158
5125 MEMBERS/train/MEMBERS_00936
5125 WORST/train/WORST_00549
5125 POWERS/train/POWERS_00254
5125 EXACTLY/train/EXACTLY_00698
5125 GOVERNMENT/train/GOVERNMENT_00087
5125 UNITED/train/UNITED_00713
5125 OFFICIALS/train/OFFICIALS_00596
5125 DOING/train/DOING_00647
5125 BRING/train/BRING_00907
5125 AFRICA/train/AFRICA_00462
5125 STATE/train/STATE_00825
5125 CHILDREN/train/CHILDREN_00352
5125 LARGE/train/LARGE_00633
5125 VIOLENCE/train/VIOLENCE_00591
5125 GROWTH/train/GROWTH_00115
5125 KNOWN/train/KNOWN_00061
5125 DESPITE/train/DESPITE_00608
5125 BLACK/train/BLACK_00826
5125 BEHIND/train/BEHIND_00356
5125 EVERY/train/EVERY_00131
5125 CURRENT/train/CURRENT_00235
5125 TODAY/train/TODAY_00776
5125 EUROPE/train/EUROPE_00926
5125 GETTING/train/GETTING_00114
5125 MESSAGE/train/MESSAGE_00706
5125 PROCESS/train/PROCESS_00268
5125 THREAT/train/THREAT_00705
5125 LONDON/train/LONDON_00401
5125 WEEKEND/train/WEEKEND_00703
5125 THEIR/train/THEIR_00611
5125 UNTIL/train/UNTIL_00659
5125 STRONG/train/STRONG_00040
5125 REPORT/train/REPORT_00511
5125 BRITISH/train/BRITISH_00956
5125 FINAL/train/FINAL_00982
5125 EVERY/train/EVERY_00061
5125 SYRIAN/train/SYRIAN_00124
5125 OTHER/train/OTHER_00611
5125 CHANGE/train/CHANGE_00980
5125 TALKING/train/TALKING_00349
5125 RUSSIA/train/RUSSIA_00628
5125 MILLIONS/train/MILLIONS_00469
5125 GERMANY/train/GERMANY_00947
5125 PROBLEMS/train/PROBLEMS_00646
5125 MAJORITY/train/MAJORITY_00211
5125 DESCRIBED/train/DESCRIBED_00877
5125 TODAY/train/TODAY_00245
5125 USING/train/USING_00884
5125 ELECTION/train/ELECTION_00266
5125 EDITOR/train/EDITOR_00680
5125 SUNDAY/train/SUNDAY_00028
5125 ACCESS/train/ACCESS_00381
5125 SEVEN/train/SEVEN_00736
5125 ASKING/train/ASKING_00082
5125 LEVEL/train/LEVEL_00045
5125 CAPITAL/train/CAPITAL_00942
5125 PRISON/train/PRISON_00551
5125 FOLLOWING/train/FOLLOWING_00596
5125 VIOLENCE/train/VIOLENCE_00412
5125 TODAY/train/TODAY_00754
5125 FRANCE/train/FRANCE_00801
5125 RIGHTS/train/RIGHTS_00242
5125 OUTSIDE/train/OUTSIDE_00592
5125 FOOTBALL/train/FOOTBALL_00518
5125 COURSE/train/COURSE_00432
5125 CLEAR/train/CLEAR_00761
5125 FOREIGN/train/FOREIGN_00207
5125 AUTHORITIES/train/AUTHORITIES_00900
5125 BETWEEN/train/BETWEEN_00948
5125 NEVER/train/NEVER_00285
5125 ANOTHER/train/ANOTHER_00754
5125 LIVES/train/LIVES_00750
5125 BORDER/train/BORDER_00932
5125 GOVERNMENT/train/GOVERNMENT_00408
5125 WARNING/train/WARNING_00112
5125 FORMER/train/FORMER_00839
5125 REPORT/train/REPORT_00566
5125 DECIDED/train/DECIDED_00600
5125 OBAMA/train/OBAMA_00037
5125 FOLLOWING/train/FOLLOWING_00152
5125 THOUSANDS/train/THOUSANDS_00656
5125 SUNDAY/train/SUNDAY_00598
5125 VIOLENCE/train/VIOLENCE_00996
5125 MILLIONS/train/MILLIONS_00440
5125 CHALLENGE/train/CHALLENGE_00098
5125 DESCRIBED/train/DESCRIBED_00973
5125 MARKET/train/MARKET_00019
5125 AFRICA/train/AFRICA_00927
5125 BORDER/train/BORDER_00731
5125 LEAST/train/LEAST_00466
5125 HUNDREDS/train/HUNDREDS_00197
5125 GUILTY/train/GUILTY_00003
5125 OFFICIALS/train/OFFICIALS_00478
5125 OBAMA/train/OBAMA_00238
5125 SOUTH/train/SOUTH_00266
5125 FOLLOWING/train/FOLLOWING_00992
5125 HUMAN/train/HUMAN_00088
5125 GERMANY/train/GERMANY_00363
5125 MOMENT/train/MOMENT_00189
5125 HUNDREDS/train/HUNDREDS_00389
5125 START/train/START_00382
5125 TALKS/train/TALKS_00495
5125 TALKS/train/TALKS_00583
5125 TALKS/train/TALKS_00368
5125 LARGE/train/LARGE_00908
5125 CONTINUE/train/CONTINUE_00300
5125 TALKS/train/TALKS_00677
5125 UNDER/train/UNDER_00573
5125 CAPITAL/train/CAPITAL_00170
5125 AGREEMENT/train/AGREEMENT_00254
5125 FINANCIAL/train/FINANCIAL_00113
5125 ASKING/train/ASKING_00511
5125 ATTACK/train/ATTACK_00791
5125 MILLIONS/train/MILLIONS_00323
5125 WHERE/train/WHERE_00106
5125 THOUSANDS/train/THOUSANDS_00913
5125 ALLOW/train/ALLOW_00278
5125 AFTER/train/AFTER_00373
5125 LATEST/train/LATEST_00824
5125 AMERICA/train/AMERICA_00213
5125 GENERAL/train/GENERAL_00167
5125 MOMENT/train/MOMENT_00206
5125 EMERGENCY/train/EMERGENCY_00262
5125 EUROPE/train/EUROPE_00510
5125 WEATHER/train/WEATHER_00519
5125 RUSSIA/train/RUSSIA_00097
5125 LIKELY/train/LIKELY_00907
5125 PRESS/train/PRESS_00067
5125 LITTLE/train/LITTLE_00207
5125 YEARS/train/YEARS_00295
5125 MEANS/train/MEANS_00400
5125 MARKET/train/MARKET_00029
5125 RATES/train/RATES_00574
5125 POLITICAL/train/POLITICAL_00405
5125 FOREIGN/train/FOREIGN_00719
5125 AMERICAN/train/AMERICAN_00381
5125 CHARGES/train/CHARGES_00384
5125 WEEKEND/train/WEEKEND_00447
5125 SEVERAL/train/SEVERAL_00821
5125 GLOBAL/train/GLOBAL_00252
5125 DAVID/train/DAVID_00381
5125 REPORTS/train/REPORTS_00489
5125 BECAUSE/train/BECAUSE_00791
5125 STORY/train/STORY_00053
5125 TODAY/train/TODAY_00973
5125 AROUND/train/AROUND_00768
5125 FORMER/train/FORMER_00927
5125 ATTACKS/train/ATTACKS_00036
5125 SYRIAN/train/SYRIAN_00422
5125 LEAVE/train/LEAVE_00395
5125 CAPITAL/train/CAPITAL_00403
5125 HOURS/train/HOURS_00850
5125 WITHOUT/train/WITHOUT_00069
5125 AFFECTED/train/AFFECTED_00666
5125 HUMAN/train/HUMAN_00982
5125 MILLIONS/train/MILLIONS_00644
5125 MURDER/train/MURDER_00330
5125 WELCOME/train/WELCOME_00532
5125 LITTLE/train/LITTLE_00370
5125 FINAL/train/FINAL_00674
5125 ALREADY/train/ALREADY_00503
5125 SIDES/train/SIDES_00440
5125 AFRICA/train/AFRICA_00058
5125 PERSON/train/PERSON_00346
5125 EASTERN/train/EASTERN_00435
5125 BROUGHT/train/BROUGHT_00300
5125 EUROPEAN/train/EUROPEAN_00395
5125 RUSSIA/train/RUSSIA_00248
5125 BUILD/train/BUILD_00553
5125 FRANCE/train/FRANCE_00988
5125 SPENT/train/SPENT_00551
5125 CRISIS/train/CRISIS_00218
5125 AREAS/train/AREAS_00810
5125 FIGHTING/train/FIGHTING_00743
5125 UNITED/train/UNITED_00598
5125 MONTHS/train/MONTHS_00212
5125 PROCESS/train/PROCESS_00356
5125 SEVEN/train/SEVEN_00831
5125 VOTERS/train/VOTERS_00761
5125 FOLLOWING/train/FOLLOWING_00034
5125 FOREIGN/train/FOREIGN_00729
5125 PRIVATE/train/PRIVATE_00384
5125 EUROPEAN/train/EUROPEAN_00488
5125 HAPPENED/train/HAPPENED_00104
5125 BETTER/train/BETTER_00652
5125 LEVELS/train/LEVELS_00742
5125 STATE/train/STATE_00070
5125 SPEAKING/train/SPEAKING_00764
5125 SPEAKING/train/SPEAKING_00689
5125 LEAVE/train/LEAVE_00603
5125 KILLED/train/KILLED_00038
5125 SHORT/train/SHORT_00054
5125 SPECIAL/train/SPECIAL_00444
5125 WAITING/train/WAITING_00048
5125 BEHIND/train/BEHIND_00745
5125 SIMPLY/train/SIMPLY_00149
5125 FIRST/train/FIRST_00181
5125 AFTER/train/AFTER_00376
5125 ALMOST/train/ALMOST_00184
5125 CLEAR/train/CLEAR_00676
5125 SERIES/train/SERIES_00525
5125 GROWING/train/GROWING_00750
5125 HIGHER/train/HIGHER_00040
5125 MONTH/train/MONTH_00077
5125 HEART/train/HEART_00568
5125 INSIDE/train/INSIDE_00822
5125 ATTACK/train/ATTACK_00088
5125 PAYING/train/PAYING_00301
5125 RESPONSE/train/RESPONSE_00294
5125 PEOPLE/train/PEOPLE_00475
5125 MEMBER/train/MEMBER_00678
5125 CASES/train/CASES_00285
5125 SITUATION/train/SITUATION_00595
5125 MEASURES/train/MEASURES_00740
5125 OPERATION/train/OPERATION_00355
5125 ACCUSED/train/ACCUSED_00470
5125 LITTLE/train/LITTLE_00101
5125 BILLION/train/BILLION_00376
5125 COMING/train/COMING_00127
5125 SPECIAL/train/SPECIAL_00548
5125 LIKELY/train/LIKELY_00423
5125 FOREIGN/train/FOREIGN_00232
5125 WALES/train/WALES_00304
5125 SHORT/train/SHORT_00953
5125 COMPANY/train/COMPANY_00497
5125 USING/train/USING_00371
5125 HOMES/train/HOMES_00201
5125 ATTACK/train/ATTACK_00006
5125 MEDICAL/train/MEDICAL_00625
5125 BEHIND/train/BEHIND_00548
5125 CASES/train/CASES_00266
5125 WEEKEND/train/WEEKEND_00125
5125 AUTHORITIES/train/AUTHORITIES_00369
5125 EVERYTHING/train/EVERYTHING_00024
5125 TALKS/train/TALKS_00294
5125 SYRIA/train/SYRIA_00916
5125 REFERENDUM/train/REFERENDUM_00001
5125 SYRIAN/train/SYRIAN_00322
5125 WEEKS/train/WEEKS_00011
5125 THIRD/train/THIRD_00872
5125 VIOLENCE/train/VIOLENCE_00319
5125 TOMORROW/train/TOMORROW_00066
5125 HOMES/train/HOMES_00819
5125 WEAPONS/train/WEAPONS_00314
5125 LEADERS/train/LEADERS_00861
5125 FORCES/train/FORCES_00590
5125 MILITARY/train/MILITARY_00561
5125 CHILDREN/train/CHILDREN_00903
5125 GUILTY/train/GUILTY_00513
5125 FIGURES/train/FIGURES_00727
5125 FRONT/train/FRONT_00048
5125 TALKS/train/TALKS_00966
5125 WESTERN/train/WESTERN_00060
5125 ANNOUNCED/train/ANNOUNCED_00787
5125 MURDER/train/MURDER_00184
5125 STAGE/train/STAGE_00387
5125 JUSTICE/train/JUSTICE_00644
5125 SECOND/train/SECOND_00373
5125 HOSPITAL/train/HOSPITAL_00713
5125 COUPLE/train/COUPLE_00431
5125 SECURITY/train/SECURITY_00006
5125 GENERAL/train/GENERAL_00486
5125 WESTERN/train/WESTERN_00610
5125 GROUP/train/GROUP_00750
5125 SECRETARY/train/SECRETARY_00303
5125 FORCE/train/FORCE_00405
5125 PERSONAL/train/PERSONAL_00482
5125 KNOWN/train/KNOWN_00235
5125 TALKS/train/TALKS_00337
5125 EUROPE/train/EUROPE_00553
5125 PRESIDENT/train/PRESIDENT_00785
5125 POWER/train/POWER_00738
5125 PERSONAL/train/PERSONAL_00447
5125 MASSIVE/train/MASSIVE_00136
5125 CLAIMS/train/CLAIMS_00160
5125 CHARGES/train/CHARGES_00562
5125 ABOUT/train/ABOUT_00758
5125 FURTHER/train/FURTHER_00857
5125 CONFLICT/train/CONFLICT_00451
5125 BEING/train/BEING_00127
5125 GROUP/train/GROUP_00877
5125 HOUSE/train/HOUSE_00757
5125 GUILTY/train/GUILTY_00411
5125 SPECIAL/train/SPECIAL_00728
5125 QUESTIONS/train/QUESTIONS_00029
5125 SENIOR/train/SENIOR_00213
5125 RUSSIA/train/RUSSIA_00947
5125 PRIME/train/PRIME_00120
5125 GIVEN/train/GIVEN_00554
5125 IMPACT/train/IMPACT_00558
5125 SUNDAY/train/SUNDAY_00704
5125 BRING/train/BRING_00016
5125 CENTRAL/train/CENTRAL_00946
5125 KNOWN/train/KNOWN_00627
5125 DESCRIBED/train/DESCRIBED_00988
5125 ELECTION/train/ELECTION_00520
5125 GEORGE/train/GEORGE_00005
5125 CONFERENCE/train/CONFERENCE_00349
5125 PUBLIC/train/PUBLIC_00051
5125 SMALL/train/SMALL_00868
5125 POLICY/train/POLICY_00743
5125 STREET/train/STREET_00945
5125 EXACTLY/train/EXACTLY_00001
6003 VIOLENCE/train/VIOLENCE_00745
6003 WESTMINSTER/train/WESTMINSTER_00104
6003 WOMEN/train/WOMEN_00490
6003 EVERY/train/EVERY_00935
6003 WHOLE/train/WHOLE_00693
6003 RECENT/train/RECENT_00550
6003 THIRD/train/THIRD_00945
6003 GENERAL/train/GENERAL_00309
6003 SPEND/train/SPEND_00034
6003 HEART/train/HEART_00412
6003 OFFICE/train/OFFICE_00296
6003 MEETING/train/MEETING_00949
6003 LEVEL/train/LEVEL_00076
6003 SYRIAN/train/SYRIAN_00509
6003 CAMPAIGN/train/CAMPAIGN_00062
6003 HEARD/train/HEARD_00609
6003 KNOWN/train/KNOWN_00227
6003 FOREIGN/train/FOREIGN_00912
6003 PRESIDENT/train/PRESIDENT_00615
6003 CENTRAL/train/CENTRAL_00369
6003 RESPONSE/train/RESPONSE_00251
6003 MEETING/train/MEETING_00925
6003 QUITE/train/QUITE_00696
6003 PUBLIC/train/PUBLIC_00185
6003 REPORTS/train/REPORTS_00722
6003 BIGGEST/train/BIGGEST_00399
6003 SPEND/train/SPEND_00729
6003 KNOWN/train/KNOWN_00145
6003 ANOTHER/train/ANOTHER_00778
6003 MEANS/train/MEANS_00303
6003 TALKS/train/TALKS_00916
6003 HISTORY/train/HISTORY_00163
6003 SENIOR/train/SENIOR_00681
6003 WANTED/train/WANTED_00972
6003 DECIDED/train/DECIDED_00342
6003 MONEY/train/MONEY_00252
6003 EVERYONE/train/EVERYONE_00554
6003 RESPONSE/train/RESPONSE_00184
6003 WELFARE/train/WELFARE_00419
6003 BRITAIN/train/BRITAIN_00013
6003 AGAIN/train/AGAIN_00218
6003 LITTLE/train/LITTLE_00196
6003 WAITING/train/WAITING_00541
6003 FAMILIES/train/FAMILIES_00320
6003 DEBATE/train/DEBATE_00415
6003 MEMBER/train/MEMBER_00500
6003 SOCIETY/train/SOCIETY_00503
6003 LOCAL/train/LOCAL_00325
6003 HUNDREDS/train/HUNDREDS_00172
6003 FINANCIAL/train/FINANCIAL_00112
6003 WORKERS/train/WORKERS_00291
6003 CONFERENCE/train/CONFERENCE_00042
6003 PARTY/train/PARTY_00913
6003 TODAY/train/TODAY_00631
6003 OPERATION/train/OPERATION_00562
6003 BRITAIN/train/BRITAIN_00031
6003 QUESTION/train/QUESTION_00992
6003 TONIGHT/train/TONIGHT_00236
6003 MAKES/train/MAKES_00189
6003 SYRIA/train/SYRIA_00906
6003 CAMPAIGN/train/CAMPAIGN_00427
6003 HAPPEN/train/HAPPEN_00552
6003 LOOKING/train/LOOKING_00971
6003 SPEECH/train/SPEECH_00552
6003 SOUTHERN/train/SOUTHERN_00347
6003 EVENING/train/EVENING_00222
6003 CLAIMS/train/CLAIMS_00257
6003 GROUP/train/GROUP_00826
6003 AGAIN/train/AGAIN_00985
6003 MEDIA/train/MEDIA_00194
6003 ACCORDING/train/ACCORDING_00673
6003 WHICH/train/WHICH_00197
6003 BUDGET/train/BUDGET_00891
6003 DETAILS/train/DETAILS_00009
6003 SUNDAY/train/SUNDAY_00865
6003 CHIEF/train/CHIEF_00347
6003 EVIDENCE/train/EVIDENCE_00594
6003 INFLATION/train/INFLATION_00218
6003 JUSTICE/train/JUSTICE_00571
6003 DEBATE/train/DEBATE_00238
6003 WOMEN/train/WOMEN_00366
6003 THEIR/train/THEIR_00546
6003 WEAPONS/train/WEAPONS_00597
6003 TRADE/train/TRADE_00180
6003 COUNTRY/train/COUNTRY_00262
6003 SOCIAL/train/SOCIAL_00436
6003 SERVICE/train/SERVICE_00290
6003 PHONE/train/PHONE_00114
6003 POWERS/train/POWERS_00650
6003 DAVID/train/DAVID_00787
6003 EVENING/train/EVENING_00404
6003 JUSTICE/train/JUSTICE_00839
6003 ENGLAND/train/ENGLAND_00325
6003 COUPLE/train/COUPLE_00295
6003 COULD/train/COULD_00561
6003 SERIES/train/SERIES_00316
6003 STATES/train/STATES_00659
6003 DURING/train/DURING_00146
6003 STARTED/train/STARTED_00697
6003 JUDGE/train/JUDGE_00796
6003 SOMEONE/train/SOMEONE_00558
6003 AMONG/train/AMONG_00585
6003 SCOTLAND/train/SCOTLAND_00060
6003 SENIOR/train/SENIOR_00395
6003 WALES/train/WALES_00196
6003 EDUCATION/train/EDUCATION_00585
6003 GENERAL/train/GENERAL_00676
6003 SPENT/train/SPENT_00759
6003 WELFARE/train/WELFARE_00256
6003 BECOME/train/BECOME_00303
6003 ANOTHER/train/ANOTHER_00605
6003 CLAIMS/train/CLAIMS_00456
6003 SINCE/train/SINCE_00148
6003 EXAMPLE/train/EXAMPLE_00324
6003 WITHOUT/train/WITHOUT_00956
6003 EXPECT/train/EXPECT_00763
6003 THINGS/train/THINGS_00371
6003 WARNING/train/WARNING_00358
6003 ASKED/train/ASKED_00591
6003 GOVERNMENT/train/GOVERNMENT_00306
6003 ALREADY/train/ALREADY_00480
6003 ALLEGATIONS/train/ALLEGATIONS_00870
6003 AMONG/train/AMONG_00591
6003 PRESIDENT/train/PRESIDENT_00916
6003 AFFECTED/train/AFFECTED_00678
6003 EDUCATION/train/EDUCATION_00247
6003 ACTION/train/ACTION_00783
6003 ANOTHER/train/ANOTHER_00393
6003 RIGHT/train/RIGHT_00046
6003 ALLOWED/train/ALLOWED_00782
6003 MEMBER/train/MEMBER_00451
6003 TALKING/train/TALKING_00622
6003 WORLD/train/WORLD_00443
6003 EMERGENCY/train/EMERGENCY_00685
6003 TAKING/train/TAKING_00022
6003 WORDS/train/WORDS_00593
6003 NOTHING/train/NOTHING_00887
6003 ENERGY/train/ENERGY_00527
6003 BEFORE/train/BEFORE_00569
6003 FIGURES/train/FIGURES_00307
6003 INVOLVED/train/INVOLVED_00863
6003 DAVID/train/DAVID_00813
6003 EVERYONE/train/EVERYONE_00038
6003 LEADERSHIP/train/LEADERSHIP_00300
6003 HOUSE/train/HOUSE_00200
6003 MOMENT/train/MOMENT_00353
6003 MILLION/train/MILLION_00530
6003 DOING/train/DOING_00882
6003 UNDER/train/UNDER_00139
6003 MINUTES/train/MINUTES_00420
6003 TOMORROW/train/TOMORROW_00368
6003 POSITION/train/POSITION_00206
6003 INTEREST/train/INTEREST_00448
6003 AMERICA/train/AMERICA_00412
6003 ENOUGH/train/ENOUGH_00245
6003 ASKED/train/ASKED_00008
6003 POLITICS/train/POLITICS_00962
6003 POLITICS/train/POLITICS_00176
6003 BENEFIT/train/BENEFIT_00821
6003 THERE/train/THERE_00068
6003 EVERYBODY/train/EVERYBODY_00673
6003 RUSSIA/train/RUSSIA_00927
6003 LEAST/train/LEAST_00901
6003 TRIAL/train/TRIAL_00636
6003 CAMPAIGN/train/CAMPAIGN_00746
6003 OFFICIALS/train/OFFICIALS_00717
6003 MASSIVE/train/MASSIVE_00507
6003 WEAPONS/train/WEAPONS_00729
6003 BEFORE/train/BEFORE_00634
6003 BENEFITS/train/BENEFITS_00011
6003 LEAVE/train/LEAVE_00441
6003 COUNTRY/train/COUNTRY_00858
6003 SYRIA/train/SYRIA_00302
6003 DESPITE/train/DESPITE_00725
6003 SYRIAN/train/SYRIAN_00337
6003 THESE/train/THESE_00987
6003 WORLD/train/WORLD_00120
6003 CLOSE/train/CLOSE_00759
6003 SUNDAY/train/SUNDAY_00913
6003 ENERGY/train/ENERGY_00827
6003 CANNOT/train/CANNOT_00429
6003 LEADERSHIP/train/LEADERSHIP_00802
6003 TRADE/train/TRADE_00125
6003 HUMAN/train/HUMAN_00078
6003 AGAIN/train/AGAIN_00535
6003 POLITICS/train/POLITICS_00683
6003 HEARD/train/HEARD_00029
6003 NUMBER/train/NUMBER_00674
6003 INDEPENDENT/train/INDEPENDENT_00055
6003 WEEKS/train/WEEKS_00402
6003 RECORD/train/RECORD_00920
6003 EDUCATION/train/EDUCATION_00856
6003 WORLD/train/WORLD_00029
6003 THOUGHT/train/THOUGHT_00418
6003 AFRICA/train/AFRICA_00796
6003 START/train/START_00467
6003 MONEY/train/MONEY_00556
6003 LONDON/train/LONDON_00660
6003 STATES/train/STATES_00670
6003 ASKED/train/ASKED_00564
6003 UNITED/train/UNITED_00822
6003 BLACK/train/BLACK_00276
6003 BRING/train/BRING_00164
6003 POLICY/train/POLICY_00614
6003 THOUSANDS/train/THOUSANDS_00666
6003 WANTED/train/WANTED_00749
6003 UNDERSTAND/train/UNDERSTAND_00947
6003 HEART/train/HEART_00755
6003 SIMPLY/train/SIMPLY_00406
6003 BECOME/train/BECOME_00024
6003 SERVICE/train/SERVICE_00068
6003 EDUCATION/train/EDUCATION_00731
6003 WOMEN/train/WOMEN_00809
6003 BIGGEST/train/BIGGEST_00083
6003 WHOLE/train/WHOLE_00324
6003 LIVING/train/LIVING_00028
6003 SPEECH/train/SPEECH_00578
6003 LATEST/train/LATEST_00869
6003 JUSTICE/train/JUSTICE_00828
6003 GEORGE/train/GEORGE_00082
6003 MANCHESTER/train/MANCHESTER_00081
6003 WHILE/train/WHILE_00079
6003 OUTSIDE/train/OUTSIDE_00908
6003 OPPOSITION/train/OPPOSITION_00395
6003 CALLED/train/CALLED_00688
6003 THREE/train/THREE_00245
6003 CHANCE/train/CHANCE_00032
6003 PROBLEM/train/PROBLEM_00893
6003 PARLIAMENT/train/PARLIAMENT_00188
6003 POINT/train/POINT_00845
6003 ECONOMIC/train/ECONOMIC_00632
6003 SECRETARY/train/SECRETARY_00597
6003 TONIGHT/train/TONIGHT_00805
6003 ISSUE/train/ISSUE_00897
6003 EXPECTED/train/EXPECTED_00106
6003 THOUGHT/train/THOUGHT_00042
6003 ENERGY/train/ENERGY_00731
6003 HOSPITAL/train/HOSPITAL_00065
6003 SEEMS/train/SEEMS_00250
6003 OTHERS/train/OTHERS_00470
6003 PRESIDENT/train/PRESIDENT_00540
6003 STAGE/train/STAGE_00042
6003 SMALL/train/SMALL_00069
6003 PRIME/train/PRIME_00404
6003 INFLATION/train/INFLATION_00647
6003 WORLD/train/WORLD_00381
6003 PRETTY/train/PRETTY_00202
6003 TRUST/train/TRUST_00087
6003 WESTMINSTER/train/WESTMINSTER_00746
6003 WANTED/train/WANTED_00656
6003 OTHERS/train/OTHERS_00469
6003 BECOME/train/BECOME_00752
6003 OTHERS/train/OTHERS_00317
6003 TOWARDS/train/TOWARDS_00971
6003 DEATH/train/DEATH_00590
6003 WOMEN/train/WOMEN_00943
6003 AMERICA/train/AMERICA_00122
6003 SYRIA/train/SYRIA_00338
6003 RUNNING/train/RUNNING_00701
6003 ALLEGATIONS/train/ALLEGATIONS_00933
6003 PARTY/train/PARTY_00577
6003 LEVELS/train/LEVELS_00433
6003 TIMES/train/TIMES_00495
6003 STAFF/train/STAFF_00712
6003 THOUGHT/train/THOUGHT_00991
6003 PARENTS/train/PARENTS_00965
6003 STATES/train/STATES_00471
6003 FIGURES/train/FIGURES_00833
6003 WHERE/train/WHERE_00512
6003 COMMUNITY/train/COMMUNITY_00488
6003 INSIDE/train/INSIDE_00375
6003 STATEMENT/train/STATEMENT_00896
6003 POINT/train/POINT_00838
6003 ITSELF/train/ITSELF_00150
6003 MATTER/train/MATTER_00521
6003 ACROSS/train/ACROSS_00213
6003 MILLION/train/MILLION_00996
6003 CALLED/train/CALLED_00308
6003 SAYING/train/SAYING_00090
6003 STATEMENT/train/STATEMENT_00200
6003 SERIES/train/SERIES_00339
6003 HEARD/train/HEARD_00354
6003 LEVEL/train/LEVEL_00106
6003 ASKED/train/ASKED_00784
6003 ACTION/train/ACTION_00414
6003 LABOUR/train/LABOUR_00839
6003 DECIDED/train/DECIDED_00197
6003 ISSUE/train/ISSUE_00751
6003 EVENTS/train/EVENTS_00413
6003 THREAT/train/THREAT_00063
6003 CANCER/train/CANCER_00280
6003 SYRIAN/train/SYRIAN_00358
6003 CAMPAIGN/train/CAMPAIGN_00997
6003 THEMSELVES/train/THEMSELVES_00603
6003 ECONOMIC/train/ECONOMIC_00275
6003 HAPPENED/train/HAPPENED_00123
6003 ASKED/train/ASKED_00440
6003 PRESS/train/PRESS_00691
6003 RUSSIAN/train/RUSSIAN_00321
6003 WITHIN/train/WITHIN_00570
6003 OFFICE/train/OFFICE_00050
6003 POSSIBLE/train/POSSIBLE_00047
6003 TODAY/train/TODAY_00856
6003 WORLD/train/WORLD_00644
6003 CHANGE/train/CHANGE_00404
6003 THIRD/train/THIRD_00118
6003 DECIDED/train/DECIDED_00218
6003 SYRIAN/train/SYRIAN_00760
6003 HOUSE/train/HOUSE_00300
6003 MINISTER/train/MINISTER_00796
6003 TODAY/train/TODAY_00771
6003 POSITION/train/POSITION_00248
6003 EXAMPLE/train/EXAMPLE_00539
6003 CRISIS/train/CRISIS_00365
6003 WATER/train/WATER_00423
6003 HAVING/train/HAVING_00860
6003 WORKERS/train/WORKERS_00273
6003 SYRIAN/train/SYRIAN_00103
6003 STATEMENT/train/STATEMENT_00088
6003 PRESIDENT/train/PRESIDENT_00371
6003 TIMES/train/TIMES_00905
6003 EVERYONE/train/EVERYONE_00887
6003 ECONOMY/train/ECONOMY_00527
6003 WHICH/train/WHICH_00950
6003 WANTED/train/WANTED_00821
6003 WHILE/train/WHILE_00772
6003 PERHAPS/train/PERHAPS_00949
6003 WHICH/train/WHICH_00586
6003 PROBLEM/train/PROBLEM_00187
6003 PRIVATE/train/PRIVATE_00902
6003 NOTHING/train/NOTHING_00456
6003 MESSAGE/train/MESSAGE_00395
6003 RIGHT/train/RIGHT_00923
6003 MOVING/train/MOVING_00961
6003 THROUGH/train/THROUGH_00670
6003 EMERGENCY/train/EMERGENCY_00012
6003 EDITOR/train/EDITOR_00873
6003 RETURN/train/RETURN_00801
6003 GROUND/train/GROUND_00730
6003 IMMIGRATION/train/IMMIGRATION_00879
6003 AFRICA/train/AFRICA_00515
6003 REALLY/train/REALLY_00822
6003 WELFARE/train/WELFARE_00741
6003 GREAT/train/GREAT_00732
6003 COURSE/train/COURSE_00594
6003 OPPOSITION/train/OPPOSITION_00183
6003 SITUATION/train/SITUATION_00845
6003 QUESTIONS/train/QUESTIONS_00917
6003 UNDERSTAND/train/UNDERSTAND_00820
6003 TALKS/train/TALKS_00150
6003 RESULT/train/RESULT_00526
6003 THOUSANDS/train/THOUSANDS_00645
6003 TODAY/train/TODAY_00590
6003 AGREE/train/AGREE_00335
6003 THEIR/train/THEIR_00056
6003 THERE/train/THERE_00884
6003 ACCORDING/train/ACCORDING_00664
6003 EVENTS/train/EVENTS_00046
6003 CHANCE/train/CHANCE_00152
6003 HOSPITAL/train/HOSPITAL_00647
6003 PHONE/train/PHONE_00540
6003 HOUSING/train/HOUSING_00313
6003 ACCUSED/train/ACCUSED_00254
6003 UNDERSTAND/train/UNDERSTAND_00849
6003 SOUTH/train/SOUTH_00959
6003 WHETHER/train/WHETHER_00787
6003 HAPPENING/train/HAPPENING_00371
6003 ATTACK/train/ATTACK_00318
6003 SECRETARY/train/SECRETARY_00223
6003 FURTHER/train/FURTHER_00536
6003 MARKET/train/MARKET_00528
6003 COURSE/train/COURSE_00427
6003 NUMBER/train/NUMBER_00974
6003 INQUIRY/train/INQUIRY_00560
6003 ALWAYS/train/ALWAYS_00837
6003 NORTH/train/NORTH_00189
6003 WRONG/train/WRONG_00772
6003 UNTIL/train/UNTIL_00649
6003 ASKED/train/ASKED_00256
6003 HISTORY/train/HISTORY_00806
6003 MEMBERS/train/MEMBERS_00577
6003 CLOSE/train/CLOSE_00601
6003 EXPECT/train/EXPECT_00606
6003 SOCIETY/train/SOCIETY_00962
6003 AMERICAN/train/AMERICAN_00152
6003 USING/train/USING_00124
6003 SOMEONE/train/SOMEONE_00834
6003 HOUSE/train/HOUSE_00839
6003 STAND/train/STAND_00232
6003 WORLD/train/WORLD_00822
6003 TRADE/train/TRADE_00415
6003 LIKELY/train/LIKELY_00719
6003 HUNDREDS/train/HUNDREDS_00474
6003 GEORGE/train/GEORGE_00303
6003 FORCES/train/FORCES_00629
6003 POLITICS/train/POLITICS_00516
6003 ABUSE/train/ABUSE_00562
6003 CAPITAL/train/CAPITAL_00199
6003 WEAPONS/train/WEAPONS_00639
6003 POINT/train/POINT_00974
6003 FIGHT/train/FIGHT_00893
6003 SECURITY/train/SECURITY_00524
6003 UNITED/train/UNITED_00432
6003 NUMBERS/train/NUMBERS_00541
6003 LIVING/train/LIVING_00552
6003 AMONG/train/AMONG_00306
6003 MILLION/train/MILLION_00405
6003 WEAPONS/train/WEAPONS_00943
6003 WANTS/train/WANTS_00545
6003 THOUSANDS/train/THOUSANDS_00279
6003 NATIONAL/train/NATIONAL_00211
6003 INTEREST/train/INTEREST_00145
6003 SOCIETY/train/SOCIETY_00719
6003 MAKES/train/MAKES_00612
6003 LEADER/train/LEADER_00235
6003 RATHER/train/RATHER_00460
6003 ASKING/train/ASKING_00529
6003 JUSTICE/train/JUSTICE_00856
6003 ABUSE/train/ABUSE_00142
6003 MILLION/train/MILLION_00669
6003 HEALTH/train/HEALTH_00680
6003 ALREADY/train/ALREADY_00300
6003 POSSIBLE/train/POSSIBLE_00076
6003 COMES/train/COMES_00672
6003 STATES/train/STATES_00937
6003 CONSERVATIVE/train/CONSERVATIVE_00127
6003 RESPONSE/train/RESPONSE_00003
6003 PROBABLY/train/PROBABLY_00178
6003 MEDIA/train/MEDIA_00369
6003 CONCERNS/train/CONCERNS_00666
6003 COURSE/train/COURSE_00782
6003 TAKEN/train/TAKEN_00594
6003 HAPPENING/train/HAPPENING_00369
6003 FAMILY/train/FAMILY_00190
6003 SINGLE/train/SINGLE_00491
6003 WITHIN/train/WITHIN_00682
6003 TODAY/train/TODAY_00699
6003 FOREIGN/train/FOREIGN_00253
6003 MATTER/train/MATTER_00197
6003 JUSTICE/train/JUSTICE_00049
6003 PRIME/train/PRIME_00673
6003 LITTLE/train/LITTLE_00384
6003 REPORTS/train/REPORTS_00879
6003 SOMEONE/train/SOMEONE_00166
6003 CERTAINLY/train/CERTAINLY_00191
6003 DECIDED/train/DECIDED_00469
6003 UNION/train/UNION_00393
6003 ALLEGATIONS/train/ALLEGATIONS_00436
6003 WHILE/train/WHILE_00505
6003 VOTERS/train/VOTERS_00293
6003 AMONG/train/AMONG_00351
6003 VIOLENCE/train/VIOLENCE_00285
6003 EVERYONE/train/EVERYONE_00271
6003 OTHER/train/OTHER_00742
6003 ASKED/train/ASKED_00262
6003 PLANS/train/PLANS_00998
6003 ANSWER/train/ANSWER_00711
6003 MASSIVE/train/MASSIVE_00346
6003 SYRIA/train/SYRIA_00677
6003 WATCHING/train/WATCHING_00019
6003 ACTION/train/ACTION_00574
6003 EVENING/train/EVENING_00481
6003 GROUP/train/GROUP_00963
6003 ABOUT/train/ABOUT_00078
6003 ISLAMIC/train/ISLAMIC_00569
6003 AMONG/train/AMONG_00634
6003 RATES/train/RATES_00897
6003 STILL/train/STILL_00246
6003 FACING/train/FACING_00755
6003 SPEND/train/SPEND_00091
6003 CURRENT/train/CURRENT_00759
6003 THOSE/train/THOSE_00299
6003 HEALTH/train/HEALTH_00959
6003 OFFICE/train/OFFICE_00950
6003 MEASURES/train/MEASURES_00435
6003 OBAMA/train/OBAMA_00093
6003 RUNNING/train/RUNNING_00196
6003 TOMORROW/train/TOMORROW_00301
6003 WHOLE/train/WHOLE_00582
6003 STATEMENT/train/STATEMENT_00543
6003 PARTY/train/PARTY_00268
6003 INVESTMENT/train/INVESTMENT_00773
6003 MAKING/train/MAKING_00084
6003 NATIONAL/train/NATIONAL_00930
6003 RECENT/train/RECENT_00393
6003 SERIES/train/SERIES_00400
6003 TRUST/train/TRUST_00596
6003 HUNDREDS/train/HUNDREDS_00537
6003 HAPPENING/train/HAPPENING_00351
6003 GROWTH/train/GROWTH_00457
6003 HEARD/train/HEARD_00913
6003 BRITISH/train/BRITISH_00297
6003 RATHER/train/RATHER_00405
6003 BILLION/train/BILLION_00638
6003 SINGLE/train/SINGLE_00559
6003 ACCUSED/train/ACCUSED_00173
6003 ALREADY/train/ALREADY_00183
6003 RIGHTS/train/RIGHTS_00971
6003 DEATH/train/DEATH_00007
6003 PROVIDE/train/PROVIDE_00271
6003 MEMBERS/train/MEMBERS_00498
6003 GOING/train/GOING_00082
6003 ISSUES/train/ISSUES_00807
6003 WANTED/train/WANTED_00708
6003 WHERE/train/WHERE_00556
6003 EDITOR/train/EDITOR_00492
6003 THOUGHT/train/THOUGHT_00766
6003 LIVING/train/LIVING_00440
6003 STAGE/train/STAGE_00666
6003 THING/train/THING_00119
6003 EVERYTHING/train/EVERYTHING_00745
6003 HEALTH/train/HEALTH_00996
6003 STAGE/train/STAGE_00365
6003 BRITISH/train/BRITISH_00234
6003 BIGGEST/train/BIGGEST_00471
6003 COUNCIL/train/COUNCIL_00970
6003 ATTACKS/train/ATTACKS_00084
6003 SENSE/train/SENSE_00544
6003 YOUNG/train/YOUNG_00885
6003 MEMBER/train/MEMBER_00620
6003 THOUGHT/train/THOUGHT_00567
6003 CHARGES/train/CHARGES_00694
6003 WEAPONS/train/WEAPONS_00010
6003 EVERYTHING/train/EVERYTHING_00437
6003 PARTS/train/PARTS_00121
6003 RUSSIA/train/RUSSIA_00972
6003 ARRESTED/train/ARRESTED_00491
6003 CONFERENCE/train/CONFERENCE_00513
6003 HAPPENED/train/HAPPENED_00760
6003 LEVELS/train/LEVELS_00838
6003 PRESIDENT/train/PRESIDENT_00619
6003 DEBATE/train/DEBATE_00042
6003 MASSIVE/train/MASSIVE_00680
6003 HOUSE/train/HOUSE_00869
6003 SPENDING/train/SPENDING_00685
6003 PRIVATE/train/PRIVATE_00922
6003 FAMILY/train/FAMILY_00703
6003 SECOND/train/SECOND_00259
6003 AMERICAN/train/AMERICAN_00837
6003 FOUND/train/FOUND_00409
6003 INQUIRY/train/INQUIRY_00035
6003 SOMETHING/train/SOMETHING_00114
6003 SINCE/train/SINCE_00756
6003 POLITICAL/train/POLITICAL_00320
6003 WORKING/train/WORKING_00346
6003 EDITOR/train/EDITOR_00454
6003 PRIVATE/train/PRIVATE_00387
6003 ISLAMIC/train/ISLAMIC_00170
6003 HUMAN/train/HUMAN_00735
6003 ABUSE/train/ABUSE_00962
6003 ENERGY/train/ENERGY_00114
6003 MARKET/train/MARKET_00147
6003 CLAIMS/train/CLAIMS_00001
6003 GENERAL/train/GENERAL_00298
6003 THROUGH/train/THROUGH_00162
6003 WHILE/train/WHILE_00754
6003 SECRETARY/train/SECRETARY_00174
6003 PARLIAMENT/train/PARLIAMENT_00756
6003 CHANGES/train/CHANGES_00670
6003 AUTHORITIES/train/AUTHORITIES_00236
6003 EDITOR/train/EDITOR_00367
6003 CONFERENCE/train/CONFERENCE_00216
6003 RIGHTS/train/RIGHTS_00087
6003 OFFICE/train/OFFICE_00684
6003 SCHOOLS/train/SCHOOLS_00545
6003 ASKED/train/ASKED_00713
6003 DECISION/train/DECISION_00595
6003 RUNNING/train/RUNNING_00545
6003 SPEND/train/SPEND_00601
6003 CONFLICT/train/CONFLICT_00240
6003 HEART/train/HEART_00523
6003 ALLOWED/train/ALLOWED_00090
6003 POLITICS/train/POLITICS_00358
6003 SPECIAL/train/SPECIAL_00539
6003 SEEMS/train/SEEMS_00310
6003 THOSE/train/THOSE_00103
6003 CHALLENGE/train/CHALLENGE_00507
6003 VIOLENCE/train/VIOLENCE_00656
6003 TONIGHT/train/TONIGHT_00903
6003 INFLATION/train/INFLATION_00460
6003 DECIDED/train/DECIDED_00442
6003 OFTEN/train/OFTEN_00331
6003 ASKED/train/ASKED_00068
6003 LEAST/train/LEAST_00572
6003 EVERY/train/EVERY_00054
6003 STATES/train/STATES_00812
6003 RUSSIA/train/RUSSIA_00042
6003 OFFICIALS/train/OFFICIALS_00100
6003 PRETTY/train/PRETTY_00729
6003 MINUTES/train/MINUTES_00915
6003 INFORMATION/train/INFORMATION_00623
6003 INVESTMENT/train/INVESTMENT_00024
6003 SENIOR/train/SENIOR_00288
6003 LEADERSHIP/train/LEADERSHIP_00282
6003 PRESS/train/PRESS_00684
6003 CLAIMS/train/CLAIMS_00146
6003 MINISTER/train/MINISTER_00997
6003 AMERICAN/train/AMERICAN_00236
6003 THOUGHT/train/THOUGHT_00895
6003 BEFORE/train/BEFORE_00366
6003 TONIGHT/train/TONIGHT_00133
6003 CAMPAIGN/train/CAMPAIGN_00359
6003 SEEMS/train/SEEMS_00544
6003 PLANS/train/PLANS_00281
6003 START/train/START_00689
6003 SCHOOLS/train/SCHOOLS_00633
6003 PROBLEM/train/PROBLEM_00482
6003 FORMER/train/FORMER_00912
6003 WHICH/train/WHICH_00992
6003 DIFFERENT/train/DIFFERENT_00810
6003 SPEECH/train/SPEECH_00259
6003 AMERICAN/train/AMERICAN_00226
6003 OTHERS/train/OTHERS_00989
6003 DECIDED/train/DECIDED_00526
6003 EDUCATION/train/EDUCATION_00457
6003 PARENTS/train/PARENTS_00467
6003 THEMSELVES/train/THEMSELVES_00940
6003 MILLIONS/train/MILLIONS_00378
6003 SENIOR/train/SENIOR_00380
6003 CHILDREN/train/CHILDREN_00474
6003 COMING/train/COMING_00132
6003 CLAIMS/train/CLAIMS_00069
6003 WHETHER/train/WHETHER_00958
6003 CHIEF/train/CHIEF_00684
6003 TOMORROW/train/TOMORROW_00609
6003 LITTLE/train/LITTLE_00903
6003 AMERICA/train/AMERICA_00397
6003 SHORT/train/SHORT_00910
6003 CONSERVATIVE/train/CONSERVATIVE_00984
6003 CHANGE/train/CHANGE_00380
6003 CHANCE/train/CHANCE_00238
6003 REPORT/train/REPORT_00098
6003 THINGS/train/THINGS_00674
6003 GROWTH/train/GROWTH_00618
6003 LABOUR/train/LABOUR_00707
6003 GUILTY/train/GUILTY_00504
6003 POWERS/train/POWERS_00012
6003 NUMBER/train/NUMBER_00517
6003 MIDDLE/train/MIDDLE_00149
6003 CLAIMS/train/CLAIMS_00217
6003 CHARGES/train/CHARGES_00532
6003 MIGHT/train/MIGHT_00790
6003 WANTED/train/WANTED_00389
6003 CHARGES/train/CHARGES_00171
6003 CHANCE/train/CHANCE_00075
6003 PRESS/train/PRESS_00751
6003 STATES/train/STATES_00529
6003 RESPONSE/train/RESPONSE_00736
6003 PERHAPS/train/PERHAPS_00100
6003 WOMEN/train/WOMEN_00698
6003 QUESTION/test/QUESTION_00023
6003 BETWEEN/train/BETWEEN_00460
6003 UNITED/train/UNITED_00525
6003 BENEFIT/train/BENEFIT_00645
6003 CHINA/train/CHINA_00066
6003 WEEKS/train/WEEKS_00424
6003 STORY/train/STORY_00824
6003 HAVING/train/HAVING_00633
6003 QUESTION/train/QUESTION_00076
6003 THING/train/THING_00203
6003 SMALL/train/SMALL_00286
6003 VIOLENCE/train/VIOLENCE_00775
6003 SPENT/train/SPENT_00227
6003 ALREADY/train/ALREADY_00033
6003 WOMEN/train/WOMEN_00780
6003 MORNING/train/MORNING_00244
6003 BETWEEN/train/BETWEEN_00824
6003 DIFFERENCE/train/DIFFERENCE_00771
6003 WHETHER/train/WHETHER_00993
6003 BEFORE/train/BEFORE_00972
6003 POSSIBLE/train/POSSIBLE_00456
6003 INFLATION/train/INFLATION_00105
6003 BUSINESS/train/BUSINESS_00198
6003 LARGE/train/LARGE_00838
6003 MINISTER/train/MINISTER_00508
6003 SEEMS/train/SEEMS_00338
6003 GIVEN/train/GIVEN_00462
6003 PRISON/train/PRISON_00031
6003 EDUCATION/train/EDUCATION_00044
6003 TALKING/train/TALKING_00432
6003 CHINA/train/CHINA_00840
6003 GEORGE/train/GEORGE_00666
6003 UNION/train/UNION_00218
6003 MEDICAL/train/MEDICAL_00631
6003 TRYING/train/TRYING_00394
6003 CHANGE/train/CHANGE_00662
6003 SOMETHING/train/SOMETHING_00053
6003 THREAT/train/THREAT_00450
6003 ACCUSED/train/ACCUSED_00007
6003 SOMETHING/train/SOMETHING_00546
6003 WATER/train/WATER_00897
6003 CONFERENCE/train/CONFERENCE_00436
6003 PRICES/train/PRICES_00531
6003 TOMORROW/train/TOMORROW_00897
6003 EDITOR/train/EDITOR_00416
6003 SECRETARY/train/SECRETARY_00874
6003 STAND/train/STAND_00575
6003 POTENTIAL/train/POTENTIAL_00244
6003 LABOUR/train/LABOUR_00894
6003 MIDDLE/train/MIDDLE_00459
6003 MIDDLE/train/MIDDLE_00137
6003 SPENT/train/SPENT_00042
6003 UNDER/train/UNDER_00577
6003 ALLEGATIONS/train/ALLEGATIONS_00189
6003 SYRIAN/train/SYRIAN_00150
6003 ANSWER/train/ANSWER_00614
6003 TIMES/train/TIMES_00452
6003 MOMENT/train/MOMENT_00918
6003 EASTERN/train/EASTERN_00998
6003 PARTY/train/PARTY_00651
6003 RESULT/train/RESULT_00467
6003 PRIME/train/PRIME_00627
6003 EASTERN/train/EASTERN_00415
6003 PARTY/train/PARTY_00585
6003 FUTURE/train/FUTURE_00681
6003 EDUCATION/train/EDUCATION_00563
6003 ANOTHER/train/ANOTHER_00891
6003 MAKING/train/MAKING_00174
6003 WESTERN/train/WESTERN_00704
6003 TERMS/train/TERMS_00114
6003 PLANS/train/PLANS_00836
6003 RIGHTS/train/RIGHTS_00593
6003 WEAPONS/train/WEAPONS_00296
6003 ALLOW/train/ALLOW_00797
6003 WRONG/train/WRONG_00272
6003 AMERICAN/train/AMERICAN_00531
6003 BORDER/train/BORDER_00408
6003 ASKING/train/ASKING_00009
6003 FIGHT/train/FIGHT_00870
6003 MESSAGE/train/MESSAGE_00802
6003 SOMEONE/train/SOMEONE_00117
6003 RECENT/train/RECENT_00864
6003 ECONOMY/train/ECONOMY_00680
6003 REASON/train/REASON_00399
6003 EDITOR/train/EDITOR_00294
6003 THERE/train/THERE_00195
6003 GREECE/train/GREECE_00819
6003 LEADER/train/LEADER_00849
6003 FORCE/train/FORCE_00742
6003 ANOTHER/train/ANOTHER_00043
6003 VICTIMS/train/VICTIMS_00200
6003 SENIOR/train/SENIOR_00114
6003 SOMEONE/train/SOMEONE_00487
6003 ENOUGH/train/ENOUGH_00788
6003 REFERENDUM/train/REFERENDUM_00210
6003 WATER/train/WATER_00827
6003 SYRIA/train/SYRIA_00287
6003 IMMIGRATION/train/IMMIGRATION_00162
6003 CONSERVATIVE/train/CONSERVATIVE_00281
6003 OPERATION/train/OPERATION_00553
6003 THREE/train/THREE_00011
6003 BETWEEN/train/BETWEEN_00828
6003 TAKING/train/TAKING_00765
6003 NEVER/train/NEVER_00458
6003 TOGETHER/train/TOGETHER_00261
6003 EXPECT/train/EXPECT_00207
6003 REALLY/train/REALLY_00104
6003 FOREIGN/train/FOREIGN_00433
6003 SOCIAL/train/SOCIAL_00553
6003 MILITARY/train/MILITARY_00321
6003 NIGHT/train/NIGHT_00447
6003 FINANCIAL/train/FINANCIAL_00572
6003 PRICE/train/PRICE_00262
6003 WANTS/train/WANTS_00182
6003 BUILDING/train/BUILDING_00234
6003 VOTERS/train/VOTERS_00776
6003 MIGHT/train/MIGHT_00149
6003 INVOLVED/train/INVOLVED_00666
6003 CONFERENCE/train/CONFERENCE_00049
6003 EDUCATION/train/EDUCATION_00281
6003 WHETHER/train/WHETHER_00288
6003 MONTHS/train/MONTHS_00913
6003 INFORMATION/train/INFORMATION_00708
6003 RATES/train/RATES_00369
6003 RETURN/train/RETURN_00339
6003 UNION/train/UNION_00254
6003 GEORGE/train/GEORGE_00050
6003 THEIR/train/THEIR_00842
6003 EVENING/train/EVENING_00168
6003 WITHOUT/train/WITHOUT_00776
6003 THEIR/train/THEIR_00135
6003 YOUNG/train/YOUNG_00099
6003 THINGS/train/THINGS_00899
6003 THREE/train/THREE_00350
6003 POWER/train/POWER_00039
6003 PUBLIC/train/PUBLIC_00333
6003 STREET/train/STREET_00717
6003 BUILDING/train/BUILDING_00552
6003 TRIAL/train/TRIAL_00258
6003 ALLOW/train/ALLOW_00698
6003 POWER/train/POWER_00438
6003 ACTION/train/ACTION_00164
6003 REASON/train/REASON_00674
6003 LABOUR/train/LABOUR_00621
6003 GROWING/train/GROWING_00044
6003 CHARGE/train/CHARGE_00150
6003 TRIAL/train/TRIAL_00473
6003 CONFLICT/train/CONFLICT_00598
6003 COMPANIES/train/COMPANIES_00228
6003 JAMES/train/JAMES_00425
6003 BEFORE/train/BEFORE_00759
6003 STORY/train/STORY_00734
6003 SEVERAL/train/SEVERAL_00406
6003 RETURN/train/RETURN_00063
6003 TOGETHER/train/TOGETHER_00895
6003 ALWAYS/train/ALWAYS_00169
6003 BETTER/train/BETTER_00140
6003 SEVERAL/train/SEVERAL_00321
6003 TONIGHT/train/TONIGHT_00047
6003 HAPPENED/train/HAPPENED_00464
6003 RULES/train/RULES_00048
6003 STATE/train/STATE_00125
6003 RULES/train/RULES_00426
6003 BIGGEST/train/BIGGEST_00218
6003 WESTERN/train/WESTERN_00487
6003 OUTSIDE/train/OUTSIDE_00796
6003 CHINA/train/CHINA_00534
6003 FRENCH/train/FRENCH_00995
6003 DOING/train/DOING_00803
6003 VIOLENCE/train/VIOLENCE_00123
6003 OFFICIALS/train/OFFICIALS_00880
6003 LIVING/train/LIVING_00572
6003 HUMAN/train/HUMAN_00220
6003 SEVEN/train/SEVEN_00836
6003 CONFERENCE/train/CONFERENCE_00500
6003 FIRST/train/FIRST_00072
6003 UNDERSTAND/train/UNDERSTAND_00556
6003 UNTIL/train/UNTIL_00460
6003 AMONG/train/AMONG_00637
6003 ANNOUNCED/train/ANNOUNCED_00051
6003 SMALL/train/SMALL_00421
6003 MAJOR/train/MAJOR_00443
6003 WITHOUT/train/WITHOUT_00126
6003 REPORTS/train/REPORTS_00307
6003 INFORMATION/train/INFORMATION_00784
6003 COMES/train/COMES_00917
6003 POLICE/train/POLICE_00534
6003 LONDON/train/LONDON_00005
6003 SAYING/train/SAYING_00787
6003 EUROPEAN/train/EUROPEAN_00269
6003 LEGAL/train/LEGAL_00734
6003 WHETHER/train/WHETHER_00760
6003 MIGRANTS/train/MIGRANTS_00789
6003 WHILE/train/WHILE_00718
6003 GIVEN/train/GIVEN_00541
6003 FORCE/train/FORCE_00294
6003 MONEY/train/MONEY_00439
6003 ANSWER/train/ANSWER_00879
6003 EUROPEAN/train/EUROPEAN_00668
6003 CHINA/train/CHINA_00849
6003 LEADER/train/LEADER_00219
6003 EDITOR/train/EDITOR_00445
6003 YEARS/train/YEARS_00791
6003 CONFERENCE/train/CONFERENCE_00775
6003 ACCORDING/train/ACCORDING_00599
6003 DESPITE/train/DESPITE_00254
6003 WORDS/train/WORDS_00639
6003 MAYBE/train/MAYBE_00186
6003 LIKELY/train/LIKELY_00376
6003 EDITOR/train/EDITOR_00871
6003 SHORT/train/SHORT_00590
6003 SPENT/train/SPENT_00131
6003 OPPOSITION/train/OPPOSITION_00181
6003 DEGREES/train/DEGREES_00936
6003 TOMORROW/train/TOMORROW_00002
6003 ISSUE/train/ISSUE_00731
6003 ENOUGH/train/ENOUGH_00759
6003 PERHAPS/train/PERHAPS_00183
6003 ECONOMIC/train/ECONOMIC_00122
6003 YOUNG/train/YOUNG_00395
6003 ALLEGATIONS/train/ALLEGATIONS_00698
6003 START/train/START_00126
6003 WRONG/train/WRONG_00794
6003 TONIGHT/train/TONIGHT_00132
6003 TODAY/train/TODAY_00363
6003 SHORT/train/SHORT_00782
6003 WOMEN/train/WOMEN_00392
6003 WITHIN/train/WITHIN_00185
6003 CHILDREN/train/CHILDREN_00618
6003 PUBLIC/train/PUBLIC_00849
6003 CONTINUE/train/CONTINUE_00343
6003 ANOTHER/train/ANOTHER_00980
6003 MILLIONS/train/MILLIONS_00439
6003 THEIR/train/THEIR_00502
6003 PARTIES/train/PARTIES_00747
6003 SERIOUS/train/SERIOUS_00354
6003 MIGHT/train/MIGHT_00595
6003 CONFERENCE/train/CONFERENCE_00105
6003 MINISTERS/train/MINISTERS_00291
6003 PRESS/train/PRESS_00860
6003 HAVING/train/HAVING_00875
6003 HAPPEN/train/HAPPEN_00713
6003 ITSELF/train/ITSELF_00548
6003 BRITAIN/train/BRITAIN_00986
6003 GERMANY/train/GERMANY_00898
6003 SENIOR/train/SENIOR_00585
6003 HISTORY/train/HISTORY_00467
6003 GIVEN/train/GIVEN_00865
6003 UNITED/train/UNITED_00817
6003 SPEECH/train/SPEECH_00774
6003 AFFAIRS/train/AFFAIRS_00592
6003 PRESIDENT/train/PRESIDENT_00329
6003 VIOLENCE/train/VIOLENCE_00801
6003 GROWING/train/GROWING_00580
6003 ANNOUNCED/train/ANNOUNCED_00503
6003 PRESIDENT/train/PRESIDENT_00278
6003 BEING/train/BEING_00339
6003 EVERY/train/EVERY_00557
6003 ANNOUNCED/train/ANNOUNCED_00456
6003 COMPANY/train/COMPANY_00275
6003 LIVING/train/LIVING_00766
6003 BORDER/train/BORDER_00563
6003 ABUSE/train/ABUSE_00099
6003 MEMBERS/train/MEMBERS_00367
6003 BEHIND/train/BEHIND_00330
6003 NUMBERS/train/NUMBERS_00395
6003 GROWING/train/GROWING_00642
6003 MEDIA/train/MEDIA_00654
6003 HEART/train/HEART_00420
6003 UNDERSTAND/train/UNDERSTAND_00720
6003 TALKING/train/TALKING_00482
6003 LEAVE/train/LEAVE_00262
6003 QUITE/train/QUITE_00549
6003 LARGE/train/LARGE_00430
6003 COURSE/train/COURSE_00604
6003 CAMERON/train/CAMERON_00301
6003 IMPORTANT/train/IMPORTANT_00621
6003 SEEMS/train/SEEMS_00719
6003 PRIME/train/PRIME_00488
6003 ACCUSED/train/ACCUSED_00293
6003 SPEND/train/SPEND_00819
6003 WORLD/train/WORLD_00936
6003 CHIEF/train/CHIEF_00136
6003 PLACES/train/PLACES_00766
6003 DEBATE/train/DEBATE_00328
6003 AHEAD/train/AHEAD_00224
6003 PROTECT/train/PROTECT_00504
6003 MINISTER/train/MINISTER_00258
6003 MATTER/train/MATTER_00389
6003 DOING/train/DOING_00297
6003 FIGURES/train/FIGURES_00442
6003 CHARGE/train/CHARGE_00528
6003 CAPITAL/train/CAPITAL_00786
6003 ENERGY/train/ENERGY_00079
6003 PLACE/train/PLACE_00402
6003 CLEAR/train/CLEAR_00948
6003 NUMBERS/train/NUMBERS_00590
6003 UNION/train/UNION_00812
6003 SYRIA/train/SYRIA_00309
6003 EXPECT/train/EXPECT_00036
6003 HOMES/train/HOMES_00593
6003 SECRETARY/train/SECRETARY_00033
6003 ITSELF/train/ITSELF_00780
6003 SUNDAY/train/SUNDAY_00413
6003 PLACE/train/PLACE_00047
6003 FUTURE/train/FUTURE_00448
6003 SECURITY/train/SECURITY_00109
6003 HAVING/train/HAVING_00584
6003 REASON/train/REASON_00299
6003 SOMEONE/train/SOMEONE_00856
6003 BENEFITS/train/BENEFITS_00021
6003 WORDS/train/WORDS_00780
6003 PATIENTS/train/PATIENTS_00353
6003 ACCORDING/train/ACCORDING_00633
6003 ENERGY/train/ENERGY_00626
6003 PERSONAL/train/PERSONAL_00262
6003 EXPECT/train/EXPECT_00206
6003 WHILE/train/WHILE_00242
6003 EDUCATION/train/EDUCATION_00296
6003 RESULT/train/RESULT_00673
6003 CHANCE/train/CHANCE_00256
6003 TIMES/train/TIMES_00234
6003 OFTEN/train/OFTEN_00130
6003 ACCESS/train/ACCESS_00119
6003 AREAS/train/AREAS_00110
6003 BRITISH/train/BRITISH_00050
6003 FORWARD/train/FORWARD_00930
6003 MAJOR/train/MAJOR_00972
6003 AMERICA/train/AMERICA_00573
6003 SCHOOL/train/SCHOOL_00999
6003 MASSIVE/train/MASSIVE_00748
6003 CHILDREN/train/CHILDREN_00822
6003 SHORT/train/SHORT_00996
6003 STAND/train/STAND_00083
6003 FIRST/train/FIRST_00597
6003 MOVING/train/MOVING_00632
6003 ACTUALLY/train/ACTUALLY_00830
6003 GENERAL/train/GENERAL_00029
6003 UNION/train/UNION_00301
6003 DIFFERENT/train/DIFFERENT_00728
6003 ECONOMY/train/ECONOMY_00043
6003 SPEND/train/SPEND_00690
6003 QUESTIONS/train/QUESTIONS_00784
6003 CHANGES/train/CHANGES_00938
6003 COUNTRIES/train/COUNTRIES_00778
6003 WORLD/train/WORLD_00598
6003 RECENT/train/RECENT_00076
6003 PATIENTS/train/PATIENTS_00039
6003 HISTORY/train/HISTORY_00025
6003 AMERICA/train/AMERICA_00590
6003 POLITICAL/train/POLITICAL_00154
6003 INTEREST/train/INTEREST_00251
6003 RECENT/train/RECENT_00442
6003 COUNTRY/train/COUNTRY_00241
6003 THEMSELVES/train/THEMSELVES_00215
6003 PHONE/train/PHONE_00187
6003 BENEFITS/train/BENEFITS_00927
6003 LOCAL/train/LOCAL_00351
6003 BROUGHT/train/BROUGHT_00132
6003 PRETTY/train/PRETTY_00975
6003 POSSIBLE/train/POSSIBLE_00318
6003 BETWEEN/train/BETWEEN_00936
6003 BENEFIT/train/BENEFIT_00162
6003 LONGER/train/LONGER_00275
6003 SIMPLY/train/SIMPLY_00344
6003 WHETHER/train/WHETHER_00750
6003 STORY/train/STORY_00680
6003 OTHER/train/OTHER_00724
6003 MILLION/train/MILLION_00709
6003 WHICH/train/WHICH_00101
6003 CERTAINLY/train/CERTAINLY_00066
6003 STATE/train/STATE_00038
6003 WHETHER/train/WHETHER_00676
6003 BENEFITS/train/BENEFITS_00315
6003 CHANCE/train/CHANCE_00223
6003 TOWARDS/train/TOWARDS_00772
6003 MOMENT/train/MOMENT_00894
6003 LIVING/train/LIVING_00719
6003 EXPECT/train/EXPECT_00114
6003 WEEKS/train/WEEKS_00521
6003 SCHOOLS/train/SCHOOLS_00417
6003 QUESTIONS/train/QUESTIONS_00060
6003 THEMSELVES/train/THEMSELVES_00004
6003 UNDER/train/UNDER_00633
6003 LEADERSHIP/train/LEADERSHIP_00432
6003 PRICES/train/PRICES_00925
6003 ECONOMY/train/ECONOMY_00333
6003 STATE/train/STATE_00328
6003 ABUSE/train/ABUSE_00708
6003 SECRETARY/train/SECRETARY_00726
6003 TONIGHT/train/TONIGHT_00157
6003 QUESTION/train/QUESTION_00289
6003 MINISTER/train/MINISTER_00050
6003 WEAPONS/train/WEAPONS_00334
6003 GROUP/train/GROUP_00128
6003 ALREADY/train/ALREADY_00795
6003 DAVID/train/DAVID_00498
6003 FOCUS/train/FOCUS_00479
6003 WITHOUT/train/WITHOUT_00073
6003 MOMENT/train/MOMENT_00984
6003 HAPPEN/train/HAPPEN_00743
6003 NEVER/train/NEVER_00641
6003 AGAIN/train/AGAIN_00202
6003 UNDER/train/UNDER_00078
6003 MILLIONS/train/MILLIONS_00633
6003 AMONG/train/AMONG_00896
6003 ALMOST/train/ALMOST_00447
6003 STATES/train/STATES_00486
6003 YOUNG/train/YOUNG_00494
6003 JUDGE/train/JUDGE_00750
6003 GROUP/train/GROUP_00165
6003 MILITARY/train/MILITARY_00520
6003 CONFERENCE/train/CONFERENCE_00708
6003 SCHOOLS/train/SCHOOLS_00409
6003 ISSUE/train/ISSUE_00289
6003 AMERICAN/train/AMERICAN_00598
6003 SPENT/train/SPENT_00884
6003 EVENTS/train/EVENTS_00130
6003 STILL/train/STILL_00421
6003 PAYING/train/PAYING_00422
6003 EVERY/train/EVERY_00845
6003 WOMEN/train/WOMEN_00479
6003 MURDER/train/MURDER_00733
6003 THEMSELVES/train/THEMSELVES_00424
6003 TODAY/train/TODAY_00898
6003 CASES/train/CASES_00412
6003 OPPOSITION/train/OPPOSITION_00509
6003 LEADERSHIP/train/LEADERSHIP_00694
6003 LONDON/train/LONDON_00789
6003 MAYBE/train/MAYBE_00907
6003 SECRETARY/train/SECRETARY_00634
6003 AFTER/train/AFTER_00025
6003 GROUND/train/GROUND_00555
6003 ANSWER/train/ANSWER_00051
6003 STREET/train/STREET_00033
6003 PARLIAMENT/train/PARLIAMENT_00196
6003 STATE/train/STATE_00339
6003 SPEND/train/SPEND_00834
6003 STAND/train/STAND_00176
6003 RATHER/train/RATHER_00325
6003 TALKS/train/TALKS_00344
6003 POLITICAL/train/POLITICAL_00387
6003 ENOUGH/train/ENOUGH_00475
6003 THINGS/train/THINGS_00412
6003 PROVIDE/train/PROVIDE_00287
6003 VOTERS/train/VOTERS_00790
6003 TRUST/train/TRUST_00741
6003 TOMORROW/train/TOMORROW_00744
6003 OBAMA/train/OBAMA_00067
6003 STATEMENT/train/STATEMENT_00936
6003 ECONOMY/train/ECONOMY_00120
6003 SOMETHING/train/SOMETHING_00775
6003 ANYTHING/train/ANYTHING_00375
6003 OBAMA/train/OBAMA_00422
6003 FORWARD/train/FORWARD_00808
6003 RUSSIAN/train/RUSSIAN_00021
6003 ANOTHER/train/ANOTHER_00421
6003 COURT/train/COURT_00443
6003 WOMEN/train/WOMEN_00381
6003 NORTH/train/NORTH_00457
6003 BELIEVE/train/BELIEVE_00587
6003 FRANCE/train/FRANCE_00967
6003 RATHER/train/RATHER_00149
6003 ANOTHER/train/ANOTHER_00475
6003 BILLION/train/BILLION_00924
6003 BRITAIN/train/BRITAIN_00669
6003 BECAUSE/train/BECAUSE_00721
6003 THREAT/train/THREAT_00625
6003 MINISTERS/train/MINISTERS_00664
6003 WATCHING/train/WATCHING_00161
6003 SOUTH/train/SOUTH_00413
6003 CHANGE/train/CHANGE_00511
6003 OPERATION/train/OPERATION_00771
6003 AROUND/train/AROUND_00145
6003 THEIR/train/THEIR_00482
6003 DECIDED/train/DECIDED_00118
6003 DECIDED/train/DECIDED_00555
6003 OTHERS/train/OTHERS_00457
6003 BUILDING/train/BUILDING_00130
6003 FIGURES/train/FIGURES_00404
6003 ANNOUNCED/train/ANNOUNCED_00025
6003 COURT/train/COURT_00044
6003 PRESS/train/PRESS_00514
6003 WEAPONS/train/WEAPONS_00887
6003 WELCOME/train/WELCOME_00224
6003 QUESTION/train/QUESTION_00937
6003 AFFAIRS/val/AFFAIRS_00006
6003 TODAY/train/TODAY_00934
6003 DESPITE/train/DESPITE_00189
6003 RUSSIA/train/RUSSIA_00727
6003 LEVEL/train/LEVEL_00974
6003 TRADE/train/TRADE_00667
6003 TALKING/train/TALKING_00467
6003 KNOWN/train/KNOWN_00520
6003 CONFERENCE/train/CONFERENCE_00726
6003 HIGHER/train/HIGHER_00062
6003 OUTSIDE/train/OUTSIDE_00624
6003 ALLOWED/train/ALLOWED_00632
6003 COMMUNITY/train/COMMUNITY_00727
6003 WEAPONS/train/WEAPONS_00103
6003 QUESTIONS/train/QUESTIONS_00461
6003 MAYBE/train/MAYBE_00498
6003 CLAIMS/train/CLAIMS_00641
6003 GEORGE/train/GEORGE_00187
6003 ASKING/train/ASKING_00067
6003 SERVICE/train/SERVICE_00689
6003 WEAPONS/train/WEAPONS_00699
6003 SCHOOL/train/SCHOOL_00589
6003 COULD/train/COULD_00328
6003 SEEMS/train/SEEMS_00155
6003 WEAPONS/train/WEAPONS_00993
6003 WEEKS/train/WEEKS_00912
6003 JUSTICE/train/JUSTICE_00541
6003 ENERGY/train/ENERGY_00385
6003 POWER/train/POWER_00127
6003 WHICH/train/WHICH_00972
6003 SINCE/train/SINCE_00661
6003 FOUND/train/FOUND_00533
6003 MILITARY/train/MILITARY_00145
6003 FUTURE/train/FUTURE_00356
6003 ANSWER/train/ANSWER_00323
6003 CASES/train/CASES_00940
6003 TALKING/train/TALKING_00031
6003 MEETING/train/MEETING_00968
6003 GROUND/train/GROUND_00779
6003 FIRST/train/FIRST_00552
6003 BUDGET/train/BUDGET_00958
6003 CHALLENGE/train/CHALLENGE_00710
6003 MARKET/train/MARKET_00216
6003 SENIOR/train/SENIOR_00192
6003 MONTHS/train/MONTHS_00306
6003 ARRESTED/train/ARRESTED_00961
6003 VIOLENCE/train/VIOLENCE_00726
6003 PRETTY/train/PRETTY_00882
6003 COURSE/train/COURSE_00187
6003 BROUGHT/train/BROUGHT_00406
6003 PAYING/train/PAYING_00317
6003 WRONG/train/WRONG_00381
6003 SPENT/train/SPENT_00786
6003 CANNOT/train/CANNOT_00431
7184 EMERGENCY/train/EMERGENCY_00475
7184 STATES/val/STATES_00033
7184 WARNING/train/WARNING_00610
7184 STATE/train/STATE_00053
7184 GREECE/train/GREECE_00622
7184 INTEREST/train/INTEREST_00983
7184 CANCER/train/CANCER_00029
7184 SERIOUS/train/SERIOUS_00469
7184 COUNCIL/train/COUNCIL_00628
7184 UNTIL/train/UNTIL_00534
7184 HOMES/val/HOMES_00031
7184 HAVING/train/HAVING_00238
7184 RESPONSE/train/RESPONSE_00323
7184 MIGHT/val/MIGHT_00008
7184 SMALL/val/SMALL_00006
7184 MEDIA/train/MEDIA_00996
7184 KILLED/val/KILLED_00025
7184 CONFERENCE/val/CONFERENCE_00007
7184 HOMES/train/HOMES_00565
7184 AUTHORITIES/train/AUTHORITIES_00829
7184 STAND/val/STAND_00022
7184 INVESTMENT/train/INVESTMENT_00309
7184 ISLAMIC/train/ISLAMIC_00198
7184 FIGHTING/train/FIGHTING_00769
7184 PRIME/train/PRIME_00188
7184 ANNOUNCED/train/ANNOUNCED_00546
7184 MEETING/train/MEETING_00986
7184 CHINA/train/CHINA_00480
7184 GENERAL/train/GENERAL_00543
7184 AREAS/train/AREAS_00220
7184 CHANGES/train/CHANGES_00866
7184 RECENT/train/RECENT_00771
7184 TAKEN/train/TAKEN_00603
7184 STATE/train/STATE_00147
7184 THIRD/train/THIRD_00964
7184 MINISTERS/train/MINISTERS_00653
7184 CHANGE/test/CHANGE_00045
7184 LEADER/train/LEADER_00984
7184 PRESS/train/PRESS_00083
7184 ANOTHER/train/ANOTHER_00498
7184 WEEKS/train/WEEKS_00749
7184 WHOLE/train/WHOLE_00103
7184 LIVES/train/LIVES_00884
7184 TODAY/train/TODAY_00673
7184 SHORT/train/SHORT_00217
7184 WHERE/val/WHERE_00008
7184 SHOULD/train/SHOULD_00772
7184 RIGHT/train/RIGHT_00582
7184 BRING/train/BRING_00271
7184 BRING/train/BRING_00727
7184 SHORT/train/SHORT_00742
7184 UNITED/train/UNITED_00567
7184 KNOWN/val/KNOWN_00006
7184 INDUSTRY/train/INDUSTRY_00771
7184 LOCAL/val/LOCAL_00012
7184 PRESIDENT/train/PRESIDENT_00147
7184 LITTLE/test/LITTLE_00005
7184 SCHOOL/train/SCHOOL_00289
7184 WITHOUT/train/WITHOUT_00226
7184 FRENCH/test/FRENCH_00033
7184 EDUCATION/train/EDUCATION_00461
7184 GROWTH/train/GROWTH_00151
7184 PUBLIC/train/PUBLIC_00871
7184 MORNING/train/MORNING_00019
7184 RESPONSE/train/RESPONSE_00334
7184 BEING/train/BEING_00699
7184 VOTERS/train/VOTERS_00333
7184 HEALTH/train/HEALTH_00813
7184 FACING/train/FACING_00026
7184 INDUSTRY/train/INDUSTRY_00841
7184 DESCRIBED/train/DESCRIBED_00868
7184 SECOND/train/SECOND_00323
7184 MINUTES/train/MINUTES_00873
7184 AREAS/test/AREAS_00026
7184 STRONG/train/STRONG_00088
7184 PRESIDENT/train/PRESIDENT_00833
7184 DESPITE/train/DESPITE_00599
7184 FURTHER/train/FURTHER_00144
7184 CHANCE/test/CHANCE_00007
7184 WHILE/val/WHILE_00032
7184 CANNOT/test/CANNOT_00026
7184 JAMES/train/JAMES_00604
7184 MURDER/train/MURDER_00337
7184 VOTERS/train/VOTERS_00844
7184 COUNTRIES/train/COUNTRIES_00166
7184 FRENCH/val/FRENCH_00032
7184 WORKERS/train/WORKERS_00950
7184 STRONG/train/STRONG_00735
7184 AFRICA/val/AFRICA_00047
7184 OPERATION/train/OPERATION_00619
7184 GREECE/train/GREECE_00633
7184 GIVEN/train/GIVEN_00021
7184 FRIDAY/train/FRIDAY_00962
7184 TRIAL/train/TRIAL_00923
7184 GEORGE/train/GEORGE_00818
7184 SERIES/train/SERIES_00073
7184 SECRETARY/test/SECRETARY_00009
7184 AMERICA/train/AMERICA_00697
7184 LEAVE/train/LEAVE_00941
7184 INVOLVED/test/INVOLVED_00002
7184 MISSING/train/MISSING_00670
7184 SPEECH/train/SPEECH_00130
7184 ABOUT/test/ABOUT_00003
7184 MILLION/train/MILLION_00089
7184 SERVICE/train/SERVICE_00005
7184 GROWING/val/GROWING_00038
7184 HOUSING/val/HOUSING_00010
7184 LONDON/test/LONDON_00040
7184 CANCER/train/CANCER_00648
7184 RESPONSE/train/RESPONSE_00180
7184 COURT/train/COURT_00879
7184 STARTED/train/STARTED_00978
7184 FRIDAY/train/FRIDAY_00545
7184 LEVELS/train/LEVELS_00537
7184 AMERICA/test/AMERICA_00048
7184 THIRD/train/THIRD_00440
7184 THIRD/val/THIRD_00039
7184 WORST/train/WORST_00752
7184 ACCORDING/train/ACCORDING_00867
7184 WESTERN/train/WESTERN_00991
7184 REPORT/train/REPORT_00089
7184 MIGRANTS/train/MIGRANTS_00528
7184 PARENTS/train/PARENTS_00587
7184 RIGHT/test/RIGHT_00050
7184 IMPACT/train/IMPACT_00257
7184 COUPLE/test/COUPLE_00045
7184 STAND/train/STAND_00707
7184 WESTMINSTER/train/WESTMINSTER_00828
7184 COMPANY/val/COMPANY_00015
7184 WALES/train/WALES_00171
7184 EDUCATION/val/EDUCATION_00003
7184 SOUTH/train/SOUTH_00013
7184 HEALTH/train/HEALTH_00205
7184 SUNDAY/train/SUNDAY_00482
7184 SERVICE/train/SERVICE_00586
7184 SERIES/train/SERIES_00425
7184 YOUNG/train/YOUNG_00906
7184 COMMUNITY/train/COMMUNITY_00256
7184 VIOLENCE/train/VIOLENCE_00516
7184 SPEAKING/train/SPEAKING_00668
7184 FINAL/train/FINAL_00599
7184 GENERAL/train/GENERAL_00245
7184 OUTSIDE/train/OUTSIDE_00817
7184 MINISTERS/train/MINISTERS_00976
7184 CRISIS/train/CRISIS_00625
7184 USING/test/USING_00017
7184 ENERGY/train/ENERGY_00215
7184 ACCESS/train/ACCESS_00994
7184 MISSING/train/MISSING_00779
7184 SIGNIFICANT/test/SIGNIFICANT_00042
7184 MEDICAL/test/MEDICAL_00001
7184 WESTMINSTER/train/WESTMINSTER_00233
7184 MINISTERS/val/MINISTERS_00017
7184 WESTMINSTER/train/WESTMINSTER_00446
7184 FORMER/train/FORMER_00818
7184 SECRETARY/train/SECRETARY_00592
7184 UNITED/train/UNITED_00825
7184 INQUIRY/train/INQUIRY_00937
7184 DEATH/train/DEATH_00976
7184 ACCORDING/train/ACCORDING_00659
7184 SENIOR/train/SENIOR_00355
7184 MEASURES/train/MEASURES_00555
7184 CAMERON/train/CAMERON_00920
7184 AMOUNT/train/AMOUNT_00631
7184 THOUGHT/val/THOUGHT_00036
7184 FORMER/train/FORMER_00561
7184 FINANCIAL/train/FINANCIAL_00662
7184 TONIGHT/train/TONIGHT_00262
7184 FURTHER/train/FURTHER_00411
7184 CHIEF/train/CHIEF_00491
7184 ENERGY/train/ENERGY_00437
7184 MEMBERS/train/MEMBERS_00582
7184 STORY/train/STORY_00453
7184 CHANGES/train/CHANGES_00287
7184 INDUSTRY/val/INDUSTRY_00040
7184 PRESIDENT/train/PRESIDENT_00679
7184 MINUTES/train/MINUTES_00343
7184 VICTIMS/train/VICTIMS_00578
7184 PARENTS/train/PARENTS_00372
7184 THIRD/train/THIRD_00749
7184 ANOTHER/train/ANOTHER_00050
7184 INDUSTRY/train/INDUSTRY_00475
7184 MASSIVE/train/MASSIVE_00721
7184 MAKES/test/MAKES_00044
7184 EUROPE/train/EUROPE_00189
7184 GENERAL/val/GENERAL_00001
7184 MORNING/val/MORNING_00039
7184 FRIDAY/train/FRIDAY_00492
7184 LATEST/train/LATEST_00054
7184 WARNING/train/WARNING_00262
7184 OFFICIALS/train/OFFICIALS_00952
7184 THIRD/train/THIRD_00281
7184 WESTMINSTER/train/WESTMINSTER_00584
7184 THOUSANDS/val/THOUSANDS_00026
7184 SECTOR/train/SECTOR_00936
7184 WORKERS/train/WORKERS_00312
7184 MAYBE/val/MAYBE_00022
7184 VICTIMS/train/VICTIMS_00466
7184 SCOTTISH/train/SCOTTISH_00785
7184 SCHOOLS/test/SCHOOLS_00043
7184 MANCHESTER/train/MANCHESTER_00127
7184 LIVES/train/LIVES_00025
7184 INDUSTRY/train/INDUSTRY_00410
7184 SINCE/train/SINCE_00806
7184 BECOME/train/BECOME_00092
7184 PLACES/test/PLACES_00040
7184 THERE/train/THERE_00141
7184 ANNOUNCED/train/ANNOUNCED_00552
7184 CANCER/train/CANCER_00102
7184 PEOPLE/train/PEOPLE_00971
7184 EVIDENCE/train/EVIDENCE_00485
7184 THOUSANDS/train/THOUSANDS_00739
7184 TERMS/train/TERMS_00628
7184 FRANCE/train/FRANCE_00181
7184 TAKEN/train/TAKEN_00861
7184 MORNING/train/MORNING_00539
7184 CAMERON/train/CAMERON_00672
7184 SOUTH/train/SOUTH_00528
7184 KNOWN/train/KNOWN_00647
7184 MONTH/train/MONTH_00039
7184 SYRIAN/train/SYRIAN_00127
7184 ACCUSED/train/ACCUSED_00748
7184 UNITED/train/UNITED_00371
7184 SEVEN/test/SEVEN_00032
7184 PRICE/train/PRICE_00257
7184 OFFICE/train/OFFICE_00076
7184 CHALLENGE/val/CHALLENGE_00028
7184 DESCRIBED/train/DESCRIBED_00853
7184 ACCUSED/train/ACCUSED_00411
7184 PLACE/test/PLACE_00017
7184 EUROPE/train/EUROPE_00708
7184 KNOWN/test/KNOWN_00029
7184 WITHIN/train/WITHIN_00139
7184 REPORTS/train/REPORTS_00039
7184 PLACES/train/PLACES_00096
7184 STORY/train/STORY_00127
7184 CHIEF/train/CHIEF_00705
7184 WALES/train/WALES_00584
7184 SCHOOLS/train/SCHOOLS_00788
7184 FORMER/train/FORMER_00081
7184 FIGHT/train/FIGHT_00970
7184 SEVERAL/train/SEVERAL_00072
7184 GIVING/train/GIVING_00306
7184 MONEY/train/MONEY_00387
7184 PROTECT/train/PROTECT_00002
7184 SPEAKING/train/SPEAKING_00015
7184 CONTROL/train/CONTROL_00863
7184 ALMOST/train/ALMOST_00162
7184 STAFF/train/STAFF_00263
7184 LIKELY/train/LIKELY_00581
7184 ACCORDING/val/ACCORDING_00044
7184 LEADERSHIP/train/LEADERSHIP_00687
7184 VICTIMS/train/VICTIMS_00997
7184 AGREEMENT/train/AGREEMENT_00092
7184 SERIES/train/SERIES_00785
7184 HEALTH/train/HEALTH_00609
7184 AREAS/val/AREAS_00043
7184 SUNDAY/train/SUNDAY_00332
7184 TAKEN/train/TAKEN_00660
7184 SYRIAN/train/SYRIAN_00790
7184 CHANGE/test/CHANGE_00008
7184 MEDIA/train/MEDIA_00626
7184 BILLION/val/BILLION_00015
7184 BIGGEST/train/BIGGEST_00481
7184 WANTS/train/WANTS_00405
7184 AMERICA/train/AMERICA_00608
7184 GIVING/train/GIVING_00047
7184 OPERATION/val/OPERATION_00003
7184 CHILDREN/train/CHILDREN_00994
7184 BIGGEST/train/BIGGEST_00659
7184 PRESSURE/train/PRESSURE_00858
7184 COUNTRIES/train/COUNTRIES_00014
7184 BUILD/train/BUILD_00345
7184 BRITISH/train/BRITISH_00700
7184 SMALL/train/SMALL_00217
7184 PARENTS/train/PARENTS_00556
7184 SHOULD/val/SHOULD_00012
7184 ALLOW/train/ALLOW_00794
7184 MEDICAL/test/MEDICAL_00036
7184 LONGER/val/LONGER_00048
7184 DECISION/train/DECISION_00949
7184 LEADERS/test/LEADERS_00024
7184 POWERS/val/POWERS_00025
7184 BANKS/train/BANKS_00197
7184 OFFICIALS/train/OFFICIALS_00903
7184 ATTACK/train/ATTACK_00877
7184 DECIDED/train/DECIDED_00310
7184 MURDER/train/MURDER_00021
7184 MINISTER/train/MINISTER_00529
7184 LIKELY/val/LIKELY_00007
7184 ACCUSED/val/ACCUSED_00010
7184 SOCIAL/train/SOCIAL_00264
7184 VICTIMS/train/VICTIMS_00798
7184 INFORMATION/test/INFORMATION_00013
7184 SINCE/train/SINCE_00582
7184 WELFARE/test/WELFARE_00048
7184 WEEKEND/train/WEEKEND_00288
7184 MILLION/test/MILLION_00007
7184 SERIES/train/SERIES_00590
7184 COUNTRIES/train/COUNTRIES_00763
7184 LIVING/train/LIVING_00482
7184 COUPLE/train/COUPLE_00591
7184 SEVEN/train/SEVEN_00698
7184 THOUSANDS/train/THOUSANDS_00175
7184 INDEPENDENT/train/INDEPENDENT_00293
7184 DESCRIBED/train/DESCRIBED_00480
7184 ASKED/train/ASKED_00489
7184 EUROPE/train/EUROPE_00345
7184 CONCERNS/test/CONCERNS_00044
7184 DECISION/train/DECISION_00427
7184 FIGHTING/test/FIGHTING_00026
7184 DESCRIBED/train/DESCRIBED_00426
7184 SOUTH/train/SOUTH_00919
7184 STREET/train/STREET_00502
7184 WORST/train/WORST_00819
7184 IMPACT/test/IMPACT_00040
7184 PEOPLE/train/PEOPLE_00071
7184 DECIDED/train/DECIDED_00780
7184 STORY/train/STORY_00293
7184 AGAINST/val/AGAINST_00046
7184 MORNING/train/MORNING_00742
7184 PRESSURE/val/PRESSURE_00007
7184 HOSPITAL/train/HOSPITAL_00067
7184 ECONOMY/train/ECONOMY_00537
7184 GERMANY/train/GERMANY_00564
7184 ISLAMIC/val/ISLAMIC_00004
7184 EDUCATION/train/EDUCATION_00278
7184 GIVING/train/GIVING_00620
7184 THREE/train/THREE_00440
7184 PRICES/train/PRICES_00260
7184 AFRICA/train/AFRICA_00836
7184 AMONG/train/AMONG_00760
7184 NIGHT/train/NIGHT_00558
7184 WORST/train/WORST_00442
7184 RECORD/train/RECORD_00864
7184 MINUTES/train/MINUTES_00438
7184 SAYING/train/SAYING_00687
7184 CRIME/val/CRIME_00040
7184 YEARS/val/YEARS_00010
7184 TRADE/train/TRADE_00140
7184 STILL/train/STILL_00720
7184 IRELAND/train/IRELAND_00815
7184 FOUND/train/FOUND_00089
7184 MAJOR/test/MAJOR_00001
7184 PUBLIC/test/PUBLIC_00011
7184 FOREIGN/train/FOREIGN_00753
7184 ISLAMIC/train/ISLAMIC_00468
7184 CANCER/train/CANCER_00093
7184 GETTING/train/GETTING_00694
7184 AMERICA/train/AMERICA_00136
7184 QUESTIONS/train/QUESTIONS_00866
7184 FOUND/train/FOUND_01000
7184 LOCAL/train/LOCAL_00222
7184 ACCUSED/test/ACCUSED_00026
7184 WORKING/train/WORKING_00857
7184 MURDER/train/MURDER_00803
7184 COULD/train/COULD_00095
7184 SERVICE/test/SERVICE_00018
7184 SCOTTISH/train/SCOTTISH_00883
7184 AMOUNT/train/AMOUNT_00350
7184 CAMERON/train/CAMERON_00417
7184 WAITING/train/WAITING_00393
7184 KILLED/train/KILLED_00645
7184 MISSING/train/MISSING_00498
7184 YESTERDAY/train/YESTERDAY_00816
7184 GROUP/train/GROUP_00184
7184 CONFERENCE/test/CONFERENCE_00024
7184 BETTER/train/BETTER_00441
7184 CAPITAL/train/CAPITAL_00844
7184 RESULT/train/RESULT_00373
7184 NATIONAL/train/NATIONAL_00748
7184 AGAINST/train/AGAINST_00762
7184 RATES/train/RATES_00454
7184 WARNING/train/WARNING_00548
7184 MORNING/test/MORNING_00003
7184 USING/train/USING_00605
7184 RESULT/train/RESULT_00316
7184 ACCUSED/train/ACCUSED_00154
7184 CANCER/train/CANCER_00358
7184 COURT/train/COURT_00028
7184 COMING/train/COMING_00190
7184 HEALTH/train/HEALTH_00942
7184 OPERATION/train/OPERATION_00458
7184 MONTHS/train/MONTHS_00508
7184 ATTACK/train/ATTACK_00267
7184 GREAT/train/GREAT_00755
7184 BECOME/train/BECOME_00756
7184 MANCHESTER/test/MANCHESTER_00022
7184 PROVIDE/train/PROVIDE_00278
7184 FORCES/test/FORCES_00036
7184 LEVELS/train/LEVELS_00499
7184 PARENTS/train/PARENTS_00274
7184 KNOWN/train/KNOWN_00048
7184 FIRST/train/FIRST_00284
7184 CONSERVATIVE/test/CONSERVATIVE_00009
7184 STILL/val/STILL_00021
7184 GREECE/train/GREECE_00506
7184 BEING/test/BEING_00002
7184 POLITICIANS/train/POLITICIANS_00717
7184 ALLEGATIONS/train/ALLEGATIONS_00973
7184 HOMES/train/HOMES_00513
7184 ATTACK/train/ATTACK_00554
7184 STREET/train/STREET_00705
7184 EVENTS/train/EVENTS_00305
7184 MILLION/train/MILLION_00942
7184 WHILE/train/WHILE_00503
7184 LIKELY/test/LIKELY_00024
7184 PLANS/test/PLANS_00044
7184 LEADER/train/LEADER_00257
7184 SPEND/train/SPEND_00528
7184 STAND/test/STAND_00009
7184 MAJOR/train/MAJOR_00385
7184 TODAY/train/TODAY_00875
7184 EVERY/train/EVERY_00672
7184 COMPANIES/train/COMPANIES_00378
7184 OFFICE/train/OFFICE_00222
7184 POWER/train/POWER_00505
7184 ENERGY/train/ENERGY_00573
7184 STAGE/train/STAGE_00593
7184 PRESIDENT/val/PRESIDENT_00002
7184 WESTMINSTER/train/WESTMINSTER_00774
7184 FURTHER/val/FURTHER_00037
7184 THREAT/train/THREAT_00996
7184 DIFFERENCE/train/DIFFERENCE_00121
7184 DESPITE/val/DESPITE_00029
7184 FINANCIAL/val/FINANCIAL_00010
7184 THIRD/train/THIRD_00835
7184 PRESSURE/train/PRESSURE_00134
7184 FORMER/train/FORMER_00109
7184 JUDGE/train/JUDGE_00294
7184 WESTERN/train/WESTERN_00818
7184 FIGURES/val/FIGURES_00005
7184 WORKING/train/WORKING_00131
7184 LOCAL/train/LOCAL_00470
7184 SINCE/train/SINCE_00319
7184 CHILD/train/CHILD_00198
7184 MONTH/train/MONTH_00241
7184 AFRICA/train/AFRICA_00778
7184 WHILE/train/WHILE_00719
7184 TAKING/train/TAKING_00979
7184 NUMBERS/train/NUMBERS_00591
7184 EUROPE/test/EUROPE_00044
7184 ANOTHER/train/ANOTHER_00517
7184 OFFICIALS/train/OFFICIALS_00006
7184 MILLIONS/val/MILLIONS_00004
7184 EARLY/train/EARLY_00071
7184 EXPECTED/train/EXPECTED_00403
7184 DECIDED/train/DECIDED_00212
7184 ALMOST/train/ALMOST_00260
7184 RETURN/test/RETURN_00002
7184 TOMORROW/train/TOMORROW_00683
7184 WESTMINSTER/train/WESTMINSTER_00705
7184 CURRENT/test/CURRENT_00001
7184 COMPANY/train/COMPANY_00253
7184 CHILD/train/CHILD_00019
7184 GREAT/train/GREAT_00842
7184 NUMBER/train/NUMBER_00907
7184 MISSING/train/MISSING_00519
7184 WEAPONS/train/WEAPONS_00239
7184 CHANGES/test/CHANGES_00011
7184 MURDER/train/MURDER_00762
7184 OBAMA/val/OBAMA_00027
7184 AHEAD/train/AHEAD_00358
7184 SPEAKING/test/SPEAKING_00001
7184 HEALTH/train/HEALTH_00902
7184 LEADERSHIP/train/LEADERSHIP_00164
7184 PRIVATE/train/PRIVATE_00546
7184 ECONOMIC/train/ECONOMIC_00834
7184 RECORD/train/RECORD_00043
7184 AMERICAN/train/AMERICAN_00031
7184 MURDER/train/MURDER_00049
7184 SIGNIFICANT/train/SIGNIFICANT_00200
7184 SCHOOLS/train/SCHOOLS_00195
7184 LABOUR/train/LABOUR_00399
7184 INCREASE/test/INCREASE_00043
7184 HEAVY/train/HEAVY_00414
7184 THEMSELVES/train/THEMSELVES_00929
7184 JAMES/train/JAMES_00433
7184 MILLIONS/val/MILLIONS_00001
7184 UNION/val/UNION_00009
7184 TAKEN/train/TAKEN_00650
7184 POLITICAL/train/POLITICAL_00174
7184 COMPANY/val/COMPANY_00026
7184 CAPITAL/train/CAPITAL_00650
7184 MINISTERS/val/MINISTERS_00031
7184 WORST/train/WORST_00297
7184 AMONG/train/AMONG_00829
7184 SIDES/train/SIDES_00775
7184 CLAIMS/test/CLAIMS_00040
7184 PHONE/train/PHONE_00915
7184 BECOME/train/BECOME_00987
7184 DESCRIBED/train/DESCRIBED_00794
7184 LATEST/train/LATEST_00393
7184 EARLY/test/EARLY_00023
7184 BORDER/train/BORDER_00132
7184 ALLOWED/train/ALLOWED_00394
7184 SPEND/train/SPEND_00646
7184 SYRIA/test/SYRIA_00010
7184 COMPANY/train/COMPANY_00347
7184 STILL/train/STILL_00611
7184 WESTMINSTER/train/WESTMINSTER_00740
7184 INSIDE/train/INSIDE_00731
7184 MISSING/train/MISSING_00568
7184 HOURS/train/HOURS_00110
7184 RECORD/train/RECORD_00370
7184 SYSTEM/test/SYSTEM_00048
7184 THIRD/train/THIRD_00211
7184 ALMOST/train/ALMOST_00751
7184 NUMBER/train/NUMBER_00253
7184 GIVEN/train/GIVEN_00194
7184 RATES/train/RATES_00166
7184 MEDICAL/train/MEDICAL_00603
7184 INFORMATION/train/INFORMATION_00811
7184 EVENTS/train/EVENTS_00774
7184 GIVING/train/GIVING_00569
7184 FINAL/train/FINAL_00995
7184 PLACES/train/PLACES_00208
7184 LONGER/train/LONGER_00632
7184 ENGLAND/test/ENGLAND_00001
7184 BROUGHT/train/BROUGHT_00855
7184 GROUP/train/GROUP_00069
7184 WHILE/val/WHILE_00034
7184 ISLAMIC/train/ISLAMIC_00627
7184 THIRD/test/THIRD_00030
7184 STORY/train/STORY_00385
7184 ACTION/train/ACTION_00854
7184 NORTH/train/NORTH_00283
7184 ALMOST/test/ALMOST_00022
7184 HAPPENING/train/HAPPENING_00165
7184 BUILD/train/BUILD_00582
7184 DESCRIBED/train/DESCRIBED_00025
7184 HEALTH/train/HEALTH_00296
7184 ENGLAND/train/ENGLAND_00784
7184 PLANS/train/PLANS_00877
7184 ACCORDING/train/ACCORDING_00113
7184 SERVICE/val/SERVICE_00031
7184 VICTIMS/train/VICTIMS_00641
7184 FINANCIAL/train/FINANCIAL_00156
7184 BORDER/train/BORDER_00570
7184 CURRENT/train/CURRENT_00287
7184 GIVEN/train/GIVEN_00700
7184 DIFFERENCE/train/DIFFERENCE_00397
7184 FUTURE/val/FUTURE_00016
7184 REPORTS/train/REPORTS_00683
7184 LATEST/train/LATEST_00354
7184 MINISTERS/train/MINISTERS_00535
7184 AFRICA/train/AFRICA_00945
7184 ENERGY/train/ENERGY_00195
7184 WALES/test/WALES_00006
7184 CONCERNS/train/CONCERNS_00087
7184 WORKERS/train/WORKERS_00369
7184 AFFAIRS/test/AFFAIRS_00038
7184 TRIAL/train/TRIAL_00363
7184 ALREADY/train/ALREADY_00865
7184 SYSTEM/train/SYSTEM_00937
7184 SERVICES/test/SERVICES_00004
7184 LONGER/train/LONGER_00414
7184 FRONT/train/FRONT_00133
7184 SCHOOLS/train/SCHOOLS_00053
7184 REPORTS/val/REPORTS_00028
7184 INCREASE/test/INCREASE_00004
7184 RULES/train/RULES_00486
7184 BETTER/val/BETTER_00025
7184 MAKING/val/MAKING_00044
7184 MIGRANTS/train/MIGRANTS_00381
7184 ACCORDING/test/ACCORDING_00045
7184 VICTIMS/train/VICTIMS_00188
7184 MEMBER/val/MEMBER_00014
7184 BETTER/train/BETTER_00382
7184 EARLY/train/EARLY_00062
7184 CASES/train/CASES_00821
7184 FOOTBALL/train/FOOTBALL_00153
7184 PLACE/train/PLACE_00833
7184 PRESSURE/train/PRESSURE_00481
7184 WATER/train/WATER_00336
7184 NOTHING/test/NOTHING_00004
7184 WEATHER/train/WEATHER_00914
7184 OBAMA/train/OBAMA_00573
7184 PARENTS/train/PARENTS_00715
7184 PLACE/train/PLACE_00996
7184 WORST/train/WORST_00612
7184 AGAINST/test/AGAINST_00028
7184 EDUCATION/train/EDUCATION_00697
7184 FRENCH/train/FRENCH_00935
7184 DAVID/train/DAVID_00352
7184 HOMES/train/HOMES_00266
7184 GREECE/train/GREECE_00471
7184 COURT/test/COURT_00030
7184 SEVEN/train/SEVEN_00144
7184 UNDER/train/UNDER_00545
7184 MEMBER/train/MEMBER_00270
7184 COUPLE/train/COUPLE_00949
7184 RESPONSE/train/RESPONSE_00423
7184 OFFICERS/train/OFFICERS_00906
7184 GETTING/train/GETTING_00203
7184 FOUND/val/FOUND_00039
7184 PARLIAMENT/train/PARLIAMENT_00169
7184 CHIEF/train/CHIEF_00995
7184 CHILD/train/CHILD_00643
7184 IMPACT/train/IMPACT_00950
7184 MAKING/train/MAKING_00545
7184 FUTURE/val/FUTURE_00029
7184 WEEKEND/train/WEEKEND_00315
7184 GROWING/train/GROWING_00885
7184 MONTH/test/MONTH_00006
7184 AFRICA/train/AFRICA_00256
7184 INCREASE/test/INCREASE_00002
7184 NIGHT/test/NIGHT_00001
7184 BUDGET/train/BUDGET_00828
7184 BUDGET/train/BUDGET_00753
7184 AUTHORITIES/train/AUTHORITIES_00239
7184 TAKING/train/TAKING_00910
7184 INDUSTRY/train/INDUSTRY_00916
7184 CONCERNS/train/CONCERNS_00575
7184 CLAIMS/train/CLAIMS_00768
7184 AMOUNT/train/AMOUNT_00127
7184 IMMIGRATION/test/IMMIGRATION_00023
7184 MAJOR/train/MAJOR_00717
7184 OPERATION/train/OPERATION_00660
7184 CRIME/train/CRIME_00597
7184 SOMEONE/train/SOMEONE_00379
7184 CHALLENGE/train/CHALLENGE_00465
7184 HEALTH/train/HEALTH_00694
7184 SENSE/val/SENSE_00009
7184 OFFICIALS/train/OFFICIALS_00445
7184 THINGS/train/THINGS_00118
7184 LEADER/train/LEADER_00910
7184 MISSING/train/MISSING_00116
7184 MIGRANTS/test/MIGRANTS_00001
7184 DIFFERENCE/train/DIFFERENCE_00422
7184 ACCORDING/val/ACCORDING_00038
7184 ANNOUNCED/train/ANNOUNCED_00780
7184 UNION/train/UNION_00479
7184 RESULT/train/RESULT_00910
7184 EUROPEAN/train/EUROPEAN_00258
7184 LEADERS/train/LEADERS_00018
7184 GOVERNMENT/train/GOVERNMENT_00286
7184 EXPECTED/train/EXPECTED_00884
7184 DIFFERENCE/train/DIFFERENCE_00646
7184 GROWING/test/GROWING_00012
7184 AFRICA/train/AFRICA_00398
7184 BECOME/train/BECOME_00140
7184 SOCIAL/test/SOCIAL_00025
7184 THOUSANDS/train/THOUSANDS_00959
7184 DESCRIBED/train/DESCRIBED_00807
7184 GROUP/train/GROUP_00835
7184 ALLEGATIONS/test/ALLEGATIONS_00008
7184 BORDER/train/BORDER_00468
7184 CRIME/train/CRIME_00084
7184 CHILD/train/CHILD_00228
7184 ELECTION/train/ELECTION_00030
7184 POLICE/train/POLICE_00404
7184 BENEFITS/train/BENEFITS_00466
7184 DESCRIBED/train/DESCRIBED_00564
7184 EXTRA/train/EXTRA_00439
7184 GAMES/train/GAMES_00067
7184 AMERICAN/val/AMERICAN_00036
7184 WARNING/train/WARNING_00671
7184 DURING/val/DURING_00026
7184 MORNING/val/MORNING_00008
7184 IRELAND/train/IRELAND_00106
7184 WARNING/train/WARNING_00884
7184 UNDER/train/UNDER_00939
7184 FACING/train/FACING_00509
7184 KNOWN/val/KNOWN_00043
7184 FORMER/test/FORMER_00008
7184 LONGER/train/LONGER_00538
7184 ABOUT/train/ABOUT_00452
7184 BUDGET/train/BUDGET_00194
7184 PARTY/train/PARTY_00975
7184 SERIOUS/val/SERIOUS_00035
7184 CHINA/train/CHINA_00379
7184 DEBATE/train/DEBATE_00129
7184 INDEPENDENT/val/INDEPENDENT_00025
7184 WITHOUT/val/WITHOUT_00017
7184 BUDGET/train/BUDGET_00722
7184 SPENT/train/SPENT_00639
7184 CHILD/train/CHILD_00514
7184 HEALTH/train/HEALTH_00254
7184 NEVER/train/NEVER_00545
7184 SERIOUS/train/SERIOUS_00440
7184 WINDS/train/WINDS_00897
7184 BORDER/train/BORDER_00284
7184 RECORD/train/RECORD_00464
7184 CAMPAIGN/train/CAMPAIGN_00998
7184 BLACK/train/BLACK_00609
7184 CUSTOMERS/train/CUSTOMERS_00068
7184 MAJOR/train/MAJOR_00218
7184 ISLAMIC/train/ISLAMIC_00088
7184 CHINA/train/CHINA_00817
7184 PARLIAMENT/train/PARLIAMENT_00954
7184 LOCAL/train/LOCAL_00868
7184 MISSING/train/MISSING_00115
7184 LEGAL/test/LEGAL_00035
7184 OPERATION/test/OPERATION_00044
7184 REPORTS/train/REPORTS_00716
7184 MISSING/train/MISSING_00683
7184 STILL/train/STILL_00092
7184 STATES/train/STATES_00037
7184 PATIENTS/train/PATIENTS_00256
7184 SERVICE/train/SERVICE_00360
7184 ALLOW/train/ALLOW_00838
7184 SOCIETY/test/SOCIETY_00036
7184 THOUSANDS/val/THOUSANDS_00015
7184 GIVING/train/GIVING_00538
7184 SPEECH/train/SPEECH_00475
7184 DESCRIBED/train/DESCRIBED_00705
7184 ALREADY/train/ALREADY_00066
7184 ABUSE/train/ABUSE_00785
7184 EMERGENCY/train/EMERGENCY_00543
7184 ANNOUNCED/train/ANNOUNCED_00490
7184 MAKES/train/MAKES_00342
7184 UNDER/train/UNDER_00006
7184 AFTER/train/AFTER_00596
7184 TAKING/train/TAKING_00956
7184 WITHIN/val/WITHIN_00050
7184 PROCESS/train/PROCESS_00331
7184 CHANCE/test/CHANCE_00026
7184 BORDER/train/BORDER_00604
7184 OPERATION/train/OPERATION_00633
7184 MIGRANTS/train/MIGRANTS_00558
7184 NATIONAL/train/NATIONAL_00292
7184 HOMES/train/HOMES_00733
7184 ACCUSED/train/ACCUSED_00522
7184 AFRICA/train/AFRICA_00852
7184 SECTOR/test/SECTOR_00001
7184 AFFECTED/val/AFFECTED_00041
7184 UNDER/val/UNDER_00008
7184 THOSE/train/THOSE_00973
7184 AHEAD/train/AHEAD_00140
7184 WOULD/train/WOULD_00959
7184 PROBLEMS/train/PROBLEMS_00997
7184 OFFICERS/train/OFFICERS_00544
7184 BUDGET/train/BUDGET_00590
7184 LONDON/train/LONDON_00736
7184 TAKEN/train/TAKEN_00310
7184 SCHOOLS/train/SCHOOLS_00821
7184 BUSINESS/train/BUSINESS_00072
7184 CLOSE/train/CLOSE_00776
7184 DOING/train/DOING_00632
7184 SUPPORT/train/SUPPORT_00466
7184 FIRST/train/FIRST_00162
7184 RECORD/val/RECORD_00017
7184 WALES/train/WALES_00908
7184 SENSE/train/SENSE_00278
7184 CALLED/train/CALLED_00666
7184 MOMENT/train/MOMENT_00130
7184 ISLAMIC/train/ISLAMIC_00834
7184 WARNING/train/WARNING_00920
7184 BUSINESSES/train/BUSINESSES_00587
7184 HOMES/train/HOMES_00015
7184 POLITICAL/train/POLITICAL_00721
7184 ACCORDING/train/ACCORDING_00711
7184 HOSPITAL/train/HOSPITAL_00263
7184 EMERGENCY/train/EMERGENCY_00688
7184 AMERICA/train/AMERICA_00032
7184 INFORMATION/train/INFORMATION_00010
7184 SPENT/train/SPENT_00319
7184 ACCORDING/train/ACCORDING_00172
7184 DECIDED/train/DECIDED_00732
7184 HEAVY/train/HEAVY_00095
7184 REPORTS/train/REPORTS_00629
7184 LONDON/train/LONDON_00627
7184 ACCORDING/train/ACCORDING_00691
7184 ACCUSED/test/ACCUSED_00032
7184 GROUP/test/GROUP_00021
7184 SUPPORT/test/SUPPORT_00037
7184 MONEY/val/MONEY_00041
7184 BRITAIN/train/BRITAIN_00781
7184 ACCORDING/train/ACCORDING_00672
7184 WARNING/train/WARNING_00466
7184 BUDGET/train/BUDGET_00643
7184 EXTRA/train/EXTRA_00633
7184 SENIOR/val/SENIOR_00024
7184 MEANS/train/MEANS_00210
7184 CHILD/val/CHILD_00042
7184 LONGER/train/LONGER_00525
7184 FUTURE/train/FUTURE_00692
7184 OPERATION/train/OPERATION_00347
7184 RECENT/train/RECENT_00837
7184 RESPONSE/train/RESPONSE_00837
7184 STATE/train/STATE_00695
7184 HEALTH/train/HEALTH_00762
7184 BETWEEN/train/BETWEEN_00037
7184 BECAUSE/train/BECAUSE_00773
7184 PRISON/test/PRISON_00024
7184 OTHERS/train/OTHERS_00809
7184 IMPACT/val/IMPACT_00036
7184 HEARD/val/HEARD_00015
7184 PRESSURE/train/PRESSURE_00583
7184 ALLOW/train/ALLOW_00761
7184 MEDIA/train/MEDIA_00316
7184 HOURS/train/HOURS_00432
7184 SUPPORT/train/SUPPORT_00475
7184 DECIDED/train/DECIDED_00659
7184 PROVIDE/train/PROVIDE_00450
7184 TRUST/train/TRUST_00037
7184 ABUSE/train/ABUSE_00221
7184 FIRST/test/FIRST_00015
7184 AMONG/train/AMONG_00176
7184 CHILDREN/train/CHILDREN_00147
7184 YOUNG/train/YOUNG_00540
7184 YESTERDAY/test/YESTERDAY_00023
7184 MILITARY/train/MILITARY_00350
7184 GLOBAL/test/GLOBAL_00050
7184 DOING/train/DOING_00808
7184 GROWING/train/GROWING_00879
7184 SCOTTISH/train/SCOTTISH_00989
7184 STAFF/train/STAFF_00329
7184 LABOUR/val/LABOUR_00006
7184 YESTERDAY/train/YESTERDAY_00029
7184 AMONG/train/AMONG_00455
7184 PERSONAL/train/PERSONAL_00073
7184 EVIDENCE/train/EVIDENCE_00318
7184 OTHERS/train/OTHERS_00859
7184 FOOTBALL/train/FOOTBALL_00751
7184 MISSING/train/MISSING_00761
7184 LONGER/train/LONGER_00736
7184 ATTACK/train/ATTACK_00656
7184 PERSON/train/PERSON_00659
7184 HOUSE/train/HOUSE_00374
7184 ELECTION/train/ELECTION_00127
7184 PLANS/train/PLANS_00602
7184 STILL/test/STILL_00021
7184 MISSING/val/MISSING_00037
7184 FINAL/train/FINAL_00586
7184 AFFAIRS/val/AFFAIRS_00016
7184 PATIENTS/train/PATIENTS_00957
7184 DOING/train/DOING_00470
7184 HOSPITAL/train/HOSPITAL_00643
7184 MIDDLE/val/MIDDLE_00038
7184 POTENTIAL/val/POTENTIAL_00022
7184 PROBABLY/test/PROBABLY_00031
7184 JAMES/train/JAMES_00625
7184 AFFAIRS/train/AFFAIRS_00660
7184 CHANGES/train/CHANGES_00292
7184 PRESIDENT/train/PRESIDENT_00202
7184 INCREASE/train/INCREASE_00098
7184 MEDICAL/train/MEDICAL_00588
7184 LATER/train/LATER_00518
7184 MILLION/val/MILLION_00015
7184 MEASURES/train/MEASURES_00837
7184 DECISION/train/DECISION_00299
7184 OFFICERS/train/OFFICERS_00747
7184 CUSTOMERS/train/CUSTOMERS_00071
7184 CANCER/train/CANCER_00598
7184 STATES/train/STATES_00268
7184 BEHIND/train/BEHIND_00244
7184 RECORD/val/RECORD_00024
7184 INDEPENDENT/train/INDEPENDENT_00199
7184 SYRIAN/test/SYRIAN_00001
7184 FACING/train/FACING_00309
7184 TAKING/train/TAKING_00042
7184 UNDER/val/UNDER_00013
7184 LOCAL/test/LOCAL_00013
7184 SECOND/train/SECOND_00172
7184 SCHOOL/train/SCHOOL_00594
7184 GOVERNMENT/train/GOVERNMENT_00098
7184 FORMER/train/FORMER_00635
7184 CHIEF/train/CHIEF_00391
7184 MILLION/test/MILLION_00027
7184 THOUGHT/train/THOUGHT_00134
7184 GIVEN/train/GIVEN_00020
7184 AMERICAN/train/AMERICAN_00077
7184 ATTACK/train/ATTACK_00428
7184 NIGHT/train/NIGHT_00194
7184 REPORT/train/REPORT_00367
7184 SERIES/train/SERIES_00042
7184 LIVING/train/LIVING_00485
7184 IMPORTANT/val/IMPORTANT_00044
7184 MURDER/train/MURDER_00382
7184 DEATH/train/DEATH_00018
7184 NORTHERN/train/NORTHERN_00228
7184 MISSING/val/MISSING_00030
7184 WORKERS/train/WORKERS_00776
7184 LEVELS/train/LEVELS_00156
7184 BUILDING/train/BUILDING_00064
7184 INVOLVED/train/INVOLVED_00738
7184 UNION/train/UNION_00104
7184 ENERGY/train/ENERGY_00853
7184 LATEST/train/LATEST_00589
7184 OFFICE/train/OFFICE_00838
7184 FIRST/train/FIRST_00444
7184 INFORMATION/test/INFORMATION_00042
7184 OBAMA/val/OBAMA_00013
7184 LABOUR/train/LABOUR_00535
7184 EDITOR/train/EDITOR_00509
7184 SHORT/test/SHORT_00044
7184 PLANS/train/PLANS_00667
7184 TIMES/train/TIMES_00032
7184 HOMES/train/HOMES_00117
7184 WHETHER/train/WHETHER_00416
7184 MIGHT/train/MIGHT_00621
7184 PERHAPS/train/PERHAPS_00244
7184 GAMES/train/GAMES_00872
7184 RULES/train/RULES_00261
7184 SENIOR/train/SENIOR_00377
7184 PARENTS/train/PARENTS_00672
7184 LOCAL/train/LOCAL_00290
7184 RIGHTS/train/RIGHTS_00790
7184 RIGHTS/train/RIGHTS_00946
7184 LEADERSHIP/train/LEADERSHIP_00060
7184 STORY/train/STORY_00782
7184 HISTORY/train/HISTORY_00189
7184 MEANS/train/MEANS_00708
7184 CONFERENCE/train/CONFERENCE_00460
7184 DESCRIBED/val/DESCRIBED_00044
7184 ANOTHER/train/ANOTHER_00453
7184 OBAMA/train/OBAMA_00339
7184 DETAILS/train/DETAILS_00282
7184 SEVEN/train/SEVEN_00130
7184 HOMES/train/HOMES_00933
7184 BENEFIT/train/BENEFIT_00469
7184 RECENT/val/RECENT_00010
7184 FRONT/test/FRONT_00034
7184 GROUND/train/GROUND_00245
7184 BIGGEST/train/BIGGEST_00411
7184 STATES/train/STATES_00073
7184 DIFFICULT/train/DIFFICULT_00210
7184 ANNOUNCED/train/ANNOUNCED_00617
7184 LATER/train/LATER_00302
7184 LONDON/train/LONDON_00410
7184 AFTER/train/AFTER_00547
7184 DECIDED/test/DECIDED_00038
7184 HUNDREDS/train/HUNDREDS_00001
7184 TAKING/train/TAKING_00491
7184 COUNTRIES/val/COUNTRIES_00016
7184 GUILTY/train/GUILTY_00667
7184 SENIOR/train/SENIOR_00072
7184 LEADERS/train/LEADERS_00601
7184 GAMES/train/GAMES_00766
7184 HAPPENING/test/HAPPENING_00046
7184 CAPITAL/val/CAPITAL_00025
7184 MORNING/val/MORNING_00044
7184 ENGLAND/train/ENGLAND_00267
7184 SCOTTISH/train/SCOTTISH_00064
7184 SECRETARY/train/SECRETARY_00196
7184 CRISIS/test/CRISIS_00019
7184 PUBLIC/train/PUBLIC_00245
7184 FRENCH/val/FRENCH_00030
7184 TONIGHT/train/TONIGHT_00604
7184 BRITISH/train/BRITISH_00459
7184 CRIME/test/CRIME_00044
7184 FIRST/test/FIRST_00036
7184 ALREADY/train/ALREADY_00220
7184 DETAILS/val/DETAILS_00024
7184 WEEKEND/train/WEEKEND_00532
7184 PERSONAL/test/PERSONAL_00028
7184 REPORT/train/REPORT_00422
7184 INFORMATION/train/INFORMATION_00451
7184 IMPACT/train/IMPACT_00849
7184 NUMBERS/train/NUMBERS_00757
7184 MINISTER/train/MINISTER_00886
7184 COMPANIES/train/COMPANIES_00187
7184 STREET/test/STREET_00022
7184 CLAIMS/train/CLAIMS_00206
7184 WORKERS/val/WORKERS_00014
7184 ISSUE/train/ISSUE_00579
7184 FIGHT/train/FIGHT_00534
7184 MIGRANTS/train/MIGRANTS_00189
7184 ATTACK/train/ATTACK_00579
7184 MONTH/train/MONTH_00065
7184 INFORMATION/train/INFORMATION_00743
7184 WANTS/train/WANTS_00180
7184 WESTMINSTER/train/WESTMINSTER_00273
7184 LEVELS/train/LEVELS_00148
7184 GROUND/train/GROUND_00262
7184 SERIES/train/SERIES_00360
7184 IMPORTANT/train/IMPORTANT_00430
7184 LONDON/train/LONDON_00690
7184 THEIR/test/THEIR_00049
7184 POWER/train/POWER_00033
7184 PARLIAMENT/train/PARLIAMENT_00235
7184 MORNING/train/MORNING_00698
7184 CURRENT/train/CURRENT_00698
7184 OBAMA/train/OBAMA_00431
7184 HOUSING/test/HOUSING_00012
7184 BRITISH/train/BRITISH_00159
7184 CHANCE/train/CHANCE_00298
7184 SOCIAL/test/SOCIAL_00004
7184 WALES/train/WALES_00778
7184 NATIONAL/train/NATIONAL_00039
7184 THOUSANDS/val/THOUSANDS_00033
7184 PRIVATE/train/PRIVATE_00395
7184 CHIEF/train/CHIEF_00163
7184 WALES/train/WALES_00993
7184 MINISTER/train/MINISTER_00907
7184 OFFICE/train/OFFICE_00149
7184 FOOTBALL/train/FOOTBALL_00449
7184 ALMOST/train/ALMOST_00528
7184 SCHOOLS/train/SCHOOLS_00980
7184 MINISTERS/train/MINISTERS_00163
7184 AMOUNT/train/AMOUNT_00244
7184 WATCHING/val/WATCHING_00040
7184 ABUSE/val/ABUSE_00014
7184 BUDGET/train/BUDGET_00627
7184 OPERATION/train/OPERATION_00640
7184 ASKING/train/ASKING_00700
7184 SECURITY/train/SECURITY_00065
7184 MANCHESTER/train/MANCHESTER_00097
7184 UNTIL/train/UNTIL_00914
7184 AFRICA/train/AFRICA_00638
7184 GEORGE/train/GEORGE_00582
7184 AFFAIRS/train/AFFAIRS_00499
7184 SERVICES/test/SERVICES_00012
7184 MOVING/train/MOVING_00390
7184 PRISON/train/PRISON_00674
7184 GREECE/test/GREECE_00042
7184 AFRICA/train/AFRICA_00501
7184 AFFECTED/train/AFFECTED_00734
7184 MESSAGE/train/MESSAGE_00495
7184 HOMES/train/HOMES_00802
7184 CUSTOMERS/train/CUSTOMERS_00767
7184 ACCESS/train/ACCESS_00110
7184 TALKS/train/TALKS_00189
7184 WITHOUT/train/WITHOUT_00412
7184 VICTIMS/train/VICTIMS_00454
7184 YESTERDAY/train/YESTERDAY_00563
7184 GIVING/test/GIVING_00008
7184 FACING/train/FACING_00063
7184 PLANS/train/PLANS_00607
7184 INQUIRY/train/INQUIRY_00306
7184 TODAY/train/TODAY_00494
7184 CLOSE/train/CLOSE_00932
7184 EARLY/train/EARLY_00336
7184 TAKING/train/TAKING_00941
7184 DETAILS/train/DETAILS_00478
7184 LIKELY/train/LIKELY_00198
7184 WATCHING/train/WATCHING_00038
7184 INFLATION/val/INFLATION_00042
7184 WORKERS/train/WORKERS_00905
7184 MILLIONS/val/MILLIONS_00010
7184 ITSELF/train/ITSELF_00686
7184 ALLEGATIONS/val/ALLEGATIONS_00010
7184 MEDIA/train/MEDIA_00737
7184 VICTIMS/train/VICTIMS_00816
7184 RETURN/train/RETURN_00010
7184 NIGHT/train/NIGHT_00328
7184 SPENT/val/SPENT_00048
7184 THREAT/train/THREAT_00765
7184 OPERATION/train/OPERATION_00525
7184 ACCORDING/train/ACCORDING_00898
7184 WARNING/train/WARNING_00897
7184 PARTIES/train/PARTIES_00820
7184 COMES/train/COMES_00884
7184 ANOTHER/test/ANOTHER_00006
7184 LITTLE/train/LITTLE_00918
7184 INQUIRY/train/INQUIRY_00883
7184 LATER/train/LATER_00607
7184 DETAILS/train/DETAILS_00926
7184 BIGGEST/train/BIGGEST_00173
7184 MINUTES/train/MINUTES_00258
7184 OBAMA/train/OBAMA_00586
7184 LOCAL/train/LOCAL_00649
7184 ANNOUNCED/val/ANNOUNCED_00044
7184 REPORTS/test/REPORTS_00002
7184 HEALTH/train/HEALTH_00372
7184 SOUTH/val/SOUTH_00044
7184 SHOULD/train/SHOULD_00443
7184 DEGREES/train/DEGREES_00256
7184 SAYING/train/SAYING_00018
7184 MEASURES/train/MEASURES_00942
7184 SCHOOLS/val/SCHOOLS_00015
7184 BILLION/train/BILLION_00498
7184 FOREIGN/test/FOREIGN_00038
7184 GUILTY/train/GUILTY_00610
7184 STARTED/train/STARTED_00675
7184 ABUSE/train/ABUSE_00217
7184 FINAL/val/FINAL_00018
7184 NATIONAL/train/NATIONAL_00973
7184 WINDS/train/WINDS_00744
7184 FRONT/train/FRONT_00975
7184 INCREASE/test/INCREASE_00015
7184 KNOWN/train/KNOWN_00659
7184 LATEST/train/LATEST_00619
7184 MILLIONS/val/MILLIONS_00013
7184 CENTRAL/test/CENTRAL_00003
7184 SERIES/test/SERIES_00024
7184 STORY/train/STORY_00336
7184 CUSTOMERS/test/CUSTOMERS_00037
7184 PROVIDE/test/PROVIDE_00009
7184 STRONG/train/STRONG_00775
7184 WESTMINSTER/train/WESTMINSTER_00238
7184 DESCRIBED/train/DESCRIBED_00427
7184 STATEMENT/train/STATEMENT_00866
7184 EARLY/train/EARLY_00952
7184 COMPANY/train/COMPANY_00784
7184 GEORGE/train/GEORGE_00488
7184 LEAVE/train/LEAVE_00929
7184 LIVING/train/LIVING_00974
7184 TONIGHT/train/TONIGHT_00091
7184 EVERY/train/EVERY_00823
7184 HUMAN/train/HUMAN_00846
7184 COUPLE/train/COUPLE_00197
7184 NORTHERN/train/NORTHERN_00851
7184 MEDICAL/train/MEDICAL_00261
7184 HEALTH/train/HEALTH_00034
7184 CRISIS/train/CRISIS_00151
7184 CALLED/train/CALLED_00391
7184 MANCHESTER/train/MANCHESTER_00108
7184 LATER/train/LATER_00474
7184 MIGRANTS/train/MIGRANTS_00215
7184 FIGHTING/train/FIGHTING_00264
7184 CHIEF/val/CHIEF_00014
7184 RECORD/train/RECORD_00734
7184 SHORT/test/SHORT_00029
7184 AHEAD/train/AHEAD_00841
7184 ACCORDING/train/ACCORDING_00028
7184 ECONOMIC/val/ECONOMIC_00012
7184 GUILTY/train/GUILTY_00284
7184 INQUIRY/train/INQUIRY_00775
7184 AMERICAN/val/AMERICAN_00043
7184 MISSING/val/MISSING_00026
7184 RUSSIA/train/RUSSIA_00468
7184 CHALLENGE/train/CHALLENGE_00020
7184 AFTER/train/AFTER_00887
7184 THOUGHT/train/THOUGHT_00467
7184 CLOUD/train/CLOUD_00561
7184 LEAVE/train/LEAVE_00792
7184 OUTSIDE/train/OUTSIDE_00115
7184 FORMER/train/FORMER_00847
7184 PARTY/val/PARTY_00049
7184 BENEFITS/test/BENEFITS_00027
7184 ACTION/train/ACTION_00466
7184 ABUSE/train/ABUSE_00966
7184 COMING/val/COMING_00023
7184 CHARGE/train/CHARGE_00726
7184 NUMBERS/train/NUMBERS_00712
7184 WORKERS/train/WORKERS_00865
7184 LITTLE/train/LITTLE_00056
7184 EXPECTED/train/EXPECTED_00968
7184 WITHOUT/train/WITHOUT_00280
7184 ATTACK/train/ATTACK_00954
7184 ENOUGH/train/ENOUGH_00692
7184 OPERATION/train/OPERATION_00277
7184 NEEDS/train/NEEDS_00177
7184 MEDICAL/val/MEDICAL_00012
7184 GROWING/train/GROWING_00497
7184 SPECIAL/train/SPECIAL_00113
7184 AREAS/test/AREAS_00039
7184 CANCER/train/CANCER_00381
7184 MILLIONS/train/MILLIONS_00001
7184 AMOUNT/train/AMOUNT_00011
7184 ITSELF/train/ITSELF_00269
7184 CHIEF/train/CHIEF_00972
7184 ACCORDING/train/ACCORDING_00823
7184 EVIDENCE/val/EVIDENCE_00012
7184 LATEST/train/LATEST_00988
7184 PRIVATE/train/PRIVATE_00761
7184 ACCUSED/train/ACCUSED_00773
7184 EDUCATION/val/EDUCATION_00034
7184 HOMES/train/HOMES_00552
7184 RIGHTS/train/RIGHTS_00393
7184 GAMES/test/GAMES_00049
7184 ARRESTED/train/ARRESTED_00069
7184 LATEST/train/LATEST_00200
7184 POLITICIANS/train/POLITICIANS_00993
7184 STREET/train/STREET_00527
7184 TAKEN/train/TAKEN_00186
7184 LOCAL/train/LOCAL_00663
7184 SOCIETY/train/SOCIETY_00784
7184 USING/val/USING_00037
7184 WARNING/train/WARNING_00529
7184 ENGLAND/train/ENGLAND_00302
7184 POLICE/train/POLICE_00791
7184 AFRICA/train/AFRICA_00307
7184 LEAST/train/LEAST_00057
7184 WORKING/train/WORKING_00417
7184 MINISTER/train/MINISTER_00230
7184 AMERICAN/train/AMERICAN_00269
7184 AFFAIRS/val/AFFAIRS_00004
7184 TERMS/train/TERMS_00676
7184 NATIONAL/train/NATIONAL_00267
7184 ATTACKS/train/ATTACKS_00410
7184 MIGRANTS/train/MIGRANTS_00842
7184 EVERYONE/test/EVERYONE_00043
7184 GREECE/train/GREECE_00277
7184 SENSE/train/SENSE_00186
7184 WALES/train/WALES_00641
7184 SCHOOLS/val/SCHOOLS_00036
7184 REPORT/train/REPORT_00351
7184 FOLLOWING/val/FOLLOWING_00025
7184 WARNING/train/WARNING_00658
7184 REPORT/train/REPORT_00611
7184 SECURITY/train/SECURITY_00287
7184 BILLION/train/BILLION_00416
7184 AGREEMENT/train/AGREEMENT_00817
7184 OPERATION/test/OPERATION_00033
7184 GROUP/train/GROUP_00200
7184 INFORMATION/train/INFORMATION_00229
7184 ISLAMIC/train/ISLAMIC_00448
7184 MISSING/train/MISSING_00100
7184 TOMORROW/train/TOMORROW_00121
7184 TODAY/train/TODAY_00551
7184 AFRICA/train/AFRICA_00180
7184 OFFICERS/train/OFFICERS_00705
7184 PROTECT/train/PROTECT_00871
7184 LATEST/train/LATEST_00265
7184 SCHOOL/test/SCHOOL_00041
7184 FIGURES/train/FIGURES_00248
7184 WAITING/train/WAITING_00078
7184 PLACE/train/PLACE_00648
7184 NORTHERN/train/NORTHERN_00665
7184 SPENDING/train/SPENDING_00459
7184 ABUSE/train/ABUSE_00138
7184 ATTACK/train/ATTACK_00205
7184 GAMES/train/GAMES_00241
7184 GIVING/train/GIVING_00756
7184 DESCRIBED/train/DESCRIBED_00821
7184 MILLION/train/MILLION_00057
7184 RESPONSE/test/RESPONSE_00008
7184 GLOBAL/test/GLOBAL_00048
7184 PRICES/train/PRICES_00649
7184 SINGLE/val/SINGLE_00021
7184 THOUSANDS/train/THOUSANDS_00757
7184 FIGHT/train/FIGHT_00247
7184 DEGREES/train/DEGREES_00859
7184 FUTURE/train/FUTURE_00230
7184 LEVEL/train/LEVEL_00542
7184 PRICE/train/PRICE_00589
7184 VICTIMS/val/VICTIMS_00028
7184 BRITISH/val/BRITISH_00028
7184 ABUSE/val/ABUSE_00012
7184 OTHER/train/OTHER_00889
7184 PLANS/train/PLANS_00255
7184 AFRICA/train/AFRICA_00533
7184 ALMOST/train/ALMOST_00467
7184 PERSON/train/PERSON_00176
7184 FOUND/train/FOUND_00742
7184 SCHOOL/val/SCHOOL_00039
7184 FIGURES/train/FIGURES_00715
7184 IMMIGRATION/train/IMMIGRATION_00319
7184 CLAIMS/train/CLAIMS_00465
7184 FORCE/test/FORCE_00016
7184 WHICH/train/WHICH_00216
7184 WEAPONS/train/WEAPONS_00313
7184 MEMBERS/train/MEMBERS_00054
7184 SPEAKING/train/SPEAKING_00849
7184 FRONT/train/FRONT_00288
7184 COMMUNITY/train/COMMUNITY_00606
7184 HEALTH/train/HEALTH_00773
7184 POINT/train/POINT_00019
7184 PLANS/train/PLANS_00415
7184 PATIENTS/train/PATIENTS_00161
7184 HOURS/train/HOURS_00174
7184 HOMES/train/HOMES_00323
7184 RATES/train/RATES_00399
7184 STILL/train/STILL_00835
7184 THERE/train/THERE_00793
7184 GOVERNMENT/train/GOVERNMENT_00038
7184 MURDER/train/MURDER_00569
7184 AMONG/train/AMONG_00733
7184 THOUSANDS/train/THOUSANDS_00766
7184 MURDER/val/MURDER_00022
7184 OFFICERS/train/OFFICERS_00941
7184 BLACK/train/BLACK_00016
7184 POLITICAL/train/POLITICAL_00817
7184 DESPITE/train/DESPITE_00146
7184 RECENT/train/RECENT_00647
7184 FAMILY/train/FAMILY_00568
7184 DEATH/train/DEATH_00292
7184 SENIOR/test/SENIOR_00040
7184 SERIOUS/train/SERIOUS_00475
7184 MISSING/train/MISSING_00507
7184 ABUSE/train/ABUSE_00733
7184 FRIDAY/train/FRIDAY_00548
7184 ENGLAND/train/ENGLAND_00010
7184 EXPECTED/train/EXPECTED_00599
7184 MOMENT/train/MOMENT_00083
7184 REPORTS/val/REPORTS_00044
7184 BEFORE/train/BEFORE_00241
7184 INFORMATION/val/INFORMATION_00026
7184 STORY/train/STORY_00422
7184 ALLOW/train/ALLOW_00453
7184 PLACE/train/PLACE_00487
7184 WORKERS/test/WORKERS_00039
7184 POLITICAL/test/POLITICAL_00029
7184 POINT/train/POINT_00003
7184 WORDS/train/WORDS_00254
7184 DESCRIBED/train/DESCRIBED_00656
7184 PRIVATE/train/PRIVATE_00957
7184 ABUSE/train/ABUSE_00115
7184 LEADER/val/LEADER_00045
7184 MONTH/train/MONTH_00618
7184 STAGE/train/STAGE_00828
7184 THEMSELVES/test/THEMSELVES_00031
7184 CANCER/train/CANCER_00785
7184 PRISON/train/PRISON_00837
7184 ACCORDING/val/ACCORDING_00004
7184 GROWING/train/GROWING_00148
7184 THIRD/train/THIRD_00606
7184 ISLAMIC/train/ISLAMIC_00144
7184 SPECIAL/test/SPECIAL_00021
7184 ENERGY/train/ENERGY_00487
7184 PROTECT/train/PROTECT_00064
7184 ANNOUNCED/train/ANNOUNCED_00607
7184 OBAMA/train/OBAMA_00289
7184 CAMPAIGN/test/CAMPAIGN_00035
7184 OFFICIALS/train/OFFICIALS_00902
7184 HEALTH/val/HEALTH_00009
7184 STARTED/train/STARTED_00728
7184 JUSTICE/val/JUSTICE_00006
7184 STORY/train/STORY_00416
7184 STORY/train/STORY_00805
7184 LATEST/train/LATEST_00831
7184 SCOTTISH/train/SCOTTISH_00457
7184 WESTERN/train/WESTERN_00464
7184 NIGHT/train/NIGHT_00716
7184 OFFICERS/train/OFFICERS_00371
7184 COUNCIL/train/COUNCIL_00958
7184 DETAILS/train/DETAILS_00342
7184 SERIES/train/SERIES_00207
7184 YESTERDAY/train/YESTERDAY_00624
7184 OPERATION/train/OPERATION_00447
7184 TALKS/train/TALKS_00142
7184 STORY/test/STORY_00025
7184 ANNOUNCED/test/ANNOUNCED_00021
7184 COULD/train/COULD_00825
7184 STRONG/train/STRONG_00235
7184 EDUCATION/val/EDUCATION_00048
7184 YOUNG/train/YOUNG_00315
7184 DEBATE/test/DEBATE_00040
7184 KILLED/train/KILLED_00463
7184 PLACES/train/PLACES_00033
7184 CANCER/train/CANCER_00418
7184 DIFFICULT/train/DIFFICULT_00178
7184 COULD/train/COULD_00665
7184 WARNING/train/WARNING_00956
7184 CONTROL/train/CONTROL_00839
7184 DESPITE/train/DESPITE_00935
7184 MARKET/train/MARKET_00572
7184 POSSIBLE/train/POSSIBLE_00271
7184 SPECIAL/train/SPECIAL_00865
7184 PRISON/val/PRISON_00050
7184 DESCRIBED/train/DESCRIBED_00390
7184 MEMBER/train/MEMBER_00073
7184 STARTED/train/STARTED_00427
7184 CASES/train/CASES_00001
7184 INDEPENDENT/train/INDEPENDENT_00949
7184 EASTERN/train/EASTERN_00115
7184 OBAMA/test/OBAMA_00046
7184 CUSTOMERS/train/CUSTOMERS_00635
7184 UNDER/train/UNDER_00174
7184 INFORMATION/train/INFORMATION_00102
7184 ATTACKS/train/ATTACKS_00826
7184 BENEFITS/train/BENEFITS_00684
7184 BUSINESSES/train/BUSINESSES_00239
7184 REPORT/train/REPORT_00496
7184 LOCAL/test/LOCAL_00029
7184 OTHERS/train/OTHERS_00592
7184 PRIVATE/train/PRIVATE_00891
7184 LIVES/train/LIVES_00874
7184 TALKS/train/TALKS_00908
7184 TIMES/val/TIMES_00033
7184 WESTMINSTER/train/WESTMINSTER_00699
7184 COULD/train/COULD_00149
7184 UNDER/train/UNDER_00589
7184 PEOPLE/train/PEOPLE_00824
7184 YOUNG/val/YOUNG_00016
7184 MINISTER/test/MINISTER_00004
7184 GROWING/train/GROWING_00059
7184 ACROSS/train/ACROSS_00178
7184 SOCIAL/train/SOCIAL_00893
7184 PLANS/train/PLANS_00235
7184 STORY/train/STORY_00327
7184 FOLLOWING/train/FOLLOWING_00218
7184 OBAMA/train/OBAMA_00667
7184 AMERICAN/train/AMERICAN_00234
7184 LATEST/train/LATEST_00495
7184 WORST/test/WORST_00008
7184 EUROPEAN/test/EUROPEAN_00025
7184 FOLLOWING/train/FOLLOWING_00350
7184 LIVING/train/LIVING_00770
7184 TOMORROW/val/TOMORROW_00005
7184 LATEST/train/LATEST_00990
7184 UNION/train/UNION_00928
7184 GIVEN/train/GIVEN_00682
7184 FACING/train/FACING_00953
7184 CALLED/test/CALLED_00032
7184 POWERS/train/POWERS_00165
7184 MONTHS/train/MONTHS_00295
7184 COULD/train/COULD_00171
7184 REPORTS/train/REPORTS_00975
7184 GETTING/val/GETTING_00033
7184 NUMBER/train/NUMBER_00044
7184 SOCIAL/train/SOCIAL_00231
7184 FORMER/val/FORMER_00045
7184 WOMEN/train/WOMEN_00884
7184 HOUSE/test/HOUSE_00028
7184 AMERICA/train/AMERICA_00749
7184 MINISTERS/train/MINISTERS_00329
7184 SCHOOLS/train/SCHOOLS_00288
7184 MINISTERS/train/MINISTERS_00638
7184 SITUATION/train/SITUATION_00381
7184 BEFORE/val/BEFORE_00011
7184 LARGE/val/LARGE_00042
7184 FOOTBALL/val/FOOTBALL_00009
7184 THOSE/train/THOSE_00743
7184 COMMUNITY/train/COMMUNITY_00010
7184 FIGURES/train/FIGURES_00982
7184 CRISIS/train/CRISIS_00579
7184 AFTER/train/AFTER_00239
7184 STORY/train/STORY_00185
7184 EXPECTED/val/EXPECTED_00020
7184 PRESIDENT/val/PRESIDENT_00017
7184 EARLY/test/EARLY_00018
7184 THIRD/train/THIRD_00888
7184 WHILE/train/WHILE_00561
7184 PLACE/val/PLACE_00030
7184 PRIME/train/PRIME_00053
7184 PROTECT/train/PROTECT_00383
7184 MIDDLE/train/MIDDLE_00108
7184 LABOUR/val/LABOUR_00039
7184 CAPITAL/train/CAPITAL_00665
7184 INDUSTRY/train/INDUSTRY_00990
7184 LEADERS/train/LEADERS_00280
7184 WARNING/train/WARNING_00698
7184 SEVERAL/train/SEVERAL_00239
7184 DESCRIBED/train/DESCRIBED_00472
7184 USING/train/USING_00554
7184 CHILDREN/train/CHILDREN_00931
7184 HOMES/train/HOMES_00858
7184 AMOUNT/train/AMOUNT_00801
7184 HOURS/train/HOURS_00628
7184 SUNDAY/val/SUNDAY_00044
7184 STORY/train/STORY_00762
7184 DIFFERENCE/train/DIFFERENCE_00358
7184 SHORT/val/SHORT_00005
7184 GROUP/train/GROUP_00573
7184 YESTERDAY/train/YESTERDAY_00708
7184 PATIENTS/train/PATIENTS_00680
7184 THEIR/train/THEIR_00251
7184 SERVICE/train/SERVICE_00117
7184 PLANS/train/PLANS_00654
7184 BLACK/train/BLACK_00149
7184 FOREIGN/test/FOREIGN_00024
7184 SCHOOLS/val/SCHOOLS_00003
7184 ACCORDING/test/ACCORDING_00016
7184 FACING/train/FACING_00733
7184 SINCE/train/SINCE_00043
7184 SINCE/train/SINCE_00617
7184 WESTMINSTER/train/WESTMINSTER_00496
7184 VIOLENCE/train/VIOLENCE_00018
7184 WARNING/train/WARNING_00019
7184 WARNING/train/WARNING_00813
7184 STAGE/train/STAGE_00177
7184 UNITED/test/UNITED_00008
7184 SPENT/train/SPENT_00586
7184 SUPPORT/train/SUPPORT_00281
7184 BORDER/test/BORDER_00031
7184 AMERICA/val/AMERICA_00005
7184 AFFAIRS/train/AFFAIRS_00054
7184 GEORGE/train/GEORGE_00946
7184 EUROPE/test/EUROPE_00042
7184 PAYING/val/PAYING_00024
7184 PARENTS/train/PARENTS_00775
7184 IRELAND/test/IRELAND_00019
7184 EMERGENCY/train/EMERGENCY_00722
7184 LIKELY/train/LIKELY_00281
7184 MEETING/train/MEETING_00647
7184 YEARS/train/YEARS_00727
7184 AFTER/val/AFTER_00030
7184 PAYING/train/PAYING_00514
7184 CHILD/train/CHILD_00455
7184 JUSTICE/train/JUSTICE_00268
7184 BRING/train/BRING_00200
7184 KILLED/train/KILLED_00876
7184 MONTH/train/MONTH_00405
7184 COUNTRY/val/COUNTRY_00009
7184 AGREEMENT/train/AGREEMENT_00696
7184 TOGETHER/val/TOGETHER_00013
7184 MISSING/train/MISSING_00475
7184 RESPONSE/train/RESPONSE_00679
7184 PRIME/train/PRIME_00375
7184 YOUNG/train/YOUNG_00427
7184 THIRD/train/THIRD_00562
7184 CALLED/val/CALLED_00037
7184 FORWARD/test/FORWARD_00007
7184 WEATHER/train/WEATHER_00851
7184 BECOME/val/BECOME_00021
7184 WAITING/train/WAITING_00572
7184 MEDIA/train/MEDIA_00656
7184 WESTMINSTER/train/WESTMINSTER_00332
7184 AFTER/train/AFTER_00377
7184 OFFICE/train/OFFICE_00083
7184 MEDICAL/train/MEDICAL_00638
7184 POLITICIANS/train/POLITICIANS_00966
7184 STRONG/train/STRONG_00506
7184 TOMORROW/val/TOMORROW_00029
7184 CALLED/train/CALLED_00615
7184 FRONT/train/FRONT_00557
7184 ACCORDING/train/ACCORDING_00020
7184 AFRICA/train/AFRICA_00928
7184 HUMAN/val/HUMAN_00005
7184 CAPITAL/train/CAPITAL_00580
7184 POWER/train/POWER_00680
7184 UNTIL/train/UNTIL_00505
7184 JAMES/train/JAMES_00689
7184 MINUTES/test/MINUTES_00026
7184 PLANS/val/PLANS_00008
7184 YEARS/train/YEARS_00943
7184 MEDIA/train/MEDIA_00268
7184 AFFECTED/train/AFFECTED_00214
7184 AGREE/val/AGREE_00042
7184 PRISON/val/PRISON_00040
7184 AFTER/val/AFTER_00037
7184 IRELAND/train/IRELAND_00445
7184 TODAY/train/TODAY_00327
7184 OUTSIDE/train/OUTSIDE_00171
7184 MINUTES/train/MINUTES_00882
7184 EXPECTED/train/EXPECTED_00176
7184 PUBLIC/train/PUBLIC_00781
7184 LEVELS/train/LEVELS_00896
7184 CRISIS/train/CRISIS_00888
7184 AMONG/val/AMONG_00040
7184 START/train/START_00733
7184 GREECE/train/GREECE_00013
7184 CLAIMS/test/CLAIMS_00012
7184 CAMPAIGN/train/CAMPAIGN_00964
7184 OTHERS/train/OTHERS_00997
7184 OTHERS/train/OTHERS_00727
7184 EUROPE/val/EUROPE_00010
7184 INCREASE/train/INCREASE_00310
7184 DESPITE/train/DESPITE_00498
7184 ASKED/test/ASKED_00048
7184 RATES/train/RATES_00372
7184 COMPANIES/train/COMPANIES_00985
7184 RECORD/train/RECORD_00673
7184 TODAY/train/TODAY_00920
7184 PLACE/train/PLACE_00093
7184 SYRIA/train/SYRIA_00131
7184 CANCER/train/CANCER_00363
7184 EARLY/train/EARLY_00976
7184 MILLIONS/val/MILLIONS_00033
7184 HOUSE/train/HOUSE_00086
7184 EMERGENCY/train/EMERGENCY_00286
7184 TRADE/train/TRADE_00715
7184 AUTHORITIES/train/AUTHORITIES_00660
7184 MILLIONS/train/MILLIONS_00858
7184 EXPECTED/train/EXPECTED_00742
7184 CRISIS/train/CRISIS_00208
7184 TRIAL/train/TRIAL_00113
7184 AFRICA/val/AFRICA_00008
7184 FAMILIES/train/FAMILIES_00885
7184 ISLAMIC/train/ISLAMIC_00681
7184 COMPANIES/train/COMPANIES_00668
7184 DEATH/train/DEATH_00136
7184 MEDICAL/train/MEDICAL_00818
7184 ENGLAND/test/ENGLAND_00047
7184 UNDER/val/UNDER_00029
7184 UNITED/val/UNITED_00040
7184 EVIDENCE/train/EVIDENCE_00847
7184 BECOME/train/BECOME_00425
7184 MURDER/val/MURDER_00010
7184 HEARD/val/HEARD_00021
7184 FINANCIAL/train/FINANCIAL_00246
7184 PHONE/train/PHONE_00639
7184 MEASURES/train/MEASURES_00642
7184 SYRIAN/train/SYRIAN_00693
7184 HOURS/train/HOURS_00257
7184 USING/train/USING_00462
7184 DETAILS/train/DETAILS_00826
7184 MINUTES/train/MINUTES_00046
7184 STORY/train/STORY_00796
7184 WEATHER/train/WEATHER_00771
7184 FAMILIES/train/FAMILIES_00920
7184 STATE/train/STATE_00899
7184 OTHERS/train/OTHERS_00667
7184 ENGLAND/train/ENGLAND_00005
7184 MINUTES/train/MINUTES_00413
7184 ATTACKS/val/ATTACKS_00013
7184 HUNDREDS/train/HUNDREDS_00733
7184 GOVERNMENT/train/GOVERNMENT_00574
7184 THREE/train/THREE_00410
7184 SIDES/val/SIDES_00008
7184 FRONT/train/FRONT_00251
7184 WALES/train/WALES_00610
7184 CONTROL/test/CONTROL_00014
7184 POWERS/train/POWERS_00885
7184 ACCORDING/train/ACCORDING_00889
7184 COMING/train/COMING_00272
7184 TRYING/train/TRYING_00184
7184 FRENCH/train/FRENCH_00149
7184 STAFF/train/STAFF_00065
7184 OFFICE/val/OFFICE_00037
7184 LIVING/train/LIVING_00500
7184 PRESSURE/val/PRESSURE_00034
7184 SERIES/val/SERIES_00029
7184 TRADE/train/TRADE_00746
7184 STREET/train/STREET_00959
7184 SPECIAL/train/SPECIAL_00684
7184 LATER/train/LATER_00590
7184 GUILTY/train/GUILTY_00463
7184 STAFF/val/STAFF_00009
7184 STAFF/train/STAFF_00161
7184 CANCER/val/CANCER_00043
7184 AFTER/train/AFTER_00107
7184 MISSING/train/MISSING_00619
7184 HOUSING/train/HOUSING_00191
7184 AUTHORITIES/test/AUTHORITIES_00011
7184 AGAIN/train/AGAIN_00949
7184 BEING/train/BEING_00521
7184 AFTER/train/AFTER_00136
7184 REPORTS/train/REPORTS_00510
7184 WEATHER/train/WEATHER_00295
7184 SYRIA/test/SYRIA_00049
7184 FRENCH/train/FRENCH_00960
7184 CANCER/val/CANCER_00015
7184 DAVID/train/DAVID_00380
7184 EXPECTED/val/EXPECTED_00017
7184 FIRST/val/FIRST_00017
7184 CALLED/train/CALLED_00949
7184 FIGURES/val/FIGURES_00049
7184 CHANGES/train/CHANGES_00333
7184 SECOND/train/SECOND_00136
7184 UNION/train/UNION_00204
7184 HEALTH/train/HEALTH_00739
7184 AMONG/test/AMONG_00031
7184 SERIES/train/SERIES_00633
7184 STATES/train/STATES_00039
7184 CLOSE/val/CLOSE_00034
7184 HEALTH/train/HEALTH_00033
7184 OBAMA/train/OBAMA_00209
7184 FUTURE/train/FUTURE_00134
7184 INDUSTRY/train/INDUSTRY_00584
7184 PHONE/train/PHONE_00609
7184 SECRETARY/train/SECRETARY_00697
7184 LIKELY/train/LIKELY_00408
7184 REPORT/val/REPORT_00042
7184 YOUNG/train/YOUNG_00320
7184 COMING/train/COMING_00647
7184 PARTY/train/PARTY_00191
7184 ORDER/val/ORDER_00046
7184 FAMILY/train/FAMILY_00895
7184 CLAIMS/test/CLAIMS_00022
7184 ACCUSED/train/ACCUSED_00289
7184 TRIAL/train/TRIAL_00052
7184 HEALTH/val/HEALTH_00037
7184 RESPONSE/train/RESPONSE_00524
7184 PRICES/train/PRICES_00495
7184 OUTSIDE/train/OUTSIDE_00052
7184 OFFICIALS/train/OFFICIALS_00842
7184 BIGGEST/train/BIGGEST_00698
7184 THOUSANDS/train/THOUSANDS_00437
7184 PHONE/train/PHONE_00541
7184 LATEST/val/LATEST_00013
7184 PRICE/train/PRICE_00598
7184 CERTAINLY/train/CERTAINLY_00637
7184 ACCORDING/train/ACCORDING_00952
7184 LATER/train/LATER_00312
7184 WITHIN/train/WITHIN_00380
7184 PLANS/train/PLANS_00710
7184 MEMBERS/val/MEMBERS_00031
7184 MINISTER/test/MINISTER_00001
7184 EVERY/train/EVERY_00900
7184 CHILD/train/CHILD_00468
7184 CALLED/train/CALLED_00838
7184 AGREE/train/AGREE_00596
7184 MONTH/train/MONTH_00753
7184 PHONE/val/PHONE_00026
7184 POLITICIANS/train/POLITICIANS_00648
7184 OFFICIALS/train/OFFICIALS_00542
7184 DESCRIBED/train/DESCRIBED_00067
7184 LEADER/train/LEADER_00711
7184 WINDS/train/WINDS_00736
7184 MINISTERS/train/MINISTERS_00033
7184 CHINA/train/CHINA_00544
7184 LEADERS/train/LEADERS_00456
7184 MISSING/train/MISSING_00554
7184 GENERAL/val/GENERAL_00005
7184 BEFORE/train/BEFORE_00262
7184 ATTACKS/train/ATTACKS_00619
7184 EMERGENCY/train/EMERGENCY_00390
7184 WORST/train/WORST_00248
7184 SCHOOL/train/SCHOOL_00098
7184 CHARGES/train/CHARGES_00002
7184 ENERGY/train/ENERGY_00884
7184 HEALTH/train/HEALTH_00857
7184 UNITED/train/UNITED_00935
7184 EVIDENCE/train/EVIDENCE_00092
7184 FOUND/train/FOUND_00098
7184 INCREASE/train/INCREASE_00813
7184 REPORTS/train/REPORTS_00157
7184 WANTED/train/WANTED_00589
7184 TALKING/train/TALKING_00262
7184 OTHERS/train/OTHERS_00715
7184 PERSONAL/train/PERSONAL_00327
7184 GLOBAL/train/GLOBAL_00204
7184 SPECIAL/train/SPECIAL_00137
7184 MILLION/train/MILLION_00507
7184 ASKED/train/ASKED_00847
7184 FORMER/train/FORMER_00717
7184 OPERATION/train/OPERATION_00623
7184 DEATH/train/DEATH_00293
7184 QUESTION/train/QUESTION_00217
7184 ACCUSED/val/ACCUSED_00050
7184 WEATHER/train/WEATHER_00943
7184 LEVELS/train/LEVELS_00696
7184 ALLEGATIONS/train/ALLEGATIONS_00288
7184 PARTIES/train/PARTIES_00322
7184 GROUP/train/GROUP_00618
7184 ENERGY/train/ENERGY_00280
7184 COMPANY/train/COMPANY_00945
7184 WALES/train/WALES_00496
7184 YESTERDAY/train/YESTERDAY_00791
7184 HUNDREDS/val/HUNDREDS_00031
7184 WORST/train/WORST_00765
7184 SECRETARY/train/SECRETARY_00169
7184 SIGNIFICANT/train/SIGNIFICANT_00550
7184 EXPECTED/train/EXPECTED_00228
7184 THIRD/train/THIRD_00738
7184 INCREASE/train/INCREASE_00227
7184 JAMES/train/JAMES_00136
7184 ACCESS/train/ACCESS_00843
7184 CASES/train/CASES_00145
7184 BIGGEST/test/BIGGEST_00018
7184 INDEPENDENT/train/INDEPENDENT_00498
7184 CHANCE/train/CHANCE_00546
7184 CHALLENGE/train/CHALLENGE_00042
7184 STATES/train/STATES_00084
7184 RULES/train/RULES_00497
7184 ACCORDING/train/ACCORDING_00706
7184 SECURITY/train/SECURITY_00152
7184 STATES/val/STATES_00044
7184 CHANGES/train/CHANGES_00620
7184 CANCER/train/CANCER_00056
7184 BETTER/train/BETTER_00085
7184 CANCER/train/CANCER_00796
7184 BLACK/train/BLACK_00645
7184 TAKEN/train/TAKEN_00868
7184 POLICE/train/POLICE_00274
7184 IRELAND/train/IRELAND_00240
7184 SOUTH/train/SOUTH_00860
7184 DESCRIBED/val/DESCRIBED_00046
7184 WITHIN/train/WITHIN_00562
7184 SECTOR/test/SECTOR_00006
7184 PRISON/train/PRISON_00701
7184 YESTERDAY/train/YESTERDAY_00144
7184 SHORT/train/SHORT_00839
7184 JUDGE/train/JUDGE_00777
7184 CANCER/test/CANCER_00002
7184 MIGRANTS/train/MIGRANTS_00786
7184 CASES/train/CASES_00350
7184 SOCIAL/train/SOCIAL_00464
7184 WHILE/train/WHILE_00897
7184 SOCIAL/test/SOCIAL_00049
7184 MINUTES/train/MINUTES_00099
7184 MORNING/train/MORNING_00988
7184 HOSPITAL/val/HOSPITAL_00047
7184 TALKS/val/TALKS_00006
7184 SENIOR/train/SENIOR_00226
7184 PARENTS/train/PARENTS_00969
7184 IRELAND/train/IRELAND_00086
7184 PROBLEM/train/PROBLEM_00644
7184 WARNING/train/WARNING_00744
7184 AFRICA/test/AFRICA_00050
7184 OTHERS/val/OTHERS_00015
7184 EXPECTED/train/EXPECTED_00536
7184 BEING/val/BEING_00005
7184 BUSINESS/train/BUSINESS_00749
7184 AGREE/val/AGREE_00048
7184 AHEAD/train/AHEAD_00244
7184 LOOKING/train/LOOKING_00768
7184 AFTER/test/AFTER_00030
7184 ACCORDING/train/ACCORDING_00439
7184 INFORMATION/train/INFORMATION_00723
7184 FIGURES/train/FIGURES_00813
7184 MISSING/train/MISSING_00068
7184 STARTED/train/STARTED_00079
7184 SECRETARY/train/SECRETARY_00574
7184 SCHOOL/train/SCHOOL_00824
7184 FIGHTING/train/FIGHTING_00846
7184 POLITICAL/train/POLITICAL_00069
7184 SIGNIFICANT/test/SIGNIFICANT_00012
7184 SINCE/test/SINCE_00031
7184 SERIES/train/SERIES_00372
7184 ABUSE/val/ABUSE_00008
7184 WARNING/val/WARNING_00039
7184 HIGHER/train/HIGHER_00882
7184 BUSINESS/train/BUSINESS_00139
7184 FOUND/val/FOUND_00027
7184 SPENT/val/SPENT_00043
7184 PRISON/train/PRISON_00116
7184 RULES/train/RULES_00247
7184 SPEECH/train/SPEECH_00196
7184 CONTROL/train/CONTROL_00815
7184 MINUTES/val/MINUTES_00023
7184 FRANCE/train/FRANCE_00187
7184 ISSUE/val/ISSUE_00002
7184 MILLION/test/MILLION_00019
7184 WOMEN/train/WOMEN_00361
7184 BUSINESSES/train/BUSINESSES_00427
7184 FUTURE/train/FUTURE_00406
7184 KNOWN/train/KNOWN_00480
7184 STILL/val/STILL_00008
7184 EXPECTED/train/EXPECTED_00538
7184 SOCIAL/train/SOCIAL_00415
7184 UNTIL/train/UNTIL_00471
7184 AREAS/train/AREAS_00450
7184 FINANCIAL/train/FINANCIAL_00820
7184 THREE/train/THREE_00533
7184 USING/train/USING_00302
7184 FUTURE/train/FUTURE_00018
7184 MISSING/train/MISSING_00443
7184 POLITICAL/val/POLITICAL_00013
7184 COURT/train/COURT_00362
7184 YOUNG/test/YOUNG_00046
7184 WORLD/train/WORLD_00184
7184 PARENTS/train/PARENTS_00726
7184 MISSING/train/MISSING_00246
7184 OFFICE/test/OFFICE_00050
7184 CONFERENCE/train/CONFERENCE_00439
7184 BILLION/train/BILLION_00758
7184 OPPOSITION/train/OPPOSITION_00406
7184 ASKED/train/ASKED_00743
7184 EMERGENCY/val/EMERGENCY_00027
7184 OFFICERS/train/OFFICERS_00682
7184 FORCE/train/FORCE_00002
7184 MURDER/test/MURDER_00047
7184 LATEST/val/LATEST_00035
7184 HISTORY/train/HISTORY_00306
7184 ACTION/train/ACTION_00788
7184 STATE/val/STATE_00004
7184 NUMBER/test/NUMBER_00028
7184 POWER/test/POWER_00048
7184 ABUSE/train/ABUSE_00568
7184 VICTIMS/train/VICTIMS_00824
7184 WINDS/test/WINDS_00044
7184 COUPLE/val/COUPLE_00021
7184 COMMUNITY/test/COMMUNITY_00048
7184 CAMPAIGN/test/CAMPAIGN_00010
7184 VICTIMS/train/VICTIMS_00955
7184 FOUND/train/FOUND_00986
7184 BANKS/train/BANKS_00687
7184 EUROPE/train/EUROPE_00734
7184 LATER/val/LATER_00029
7184 YEARS/test/YEARS_00011
7184 PLACES/train/PLACES_00472
7184 MINISTERS/train/MINISTERS_00068
7184 MAKING/train/MAKING_00202
7184 JUDGE/test/JUDGE_00023
7184 STILL/train/STILL_00931
7184 GROUP/train/GROUP_00823
7184 LEADERSHIP/train/LEADERSHIP_00292
7184 EXPECTED/test/EXPECTED_00005
7184 OFFICERS/train/OFFICERS_00446
7184 SERVICES/train/SERVICES_00804
7184 NUMBER/val/NUMBER_00001
7184 SOUTH/train/SOUTH_00057
7184 INCREASE/train/INCREASE_00739
7184 INTEREST/train/INTEREST_00129
7184 AGREEMENT/train/AGREEMENT_00247
7184 SOMETHING/test/SOMETHING_00005
7184 TRIAL/test/TRIAL_00027
7184 FOUND/train/FOUND_00454
7184 DECISION/train/DECISION_00065
7184 RESPONSE/train/RESPONSE_00253
7184 CONFERENCE/val/CONFERENCE_00016
7184 IMMIGRATION/train/IMMIGRATION_00857
7184 OBAMA/train/OBAMA_00170
7184 MORNING/train/MORNING_00003
7184 PHONE/train/PHONE_00215
7184 STORY/val/STORY_00016
7184 MINUTES/test/MINUTES_00012
7184 PATIENTS/train/PATIENTS_00830
7184 PAYING/val/PAYING_00022
7184 FAMILY/train/FAMILY_00513
7184 WATER/val/WATER_00040
7184 LATER/test/LATER_00008
7184 MISSING/train/MISSING_00391
7184 DEBATE/val/DEBATE_00042
7184 MAJOR/train/MAJOR_00319
7184 KILLED/train/KILLED_00776
7184 GROWING/train/GROWING_00656
7184 UNDER/val/UNDER_00022
7184 FIRST/test/FIRST_00039
7184 SENSE/test/SENSE_00033
7184 DIFFERENT/train/DIFFERENT_00877
7184 MANCHESTER/train/MANCHESTER_00294
7184 ACCORDING/train/ACCORDING_00455
7184 WORLD/train/WORLD_00772
7184 CHARGES/test/CHARGES_00032
7184 SERVICE/train/SERVICE_00115
7184 PEOPLE/train/PEOPLE_00959
7184 INDEPENDENT/train/INDEPENDENT_00427
7184 YEARS/train/YEARS_00376
7184 FIGHTING/train/FIGHTING_00132
7184 ALLOWED/train/ALLOWED_00410
7184 AFTERNOON/test/AFTERNOON_00044
7184 AFRICA/train/AFRICA_00442
7184 SERVICE/val/SERVICE_00043
7184 IMPACT/train/IMPACT_00959
7184 MIGHT/train/MIGHT_00139
7184 PATIENTS/train/PATIENTS_00276
7184 SCHOOL/train/SCHOOL_00500
7184 MIGRANTS/val/MIGRANTS_00047
7184 STATEMENT/train/STATEMENT_00070
7184 AMERICAN/train/AMERICAN_00948
7184 LEVELS/train/LEVELS_00886
7184 YEARS/train/YEARS_00151
7184 PEOPLE/train/PEOPLE_00003
7184 FORCES/train/FORCES_00361
7184 MOMENT/train/MOMENT_00373
7184 ENGLAND/train/ENGLAND_00415
7184 WORLD/train/WORLD_00581
7184 RULES/train/RULES_00225
7184 PLANS/train/PLANS_00814
7184 PRICE/train/PRICE_00179
7184 AMERICAN/train/AMERICAN_00980
7184 VICTIMS/test/VICTIMS_00033
7184 ALMOST/train/ALMOST_00173
7184 HOURS/train/HOURS_00873
7184 FRENCH/train/FRENCH_00104
7184 WORKERS/train/WORKERS_00587
7184 DEATH/train/DEATH_00975
7184 OTHER/val/OTHER_00010
7184 SYRIA/train/SYRIA_00278
7184 OFFICERS/train/OFFICERS_00677
7184 RATES/train/RATES_00803
7184 TRADE/train/TRADE_00509
7184 FOUND/train/FOUND_00076
7184 DEATH/train/DEATH_00476
7184 CURRENT/train/CURRENT_00832
7184 MIGRANTS/train/MIGRANTS_00112
7184 PATIENTS/train/PATIENTS_00335
7184 CAPITAL/train/CAPITAL_00166
7184 STORY/train/STORY_00239
7184 HEALTH/train/HEALTH_00446
7184 OFTEN/train/OFTEN_00886
7184 RUSSIA/train/RUSSIA_00754
7184 VIOLENCE/train/VIOLENCE_00222
7184 DEBATE/train/DEBATE_00928
7184 LATER/test/LATER_00033
7184 COMING/train/COMING_00153
7184 POLICE/train/POLICE_00462
7184 AGAINST/train/AGAINST_00533
7184 DURING/test/DURING_00005
7184 MEASURES/train/MEASURES_00403
7184 PROTECT/train/PROTECT_00710
7184 LABOUR/train/LABOUR_00978
7184 COMPANIES/train/COMPANIES_00986
7184 PARENTS/train/PARENTS_00592
7184 SERIES/train/SERIES_00164
7184 MINISTERS/val/MINISTERS_00016
7184 INFORMATION/test/INFORMATION_00046
7184 WORST/train/WORST_00183
7184 HOMES/train/HOMES_00368
7184 LATEST/val/LATEST_00007
7184 OFFICIALS/train/OFFICIALS_00711
7184 LOOKING/train/LOOKING_00093
7184 MONTH/train/MONTH_00216
7184 MIGRANTS/train/MIGRANTS_00001
7184 MINUTES/train/MINUTES_00993
7184 TAKING/train/TAKING_00541
7184 MIGHT/train/MIGHT_00728
7184 WEATHER/train/WEATHER_00562
7184 LEGAL/train/LEGAL_00778
7184 ALLOWED/train/ALLOWED_00391
7184 PARENTS/train/PARENTS_00682
7184 WARNING/train/WARNING_00699
7184 CONTINUE/train/CONTINUE_00124
7184 VICTIMS/train/VICTIMS_00297
7184 FACING/train/FACING_00814
7184 MORNING/train/MORNING_00506
7184 STILL/val/STILL_00025
7184 OUTSIDE/train/OUTSIDE_00725
7184 TRIAL/test/TRIAL_00030
7184 RUSSIA/val/RUSSIA_00018
7184 POINT/train/POINT_00329
7184 FAMILY/train/FAMILY_00467
7184 CONCERNS/train/CONCERNS_00768
7184 WESTERN/train/WESTERN_00539
7184 ISLAMIC/train/ISLAMIC_00378
7184 OFTEN/train/OFTEN_00439
7184 UNDER/train/UNDER_00807
7184 PHONE/test/PHONE_00010
7184 LEVELS/test/LEVELS_00001
7184 PLACE/test/PLACE_00018
7184 PRICES/train/PRICES_00846
7184 ACCUSED/train/ACCUSED_00961
7184 PERHAPS/train/PERHAPS_00198
7184 WALES/train/WALES_00665
7184 ENGLAND/train/ENGLAND_00817
7184 STORY/train/STORY_00742
7184 CLAIMS/train/CLAIMS_00514
7184 SIGNIFICANT/train/SIGNIFICANT_00554
7184 MEMBER/train/MEMBER_00520
7184 SMALL/train/SMALL_00423
7184 WORST/train/WORST_00550
7184 LEVEL/train/LEVEL_00550
7184 ALLEGATIONS/test/ALLEGATIONS_00046
7184 ALMOST/train/ALMOST_00251
7184 JUDGE/train/JUDGE_00003
7184 CANCER/train/CANCER_00197
7184 GROWING/val/GROWING_00036
7184 TODAY/train/TODAY_00731
7184 GREAT/train/GREAT_00636
7184 SYRIAN/train/SYRIAN_00737
7184 BIGGEST/test/BIGGEST_00015
7184 UNDERSTAND/train/UNDERSTAND_00171
7184 COMPANIES/val/COMPANIES_00008
7184 PARENTS/train/PARENTS_00076
7184 WEATHER/train/WEATHER_00334
7184 AMERICAN/train/AMERICAN_00115
7184 DURING/train/DURING_00727
7184 CRISIS/test/CRISIS_00047
7184 FACING/train/FACING_00083
7184 NIGHT/train/NIGHT_00842
7184 WITHOUT/train/WITHOUT_00051
7184 WORKERS/train/WORKERS_00159
7184 MONTH/train/MONTH_00574
7184 WARNING/train/WARNING_00589
7184 CENTRAL/train/CENTRAL_00015
7184 CHIEF/train/CHIEF_00866
7184 VICTIMS/train/VICTIMS_00443
7184 BUDGET/train/BUDGET_00664
7184 WEEKS/train/WEEKS_00836
7184 LATEST/train/LATEST_00166
7184 CHILD/train/CHILD_00206
7184 MEASURES/train/MEASURES_00293
7184 TALKING/train/TALKING_00598
7184 MEETING/train/MEETING_00134
7184 PATIENTS/train/PATIENTS_00429
7184 STORY/train/STORY_00526
7184 COMES/train/COMES_00516
7184 MEDICAL/train/MEDICAL_00351
7184 MEMBERS/train/MEMBERS_00015
7184 UNTIL/train/UNTIL_00717
7184 EXPECT/val/EXPECT_00035
7184 STATES/train/STATES_00618
7184 ALLOW/train/ALLOW_00751
7184 LATER/train/LATER_00638
7184 PRISON/train/PRISON_00840
7184 JUSTICE/val/JUSTICE_00040
7184 VICTIMS/train/VICTIMS_00969
7184 POINT/train/POINT_00632
7184 PERIOD/train/PERIOD_00395
7184 CAPITAL/train/CAPITAL_00888
7184 NORTHERN/train/NORTHERN_00151
7184 GROWING/train/GROWING_00550
7184 MONTH/train/MONTH_00862
7184 WHICH/train/WHICH_00411
7184 SPENDING/train/SPENDING_00490
7184 PROBLEMS/val/PROBLEMS_00012
7184 PRISON/train/PRISON_00202
7184 PLANS/train/PLANS_00060
7184 AFRICA/train/AFRICA_00311
7184 GROWING/train/GROWING_00616
7184 OFFICE/val/OFFICE_00045
7184 PRISON/train/PRISON_00823
7184 STAFF/train/STAFF_00027
7184 SPEND/test/SPEND_00029
7184 THEIR/train/THEIR_00727
7184 MINUTES/train/MINUTES_00868
7184 KNOWN/train/KNOWN_00559
7184 EARLY/train/EARLY_00801
7184 COULD/train/COULD_00110
7184 THREE/train/THREE_00890
7184 WEEKEND/val/WEEKEND_00010
7184 GROUND/train/GROUND_00463
7184 SENIOR/val/SENIOR_00043
7184 TRADE/train/TRADE_00043
7184 KILLED/train/KILLED_00136
7184 EXACTLY/train/EXACTLY_00484
7184 CHALLENGE/train/CHALLENGE_00364
7184 DETAILS/train/DETAILS_00851
7184 MINISTER/val/MINISTER_00027
7184 FRENCH/train/FRENCH_00315
7184 TAKEN/train/TAKEN_00681
7184 SYRIAN/train/SYRIAN_00789
7184 TRUST/val/TRUST_00019
7184 ACROSS/test/ACROSS_00014
7184 INDUSTRY/val/INDUSTRY_00036
7184 ENERGY/train/ENERGY_00722
7184 THOSE/train/THOSE_00456
7184 SECRETARY/train/SECRETARY_00115
7184 REPORTS/train/REPORTS_00086
7184 FAMILY/train/FAMILY_00090
7184 PLANS/test/PLANS_00037
7184 GROUP/train/GROUP_00596
7184 JAMES/val/JAMES_00001
7184 ANNOUNCED/val/ANNOUNCED_00019
7184 AFFAIRS/train/AFFAIRS_00129
7184 CHANGES/train/CHANGES_00822
7184 MILLION/train/MILLION_00330
7184 POWER/train/POWER_00797
7184 LEAST/train/LEAST_00484
7184 BUILD/train/BUILD_00795
7184 CASES/train/CASES_00740
7184 POWER/train/POWER_00780
7184 TODAY/test/TODAY_00014
7184 DURING/train/DURING_00449
7184 FORMER/test/FORMER_00044
7184 SYRIAN/train/SYRIAN_00044
7184 HEAVY/train/HEAVY_00993
7184 ACCORDING/train/ACCORDING_00497
7184 PARLIAMENT/train/PARLIAMENT_00162
7184 EARLY/train/EARLY_00319
7184 KNOWN/train/KNOWN_00714
7184 MILLION/train/MILLION_00973
7184 AGAINST/test/AGAINST_00018
7184 MINUTES/train/MINUTES_00655
7184 ENGLAND/train/ENGLAND_00875
7184 MORNING/train/MORNING_00856
7184 AGAINST/train/AGAINST_00482
7184 GREAT/train/GREAT_00775
7184 MEMBERS/train/MEMBERS_00166
7184 HEART/train/HEART_00131
7184 EASTERN/train/EASTERN_00369
7184 THOUSANDS/train/THOUSANDS_00671
7184 INDEPENDENT/val/INDEPENDENT_00001
7184 INDEPENDENT/val/INDEPENDENT_00026
7184 AFTER/train/AFTER_00788
7184 ACTION/val/ACTION_00034
7184 INDUSTRY/train/INDUSTRY_00497
7184 LEADER/train/LEADER_00658
7184 ENERGY/train/ENERGY_00471
7184 COMES/train/COMES_00164
7184 INTEREST/train/INTEREST_00536
7184 MEMBERS/train/MEMBERS_00716
7184 LARGE/train/LARGE_00660
7184 SEVERAL/train/SEVERAL_00837
7184 THOUSANDS/train/THOUSANDS_00460
7184 INCREASE/train/INCREASE_00116
7184 ACCORDING/train/ACCORDING_00719
7184 STILL/test/STILL_00026
7184 GROUP/val/GROUP_00015
7184 INVOLVED/val/INVOLVED_00015
7184 STARTED/train/STARTED_00056
7184 MONTHS/val/MONTHS_00047
7184 SERVICES/test/SERVICES_00022
7184 INVESTMENT/train/INVESTMENT_00774
7184 KNOWN/train/KNOWN_00937
7184 COUNTRIES/train/COUNTRIES_00280
7184 CHILD/train/CHILD_00175
7184 ACCORDING/train/ACCORDING_00634
7184 PRESIDENT/test/PRESIDENT_00028
7184 CONTROL/train/CONTROL_00234
7184 FOUND/train/FOUND_00381
7184 EDUCATION/test/EDUCATION_00040
7184 LEADERSHIP/train/LEADERSHIP_00434
7184 OFFICERS/train/OFFICERS_00953
7184 ISSUE/train/ISSUE_00036
7184 LEAST/train/LEAST_00384
7184 SECURITY/train/SECURITY_00952
7184 STORY/train/STORY_00569
7184 MAKES/test/MAKES_00025
7184 TAKING/train/TAKING_00924
7184 INVOLVED/train/INVOLVED_00278
7184 WITHIN/train/WITHIN_00848
7184 FACING/train/FACING_00404
7184 HAPPENING/train/HAPPENING_00847
7184 FRONT/train/FRONT_00778
7184 LEADER/train/LEADER_00374
7184 ACROSS/train/ACROSS_00560
7184 DESCRIBED/val/DESCRIBED_00015
7184 CONFLICT/test/CONFLICT_00006
7184 LONDON/train/LONDON_00632
7184 AGAINST/test/AGAINST_00009
7184 OUTSIDE/train/OUTSIDE_00108
7184 OFFICE/val/OFFICE_00046
7184 CAMPAIGN/train/CAMPAIGN_00902
7184 MILLION/val/MILLION_00013
7184 SHOULD/train/SHOULD_00562
7184 SPENT/train/SPENT_00441
7184 EXPECTED/train/EXPECTED_00873
7184 ARRESTED/val/ARRESTED_00041
7184 VICTIMS/train/VICTIMS_00765
7184 KILLED/val/KILLED_00030
7184 FINANCIAL/train/FINANCIAL_00392
7184 POWERS/train/POWERS_00726
7184 COULD/train/COULD_00816
7184 COUPLE/val/COUPLE_00033
7184 AFFAIRS/train/AFFAIRS_00586
7184 FOOTBALL/train/FOOTBALL_00705
7184 SOCIAL/train/SOCIAL_00080
7184 CONTINUE/val/CONTINUE_00044
7184 AHEAD/train/AHEAD_00662
7184 COMES/train/COMES_00715
7184 SUPPORT/train/SUPPORT_00671
7184 FRENCH/train/FRENCH_00835
7184 PRIME/train/PRIME_00437
7184 MORNING/train/MORNING_00932
7184 BILLION/train/BILLION_00666
7184 LEVEL/train/LEVEL_00005
7184 LATEST/train/LATEST_00428
7184 ABOUT/val/ABOUT_00008
7184 SEVERAL/train/SEVERAL_00910
7184 INCREASE/train/INCREASE_00669
7184 SPEAKING/train/SPEAKING_00287
7184 FIGHT/train/FIGHT_00244
7184 WESTMINSTER/train/WESTMINSTER_00028
7184 BILLION/train/BILLION_00853
7184 ENGLAND/train/ENGLAND_00983
7184 FRENCH/val/FRENCH_00029
7184 BUILD/train/BUILD_00808
7184 HOMES/train/HOMES_00742
7184 GOVERNMENT/train/GOVERNMENT_00332
7184 CHILD/train/CHILD_00422
7184 LEADERSHIP/train/LEADERSHIP_00495
7184 RECENT/train/RECENT_00453
7184 LOCAL/test/LOCAL_00023
7184 CHILDREN/val/CHILDREN_00015
7184 SPENDING/train/SPENDING_00135
7184 ABOUT/train/ABOUT_00090
7184 SHOULD/train/SHOULD_00518
7184 DEATH/train/DEATH_00297
7184 RECENT/val/RECENT_00027
7184 HEALTH/train/HEALTH_00717
7184 MIGRANTS/train/MIGRANTS_00225
7184 EXACTLY/train/EXACTLY_00422
7184 ACCORDING/train/ACCORDING_00789
7184 WEATHER/train/WEATHER_00233
7184 TERMS/train/TERMS_00430
7184 UNTIL/train/UNTIL_00394
7184 ASKING/train/ASKING_00644
7184 FORCE/train/FORCE_00945
7184 ACCORDING/train/ACCORDING_00722
7184 POLITICAL/test/POLITICAL_00031
7184 WHICH/train/WHICH_00487
7184 EXPECT/val/EXPECT_00048
7184 SPENT/train/SPENT_00312
7184 ATTACK/test/ATTACK_00028
7184 HOUSING/train/HOUSING_00234
7184 MEASURES/train/MEASURES_00884
7184 LONGER/train/LONGER_00376
7184 HOURS/train/HOURS_00583
7184 BRITAIN/val/BRITAIN_00028
7184 MORNING/train/MORNING_00603
7184 SOCIETY/train/SOCIETY_00698
7184 BUSINESS/train/BUSINESS_00081
7184 SERVICE/test/SERVICE_00035
7184 PHONE/train/PHONE_00316
7184 ATTACK/train/ATTACK_00612
7184 WEATHER/train/WEATHER_00485
7184 BILLION/train/BILLION_00057
7184 MEMBERS/train/MEMBERS_00474
7184 EVENTS/test/EVENTS_00006
7184 CHANGE/train/CHANGE_00150
7184 GROUND/train/GROUND_00230
7184 MINUTES/train/MINUTES_00022
7184 FAMILY/train/FAMILY_00203
7184 AFRICA/val/AFRICA_00023
7184 BRING/val/BRING_00010
7184 ORDER/val/ORDER_00050
7184 AFFAIRS/val/AFFAIRS_00021
7184 KNOWN/train/KNOWN_00769
7184 KILLED/train/KILLED_00986
7184 SPEECH/val/SPEECH_00039
7184 PROBLEM/val/PROBLEM_00023
7184 JAMES/train/JAMES_00096
7184 CRISIS/train/CRISIS_00493
7184 COUPLE/train/COUPLE_00687
7184 AFRICA/train/AFRICA_00478
7184 ECONOMIC/test/ECONOMIC_00026
7184 AGAIN/train/AGAIN_00866
7184 FACING/train/FACING_00143
7184 BRITAIN/train/BRITAIN_00261
7184 AFFECTED/test/AFFECTED_00017
7184 UNITED/train/UNITED_00332
7184 ISLAMIC/train/ISLAMIC_00619
7184 ANOTHER/train/ANOTHER_00577
7184 POTENTIAL/train/POTENTIAL_00349
7184 CRISIS/train/CRISIS_00534
7184 WEATHER/train/WEATHER_00617
7184 AMERICA/train/AMERICA_00703
7184 SECOND/train/SECOND_00760
7184 EMERGENCY/test/EMERGENCY_00002
7184 RESULT/train/RESULT_00679
7184 SOMEONE/val/SOMEONE_00027
7184 PRESS/test/PRESS_00029
7184 TAKEN/test/TAKEN_00041
7184 LIVING/train/LIVING_00660
7184 GLOBAL/train/GLOBAL_00006
7184 THOUGHT/train/THOUGHT_00723
7184 ENGLAND/train/ENGLAND_00712
7184 GAMES/train/GAMES_00738
7184 ACCORDING/train/ACCORDING_00837
7184 DOING/train/DOING_00036
7184 CONSERVATIVE/val/CONSERVATIVE_00022
7184 EDUCATION/train/EDUCATION_00474
7184 UNDER/train/UNDER_00827
7184 HOURS/test/HOURS_00021
7184 ALLOWED/train/ALLOWED_00099
7184 HOURS/test/HOURS_00042
7184 NUMBER/train/NUMBER_00197
7184 PLANS/train/PLANS_00685
7184 BUSINESSES/train/BUSINESSES_00691
7184 FRONT/train/FRONT_00700
7184 GIVEN/train/GIVEN_00307
7184 EARLY/train/EARLY_00302
7184 PERSONAL/train/PERSONAL_00157
7184 FORMER/train/FORMER_00654
7184 WEEKEND/train/WEEKEND_00769
7184 STATES/train/STATES_00746
7184 MILLIONS/val/MILLIONS_00032
7184 BIGGEST/val/BIGGEST_00047
7184 ACROSS/train/ACROSS_00614
7184 LATER/val/LATER_00019
7184 SPECIAL/train/SPECIAL_00698
7184 BENEFIT/val/BENEFIT_00013
7184 PRISON/train/PRISON_00191
7184 BLACK/train/BLACK_00175
7184 HISTORY/val/HISTORY_00047
7184 LEADERS/train/LEADERS_00478
7184 SINCE/val/SINCE_00034
7184 MOMENT/train/MOMENT_00604
7184 OBAMA/train/OBAMA_00519
7184 AFTER/train/AFTER_00493
7184 ECONOMIC/train/ECONOMIC_00416
7184 COUNTRIES/test/COUNTRIES_00025
7184 ENOUGH/train/ENOUGH_00578
7184 LEADERS/train/LEADERS_00734
7184 FINAL/train/FINAL_00387
7184 GEORGE/train/GEORGE_00257
7184 ALREADY/train/ALREADY_00712
7184 RECORD/train/RECORD_00354
7184 OPPOSITION/train/OPPOSITION_00796
7184 UNDERSTAND/val/UNDERSTAND_00005
7184 GROUP/train/GROUP_00395
7184 JUDGE/train/JUDGE_00380
7184 PERIOD/train/PERIOD_00469
7184 BANKS/train/BANKS_00716
7184 MURDER/train/MURDER_00672
7184 HEALTH/test/HEALTH_00019
7184 INCREASE/train/INCREASE_00583
7184 CAPITAL/train/CAPITAL_00102
7184 AMONG/val/AMONG_00031
7184 LATER/train/LATER_00393
7184 LEADERS/train/LEADERS_00303
7184 YOUNG/test/YOUNG_00028
7184 REPORTS/val/REPORTS_00050
7184 ATTACKS/train/ATTACKS_00829
7184 WITHIN/test/WITHIN_00022
7184 SOCIAL/train/SOCIAL_00824
7184 BILLION/train/BILLION_00515
7184 INQUIRY/train/INQUIRY_00657
7184 MESSAGE/train/MESSAGE_00193
7184 GIVEN/train/GIVEN_00184
7184 EXPECTED/train/EXPECTED_00263
7184 OTHER/train/OTHER_00506
7184 HOURS/train/HOURS_00665
7184 YESTERDAY/train/YESTERDAY_00171
7184 CLAIMS/train/CLAIMS_00164
7184 UNION/train/UNION_00782
7184 PARENTS/train/PARENTS_00382
7184 AFFECTED/train/AFFECTED_00776
7184 SOCIAL/val/SOCIAL_00020
7184 THIRD/train/THIRD_00316
7184 AFTER/train/AFTER_00817
7184 SINCE/val/SINCE_00006
7184 MAJOR/train/MAJOR_00794
7184 STATE/val/STATE_00001
7184 LATEST/val/LATEST_00019
7184 TAKEN/train/TAKEN_00758
7184 USING/train/USING_00571
7184 EMERGENCY/train/EMERGENCY_00214
7184 PATIENTS/train/PATIENTS_00685
7184 GOVERNMENT/train/GOVERNMENT_00684
7184 THREE/train/THREE_00983
7184 LEADER/train/LEADER_00200
7184 AMOUNT/train/AMOUNT_00802
7184 PARENTS/train/PARENTS_00670
7184 TAKING/train/TAKING_00104
7184 EMERGENCY/train/EMERGENCY_00630
7184 MISSING/train/MISSING_00757
7184 GROWING/train/GROWING_00786
7184 CHIEF/train/CHIEF_00375
7184 OFFICIALS/train/OFFICIALS_00223
7184 SINCE/test/SINCE_00009
7184 SYRIA/train/SYRIA_00419
7184 MEETING/train/MEETING_00622
7184 WORDS/train/WORDS_00940
7184 AMERICAN/train/AMERICAN_00328
7184 TRIAL/train/TRIAL_00536
7184 LOCAL/train/LOCAL_00239
7184 DURING/test/DURING_00033
7184 SECOND/train/SECOND_00035
7184 DAVID/train/DAVID_00122
7184 PROVIDE/train/PROVIDE_00438
7184 EXPECTED/train/EXPECTED_00673
7184 SERVICES/val/SERVICES_00041
7184 REFERENDUM/train/REFERENDUM_00707
7184 FOLLOWING/train/FOLLOWING_00250
7184 TODAY/val/TODAY_00023
7184 ANNOUNCED/train/ANNOUNCED_00149
7184 CRISIS/train/CRISIS_00932
7184 PARTY/train/PARTY_00726
7184 GROWING/train/GROWING_00444
7184 PRISON/train/PRISON_00885
7184 FOREIGN/train/FOREIGN_00351
7184 BANKS/train/BANKS_00451
7184 PLANS/train/PLANS_00401
7184 SEVERAL/train/SEVERAL_00186
7184 ATTACK/train/ATTACK_00545
7184 STATE/val/STATE_00007
7184 THING/train/THING_00928
7184 TODAY/train/TODAY_00912
7184 COMPANY/train/COMPANY_00578
7184 PARTS/train/PARTS_00777
7184 ANOTHER/train/ANOTHER_00999
7184 INCREASE/test/INCREASE_00005
7184 PARTIES/train/PARTIES_00531
7184 GAMES/train/GAMES_00578
7184 CENTRAL/train/CENTRAL_00259
7184 GENERAL/train/GENERAL_00301
7184 MINUTES/train/MINUTES_00196
7184 ACCUSED/test/ACCUSED_00001
7184 BILLION/train/BILLION_00091
7184 ENGLAND/train/ENGLAND_00980
7184 AHEAD/train/AHEAD_00946
7184 TALKS/train/TALKS_00081
7184 PERSONAL/train/PERSONAL_00426
7184 FRANCE/train/FRANCE_00775
7184 HAPPENING/train/HAPPENING_00180
7184 COMPANY/train/COMPANY_00052
7184 GAMES/train/GAMES_00154
7184 POWER/val/POWER_00017
7184 SCHOOL/train/SCHOOL_00722
7184 SCHOOL/train/SCHOOL_00911
7184 EUROPEAN/train/EUROPEAN_00684
7184 STAND/train/STAND_00194
7184 OBAMA/val/OBAMA_00016
7184 ANNOUNCED/train/ANNOUNCED_00435
7184 COMMUNITY/train/COMMUNITY_00642
7184 CONCERNS/train/CONCERNS_00539
7184 SCHOOLS/train/SCHOOLS_00724
7184 ENOUGH/train/ENOUGH_00849
7184 VICTIMS/train/VICTIMS_00505
7184 POTENTIAL/train/POTENTIAL_00683
7184 MATTER/train/MATTER_00770
7184 ALLEGATIONS/train/ALLEGATIONS_00848
7184 BUDGET/train/BUDGET_00491
7184 CAMPAIGN/train/CAMPAIGN_00331
7184 RIGHT/val/RIGHT_00034
7184 INSIDE/train/INSIDE_00487
7184 ATTACK/train/ATTACK_00484
7184 FAMILIES/test/FAMILIES_00047
7184 MILLIONS/train/MILLIONS_00123
7184 HOMES/train/HOMES_00053
7184 ALMOST/train/ALMOST_00634
7184 SERIES/train/SERIES_00403
7184 TOWARDS/train/TOWARDS_00674
7184 STAFF/train/STAFF_00325
7184 ISLAMIC/train/ISLAMIC_00566
7184 PARENTS/train/PARENTS_00085
7184 SPEECH/train/SPEECH_00532
7184 ENGLAND/train/ENGLAND_00923
7184 THEMSELVES/train/THEMSELVES_00398
7184 MESSAGE/test/MESSAGE_00028
7184 AMONG/train/AMONG_00841
7184 FACING/train/FACING_00871
7184 STRONG/train/STRONG_00211
7184 EMERGENCY/val/EMERGENCY_00006
7184 FORCE/test/FORCE_00050
7184 LOOKING/train/LOOKING_00188
7184 MASSIVE/val/MASSIVE_00033
7184 SPECIAL/train/SPECIAL_00765
7184 CLAIMS/val/CLAIMS_00049
7184 YEARS/train/YEARS_00081
7184 COUNCIL/train/COUNCIL_00863
7184 WOULD/train/WOULD_00611
7184 RETURN/val/RETURN_00040
7184 THOUSANDS/val/THOUSANDS_00038
7184 FOCUS/val/FOCUS_00007
7184 AFFECTED/train/AFFECTED_00290
7184 CALLED/train/CALLED_00084
7184 INDEPENDENT/train/INDEPENDENT_00827
7184 DESCRIBED/test/DESCRIBED_00004
7184 MINUTES/train/MINUTES_00017
7184 BEFORE/train/BEFORE_00312
7184 INQUIRY/train/INQUIRY_00360
7184 THOUSANDS/train/THOUSANDS_00486
7184 PARLIAMENT/train/PARLIAMENT_00471
7184 TERMS/train/TERMS_00683
7184 SOMEONE/train/SOMEONE_00637
7184 CUSTOMERS/train/CUSTOMERS_00216
7184 INFORMATION/train/INFORMATION_00892
7184 SEVERAL/test/SEVERAL_00035
7184 CANCER/train/CANCER_00024
7184 SECRETARY/test/SECRETARY_00024
7184 LONGER/train/LONGER_00357
7184 UNTIL/train/UNTIL_00979
7184 CHALLENGE/val/CHALLENGE_00013
7184 PRESS/test/PRESS_00025
7184 LIVING/val/LIVING_00043
7184 GLOBAL/train/GLOBAL_00025
7184 HEALTH/train/HEALTH_00893
7184 CHILDREN/train/CHILDREN_00919
7184 EXTRA/train/EXTRA_00366
7184 PRISON/train/PRISON_00260
7184 PRISON/train/PRISON_00834
7184 KILLED/train/KILLED_00177
7184 LEAVE/train/LEAVE_00535
7184 DESPITE/train/DESPITE_00655
7184 SOCIAL/train/SOCIAL_00607
7184 FORCE/train/FORCE_00433
7184 CHILDREN/train/CHILDREN_00028
7184 BENEFIT/train/BENEFIT_00020
7184 RESPONSE/train/RESPONSE_00665
7184 GETTING/val/GETTING_00031
7184 OFFICE/train/OFFICE_00441
7184 TRIAL/train/TRIAL_00803
7184 MAKES/train/MAKES_00230
7184 IMPACT/train/IMPACT_00934
7184 WHICH/train/WHICH_00345
7184 LONDON/train/LONDON_00004
7184 STAFF/train/STAFF_00374
7184 ACCESS/train/ACCESS_00609
7184 ACCORDING/train/ACCORDING_00503
7184 THOSE/train/THOSE_00256
7184 MONEY/train/MONEY_00390
7184 REASON/train/REASON_00074
7184 AMONG/val/AMONG_00014
7184 STAFF/train/STAFF_00774
7184 CANCER/train/CANCER_00593
7184 PRISON/test/PRISON_00016
7184 AFRICA/train/AFRICA_00295
7184 ITSELF/train/ITSELF_00591
7184 AFFECTED/train/AFFECTED_00151
7184 CALLED/train/CALLED_00366
7184 CAPITAL/train/CAPITAL_00711
7184 FACING/train/FACING_00016
7184 AMERICAN/train/AMERICAN_00331
7184 FACING/train/FACING_00201
7184 ALLOWED/train/ALLOWED_00062
7184 GREAT/train/GREAT_00253
7184 WESTMINSTER/train/WESTMINSTER_00106
7184 WORST/train/WORST_00772
7184 ANOTHER/train/ANOTHER_00857
7184 FIGHTING/test/FIGHTING_00005
7184 FACING/val/FACING_00037
7184 CRIME/train/CRIME_00074
7184 PRIVATE/train/PRIVATE_00299
7184 FORWARD/train/FORWARD_00360
7184 RECORD/train/RECORD_00779
7184 AFFAIRS/test/AFFAIRS_00047
7184 PRESSURE/val/PRESSURE_00045
7184 PERSON/val/PERSON_00043
7184 RESULT/train/RESULT_00489
7184 PARTIES/train/PARTIES_00108
7184 EUROPEAN/train/EUROPEAN_00600
7184 STARTED/train/STARTED_00020
7184 WHILE/train/WHILE_00246
7184 GROUP/train/GROUP_00189
7184 MEANS/val/MEANS_00022
7184 HEALTH/train/HEALTH_00712
7184 SEEMS/train/SEEMS_00929
7184 THOSE/train/THOSE_00941
7184 PEOPLE/train/PEOPLE_00746
7184 PEOPLE/train/PEOPLE_00545
7184 FOUND/test/FOUND_00034
7184 CLOSE/train/CLOSE_00188
7184 LONDON/train/LONDON_00440
7184 HOSPITAL/train/HOSPITAL_00484
7184 CALLED/test/CALLED_00021
7184 MASSIVE/test/MASSIVE_00002
7184 ACCORDING/train/ACCORDING_00955
7184 INDEPENDENT/train/INDEPENDENT_00939
7184 MONTH/val/MONTH_00043
7184 HOURS/train/HOURS_00226
7184 PRESSURE/train/PRESSURE_00152
7184 HOUSE/train/HOUSE_00645
7184 WORST/train/WORST_00074
7184 QUESTIONS/test/QUESTIONS_00022
7184 PRISON/test/PRISON_00033
7184 LIKELY/train/LIKELY_00276
7184 EVERY/train/EVERY_00574
7184 WITHIN/train/WITHIN_00949
7184 STAND/train/STAND_00395
7184 STORY/train/STORY_00501
7184 ORDER/train/ORDER_00225
7184 MINISTERS/train/MINISTERS_00782
7184 TIMES/train/TIMES_00907
7184 ANSWER/train/ANSWER_00959
7184 CRIME/train/CRIME_00211
7184 FACING/train/FACING_00079
7184 THOUSANDS/val/THOUSANDS_00041
7184 AMERICAN/train/AMERICAN_00346
7184 PRISON/train/PRISON_00092
7184 COMPANY/train/COMPANY_00026
7184 OFFICE/val/OFFICE_00030
7184 TOMORROW/train/TOMORROW_00962
7184 IRELAND/train/IRELAND_00567
7184 HOURS/train/HOURS_00476
7184 FIGURES/val/FIGURES_00009
7184 AMERICAN/train/AMERICAN_00309
7184 TOWARDS/train/TOWARDS_00457
7184 POLITICIANS/train/POLITICIANS_00552
7184 HOSPITAL/test/HOSPITAL_00012
7184 BIGGEST/train/BIGGEST_00591
7184 BRITISH/train/BRITISH_00515
7184 ALLOW/train/ALLOW_00576
7184 TRUST/val/TRUST_00048
7184 HOURS/train/HOURS_00333
7184 ACCORDING/train/ACCORDING_00828
7184 FAMILY/train/FAMILY_00084
7184 FACING/train/FACING_00293
7184 EXPECTED/train/EXPECTED_00480
7184 REPORTS/train/REPORTS_00491
7184 GROWING/train/GROWING_00924
7184 MIDDLE/train/MIDDLE_00030
7184 FOUND/test/FOUND_00011
7184 SOCIAL/train/SOCIAL_00137
7184 MIGHT/train/MIGHT_00847
7184 WORDS/train/WORDS_00591
7184 CANCER/train/CANCER_00589
7184 EVERYTHING/train/EVERYTHING_00193
7184 CHILD/train/CHILD_00533
7184 SCHOOL/train/SCHOOL_00573
7184 LATER/train/LATER_00128
7184 FOLLOWING/val/FOLLOWING_00022
7184 CHALLENGE/train/CHALLENGE_00454
7184 SEEMS/train/SEEMS_00047
7184 THIRD/train/THIRD_00482
7184 PROTECT/train/PROTECT_00379
7184 TODAY/train/TODAY_00196
7184 HAVING/train/HAVING_00453
7184 LATEST/train/LATEST_00201
7184 HAPPENING/train/HAPPENING_00069
7184 CHIEF/train/CHIEF_00205
7184 SEVEN/val/SEVEN_00024
7184 KILLED/train/KILLED_00217
7184 HOSPITAL/train/HOSPITAL_00734
7184 ENGLAND/val/ENGLAND_00001
7184 CAPITAL/test/CAPITAL_00004
7184 THIRD/train/THIRD_00077
7184 FORCE/train/FORCE_00954
7184 RULES/test/RULES_00031
7184 COURT/train/COURT_00159
7184 SERIES/train/SERIES_00810
7184 BRITAIN/train/BRITAIN_00795
7184 CLOSE/train/CLOSE_00037
7184 TODAY/val/TODAY_00050
7184 STORY/train/STORY_00579
7184 PLANS/train/PLANS_00861
7184 BENEFITS/train/BENEFITS_00675
7184 CLAIMS/train/CLAIMS_00176
7184 DURING/train/DURING_00214
7184 WINDS/train/WINDS_00521
7184 PERHAPS/train/PERHAPS_00398
7184 CHINA/train/CHINA_00086
7184 PRESIDENT/train/PRESIDENT_00096
7184 SEVEN/train/SEVEN_00583
7184 EVENTS/train/EVENTS_00081
7184 ATTACKS/train/ATTACKS_00623
7184 MEDICAL/train/MEDICAL_00084
7184 PARTS/train/PARTS_00687
7184 CAMERON/train/CAMERON_00340
7184 WALES/train/WALES_00758
7184 CONFERENCE/train/CONFERENCE_00821
7184 TODAY/train/TODAY_00746
7184 SEVEN/test/SEVEN_00024
7184 CHINA/train/CHINA_00505
7184 DETAILS/train/DETAILS_00363
7184 HAPPEN/train/HAPPEN_00918
7184 PATIENTS/train/PATIENTS_00508
7184 TALKS/train/TALKS_00740
7184 MARKET/train/MARKET_00661
7184 EARLY/test/EARLY_00012
7184 SPENT/train/SPENT_00078
7184 WHETHER/train/WHETHER_00187
7184 PLANS/train/PLANS_00067
7184 ISLAMIC/train/ISLAMIC_00799
7184 AMERICA/train/AMERICA_00238
7184 BEING/train/BEING_00755
7184 EXPECTED/train/EXPECTED_00792
7184 SINGLE/train/SINGLE_00613
7184 TRADE/train/TRADE_00687
7184 LEVEL/train/LEVEL_00470
7184 BEING/train/BEING_00062
7184 GOVERNMENT/train/GOVERNMENT_00812
7184 SOCIAL/train/SOCIAL_00061
7184 TODAY/train/TODAY_00926
7184 CONCERNS/train/CONCERNS_00360
7184 STAFF/val/STAFF_00030
7184 LATEST/val/LATEST_00038
7184 COULD/val/COULD_00037
7184 CENTRAL/train/CENTRAL_00230
7184 MANCHESTER/test/MANCHESTER_00049
7184 ACCUSED/train/ACCUSED_00728
7184 EXPECTED/train/EXPECTED_00858
7184 MOMENT/train/MOMENT_00078
7184 PHONE/train/PHONE_00537
7184 SPENDING/train/SPENDING_00996
7184 GROWTH/train/GROWTH_00252
7184 AMERICAN/train/AMERICAN_00830
7184 CONTROL/train/CONTROL_00533
7184 TOGETHER/train/TOGETHER_00731
7184 PEOPLE/train/PEOPLE_00372
7184 MORNING/train/MORNING_00485
7184 LOOKING/val/LOOKING_00040
7184 PRESIDENT/train/PRESIDENT_00733
7184 GETTING/test/GETTING_00020
7184 AMERICA/train/AMERICA_00505
7184 BRING/train/BRING_00546
7184 UNTIL/train/UNTIL_00429
7184 RESULT/train/RESULT_00640
7184 ISSUES/train/ISSUES_00965
7184 REASON/train/REASON_00080
7184 WORKERS/train/WORKERS_00363
7184 MEANS/val/MEANS_00032
7184 ACCORDING/val/ACCORDING_00041
7184 DESPITE/train/DESPITE_00443
7184 GLOBAL/train/GLOBAL_00282
7184 GROWING/train/GROWING_00792
7184 KNOWN/train/KNOWN_00519
7184 IRELAND/test/IRELAND_00029
7184 FOREIGN/train/FOREIGN_00574
7184 FORCE/train/FORCE_00204
7184 VICTIMS/train/VICTIMS_00439
7184 SERVICE/train/SERVICE_00385
7184 ANNOUNCED/train/ANNOUNCED_00767
7184 BENEFIT/train/BENEFIT_00912
7184 AFTER/train/AFTER_00522
7184 SINCE/train/SINCE_00466
7184 ASKED/train/ASKED_00625
7184 OUTSIDE/train/OUTSIDE_00067
7184 DESCRIBED/val/DESCRIBED_00018
7184 EVERY/train/EVERY_00492
7184 AUTHORITIES/train/AUTHORITIES_00319
7184 PHONE/test/PHONE_00001
7184 EARLY/test/EARLY_00036
7184 DEATH/train/DEATH_00576
7184 GEORGE/train/GEORGE_00846
7184 PARENTS/train/PARENTS_00281
7184 SCOTTISH/train/SCOTTISH_00724
7184 COMING/train/COMING_00257
7184 CONTROL/val/CONTROL_00016
7184 CHILDREN/train/CHILDREN_00075
7184 NORTH/train/NORTH_00397
7184 CALLED/train/CALLED_00156
7184 ACCUSED/val/ACCUSED_00047
7184 LEADERS/train/LEADERS_00929
7184 REPORT/train/REPORT_00298
7184 GOVERNMENT/test/GOVERNMENT_00002
7184 EUROPE/train/EUROPE_00148
7184 SECRETARY/train/SECRETARY_00839
7184 STATE/train/STATE_00620
7184 YESTERDAY/train/YESTERDAY_00317
7184 COMMUNITY/train/COMMUNITY_00963
7184 GROWING/val/GROWING_00027
7184 MILLION/train/MILLION_00164
7184 EUROPE/train/EUROPE_00978
7184 PROBLEMS/train/PROBLEMS_00090
7184 LEGAL/train/LEGAL_00070
7184 GIVEN/train/GIVEN_00304
7184 PARTS/train/PARTS_00074
7184 SIGNIFICANT/train/SIGNIFICANT_00553
7184 COMES/test/COMES_00004
7184 BUSINESSES/train/BUSINESSES_00429
7184 EXPECT/train/EXPECT_00109
7184 AGAIN/train/AGAIN_00022
7184 POLITICIANS/train/POLITICIANS_00387
7184 WORLD/train/WORLD_00910
7184 OBAMA/train/OBAMA_00428
7184 CALLED/train/CALLED_00802
7184 TALKING/train/TALKING_00393
7184 FIGURES/train/FIGURES_00338
7184 DEATH/val/DEATH_00002
7184 SEVERAL/train/SEVERAL_00860
7184 CHARGES/train/CHARGES_00870
7184 LATER/train/LATER_00347
7184 TAKING/train/TAKING_00918
7184 NUMBER/train/NUMBER_00652
7184 MINUTES/train/MINUTES_00289
7184 MURDER/train/MURDER_00884
7184 GETTING/train/GETTING_00805
7184 RESPONSE/train/RESPONSE_00286
7184 BRITAIN/train/BRITAIN_00827
7184 LONDON/train/LONDON_00772
7184 SOMEONE/train/SOMEONE_00258
7184 ARRESTED/train/ARRESTED_00221
7184 BECOME/train/BECOME_00003
7184 INCREASE/test/INCREASE_00001
7184 WORST/train/WORST_00123
7184 AFFAIRS/train/AFFAIRS_00710
7184 EMERGENCY/test/EMERGENCY_00022
7184 HOMES/test/HOMES_00025
7184 PARENTS/train/PARENTS_00728
7184 WELCOME/val/WELCOME_00021
7184 MONTH/train/MONTH_00315
7184 KNOWN/val/KNOWN_00002
7184 CONCERNS/train/CONCERNS_00130
7184 PEOPLE/train/PEOPLE_00397
7184 BLACK/train/BLACK_00708
7184 YESTERDAY/train/YESTERDAY_00502
7184 PLACE/val/PLACE_00020
7184 TRADE/train/TRADE_00285
7184 ISLAMIC/val/ISLAMIC_00050
7184 PATIENTS/train/PATIENTS_00503
7184 DURING/train/DURING_00794
7184 SERVICES/train/SERVICES_00701
7184 STAND/train/STAND_00460
7184 PLANS/train/PLANS_00931
7184 TALKING/train/TALKING_00874
7184 BEING/train/BEING_00661
7184 RECORD/train/RECORD_00348
7184 STATES/train/STATES_00326
7184 MONEY/train/MONEY_00755
7184 AFFAIRS/train/AFFAIRS_00687
7184 MAKING/val/MAKING_00022
7184 HOUSE/train/HOUSE_00136
7184 CRIME/train/CRIME_00290
7184 SYRIAN/train/SYRIAN_00428
7184 STAND/train/STAND_00442
7184 HEAVY/train/HEAVY_00919
7184 AGREEMENT/train/AGREEMENT_00191
7184 CURRENT/train/CURRENT_00670
7184 BRITISH/train/BRITISH_00849
7184 VIOLENCE/train/VIOLENCE_00773
7184 HEALTH/train/HEALTH_00943
7184 WALES/train/WALES_00374
7184 STORY/train/STORY_00573
7184 SAYING/train/SAYING_00548
7184 AFTERNOON/val/AFTERNOON_00002
7184 PARENTS/train/PARENTS_00554
7184 AREAS/test/AREAS_00036
7184 REPORTS/train/REPORTS_00483
7184 ACCORDING/test/ACCORDING_00020
7184 WOMEN/train/WOMEN_00700
7184 CHILDREN/train/CHILDREN_00731
7184 SUNDAY/train/SUNDAY_00001
7184 LONGER/train/LONGER_00308
7184 CHARGES/train/CHARGES_00527
7184 ENGLAND/train/ENGLAND_00557
7184 FORCES/val/FORCES_00038
7184 GREECE/train/GREECE_00958
7184 INDEPENDENT/train/INDEPENDENT_00120
7184 ISSUES/train/ISSUES_00538
7184 ACCORDING/train/ACCORDING_00101
7184 PARTY/train/PARTY_00040
7184 DURING/train/DURING_00111
7184 MEASURES/val/MEASURES_00007
7184 DURING/train/DURING_00395
7184 MINISTER/train/MINISTER_00465
7184 LOCAL/train/LOCAL_00930
7184 SINCE/train/SINCE_00573
7184 SERIES/val/SERIES_00020
7184 MORNING/train/MORNING_00545
7184 LONGER/train/LONGER_00532
7184 KNOWN/train/KNOWN_00318
7184 MINUTES/train/MINUTES_00398
7184 INTEREST/train/INTEREST_00143
7184 WEEKEND/train/WEEKEND_00575
7184 UNITED/train/UNITED_00914
7184 ACCUSED/train/ACCUSED_00900
7184 CONSERVATIVE/test/CONSERVATIVE_00005
7184 CONFERENCE/train/CONFERENCE_00315
7184 ACTION/train/ACTION_00079
7184 NUMBER/train/NUMBER_00664
7184 ACCORDING/train/ACCORDING_00169
7184 MINUTES/train/MINUTES_00810
7184 AREAS/train/AREAS_00930
7184 LATER/train/LATER_00189
7184 INDUSTRY/train/INDUSTRY_00621
7184 WATER/train/WATER_00052
7184 MURDER/train/MURDER_00988
7184 TALKS/val/TALKS_00037
7184 UNION/train/UNION_00595
7184 TOMORROW/train/TOMORROW_00331
7184 THREE/val/THREE_00044
7184 INFORMATION/val/INFORMATION_00012
7184 SERIES/train/SERIES_00745
7184 MEDICAL/val/MEDICAL_00033
7184 PRIME/train/PRIME_00764
7184 SERVICES/train/SERVICES_00209
7184 SYSTEM/val/SYSTEM_00021
7184 SENIOR/train/SENIOR_00337
7184 OPERATION/train/OPERATION_00242
7184 ACCORDING/train/ACCORDING_00147
7184 DESCRIBED/train/DESCRIBED_00606
7184 HOSPITAL/train/HOSPITAL_00260
7184 SPECIAL/train/SPECIAL_00956
7184 SERIOUS/train/SERIOUS_00998
7184 CHINA/train/CHINA_00472
7184 STAND/train/STAND_00591
7184 LATER/train/LATER_00796
7184 TAKING/train/TAKING_00285
7184 DURING/train/DURING_00978
7184 UNITED/train/UNITED_00594
7184 PRESS/train/PRESS_00045
7184 COMPANY/train/COMPANY_00762
7184 MILITARY/train/MILITARY_00922
7184 LEADERSHIP/train/LEADERSHIP_00631
7184 INDEPENDENT/train/INDEPENDENT_00647
7184 INDUSTRY/train/INDUSTRY_00977
7184 CASES/train/CASES_00431
7184 HAPPENED/val/HAPPENED_00029
7184 FOCUS/train/FOCUS_00441
7184 INVOLVED/train/INVOLVED_00258
7184 WALES/train/WALES_00751
7184 MONTH/train/MONTH_00557
7184 LEADERS/val/LEADERS_00022
7184 WESTMINSTER/train/WESTMINSTER_00598
7184 HEALTH/train/HEALTH_00509
7184 GROUP/val/GROUP_00003
7184 WORDS/test/WORDS_00023
7184 MINUTES/train/MINUTES_00648
7184 LEAVE/train/LEAVE_00829
7184 MINISTERS/test/MINISTERS_00016
7184 WARNING/train/WARNING_00169
7184 EXPECTED/train/EXPECTED_00389
7184 FRANCE/train/FRANCE_00377
7184 SIGNIFICANT/val/SIGNIFICANT_00024
7184 CRIME/train/CRIME_00977
7184 ACCORDING/train/ACCORDING_00313
7184 BIGGEST/train/BIGGEST_00120
7184 ACCORDING/train/ACCORDING_00732
7184 SPECIAL/train/SPECIAL_00236
7184 SERVICE/train/SERVICE_00772
7184 WORKERS/train/WORKERS_00011
7184 SECURITY/train/SECURITY_00762
7184 WEAPONS/test/WEAPONS_00024
7184 LEAST/train/LEAST_00395
7184 CRIME/train/CRIME_00784
7184 HUMAN/train/HUMAN_00082
7184 WEATHER/train/WEATHER_00684
7184 LIVES/val/LIVES_00041
7184 VICTIMS/train/VICTIMS_00926
7184 PRIVATE/train/PRIVATE_00757
7184 SPEAKING/test/SPEAKING_00041
7184 EXTRA/train/EXTRA_00348
7184 ASKED/val/ASKED_00044
7184 SOCIAL/train/SOCIAL_00167
7184 DAVID/test/DAVID_00031
7184 COULD/train/COULD_00768
7184 POLICE/train/POLICE_00831
7184 SPEAKING/test/SPEAKING_00049
7184 AFFAIRS/train/AFFAIRS_00497
7184 LATER/train/LATER_00758
7184 PARENTS/train/PARENTS_00310
7184 WITHIN/train/WITHIN_00106
7184 WITHOUT/train/WITHOUT_00887
7184 ALMOST/train/ALMOST_00446
7184 KNOWN/test/KNOWN_00033
7184 SPEAKING/train/SPEAKING_00455
7184 GIVEN/train/GIVEN_00795
7184 AMERICAN/train/AMERICAN_00266
7184 LEADERS/train/LEADERS_00278
7184 CHILDREN/test/CHILDREN_00029
7184 SERVICES/test/SERVICES_00005
7184 AFTERNOON/train/AFTERNOON_00358
7184 PATIENTS/train/PATIENTS_00659
7184 HEALTH/train/HEALTH_00020
7184 CHANGE/train/CHANGE_00063
7184 SERIES/train/SERIES_00405
7184 WALES/test/WALES_00007
7184 SERVICE/train/SERVICE_00361
7184 EMERGENCY/train/EMERGENCY_00561
7184 AFFAIRS/train/AFFAIRS_00262
7184 EVERYBODY/train/EVERYBODY_00461
7184 AMERICA/test/AMERICA_00019
7184 DETAILS/train/DETAILS_00858
7184 CASES/train/CASES_00083
7184 WARNING/train/WARNING_00608
7184 PLACE/train/PLACE_00994
7184 FINAL/train/FINAL_00172
7184 WOMEN/train/WOMEN_00853
7184 WORST/train/WORST_00660
7184 MARKET/val/MARKET_00047
7184 ATTACK/train/ATTACK_00625
7184 SOCIAL/train/SOCIAL_00506
7184 GIVING/train/GIVING_00596
7184 LOOKING/train/LOOKING_00156
7184 ITSELF/train/ITSELF_00753
7184 CRIME/test/CRIME_00005
7184 PATIENTS/val/PATIENTS_00004
7184 PROBLEMS/train/PROBLEMS_00692
7184 ALWAYS/test/ALWAYS_00018
7184 CONTROL/train/CONTROL_00099
7184 SPEECH/train/SPEECH_00254
7184 ALLOW/train/ALLOW_00399
7184 LEAVE/train/LEAVE_00903
7184 WARNING/train/WARNING_00216
7184 SECRETARY/train/SECRETARY_00949
7184 REPORTS/train/REPORTS_00681
7184 FORMER/train/FORMER_00602
7184 TAKEN/train/TAKEN_00314
7184 EVENTS/train/EVENTS_00521
7184 MEDICAL/test/MEDICAL_00029
7184 ENGLAND/train/ENGLAND_00745
7184 SPECIAL/train/SPECIAL_00060
7184 THESE/train/THESE_00993
7184 AMERICA/train/AMERICA_00417
7184 MAJOR/train/MAJOR_00796
7184 ABOUT/test/ABOUT_00029
7184 LATEST/train/LATEST_00067
7184 STAGE/train/STAGE_00408
7184 SPENT/train/SPENT_00073
7184 WOMEN/train/WOMEN_00974
7184 ALMOST/train/ALMOST_00671
7184 STAND/train/STAND_00904
7184 MAJOR/train/MAJOR_00036
7184 HOUSE/train/HOUSE_00029
7184 EXTRA/train/EXTRA_00512
7184 GAMES/train/GAMES_00181
7184 WARNING/train/WARNING_00150
7184 ACROSS/train/ACROSS_00974
7184 WESTMINSTER/train/WESTMINSTER_00087
7184 SCHOOLS/test/SCHOOLS_00025
7184 LIKELY/train/LIKELY_00508
7184 OTHERS/train/OTHERS_00212
7184 OUTSIDE/train/OUTSIDE_00559
7184 EARLY/train/EARLY_00577
7184 PARLIAMENT/train/PARLIAMENT_00609
7184 INCREASE/test/INCREASE_00027
7184 PLANS/train/PLANS_00430
7184 HOSPITAL/test/HOSPITAL_00028
7184 REFERENDUM/train/REFERENDUM_00752
7184 TOMORROW/train/TOMORROW_00527
7184 PRIME/train/PRIME_00362
7184 CHILDREN/train/CHILDREN_00790
7184 SERVICE/train/SERVICE_00246
7184 VOTERS/train/VOTERS_00273
7184 HEALTH/train/HEALTH_00479
7184 SHOULD/train/SHOULD_00710
7184 MINUTES/train/MINUTES_00207
7184 WESTMINSTER/train/WESTMINSTER_00813
7184 LEADER/val/LEADER_00047
7184 ATTACKS/train/ATTACKS_00628
7184 STATE/val/STATE_00040
7184 PARTY/train/PARTY_00174
7184 INVESTMENT/train/INVESTMENT_00466
7184 COUNCIL/val/COUNCIL_00049
7184 CHANCE/test/CHANCE_00002
7184 INCREASE/train/INCREASE_00365
7184 WEATHER/train/WEATHER_00591
7184 EDITOR/train/EDITOR_00382
7184 ASKED/train/ASKED_00468
7184 LEADER/train/LEADER_00748
7184 COUNCIL/train/COUNCIL_00233
7184 MORNING/train/MORNING_00075
7184 FACING/train/FACING_00189
7184 STAFF/train/STAFF_00889
7184 MILLION/train/MILLION_00035
7184 SAYING/train/SAYING_00828
7184 MILLIONS/test/MILLIONS_00024
7184 ISLAMIC/train/ISLAMIC_00771
7184 FACING/val/FACING_00008
7184 MEASURES/train/MEASURES_00396
7184 FRONT/val/FRONT_00004
7184 DESCRIBED/test/DESCRIBED_00047
7184 MISSING/train/MISSING_00114
7184 HOSPITAL/test/HOSPITAL_00004
7184 FORMER/train/FORMER_00278
7184 MAJORITY/test/MAJORITY_00006
7184 NORTHERN/train/NORTHERN_00944
7184 AFRICA/train/AFRICA_00255
7184 LATEST/train/LATEST_00750
7184 CLAIMS/test/CLAIMS_00044
7184 FORMER/val/FORMER_00049
7184 SCOTTISH/test/SCOTTISH_00024
7184 TRYING/train/TRYING_00471
7184 OPERATION/train/OPERATION_00630
7184 BENEFIT/train/BENEFIT_00613
7184 OFFICE/train/OFFICE_00698
7184 DECISION/train/DECISION_00521
7184 ARRESTED/train/ARRESTED_00980
7184 ALMOST/train/ALMOST_00026
7184 FOREIGN/train/FOREIGN_00149
7184 BIGGEST/train/BIGGEST_00246
7184 UNION/train/UNION_00411
7184 LATEST/train/LATEST_00801
7184 NOTHING/train/NOTHING_00126
7184 MORNING/test/MORNING_00033
7184 POLITICIANS/train/POLITICIANS_00237
7184 ACCORDING/train/ACCORDING_00084
7184 USING/train/USING_00867
7184 ATTACK/val/ATTACK_00049
7184 COMPANY/val/COMPANY_00002
7184 YOUNG/train/YOUNG_00054
7184 CHILD/train/CHILD_00343
7184 RESPONSE/train/RESPONSE_00519
7184 PHONE/train/PHONE_00389
7184 EARLY/train/EARLY_00269
7184 QUESTION/train/QUESTION_00507
7184 SCOTTISH/train/SCOTTISH_00146
7184 WELFARE/train/WELFARE_00762
7184 JAMES/val/JAMES_00018
7184 ATTACK/test/ATTACK_00002
7184 WATCHING/train/WATCHING_00294
7184 ENOUGH/train/ENOUGH_00437
7184 SHOULD/train/SHOULD_00008
7184 SERVICES/train/SERVICES_00661
7184 SENIOR/train/SENIOR_00485
7184 RECENT/train/RECENT_00497
7184 SERIES/train/SERIES_00640
7184 CHILDREN/train/CHILDREN_00668
7184 LIVING/train/LIVING_00771
7184 PRESSURE/train/PRESSURE_00462
7184 PARTS/train/PARTS_00896
7184 EMERGENCY/train/EMERGENCY_00222
7184 PATIENTS/train/PATIENTS_00022
7184 EXPECTED/train/EXPECTED_00769
7184 BRITISH/train/BRITISH_00491
7184 GROWING/train/GROWING_00896
7184 LABOUR/train/LABOUR_00723
7184 ALREADY/test/ALREADY_00007
7184 EASTERN/train/EASTERN_00894
7184 SCHOOLS/val/SCHOOLS_00027
7184 SECURITY/train/SECURITY_00374
7184 BUSINESS/train/BUSINESS_00180
7184 FAMILIES/test/FAMILIES_00034
7184 GEORGE/train/GEORGE_00485
7184 MONTHS/train/MONTHS_00214
7184 THOSE/train/THOSE_00648
7184 PHONE/train/PHONE_00374
7184 DESPITE/test/DESPITE_00009
7184 PARENTS/train/PARENTS_00423
7184 ALLOW/train/ALLOW_00330
7184 RETURN/train/RETURN_00742
7184 RATES/train/RATES_00946
7184 HOUSE/train/HOUSE_00083
7184 BLACK/train/BLACK_00421
7184 LITTLE/train/LITTLE_00662
7184 ACCUSED/train/ACCUSED_00014
7184 EVIDENCE/train/EVIDENCE_00762
7184 LATER/train/LATER_00440
7184 ALLOW/train/ALLOW_00158
7184 OBAMA/train/OBAMA_00370
7184 SECRETARY/val/SECRETARY_00048
7184 WEATHER/train/WEATHER_00234
7184 FRENCH/val/FRENCH_00007
7184 RESULT/train/RESULT_00391
7184 GREECE/train/GREECE_00682
7184 MORNING/val/MORNING_00007
7184 BENEFIT/train/BENEFIT_00127
7184 CHILD/train/CHILD_00949
7184 ENERGY/train/ENERGY_00734
7184 OPPOSITION/train/OPPOSITION_00807
7184 JUSTICE/val/JUSTICE_00036
7184 WEATHER/train/WEATHER_00475
7184 FOCUS/train/FOCUS_00803
7184 WAITING/train/WAITING_00738
7184 MAJORITY/train/MAJORITY_00141
7184 ANOTHER/train/ANOTHER_00155
7184 HEALTH/train/HEALTH_00869
7184 STORY/train/STORY_00022
7184 WESTMINSTER/train/WESTMINSTER_00691
7184 SEVERAL/train/SEVERAL_00580
7184 MESSAGE/train/MESSAGE_00167
7184 SOUTHERN/train/SOUTHERN_00224
7184 ALREADY/train/ALREADY_00574
7184 PATIENTS/train/PATIENTS_00623
7184 JUDGE/train/JUDGE_00355
7184 LEVELS/val/LEVELS_00048
7184 REPORTS/train/REPORTS_00631
7184 REPORTS/train/REPORTS_00425
7184 GIVEN/train/GIVEN_00069
7184 UNDER/train/UNDER_00859
7184 QUESTIONS/train/QUESTIONS_00936
7184 HEALTH/train/HEALTH_00132
7184 LIVING/test/LIVING_00035
7184 SECURITY/train/SECURITY_00312
7184 STREET/train/STREET_00325
7184 RESPONSE/train/RESPONSE_00950
7184 WEATHER/train/WEATHER_00356
7184 BRITAIN/train/BRITAIN_00164
7184 HOURS/train/HOURS_00240
7184 IRELAND/train/IRELAND_00262
7184 SECRETARY/train/SECRETARY_00962
7184 ACCORDING/test/ACCORDING_00009
7184 TIMES/train/TIMES_00617
7184 MISSING/train/MISSING_00362
7184 MORNING/train/MORNING_00304
7184 SECOND/train/SECOND_00667
7184 BETWEEN/train/BETWEEN_00446
7184 FIGHTING/val/FIGHTING_00047
7184 QUESTIONS/test/QUESTIONS_00011
7184 AMERICA/train/AMERICA_00460
7184 CHANGES/train/CHANGES_00453
7184 LABOUR/test/LABOUR_00009
7184 UNDER/train/UNDER_00016
7184 UNDER/train/UNDER_00737
7184 DURING/train/DURING_00073
7184 CHILD/train/CHILD_00682
7184 REPORT/train/REPORT_00705
7184 COULD/test/COULD_00030
7184 MISSING/train/MISSING_00832
7184 WALES/train/WALES_00319
7184 KILLED/val/KILLED_00048
7184 MINUTES/train/MINUTES_00287
7184 EDUCATION/train/EDUCATION_00283
7184 WARNING/train/WARNING_00108
7184 WESTMINSTER/train/WESTMINSTER_00359
7184 WEEKS/train/WEEKS_00248
7184 STAGE/test/STAGE_00021
7184 RUNNING/train/RUNNING_00840
7184 LEAVE/train/LEAVE_00543
7184 MISSING/val/MISSING_00003
7184 PRISON/train/PRISON_00104
7184 STAFF/train/STAFF_00046
7184 OFTEN/train/OFTEN_00062
7184 PLACES/train/PLACES_00670
7184 VOTERS/test/VOTERS_00022
7184 GROWING/val/GROWING_00015
7184 TALKS/train/TALKS_00504
7184 LATER/train/LATER_00191
7184 SINCE/train/SINCE_00529
7184 INDUSTRY/train/INDUSTRY_00142
7184 ARRESTED/train/ARRESTED_00401
7184 MASSIVE/val/MASSIVE_00002
7184 WITHOUT/train/WITHOUT_00263
7184 STORY/train/STORY_00425
7184 PROBLEMS/train/PROBLEMS_00152
7184 PARLIAMENT/train/PARLIAMENT_00477
7184 ENGLAND/train/ENGLAND_01000
7184 MURDER/train/MURDER_00317
7184 ASKED/train/ASKED_00746
7184 PHONE/train/PHONE_00924
7184 EXPECTED/test/EXPECTED_00020
7184 PLACE/train/PLACE_00868
7184 DEBATE/train/DEBATE_00713
7184 SINCE/train/SINCE_00956
7184 STORY/train/STORY_00301
7184 WANTED/train/WANTED_00132
7184 UNDER/train/UNDER_00645
7184 FIRST/train/FIRST_00982
7184 REPORTS/train/REPORTS_00554
7184 MILLIONS/train/MILLIONS_00813
7184 COMPANY/train/COMPANY_00769
7184 YESTERDAY/train/YESTERDAY_00408
7184 REPORTS/val/REPORTS_00009
7184 BUILDING/train/BUILDING_00075
7184 FIRST/train/FIRST_00862
7184 HOSPITAL/train/HOSPITAL_00665
7184 AMOUNT/train/AMOUNT_00578
7184 PUBLIC/test/PUBLIC_00025
7184 AGAINST/train/AGAINST_00426
7184 WANTS/train/WANTS_00577
7184 WARNING/train/WARNING_00830
7184 MINISTER/train/MINISTER_00410
7184 INVESTMENT/train/INVESTMENT_00749
7184 COMPANY/train/COMPANY_00054
7184 WITHIN/train/WITHIN_00364
7184 SEVEN/train/SEVEN_00408
7184 SOUTHERN/train/SOUTHERN_00526
7184 CHALLENGE/val/CHALLENGE_00042
7184 CLAIMS/train/CLAIMS_00299
7184 LONDON/train/LONDON_00827
7184 REPORTS/train/REPORTS_00608
7184 BEHIND/train/BEHIND_00659
7184 IRELAND/train/IRELAND_00523
7184 THOUGHT/train/THOUGHT_00908
7184 LEADER/train/LEADER_00323
7184 SOCIAL/train/SOCIAL_00372
7184 DECIDED/train/DECIDED_00505
7184 PATIENTS/train/PATIENTS_00591
7184 PRESIDENT/train/PRESIDENT_00825
7184 MILITARY/train/MILITARY_00094
7184 WORST/val/WORST_00031
7184 CLAIMS/train/CLAIMS_00262
7184 RUSSIA/train/RUSSIA_00164
7184 MILLIONS/train/MILLIONS_00187
7184 EMERGENCY/train/EMERGENCY_00456
7184 PRESIDENT/train/PRESIDENT_00942
7184 WOMEN/train/WOMEN_00236
7184 GIVEN/train/GIVEN_00489
7184 THERE/train/THERE_00612
7184 STAND/train/STAND_00664
7184 PROBLEMS/test/PROBLEMS_00013
7184 TALKING/val/TALKING_00024
7184 MISSING/train/MISSING_00287
7184 EVERY/train/EVERY_00871
7184 CHIEF/train/CHIEF_00478
7184 PARTS/train/PARTS_00810
7184 EDUCATION/train/EDUCATION_00090
7184 FOLLOWING/train/FOLLOWING_00309
7184 FORMER/train/FORMER_00593
7184 CRISIS/train/CRISIS_00364
9335 INVESTMENT/train/INVESTMENT_00700
9335 ABOUT/train/ABOUT_00934
9335 EVIDENCE/train/EVIDENCE_00299
9335 PRIVATE/train/PRIVATE_00389
9335 ANSWER/train/ANSWER_00606
9335 HEALTH/train/HEALTH_00928
9335 SPENDING/train/SPENDING_00540
9335 THREAT/train/THREAT_00232
9335 HEALTH/train/HEALTH_00933
9335 LIKELY/train/LIKELY_00694
9335 HOSPITAL/train/HOSPITAL_00672
9335 CAPITAL/train/CAPITAL_00656
9335 BANKS/train/BANKS_00051
9335 QUESTION/train/QUESTION_00151
9335 COMMUNITY/train/COMMUNITY_00304
9335 OTHERS/val/OTHERS_00047
9335 SAYING/train/SAYING_00877
9335 DEFICIT/train/DEFICIT_00693
9335 CONTINUE/train/CONTINUE_00454
9335 THIRD/val/THIRD_00041
9335 RATES/train/RATES_00536
9335 LEVEL/train/LEVEL_00885
9335 DOING/train/DOING_00894
9335 INTEREST/train/INTEREST_00391
9335 MONTHS/train/MONTHS_00947
9335 MILLION/train/MILLION_00098
9335 INCREASE/train/INCREASE_00480
9335 PROCESS/train/PROCESS_00720
9335 PLANS/train/PLANS_00213
9335 LEVELS/train/LEVELS_00974
9335 HOSPITAL/train/HOSPITAL_00710
9335 SEEMS/val/SEEMS_00012
9335 RECENT/test/RECENT_00049
9335 FORWARD/train/FORWARD_00461
9335 RESPONSE/train/RESPONSE_00402
9335 WEEKS/train/WEEKS_00246
9335 EXTRA/train/EXTRA_00324
9335 ECONOMIC/train/ECONOMIC_00219
9335 OFFICE/train/OFFICE_00986
9335 MEDIA/train/MEDIA_00901
9335 BETWEEN/train/BETWEEN_00387
9335 INFLATION/train/INFLATION_00616
9335 ANSWER/train/ANSWER_00458
9335 WATER/train/WATER_00461
9335 AFFECTED/train/AFFECTED_00269
9335 UNTIL/train/UNTIL_00771
9335 GREECE/train/GREECE_00959
9335 LOOKING/train/LOOKING_00404
9335 HAPPENING/train/HAPPENING_00962
9335 GROWING/train/GROWING_00555
9335 CONTINUE/train/CONTINUE_00240
9335 RUNNING/train/RUNNING_00413
9335 SHOULD/train/SHOULD_00745
9335 RUNNING/train/RUNNING_00004
9335 SIMPLY/train/SIMPLY_00553
9335 BENEFITS/train/BENEFITS_00286
9335 GROWTH/train/GROWTH_00109
9335 WELCOME/train/WELCOME_00280
9335 ACCORDING/test/ACCORDING_00005
9335 LONDON/train/LONDON_00735
9335 INFORMATION/train/INFORMATION_00846
9335 AMOUNT/train/AMOUNT_00391
9335 STATEMENT/train/STATEMENT_00873
9335 LOOKING/train/LOOKING_00775
9335 BANKS/train/BANKS_00662
9335 BUSINESSES/train/BUSINESSES_00298
9335 UNION/train/UNION_00278
9335 PROBLEMS/train/PROBLEMS_00892
9335 CAMERON/train/CAMERON_00156
9335 ACCESS/train/ACCESS_00901
9335 CERTAINLY/train/CERTAINLY_00361
9335 STAGE/train/STAGE_00805
9335 THERE/test/THERE_00008
9335 PRIVATE/train/PRIVATE_00737
9335 CONCERNS/test/CONCERNS_00050
9335 DIFFICULT/train/DIFFICULT_00272
9335 LONDON/train/LONDON_00471
9335 PERIOD/train/PERIOD_00293
9335 ANOTHER/train/ANOTHER_00230
9335 PRESSURE/train/PRESSURE_00031
9335 FIRST/train/FIRST_00858
9335 STAND/train/STAND_00923
9335 GREECE/train/GREECE_00008
9335 ACCESS/train/ACCESS_00088
9335 PERSONAL/train/PERSONAL_00741
9335 WORKERS/train/WORKERS_00127
9335 CHANGE/train/CHANGE_00612
9335 GREECE/train/GREECE_00690
9335 RATES/train/RATES_00649
9335 MINUTES/train/MINUTES_00657
9335 KNOWN/train/KNOWN_00527
9335 MAKING/train/MAKING_00363
9335 HOURS/test/HOURS_00001
9335 CONTROL/train/CONTROL_00225
9335 INTEREST/train/INTEREST_00565
9335 PUBLIC/train/PUBLIC_00607
9335 EXTRA/train/EXTRA_00791
9335 EXAMPLE/val/EXAMPLE_00030
9335 ACCUSED/train/ACCUSED_00638
9335 GIVING/train/GIVING_00285
9335 POINT/train/POINT_00450
9335 GLOBAL/train/GLOBAL_00146
9335 MIDDLE/train/MIDDLE_00115
9335 COULD/test/COULD_00021
9335 SECOND/train/SECOND_00950
9335 TRYING/train/TRYING_00381
9335 MONTHS/train/MONTHS_00509
9335 MESSAGE/train/MESSAGE_00936
9335 ALLOWED/train/ALLOWED_00257
9335 STARTED/train/STARTED_00418
9335 CHALLENGE/train/CHALLENGE_00039
9335 FRENCH/train/FRENCH_00748
9335 ANYTHING/train/ANYTHING_00996
9335 ALWAYS/train/ALWAYS_00366
9335 SECTOR/train/SECTOR_00751
9335 SECTOR/train/SECTOR_00516
9335 NEVER/train/NEVER_00646
9335 MATTER/train/MATTER_00385
9335 FORWARD/train/FORWARD_00628
9335 QUESTIONS/train/QUESTIONS_00255
9335 SCOTTISH/train/SCOTTISH_00715
9335 CENTRAL/train/CENTRAL_00587
9335 WOULD/train/WOULD_00992
9335 AMOUNT/train/AMOUNT_00639
9335 CENTRAL/train/CENTRAL_00073
9335 EMERGENCY/train/EMERGENCY_00313
9335 CHANGE/train/CHANGE_00048
9335 COUNTRIES/train/COUNTRIES_00539
9335 SPEECH/train/SPEECH_00058
9335 ASKED/train/ASKED_00033
9335 POLICY/train/POLICY_00409
9335 WORST/train/WORST_00770
9335 WHETHER/train/WHETHER_00025
9335 UNTIL/train/UNTIL_00805
9335 RATHER/train/RATHER_00012
9335 STAFF/train/STAFF_00634
9335 WITHOUT/train/WITHOUT_00874
9335 TEMPERATURES/train/TEMPERATURES_00729
9335 COUPLE/train/COUPLE_00317
9335 GROWTH/train/GROWTH_00711
9335 BUDGET/train/BUDGET_00893
9335 FIRST/train/FIRST_00043
9335 OTHER/train/OTHER_00394
9335 HOSPITAL/train/HOSPITAL_00977
9335 FRENCH/train/FRENCH_00703
9335 WORDS/train/WORDS_00029
9335 MAYBE/train/MAYBE_00627
9335 SECTOR/train/SECTOR_00768
9335 FINANCIAL/train/FINANCIAL_00651
9335 MONTH/train/MONTH_00721
9335 QUESTIONS/train/QUESTIONS_00804
9335 GROWTH/train/GROWTH_00963
9335 INTEREST/train/INTEREST_00628
9335 SPEAKING/train/SPEAKING_00566
9335 BUSINESSES/train/BUSINESSES_00251
9335 RATES/train/RATES_00024
9335 FIGURES/train/FIGURES_00070
9335 CUSTOMERS/train/CUSTOMERS_00084
9335 GREECE/train/GREECE_00981
9335 AMERICAN/train/AMERICAN_00355
9335 AGREE/train/AGREE_00534
9335 MONEY/train/MONEY_00578
9335 LEVEL/train/LEVEL_00122
9335 INTEREST/train/INTEREST_00948
9335 SECTOR/train/SECTOR_00689
9335 CENTRAL/train/CENTRAL_00350
9335 RULES/train/RULES_00169
9335 WHOLE/train/WHOLE_00542
9335 MAJOR/train/MAJOR_00505
9335 MEETING/train/MEETING_00026
9335 GROWTH/train/GROWTH_00740
9335 GEORGE/train/GEORGE_00881
9335 ALWAYS/train/ALWAYS_00947
9335 SAYING/train/SAYING_00241
9335 PRIVATE/train/PRIVATE_00364
9335 AUTHORITIES/train/AUTHORITIES_00527
9335 WOULD/train/WOULD_00949
9335 REPORT/train/REPORT_00416
9335 OTHER/train/OTHER_00972
9335 STILL/train/STILL_00474
9335 PUBLIC/train/PUBLIC_00503
9335 MONEY/train/MONEY_00356
9335 EARLY/train/EARLY_00888
9335 GREECE/train/GREECE_00581
9335 ALREADY/train/ALREADY_00402
9335 INDUSTRY/train/INDUSTRY_00473
9335 INFLATION/train/INFLATION_00399
9335 MONTH/train/MONTH_00955
9335 FURTHER/train/FURTHER_00339
9335 SEVEN/train/SEVEN_00145
9335 SECTOR/train/SECTOR_00315
9335 FRANCE/train/FRANCE_00393
9335 CLEAR/train/CLEAR_00194
9335 FIGURES/train/FIGURES_00409
9335 COUPLE/train/COUPLE_00204
9335 BUSINESSES/train/BUSINESSES_00106
9335 ITSELF/train/ITSELF_00485
9335 POLICY/train/POLICY_00676
9335 PROBLEM/train/PROBLEM_00988
9335 STATEMENT/train/STATEMENT_00339
9335 STAFF/train/STAFF_00565
9335 AGAIN/train/AGAIN_00530
9335 SAYING/train/SAYING_00032
9335 RUNNING/train/RUNNING_00537
9335 FURTHER/train/FURTHER_00348
9335 FINAL/train/FINAL_00646
9335 CUSTOMERS/train/CUSTOMERS_00659
9335 EMERGENCY/train/EMERGENCY_00441
9335 HIGHER/train/HIGHER_00519
9335 OPERATION/train/OPERATION_00061
9335 NEEDS/train/NEEDS_00696
9335 SECTOR/train/SECTOR_00861
9335 EVERYTHING/train/EVERYTHING_00541
9335 EXTRA/train/EXTRA_00617
9335 LOCAL/val/LOCAL_00046
9335 GROWTH/train/GROWTH_00852
9335 GOVERNMENT/train/GOVERNMENT_00432
9335 PARLIAMENT/train/PARLIAMENT_00854
9335 SIGNIFICANT/test/SIGNIFICANT_00037
9335 INDEPENDENT/train/INDEPENDENT_00195
9335 DEFICIT/train/DEFICIT_00813
9335 MARKET/train/MARKET_00274
9335 PRICES/train/PRICES_00534
9335 FINANCIAL/train/FINANCIAL_00771
9335 TOWARDS/train/TOWARDS_00735
9335 SPENDING/train/SPENDING_00160
9335 REASON/train/REASON_00567
9335 INFLATION/train/INFLATION_00472
9335 INFLATION/train/INFLATION_00605
9335 MILLIONS/train/MILLIONS_00327
9335 WORKERS/train/WORKERS_00690
9335 RULES/train/RULES_00711
9335 RATES/train/RATES_00169
9335 FIGURES/train/FIGURES_00317
9335 NEEDS/train/NEEDS_00718
9335 FIGURES/train/FIGURES_00062
9335 COUNTRIES/train/COUNTRIES_00238
9335 ALLOWED/train/ALLOWED_00620
9335 CALLED/train/CALLED_00494
9335 SINGLE/train/SINGLE_00279
9335 BUSINESSES/train/BUSINESSES_00345
9335 WANTS/train/WANTS_00975
9335 CHANCE/train/CHANCE_00591
9335 GIVING/train/GIVING_00642
9335 POTENTIAL/train/POTENTIAL_00051
9335 FRANCE/train/FRANCE_00534
9335 POLICY/train/POLICY_00197
9335 WORDS/train/WORDS_00410
9335 MOVING/train/MOVING_00842
9335 SYSTEM/train/SYSTEM_00395
9335 ECONOMY/train/ECONOMY_00115
9335 NEEDS/train/NEEDS_00304
9335 HIGHER/train/HIGHER_00673
9335 FOCUS/train/FOCUS_00067
9335 ACTION/train/ACTION_00403
9335 WELCOME/train/WELCOME_00271
9335 RECENT/train/RECENT_00684
9335 STAGE/train/STAGE_00088
9335 STRONG/train/STRONG_00627
9335 MEASURES/test/MEASURES_00007
9335 MONTH/train/MONTH_00160
9335 SOMETHING/test/SOMETHING_00024
9335 SYSTEM/train/SYSTEM_00505
9335 PERIOD/train/PERIOD_00275
9335 LIVING/train/LIVING_00250
9335 REPORT/train/REPORT_00700
9335 PATIENTS/train/PATIENTS_00107
9335 COMMUNITY/train/COMMUNITY_00904
9335 AHEAD/train/AHEAD_00793
9335 MONTHS/train/MONTHS_00793
9335 SAYING/train/SAYING_00300
9335 MONTH/train/MONTH_00062
9335 DIFFERENT/train/DIFFERENT_00791
9335 REALLY/train/REALLY_00507
9335 GROWTH/train/GROWTH_00452
9335 SYSTEM/train/SYSTEM_00496
9335 GERMANY/train/GERMANY_00110
9335 AFTER/train/AFTER_00343
9335 FOREIGN/train/FOREIGN_00025
9335 COULD/train/COULD_00746
9335 SPEECH/train/SPEECH_00004
9335 HIGHER/train/HIGHER_00768
9335 LIVES/train/LIVES_00962
9335 DETAILS/train/DETAILS_00774
9335 MAJOR/train/MAJOR_00885
9335 RULES/train/RULES_00731
9335 RETURN/train/RETURN_00349
9335 STAGE/train/STAGE_00398
9335 POLITICIANS/train/POLITICIANS_00949
9335 COMING/train/COMING_00750
9335 RECENT/train/RECENT_00050
9335 FIGURES/train/FIGURES_00117
9335 SPEECH/train/SPEECH_00298
9335 SPENDING/train/SPENDING_00434
9335 LONDON/train/LONDON_00661
9335 MOVING/train/MOVING_00336
9335 THERE/train/THERE_00262
9335 PAYING/train/PAYING_00082
9335 NUMBERS/train/NUMBERS_00925
9335 BANKS/train/BANKS_00904
9335 REALLY/train/REALLY_00760
9335 JAMES/train/JAMES_00403
9335 INFLATION/train/INFLATION_00233
9335 AROUND/train/AROUND_00501
9335 MAYBE/train/MAYBE_00576
9335 MEETING/train/MEETING_00175
9335 SPEECH/train/SPEECH_00016
9335 FRANCE/train/FRANCE_00654
9335 WELFARE/train/WELFARE_00758
9335 EXTRA/train/EXTRA_00471
9335 MEDIA/train/MEDIA_00739
9335 DEFICIT/train/DEFICIT_00524
9335 COUPLE/train/COUPLE_00813
9335 OTHER/train/OTHER_00015
9335 FIGURES/train/FIGURES_00170
9335 BENEFITS/train/BENEFITS_00742
9335 COUNCIL/train/COUNCIL_00258
9335 BUSINESSES/train/BUSINESSES_00606
9335 BILLION/train/BILLION_00336
9335 MEASURES/train/MEASURES_00874
9335 PROBLEMS/train/PROBLEMS_00911
9335 HEALTH/train/HEALTH_00315
9335 POLICY/train/POLICY_00358
9335 WORKERS/train/WORKERS_00892
9335 WEEKEND/train/WEEKEND_00736
9335 EUROPE/train/EUROPE_00453
9335 INTEREST/train/INTEREST_00634
9335 RATES/train/RATES_00263
9335 OPERATION/val/OPERATION_00027
9335 INFLATION/train/INFLATION_00700
9335 GROWTH/train/GROWTH_00118
9335 EXTRA/train/EXTRA_00844
9335 GENERAL/train/GENERAL_00511
9335 THESE/train/THESE_00546
9335 PROCESS/train/PROCESS_00402
9335 PROVIDE/train/PROVIDE_00400
9335 ATTACKS/train/ATTACKS_00047
9335 WEEKS/val/WEEKS_00027
9335 BUSINESSES/train/BUSINESSES_00235
9335 RATES/train/RATES_00905
9335 GROWTH/train/GROWTH_00022
9335 IMPORTANT/train/IMPORTANT_00322
9335 RATES/train/RATES_00880
9335 GROWTH/train/GROWTH_00364
9335 BRING/train/BRING_00979
9335 EMERGENCY/train/EMERGENCY_00231
9335 BENEFIT/train/BENEFIT_00579
9335 GROWTH/train/GROWTH_00978
9335 SECTOR/train/SECTOR_00394
9335 PRICE/train/PRICE_00156
9335 BUSINESS/train/BUSINESS_00938
9335 BECAUSE/train/BECAUSE_00682
9335 POSSIBLE/train/POSSIBLE_00057
9335 INDUSTRY/train/INDUSTRY_00774
9335 PARTS/train/PARTS_00457
9335 BANKS/train/BANKS_00378
9335 INTEREST/train/INTEREST_00454
9335 EVIDENCE/train/EVIDENCE_00548
9335 DEFICIT/train/DEFICIT_00747
9335 AMOUNT/train/AMOUNT_00111
9335 POWER/train/POWER_00855
9335 IMPACT/train/IMPACT_00236
9335 EMERGENCY/train/EMERGENCY_00081
9335 SAYING/train/SAYING_00452
9335 GENERAL/train/GENERAL_00014
9335 SIGNIFICANT/train/SIGNIFICANT_00909
9335 POTENTIAL/val/POTENTIAL_00008
9335 SYSTEM/val/SYSTEM_00019
9335 INVOLVED/train/INVOLVED_00234
9335 LOCAL/train/LOCAL_00268
9335 GEORGE/train/GEORGE_00977
9335 LATEST/train/LATEST_00897
9335 INFLATION/train/INFLATION_00195
9335 SENSE/train/SENSE_00031
9335 TOWARDS/train/TOWARDS_00912
9335 DURING/train/DURING_00663
9335 ECONOMY/train/ECONOMY_00678
9335 CENTRAL/train/CENTRAL_00682
9335 HEART/train/HEART_00708
9335 PATIENTS/train/PATIENTS_00740
9335 DIFFERENT/train/DIFFERENT_00082
9335 MEMBERS/train/MEMBERS_00100
9335 POINT/train/POINT_00235
9335 HEALTH/train/HEALTH_00035
9335 GROWTH/train/GROWTH_00264
9335 PROBLEMS/train/PROBLEMS_00727
9335 MEETING/train/MEETING_00174
9335 INTEREST/train/INTEREST_00801
9335 ECONOMIC/train/ECONOMIC_00066
9335 PATIENTS/train/PATIENTS_00139
9335 SECTOR/train/SECTOR_00177
9335 INTEREST/train/INTEREST_00485
9335 RATES/train/RATES_00595
9335 RECORD/train/RECORD_00030
9335 RIGHT/train/RIGHT_00683
9335 EXAMPLE/train/EXAMPLE_00098
9335 RECORD/train/RECORD_00971
9335 POSITION/train/POSITION_00632
9335 ISSUES/train/ISSUES_00104
9335 SHOULD/train/SHOULD_00676
9335 PROVIDE/test/PROVIDE_00041
9335 BETWEEN/train/BETWEEN_00898
9335 YESTERDAY/train/YESTERDAY_00235
9335 EDUCATION/train/EDUCATION_00348
9335 PAYING/train/PAYING_00312
9335 LITTLE/train/LITTLE_00374
9335 BANKS/train/BANKS_00137
9335 SIMPLY/train/SIMPLY_00405
9335 INFLATION/train/INFLATION_00717
9335 RATHER/train/RATHER_00291
9335 HIGHER/train/HIGHER_00444
9335 ACTUALLY/train/ACTUALLY_00491
9335 MARKET/train/MARKET_00055
9335 DURING/train/DURING_00556
9335 GLOBAL/train/GLOBAL_00912
9335 WARNING/train/WARNING_00893
9335 SECTOR/train/SECTOR_00213
9335 PROBLEM/train/PROBLEM_00417
9335 ANYTHING/train/ANYTHING_00670
9335 PATIENTS/train/PATIENTS_00379
9335 GETTING/train/GETTING_00338
9335 EVERYTHING/val/EVERYTHING_00041
9335 MONTHS/train/MONTHS_00791
9335 EMERGENCY/train/EMERGENCY_00327
9335 RECENT/train/RECENT_00603
9335 MAKING/train/MAKING_00704
9335 MAJORITY/train/MAJORITY_00884
9335 INTEREST/train/INTEREST_00152
9335 PROBLEM/train/PROBLEM_00457
9335 ISSUE/train/ISSUE_00578
9335 MONTHS/train/MONTHS_00272
9335 EVENING/train/EVENING_00502
9335 BANKS/train/BANKS_00280
9335 GROWTH/train/GROWTH_00355
9335 MINISTERS/train/MINISTERS_00336
9335 INFLATION/train/INFLATION_00189
9335 FORWARD/train/FORWARD_00877
9335 GROWTH/train/GROWTH_00347
9335 OTHERS/train/OTHERS_00330
9335 POLITICS/train/POLITICS_00206
9335 DIFFICULT/val/DIFFICULT_00036
9335 FACING/train/FACING_00099
9335 BENEFIT/train/BENEFIT_00765
9335 ECONOMIC/train/ECONOMIC_00675
9335 ALREADY/train/ALREADY_00871
9335 SPECIAL/val/SPECIAL_00010
9335 SYSTEM/train/SYSTEM_00508
9335 MOVING/train/MOVING_00468
9335 MEMBER/train/MEMBER_00300
9335 YEARS/train/YEARS_00609
9335 MONTH/train/MONTH_00478
9335 BANKS/train/BANKS_00349
9335 CERTAINLY/train/CERTAINLY_00336
9335 SECTOR/train/SECTOR_00992
9335 INTEREST/train/INTEREST_00577
9335 COURT/test/COURT_00027
9335 LATER/train/LATER_00691
9335 EXPECTED/train/EXPECTED_00864
9335 THREAT/train/THREAT_00822
9335 OFFICIALS/train/OFFICIALS_00732
9335 MESSAGE/train/MESSAGE_00655
9335 MEMBERS/train/MEMBERS_00473
9335 WEEKS/train/WEEKS_00657
9335 FRANCE/train/FRANCE_00352
9335 IRELAND/train/IRELAND_00020
9335 INFLATION/train/INFLATION_00188
9335 MONTHS/train/MONTHS_00550
9335 RUNNING/train/RUNNING_00511
9335 BUSINESSES/train/BUSINESSES_00399
9335 INTEREST/train/INTEREST_00977
9335 AMERICAN/train/AMERICAN_00744
9335 CHANGES/train/CHANGES_00114
9335 ENGLAND/train/ENGLAND_00380
9335 BANKS/train/BANKS_00792
9335 PRIVATE/train/PRIVATE_00327
9335 SERVICE/train/SERVICE_00983
9335 GIVING/train/GIVING_00797
9335 THREAT/train/THREAT_00199
9335 WHETHER/train/WHETHER_00357
9335 USING/train/USING_00096
9335 ECONOMY/train/ECONOMY_00266
9335 SIMPLY/train/SIMPLY_00429
9335 INFLATION/train/INFLATION_00108
9335 PERIOD/train/PERIOD_00822
9335 REASON/train/REASON_00083
9335 GROWTH/train/GROWTH_00471
9335 PATIENTS/train/PATIENTS_00588
9335 BUILDING/train/BUILDING_00582
9335 WARNING/train/WARNING_00132
9335 INFLATION/train/INFLATION_00536
9335 GOVERNMENT/train/GOVERNMENT_00725
9335 EVENTS/train/EVENTS_00748
9335 MONEY/train/MONEY_00369
9335 BUSINESSES/train/BUSINESSES_00511
9335 DEFICIT/train/DEFICIT_00628
9335 RATES/train/RATES_00591
9335 JAMES/train/JAMES_00305
9335 EARLY/train/EARLY_00274
9335 ALMOST/train/ALMOST_00142
9335 HOSPITAL/train/HOSPITAL_00023
9335 THEIR/train/THEIR_00570
9335 SPECIAL/train/SPECIAL_00879
9335 WORKERS/train/WORKERS_00610
9335 MONTH/train/MONTH_00898
9335 NUMBERS/train/NUMBERS_00505
9335 ALMOST/train/ALMOST_00795
9335 POWERS/train/POWERS_00262
9335 FIRST/train/FIRST_00336
9335 STAFF/train/STAFF_00305
9335 MONEY/train/MONEY_00767
9335 BROUGHT/train/BROUGHT_00390
9335 BUSINESSES/train/BUSINESSES_00716
9335 STAFF/train/STAFF_00483
9335 SOUTH/train/SOUTH_00004
9335 OFFICIALS/train/OFFICIALS_00420
9335 AHEAD/train/AHEAD_00209
9335 BIGGEST/train/BIGGEST_00828
9335 NATIONAL/train/NATIONAL_00220
9335 POINT/train/POINT_00242
9335 MASSIVE/train/MASSIVE_00572
9335 COUPLE/test/COUPLE_00011
9335 BUILD/train/BUILD_00119
9335 SAYING/train/SAYING_00364
9335 WORDS/train/WORDS_00790
9335 MAYBE/train/MAYBE_00878
9335 PATIENTS/train/PATIENTS_00939
9335 PROCESS/train/PROCESS_00971
9335 LOCAL/train/LOCAL_00772
9335 CRISIS/train/CRISIS_00907
9335 FINANCIAL/train/FINANCIAL_00718
9335 MEDIA/train/MEDIA_00586
9335 COULD/train/COULD_00760
9335 STREET/train/STREET_00472
9335 STATEMENT/train/STATEMENT_00498
9335 RATHER/val/RATHER_00011
9335 ACROSS/train/ACROSS_00537
9335 YESTERDAY/train/YESTERDAY_00246
9335 BELIEVE/train/BELIEVE_00641
9335 CHANGES/train/CHANGES_00815
9335 ANSWER/train/ANSWER_00902
9335 FINANCIAL/train/FINANCIAL_00128
9335 QUITE/train/QUITE_00397
9335 GETTING/train/GETTING_00739
9335 EUROPE/train/EUROPE_00766
9335 GROWTH/train/GROWTH_00397
9335 MAJOR/train/MAJOR_00544
9335 TOMORROW/train/TOMORROW_00640
9335 SEVERAL/train/SEVERAL_00298
9335 FRANCE/train/FRANCE_00464
9335 MONTHS/train/MONTHS_00513
9335 OUTSIDE/train/OUTSIDE_00430
9335 WORLD/train/WORLD_00790
9335 HIGHER/train/HIGHER_00017
9335 OFFICIALS/train/OFFICIALS_00026
9335 TRYING/train/TRYING_00532
9335 HAPPENED/train/HAPPENED_00695
9335 BILLION/train/BILLION_00878
9335 CRISIS/train/CRISIS_00974
9335 LEADERSHIP/train/LEADERSHIP_00044
9335 RECENT/train/RECENT_00872
9335 NOTHING/train/NOTHING_00346
9335 BUSINESSES/train/BUSINESSES_00799
9335 LIKELY/train/LIKELY_00387
9335 BUILD/train/BUILD_00675
9335 HAPPENED/train/HAPPENED_00985
9335 GREAT/train/GREAT_00891
9335 COMPANY/train/COMPANY_00393
9335 PROBABLY/train/PROBABLY_00208
9335 LONDON/train/LONDON_00405
9335 EVIDENCE/train/EVIDENCE_00009
9335 WORKERS/train/WORKERS_00265
9335 MONEY/train/MONEY_00664
9335 QUESTION/train/QUESTION_00253
9335 TALKS/train/TALKS_00647
9335 GREECE/train/GREECE_00301
9335 EXTRA/train/EXTRA_00122
9335 CRISIS/train/CRISIS_00329
9335 GIVEN/test/GIVEN_00021
9335 MEETING/train/MEETING_00516
9335 RIGHTS/train/RIGHTS_00172
9335 LITTLE/train/LITTLE_00594
9335 PROBABLY/train/PROBABLY_00580
9335 ENOUGH/train/ENOUGH_00184
9335 GLOBAL/train/GLOBAL_00741
9335 CURRENT/train/CURRENT_00350
9335 GOING/train/GOING_00796
9335 PLACE/train/PLACE_00241
9335 GROWTH/train/GROWTH_00216
9335 AFFECTED/train/AFFECTED_00612
9335 INTEREST/train/INTEREST_00438
9335 PRETTY/train/PRETTY_00845
9335 RUNNING/train/RUNNING_00787
9335 HIGHER/train/HIGHER_00613
9335 COUNTRY/train/COUNTRY_00431
9335 REMEMBER/train/REMEMBER_00682
9335 ABSOLUTELY/train/ABSOLUTELY_00910
9335 THERE/train/THERE_00869
9335 EARLY/train/EARLY_00687
9335 PRICES/train/PRICES_00003
9335 BUDGET/train/BUDGET_00210
9335 LEAST/train/LEAST_00096
9335 COURSE/train/COURSE_00921
9335 ISSUE/train/ISSUE_00477
9335 EXAMPLE/train/EXAMPLE_00863
9335 HAPPENED/train/HAPPENED_00006
9335 DAVID/train/DAVID_00862
9335 WORKING/train/WORKING_00855
9335 ANSWER/train/ANSWER_00664
9335 MEASURES/train/MEASURES_00056
9335 BUSINESSES/train/BUSINESSES_00035
9335 SHORT/train/SHORT_00948
9335 CASES/train/CASES_00479
9335 SPENDING/train/SPENDING_00536
9335 PRICE/train/PRICE_00196
9335 GERMANY/train/GERMANY_00333
9335 PAYING/train/PAYING_00493
9335 NUMBERS/train/NUMBERS_00496
9335 FOCUS/train/FOCUS_00387
9335 LABOUR/train/LABOUR_00251
9335 SOMEONE/train/SOMEONE_00915
9335 TRADE/train/TRADE_00085
9335 INVESTMENT/train/INVESTMENT_00226
9335 CLEAR/train/CLEAR_00730
9335 CRISIS/train/CRISIS_00726
9335 GERMANY/train/GERMANY_00253
9335 FINANCIAL/train/FINANCIAL_00937
9335 NUMBERS/train/NUMBERS_00407
9335 PROBABLY/train/PROBABLY_00022
9335 SEEMS/train/SEEMS_00199
9335 HOSPITAL/train/HOSPITAL_00129
9335 INFLATION/train/INFLATION_00471
9335 PAYING/train/PAYING_00782
9335 SPEND/train/SPEND_00311
9335 SENSE/train/SENSE_00953
9335 GIVEN/val/GIVEN_00024
9335 WEEKS/train/WEEKS_00978
9335 POSITION/train/POSITION_00850
9335 CHALLENGE/train/CHALLENGE_00204
9335 CRISIS/train/CRISIS_00909
9335 COMPANIES/train/COMPANIES_00478
9335 PROVIDE/train/PROVIDE_00157
9335 BRING/train/BRING_00158
9335 GROWTH/train/GROWTH_00988
9335 STRONG/train/STRONG_00171
9335 HEALTH/train/HEALTH_00653
9335 BUSINESSES/train/BUSINESSES_00236
9335 FINAL/train/FINAL_00964
9335 PROBLEMS/train/PROBLEMS_00523
9335 LATEST/train/LATEST_00854
9335 EXACTLY/train/EXACTLY_00721
9335 UNION/train/UNION_00355
9335 PRICE/train/PRICE_00973
9335 GEORGE/train/GEORGE_00448
9335 PLACE/train/PLACE_00242
9335 ITSELF/train/ITSELF_00248
9335 FIGURES/train/FIGURES_00131
9335 OFFICIALS/train/OFFICIALS_00434
9335 RATES/train/RATES_00746
9335 WITHOUT/test/WITHOUT_00045
9335 GROWTH/train/GROWTH_00694
9335 MEETING/train/MEETING_00075
9335 MINISTERS/train/MINISTERS_00414
9335 INDUSTRY/train/INDUSTRY_00102
9335 SIMPLY/train/SIMPLY_00890
9335 SPENDING/train/SPENDING_00097
9335 CRISIS/train/CRISIS_00953
9335 RATES/train/RATES_00937
9335 TOGETHER/train/TOGETHER_00556
9335 INFLATION/train/INFLATION_00492
9335 DIFFERENCE/train/DIFFERENCE_00812
9335 POLICY/train/POLICY_00005
9335 SINCE/train/SINCE_00525
9335 INVESTMENT/train/INVESTMENT_00140
9335 VOTERS/train/VOTERS_00177
9335 SPEND/train/SPEND_00282
9335 CENTRAL/train/CENTRAL_00510
9335 FIGURES/train/FIGURES_00219
9335 ECONOMY/train/ECONOMY_00939
9335 FIGURES/train/FIGURES_00547
9335 THREE/val/THREE_00038
9335 GOING/train/GOING_00108
9335 KNOWN/train/KNOWN_00023
9335 FOREIGN/train/FOREIGN_00106
9335 FUTURE/train/FUTURE_00716
9335 INCREASE/train/INCREASE_00690
9335 EXPECT/train/EXPECT_00212
9335 PATIENTS/train/PATIENTS_00193
9335 DEBATE/train/DEBATE_00480
9335 CHANGE/train/CHANGE_00903
9335 INFLATION/train/INFLATION_00024
9335 AREAS/train/AREAS_00212
9335 MOVING/train/MOVING_00722
9335 RATES/train/RATES_00843
9335 MAKING/val/MAKING_00009
9335 INFLATION/train/INFLATION_00481
9335 STILL/train/STILL_00048
9335 UNDER/train/UNDER_00351
9335 LEVELS/train/LEVELS_00361
9335 CONTINUE/train/CONTINUE_00037
9335 STRONG/train/STRONG_00578
9335 WESTMINSTER/train/WESTMINSTER_00286
9335 MEETING/train/MEETING_00849
9335 SPEECH/train/SPEECH_00550
9335 POSSIBLE/train/POSSIBLE_00757
9335 REASON/train/REASON_00261
9335 YOUNG/train/YOUNG_00716
9335 ACTION/train/ACTION_00808
9335 PROBLEMS/train/PROBLEMS_00066
9335 GENERAL/test/GENERAL_00038
9335 BENEFITS/train/BENEFITS_00818
9335 GENERAL/train/GENERAL_00783
9335 SYSTEM/train/SYSTEM_00502
9335 SPENT/train/SPENT_00403
9335 FUTURE/train/FUTURE_00269
9335 CALLED/train/CALLED_00516
9335 QUESTION/train/QUESTION_00544
9335 FINANCIAL/train/FINANCIAL_00363
9335 BEHIND/train/BEHIND_00783
9335 HAPPENED/train/HAPPENED_00001
9335 WEEKS/train/WEEKS_00845
9335 BELIEVE/train/BELIEVE_00368
9335 ANNOUNCED/train/ANNOUNCED_00708
9335 BETWEEN/train/BETWEEN_00774
9335 LOCAL/train/LOCAL_00480
9335 POSITION/train/POSITION_00877
9335 SERVICE/train/SERVICE_00274
9335 WORKERS/train/WORKERS_00846
9335 MEDICAL/train/MEDICAL_00570
9335 SAYING/train/SAYING_00492
9335 TOWARDS/train/TOWARDS_00712
9335 RATES/train/RATES_00930
9335 ECONOMY/train/ECONOMY_00070
9335 INFLATION/train/INFLATION_00530
9335 START/train/START_00770
9335 GIVEN/train/GIVEN_00518
9335 DIFFERENCE/train/DIFFERENCE_00863
9335 GETTING/train/GETTING_00731
9335 INFLATION/train/INFLATION_00809
9335 IRELAND/train/IRELAND_00098
9335 INTEREST/train/INTEREST_00332
9335 OFTEN/train/OFTEN_00324
9335 RECENT/train/RECENT_00993
9335 GEORGE/train/GEORGE_00196
9335 MONEY/train/MONEY_00406
9335 TRUST/train/TRUST_00187
9335 PATIENTS/train/PATIENTS_00316
9335 TALKS/val/TALKS_00032
9335 GLOBAL/train/GLOBAL_00837
9335 ALWAYS/train/ALWAYS_00359
9335 BUSINESSES/train/BUSINESSES_00662
9335 PROBLEMS/train/PROBLEMS_00754
9335 RECENT/train/RECENT_00017
9335 BENEFITS/train/BENEFITS_00435
9335 SYSTEM/train/SYSTEM_00009
9335 REMEMBER/train/REMEMBER_00101
9335 MONTHS/train/MONTHS_00696
9335 LIVING/train/LIVING_00849
9335 MIGHT/train/MIGHT_00899
9335 RATES/train/RATES_00142
9335 RESULT/train/RESULT_00327
9335 PERIOD/train/PERIOD_00531
9335 CALLED/test/CALLED_00015
9335 TOWARDS/train/TOWARDS_00705
9335 AFFECTED/train/AFFECTED_00104
9335 POLICY/train/POLICY_00223
9335 PHONE/train/PHONE_00508
9335 OTHER/train/OTHER_00587
9335 MONTHS/val/MONTHS_00050
9335 OFTEN/train/OFTEN_00843
9335 COMING/train/COMING_00931
9335 WORKERS/train/WORKERS_00962
9335 LEVELS/train/LEVELS_00606
9335 AHEAD/train/AHEAD_00185
9335 OUTSIDE/train/OUTSIDE_00857
9335 HAPPEN/train/HAPPEN_00088
9335 ACCUSED/train/ACCUSED_00786
9335 BILLION/train/BILLION_00469
9335 HEALTH/train/HEALTH_00364
9335 TOWARDS/train/TOWARDS_00785
9335 HIGHER/train/HIGHER_00025
9335 CLAIMS/train/CLAIMS_00222
9335 INFLATION/train/INFLATION_00745
9335 SERVICES/train/SERVICES_00273
9335 ANOTHER/train/ANOTHER_00493
9335 HAPPEN/train/HAPPEN_00393
9335 BUDGET/train/BUDGET_00905
9335 HIGHER/train/HIGHER_00752
9335 CHILDREN/train/CHILDREN_00763
9335 BENEFIT/train/BENEFIT_00981
9335 PATIENTS/train/PATIENTS_00918
9335 TOWARDS/train/TOWARDS_00547
9335 INFLATION/train/INFLATION_00281
9335 FINANCIAL/train/FINANCIAL_00821
9335 BETTER/train/BETTER_00568
9335 GERMANY/train/GERMANY_00986
9335 MEASURES/train/MEASURES_00135
9335 SINCE/train/SINCE_00929
9335 COUPLE/train/COUPLE_00388
9335 GROWTH/train/GROWTH_00473
9335 INTEREST/train/INTEREST_00016
9335 PRESSURE/train/PRESSURE_00086
9335 EVENTS/train/EVENTS_00754
9335 QUITE/train/QUITE_00837
9335 WORKERS/train/WORKERS_00486
9335 PRIVATE/train/PRIVATE_00195
9335 STAGE/train/STAGE_00384
9335 COMPANIES/train/COMPANIES_00019
9335 HOUSE/train/HOUSE_00745
9335 COMPANY/train/COMPANY_00348
9335 ANOTHER/train/ANOTHER_00191
9335 AGAINST/train/AGAINST_00946
9335 PLACE/train/PLACE_00829
9335 WITHOUT/train/WITHOUT_00944
9335 QUESTION/test/QUESTION_00043
9335 WORKING/train/WORKING_00351
9335 BUSINESS/train/BUSINESS_00618
9335 INFORMATION/train/INFORMATION_00093
9335 BILLION/train/BILLION_00393
9335 STARTED/train/STARTED_00900
9335 REPORT/train/REPORT_00146
9335 CASES/train/CASES_00212
9335 BILLION/train/BILLION_00885
9335 GENERAL/train/GENERAL_00562
9335 MONEY/train/MONEY_00230
9335 STAGE/train/STAGE_00457
9335 SENIOR/test/SENIOR_00016
9335 WANTS/train/WANTS_00172
9335 HOUSE/train/HOUSE_00676
9335 MIGHT/train/MIGHT_00082
9335 MAYBE/train/MAYBE_00902
9335 MAJOR/train/MAJOR_00941
9335 GROWTH/train/GROWTH_00199
9335 HEALTH/train/HEALTH_00096
9335 SMALL/train/SMALL_00658
9335 GEORGE/train/GEORGE_00652
9335 PATIENTS/train/PATIENTS_00654
9335 WRONG/train/WRONG_00459
9335 GLOBAL/train/GLOBAL_00399
9335 COUPLE/train/COUPLE_00861
9335 SENIOR/train/SENIOR_00181
9335 STRONG/train/STRONG_00602
9335 ANOTHER/train/ANOTHER_00468
9335 COMING/train/COMING_00459
9335 CERTAINLY/train/CERTAINLY_00802
9335 MILLION/train/MILLION_00989
9335 INFLATION/train/INFLATION_00522
9335 CRISIS/train/CRISIS_00668
9335 HOUSING/train/HOUSING_00436
9335 POLICE/train/POLICE_00133
9335 INDUSTRY/train/INDUSTRY_00295
9335 INTEREST/train/INTEREST_00205
9335 WORST/train/WORST_00105
9335 ANOTHER/train/ANOTHER_00298
9335 COUPLE/train/COUPLE_00863
9335 SOCIAL/train/SOCIAL_00725
9335 STATEMENT/train/STATEMENT_00209
9335 ISSUES/train/ISSUES_00782
9335 BEFORE/test/BEFORE_00009
9335 QUESTIONS/train/QUESTIONS_00685
9335 TERMS/train/TERMS_00820
9335 WRONG/train/WRONG_00092
9335 THESE/val/THESE_00031
9335 COUNCIL/train/COUNCIL_00114
9335 INDEPENDENT/train/INDEPENDENT_00311
9335 MAJOR/test/MAJOR_00038
9335 INDUSTRY/train/INDUSTRY_00053
9335 PROVIDE/train/PROVIDE_00631
9335 GOING/train/GOING_00491
9335 ACCORDING/train/ACCORDING_00896
9335 EXTRA/train/EXTRA_00386
9335 COULD/train/COULD_00217
9335 CHALLENGE/train/CHALLENGE_00898
9335 CRISIS/train/CRISIS_00795
9335 RATES/train/RATES_00942
9335 BUDGET/train/BUDGET_00452
9335 LARGE/train/LARGE_00867
9335 GOVERNMENT/val/GOVERNMENT_00020
9335 MONEY/train/MONEY_00188
9335 FIRST/train/FIRST_00245
9335 BUSINESSES/train/BUSINESSES_00811
9335 DEBATE/train/DEBATE_00886
9335 FUTURE/train/FUTURE_00354
9335 OUTSIDE/train/OUTSIDE_00250
9335 BRITISH/train/BRITISH_00832
9335 THESE/train/THESE_00192
9335 STAFF/train/STAFF_00206
9335 GLOBAL/train/GLOBAL_00157
9335 FURTHER/train/FURTHER_00744
9335 MAKING/train/MAKING_00334
9335 PARENTS/train/PARENTS_00877
9335 POSSIBLE/train/POSSIBLE_00701
9335 INFLATION/train/INFLATION_00166
9335 BUSINESS/train/BUSINESS_00495
9335 SAYING/train/SAYING_00421
9335 SAYING/test/SAYING_00019
9335 INFLATION/train/INFLATION_00546
9335 MONEY/train/MONEY_00484
9335 ACTION/train/ACTION_00208
9335 ENGLAND/train/ENGLAND_00306
9335 NUMBERS/test/NUMBERS_00047
9335 WORDS/train/WORDS_00332
9335 PROBLEM/train/PROBLEM_00872
9335 PRIVATE/train/PRIVATE_00462
9335 POWERS/train/POWERS_00246
9335 POLITICIANS/train/POLITICIANS_00734
9335 DEFICIT/train/DEFICIT_00727
9335 GIVING/train/GIVING_00173
9335 FINAL/train/FINAL_00133
9335 MANCHESTER/train/MANCHESTER_00556
9335 INVESTMENT/train/INVESTMENT_00680
9335 GEORGE/train/GEORGE_00530
9335 EARLY/train/EARLY_00478
9335 SITUATION/train/SITUATION_00342
9335 ACTUALLY/test/ACTUALLY_00034
9335 KNOWN/train/KNOWN_00379
9335 SINCE/train/SINCE_00612
9335 DEFICIT/train/DEFICIT_00734
9335 BANKS/train/BANKS_00871
9335 TALKS/train/TALKS_00974
9335 PATIENTS/train/PATIENTS_00879
9335 ISSUE/train/ISSUE_00462
9335 BILLION/train/BILLION_00613
9335 MAJOR/train/MAJOR_00682
9335 AREAS/train/AREAS_00136
9335 MINISTERS/train/MINISTERS_00138
9335 SAYING/train/SAYING_00268
9335 ELECTION/val/ELECTION_00021
9335 BANKS/train/BANKS_00708
9335 JAMES/train/JAMES_00313
9335 INDEPENDENT/train/INDEPENDENT_00412
9335 CHANGE/train/CHANGE_00459
9335 BANKS/train/BANKS_00793
9335 BECAUSE/train/BECAUSE_00216
9335 STAGE/train/STAGE_00206
9335 BANKS/train/BANKS_00834
9335 INVESTMENT/train/INVESTMENT_00613
9335 QUITE/train/QUITE_00786
9335 TERMS/train/TERMS_00730
9335 FOLLOWING/train/FOLLOWING_00969
9335 HIGHER/train/HIGHER_00467
9335 DURING/train/DURING_00503
9335 FINANCIAL/train/FINANCIAL_00409
9335 PERIOD/train/PERIOD_00719
9335 ECONOMIC/train/ECONOMIC_00359
9335 STATEMENT/train/STATEMENT_00321
9335 CURRENT/train/CURRENT_00785
9335 CURRENT/train/CURRENT_00530
9335 INTEREST/train/INTEREST_00472
9335 SERVICES/train/SERVICES_00315
9335 REALLY/train/REALLY_00606
9335 SINGLE/train/SINGLE_00027
9335 CONCERNS/train/CONCERNS_00298
9335 GEORGE/train/GEORGE_00712
9335 PROBLEM/val/PROBLEM_00043
9335 FRIDAY/train/FRIDAY_00931
9335 ALMOST/val/ALMOST_00012
9335 INFLATION/train/INFLATION_00262
9335 CONFERENCE/train/CONFERENCE_00491
9335 YESTERDAY/train/YESTERDAY_00167
9335 SPENDING/train/SPENDING_00119
9335 STAFF/train/STAFF_00592
9335 SPENDING/train/SPENDING_00261
9335 GREECE/train/GREECE_00133
9335 SERVICES/train/SERVICES_00247
9335 BECOME/val/BECOME_00035
9335 SHORT/train/SHORT_00021
9335 POLICY/train/POLICY_00531
9335 CONCERNS/val/CONCERNS_00034
9335 BUSINESSES/train/BUSINESSES_00504
9335 DEBATE/train/DEBATE_00573
9335 PRICE/train/PRICE_00862
9335 SECTOR/train/SECTOR_00089
9335 LOCAL/train/LOCAL_00514
9335 SEEMS/train/SEEMS_00630
9335 LOCAL/test/LOCAL_00018
9335 CRISIS/train/CRISIS_00972
9335 HAPPENING/train/HAPPENING_00003
9335 BILLION/train/BILLION_00070
9335 BRITISH/train/BRITISH_00732
9335 MONTHS/train/MONTHS_00525
9335 GROWTH/train/GROWTH_00141
9335 EXACTLY/train/EXACTLY_00204
9335 PRESSURE/train/PRESSURE_00729
9335 SCOTLAND/train/SCOTLAND_00586
9335 COUPLE/train/COUPLE_00782
9335 NEEDS/train/NEEDS_00914
9335 ANSWER/train/ANSWER_00658
9335 ENGLAND/train/ENGLAND_00426
9335 POLICY/train/POLICY_00447
9335 COMES/train/COMES_00731
9335 CHALLENGE/val/CHALLENGE_00037
9335 COUPLE/train/COUPLE_00584
9335 RATES/train/RATES_00665
9335 EXTRA/train/EXTRA_00697
9335 IMPORTANT/train/IMPORTANT_00606
9335 ASKED/train/ASKED_00849
9335 COMPANIES/train/COMPANIES_01000
9335 PRETTY/train/PRETTY_00041
9335 EUROPEAN/train/EUROPEAN_00804
9335 GERMANY/train/GERMANY_00888
9335 INVESTMENT/train/INVESTMENT_00144
9335 PLANS/train/PLANS_00896
9335 EVERYBODY/test/EVERYBODY_00010
9335 COMPANIES/train/COMPANIES_00604
9335 PEOPLE/train/PEOPLE_00497
9335 PROVIDE/train/PROVIDE_00623
9335 BILLION/train/BILLION_00009
9335 STAFF/train/STAFF_00473
9335 HEALTH/train/HEALTH_00684
9335 CONTROL/train/CONTROL_00213
9335 HOUSE/train/HOUSE_00401
9335 GROWTH/train/GROWTH_00800
9335 AGAIN/train/AGAIN_00367
9335 GROWTH/train/GROWTH_00816
9335 HOUSE/train/HOUSE_00925
9335 PRIME/train/PRIME_00547
9335 THREAT/val/THREAT_00041
9335 CURRENT/train/CURRENT_00667
9335 THOSE/train/THOSE_00991
9335 SYSTEM/train/SYSTEM_00531
9335 COMING/val/COMING_00015
9335 PATIENTS/train/PATIENTS_00086
9335 RATES/train/RATES_00199
9335 ACTUALLY/train/ACTUALLY_00035
9335 EVERYBODY/train/EVERYBODY_00806
9335 ECONOMIC/train/ECONOMIC_00357
9335 BANKS/train/BANKS_00021
9335 THEIR/train/THEIR_00458
9335 COULD/train/COULD_00081
9335 TERMS/train/TERMS_00912
9335 TOWARDS/train/TOWARDS_00459
9335 BANKS/train/BANKS_00379
9335 DEFICIT/train/DEFICIT_00168
9335 THOSE/train/THOSE_00219
9335 INFORMATION/train/INFORMATION_00786
9335 GROWTH/train/GROWTH_00064
9335 UNTIL/train/UNTIL_00235
9335 CENTRAL/train/CENTRAL_00241
9335 CONCERNS/train/CONCERNS_00329
9335 MINISTERS/train/MINISTERS_00202
9335 HOUSE/train/HOUSE_00687
9335 RATES/train/RATES_00208
9335 LIVING/train/LIVING_00088
9335 HOMES/train/HOMES_00007
9335 WORKING/train/WORKING_00737
9335 GERMANY/train/GERMANY_00179
9335 BUDGET/test/BUDGET_00048
9335 INFLATION/train/INFLATION_00734
9335 AFFECTED/train/AFFECTED_00425
9335 SECTOR/train/SECTOR_00247
9335 GREECE/train/GREECE_00430
9335 RATES/train/RATES_00243
9335 GROWTH/train/GROWTH_00999
9335 EXAMPLE/train/EXAMPLE_00242
9335 UNDER/train/UNDER_00283
9335 ACROSS/train/ACROSS_00079
9335 BECAUSE/train/BECAUSE_00577
9335 POSSIBLE/train/POSSIBLE_00679
9335 SHOULD/train/SHOULD_00735
9335 RATES/train/RATES_00438
9335 EMERGENCY/train/EMERGENCY_00387
9335 EUROPEAN/train/EUROPEAN_00977
9335 RESULT/train/RESULT_00260
9335 ISSUE/train/ISSUE_00811
9335 SEVERAL/train/SEVERAL_00649
9335 HEALTH/train/HEALTH_00287
9335 INFLATION/val/INFLATION_00050
9335 SOCIETY/train/SOCIETY_00577
9335 PARENTS/train/PARENTS_00090
9335 GROWTH/train/GROWTH_00546
9335 EVERYTHING/train/EVERYTHING_00853
9335 MAJOR/train/MAJOR_00958
9335 ACCESS/train/ACCESS_00690
9335 LEVEL/train/LEVEL_00360
9335 MEASURES/train/MEASURES_00661
9335 MONTHS/train/MONTHS_00974
9335 RATHER/train/RATHER_00599
9335 LIVES/train/LIVES_00306
9335 BUSINESSES/train/BUSINESSES_00398
9335 OFFICE/train/OFFICE_00493
9335 BANKS/train/BANKS_00347
9335 EXPECT/train/EXPECT_00397
9335 AGREEMENT/train/AGREEMENT_00104
9335 WORKERS/train/WORKERS_00332
9335 FURTHER/train/FURTHER_00556
9335 POTENTIAL/train/POTENTIAL_00092
9335 ISSUE/train/ISSUE_00256
9335 NUMBERS/train/NUMBERS_00981
9335 ANNOUNCED/train/ANNOUNCED_00098
9335 GREECE/train/GREECE_00729
9335 SECTOR/train/SECTOR_00058
9335 SINGLE/train/SINGLE_00974
9335 SEEMS/train/SEEMS_00975
9335 SIGNIFICANT/train/SIGNIFICANT_00316
9335 GROWTH/train/GROWTH_00982
9335 EXPECTED/train/EXPECTED_00454
9335 INFLATION/train/INFLATION_00631
9335 DIFFICULT/train/DIFFICULT_00615
9335 SHORT/train/SHORT_00211
9335 ELECTION/train/ELECTION_00637
9335 LOOKING/train/LOOKING_00475
9335 HEALTH/train/HEALTH_00403
9335 MONEY/train/MONEY_00119
9335 EUROPEAN/train/EUROPEAN_00472
9335 ALLOWED/train/ALLOWED_00797
9335 INTEREST/train/INTEREST_00585
9335 GUILTY/train/GUILTY_00370
9335 LABOUR/train/LABOUR_00617
9335 USING/train/USING_00448
9335 CLOSE/train/CLOSE_00627
9335 MESSAGE/train/MESSAGE_00703
9335 SINGLE/train/SINGLE_00424
9335 MATTER/train/MATTER_00173
9335 GROWTH/train/GROWTH_00496
9335 AMOUNT/train/AMOUNT_00976
9335 FINANCIAL/train/FINANCIAL_00458
9335 CHANGE/train/CHANGE_00378
9335 INVOLVED/train/INVOLVED_00195
9335 BUSINESSES/train/BUSINESSES_00294
9335 SECRETARY/train/SECRETARY_00453
9335 SPEND/train/SPEND_00295
9335 SAYING/train/SAYING_00799
9335 SIGNIFICANT/train/SIGNIFICANT_00816
9335 CHANCE/train/CHANCE_00020
9335 SENIOR/train/SENIOR_00766
9335 SPEND/train/SPEND_00275
9335 GENERAL/train/GENERAL_00363
9335 LEADERS/train/LEADERS_00081
9335 WRONG/train/WRONG_00717
9335 WHETHER/train/WHETHER_00675
9335 EMERGENCY/train/EMERGENCY_00153
9335 HEALTH/train/HEALTH_00618
9335 PATIENTS/train/PATIENTS_00987
9335 LEAST/train/LEAST_00664
9335 THOUGHT/train/THOUGHT_00149
9335 COUNTRIES/train/COUNTRIES_00251
9335 STATE/train/STATE_00268
9335 RECENT/train/RECENT_00215
9335 INDEPENDENT/train/INDEPENDENT_00795
9335 EXAMPLE/train/EXAMPLE_00558
9335 GREECE/train/GREECE_00384
9335 CONSERVATIVE/train/CONSERVATIVE_00959
9335 DECISION/train/DECISION_00759
9335 LEAST/train/LEAST_00235
9335 WHICH/train/WHICH_00629
9335 COURSE/train/COURSE_00653
9335 TAKEN/val/TAKEN_00033
9335 MEASURES/train/MEASURES_00478
9335 LOOKING/val/LOOKING_00005
9335 WESTMINSTER/train/WESTMINSTER_00367
9335 INVESTMENT/train/INVESTMENT_00061
9335 FINANCIAL/train/FINANCIAL_00873
9335 NEEDS/train/NEEDS_00081
9335 INFLATION/train/INFLATION_00245
9335 CHALLENGE/train/CHALLENGE_00044
9335 AHEAD/train/AHEAD_00834
9335 DEFICIT/train/DEFICIT_00757
9335 POLITICS/test/POLITICS_00028
9335 INTEREST/train/INTEREST_00212
9335 TOMORROW/train/TOMORROW_00944
9335 COMPANIES/train/COMPANIES_00717
9335 CRISIS/train/CRISIS_00920
9335 EXPECTED/train/EXPECTED_00038
9335 SPEAKING/train/SPEAKING_00124
9335 HEALTH/train/HEALTH_00981
9335 PROBLEMS/train/PROBLEMS_00590
9335 DEFICIT/train/DEFICIT_00411
9335 FRANCE/train/FRANCE_00708
9335 CHALLENGE/train/CHALLENGE_00803
9335 RECENT/train/RECENT_00957
9335 WHOLE/train/WHOLE_00157
9335 MEMBER/train/MEMBER_00213
9335 SERVICE/train/SERVICE_00588
9335 PRIVATE/train/PRIVATE_00754
9335 MIGHT/train/MIGHT_00502
9335 AHEAD/train/AHEAD_00133
9335 CRISIS/train/CRISIS_00645
9335 PROBLEM/train/PROBLEM_00660
9335 EXPECT/train/EXPECT_00691
9335 BANKS/train/BANKS_00029
9335 NUMBERS/train/NUMBERS_00973
9335 MAJOR/train/MAJOR_00241
9335 HOMES/train/HOMES_00208
9335 INVOLVED/train/INVOLVED_00602
9335 ECONOMY/train/ECONOMY_00645
9335 LEAST/train/LEAST_00632
9335 THEIR/val/THEIR_00035
9335 ACROSS/train/ACROSS_00577
9335 RUNNING/train/RUNNING_00232
9335 POSSIBLE/train/POSSIBLE_00523
9335 MAYBE/train/MAYBE_00702
9335 TAKEN/val/TAKEN_00036
9335 INCREASE/train/INCREASE_00675
9335 GREECE/train/GREECE_00046
9335 PARLIAMENT/train/PARLIAMENT_00833
9335 AREAS/train/AREAS_00910
9335 MOVING/train/MOVING_00346
9335 WESTMINSTER/train/WESTMINSTER_00230
9335 MAYBE/train/MAYBE_00826
9335 ECONOMY/train/ECONOMY_00036
9335 MEANS/train/MEANS_00758
9335 STAND/train/STAND_00725
9335 WESTMINSTER/train/WESTMINSTER_00421
9335 WOULD/train/WOULD_00757
9335 MILLION/train/MILLION_00555
9335 ECONOMIC/train/ECONOMIC_00576
9335 RATES/train/RATES_00700
9335 WAITING/train/WAITING_00148
9335 INSIDE/train/INSIDE_00892
9335 AFFAIRS/train/AFFAIRS_00071
9335 WHICH/train/WHICH_00232
9335 INCREASE/train/INCREASE_00606
9335 EVERYONE/train/EVERYONE_00628
9335 TRYING/train/TRYING_00103
9335 RATES/train/RATES_00567
9335 AHEAD/train/AHEAD_00993
9335 CALLED/train/CALLED_00458
9335 RATES/train/RATES_00812
9335 WOULD/train/WOULD_00087
9335 LIVES/train/LIVES_00633
9335 AGREE/train/AGREE_00402
9335 MEDICAL/train/MEDICAL_00550
9335 TALKS/train/TALKS_00987
9335 RECENT/train/RECENT_00058
9335 PATIENTS/train/PATIENTS_00628
9335 MEETING/train/MEETING_00405
9335 TAKEN/train/TAKEN_00320
9335 LEVEL/train/LEVEL_00900
9335 INQUIRY/train/INQUIRY_00420
9335 SEEMS/train/SEEMS_00397
9335 GIVEN/train/GIVEN_00271
9335 PRICES/train/PRICES_00088
9335 PROVIDE/train/PROVIDE_00747
9335 CONCERNS/train/CONCERNS_00330
9335 RATES/train/RATES_00449
9335 BUSINESSES/train/BUSINESSES_00676
9335 MILLIONS/train/MILLIONS_00672
9335 FIGURES/train/FIGURES_00194
9335 PROVIDE/train/PROVIDE_00386
9335 FIGHT/train/FIGHT_00866
9335 STREET/train/STREET_00750
9335 EMERGENCY/train/EMERGENCY_00631
9335 EMERGENCY/test/EMERGENCY_00036
9335 COULD/val/COULD_00034
9335 RATES/train/RATES_00121
9335 FRONT/train/FRONT_00498
9335 BUSINESSES/train/BUSINESSES_00028
9335 ECONOMIC/train/ECONOMIC_00092
9335 BENEFIT/train/BENEFIT_00718
9335 PRESSURE/train/PRESSURE_00653
9335 POSSIBLE/train/POSSIBLE_00485
9335 COMES/train/COMES_00006
9335 MESSAGE/train/MESSAGE_00197
9335 ALLOW/train/ALLOW_00629
9335 NATIONAL/train/NATIONAL_00497
9335 COMES/train/COMES_00339
9335 BEHIND/train/BEHIND_00919
9335 LIKELY/train/LIKELY_00637
9335 HUNDREDS/train/HUNDREDS_00304
9335 PARTIES/train/PARTIES_00521
9335 CHILDREN/train/CHILDREN_00009
9335 HEARD/test/HEARD_00045
9335 STRONG/train/STRONG_00679
9335 FINANCIAL/train/FINANCIAL_00531
9335 ANYTHING/train/ANYTHING_00371
9335 THOUGHT/train/THOUGHT_00206
9335 INFLATION/train/INFLATION_00181
9335 PROVIDE/train/PROVIDE_00673
9335 MILLION/train/MILLION_00469
9335 COUPLE/train/COUPLE_00401
9335 MAJOR/train/MAJOR_00114
9335 EVIDENCE/train/EVIDENCE_00404
9335 ACTION/train/ACTION_00242
9335 SENIOR/train/SENIOR_00049
9335 BILLION/val/BILLION_00001
9335 DEFICIT/train/DEFICIT_00555
9335 GROWTH/train/GROWTH_00791
9335 NORTH/test/NORTH_00023
9335 AGREE/train/AGREE_00164
9335 TAKING/train/TAKING_00061
9335 LIVING/train/LIVING_00625
9335 PROVIDE/train/PROVIDE_00327
9335 SEVEN/train/SEVEN_00815
9335 BEHIND/train/BEHIND_00891
9335 BUDGET/train/BUDGET_00539
9335 INFLATION/train/INFLATION_00253
9335 GETTING/train/GETTING_00436
9335 STILL/train/STILL_00544
9335 GOING/train/GOING_00334
9335 YESTERDAY/train/YESTERDAY_00946
9335 MAJOR/train/MAJOR_00433
9335 AHEAD/train/AHEAD_00433
9335 STAFF/train/STAFF_00239
9335 ECONOMIC/train/ECONOMIC_00580
9335 AGREEMENT/train/AGREEMENT_00388
9335 OTHERS/train/OTHERS_00463
9335 POLITICIANS/train/POLITICIANS_00575
9335 RATES/train/RATES_00709
9335 PRICES/train/PRICES_00233
9335 SPENT/train/SPENT_00355
9335 CANCER/train/CANCER_00449
9335 PRICES/train/PRICES_00435
9335 BANKS/train/BANKS_00365
9335 BANKS/train/BANKS_00417
9335 INVOLVED/train/INVOLVED_00833
9335 MAYBE/train/MAYBE_00308
9335 EXPECT/train/EXPECT_00961
9335 COMPANY/train/COMPANY_00572
9335 INDUSTRY/train/INDUSTRY_00091
9335 INFLATION/train/INFLATION_00735
9335 SPENDING/train/SPENDING_00716
9335 BILLION/test/BILLION_00026
9335 PERIOD/train/PERIOD_00787
9335 INFLATION/train/INFLATION_00593
9335 MILLION/train/MILLION_00467
9335 MASSIVE/train/MASSIVE_00368
9335 DEBATE/train/DEBATE_00844
9335 AHEAD/train/AHEAD_00949
9335 GEORGE/train/GEORGE_00471
9335 COUPLE/train/COUPLE_00500
9335 INDEPENDENT/train/INDEPENDENT_00657
9335 GENERAL/test/GENERAL_00029
9335 GROWING/train/GROWING_00637
9335 FRANCE/train/FRANCE_00158
9335 RESPONSE/train/RESPONSE_00597
9335 SAYING/train/SAYING_00353
9335 WHILE/train/WHILE_00167
9335 FURTHER/train/FURTHER_00878
9335 BUSINESSES/train/BUSINESSES_00713
9335 REPORT/train/REPORT_00963
9335 CURRENT/train/CURRENT_00718
9335 DEFICIT/train/DEFICIT_00271
9335 INTEREST/train/INTEREST_00768
9335 PRICES/train/PRICES_00288
9335 LEVELS/train/LEVELS_00633
9335 CASES/test/CASES_00048
9335 HEALTH/train/HEALTH_00148
9335 RATES/train/RATES_00505
9335 SECTOR/train/SECTOR_00605
9335 EUROPE/train/EUROPE_00419
9335 WORKERS/train/WORKERS_00586
9335 GROWTH/train/GROWTH_00872
9335 COURSE/train/COURSE_00334
9335 BUSINESSES/train/BUSINESSES_00197
9335 AROUND/train/AROUND_00791
9335 GROWTH/train/GROWTH_00759
9335 SPENDING/train/SPENDING_00765
9335 MORNING/train/MORNING_00983
9335 LEVELS/train/LEVELS_00865
9335 ALREADY/train/ALREADY_00361
9335 BANKS/train/BANKS_00109
9335 CRISIS/train/CRISIS_00523
9335 SPENDING/train/SPENDING_00031
9335 SPECIAL/train/SPECIAL_00431
9335 FORWARD/train/FORWARD_00482
9335 PATIENTS/train/PATIENTS_00129
9335 HOSPITAL/train/HOSPITAL_00578
9335 INTEREST/train/INTEREST_00077
9335 PAYING/train/PAYING_00342
9335 FOREIGN/train/FOREIGN_00302
9335 SECTOR/train/SECTOR_00135
9335 ECONOMY/train/ECONOMY_00009
9335 NUMBERS/val/NUMBERS_00040
9335 SPENDING/val/SPENDING_00036
9335 GOING/train/GOING_00283
9335 GERMANY/train/GERMANY_00656
9335 WAITING/train/WAITING_00777
9335 TRADE/train/TRADE_00158
9335 BUSINESS/train/BUSINESS_00547
9335 ISSUES/train/ISSUES_00264
9335 QUESTIONS/train/QUESTIONS_00570
9335 PRICE/train/PRICE_00214
9335 STATEMENT/train/STATEMENT_00202
9335 PRESSURE/test/PRESSURE_00039
9335 SERVICE/train/SERVICE_00796
9335 FRONT/val/FRONT_00024
9335 BUSINESS/train/BUSINESS_00164
9335 DAVID/train/DAVID_00549
9335 CAMPAIGN/train/CAMPAIGN_00495
9335 SERIOUS/train/SERIOUS_00836
9335 COMMUNITY/train/COMMUNITY_00601
9335 CLOSE/train/CLOSE_00700
9335 CLEAR/train/CLEAR_00327
9335 MASSIVE/train/MASSIVE_00527
9335 UNDER/train/UNDER_00557
9335 HOMES/train/HOMES_00461
9335 PERIOD/train/PERIOD_00692
9335 HAPPEN/train/HAPPEN_00545
9335 COUNCIL/train/COUNCIL_00837
9335 SERVICES/train/SERVICES_00443
9335 SHORT/train/SHORT_00550
9335 BIGGEST/train/BIGGEST_00032
9335 RATES/train/RATES_00257
9335 BEING/train/BEING_00742
9335 EMERGENCY/train/EMERGENCY_00601
9335 GROWTH/train/GROWTH_00683
9335 WATER/train/WATER_00765
9335 TOMORROW/val/TOMORROW_00046
9335 WEEKS/train/WEEKS_00929
9335 PERIOD/train/PERIOD_00269
9335 EXAMPLE/train/EXAMPLE_00321
9335 INTEREST/train/INTEREST_00716
9335 EXTRA/train/EXTRA_00902
9335 BEFORE/train/BEFORE_00503
9335 INFLATION/train/INFLATION_00573
9335 INFLATION/train/INFLATION_00678
9335 BETWEEN/train/BETWEEN_00355
9335 FURTHER/train/FURTHER_00755
9335 STILL/train/STILL_00427
9335 SECTOR/train/SECTOR_00403
9335 FURTHER/train/FURTHER_00145
9335 ENOUGH/test/ENOUGH_00030
9335 FACING/train/FACING_00950
9335 PROTECT/train/PROTECT_00553
9335 COUPLE/train/COUPLE_00663
9335 CURRENT/train/CURRENT_00339
9335 SECRETARY/train/SECRETARY_00409
9335 INDUSTRY/train/INDUSTRY_00926
9335 COUPLE/train/COUPLE_00575
9335 SERVICES/train/SERVICES_00681
9335 BILLION/train/BILLION_00224
9335 CHIEF/train/CHIEF_00648
9335 POLICY/train/POLICY_00923
9335 DAVID/train/DAVID_00474
9335 ACROSS/train/ACROSS_00698
9335 TAKEN/val/TAKEN_00049
9335 LIVING/train/LIVING_00833
9335 INFLATION/train/INFLATION_00083
9335 PRESSURE/train/PRESSURE_00253
9335 SIMPLY/train/SIMPLY_00292
9335 WORDS/train/WORDS_00374
9335 STILL/train/STILL_00906
9335 CLEAR/train/CLEAR_00933
9335 COMES/train/COMES_00560
9335 MIDDLE/train/MIDDLE_00802
9335 SUPPORT/train/SUPPORT_00767
9335 WEEKS/train/WEEKS_00748
9335 ECONOMY/train/ECONOMY_00831
9335 BUSINESSES/train/BUSINESSES_00660
9335 BUSINESS/train/BUSINESS_00754
9335 AGAIN/train/AGAIN_00269
9335 WHETHER/val/WHETHER_00031
9335 DEBATE/train/DEBATE_00044
9335 FINANCIAL/train/FINANCIAL_00988
9335 GREECE/train/GREECE_00159
9335 LITTLE/train/LITTLE_00275
9335 LOCAL/train/LOCAL_00135
9335 ISSUE/train/ISSUE_00422
9335 MINISTERS/train/MINISTERS_00912
9335 FRONT/train/FRONT_00217
9335 BUDGET/train/BUDGET_00773
9335 CENTRAL/train/CENTRAL_00467
9335 OFFICE/train/OFFICE_00358
9335 UNDER/train/UNDER_00619
9335 INVOLVED/train/INVOLVED_00388
9335 START/train/START_00618
9335 SPENDING/train/SPENDING_00998
9335 PROCESS/train/PROCESS_00713
9335 ASKING/train/ASKING_00474
9335 QUESTIONS/train/QUESTIONS_00058
9335 BUDGET/train/BUDGET_00569
9335 FIRST/train/FIRST_00801
9335 GERMANY/train/GERMANY_00722
9335 GEORGE/train/GEORGE_00454
9335 WORDS/train/WORDS_00560
9335 IMPACT/train/IMPACT_00471
9335 BEFORE/train/BEFORE_00332
9335 SHORT/train/SHORT_00529
9335 SUNDAY/train/SUNDAY_00867
9335 RATES/train/RATES_00511
9335 ECONOMIC/train/ECONOMIC_00671
9335 HEARD/train/HEARD_00670
9335 GOVERNMENT/train/GOVERNMENT_00867
9335 INVESTMENT/train/INVESTMENT_00449
9335 SPENDING/train/SPENDING_00650
9335 ANSWER/train/ANSWER_00392
9335 PLACES/train/PLACES_00644
9335 EXPECT/train/EXPECT_00257
9335 MOVING/train/MOVING_00513
9335 PRICE/val/PRICE_00041
9335 DEBATE/train/DEBATE_00868
9335 THESE/train/THESE_00658
9335 HEART/train/HEART_00812
9335 LATEST/train/LATEST_00840
9335 BENEFIT/train/BENEFIT_00622
9335 LEVELS/train/LEVELS_00121
9335 PATIENTS/train/PATIENTS_00617
9335 MONEY/train/MONEY_00660
9335 THESE/train/THESE_00911
9335 PRICES/train/PRICES_00391
9335 INTEREST/train/INTEREST_00800
9335 WELCOME/train/WELCOME_00994
9335 WHOLE/val/WHOLE_00036
9335 BANKS/train/BANKS_00586
9335 INCREASE/train/INCREASE_00235
9335 INFLATION/train/INFLATION_00364
9335 MONEY/train/MONEY_00922
9335 PRICES/train/PRICES_00019
9335 ACROSS/train/ACROSS_00542
9335 GEORGE/train/GEORGE_00113
9335 ALWAYS/train/ALWAYS_00380
9335 NORTHERN/train/NORTHERN_00303
9335 THIRD/train/THIRD_00806
9335 INDUSTRY/train/INDUSTRY_00003
9335 WEEKS/train/WEEKS_00824
9335 PRESSURE/train/PRESSURE_00823
9335 SENSE/train/SENSE_00751
9335 MATTER/train/MATTER_00434
9335 BUSINESSES/train/BUSINESSES_00362
9335 GROUP/train/GROUP_00457
9335 SHORT/train/SHORT_00163
9335 TRUST/train/TRUST_00802
9335 HAPPENING/train/HAPPENING_00077
9335 DOING/test/DOING_00007
9335 WORKING/train/WORKING_00862
9335 SPENDING/val/SPENDING_00014
9335 CONTINUE/train/CONTINUE_00969
9335 BUSINESSES/train/BUSINESSES_00395
9335 ISSUE/train/ISSUE_00740
9335 MANCHESTER/train/MANCHESTER_00818
9335 EXPECT/train/EXPECT_00902
9335 CERTAINLY/test/CERTAINLY_00046
9335 BECAUSE/train/BECAUSE_00810
9335 SECTOR/train/SECTOR_00377
9335 PERIOD/train/PERIOD_00680
9335 WORKERS/train/WORKERS_00050
9335 SERIOUS/val/SERIOUS_00006
9335 START/train/START_00350
9335 BIGGEST/train/BIGGEST_00144
9335 CAMPAIGN/train/CAMPAIGN_00912
9335 RATES/train/RATES_00855
9335 SERIOUS/train/SERIOUS_00535
9335 DEFICIT/train/DEFICIT_00130
9335 PATIENTS/train/PATIENTS_00690
9335 TERMS/test/TERMS_00048
9335 HOSPITAL/train/HOSPITAL_00587
9335 MONTHS/train/MONTHS_00685
9335 BUILD/train/BUILD_00488
9335 THEMSELVES/train/THEMSELVES_00932
9335 REALLY/train/REALLY_00904
9335 THEIR/train/THEIR_00585
9335 PRESSURE/train/PRESSURE_00221
9335 PRESSURE/train/PRESSURE_00355
9335 HISTORY/train/HISTORY_00194
9335 MEDIA/train/MEDIA_00053
9335 LEADERS/val/LEADERS_00037
9335 IMPACT/train/IMPACT_00398
9335 INFLATION/train/INFLATION_00010
9335 BORDER/train/BORDER_00552
9335 CURRENT/train/CURRENT_00280
9335 AMOUNT/train/AMOUNT_00480
9335 PRIVATE/train/PRIVATE_00951
9335 FRONT/train/FRONT_00223
9335 MEETING/train/MEETING_00370
9335 RESULT/train/RESULT_00791
9335 BANKS/train/BANKS_00821
9335 REASON/train/REASON_00254
9335 INFLATION/train/INFLATION_00426
9335 BUDGET/train/BUDGET_00367
9335 SAYING/train/SAYING_00995
9335 NEEDS/train/NEEDS_00964
9335 CENTRAL/train/CENTRAL_00764
9335 BENEFITS/train/BENEFITS_00644
9335 COUPLE/train/COUPLE_00081
9335 SMALL/train/SMALL_00623
9335 DETAILS/train/DETAILS_00865
9335 SENSE/train/SENSE_00223
9335 MAJOR/train/MAJOR_00281
9335 RATHER/train/RATHER_00999
9335 GERMANY/train/GERMANY_00153
9335 CHINA/train/CHINA_00971
9335 SEEMS/train/SEEMS_00863
9335 FOLLOWING/train/FOLLOWING_00507
9335 INVOLVED/train/INVOLVED_00644
9335 POWER/train/POWER_00043
9335 COULD/train/COULD_00023
9335 CONTINUE/train/CONTINUE_00644
9335 BANKS/train/BANKS_00965
9335 AREAS/train/AREAS_00654
9335 YESTERDAY/train/YESTERDAY_00170
9335 INDUSTRY/train/INDUSTRY_00852
9335 COULD/train/COULD_00382
9335 QUITE/train/QUITE_00150
9335 EXPECTED/train/EXPECTED_00831
9335 UNDERSTAND/train/UNDERSTAND_00268
9335 BUILDING/train/BUILDING_00992
9335 BECAUSE/train/BECAUSE_00738
9335 PAYING/train/PAYING_00266
9335 ELECTION/train/ELECTION_00848
9335 CHIEF/train/CHIEF_00364
9335 SIGNIFICANT/train/SIGNIFICANT_00311
9335 JUDGE/test/JUDGE_00011
9335 INVESTMENT/train/INVESTMENT_00504
9335 STREET/train/STREET_00897
9335 CLEAR/train/CLEAR_00461
9335 WESTMINSTER/train/WESTMINSTER_00557
9335 HIGHER/train/HIGHER_00487
9335 HAPPENING/train/HAPPENING_00952
9335 OFTEN/train/OFTEN_00497
9335 DOING/train/DOING_00231
9335 EUROPE/train/EUROPE_00606
9335 PRETTY/train/PRETTY_00407
9335 INVESTMENT/train/INVESTMENT_00463
9335 SERIOUS/train/SERIOUS_00177
9335 SECOND/train/SECOND_00503
9335 WORKING/train/WORKING_00428
9335 STARTED/train/STARTED_00421
9335 SECRETARY/train/SECRETARY_00909
9335 STORY/train/STORY_00888
9335 PRESS/train/PRESS_00655
9335 PERSONAL/test/PERSONAL_00037
9335 DETAILS/train/DETAILS_00986
9335 SOCIAL/val/SOCIAL_00044
9335 YESTERDAY/train/YESTERDAY_00517
9335 GROWTH/train/GROWTH_00533
9335 REPORT/train/REPORT_00668
9335 STAGE/train/STAGE_00599
9335 BEING/train/BEING_00248
9335 BUSINESS/train/BUSINESS_00741
9335 SERIOUS/train/SERIOUS_00284
9335 TRADE/train/TRADE_00747
9335 CALLED/train/CALLED_00789
9335 MAJOR/train/MAJOR_00939
9335 WORDS/test/WORDS_00020
9335 INDEPENDENT/train/INDEPENDENT_00587
9335 MIGHT/train/MIGHT_00151
9335 MINISTERS/train/MINISTERS_00855
9335 AFRICA/train/AFRICA_00361
9335 VICTIMS/train/VICTIMS_00343
9335 PROBABLY/train/PROBABLY_00238
9335 THEMSELVES/train/THEMSELVES_00941
9335 GETTING/train/GETTING_00429
9335 PROCESS/train/PROCESS_00469
9335 FAMILIES/train/FAMILIES_00236
9335 MAYBE/train/MAYBE_00299
9335 DIFFERENCE/train/DIFFERENCE_00716
9335 NOTHING/train/NOTHING_00512
9335 AGAIN/train/AGAIN_00091
9335 ANYTHING/train/ANYTHING_00019
9335 POSITION/train/POSITION_00512
9335 WEEKS/train/WEEKS_00915
9335 PERIOD/val/PERIOD_00032
9335 SINCE/train/SINCE_00652
9335 OFFICIALS/train/OFFICIALS_00335
9335 COUPLE/train/COUPLE_00969
9335 LITTLE/train/LITTLE_00012
9335 RECENT/train/RECENT_00739
9335 SIGNIFICANT/train/SIGNIFICANT_00426
9335 WRONG/train/WRONG_00784
9335 YESTERDAY/train/YESTERDAY_00812
9335 SPENDING/train/SPENDING_00990
9335 PRETTY/train/PRETTY_00951
9335 POTENTIAL/train/POTENTIAL_00507
9335 ATTACKS/train/ATTACKS_00614
9335 GOING/train/GOING_00171
9335 MEASURES/train/MEASURES_00246
9335 GLOBAL/train/GLOBAL_00348
9335 MINISTERS/train/MINISTERS_00046
9335 HEART/train/HEART_00819
9335 STATE/train/STATE_00909
9335 QUESTIONS/train/QUESTIONS_00412
9335 GROWTH/train/GROWTH_00179
9335 HIGHER/train/HIGHER_00577
9335 BETWEEN/train/BETWEEN_00878
9335 OPPOSITION/train/OPPOSITION_00537
9335 CASES/train/CASES_00384
9335 PROVIDE/train/PROVIDE_00795
9335 ECONOMIC/train/ECONOMIC_00733
9335 LONDON/train/LONDON_00077
9335 MINISTER/train/MINISTER_00010
9335 LIVING/train/LIVING_00842
9335 SYSTEM/train/SYSTEM_00657
9335 BANKS/train/BANKS_00284
9335 MESSAGE/train/MESSAGE_00730
9335 INCREASE/train/INCREASE_00664
9335 DESPITE/train/DESPITE_00186
9335 CASES/train/CASES_00793
9335 BETTER/train/BETTER_00833
9335 SAYING/train/SAYING_00520
9335 CERTAINLY/train/CERTAINLY_00587
9335 TAKING/train/TAKING_00885
9335 SPENDING/train/SPENDING_00962
9335 YOUNG/train/YOUNG_00726
9335 STRONG/train/STRONG_00699
9335 MONTHS/train/MONTHS_00955
9335 IRELAND/train/IRELAND_00176
9335 PARTS/train/PARTS_00194
9335 RECENT/train/RECENT_00381
9335 EXAMPLE/train/EXAMPLE_00028
9335 PATIENTS/train/PATIENTS_00461
9335 MEASURES/train/MEASURES_00016
9335 INFLATION/train/INFLATION_00737
9335 ISSUES/train/ISSUES_00051
9335 EMERGENCY/train/EMERGENCY_00328
9335 ISSUES/train/ISSUES_00625
9335 STAFF/train/STAFF_00023
9335 POLICY/train/POLICY_00644
9335 BRING/train/BRING_00418
9335 FINANCIAL/train/FINANCIAL_00420
9335 WHERE/train/WHERE_00963
9335 THING/train/THING_00896
9335 SOMETHING/train/SOMETHING_00259
9335 FACING/train/FACING_00606
9335 MAJOR/train/MAJOR_00492
9335 SECTOR/train/SECTOR_00781
9335 NUMBERS/train/NUMBERS_00521
9335 COURSE/train/COURSE_00864
9335 PERIOD/train/PERIOD_00771
9335 STATEMENT/train/STATEMENT_00756
9335 STAGE/train/STAGE_00450
9335 OTHERS/train/OTHERS_00587
9335 EXAMPLE/train/EXAMPLE_00819
9335 BILLION/val/BILLION_00017
9335 PRETTY/train/PRETTY_00185
9335 BANKS/train/BANKS_00603
9335 SCOTTISH/test/SCOTTISH_00031
9335 HIGHER/train/HIGHER_00374
9335 BANKS/train/BANKS_00587
9335 FIGURES/train/FIGURES_00502
9335 BUDGET/train/BUDGET_00241
9335 SEVERAL/test/SEVERAL_00015
9335 INFLATION/train/INFLATION_00173
9335 BECOME/train/BECOME_00119
9335 FINANCIAL/train/FINANCIAL_00657
9335 THREE/train/THREE_00454
9335 COURSE/train/COURSE_00607
9335 ISSUE/train/ISSUE_00180
9335 THING/train/THING_00544
9335 EMERGENCY/train/EMERGENCY_00380
9335 LEADER/train/LEADER_00935
9335 DECISION/train/DECISION_00189
9335 BELIEVE/train/BELIEVE_00884
9335 DEFICIT/train/DEFICIT_00704
9335 BIGGEST/train/BIGGEST_00855
9335 PROBLEMS/train/PROBLEMS_00746
9335 FOCUS/train/FOCUS_00427
9335 NEEDS/train/NEEDS_00427
9335 SPENDING/train/SPENDING_00366
9335 LEVELS/test/LEVELS_00049
9335 BUILD/train/BUILD_00384
9335 LEADERS/train/LEADERS_00642
9335 CHALLENGE/train/CHALLENGE_00632
9335 HOUSING/train/HOUSING_00777
9335 FRANCE/train/FRANCE_00945
9335 HEALTH/train/HEALTH_00627
9335 ALLOW/train/ALLOW_00592
9335 SUPPORT/train/SUPPORT_00602
9335 FIRST/train/FIRST_00817
9335 GENERAL/train/GENERAL_00894
9335 PAYING/train/PAYING_00465
9335 MASSIVE/train/MASSIVE_00646
9335 ANNOUNCED/train/ANNOUNCED_00950
9335 INDUSTRY/train/INDUSTRY_00247
9335 SECTOR/train/SECTOR_00187
9335 ACTUALLY/train/ACTUALLY_00513
9335 ECONOMY/train/ECONOMY_00584
9335 HAPPEN/train/HAPPEN_00072
9335 SPENDING/train/SPENDING_00231
9335 MAJORITY/test/MAJORITY_00023
9335 STATES/train/STATES_00858
9335 CONCERNS/train/CONCERNS_00003
9335 MEASURES/train/MEASURES_00839
9335 PLACE/train/PLACE_00795
9335 PRETTY/test/PRETTY_00015
9335 FINANCIAL/train/FINANCIAL_00920
9335 AGREE/train/AGREE_00702
9335 SERVICES/train/SERVICES_00964
9335 REPORT/train/REPORT_00436
9335 HOSPITAL/train/HOSPITAL_00661
9335 BUSINESSES/train/BUSINESSES_00419
9335 EMERGENCY/train/EMERGENCY_00493
9335 CONFERENCE/train/CONFERENCE_00009
9335 HAPPEN/train/HAPPEN_00703
9335 HISTORY/train/HISTORY_00339
9335 GROWING/train/GROWING_00072
9335 NEEDS/train/NEEDS_00839
9335 CHANGES/train/CHANGES_00472
9335 EXAMPLE/train/EXAMPLE_00156
9335 POWERS/train/POWERS_00617
9335 WHETHER/train/WHETHER_00411
9335 TALKS/train/TALKS_00259
9335 COMPANY/train/COMPANY_00192
9335 CHIEF/train/CHIEF_00118
9335 GOING/train/GOING_00633
9335 STARTED/train/STARTED_00917
9335 FRONT/val/FRONT_00022
9335 WALES/train/WALES_00441
9335 RATES/train/RATES_00822
9335 GROWTH/train/GROWTH_00513
9335 REASON/train/REASON_00017
9335 AFFECTED/train/AFFECTED_00043
9335 BUILDING/train/BUILDING_00578
9335 RUNNING/train/RUNNING_00607
9335 BENEFITS/train/BENEFITS_00792
9335 BANKS/train/BANKS_00542
9335 BUDGET/val/BUDGET_00027
9335 SPEND/test/SPEND_00035
9335 SINCE/train/SINCE_00019
9335 ALLOWED/train/ALLOWED_00335
9335 YEARS/train/YEARS_00261
9335 FIGURES/train/FIGURES_00665
9335 SMALL/train/SMALL_00639
9335 GROWTH/train/GROWTH_00592
9335 YESTERDAY/train/YESTERDAY_00156
9335 CRISIS/train/CRISIS_00017
9335 SERIOUS/train/SERIOUS_00079
9335 INDEPENDENT/train/INDEPENDENT_00523
9335 SOMEONE/train/SOMEONE_00817
9335 WORKING/train/WORKING_00387
9335 INFLATION/train/INFLATION_00498
9335 ECONOMIC/train/ECONOMIC_00595
9335 ACTION/train/ACTION_00836
9335 AFFECTED/train/AFFECTED_00356
9335 INFLATION/train/INFLATION_00807
9335 BILLION/train/BILLION_00672
9335 INTEREST/train/INTEREST_00100
9335 UNDERSTAND/train/UNDERSTAND_00173
9335 DAVID/train/DAVID_00725
9335 BANKS/train/BANKS_00192
9335 FRENCH/train/FRENCH_00167
9335 HAVING/test/HAVING_00031
9335 DEFICIT/train/DEFICIT_00240
9335 COUPLE/train/COUPLE_00609
9335 BILLION/test/BILLION_00037
9335 ECONOMY/train/ECONOMY_00514
9335 MONTH/train/MONTH_00415
9335 FINANCIAL/test/FINANCIAL_00005
9335 PRESSURE/train/PRESSURE_00665
9335 IMPACT/train/IMPACT_00954
9335 INVESTMENT/train/INVESTMENT_00176
9335 HEALTH/train/HEALTH_00193
9335 SYSTEM/train/SYSTEM_00244
9335 AFTERNOON/train/AFTERNOON_00118
9335 ELECTION/train/ELECTION_00353
9335 SENSE/train/SENSE_00146
9335 EMERGENCY/train/EMERGENCY_00698
9335 PARLIAMENT/train/PARLIAMENT_00662
9335 SOMETHING/train/SOMETHING_00423
9335 WRONG/train/WRONG_00765
9335 PERIOD/train/PERIOD_00830
9335 REPORT/train/REPORT_00013
9335 GROWTH/train/GROWTH_00992
9335 SOCIAL/train/SOCIAL_00326
9335 EVENTS/train/EVENTS_00261
9335 MESSAGE/train/MESSAGE_00577
9335 HEALTH/train/HEALTH_00833
9335 BUDGET/train/BUDGET_00973
9335 BANKS/train/BANKS_00398
9335 OTHERS/train/OTHERS_00945
9335 BROUGHT/train/BROUGHT_00758
9335 LONGER/train/LONGER_00134
9335 AGAIN/train/AGAIN_00615
9335 COMPANIES/train/COMPANIES_00611
9335 SHOULD/train/SHOULD_00988
9335 MOVING/train/MOVING_00274
9335 STREET/train/STREET_00601
9335 COUPLE/train/COUPLE_00299
9335 MONTHS/train/MONTHS_00877
9335 SEVERAL/train/SEVERAL_00320
9335 CRISIS/train/CRISIS_00639
9335 BUSINESS/train/BUSINESS_00602
9335 OTHERS/train/OTHERS_00628
9335 COURT/train/COURT_00392
9335 AREAS/train/AREAS_00413
9335 DEFICIT/train/DEFICIT_00499
9335 LATEST/train/LATEST_00472
9335 SEVERAL/train/SEVERAL_00891
9335 INVESTMENT/train/INVESTMENT_00010
9335 EUROPEAN/train/EUROPEAN_00862
9335 SENIOR/train/SENIOR_00732
9335 TALKS/test/TALKS_00004
9335 FINAL/train/FINAL_00510
9335 INDUSTRY/val/INDUSTRY_00024
9335 GIVEN/train/GIVEN_00117
9335 TAKING/train/TAKING_00310
9335 ECONOMIC/train/ECONOMIC_00626
9335 CENTRAL/train/CENTRAL_00959
9335 WANTED/train/WANTED_00498
9335 HOSPITAL/train/HOSPITAL_00838
9335 USING/train/USING_00251
9335 CHALLENGE/train/CHALLENGE_00619
9335 FINANCIAL/train/FINANCIAL_00424
9335 SERVICES/train/SERVICES_00724
9335 NUMBER/train/NUMBER_00606
9335 LONDON/train/LONDON_00746
9335 SIDES/test/SIDES_00009
9335 RATHER/train/RATHER_00339
9335 NUMBERS/train/NUMBERS_00801
9335 POINT/train/POINT_00961
9335 PRETTY/train/PRETTY_00672
9335 RATES/train/RATES_00592
9335 CRISIS/train/CRISIS_00255
9335 EXTRA/train/EXTRA_00334
9335 HAPPENING/train/HAPPENING_00959
9335 GROWTH/train/GROWTH_00581
9335 COMES/train/COMES_00798
9335 GROWTH/train/GROWTH_00290
9335 JAMES/train/JAMES_00197
9335 BANKS/train/BANKS_00512
9335 PERIOD/train/PERIOD_00881
9335 SOCIETY/train/SOCIETY_00279
9335 INTEREST/train/INTEREST_00874
9335 GEORGE/train/GEORGE_00816
9335 RECENT/train/RECENT_00678
9335 ANNOUNCED/train/ANNOUNCED_00781
9335 HOUSE/train/HOUSE_00405
9335 GERMANY/train/GERMANY_00309
9335 MIGHT/train/MIGHT_00285
9335 FIGURES/train/FIGURES_00718
9335 NEEDS/train/NEEDS_00206
9335 MEMBERS/train/MEMBERS_00209
9335 STORY/train/STORY_00513
9335 QUESTIONS/train/QUESTIONS_00052
9335 BILLION/train/BILLION_00710
9335 POINT/train/POINT_00113
9335 SERIOUS/val/SERIOUS_00030
9335 OFTEN/train/OFTEN_00480
9335 EVERYONE/test/EVERYONE_00046
9335 GROWTH/train/GROWTH_00099
9335 FIGURES/train/FIGURES_00220
9335 WANTS/train/WANTS_00128
9335 THIRD/train/THIRD_00491
9335 STILL/train/STILL_00388
9335 MAJOR/train/MAJOR_00711
9335 SAYING/train/SAYING_00884
9335 THINGS/train/THINGS_00044
9335 CHIEF/train/CHIEF_00105
9335 SOCIAL/train/SOCIAL_00837
9335 FIGURES/train/FIGURES_00206
9335 RUNNING/train/RUNNING_00931
9335 BROUGHT/train/BROUGHT_00308
9335 GROWTH/train/GROWTH_00382
9335 AFFECTED/train/AFFECTED_00191
9335 GOING/train/GOING_00595
9335 LIKELY/train/LIKELY_00820
9335 GREECE/train/GREECE_00831
9335 QUITE/train/QUITE_00240
9335 HEALTH/train/HEALTH_00969
9335 COULD/train/COULD_00540
9335 SERVICES/train/SERVICES_00161
9335 GOVERNMENT/train/GOVERNMENT_00813
9335 GROWTH/train/GROWTH_00901
9335 INFLATION/train/INFLATION_00674
9335 ALREADY/train/ALREADY_00689
9335 EXTRA/train/EXTRA_00460
9335 INDUSTRY/train/INDUSTRY_00770
9335 SITUATION/train/SITUATION_00942
9335 ECONOMY/train/ECONOMY_00113
9335 MILLIONS/train/MILLIONS_00313
9335 ENGLAND/train/ENGLAND_00874
9335 CHANGES/train/CHANGES_00561
9335 COMES/train/COMES_00546
9335 RIGHT/test/RIGHT_00013
9335 EXPECT/train/EXPECT_00696
9335 LIVING/train/LIVING_00505
9335 DIFFERENCE/train/DIFFERENCE_00458
9335 MEDICAL/val/MEDICAL_00028
9335 SINCE/train/SINCE_00987
9335 STAND/train/STAND_00979
9335 MARKET/train/MARKET_00162
9335 NEEDS/train/NEEDS_00720
9335 KNOWN/train/KNOWN_00479
9335 MINISTER/train/MINISTER_00803
9335 COMMUNITY/val/COMMUNITY_00006
9335 GROWING/train/GROWING_00776
9335 SPENDING/train/SPENDING_00701
9335 TALKS/val/TALKS_00021
9335 SEEMS/train/SEEMS_00176
9335 MAJOR/train/MAJOR_00259
9335 NATIONAL/train/NATIONAL_00366
9335 HOURS/train/HOURS_00884
9335 SERIES/train/SERIES_00067
9335 INCREASE/train/INCREASE_00682
9335 CHIEF/train/CHIEF_00145
9335 SECTOR/train/SECTOR_00679
9335 COUPLE/train/COUPLE_00104
9335 ABSOLUTELY/train/ABSOLUTELY_00059
9335 COMES/test/COMES_00017
9335 WORDS/train/WORDS_00594
9335 BENEFIT/train/BENEFIT_00918
9335 DIFFERENT/train/DIFFERENT_00916
9335 PROVIDE/train/PROVIDE_00258
9335 ISSUE/train/ISSUE_00101
9335 CENTRAL/train/CENTRAL_00011
9335 ISSUE/train/ISSUE_00034
9335 INFLATION/train/INFLATION_00167
9335 THEIR/train/THEIR_00147
9335 DOING/train/DOING_00980
9335 PROVIDE/train/PROVIDE_00551
9335 STAND/train/STAND_00333
9335 MONTHS/train/MONTHS_00760
9335 MESSAGE/train/MESSAGE_00808
9335 REALLY/train/REALLY_00777
9335 POSSIBLE/train/POSSIBLE_00769
9335 COMMUNITY/train/COMMUNITY_00171
9335 RECENT/test/RECENT_00013
9335 WEEKS/train/WEEKS_00976
9335 FRENCH/train/FRENCH_00417
9335 FIGURES/train/FIGURES_00852
9335 MORNING/train/MORNING_00773
9335 BEHIND/train/BEHIND_00420
9335 COULD/train/COULD_00454
9335 PRICES/train/PRICES_00343
9335 SEEMS/train/SEEMS_00784
9335 INFLATION/train/INFLATION_00640
9335 NORTHERN/train/NORTHERN_00718
9335 SPEND/train/SPEND_00228
9335 UNDERSTAND/train/UNDERSTAND_00449
9335 CHALLENGE/train/CHALLENGE_00080
9335 SAYING/train/SAYING_00743
9335 OTHERS/val/OTHERS_00014
9335 COMPANY/train/COMPANY_00281
9335 GENERAL/train/GENERAL_00510
9335 MEASURES/train/MEASURES_00847
9335 BENEFIT/train/BENEFIT_00067
9335 OTHERS/train/OTHERS_00444
9335 EVIDENCE/test/EVIDENCE_00022
9335 MARKET/train/MARKET_00508
9335 INCREASE/train/INCREASE_00819
9335 WORKING/test/WORKING_00041
9335 PLACES/train/PLACES_00234
9335 BUILD/train/BUILD_00097
9335 BANKS/train/BANKS_00635
9335 SUPPORT/train/SUPPORT_00665
9335 MOVING/train/MOVING_00739
9335 PERIOD/train/PERIOD_00821
9335 QUITE/train/QUITE_00958
9335 LONGER/train/LONGER_00030
9335 CONTINUE/train/CONTINUE_00155
9335 COMING/train/COMING_00239
9335 SPENDING/train/SPENDING_00508
9335 BUDGET/test/BUDGET_00006
9335 WHICH/train/WHICH_00943
9335 TOWARDS/train/TOWARDS_00436
9335 BANKS/train/BANKS_00775
9335 SERIOUS/train/SERIOUS_00127
9335 EXPECTED/train/EXPECTED_00969
9335 MONTH/train/MONTH_00412
9335 LATEST/train/LATEST_00306
9335 NUMBERS/train/NUMBERS_00473
9335 ACCESS/train/ACCESS_00883
9335 POLICY/train/POLICY_00795
9335 FORCE/train/FORCE_00653
9335 HAVING/train/HAVING_00559
9335 SOCIETY/train/SOCIETY_00326
9335 TODAY/train/TODAY_00873
9335 THREAT/train/THREAT_00707
9335 FIGURES/train/FIGURES_00987
9335 OFTEN/train/OFTEN_00748
9335 MINISTERS/train/MINISTERS_00636
9335 STILL/train/STILL_00845
9335 POLICY/train/POLICY_00435
9335 RECORD/train/RECORD_00904
9335 DEBATE/train/DEBATE_00924
9335 GENERAL/train/GENERAL_00035
9335 HAPPEN/train/HAPPEN_00872
9335 FOLLOWING/train/FOLLOWING_00485
9335 BELIEVE/train/BELIEVE_00518
9368 MEDIA/train/MEDIA_00321
9368 HOUSE/train/HOUSE_00896
9368 THINK/train/THINK_00853
9368 TAKEN/train/TAKEN_00127
9368 AGREEMENT/train/AGREEMENT_00805
9368 HEARD/train/HEARD_00209
9368 CONFERENCE/train/CONFERENCE_00772
9368 SUNDAY/train/SUNDAY_00896
9368 HOUSE/train/HOUSE_00905
9368 ENOUGH/train/ENOUGH_00742
9368 ISSUES/train/ISSUES_00057
9368 POLICY/train/POLICY_00254
9368 SOUTH/train/SOUTH_00317
9368 PRIME/train/PRIME_00681
9368 GENERAL/train/GENERAL_00922
9368 RULES/val/RULES_00045
9368 AMONG/train/AMONG_00488
9368 WOULD/train/WOULD_00050
9368 SITUATION/train/SITUATION_00779
9368 MILLION/train/MILLION_00805
9368 SIMPLY/train/SIMPLY_00679
9368 MOMENT/train/MOMENT_00022
9368 INCREASE/val/INCREASE_00042
9368 PERSON/train/PERSON_00118
9368 MOVING/train/MOVING_00852
9368 POSITION/train/POSITION_00340
9368 BEFORE/train/BEFORE_00720
9368 SHOULD/train/SHOULD_00049
9368 PROCESS/train/PROCESS_00760
9368 TOGETHER/train/TOGETHER_00005
9368 DIFFERENT/train/DIFFERENT_00835
9368 PRETTY/train/PRETTY_00140
9368 ACTION/train/ACTION_00929
9368 MESSAGE/train/MESSAGE_00679
9368 SOCIAL/train/SOCIAL_00201
9368 PRETTY/train/PRETTY_00606
9368 PLANS/train/PLANS_00145
9368 EVENTS/train/EVENTS_00677
9368 STATEMENT/train/STATEMENT_00422
9368 STREET/train/STREET_00780
9368 AGREE/train/AGREE_00709
9368 FORCES/train/FORCES_00430
9368 INDUSTRY/train/INDUSTRY_00048
9368 ASKING/test/ASKING_00021
9368 PROBLEM/train/PROBLEM_00089
9368 EVERYTHING/train/EVERYTHING_00889
9368 PRETTY/train/PRETTY_00414
9368 OTHER/train/OTHER_00729
9368 FOREIGN/train/FOREIGN_00108
9368 DEBATE/train/DEBATE_00130
9368 FUTURE/train/FUTURE_00949
9368 PLANS/train/PLANS_00611
9368 AHEAD/train/AHEAD_00348
9368 REASON/train/REASON_00670
9368 EXACTLY/train/EXACTLY_00517
9368 SHORT/train/SHORT_00245
9368 MIDDLE/train/MIDDLE_00194
9368 RUSSIAN/train/RUSSIAN_00789
9368 LEADER/train/LEADER_00557
9368 INTEREST/train/INTEREST_00458
9368 DEFICIT/train/DEFICIT_00456
9368 SENSE/train/SENSE_00150
9368 COURSE/train/COURSE_00273
9368 OBAMA/train/OBAMA_00231
9368 WHICH/train/WHICH_00142
9368 MIDDLE/train/MIDDLE_00146
9368 ORDER/train/ORDER_00195
9368 TALKS/train/TALKS_00181
9368 STATEMENT/train/STATEMENT_00942
9368 AGREEMENT/test/AGREEMENT_00026
9368 SUNDAY/train/SUNDAY_00684
9368 STATE/train/STATE_00173
9368 SPECIAL/train/SPECIAL_00914
9368 KNOWN/train/KNOWN_00460
9368 AMERICA/train/AMERICA_00171
9368 EXPECTED/train/EXPECTED_00061
9368 INQUIRY/train/INQUIRY_00573
9368 FRENCH/train/FRENCH_00454
9368 FUTURE/train/FUTURE_00147
9368 MORNING/train/MORNING_00757
9368 RIGHT/test/RIGHT_00026
9368 ALLOWED/train/ALLOWED_00800
9368 AMERICAN/train/AMERICAN_00297
9368 FOREIGN/train/FOREIGN_00284
9368 RUSSIAN/train/RUSSIAN_00597
9368 EXAMPLE/train/EXAMPLE_00247
9368 LEVEL/train/LEVEL_00809
9368 ANSWER/train/ANSWER_00442
9368 OPPOSITION/train/OPPOSITION_00602
9368 REALLY/train/REALLY_00475
9368 AGREEMENT/test/AGREEMENT_00030
9368 GROUP/train/GROUP_00137
9368 TALKS/train/TALKS_00930
9368 OBAMA/train/OBAMA_00204
9368 WEAPONS/train/WEAPONS_00088
9368 LOOKING/train/LOOKING_00815
9368 BELIEVE/train/BELIEVE_00958
9368 FORMER/train/FORMER_00532
9368 RUSSIAN/train/RUSSIAN_00262
9368 WHERE/val/WHERE_00004
9368 EVENING/train/EVENING_00005
9368 INVOLVED/train/INVOLVED_00041
9368 VIOLENCE/val/VIOLENCE_00049
9368 SEEMS/train/SEEMS_00303
9368 QUITE/train/QUITE_00228
9368 RUSSIA/train/RUSSIA_00866
9368 ABSOLUTELY/train/ABSOLUTELY_00261
9368 RUSSIAN/train/RUSSIAN_00070
9368 TONIGHT/train/TONIGHT_00558
9368 STATEMENT/train/STATEMENT_00529
9368 LEAVE/train/LEAVE_00989
9368 CAMPAIGN/train/CAMPAIGN_00873
9368 BROUGHT/train/BROUGHT_00947
9368 USING/val/USING_00049
9368 TERMS/train/TERMS_00162
9368 SENSE/train/SENSE_00395
9368 SPECIAL/train/SPECIAL_00750
9368 MIGHT/train/MIGHT_00748
9368 FRANCE/train/FRANCE_00294
9368 EASTERN/train/EASTERN_00004
9368 FOREIGN/train/FOREIGN_00837
9368 TAKEN/train/TAKEN_00625
9368 COUNCIL/train/COUNCIL_00517
9368 NATIONAL/train/NATIONAL_00483
9368 TRADE/train/TRADE_00066
9368 ISLAMIC/train/ISLAMIC_00408
9368 INTEREST/train/INTEREST_00735
9368 WANTED/train/WANTED_00007
9368 THEIR/train/THEIR_00382
9368 STATES/train/STATES_00295
9368 GETTING/train/GETTING_00673
9368 LOCAL/train/LOCAL_00671
9368 EXPECT/train/EXPECT_00602
9368 GREAT/train/GREAT_00086
9368 HUMAN/train/HUMAN_00432
9368 MOVING/train/MOVING_00007
9368 CHANCE/train/CHANCE_00740
9368 ELECTION/train/ELECTION_00103
9368 ANOTHER/val/ANOTHER_00018
9368 SENSE/train/SENSE_00189
9368 EXAMPLE/train/EXAMPLE_00189
9368 RUSSIAN/train/RUSSIAN_00141
9368 AGREE/train/AGREE_00735
9368 TODAY/train/TODAY_00847
9368 MEMBERS/train/MEMBERS_00721
9368 THOUGHT/train/THOUGHT_00129
9368 CASES/train/CASES_00259
9368 SITUATION/train/SITUATION_00737
9368 PROBLEMS/train/PROBLEMS_00072
9368 ASKED/train/ASKED_00419
9368 MILITARY/train/MILITARY_00074
9368 FINAL/train/FINAL_00765
9368 FORCE/train/FORCE_00953
9368 USING/test/USING_00029
9368 HEAVY/train/HEAVY_00256
9368 COUPLE/train/COUPLE_00906
9368 GETTING/train/GETTING_00818
9368 GENERAL/train/GENERAL_00993
9368 LOOKING/val/LOOKING_00049
9368 GREAT/train/GREAT_00043
9368 REASON/train/REASON_00573
9368 PRETTY/val/PRETTY_00043
9368 WEEKS/val/WEEKS_00020
9368 HAPPEN/train/HAPPEN_00534
9368 EXAMPLE/train/EXAMPLE_00854
9368 GREAT/train/GREAT_00707
9368 MEETING/train/MEETING_00019
9368 TALKS/train/TALKS_00093
9368 SIDES/train/SIDES_00582
9368 MEMBER/val/MEMBER_00003
9368 ORDER/train/ORDER_00227
9368 MEASURES/train/MEASURES_00373
9368 OPPOSITION/train/OPPOSITION_00056
9368 RUSSIA/train/RUSSIA_00158
9368 HOURS/train/HOURS_00331
9368 EASTERN/train/EASTERN_00673
9368 LONGER/train/LONGER_00301
9368 CLOSE/train/CLOSE_00039
9368 MOMENT/train/MOMENT_00582
9368 FORCES/train/FORCES_00663
9368 TALKING/train/TALKING_00870
9368 WESTMINSTER/train/WESTMINSTER_00411
9368 SEEMS/train/SEEMS_00948
9368 DIFFERENT/train/DIFFERENT_00325
9368 HOURS/train/HOURS_00881
9368 TONIGHT/train/TONIGHT_00576
9368 VIOLENCE/train/VIOLENCE_00021
9368 ISLAMIC/val/ISLAMIC_00014
9368 SUPPORT/train/SUPPORT_00914
9368 GROUP/train/GROUP_00725
9368 FRENCH/train/FRENCH_00646
9368 POLICY/train/POLICY_00904
9368 FUTURE/train/FUTURE_00672
9368 LEAVE/train/LEAVE_00661
9368 CURRENT/train/CURRENT_00305
9368 RUSSIA/train/RUSSIA_00235
9368 SOMETHING/train/SOMETHING_00907
9368 CRIME/train/CRIME_00192
9368 POLITICS/train/POLITICS_00127
9368 HAPPEN/train/HAPPEN_00290
9368 CLEAR/train/CLEAR_00861
9368 MINISTER/train/MINISTER_00470
9368 SENSE/train/SENSE_00540
9368 BUDGET/train/BUDGET_00610
9368 ISSUE/train/ISSUE_00032
9368 RULES/train/RULES_00556
9368 PERSON/train/PERSON_00924
9368 BROUGHT/train/BROUGHT_00768
9368 INQUIRY/train/INQUIRY_00851
9368 FOCUS/train/FOCUS_00457
9368 PRIME/train/PRIME_00691
9368 SERVICES/val/SERVICES_00005
9368 CERTAINLY/train/CERTAINLY_00312
9368 WEAPONS/train/WEAPONS_00916
9368 SEEMS/train/SEEMS_00718
9368 INVOLVED/train/INVOLVED_00056
9368 CONFERENCE/train/CONFERENCE_00118
9368 PROCESS/train/PROCESS_00297
9368 BUILD/train/BUILD_00575
9368 REMEMBER/train/REMEMBER_00427
9368 THING/train/THING_00400
9368 RUSSIAN/train/RUSSIAN_00992
9368 WHICH/train/WHICH_00512
9368 LEADERSHIP/train/LEADERSHIP_00729
9368 MEMBERS/train/MEMBERS_00615
9368 SENSE/train/SENSE_00778
9368 AMERICA/train/AMERICA_00662
9368 HOSPITAL/train/HOSPITAL_00498
9368 RETURN/train/RETURN_00755
9368 SENSE/train/SENSE_00408
9368 TALKING/train/TALKING_00092
9368 OBAMA/train/OBAMA_00754
9368 REASON/train/REASON_00016
9368 ITSELF/train/ITSELF_00243
9368 ORDER/train/ORDER_00544
9368 DESPITE/train/DESPITE_00041
9368 EDITOR/train/EDITOR_00536
9368 AMERICA/train/AMERICA_00504
9368 RUSSIAN/train/RUSSIAN_00926
9368 MINUTES/train/MINUTES_00385
9368 COULD/train/COULD_00198
9368 SITUATION/train/SITUATION_00276
9368 ANSWER/train/ANSWER_00059
9368 OBAMA/train/OBAMA_00347
9368 WESTERN/train/WESTERN_00432
9368 ACROSS/train/ACROSS_00408
9368 PROTECT/train/PROTECT_00382
9368 ORDER/train/ORDER_00672
9368 WHOLE/train/WHOLE_00937
9368 CONTROL/train/CONTROL_00391
9368 SAYING/train/SAYING_00281
9368 FRANCE/train/FRANCE_00576
9368 TALKS/train/TALKS_00286
9368 PRESSURE/train/PRESSURE_00492
9368 POWERS/train/POWERS_00654
9368 ISLAMIC/val/ISLAMIC_00011
9368 DIFFERENCE/train/DIFFERENCE_00751
9368 DETAILS/train/DETAILS_00128
9368 LARGE/train/LARGE_00070
9368 MAYBE/train/MAYBE_00237
9368 SOCIAL/train/SOCIAL_00220
9368 STRONG/train/STRONG_00190
9368 COULD/train/COULD_00048
9368 RECORD/train/RECORD_00231
9368 THING/train/THING_00505
9368 EVIDENCE/val/EVIDENCE_00004
9368 GROUND/train/GROUND_00553
9368 WANTED/train/WANTED_00909
9368 SAYING/train/SAYING_00005
9368 HAPPEN/train/HAPPEN_00442
9368 SECURITY/train/SECURITY_00063
9368 STATEMENT/train/STATEMENT_00110
9368 CONCERNS/train/CONCERNS_00810
9368 SECOND/train/SECOND_00575
9368 THOSE/train/THOSE_00319
9368 SYRIAN/train/SYRIAN_00782
9368 TAKING/train/TAKING_00949
9368 CRISIS/train/CRISIS_00052
9368 THREAT/train/THREAT_00299
9368 EVIDENCE/train/EVIDENCE_00819
9368 MAJOR/train/MAJOR_00840
9368 GOING/train/GOING_00860
9368 MINUTES/train/MINUTES_00692
9368 BUSINESS/train/BUSINESS_00369
9368 RUSSIA/train/RUSSIA_00570
9368 LEADERSHIP/train/LEADERSHIP_00037
9368 EXAMPLE/train/EXAMPLE_00046
9368 ISSUES/train/ISSUES_00953
9368 GREECE/train/GREECE_00114
9368 POINT/train/POINT_00220
9368 RUSSIAN/train/RUSSIAN_00428
9368 INQUIRY/train/INQUIRY_00513
9368 MURDER/train/MURDER_00619
9368 WOULD/train/WOULD_00582
9368 MINISTERS/train/MINISTERS_00731
9368 REALLY/train/REALLY_00314
9368 PARLIAMENT/train/PARLIAMENT_00440
9368 GROUP/train/GROUP_00608
9368 QUESTION/train/QUESTION_00663
9368 PARLIAMENT/train/PARLIAMENT_00895
9368 LIVES/train/LIVES_00534
9368 RESPONSE/train/RESPONSE_00230
9368 TRADE/train/TRADE_00553
9368 DURING/train/DURING_00128
9368 SYRIA/train/SYRIA_00966
9368 SYRIAN/train/SYRIAN_00177
9368 FORCES/train/FORCES_00842
9368 CAPITAL/train/CAPITAL_00031
9368 ISSUES/train/ISSUES_00595
9368 POLICY/train/POLICY_00673
9368 AHEAD/train/AHEAD_00485
9368 WEAPONS/val/WEAPONS_00021
9368 HOUSE/train/HOUSE_00492
9368 NUMBERS/train/NUMBERS_00741
9368 ARRESTED/train/ARRESTED_00385
9368 TOWARDS/train/TOWARDS_00050
9368 CRIME/train/CRIME_00115
9368 AMERICA/train/AMERICA_00918
9368 RUSSIA/train/RUSSIA_00844
9368 COUPLE/train/COUPLE_00731
9368 OFTEN/train/OFTEN_00490
9368 SENIOR/train/SENIOR_00386
9368 STATE/train/STATE_00747
9368 WESTERN/train/WESTERN_00571
9368 BROUGHT/train/BROUGHT_00715
9368 INDUSTRY/train/INDUSTRY_00225
9368 HOSPITAL/train/HOSPITAL_00046
9368 ECONOMIC/train/ECONOMIC_00609
9368 SOMETHING/train/SOMETHING_00847
9368 POTENTIAL/train/POTENTIAL_00516
9368 RUSSIA/train/RUSSIA_00858
9368 GROUND/train/GROUND_00811
9368 PROCESS/train/PROCESS_00305
9368 COUNTRIES/train/COUNTRIES_00281
9368 SUPPORT/train/SUPPORT_00392
9368 GROUP/train/GROUP_00335
9368 LONGER/train/LONGER_00122
9368 POLITICAL/train/POLITICAL_00400
9368 FORMER/train/FORMER_00709
9368 ALMOST/train/ALMOST_00219
9368 INFORMATION/train/INFORMATION_00244
9368 OBAMA/train/OBAMA_00397
9368 PROCESS/train/PROCESS_00485
9368 MAJORITY/train/MAJORITY_00748
9368 POLICY/train/POLICY_00213
9368 WHOLE/train/WHOLE_00995
9368 SIDES/train/SIDES_00496
9368 RATHER/test/RATHER_00005
9368 COULD/train/COULD_00891
9368 MAKING/train/MAKING_00719
9368 MEMBERS/val/MEMBERS_00009
9368 FOREIGN/train/FOREIGN_00224
9368 THEIR/train/THEIR_00672
9368 CAMERON/test/CAMERON_00009
9368 SMALL/train/SMALL_00502
9368 WESTERN/train/WESTERN_00409
9368 LITTLE/train/LITTLE_00745
9368 YESTERDAY/train/YESTERDAY_00113
9368 MILLION/train/MILLION_00343
9368 RUSSIAN/train/RUSSIAN_00648
9368 COURT/test/COURT_00019
9368 MOMENT/train/MOMENT_00899
9368 BETTER/train/BETTER_00470
9368 CRISIS/train/CRISIS_00300
9368 HEAVY/train/HEAVY_00155
9368 SHORT/train/SHORT_00909
9368 LEADERS/train/LEADERS_00067
9368 AMOUNT/train/AMOUNT_00955
9368 COMPANY/train/COMPANY_00323
9368 SIDES/train/SIDES_00267
9368 PRETTY/train/PRETTY_00785
9368 OBAMA/train/OBAMA_00300
9368 TERMS/train/TERMS_00273
9368 TERMS/train/TERMS_00941
9368 PROCESS/train/PROCESS_00092
9368 COUNTRIES/train/COUNTRIES_00875
9368 WITHIN/train/WITHIN_00044
9368 MESSAGE/train/MESSAGE_00939
9368 PARLIAMENT/train/PARLIAMENT_00958
9368 AMERICA/train/AMERICA_00557
9368 OTHERS/train/OTHERS_00740
9368 AGAIN/train/AGAIN_00965
9368 RUSSIAN/train/RUSSIAN_00089
9368 THESE/train/THESE_00876
9368 TODAY/train/TODAY_00137
9368 TONIGHT/train/TONIGHT_00836
9368 WANTS/train/WANTS_00304
9368 WOULD/train/WOULD_00240
9368 POWER/train/POWER_00420
9368 RUSSIA/train/RUSSIA_00750
9368 LEADER/train/LEADER_00292
9368 ANSWER/train/ANSWER_00446
9368 RUSSIAN/train/RUSSIAN_00257
9368 FORWARD/train/FORWARD_00322
9368 BRITAIN/train/BRITAIN_00352
9368 THIRD/train/THIRD_00222
9368 SEEMS/train/SEEMS_00764
9368 RATHER/train/RATHER_00382
9368 THERE/train/THERE_00223
9368 WHILE/train/WHILE_00797
9368 GROUND/train/GROUND_00932
9368 BROUGHT/train/BROUGHT_00571
9368 TALKS/train/TALKS_00983
9368 PERSONAL/train/PERSONAL_00671
9368 FORCES/train/FORCES_00751
9368 TRYING/train/TRYING_00791
9368 QUESTION/train/QUESTION_00619
9368 EXAMPLE/train/EXAMPLE_00062
9368 STARTED/train/STARTED_00311
9368 LEAVE/train/LEAVE_00245
9368 MILITARY/train/MILITARY_00082
9368 ALWAYS/train/ALWAYS_00622
9368 ACTION/train/ACTION_00140
9368 SYRIAN/train/SYRIAN_00336
9368 DECIDED/test/DECIDED_00025
9368 ANYTHING/train/ANYTHING_00034
9368 EASTERN/train/EASTERN_00993
9368 BRING/val/BRING_00013
9368 BECOME/train/BECOME_00056
9368 STATE/train/STATE_00786
9368 FORWARD/train/FORWARD_00971
9368 COUNCIL/train/COUNCIL_00472
9368 HOUSE/train/HOUSE_00302
9368 RECENT/val/RECENT_00005
9368 RESPONSE/train/RESPONSE_00787
9368 NUMBER/train/NUMBER_00462
9368 SOMETHING/train/SOMETHING_00894
9368 RULES/train/RULES_00279
9368 EXACTLY/val/EXACTLY_00006
9368 TONIGHT/train/TONIGHT_00737
9368 GROUND/train/GROUND_00701
9368 ECONOMIC/train/ECONOMIC_00045
9368 FOREIGN/train/FOREIGN_00001
9368 WHILE/train/WHILE_00898
9368 ITSELF/train/ITSELF_00195
9368 LEAVE/train/LEAVE_00474
9368 PROTECT/train/PROTECT_00226
9368 WHERE/train/WHERE_00501
9368 HOUSE/train/HOUSE_00072
9368 WHILE/train/WHILE_00314
9368 SEEMS/train/SEEMS_00844
9368 BRITISH/train/BRITISH_00264
9368 PERHAPS/train/PERHAPS_00544
9368 WEAPONS/train/WEAPONS_00203
9368 AMERICAN/train/AMERICAN_00539
9368 PRESIDENT/train/PRESIDENT_00362
9368 FORCE/train/FORCE_00734
9368 WHERE/train/WHERE_00195
9368 BRITAIN/train/BRITAIN_00484
9368 SECURITY/train/SECURITY_00949
9368 SAYING/train/SAYING_00792
9368 SERVICES/train/SERVICES_00773
9368 ECONOMY/train/ECONOMY_00047
9368 AHEAD/train/AHEAD_00607
9368 SHOULD/train/SHOULD_00384
9368 INQUIRY/train/INQUIRY_00447
9368 EVENING/train/EVENING_00311
9368 POTENTIAL/train/POTENTIAL_00236
9368 STATES/train/STATES_00169
9368 LIVES/train/LIVES_00579
9368 GOING/train/GOING_00360
9368 MOVING/train/MOVING_00325
9368 WEEKS/train/WEEKS_00379
9368 OFFICIALS/train/OFFICIALS_00675
9368 ATTACKS/train/ATTACKS_00749
9368 SIGNIFICANT/train/SIGNIFICANT_00345
9368 SPECIAL/train/SPECIAL_00383
9368 ANOTHER/train/ANOTHER_00062
9368 GERMANY/train/GERMANY_00492
9368 FIGHT/train/FIGHT_00237
9368 COURSE/train/COURSE_00551
9368 BUILDING/train/BUILDING_00920
9368 CHANGES/train/CHANGES_00189
9368 OPPOSITION/train/OPPOSITION_00759
9368 FORCES/train/FORCES_00157
9368 NATIONAL/train/NATIONAL_00909
9368 ACTION/train/ACTION_00228
9368 WEAPONS/train/WEAPONS_00548
9368 ALLOW/train/ALLOW_00230
9368 BIGGEST/train/BIGGEST_00087
9368 FORCES/train/FORCES_00617
9368 DURING/train/DURING_00591
9368 WORKERS/val/WORKERS_00015
9368 SENSE/train/SENSE_00790
9368 MIGRANTS/train/MIGRANTS_00604
9368 SYRIA/val/SYRIA_00014
9368 AGAIN/train/AGAIN_00757
9368 CONFLICT/val/CONFLICT_00019
9368 RUSSIAN/train/RUSSIAN_00909
9368 COULD/train/COULD_00498
9368 COMPANY/train/COMPANY_00284
9368 ISSUES/train/ISSUES_00433
9368 AMERICAN/train/AMERICAN_00706
9368 FORCES/train/FORCES_00676
9368 BANKS/train/BANKS_00435
9368 PRESS/train/PRESS_00549
9368 NEEDS/train/NEEDS_00896
9368 MILITARY/train/MILITARY_00810
9368 STILL/train/STILL_00710
9368 BROUGHT/train/BROUGHT_00460
9368 WOMEN/train/WOMEN_00631
9368 ISSUE/train/ISSUE_00583
9368 ABSOLUTELY/test/ABSOLUTELY_00031
9368 BETWEEN/train/BETWEEN_00605
9368 GROUND/train/GROUND_00181
9368 DESCRIBED/train/DESCRIBED_00056
9368 MOVING/train/MOVING_00770
9368 POLITICS/train/POLITICS_00968
9368 CLEAR/train/CLEAR_00387
9368 AGREE/train/AGREE_00489
9368 SECRETARY/train/SECRETARY_00961
9368 SEVERAL/train/SEVERAL_00366
9368 WHETHER/train/WHETHER_00819
9368 INSIDE/train/INSIDE_00201
9368 EXAMPLE/train/EXAMPLE_00841
9368 CURRENT/train/CURRENT_00397
9368 PRESSURE/train/PRESSURE_00618
9368 ATTACK/val/ATTACK_00002
9368 IMPACT/train/IMPACT_00119
9368 OFFICIALS/train/OFFICIALS_00499
9368 INVOLVED/train/INVOLVED_00380
9368 RUSSIAN/train/RUSSIAN_00646
9368 CLEAR/train/CLEAR_00558
9368 YESTERDAY/train/YESTERDAY_00953
9368 PARTIES/train/PARTIES_00478
9368 COUNTRIES/train/COUNTRIES_00919
9368 FRANCE/train/FRANCE_00303
9368 AMERICAN/train/AMERICAN_00285
9368 CHARGES/train/CHARGES_00765
9368 LATEST/train/LATEST_00685
9368 WEEKS/train/WEEKS_00415
9368 RUSSIAN/train/RUSSIAN_00010
9368 CASES/train/CASES_00146
9368 ANOTHER/train/ANOTHER_00115
9368 WEAPONS/train/WEAPONS_00053
9368 SYRIAN/train/SYRIAN_00088
9368 ABOUT/train/ABOUT_00004
9368 SAYING/train/SAYING_00250
9368 PARTIES/train/PARTIES_00185
9368 OPPOSITION/train/OPPOSITION_00821
9368 HAPPENED/train/HAPPENED_00572
9368 LEVEL/train/LEVEL_00367
9368 BORDER/train/BORDER_00858
9368 WESTERN/train/WESTERN_00884
9368 ANSWER/train/ANSWER_00564
9368 RUSSIA/train/RUSSIA_00651
9368 SIDES/train/SIDES_00632
9368 CHINA/train/CHINA_00459
9368 RUSSIA/train/RUSSIA_00201
9368 STATE/train/STATE_00165
9368 TAKING/train/TAKING_00068
9368 TRYING/train/TRYING_00813
9368 CASES/train/CASES_00823
9368 GENERAL/test/GENERAL_00024
9368 POSSIBLE/train/POSSIBLE_00098
9368 HEARD/train/HEARD_00755
9368 EXAMPLE/val/EXAMPLE_00032
9368 EUROPEAN/train/EUROPEAN_00572
9368 VIOLENCE/train/VIOLENCE_00602
9368 PROBLEMS/train/PROBLEMS_00651
9368 DURING/train/DURING_00312
9368 TIMES/train/TIMES_00379
9368 SERVICE/train/SERVICE_00514
9368 PERSON/train/PERSON_00992
9368 VIOLENCE/train/VIOLENCE_00528
9368 POWER/train/POWER_00365
9368 RESPONSE/train/RESPONSE_00697
9368 BROUGHT/test/BROUGHT_00040
9368 TODAY/train/TODAY_00133
9368 RULES/train/RULES_00334
9368 SIGNIFICANT/train/SIGNIFICANT_00679
9368 SENIOR/train/SENIOR_00947
9368 SMALL/train/SMALL_00528
9368 CHINA/train/CHINA_00804
9368 SENSE/val/SENSE_00007
9368 STILL/train/STILL_00146
9368 GOING/train/GOING_00970
9368 ISSUES/train/ISSUES_00658
9368 PRESIDENT/train/PRESIDENT_00671
9368 NIGHT/train/NIGHT_00016
9368 ANNOUNCED/train/ANNOUNCED_00225
9368 STAND/train/STAND_00067
9368 QUESTIONS/train/QUESTIONS_00405
9368 GERMANY/train/GERMANY_00963
9368 MILITARY/train/MILITARY_00611
9368 ALREADY/train/ALREADY_00344
9368 MIGHT/train/MIGHT_00546
9368 PRESS/train/PRESS_00387
9368 BUDGET/train/BUDGET_00672
9368 EVENTS/train/EVENTS_00688
9368 SERIES/train/SERIES_00707
9368 LEADERSHIP/train/LEADERSHIP_00763
9368 UNITED/train/UNITED_00221
9368 SECRETARY/train/SECRETARY_00327
9368 BENEFIT/test/BENEFIT_00026
9368 NUMBER/train/NUMBER_00860
9368 CONFLICT/train/CONFLICT_00647
9368 HISTORY/train/HISTORY_00307
9368 WOULD/train/WOULD_00426
9368 EVIDENCE/train/EVIDENCE_00923
9368 HAPPENED/train/HAPPENED_00976
9368 THEIR/train/THEIR_00369
9368 IMPORTANT/train/IMPORTANT_00252
9368 DESCRIBED/train/DESCRIBED_00711
9368 HEARD/train/HEARD_00963
9368 OBAMA/train/OBAMA_00791
9368 RUSSIAN/train/RUSSIAN_00571
9368 HAPPEN/train/HAPPEN_00672
9368 AHEAD/train/AHEAD_00519
9368 OFFICIALS/train/OFFICIALS_00799
9368 GROUND/train/GROUND_00757
9368 MEETING/train/MEETING_00680
9368 SYRIA/train/SYRIA_00178
9368 LEVEL/train/LEVEL_00173
9368 WEAPONS/train/WEAPONS_00774
9368 STILL/train/STILL_00496
9368 STATES/train/STATES_00106
9368 THING/train/THING_00376
9368 PROBLEM/train/PROBLEM_00506
9368 PRESIDENT/train/PRESIDENT_00177
9368 LEGAL/train/LEGAL_00517
9368 MEETING/train/MEETING_00579
9368 WHILE/train/WHILE_00457
9368 TRYING/train/TRYING_00460
9368 DURING/train/DURING_00163
9368 DEATH/train/DEATH_00805
9368 CHANCE/train/CHANCE_00208
9368 WORLD/train/WORLD_00382
9368 WEAPONS/train/WEAPONS_00235
9368 MILITARY/train/MILITARY_00720
9368 MEETING/train/MEETING_00315
9368 SENSE/train/SENSE_00251
9368 NIGHT/train/NIGHT_00601
9368 NATIONAL/train/NATIONAL_00732
9368 AHEAD/train/AHEAD_00218
9368 AGAIN/train/AGAIN_00201
9368 PERSON/train/PERSON_00200
9368 CHANGE/train/CHANGE_00437
9368 CONCERNS/train/CONCERNS_00347
9368 CAMPAIGN/train/CAMPAIGN_00089
9368 SENSE/train/SENSE_00639
9368 WITHIN/train/WITHIN_00388
9368 OBAMA/train/OBAMA_00283
9368 THINK/train/THINK_00823
9368 WOULD/train/WOULD_00065
9368 CONSERVATIVE/train/CONSERVATIVE_00028
9368 WHOLE/train/WHOLE_00034
9368 EUROPE/train/EUROPE_00371
9368 MILITARY/train/MILITARY_00140
9368 FORCES/train/FORCES_00649
9368 FORCES/train/FORCES_00998
9368 ITSELF/train/ITSELF_00140
9368 ACTION/train/ACTION_00664
9368 TRYING/train/TRYING_00999
9368 UNDER/train/UNDER_00517
9368 TAKING/train/TAKING_00087
9368 ISSUE/train/ISSUE_00016
9368 CANNOT/train/CANNOT_00370
9368 GERMANY/val/GERMANY_00048
9368 POSSIBLE/train/POSSIBLE_00660
9368 RUSSIAN/train/RUSSIAN_00568
9368 INVOLVED/train/INVOLVED_00875
9368 GERMANY/train/GERMANY_00453
9368 RUSSIA/train/RUSSIA_00514
9368 EVENING/train/EVENING_00451
9368 ANSWER/train/ANSWER_00382
9368 MAJOR/train/MAJOR_00113
9368 AMERICA/train/AMERICA_00379
9368 ATTACK/train/ATTACK_00942
9368 FORCES/train/FORCES_00690
9368 BRITISH/train/BRITISH_00940
9368 PRIME/train/PRIME_00558
9368 FIRST/train/FIRST_00379
9368 KNOWN/train/KNOWN_00506
9368 TERMS/train/TERMS_00833
9368 LEADER/train/LEADER_00279
9368 FRENCH/test/FRENCH_00007
9368 GENERAL/train/GENERAL_00278
9368 WHILE/train/WHILE_00153
9368 TRYING/train/TRYING_00042
9368 SENSE/train/SENSE_00213
9368 WITHOUT/test/WITHOUT_00032
9368 MIGHT/train/MIGHT_00004
9368 GROUND/train/GROUND_00592
9368 PARTIES/train/PARTIES_00597
9368 ACTUALLY/train/ACTUALLY_00624
9368 THING/train/THING_00239
9368 GREECE/train/GREECE_00300
9368 SAYING/train/SAYING_00901
9368 IMPACT/train/IMPACT_00976
9368 AFFECTED/train/AFFECTED_00346
9368 FINANCIAL/train/FINANCIAL_00671
9368 COUNTRY/train/COUNTRY_00113
9368 GREECE/train/GREECE_00467
9368 GROUP/train/GROUP_00816
9368 NUMBER/train/NUMBER_00153
9368 CHINA/train/CHINA_00290
9368 HOUSE/train/HOUSE_00542
9368 WHOLE/train/WHOLE_00750
9368 WEEKS/train/WEEKS_00015
9368 QUESTION/train/QUESTION_00492
9368 TAKING/train/TAKING_00497
9368 UNDERSTAND/train/UNDERSTAND_00501
9368 SECRETARY/train/SECRETARY_00136
9368 HEARD/train/HEARD_00735
9368 THINK/train/THINK_00517
9368 STATES/train/STATES_00748
9368 FOREIGN/train/FOREIGN_00654
9368 REALLY/train/REALLY_00607
9368 HAPPENING/val/HAPPENING_00024
9368 WITHOUT/train/WITHOUT_00390
9368 CALLED/train/CALLED_00323
9368 LEADERSHIP/train/LEADERSHIP_00448
9368 FRENCH/val/FRENCH_00049
9368 POLITICS/train/POLITICS_00036
9368 ISSUES/train/ISSUES_00446
9368 OFFICIALS/train/OFFICIALS_00397
9368 SYRIAN/train/SYRIAN_00871
9368 LEGAL/train/LEGAL_00346
9368 THEIR/train/THEIR_00282
9368 PUBLIC/train/PUBLIC_00601
9368 RUSSIAN/train/RUSSIAN_00371
9368 SITUATION/train/SITUATION_00989
9368 CASES/train/CASES_00547
9368 TOWARDS/train/TOWARDS_00289
9368 SECURITY/train/SECURITY_00962
9368 ACTION/val/ACTION_00050
9368 CONTROL/train/CONTROL_00022
9368 EVENING/train/EVENING_00780
9368 SERIES/train/SERIES_00277
9368 TAKEN/train/TAKEN_00656
9368 IMPORTANT/train/IMPORTANT_00860
9368 INFORMATION/train/INFORMATION_00601
9368 MIDDLE/train/MIDDLE_00590
9368 DETAILS/train/DETAILS_00622
9368 SYRIAN/train/SYRIAN_00095
9368 ISSUE/train/ISSUE_00630
9368 PROTECT/test/PROTECT_00020
9368 AGREEMENT/train/AGREEMENT_00063
9368 MINISTERS/train/MINISTERS_00392
9368 TRYING/train/TRYING_00874
9368 WHILE/train/WHILE_00273
9368 QUESTION/train/QUESTION_00675
9368 WESTERN/train/WESTERN_00643
9368 MAYBE/train/MAYBE_00101
9368 CURRENT/train/CURRENT_00668
9368 SECRETARY/train/SECRETARY_00132
9368 CRISIS/train/CRISIS_00207
9368 PLACES/train/PLACES_00040
9368 INTEREST/train/INTEREST_00695
9368 PEOPLE/train/PEOPLE_00466
9368 RUNNING/train/RUNNING_00473
9368 FOREIGN/train/FOREIGN_00917
9368 WITHIN/train/WITHIN_00725
9368 WEEKEND/train/WEEKEND_00668
9368 FACING/train/FACING_00327
9368 STRONG/train/STRONG_00821
9368 RESPONSE/train/RESPONSE_00875
9368 AGREEMENT/train/AGREEMENT_00282
9368 GROWING/val/GROWING_00046
9368 YEARS/train/YEARS_00905
9368 EXAMPLE/train/EXAMPLE_00474
9368 ECONOMIC/train/ECONOMIC_00876
9368 TOGETHER/train/TOGETHER_00368
9368 CHANGE/train/CHANGE_00106
9368 COUNCIL/train/COUNCIL_00026
9368 CHANGE/train/CHANGE_00443
9368 RUSSIAN/train/RUSSIAN_00596
9368 WEAPONS/train/WEAPONS_00566
9368 TAKING/train/TAKING_00282
9368 EUROPE/test/EUROPE_00046
9368 SENIOR/test/SENIOR_00047
9368 POSITION/train/POSITION_00675
9368 RUSSIAN/train/RUSSIAN_00675
9368 CALLED/train/CALLED_00874
9368 PHONE/train/PHONE_00849
9368 SEEMS/train/SEEMS_00951
9368 MEASURES/train/MEASURES_00767
9368 CONFERENCE/train/CONFERENCE_00806
9368 FOREIGN/train/FOREIGN_00525
9368 OBAMA/train/OBAMA_00761
9368 SEEMS/train/SEEMS_00153
9368 CONFERENCE/train/CONFERENCE_00422
9368 FRENCH/train/FRENCH_00969
9368 RUSSIAN/train/RUSSIAN_00396
9368 COURSE/train/COURSE_00729
9368 OBAMA/train/OBAMA_00691
9368 MIDDLE/train/MIDDLE_00080
9368 SYRIAN/train/SYRIAN_00507
9368 COMPANY/train/COMPANY_00228
9368 MEANS/train/MEANS_00633
9368 THOSE/train/THOSE_00810
9368 RUSSIAN/train/RUSSIAN_00042
9368 BECOME/train/BECOME_00956
9368 HAPPENED/train/HAPPENED_00363
9368 RUSSIAN/train/RUSSIAN_00215
9368 COUNTRIES/val/COUNTRIES_00014
9368 LEAST/train/LEAST_00565
9368 CENTRAL/val/CENTRAL_00048
9368 EUROPEAN/train/EUROPEAN_00298
9368 PRETTY/train/PRETTY_00703
9368 PRESS/train/PRESS_00081
9368 BUILDING/train/BUILDING_00972
9368 FOREIGN/train/FOREIGN_00796
9368 TALKING/train/TALKING_00368
9368 SECURITY/train/SECURITY_00352
9368 SENSE/train/SENSE_00776
9368 SOMETHING/train/SOMETHING_00135
9368 BEING/val/BEING_00016
9368 THROUGH/train/THROUGH_00808
9368 THIRD/train/THIRD_00879
9368 WITHOUT/train/WITHOUT_00255
9368 YEARS/train/YEARS_00961
9368 LEADERS/train/LEADERS_00993
9368 SIDES/train/SIDES_00544
9368 COUNCIL/train/COUNCIL_00027
9368 WEAPONS/train/WEAPONS_00202
9368 QUESTION/train/QUESTION_00894
9368 NOTHING/train/NOTHING_00780
9368 COMMUNITY/train/COMMUNITY_00570
9368 TALKING/train/TALKING_00501
9368 BECOME/train/BECOME_00153
9368 TALKING/train/TALKING_00103
9368 CASES/train/CASES_00049
9368 WANTS/train/WANTS_00188
9368 HAPPENING/train/HAPPENING_00834
9368 ACTION/train/ACTION_00650
9368 LARGE/train/LARGE_00353
9368 OTHER/train/OTHER_00005
9368 OPERATION/train/OPERATION_00050
9368 TAKING/train/TAKING_00617
9368 THOUGHT/train/THOUGHT_00393
9368 RESPONSE/train/RESPONSE_00202
9368 OPERATION/train/OPERATION_00450
9368 POWER/train/POWER_00167
9368 CONTROL/train/CONTROL_00447
9368 MILITARY/train/MILITARY_00943
9368 THESE/train/THESE_00875
9368 THINGS/train/THINGS_00697
9368 COMING/val/COMING_00012
9368 COMPANIES/train/COMPANIES_00549
9368 UNDER/train/UNDER_00965
9368 YEARS/val/YEARS_00032
9368 OPPOSITION/train/OPPOSITION_00616
9368 DURING/train/DURING_00890
9368 COUNTRIES/train/COUNTRIES_00569
9368 HOUSING/train/HOUSING_00334
9368 GREECE/test/GREECE_00031
9368 AUTHORITIES/train/AUTHORITIES_00464
9368 LEGAL/train/LEGAL_00133
9368 NATIONAL/train/NATIONAL_00137
9368 AMERICA/train/AMERICA_00869
9368 CHANCE/val/CHANCE_00029
9368 ALLOW/train/ALLOW_00724
9368 ISSUES/train/ISSUES_00838
9368 MILITARY/train/MILITARY_00143
9368 FRENCH/train/FRENCH_00799
9368 FORWARD/train/FORWARD_00524
9368 THREAT/train/THREAT_00272
9368 UNDERSTAND/train/UNDERSTAND_00380
9368 SEEMS/train/SEEMS_00792
9368 TRYING/train/TRYING_00757
9368 TONIGHT/val/TONIGHT_00041
9368 FOLLOWING/val/FOLLOWING_00008
9368 ABOUT/train/ABOUT_00637
9368 TODAY/train/TODAY_00272
9368 COURT/train/COURT_00506
9368 ALLOW/train/ALLOW_00449
9368 TRYING/train/TRYING_00388
9368 NATIONAL/train/NATIONAL_00583
9368 SEVERAL/train/SEVERAL_00733
9368 CHANGE/train/CHANGE_00178
9368 STATES/train/STATES_00320
9368 ABOUT/train/ABOUT_00009
9368 HAVING/train/HAVING_00241
9368 MIGHT/train/MIGHT_00602
9368 MIGHT/train/MIGHT_00500
9368 SYRIAN/train/SYRIAN_00692
9368 FINANCIAL/train/FINANCIAL_00361
9368 COMMUNITY/train/COMMUNITY_00702
9368 HAPPENED/train/HAPPENED_00440
9368 ISLAMIC/train/ISLAMIC_00856
9368 POINT/train/POINT_00989
9368 SYRIA/train/SYRIA_00331
9368 MEMBERS/train/MEMBERS_00852
9368 AMONG/train/AMONG_00418
9368 RESULT/train/RESULT_00421
9368 CALLED/train/CALLED_00839
9368 CLEAR/train/CLEAR_00291
9368 GOVERNMENT/train/GOVERNMENT_00877
9368 HAPPENING/train/HAPPENING_00571
9368 FRONT/train/FRONT_00723
9368 LEADERSHIP/train/LEADERSHIP_00680
9368 THERE/train/THERE_00826
9368 SENSE/train/SENSE_00940
9368 SMALL/train/SMALL_00087
9368 RUSSIAN/train/RUSSIAN_00796
9368 GIVEN/train/GIVEN_00707
9368 REALLY/train/REALLY_00328
9368 DESPITE/train/DESPITE_00811
9368 WATCHING/train/WATCHING_00075
9368 CLEAR/val/CLEAR_00001
9368 MILLIONS/train/MILLIONS_00399
9368 THIRD/train/THIRD_00069
9368 LEVEL/train/LEVEL_00792
9368 TOGETHER/train/TOGETHER_00191
9368 THESE/train/THESE_00441
9368 TALKS/train/TALKS_00595
9368 RUSSIA/train/RUSSIA_00843
9368 CHARGES/train/CHARGES_00580
9368 GROWING/train/GROWING_00989
9368 SPECIAL/train/SPECIAL_00401
9368 MILITARY/train/MILITARY_00406
9368 SHORT/train/SHORT_00734
9368 EXAMPLE/train/EXAMPLE_00494
9368 BEHIND/train/BEHIND_00834
9368 CALLED/train/CALLED_00031
9368 MILITARY/train/MILITARY_00862
9368 DIFFICULT/train/DIFFICULT_00868
9368 NUMBERS/train/NUMBERS_00112
9368 RUSSIA/train/RUSSIA_00861
9368 EDITOR/train/EDITOR_00584
9368 ALWAYS/train/ALWAYS_00392
9368 TOGETHER/train/TOGETHER_00441
9368 SPENT/train/SPENT_00233
9368 SINGLE/train/SINGLE_00579
9368 COUPLE/train/COUPLE_00260
9368 MIGRANTS/val/MIGRANTS_00003
9368 EXAMPLE/train/EXAMPLE_00511
9368 INVOLVED/train/INVOLVED_00540
9368 RUSSIAN/train/RUSSIAN_00936
9368 FOREIGN/train/FOREIGN_00921
9368 COMPANIES/train/COMPANIES_00740
9368 MIGHT/train/MIGHT_00773
9368 PUBLIC/train/PUBLIC_00563
9368 MORNING/train/MORNING_00585
9368 SYRIA/train/SYRIA_00986
9368 QUESTION/train/QUESTION_00639
9368 OTHER/train/OTHER_00932
9368 SYRIAN/train/SYRIAN_00121
9368 BECAUSE/train/BECAUSE_00040
9368 USING/train/USING_00597
9368 EVENTS/val/EVENTS_00041
9368 COULD/val/COULD_00021
9368 WEEKS/train/WEEKS_00189
9368 SENSE/train/SENSE_00604
9368 ACTUALLY/train/ACTUALLY_00690
9368 TONIGHT/train/TONIGHT_00709
9368 WHOLE/val/WHOLE_00021
9368 HIGHER/train/HIGHER_00502
9438 CAMERON/train/CAMERON_00215
9438 MEETING/train/MEETING_00381
9438 ANNOUNCED/train/ANNOUNCED_00440
9438 WARNING/train/WARNING_00918
9438 UNDER/train/UNDER_00789
9438 SCHOOL/train/SCHOOL_00816
9438 LOOKING/train/LOOKING_00530
9438 WORKERS/train/WORKERS_00997
9438 FOOTBALL/train/FOOTBALL_00686
9438 ASKED/train/ASKED_00385
9438 HEAVY/train/HEAVY_00265
9438 GEORGE/train/GEORGE_00019
9438 SCOTTISH/train/SCOTTISH_00046
9438 EDITOR/train/EDITOR_00580
9438 RECORD/train/RECORD_00563
9438 POSITION/train/POSITION_00864
9438 SPEECH/train/SPEECH_00845
9438 BECOME/train/BECOME_00939
9438 RETURN/train/RETURN_00367
9438 FIRST/train/FIRST_00246
9438 ENGLAND/train/ENGLAND_00232
9438 PATIENTS/train/PATIENTS_00895
9438 ABOUT/train/ABOUT_00218
9438 SOUTHERN/train/SOUTHERN_00021
9438 FAMILY/train/FAMILY_00825
9438 ASKING/train/ASKING_00912
9438 ALLEGATIONS/train/ALLEGATIONS_00455
9438 SITUATION/train/SITUATION_00165
9438 FOOTBALL/train/FOOTBALL_00916
9438 CAMPAIGN/train/CAMPAIGN_00852
9438 GUILTY/train/GUILTY_00025
9438 OTHERS/train/OTHERS_00114
9438 MURDER/train/MURDER_00798
9438 COUNTRIES/train/COUNTRIES_00039
9438 ASKING/train/ASKING_00705
9438 WORLD/train/WORLD_00104
9438 OFFICERS/train/OFFICERS_00996
9438 VOTERS/train/VOTERS_00871
9438 CHANGES/train/CHANGES_00079
9438 ORDER/train/ORDER_00859
9438 CONTINUE/train/CONTINUE_00565
9438 COUNCIL/train/COUNCIL_00561
9438 BENEFIT/train/BENEFIT_00671
9438 ACCORDING/train/ACCORDING_00982
9438 LEVEL/train/LEVEL_00563
9438 PARTIES/train/PARTIES_00158
9438 FURTHER/train/FURTHER_00192
9438 ENERGY/train/ENERGY_00557
9438 CANCER/train/CANCER_00586
9438 LOCAL/train/LOCAL_00343
9438 AFRICA/train/AFRICA_00087
9438 WARNING/train/WARNING_00763
9438 MOMENT/train/MOMENT_00198
9438 CHANGES/test/CHANGES_00024
9438 MILLIONS/train/MILLIONS_00220
9438 MAJOR/train/MAJOR_00417
9438 PARTS/train/PARTS_00629
9438 BANKS/train/BANKS_00176
9438 LABOUR/train/LABOUR_00755
9438 ANNOUNCED/train/ANNOUNCED_00622
9438 POSITION/train/POSITION_00614
9438 ALMOST/train/ALMOST_00805
9438 OBAMA/train/OBAMA_00391
9438 PHONE/train/PHONE_00302
9438 VIOLENCE/train/VIOLENCE_00406
9438 MINISTERS/train/MINISTERS_00019
9438 OFFICERS/train/OFFICERS_00601
9438 COMMUNITY/test/COMMUNITY_00019
9438 ARRESTED/train/ARRESTED_00399
9438 FOUND/train/FOUND_00858
9438 LEVEL/test/LEVEL_00023
9438 ARRESTED/train/ARRESTED_00026
9438 CHIEF/train/CHIEF_00824
9438 DESCRIBED/train/DESCRIBED_00137
9438 MEDICAL/train/MEDICAL_00437
9438 AFFECTED/train/AFFECTED_00790
9438 HOSPITAL/train/HOSPITAL_00719
9438 FAMILY/train/FAMILY_00571
9438 WELFARE/train/WELFARE_00538
9438 FOOTBALL/train/FOOTBALL_00442
9438 RESPONSE/train/RESPONSE_00223
9438 CLOSE/train/CLOSE_00193
9438 GUILTY/train/GUILTY_00047
9438 VICTIMS/train/VICTIMS_00262
9438 RATES/train/RATES_00629
9438 ACTION/train/ACTION_00109
9438 GUILTY/train/GUILTY_00630
9438 PERSONAL/train/PERSONAL_00163
9438 WANTS/train/WANTS_00636
9438 CHANGES/train/CHANGES_00059
9438 FIRST/train/FIRST_00944
9438 CAMPAIGN/train/CAMPAIGN_00483
9438 PHONE/train/PHONE_00550
9438 WINDS/train/WINDS_00840
9438 PARENTS/train/PARENTS_00422
9438 TODAY/train/TODAY_00871
9438 WORLD/train/WORLD_00537
9438 PAYING/train/PAYING_00587
9438 JAMES/train/JAMES_00169
9438 TRYING/train/TRYING_00466
9438 TOWARDS/train/TOWARDS_00693
9438 MILLIONS/train/MILLIONS_00253
9438 WOULD/train/WOULD_00317
9438 COURT/train/COURT_00348
9438 FAMILY/train/FAMILY_00162
9438 EXPECTED/train/EXPECTED_00506
9438 CAMERON/val/CAMERON_00014
9438 OFFICIALS/test/OFFICIALS_00029
9438 CLEAR/train/CLEAR_00150
9438 DEBATE/train/DEBATE_00824
9438 EVENTS/train/EVENTS_00412
9438 FAMILY/train/FAMILY_00521
9438 DEATH/train/DEATH_00610
9438 HUNDREDS/test/HUNDREDS_00016
9438 STREET/train/STREET_00435
9438 NUMBER/train/NUMBER_00087
9438 AMERICAN/train/AMERICAN_00373
9438 SERVICES/train/SERVICES_00665
9438 LEGAL/test/LEGAL_00044
9438 MONTH/train/MONTH_00172
9438 MILLION/train/MILLION_00445
9438 EXTRA/train/EXTRA_00915
9438 WITHIN/train/WITHIN_00478
9438 YESTERDAY/train/YESTERDAY_00086
9438 ACCORDING/train/ACCORDING_00588
9438 RETURN/train/RETURN_00439
9438 STORY/train/STORY_00710
9438 BLACK/train/BLACK_00265
9438 MONTH/train/MONTH_00509
9438 LEAST/train/LEAST_00324
9438 SPEECH/train/SPEECH_00117
9438 AFFAIRS/train/AFFAIRS_00318
9438 SPECIAL/train/SPECIAL_00189
9438 CONFLICT/train/CONFLICT_00112
9438 LEADERS/train/LEADERS_00594
9438 DAVID/train/DAVID_00910
9438 PARTIES/train/PARTIES_00432
9438 UNDER/train/UNDER_00362
9438 MILLIONS/train/MILLIONS_00959
9438 WHOLE/train/WHOLE_00864
9438 LONDON/train/LONDON_00437
9438 CHARGES/train/CHARGES_00398
9438 PRIME/test/PRIME_00005
9438 FORCE/train/FORCE_00243
9438 WHERE/train/WHERE_00848
9438 SECURITY/train/SECURITY_00792
9438 STATEMENT/train/STATEMENT_00847
9438 WATER/train/WATER_00101
9438 UNION/train/UNION_00258
9438 TEMPERATURES/train/TEMPERATURES_00679
9438 COUNTRY/train/COUNTRY_00951
9438 CHIEF/train/CHIEF_00915
9438 THREAT/train/THREAT_00693
9438 QUESTIONS/train/QUESTIONS_00102
9438 CONFERENCE/train/CONFERENCE_00787
9438 STAND/train/STAND_00835
9438 HEART/train/HEART_00779
9438 SECTOR/train/SECTOR_00733
9438 PRISON/train/PRISON_00505
9438 YESTERDAY/train/YESTERDAY_00357
9438 CHIEF/train/CHIEF_00104
9438 EUROPEAN/train/EUROPEAN_00474
9438 WHILE/train/WHILE_00379
9438 FAMILIES/train/FAMILIES_00630
9438 HOSPITAL/train/HOSPITAL_00280
9438 OFFICIALS/train/OFFICIALS_00237
9438 PRESIDENT/train/PRESIDENT_00787
9438 CONTINUE/train/CONTINUE_00413
9438 HOSPITAL/train/HOSPITAL_00766
9438 MISSING/train/MISSING_00627
9438 DEATH/train/DEATH_00858
9438 CHARGES/train/CHARGES_00781
9438 TOMORROW/train/TOMORROW_00440
9438 KILLED/train/KILLED_00277
9438 FINANCIAL/train/FINANCIAL_00320
9438 FOCUS/train/FOCUS_00475
9438 WELCOME/train/WELCOME_00694
9438 MANCHESTER/train/MANCHESTER_00825
9438 MORNING/train/MORNING_00207
9438 CHANGES/train/CHANGES_00921
9438 FAMILY/train/FAMILY_00148
9438 BEING/train/BEING_00953
9438 REPORT/train/REPORT_00080
9438 EASTERN/train/EASTERN_00151
9438 GROUP/train/GROUP_00292
9438 EDITOR/train/EDITOR_00360
9438 ACTION/train/ACTION_00372
9438 PARLIAMENT/train/PARLIAMENT_00209
9438 WHILE/train/WHILE_00263
9438 BANKS/train/BANKS_00930
9438 TALKS/train/TALKS_00449
9438 ELECTION/train/ELECTION_00552
9438 VICTIMS/val/VICTIMS_00012
9438 ENERGY/train/ENERGY_00822
9438 WINDS/train/WINDS_00694
9438 BRITISH/train/BRITISH_00647
9438 LABOUR/train/LABOUR_00523
9438 DETAILS/train/DETAILS_00430
9438 WAITING/train/WAITING_00212
9438 DESPITE/train/DESPITE_00252
9438 THOSE/train/THOSE_00100
9438 SINCE/train/SINCE_00541
9438 HEAVY/train/HEAVY_00128
9438 THIRD/train/THIRD_00532
9438 SPEECH/train/SPEECH_00073
9438 ATTACK/train/ATTACK_00421
9438 FIGURES/test/FIGURES_00023
9438 KNOWN/train/KNOWN_00799
9438 MAKING/train/MAKING_00039
9438 QUESTION/val/QUESTION_00029
9438 CHILDREN/train/CHILDREN_00108
9438 SERVICES/train/SERVICES_00713
9438 PHONE/train/PHONE_00701
9438 AMONG/test/AMONG_00045
9438 STAGE/train/STAGE_00863
9438 BUILDING/test/BUILDING_00013
9438 OFFICIALS/train/OFFICIALS_00363
9438 THIRD/train/THIRD_00195
9438 POWER/train/POWER_00255
9438 BIGGEST/train/BIGGEST_00708
9438 BORDER/train/BORDER_00811
9438 GROWTH/train/GROWTH_00326
9438 UNION/train/UNION_00337
9438 TOMORROW/train/TOMORROW_00658
9438 GIVEN/train/GIVEN_00019
9438 HEARD/train/HEARD_00702
9438 LONGER/train/LONGER_00924
9438 AMOUNT/train/AMOUNT_00206
9438 JAMES/train/JAMES_00327
9438 BENEFITS/train/BENEFITS_00336
9438 LONDON/train/LONDON_00547
9438 THOUGHT/train/THOUGHT_00368
9438 RESULT/train/RESULT_00288
9438 CLAIMS/train/CLAIMS_00591
9438 GIVING/train/GIVING_00034
9438 SOCIAL/train/SOCIAL_00122
9438 RATES/train/RATES_00379
9438 CENTRAL/train/CENTRAL_00169
9438 CUSTOMERS/train/CUSTOMERS_00260
9438 FORMER/train/FORMER_00085
9438 REPORT/train/REPORT_00159
9438 KNOWN/train/KNOWN_00871
9438 SAYING/train/SAYING_00137
9438 DURING/train/DURING_00980
9438 RULES/train/RULES_00421
9438 MEDICAL/train/MEDICAL_00182
9438 DIFFERENCE/train/DIFFERENCE_00185
9438 INDEPENDENT/train/INDEPENDENT_00622
9438 FOREIGN/train/FOREIGN_00209
9438 HEARD/train/HEARD_00628
9438 MILLIONS/train/MILLIONS_00747
9438 ALMOST/train/ALMOST_00554
9438 ATTACK/train/ATTACK_00822
9438 DESCRIBED/train/DESCRIBED_00920
9438 GAMES/train/GAMES_00131
9438 COMES/train/COMES_00378
9438 MONTH/train/MONTH_00833
9438 INSIDE/train/INSIDE_00847
9438 VIOLENCE/train/VIOLENCE_00360
9438 LEVEL/train/LEVEL_00903
9438 CALLED/train/CALLED_00999
9438 GUILTY/train/GUILTY_00624
9438 PRESS/train/PRESS_00818
9438 MANCHESTER/test/MANCHESTER_00033
9438 HUMAN/train/HUMAN_00898
9438 EVENING/train/EVENING_00009
9438 REPORTS/train/REPORTS_00692
9438 OFFICERS/train/OFFICERS_00879
9438 COURT/train/COURT_00739
9438 SOUTHERN/train/SOUTHERN_00834
9438 WANTS/train/WANTS_00639
9438 KILLED/train/KILLED_00832
9438 ALLOWED/train/ALLOWED_00179
9438 AMONG/train/AMONG_00812
9438 RECENT/train/RECENT_00841
9438 CHANGE/train/CHANGE_00224
9438 MIDDLE/train/MIDDLE_00521
9438 STREET/train/STREET_00440
9438 MIDDLE/train/MIDDLE_00744
9438 CHIEF/train/CHIEF_00115
9438 ABSOLUTELY/train/ABSOLUTELY_00297
9438 SENIOR/train/SENIOR_00953
9438 WATER/train/WATER_00595
9438 STORY/train/STORY_00776
9438 CHARGES/train/CHARGES_00762
9438 TRYING/train/TRYING_00306
9438 MEMBERS/train/MEMBERS_00596
9438 FOOTBALL/train/FOOTBALL_00425
9438 MINISTERS/train/MINISTERS_00512
9438 MILLION/train/MILLION_00945
9438 BRITAIN/train/BRITAIN_00588
9438 MIGHT/train/MIGHT_00115
9438 CAMERON/train/CAMERON_00805
9438 ACCORDING/train/ACCORDING_00146
9438 ISLAMIC/train/ISLAMIC_00240
9438 PHONE/train/PHONE_00057
9438 FOREIGN/train/FOREIGN_00716
9438 MILITARY/train/MILITARY_00937
9438 WEEKS/train/WEEKS_00624
9438 ATTACK/train/ATTACK_00851
9438 POLITICIANS/train/POLITICIANS_00037
9438 SCHOOLS/train/SCHOOLS_00709
9438 SPECIAL/train/SPECIAL_00139
9438 REPORT/train/REPORT_00283
9438 MILLIONS/train/MILLIONS_00837
9438 VICTIMS/train/VICTIMS_00930
9438 DESCRIBED/train/DESCRIBED_00153
9438 HEALTH/train/HEALTH_00586
9438 INFLATION/train/INFLATION_00506
9438 SPEECH/train/SPEECH_00243
9438 OFFICIALS/train/OFFICIALS_00009
9438 FOCUS/test/FOCUS_00008
9438 AMERICA/train/AMERICA_00502
9438 EVERY/train/EVERY_00959
9438 THING/train/THING_00057
9438 BROUGHT/train/BROUGHT_00457
9438 COUNTRY/train/COUNTRY_00126
9438 DURING/train/DURING_00917
9438 GROWING/train/GROWING_00943
9438 LEGAL/train/LEGAL_00508
9438 FIRST/train/FIRST_00983
9438 LITTLE/train/LITTLE_00343
9438 MILLIONS/train/MILLIONS_00828
9438 BUILD/train/BUILD_00772
9438 MILLION/train/MILLION_00299
9438 CASES/train/CASES_00165
9438 ANNOUNCED/train/ANNOUNCED_00905
9438 POWER/train/POWER_00537
9438 TRIAL/train/TRIAL_00986
9438 MEMBER/train/MEMBER_00341
9438 SERIES/test/SERIES_00020
9438 HOUSE/test/HOUSE_00022
9438 HOMES/train/HOMES_00748
9438 THIRD/train/THIRD_00206
9438 SPECIAL/train/SPECIAL_00997
9438 COMPANY/train/COMPANY_00239
9438 ACCORDING/train/ACCORDING_00034
9438 COURT/train/COURT_00664
9438 PRICES/train/PRICES_00761
9438 SITUATION/train/SITUATION_00296
9438 USING/train/USING_00713
9438 FACING/train/FACING_00552
9438 LOOKING/train/LOOKING_00083
9438 WORST/train/WORST_00797
9438 ASKING/train/ASKING_00148
9438 WORLD/train/WORLD_00293
9438 FRIDAY/train/FRIDAY_00775
9438 CONFLICT/train/CONFLICT_00785
9438 GUILTY/train/GUILTY_00328
9438 THOSE/train/THOSE_00645
9438 LOOKING/train/LOOKING_00397
9438 UNITED/test/UNITED_00032
9438 AFTERNOON/train/AFTERNOON_00143
9438 TALKS/train/TALKS_00683
9438 ACCUSED/train/ACCUSED_00434
9438 CONTROL/train/CONTROL_00060
9438 CUSTOMERS/train/CUSTOMERS_00368
9438 SERIES/train/SERIES_00712
9438 INFLATION/train/INFLATION_00670
9438 WORKERS/train/WORKERS_00351
9438 STAFF/train/STAFF_00231
9438 MONTHS/train/MONTHS_00993
9438 THOUGHT/train/THOUGHT_00429
9438 COMPANY/train/COMPANY_00212
9438 CONTINUE/train/CONTINUE_00738
9438 ORDER/train/ORDER_00256
9438 CHANGES/train/CHANGES_00934
9438 FINANCIAL/train/FINANCIAL_00494
9438 MEETING/train/MEETING_00945
9438 COMPANY/train/COMPANY_00603
9438 CLAIMS/train/CLAIMS_00233
9438 LEAVE/train/LEAVE_00954
9438 DURING/train/DURING_00595
9438 BIGGEST/train/BIGGEST_00330
9438 INDEPENDENT/train/INDEPENDENT_00024
9438 MONTH/train/MONTH_00138
9438 OFFICERS/train/OFFICERS_00245
9438 LIVING/train/LIVING_00575
9438 FIGURES/train/FIGURES_00440
9438 ABOUT/train/ABOUT_00072
9438 RECENT/train/RECENT_00767
9438 COURT/train/COURT_00250
9438 UNDER/train/UNDER_00452
9438 COURT/train/COURT_00367
9438 SPENT/train/SPENT_00374
9438 BEING/train/BEING_00369
9438 SCOTTISH/train/SCOTTISH_00215
9438 EDITOR/test/EDITOR_00005
9438 SERVICE/train/SERVICE_00417
9438 WORKERS/train/WORKERS_00539
9438 SECURITY/train/SECURITY_00291
9438 WANTS/train/WANTS_00273
9438 FORCE/train/FORCE_00976
9438 PRESSURE/train/PRESSURE_00614
9438 POSSIBLE/train/POSSIBLE_00400
9438 COUNTRY/train/COUNTRY_00469
9438 SENSE/train/SENSE_00775
9438 WOMEN/train/WOMEN_00077
9438 HOSPITAL/train/HOSPITAL_00970
9438 OFFICERS/train/OFFICERS_00004
9438 SPEAKING/train/SPEAKING_00178
9438 RECENT/train/RECENT_00770
9438 TODAY/train/TODAY_00017
9438 INVESTMENT/train/INVESTMENT_00532
9438 LEAST/train/LEAST_00817
9438 GEORGE/train/GEORGE_00135
9438 CHANGE/train/CHANGE_00747
9438 MEMBER/train/MEMBER_00296
9438 WHILE/train/WHILE_00427
9438 INDUSTRY/train/INDUSTRY_00221
9438 MISSING/train/MISSING_00710
9438 MEDICAL/train/MEDICAL_00332
9438 REPORT/train/REPORT_00880
9438 UNION/train/UNION_00062
9438 BETTER/train/BETTER_00343
9438 AGAINST/train/AGAINST_00938
9438 SHORT/train/SHORT_00011
9438 QUESTIONS/train/QUESTIONS_00046
9438 SINCE/train/SINCE_00882
9438 BUDGET/train/BUDGET_00195
9438 SIDES/train/SIDES_00774
9438 PRISON/train/PRISON_00053
9438 PERSON/train/PERSON_00683
9438 CAPITAL/train/CAPITAL_00053
9438 SECTOR/train/SECTOR_00575
9438 UNDER/train/UNDER_00271
9438 HEAVY/train/HEAVY_00378
9438 SOCIAL/train/SOCIAL_00551
9438 SEVERAL/train/SEVERAL_00084
9438 OPERATION/train/OPERATION_00800
9438 FIRST/train/FIRST_00662
9438 SPENDING/train/SPENDING_00709
9438 SYRIAN/train/SYRIAN_00025
9438 WEAPONS/test/WEAPONS_00038
9438 LIVING/train/LIVING_00820
9438 AMERICA/test/AMERICA_00049
9438 INFORMATION/train/INFORMATION_00370
9438 LEADER/train/LEADER_00261
9438 MAJOR/train/MAJOR_00481
9438 HUNDREDS/train/HUNDREDS_00574
9438 WHILE/train/WHILE_00356
9438 MILLIONS/train/MILLIONS_00051
9438 SAYING/train/SAYING_00939
9438 WINDS/train/WINDS_00839
9438 ATTACK/train/ATTACK_00035
9438 FORMER/train/FORMER_00888
9438 COMPANY/train/COMPANY_00149
9438 TALKS/train/TALKS_00498
9438 GOVERNMENT/train/GOVERNMENT_00246
9438 NUMBER/train/NUMBER_00112
9438 SIMPLY/train/SIMPLY_00779
9438 MEDIA/train/MEDIA_00063
9438 FRANCE/train/FRANCE_00678
9438 WORKING/train/WORKING_00824
9438 REPORTS/train/REPORTS_00065
9438 UNITED/train/UNITED_00522
9438 AGREE/train/AGREE_00396
9438 BRITAIN/train/BRITAIN_00059
9438 WHERE/train/WHERE_00148
9438 TRIAL/test/TRIAL_00008
9438 EVENING/train/EVENING_00894
9438 HEAVY/train/HEAVY_00006
9438 SHORT/train/SHORT_00564
9438 FAMILIES/train/FAMILIES_00152
9438 LATER/train/LATER_00081
9438 CHIEF/train/CHIEF_00665
9438 SYRIA/train/SYRIA_00336
9438 ALLEGATIONS/train/ALLEGATIONS_00422
9438 BENEFIT/train/BENEFIT_00954
9438 ACCESS/train/ACCESS_00164
9438 THREAT/train/THREAT_00986
9438 SOUTH/val/SOUTH_00009
9438 CANNOT/test/CANNOT_00008
9438 TONIGHT/test/TONIGHT_00017
9438 FINANCIAL/train/FINANCIAL_00316
9438 ARRESTED/train/ARRESTED_00732
9438 DESPITE/train/DESPITE_00249
9438 TOMORROW/train/TOMORROW_00869
9438 FORMER/train/FORMER_00447
9438 USING/train/USING_00449
9438 SITUATION/train/SITUATION_00302
9438 MILLION/train/MILLION_00653
9438 DURING/train/DURING_00468
9438 LOOKING/train/LOOKING_00277
9438 MAJOR/train/MAJOR_00774
9438 RECORD/train/RECORD_00735
9438 DURING/train/DURING_00074
9438 DESPITE/train/DESPITE_00864
9438 INQUIRY/train/INQUIRY_00796
9438 EDUCATION/train/EDUCATION_00450
9438 KILLED/train/KILLED_00800
9438 THEMSELVES/train/THEMSELVES_00984
9438 MEMBER/train/MEMBER_00281
9438 COURT/train/COURT_00582
9438 LATER/train/LATER_00455
9438 MEANS/train/MEANS_00530
9438 FORMER/train/FORMER_00399
9438 SIMPLY/train/SIMPLY_00981
9438 LONDON/train/LONDON_00521
9438 DURING/train/DURING_00597
9438 BRITAIN/train/BRITAIN_00032
9438 AGAINST/train/AGAINST_00177
9438 ELECTION/train/ELECTION_00296
9438 TONIGHT/train/TONIGHT_00734
9438 LEVEL/train/LEVEL_00960
9438 BETWEEN/train/BETWEEN_00244
9438 EDITOR/train/EDITOR_00186
9438 SECOND/train/SECOND_00096
9438 STORY/train/STORY_00496
9438 SCOTTISH/train/SCOTTISH_00230
9438 ATTACK/train/ATTACK_00908
9438 SERIES/train/SERIES_00540
9438 WRONG/train/WRONG_00393
9438 UNTIL/train/UNTIL_00692
9438 BROUGHT/train/BROUGHT_00968
9438 CHILD/train/CHILD_00821
9438 ATTACKS/train/ATTACKS_00488
9438 POLICE/train/POLICE_00764
9438 STATEMENT/train/STATEMENT_00559
9438 MEDICAL/train/MEDICAL_00250
9438 PARTIES/train/PARTIES_00075
9438 TONIGHT/train/TONIGHT_00801
9438 WHETHER/train/WHETHER_00943
9438 COURT/train/COURT_00734
9438 MILLION/train/MILLION_00553
9438 BUILDING/train/BUILDING_00849
9438 FORWARD/train/FORWARD_00598
9438 LITTLE/train/LITTLE_00505
9438 LATEST/train/LATEST_00844
9438 CALLED/train/CALLED_00283
9438 MINISTER/train/MINISTER_00139
9438 ACCUSED/test/ACCUSED_00020
9438 ACCORDING/train/ACCORDING_00678
9438 MONTH/train/MONTH_00319
9438 FINAL/train/FINAL_00912
9438 PRESS/train/PRESS_00290
9438 GUILTY/train/GUILTY_00654
9438 FORMER/train/FORMER_00196
9438 SUNDAY/train/SUNDAY_00400
9438 PLANS/train/PLANS_00469
9438 LEAST/train/LEAST_00059
9438 SYSTEM/test/SYSTEM_00034
9438 EXPECTED/train/EXPECTED_00816
9438 LONDON/train/LONDON_00606
9438 FRANCE/train/FRANCE_00695
9438 ARRESTED/train/ARRESTED_00156
9438 SINCE/test/SINCE_00043
9438 EDITOR/test/EDITOR_00028
9438 WHICH/train/WHICH_00969
9438 UNDER/train/UNDER_00829
9438 LATEST/train/LATEST_00110
9438 MEDIA/train/MEDIA_00633
9438 PARTY/train/PARTY_00554
9438 INQUIRY/train/INQUIRY_00795
9438 SCOTTISH/train/SCOTTISH_00755
9438 LATEST/train/LATEST_00445
9438 CANCER/train/CANCER_00498
9438 ABUSE/train/ABUSE_00153
9438 SPENT/train/SPENT_00443
9438 RECENT/train/RECENT_00844
9438 LOOKING/train/LOOKING_00999
9438 BRING/train/BRING_00375
9438 ATTACKS/train/ATTACKS_00795
9438 HUMAN/train/HUMAN_00705
9438 LEADER/train/LEADER_00265
9438 SCOTLAND/val/SCOTLAND_00046
9438 FORCE/train/FORCE_00038
9438 WELCOME/train/WELCOME_00156
9438 WARNING/train/WARNING_00929
9438 PUBLIC/train/PUBLIC_00586
9438 THIRD/train/THIRD_00662
9438 AFFAIRS/train/AFFAIRS_00903
9438 PERSON/train/PERSON_00883
9438 RULES/train/RULES_00482
9438 GROWING/train/GROWING_00319
9438 MIGRANTS/train/MIGRANTS_00813
9438 DURING/train/DURING_00986
9438 MURDER/train/MURDER_00213
9438 GEORGE/train/GEORGE_00738
9438 EVENING/train/EVENING_00563
9438 FOOTBALL/train/FOOTBALL_00708
9438 FACING/train/FACING_00707
9438 AMONG/train/AMONG_00331
9438 COMING/train/COMING_00606
9438 AFTERNOON/train/AFTERNOON_00707
9438 ARRESTED/train/ARRESTED_00407
9438 MANCHESTER/train/MANCHESTER_00336
9438 TAKEN/train/TAKEN_00330
9438 GIVING/train/GIVING_00520
9438 MURDER/train/MURDER_00130
9438 WESTERN/train/WESTERN_00168
9438 SECURITY/train/SECURITY_00417
9438 FURTHER/train/FURTHER_00463
9438 IRELAND/train/IRELAND_00749
9438 STATEMENT/train/STATEMENT_00347
9438 GEORGE/train/GEORGE_00391
9438 ALLOWED/train/ALLOWED_00801
9438 DETAILS/train/DETAILS_00095
9438 OFFICERS/train/OFFICERS_00433
9438 RIGHTS/train/RIGHTS_00811
9438 MIGHT/train/MIGHT_00492
9438 DESCRIBED/train/DESCRIBED_00772
9438 ACCORDING/train/ACCORDING_00305
9438 INDUSTRY/train/INDUSTRY_00825
9438 INFORMATION/train/INFORMATION_00440
9438 SECRETARY/train/SECRETARY_00278
9438 RUNNING/test/RUNNING_00007
9438 SEVEN/train/SEVEN_00453
9438 LIVES/train/LIVES_00872
9438 EDITOR/train/EDITOR_00151
9438 CHIEF/train/CHIEF_00228
9438 OFFICIALS/train/OFFICIALS_00857
9438 SPEAKING/train/SPEAKING_00507
9438 RECORD/train/RECORD_00703
9438 MILITARY/train/MILITARY_00976
9438 FIGURES/train/FIGURES_00865
9438 INSIDE/train/INSIDE_00570
9438 MILITARY/train/MILITARY_00212
9438 BUSINESS/train/BUSINESS_00806
9438 UNITED/train/UNITED_00924
9438 BEFORE/train/BEFORE_00820
9438 SCHOOLS/train/SCHOOLS_00590
9438 INFORMATION/train/INFORMATION_00164
9438 THOUSANDS/train/THOUSANDS_00468
9438 PHONE/train/PHONE_00618
9438 HEALTH/train/HEALTH_00235
9438 FACING/train/FACING_00167
9438 SCHOOLS/train/SCHOOLS_00199
9438 EUROPEAN/train/EUROPEAN_00387
9438 POSSIBLE/train/POSSIBLE_00900
9438 ABUSE/test/ABUSE_00028
9438 OFFICIALS/train/OFFICIALS_00667
9438 CANCER/train/CANCER_00428
9438 OFFICERS/train/OFFICERS_00142
9438 EVENING/train/EVENING_00061
9438 BETWEEN/train/BETWEEN_00063
9438 FOUND/train/FOUND_00477
9438 ALLOW/train/ALLOW_00267
9438 LEVEL/train/LEVEL_00413
9438 FORMER/train/FORMER_00860
9438 CERTAINLY/train/CERTAINLY_00049
9438 INVOLVED/train/INVOLVED_00483
9438 STATES/train/STATES_00841
9438 WELCOME/train/WELCOME_00460
9438 KILLED/train/KILLED_00173
9438 CALLED/train/CALLED_00841
9438 SYRIAN/train/SYRIAN_00394
9438 HEARD/train/HEARD_00298
9438 WEATHER/train/WEATHER_00794
9438 LEVELS/train/LEVELS_00159
9438 GAMES/train/GAMES_00870
9438 PRESIDENT/train/PRESIDENT_00454
9438 NIGHT/train/NIGHT_00161
9438 INDUSTRY/train/INDUSTRY_00773
9438 MEDICAL/train/MEDICAL_00670
9438 ALLOW/train/ALLOW_00320
9438 EMERGENCY/train/EMERGENCY_00627
9438 JAMES/train/JAMES_00543
9438 ACCUSED/train/ACCUSED_00854
9438 SYRIAN/train/SYRIAN_00462
9438 GROUP/train/GROUP_00663
9438 ENGLAND/train/ENGLAND_00050
9438 HUMAN/train/HUMAN_00591
9438 JAMES/train/JAMES_00324
9438 SYRIAN/train/SYRIAN_00132
9438 CONTINUE/train/CONTINUE_00457
9438 ALREADY/train/ALREADY_00715
9438 EMERGENCY/train/EMERGENCY_00354
9438 SERIOUS/train/SERIOUS_00778
9438 FOOTBALL/train/FOOTBALL_00023
9438 AFFAIRS/train/AFFAIRS_00717
9438 LEAVE/test/LEAVE_00005
9438 ACCESS/train/ACCESS_00566
9438 UNDER/train/UNDER_00886
9438 TONIGHT/train/TONIGHT_00466
9438 ASKED/train/ASKED_00122
9438 CHARGES/train/CHARGES_00690
9438 EDITOR/train/EDITOR_00955
9438 CAMERON/train/CAMERON_00743
9438 INDUSTRY/train/INDUSTRY_00161
9438 MOMENT/train/MOMENT_00102
9438 WANTS/train/WANTS_00365
9438 WITHOUT/train/WITHOUT_00696
9438 ALLEGATIONS/train/ALLEGATIONS_00760
9438 WORKERS/train/WORKERS_00182
9438 AGAIN/train/AGAIN_00253
9438 POWER/train/POWER_00029
9438 HIGHER/train/HIGHER_00605
9438 AFTER/train/AFTER_00546
9438 SEVERAL/train/SEVERAL_00100
9438 RUNNING/train/RUNNING_00659
9438 CHIEF/train/CHIEF_00836
9438 DURING/train/DURING_00579
9438 UNION/train/UNION_00805
9438 GETTING/train/GETTING_00777
9438 DESPITE/train/DESPITE_00349
9438 WHETHER/train/WHETHER_00706
9438 FINAL/train/FINAL_00545
9438 PROBLEMS/train/PROBLEMS_00481
9438 POLICE/train/POLICE_00720
9438 WHOLE/train/WHOLE_00881
9438 SIGNIFICANT/train/SIGNIFICANT_00623
9438 THEIR/train/THEIR_00204
9438 WELCOME/train/WELCOME_00377
9438 HOSPITAL/train/HOSPITAL_00698
9438 CHANGE/train/CHANGE_00734
9438 SECURITY/train/SECURITY_00222
9438 WORST/train/WORST_00078
9438 EXAMPLE/train/EXAMPLE_00014
9438 GOVERNMENT/train/GOVERNMENT_00832
9438 ACTION/train/ACTION_00649
9438 ALLOWED/train/ALLOWED_00597
9438 FRONT/train/FRONT_00357
9438 EDITOR/train/EDITOR_00363
9438 PARENTS/test/PARENTS_00034
9438 STRONG/train/STRONG_00329
9438 EVENING/val/EVENING_00033
9438 PROBLEM/train/PROBLEM_00409
9438 INDUSTRY/train/INDUSTRY_00871
9438 YESTERDAY/train/YESTERDAY_00931
9438 MAJOR/train/MAJOR_00671
9438 WORDS/train/WORDS_00157
9438 OFFICERS/train/OFFICERS_00579
9438 EDITOR/train/EDITOR_00266
9438 LEADERS/train/LEADERS_00205
9438 SOUTH/train/SOUTH_00467
9438 HUNDREDS/train/HUNDREDS_00511
9438 COULD/train/COULD_00432
9438 THREAT/train/THREAT_00720
9438 FACING/train/FACING_00283
9438 ATTACK/train/ATTACK_00693
9438 COULD/train/COULD_00161
9438 THOSE/train/THOSE_00092
9438 SECRETARY/train/SECRETARY_00193
9438 TONIGHT/train/TONIGHT_00975
9438 HOUSING/train/HOUSING_00290
9438 GREAT/train/GREAT_00575
9438 NORTHERN/train/NORTHERN_00909
9438 PRESSURE/train/PRESSURE_00305
9438 BUSINESS/test/BUSINESS_00028
9438 ASKING/train/ASKING_00937
9438 INQUIRY/train/INQUIRY_00582
9438 TRIAL/train/TRIAL_00718
9438 WEEKS/val/WEEKS_00028
9438 SECRETARY/test/SECRETARY_00047
9438 MANCHESTER/train/MANCHESTER_00673
9438 FINAL/train/FINAL_00718
9438 MINUTES/train/MINUTES_00041
9438 DEFICIT/train/DEFICIT_00232
9438 LEADER/train/LEADER_00338
9438 UNDER/train/UNDER_00538
9438 CHINA/train/CHINA_00340
9438 SIMPLY/train/SIMPLY_00281
9438 INQUIRY/train/INQUIRY_00974
9438 GROWTH/train/GROWTH_00704
9438 POLICY/train/POLICY_00827
9438 BROUGHT/train/BROUGHT_00150
9438 MANCHESTER/train/MANCHESTER_00733
9438 MEASURES/train/MEASURES_00380
9438 FOLLOWING/train/FOLLOWING_00554
9438 STATEMENT/train/STATEMENT_00103
9438 HEART/train/HEART_00191
9438 STORY/train/STORY_00477
9438 THOUSANDS/train/THOUSANDS_00543
9438 HOSPITAL/train/HOSPITAL_00547
9438 CHANGE/train/CHANGE_00255
9438 WELFARE/train/WELFARE_00709
9438 INVESTMENT/train/INVESTMENT_00333
9438 SPENT/train/SPENT_00305
9438 CRISIS/train/CRISIS_00768
9438 RETURN/test/RETURN_00018
9438 JUDGE/train/JUDGE_00741
9438 BRITISH/train/BRITISH_00458
9438 VICTIMS/train/VICTIMS_00161
9438 TIMES/train/TIMES_00438
9438 GAMES/train/GAMES_00003
9438 CHILD/train/CHILD_00425
9438 DESCRIBED/train/DESCRIBED_00270
9438 SCOTLAND/train/SCOTLAND_00516
9438 MILITARY/train/MILITARY_00500
9438 ECONOMY/train/ECONOMY_00733
9438 ASKED/train/ASKED_00284
9438 DEATH/train/DEATH_00818
9438 PRESIDENT/train/PRESIDENT_00982
9438 WHILE/train/WHILE_00815
9438 WANTED/train/WANTED_00047
9438 DESCRIBED/train/DESCRIBED_00266
9438 ACTION/train/ACTION_00133
9438 FAMILY/test/FAMILY_00019
9438 ECONOMIC/train/ECONOMIC_00865
9438 PRIME/train/PRIME_00597
9438 MILLIONS/train/MILLIONS_00525
9438 BEHIND/train/BEHIND_00474
9438 DAVID/train/DAVID_00533
9438 HISTORY/train/HISTORY_00214
9438 VICTIMS/train/VICTIMS_00361
9438 BUSINESSES/train/BUSINESSES_00817
9438 HISTORY/train/HISTORY_00719
9438 CANCER/train/CANCER_00669
9438 DECIDED/train/DECIDED_00697
9438 GAMES/train/GAMES_00225
9438 DEATH/train/DEATH_00185
9438 WALES/train/WALES_00580
9438 CHILD/train/CHILD_00314
9438 AFTERNOON/train/AFTERNOON_00510
9438 HEALTH/train/HEALTH_00091
9438 TAKING/train/TAKING_00140
9438 FIGHT/train/FIGHT_00956
9438 COULD/train/COULD_00322
9438 SPECIAL/train/SPECIAL_00439
9438 GROWING/train/GROWING_00269
9438 HOUSING/train/HOUSING_00947
9438 REPORT/train/REPORT_00971
9438 COMPANY/train/COMPANY_00461
9438 RUNNING/train/RUNNING_00698
9438 SPENDING/train/SPENDING_00768
9438 FUTURE/train/FUTURE_00362
9438 INDEPENDENT/train/INDEPENDENT_00494
9438 BRITAIN/test/BRITAIN_00030
9438 UNION/train/UNION_00563
9438 SPEAKING/train/SPEAKING_00297
9438 IMPACT/train/IMPACT_00918
9438 INVESTMENT/train/INVESTMENT_00677
9438 PARTY/train/PARTY_00230
9438 WHICH/train/WHICH_00570
9438 IMMIGRATION/train/IMMIGRATION_00046
9438 ANNOUNCED/train/ANNOUNCED_00064
9438 PAYING/train/PAYING_00688
9438 AFTER/train/AFTER_00842
9438 EDITOR/train/EDITOR_00194
9438 WITHOUT/train/WITHOUT_00085
9438 ATTACKS/train/ATTACKS_00233
9438 KNOWN/train/KNOWN_00360
9438 MONEY/train/MONEY_00883
9438 LONDON/train/LONDON_00030
9438 MINISTER/train/MINISTER_00901
9438 SUNDAY/train/SUNDAY_00147
9438 MONTHS/train/MONTHS_00829
9438 MONEY/test/MONEY_00018
9438 BUDGET/train/BUDGET_00653
9438 PRICES/test/PRICES_00050
9438 PRIME/train/PRIME_00446
9438 AUTHORITIES/train/AUTHORITIES_00654
9438 DETAILS/train/DETAILS_00210
9438 TALKS/train/TALKS_00462
9438 PERHAPS/train/PERHAPS_00312
9438 DECISION/train/DECISION_00777
9438 MISSING/train/MISSING_00340
9438 FRIDAY/train/FRIDAY_00911
9438 DIFFERENCE/train/DIFFERENCE_00760
9438 POWER/train/POWER_00864
9438 CHARGES/train/CHARGES_00017
9438 YEARS/train/YEARS_00235
9438 CLEAR/train/CLEAR_00586
9438 STAND/test/STAND_00033
9438 GIVEN/train/GIVEN_00800
9438 GEORGE/train/GEORGE_00869
9438 BRITAIN/train/BRITAIN_00982
9438 SOCIAL/train/SOCIAL_00680
9438 CONFERENCE/train/CONFERENCE_00648
9438 POLITICAL/train/POLITICAL_00843
9438 INCREASE/train/INCREASE_00220
9438 LONGER/train/LONGER_00878
9438 ABUSE/train/ABUSE_00241
9438 REPORTS/val/REPORTS_00037
9438 MISSING/train/MISSING_00152
9438 BRITAIN/train/BRITAIN_00636
9438 HOSPITAL/train/HOSPITAL_00595
9438 MONTH/train/MONTH_00793
9438 CHIEF/train/CHIEF_00194
9438 RETURN/train/RETURN_00303
9438 MANCHESTER/train/MANCHESTER_00547
9438 MEDICAL/test/MEDICAL_00012
9438 GERMANY/train/GERMANY_00706
9438 WORST/train/WORST_00722
9438 WARNING/train/WARNING_00902
9438 JUDGE/train/JUDGE_00218
9438 SECRETARY/train/SECRETARY_00963
9438 SIDES/train/SIDES_00237
9438 UNITED/train/UNITED_00443
9438 CHANGES/train/CHANGES_00210
9438 WAITING/train/WAITING_00563
9438 TALKS/train/TALKS_00336
9438 ALLOWED/train/ALLOWED_00614
9438 ANOTHER/train/ANOTHER_00965
9438 TONIGHT/train/TONIGHT_00422
9438 TODAY/train/TODAY_00130
9438 GOVERNMENT/train/GOVERNMENT_00367
9438 ALLOWED/train/ALLOWED_00753
9438 LATER/train/LATER_00701
9438 THREE/train/THREE_00302
9438 MILLIONS/train/MILLIONS_00524
9438 MASSIVE/train/MASSIVE_00182
9438 THEMSELVES/train/THEMSELVES_00404
9438 SEVEN/train/SEVEN_00403
9438 ECONOMIC/train/ECONOMIC_00175
9438 GREAT/train/GREAT_00796
9438 BROUGHT/train/BROUGHT_00650
9438 SECRETARY/train/SECRETARY_00576
9438 WEATHER/train/WEATHER_00564
9438 OFFICERS/train/OFFICERS_00643
9438 ALWAYS/train/ALWAYS_00683
9438 THERE/train/THERE_00235
9438 CHIEF/train/CHIEF_00079
9438 SOUTHERN/train/SOUTHERN_00874
9438 ANOTHER/train/ANOTHER_00354
9438 OUTSIDE/train/OUTSIDE_00417
9438 JAMES/train/JAMES_00334
9438 WHOLE/train/WHOLE_00592
9438 WEAPONS/train/WEAPONS_00981
9438 PHONE/train/PHONE_00561
9438 SMALL/train/SMALL_00493
9438 EXPECT/train/EXPECT_00128
9438 POWER/train/POWER_00077
9438 JAMES/train/JAMES_00681
9438 WORST/train/WORST_00020
9438 REPORTS/train/REPORTS_00477
9438 BRITISH/train/BRITISH_00949
9438 MEASURES/train/MEASURES_00238
9438 FORCES/train/FORCES_00097
9438 MEETING/train/MEETING_00380
9438 EXAMPLE/train/EXAMPLE_00279
9438 RECORD/train/RECORD_00014
9438 FUTURE/train/FUTURE_00757
9438 HOMES/train/HOMES_00734
9438 JAMES/train/JAMES_00473
9438 SECURITY/train/SECURITY_00168
9438 GUILTY/train/GUILTY_00714
9438 TALKS/train/TALKS_00716
9438 WELFARE/train/WELFARE_00713
9438 LEVEL/train/LEVEL_00261
9438 CONFLICT/train/CONFLICT_00612
9438 MILLION/train/MILLION_00647
9438 FURTHER/train/FURTHER_00286
9438 AGREEMENT/train/AGREEMENT_00819
9438 EVIDENCE/train/EVIDENCE_00730
9438 FINAL/train/FINAL_00215
9438 FORCES/train/FORCES_00175
9438 PLANS/train/PLANS_00737
9438 INVESTMENT/train/INVESTMENT_00382
9438 LOCAL/train/LOCAL_00025
9438 UNION/train/UNION_00896
9438 FOLLOWING/train/FOLLOWING_00495
9438 MINISTER/train/MINISTER_00570
9438 POLICY/train/POLICY_00553
9438 NUMBER/train/NUMBER_00910
9438 ENGLAND/train/ENGLAND_00401
9438 WEAPONS/train/WEAPONS_00582
9438 MURDER/train/MURDER_00787
9438 PRIVATE/train/PRIVATE_00138
9438 EDITOR/train/EDITOR_00690
9438 STORY/train/STORY_00401
9438 HISTORY/train/HISTORY_00452
9438 MEMBERS/train/MEMBERS_00624
9438 SINCE/train/SINCE_00729
9438 PROVIDE/test/PROVIDE_00021
9438 EDITOR/train/EDITOR_00593
9438 WELCOME/train/WELCOME_00562
9438 THREAT/train/THREAT_00263
9438 CAPITAL/train/CAPITAL_00749
9438 FINANCIAL/train/FINANCIAL_00769
9438 BENEFIT/train/BENEFIT_00979
9438 STILL/train/STILL_00398
9438 MINISTER/train/MINISTER_00931
9438 NORTHERN/train/NORTHERN_00637
9438 HEART/train/HEART_00447
9438 ALMOST/train/ALMOST_00742
9438 CRISIS/train/CRISIS_00022
9438 JUDGE/train/JUDGE_00696
9438 TAKEN/train/TAKEN_00077
9438 EDITOR/train/EDITOR_00107
9438 SUNDAY/train/SUNDAY_00823
9438 MEDICAL/train/MEDICAL_00160
9438 SYRIAN/train/SYRIAN_00584
9438 PRICE/train/PRICE_00278
9438 ASKING/train/ASKING_00621
9438 SCOTTISH/train/SCOTTISH_00376
9438 CUSTOMERS/train/CUSTOMERS_00513
9438 REPORT/train/REPORT_00933
9438 ECONOMY/train/ECONOMY_00688
9438 WITHOUT/train/WITHOUT_00344
9438 CHARGES/train/CHARGES_00964
9438 NATIONAL/train/NATIONAL_00291
9438 AUTHORITIES/train/AUTHORITIES_00641
9438 GAMES/train/GAMES_00266
9438 ENGLAND/train/ENGLAND_00367
9438 LONDON/train/LONDON_00980
9438 SOUTH/train/SOUTH_00758
9438 OFFICERS/train/OFFICERS_00214
9438 CAMERON/test/CAMERON_00034
9438 FIGHT/train/FIGHT_00680
9438 SIMPLY/train/SIMPLY_00669
9438 WITHIN/train/WITHIN_00743
9438 SPEAKING/train/SPEAKING_00635
9438 OFFICIALS/train/OFFICIALS_00467
9438 WITHIN/train/WITHIN_00809
9438 FAMILIES/train/FAMILIES_00292
9438 JUDGE/train/JUDGE_00634
9438 WRONG/train/WRONG_00355
9438 EVERY/test/EVERY_00017
9438 MILLIONS/train/MILLIONS_00340
9438 FOUND/train/FOUND_00487
9438 HOMES/train/HOMES_00102
9438 LATEST/train/LATEST_00476
9438 SECTOR/train/SECTOR_00039
9438 SPEAKING/train/SPEAKING_00400
9438 EDITOR/train/EDITOR_00623
9438 KILLED/train/KILLED_00561
9438 MEMBERS/test/MEMBERS_00050
9438 COURT/train/COURT_00907
9438 STATEMENT/train/STATEMENT_00930
9438 LONDON/train/LONDON_00809
9438 ALMOST/train/ALMOST_00156
9438 LIKELY/train/LIKELY_00457
9438 POLICE/train/POLICE_00180
9438 SYRIAN/train/SYRIAN_00732
9438 VIOLENCE/train/VIOLENCE_00519
9438 ANSWER/train/ANSWER_00411
9438 BIGGEST/train/BIGGEST_00047
9438 FIGURES/train/FIGURES_00834
9438 FORMER/train/FORMER_00736
9438 MONTHS/train/MONTHS_00929
9438 TRIAL/train/TRIAL_00587
9438 DOING/train/DOING_00842
9438 FORCES/train/FORCES_00427
9438 PRESSURE/train/PRESSURE_00011
9438 ENGLAND/train/ENGLAND_00582
9438 HOSPITAL/train/HOSPITAL_00937
9438 FINANCIAL/train/FINANCIAL_00023
9438 HUNDREDS/train/HUNDREDS_00051
9438 BEFORE/train/BEFORE_00519
9438 VIOLENCE/train/VIOLENCE_00215
9438 BILLION/train/BILLION_00426
9438 SPEND/train/SPEND_00285
9438 SPENT/train/SPENT_00609
9438 ACCORDING/train/ACCORDING_00332
9438 SIDES/train/SIDES_00218
9438 DEATH/train/DEATH_00573
9438 FIRST/train/FIRST_00554
9438 ECONOMIC/train/ECONOMIC_00493
9438 CRISIS/train/CRISIS_00370
9438 SYRIAN/train/SYRIAN_00541
9438 TALKS/test/TALKS_00046
9438 AFFAIRS/val/AFFAIRS_00046
9438 SPEECH/train/SPEECH_00366
9438 ENGLAND/train/ENGLAND_00339
9438 PLANS/train/PLANS_00466
9438 CAPITAL/train/CAPITAL_00938
9438 WORKERS/train/WORKERS_00512
9438 GERMANY/train/GERMANY_00737
9438 CONCERNS/train/CONCERNS_00461
9438 GOVERNMENT/train/GOVERNMENT_00221
9438 START/train/START_00759
9438 SINCE/train/SINCE_00659
9438 STAGE/train/STAGE_00798
9438 FINAL/train/FINAL_00735
9438 ASKING/train/ASKING_00822
9438 PERSONAL/train/PERSONAL_00641
9438 HUNDREDS/train/HUNDREDS_00542
9438 FORCES/train/FORCES_00945
9438 EUROPE/train/EUROPE_00534
9438 PERIOD/train/PERIOD_00084
9438 OPERATION/train/OPERATION_00059
9438 BENEFITS/train/BENEFITS_00745
9438 CRISIS/train/CRISIS_00176
9438 TONIGHT/train/TONIGHT_00354
9438 RATES/train/RATES_00749
9438 THREAT/train/THREAT_00963
9438 WHILE/train/WHILE_00253
9438 WORKERS/train/WORKERS_00188
9438 FOUND/train/FOUND_00954
9438 HOUSE/train/HOUSE_00367
9438 START/train/START_00627
9438 ARRESTED/train/ARRESTED_00845
9438 CONCERNS/train/CONCERNS_00712
9438 SINCE/train/SINCE_00011
9438 ECONOMY/train/ECONOMY_00391
9438 ANNOUNCED/train/ANNOUNCED_00535
9438 THROUGH/train/THROUGH_00669
9438 THROUGH/train/THROUGH_00198
9438 FORCE/train/FORCE_00519
9438 HEARD/train/HEARD_00136
9438 COMMUNITY/train/COMMUNITY_00352
9438 WORKERS/train/WORKERS_00526
9438 PATIENTS/train/PATIENTS_00681
9438 ENGLAND/train/ENGLAND_00205
9438 PLACES/train/PLACES_00358
9438 TRIAL/train/TRIAL_00382
9438 GIVING/train/GIVING_00951
9438 SINCE/train/SINCE_00688
9438 CENTRAL/train/CENTRAL_00235
9438 TOGETHER/train/TOGETHER_00304
9438 HOUSING/train/HOUSING_00845
9438 SECRETARY/train/SECRETARY_00215
9438 ALREADY/train/ALREADY_00646
9438 LEADER/train/LEADER_00837
9438 BETWEEN/train/BETWEEN_00348
9438 EUROPE/train/EUROPE_00857
9438 CRIME/train/CRIME_00856
9438 SECTOR/train/SECTOR_00796
9438 FOREIGN/train/FOREIGN_00321
9438 STAGE/train/STAGE_00670
9438 BANKS/train/BANKS_00517
9438 THIRD/train/THIRD_00928
9438 WORST/train/WORST_00438
9438 PRESSURE/train/PRESSURE_00631
9438 FIGURES/train/FIGURES_00151
9438 ARRESTED/train/ARRESTED_00703
9438 DECIDED/test/DECIDED_00016
9438 LEADERS/train/LEADERS_00476
9438 SAYING/train/SAYING_00444
9438 BEHIND/train/BEHIND_00437
9438 EVERY/train/EVERY_00499
9438 MURDER/train/MURDER_00474
9438 WORKERS/train/WORKERS_00760
9438 QUESTIONS/train/QUESTIONS_00253
9438 FRANCE/train/FRANCE_00549
9438 ALLEGATIONS/train/ALLEGATIONS_00262
9438 STREET/train/STREET_00575
9438 GROWTH/train/GROWTH_00661
9438 BECOME/train/BECOME_00722
9438 THERE/train/THERE_00772
9438 OUTSIDE/train/OUTSIDE_00273
9438 COUPLE/train/COUPLE_00400
9438 MONTHS/train/MONTHS_00647
9438 REFERENDUM/train/REFERENDUM_00074
9438 SHORT/train/SHORT_00872
9438 VIOLENCE/train/VIOLENCE_00934
9438 MURDER/train/MURDER_00529
9438 WALES/train/WALES_00887
9438 LOCAL/train/LOCAL_00302
9438 CLAIMS/train/CLAIMS_00133
9438 RATHER/train/RATHER_00283
9438 BEFORE/train/BEFORE_00299
9438 CURRENT/train/CURRENT_00452
9438 AFTER/train/AFTER_00533
9438 ABOUT/train/ABOUT_00231
9438 STAFF/train/STAFF_00392
9438 HEARD/train/HEARD_00384
9438 SOUTHERN/train/SOUTHERN_00897
9438 REPORTS/train/REPORTS_00760
9438 INFORMATION/train/INFORMATION_00154
9438 BUSINESS/train/BUSINESS_00902
9438 COMES/train/COMES_00061
9438 AFTER/train/AFTER_00463
9438 SPENDING/train/SPENDING_00577
9438 SYRIAN/train/SYRIAN_00220
9438 FOREIGN/train/FOREIGN_00257
9438 CUSTOMERS/train/CUSTOMERS_00433
9438 EVIDENCE/train/EVIDENCE_00780
9438 RATES/train/RATES_00674
9438 PRESS/train/PRESS_00869
9438 MORNING/train/MORNING_00295
9438 SERVICES/train/SERVICES_00607
9438 ALLEGATIONS/train/ALLEGATIONS_00284
9438 STAND/train/STAND_00074
9438 AGREEMENT/train/AGREEMENT_00755
9438 HAPPENED/train/HAPPENED_00786
9438 OBAMA/train/OBAMA_00315
9438 SEVEN/train/SEVEN_00313
9438 CONSERVATIVE/train/CONSERVATIVE_00313
9438 HOUSE/train/HOUSE_00013
9438 WHILE/train/WHILE_00062
9438 DAVID/train/DAVID_00414
9438 INFLATION/train/INFLATION_00648
9438 EVERYONE/train/EVERYONE_00475
9438 RESPONSE/train/RESPONSE_00861
9438 SUPPORT/test/SUPPORT_00033
9438 NORTH/train/NORTH_00071
9438 AMERICA/train/AMERICA_00442
9438 WEEKS/train/WEEKS_00431
9438 CRISIS/train/CRISIS_00270
9438 TEMPERATURES/train/TEMPERATURES_00403
9438 RECORD/train/RECORD_00255
9438 NEEDS/train/NEEDS_00348
9438 SECRETARY/train/SECRETARY_00914
9438 PRIVATE/train/PRIVATE_00432
9438 STORY/train/STORY_00954
9438 RECENT/train/RECENT_00310
9438 BETTER/train/BETTER_00510
9438 SECTOR/train/SECTOR_00555
9438 DAVID/train/DAVID_00936
9438 MIDDLE/train/MIDDLE_00333
9438 YESTERDAY/train/YESTERDAY_00696
9438 THEIR/train/THEIR_00167
9438 HAPPENED/train/HAPPENED_00328
9438 DAVID/train/DAVID_00997
9438 ECONOMIC/train/ECONOMIC_00014
9438 PRIVATE/train/PRIVATE_00576
9438 PRESSURE/train/PRESSURE_00475
9438 SECTOR/train/SECTOR_00667
9438 IMPACT/train/IMPACT_00429
9438 LATEST/train/LATEST_00662
9438 ALLEGATIONS/train/ALLEGATIONS_00809
9438 WESTERN/train/WESTERN_00274
9438 AHEAD/train/AHEAD_00851
9438 DIFFERENCE/val/DIFFERENCE_00040
9438 PRIVATE/train/PRIVATE_00663
9438 DEATH/train/DEATH_00017
9438 SPECIAL/train/SPECIAL_00282
9438 SPEAKING/train/SPEAKING_00613
9438 IMPACT/train/IMPACT_00366
9438 INDEPENDENT/train/INDEPENDENT_00623
9438 LATEST/train/LATEST_00877
9438 TRIAL/train/TRIAL_00661
9438 ATTACK/train/ATTACK_00793
9438 HUNDREDS/train/HUNDREDS_00502
9438 QUESTION/train/QUESTION_00498
9438 STAFF/train/STAFF_00474
9438 REPORTS/train/REPORTS_00657
9438 BELIEVE/train/BELIEVE_00542
9438 INDUSTRY/train/INDUSTRY_00695
9438 THOUGHT/train/THOUGHT_00236
9438 ACCUSED/train/ACCUSED_00574
9438 CHINA/train/CHINA_00759
9438 CHANGE/train/CHANGE_00490
9438 ALLOWED/train/ALLOWED_00112
9438 AFFAIRS/train/AFFAIRS_00653
9438 PRICE/train/PRICE_00671
9438 TAKING/train/TAKING_00240
9438 GUILTY/train/GUILTY_00721
9438 DEATH/train/DEATH_00992
9438 CONFLICT/train/CONFLICT_00398
9438 RULES/train/RULES_00454
9438 BIGGEST/train/BIGGEST_00057
9438 INFORMATION/train/INFORMATION_00837
9438 AHEAD/train/AHEAD_00973
9438 ACCUSED/train/ACCUSED_00543
9438 EVIDENCE/train/EVIDENCE_00574
9438 AFFAIRS/train/AFFAIRS_00819
9438 RECORD/train/RECORD_00776
9438 THEIR/train/THEIR_00128
9438 EXTRA/train/EXTRA_00300
9438 AFFECTED/train/AFFECTED_00025
9438 MEASURES/train/MEASURES_00766
9438 SPECIAL/train/SPECIAL_00131
9438 RESULT/train/RESULT_00866
9438 AMERICA/train/AMERICA_00567
9438 ALMOST/train/ALMOST_00765
9438 SECOND/train/SECOND_00738
9438 WORKERS/train/WORKERS_00684
9438 LITTLE/train/LITTLE_00045
9438 MONTH/train/MONTH_00700
9438 SOCIAL/train/SOCIAL_00408
9438 FOLLOWING/train/FOLLOWING_00649
9438 WORST/train/WORST_00195
9438 FORCE/train/FORCE_00535
9438 BANKS/train/BANKS_00894
9438 DESCRIBED/train/DESCRIBED_00688
9438 MIGHT/train/MIGHT_00203
9438 FOCUS/train/FOCUS_00483
9438 EVIDENCE/train/EVIDENCE_00209
9438 WINDS/train/WINDS_00722
9438 WANTS/train/WANTS_00306
9438 INVESTMENT/train/INVESTMENT_00172
9438 HEARD/train/HEARD_00891
9438 TONIGHT/train/TONIGHT_00254
9438 NUMBER/train/NUMBER_00062
9438 OFFICIALS/train/OFFICIALS_00307
9438 EDITOR/train/EDITOR_00348
9438 FACING/train/FACING_00817
9438 MONTHS/train/MONTHS_00666
9438 WORKERS/train/WORKERS_00192
9438 WELCOME/train/WELCOME_00054
9438 SEVEN/train/SEVEN_00211
9438 EMERGENCY/train/EMERGENCY_00201
9438 WRONG/train/WRONG_00835
9438 INSIDE/train/INSIDE_00169
9438 ACCUSED/train/ACCUSED_00629
9438 WORKING/train/WORKING_00056
9438 BLACK/train/BLACK_00071
9438 WELCOME/train/WELCOME_00665
9438 CUSTOMERS/train/CUSTOMERS_00088
9438 RIGHTS/train/RIGHTS_00443
9438 AGAINST/train/AGAINST_00165
9438 GROUND/train/GROUND_00987
9438 BROUGHT/train/BROUGHT_00469
9438 AMERICAN/train/AMERICAN_00057
9438 OFFICIALS/train/OFFICIALS_00818
9438 CENTRAL/train/CENTRAL_00133
9438 AMERICAN/train/AMERICAN_00004
9438 REPORT/train/REPORT_00472
9438 FINAL/train/FINAL_00447
9438 ACCUSED/train/ACCUSED_00547
9438 LATEST/train/LATEST_00729
9438 CHALLENGE/train/CHALLENGE_00720
9438 REPORTS/test/REPORTS_00049
9438 STORY/train/STORY_00721
9438 SCOTLAND/train/SCOTLAND_00325
9438 NUMBERS/train/NUMBERS_00818
9438 JUSTICE/train/JUSTICE_00795
9438 SECURITY/train/SECURITY_00829
9438 BORDER/train/BORDER_00924
9438 WARNING/train/WARNING_00147
9438 ARRESTED/train/ARRESTED_00230
9438 GLOBAL/train/GLOBAL_00819
9438 KNOWN/train/KNOWN_00487
9438 AUTHORITIES/train/AUTHORITIES_00913
9438 THOUGHT/train/THOUGHT_00089
9438 HOMES/train/HOMES_00411
9438 WANTED/train/WANTED_00450
9438 TONIGHT/train/TONIGHT_00046
9438 STAFF/train/STAFF_00800
9438 STAGE/train/STAGE_00184
9438 ALLEGATIONS/train/ALLEGATIONS_00203
9438 REPORTS/train/REPORTS_00172
9438 FAMILIES/val/FAMILIES_00018
9438 AFFECTED/train/AFFECTED_00755
9438 CAPITAL/train/CAPITAL_00277
9438 HAPPENING/train/HAPPENING_00261
9438 RESULT/train/RESULT_00388
9438 HISTORY/train/HISTORY_00620
9438 MEMBERS/train/MEMBERS_00702
9438 FIGHTING/train/FIGHTING_00336
9438 ISSUES/train/ISSUES_00748
9438 STAFF/train/STAFF_00787
9438 ANSWER/train/ANSWER_00513
9438 PRESS/train/PRESS_00432
9438 IRELAND/train/IRELAND_00886
9438 BEING/train/BEING_00704
9438 PLANS/train/PLANS_00029
9438 PHONE/train/PHONE_00446
9438 QUESTION/train/QUESTION_00805
9438 TRYING/train/TRYING_00361
9438 PRESIDENT/train/PRESIDENT_00370
9438 SECURITY/train/SECURITY_00283
9438 DESCRIBED/train/DESCRIBED_00745
9438 OFFICERS/train/OFFICERS_00249
9438 COUPLE/train/COUPLE_00364
9438 TODAY/train/TODAY_00064
9438 RUNNING/train/RUNNING_00015
9438 CRISIS/train/CRISIS_00464
9438 REPORT/train/REPORT_00839
9438 SERIOUS/train/SERIOUS_00390
9438 FOREIGN/train/FOREIGN_00421
9438 SCOTLAND/train/SCOTLAND_00935
9438 SECOND/train/SECOND_00554
9438 THROUGH/train/THROUGH_00238
9438 BILLION/train/BILLION_00190
9438 POLITICAL/train/POLITICAL_00595
9438 EVENTS/train/EVENTS_00805
9438 SUNDAY/train/SUNDAY_00399
9438 PATIENTS/train/PATIENTS_00931
9438 IMPACT/train/IMPACT_00465
9438 ALLOW/train/ALLOW_00579
9438 CURRENT/train/CURRENT_00205
9438 PRICES/train/PRICES_00688
9438 KNOWN/train/KNOWN_00952
9438 UNTIL/train/UNTIL_00101
9438 GAMES/train/GAMES_00294
9438 CHALLENGE/train/CHALLENGE_00674
9438 UNDER/train/UNDER_00254
9438 FAMILY/train/FAMILY_00686
9438 QUESTIONS/train/QUESTIONS_00350
9438 BROUGHT/train/BROUGHT_00367
9438 SPENT/train/SPENT_00462
9438 CHIEF/train/CHIEF_00604
9438 SUNDAY/train/SUNDAY_00891
9438 CASES/train/CASES_00365
9438 LEADER/val/LEADER_00039
9438 HEART/train/HEART_00510
9438 WHICH/train/WHICH_00677
9438 THROUGH/train/THROUGH_00668
9438 JUSTICE/train/JUSTICE_00267
9438 RUSSIAN/train/RUSSIAN_00841
9438 AFFECTED/train/AFFECTED_00810
9438 AREAS/train/AREAS_00422
9438 OUTSIDE/train/OUTSIDE_00169
9438 AMONG/train/AMONG_00235
9438 SINCE/train/SINCE_00593
9438 ECONOMIC/train/ECONOMIC_00395
9438 THREE/train/THREE_00202
9438 PRICES/train/PRICES_01000
9438 REPORTS/train/REPORTS_00252
9438 THOUSANDS/train/THOUSANDS_00805
9438 SYSTEM/train/SYSTEM_00758
9438 PLANS/train/PLANS_00505
9438 OPERATION/train/OPERATION_00313
9438 AMERICA/train/AMERICA_00174
9438 RULES/train/RULES_00153
9438 RULES/train/RULES_00297
9438 RECENT/train/RECENT_00233
9438 HISTORY/train/HISTORY_00405
9438 CHILDREN/train/CHILDREN_00710
9438 FACING/test/FACING_00042
9438 OFFICIALS/train/OFFICIALS_00779
9438 STREET/train/STREET_00413
9438 RECENT/train/RECENT_00700
9438 FORMER/train/FORMER_00200
9438 CENTRAL/train/CENTRAL_00540
9438 FRENCH/train/FRENCH_00765
9438 SITUATION/train/SITUATION_00713
9438 LEADERS/train/LEADERS_00027
9438 ALLEGATIONS/train/ALLEGATIONS_00463
9438 AMERICAN/train/AMERICAN_00614
9438 CUSTOMERS/train/CUSTOMERS_00494
9438 DIFFERENCE/train/DIFFERENCE_00664
9438 TODAY/train/TODAY_00614
9438 ASKING/train/ASKING_00842
9438 SERIES/train/SERIES_00408
9438 ALWAYS/train/ALWAYS_00901
9438 SPENT/train/SPENT_00200
9438 SOCIAL/train/SOCIAL_00482
9438 BEING/train/BEING_00392
9438 TRIAL/train/TRIAL_00025
9438 SCOTLAND/train/SCOTLAND_00001
9438 JUSTICE/train/JUSTICE_00014
9438 CUSTOMERS/train/CUSTOMERS_00566
9438 DETAILS/train/DETAILS_00560
9438 DESPITE/train/DESPITE_00188
9438 BORDER/train/BORDER_00909
9438 CAPITAL/train/CAPITAL_00077
9438 THEMSELVES/train/THEMSELVES_00152
9438 EMERGENCY/train/EMERGENCY_00022
9438 SERVICES/train/SERVICES_00518
9438 WALES/train/WALES_00107
9438 SPEAKING/train/SPEAKING_00179
9438 FINAL/train/FINAL_00462
9438 ALREADY/train/ALREADY_00949
9438 UNTIL/train/UNTIL_00273
9438 AFFAIRS/train/AFFAIRS_00802
9438 WELFARE/train/WELFARE_00300
9438 ECONOMY/train/ECONOMY_00732
9438 WEEKEND/train/WEEKEND_00814
9438 THIRD/train/THIRD_00882
9438 INCREASE/train/INCREASE_00386
9438 UNTIL/train/UNTIL_00250
9438 ANNOUNCED/train/ANNOUNCED_00517
9438 MEASURES/train/MEASURES_00347
9438 ECONOMY/train/ECONOMY_00560
9438 STRONG/train/STRONG_00948
9438 UNDER/train/UNDER_00868
9438 BETTER/train/BETTER_00552
9438 BANKS/train/BANKS_00778
9438 LATEST/train/LATEST_00277
9438 NUMBER/val/NUMBER_00039
9438 GREECE/train/GREECE_00511
9438 OFFICIALS/train/OFFICIALS_00726
9438 MINISTERS/train/MINISTERS_00556
9438 TOWARDS/train/TOWARDS_00760
9438 COMPANY/train/COMPANY_00454
9438 NEVER/train/NEVER_00578
9438 HIGHER/train/HIGHER_00435
9438 COUPLE/train/COUPLE_00891
9438 EVIDENCE/train/EVIDENCE_00187
9438 LONDON/train/LONDON_00891
9438 LEADER/train/LEADER_00072
9438 MURDER/train/MURDER_00891
9438 WHETHER/train/WHETHER_00689
9438 CASES/train/CASES_00422
9438 FORCES/train/FORCES_00919
9438 CASES/train/CASES_00091
9438 HEART/train/HEART_00242
9438 COULD/train/COULD_00510
9438 COMES/train/COMES_00490
9438 JAMES/train/JAMES_00702
9438 AFFECTED/train/AFFECTED_00778
9438 LARGE/train/LARGE_00109
9438 AMONG/train/AMONG_00595
9438 REPORT/train/REPORT_00253
9438 WALES/train/WALES_00994
9438 EDITOR/train/EDITOR_00152
9438 BROUGHT/train/BROUGHT_00908
9438 REPORT/train/REPORT_00587
9438 WANTED/train/WANTED_00432
9438 COUNTRY/train/COUNTRY_00533
9438 STARTED/train/STARTED_00547
9438 ACROSS/train/ACROSS_00511
9438 JUDGE/test/JUDGE_00003
9438 FRENCH/train/FRENCH_00076
9438 JAMES/train/JAMES_00586
9438 GROUP/train/GROUP_00209
9438 FIGURES/train/FIGURES_00097
9438 SPECIAL/train/SPECIAL_00623
9438 FINANCIAL/train/FINANCIAL_00193
9438 BUSINESS/train/BUSINESS_00608
9438 HAPPEN/train/HAPPEN_00780
9438 EARLY/train/EARLY_00815
9438 HOURS/train/HOURS_00185
9438 ABUSE/train/ABUSE_00396
9438 FACING/train/FACING_00698
9438 JUDGE/train/JUDGE_00525
9438 FOOTBALL/train/FOOTBALL_00081
9438 ANNOUNCED/train/ANNOUNCED_00731
9438 SECOND/train/SECOND_00695
9438 COMES/train/COMES_00949
9438 POWER/train/POWER_00131
9438 CUSTOMERS/train/CUSTOMERS_00777
9438 STATEMENT/train/STATEMENT_00427
9438 HISTORY/train/HISTORY_00560
9438 FAMILY/train/FAMILY_00902
9438 PRICES/train/PRICES_00919
9438 LEADER/train/LEADER_00466
9438 STAGE/train/STAGE_00516
9438 CUSTOMERS/train/CUSTOMERS_00006
9438 TIMES/train/TIMES_00523
9438 WITHIN/train/WITHIN_00156
9438 THIRD/train/THIRD_00050
9438 DAVID/train/DAVID_00293
9438 OFFICIALS/train/OFFICIALS_00527
9438 COMPANY/train/COMPANY_00920
9438 MURDER/train/MURDER_00006
9438 AFRICA/train/AFRICA_00241
9438 SENIOR/train/SENIOR_00443
9438 SERVICES/train/SERVICES_00788
9438 KILLED/train/KILLED_00605
9438 WEEKEND/train/WEEKEND_00141
9438 BRITAIN/train/BRITAIN_00890
9438 MEETING/train/MEETING_00769
9438 ALREADY/train/ALREADY_00326
9438 MURDER/train/MURDER_00952
9438 ABOUT/train/ABOUT_00868
9438 POWERS/train/POWERS_00460
9438 BRITISH/train/BRITISH_00381
9438 INQUIRY/train/INQUIRY_00058
9438 FIGHT/train/FIGHT_00347
9438 AMONG/train/AMONG_00615
9438 MONTH/train/MONTH_00675
9438 THOUSANDS/train/THOUSANDS_00593
9438 WELFARE/train/WELFARE_00100
9438 WHETHER/train/WHETHER_00387
9438 ACROSS/train/ACROSS_00599
9438 DEBATE/train/DEBATE_00912
9438 PARENTS/train/PARENTS_00367
9438 PARENTS/train/PARENTS_00260
9438 MATTER/train/MATTER_00364
9438 BENEFIT/train/BENEFIT_00473
9438 BENEFIT/train/BENEFIT_00437
9438 JAMES/train/JAMES_00413
9438 PHONE/train/PHONE_00974
9438 WORST/train/WORST_00175
9438 CHARGES/train/CHARGES_00293
9438 PRICES/train/PRICES_00310
9438 HEARD/train/HEARD_00066
9438 MINISTERS/train/MINISTERS_00585
9438 SEVERAL/train/SEVERAL_00189
9438 CRISIS/train/CRISIS_00603
9438 HISTORY/train/HISTORY_00852
9438 THREE/train/THREE_00196
9438 WARNING/train/WARNING_00650
9438 PRICE/train/PRICE_00980
9438 PHONE/train/PHONE_00208
9438 BEFORE/train/BEFORE_00150
9438 FOREIGN/train/FOREIGN_00751
9438 MESSAGE/train/MESSAGE_00738
9438 EDITOR/train/EDITOR_00108
9438 FACING/train/FACING_00838
9438 PLANS/train/PLANS_00100
9438 COULD/train/COULD_00990
9438 RECORD/train/RECORD_00828
9438 TRIAL/train/TRIAL_00540
9438 SPEECH/train/SPEECH_00212
9438 EMERGENCY/test/EMERGENCY_00029
9438 AREAS/train/AREAS_00495
9438 DEATH/train/DEATH_00247
9438 GREAT/train/GREAT_00438
9438 SITUATION/train/SITUATION_00699
9438 SYSTEM/train/SYSTEM_00777
9438 THREAT/val/THREAT_00007
9438 DESCRIBED/train/DESCRIBED_00780
9438 GIVING/train/GIVING_00045
9438 CASES/train/CASES_00309
9438 ARRESTED/train/ARRESTED_00063
9438 PROTECT/train/PROTECT_00761
9438 MANCHESTER/train/MANCHESTER_00477
9438 COMPANIES/train/COMPANIES_00153
9438 MAJOR/train/MAJOR_00415
9438 FOLLOWING/train/FOLLOWING_00175
9438 SPEECH/train/SPEECH_00705
9438 CAPITAL/train/CAPITAL_00923
9438 EDUCATION/train/EDUCATION_00189
9438 STORY/train/STORY_00482
9438 CAMERON/train/CAMERON_00708
9438 WORLD/train/WORLD_00946
9438 STORY/train/STORY_00597
9438 REFERENDUM/train/REFERENDUM_00090
9438 GLOBAL/train/GLOBAL_00160
9438 PERIOD/test/PERIOD_00004
9438 TRUST/val/TRUST_00006
9438 AFFAIRS/train/AFFAIRS_00302
9438 SOCIAL/train/SOCIAL_00261
9438 USING/train/USING_00596
9438 PRICE/train/PRICE_00046
9438 USING/train/USING_00791
9438 ARRESTED/train/ARRESTED_00783
9438 FOREIGN/train/FOREIGN_00588
9438 SPENT/train/SPENT_00531
9438 PERIOD/train/PERIOD_00623
9438 UNDER/train/UNDER_00711
9438 ACCUSED/train/ACCUSED_01000
9438 LONGER/train/LONGER_00375
9438 HOSPITAL/train/HOSPITAL_00134
9438 THREE/train/THREE_00522
9438 FAMILY/train/FAMILY_00993
9438 VOTERS/train/VOTERS_00544
9438 HUNDREDS/train/HUNDREDS_00716
9438 GETTING/train/GETTING_00565
9438 FUTURE/train/FUTURE_00626
9438 PHONE/train/PHONE_00939
9438 COMES/train/COMES_00254
9438 MEDICAL/train/MEDICAL_00357
9438 THOUGHT/test/THOUGHT_00037
9438 PLANS/train/PLANS_00437
9438 ATTACK/train/ATTACK_00430
9438 THREE/train/THREE_00082
9438 WELCOME/train/WELCOME_00363
9438 MANCHESTER/train/MANCHESTER_00396
9438 FOUND/train/FOUND_00629
9438 SPEAKING/train/SPEAKING_00845
9438 PHONE/train/PHONE_00264
9438 GUILTY/train/GUILTY_00074
9438 POSSIBLE/train/POSSIBLE_00305
9438 SHORT/train/SHORT_00152
9438 SENIOR/train/SENIOR_00066
9438 CHARGES/train/CHARGES_00970
9438 STATES/test/STATES_00030
9438 ALMOST/train/ALMOST_00291
9438 OFFICIALS/train/OFFICIALS_00507
9438 REPORTS/train/REPORTS_00905
9438 TAKING/train/TAKING_00967
9438 BEING/train/BEING_00418
9438 HOUSING/train/HOUSING_00168
9438 WOMEN/train/WOMEN_00905
9438 MINUTES/train/MINUTES_00222
9438 TRIAL/train/TRIAL_00401
9438 MINISTER/train/MINISTER_00378
9438 AFFAIRS/val/AFFAIRS_00038
9438 FOLLOWING/train/FOLLOWING_00085
9438 INVESTMENT/train/INVESTMENT_00665
9438 SINGLE/train/SINGLE_00932
9438 HAPPEN/train/HAPPEN_00053
9438 BECOME/train/BECOME_00386
9438 POWERS/train/POWERS_00071
9438 CAMERON/train/CAMERON_00371
9438 KILLED/train/KILLED_00511
9438 SHORT/train/SHORT_00946
9438 INDUSTRY/train/INDUSTRY_00351
9438 FOOTBALL/train/FOOTBALL_00889
9438 CHARGE/train/CHARGE_00298
9438 CRISIS/train/CRISIS_00069
9438 CONFERENCE/train/CONFERENCE_00251
9438 FOUND/train/FOUND_00425
9438 COURT/train/COURT_00145
9438 NEVER/train/NEVER_00723
9438 PRIME/train/PRIME_00168
9438 GROUP/train/GROUP_00156
9438 MILITARY/train/MILITARY_00424
9438 KILLED/train/KILLED_00055
9438 WELFARE/train/WELFARE_00451
9438 COMPANY/train/COMPANY_00321
9438 CONFLICT/train/CONFLICT_00156
9438 PERIOD/train/PERIOD_00587
9438 SCHOOL/train/SCHOOL_00740
9438 STAFF/train/STAFF_00311
9438 WEEKEND/train/WEEKEND_00697
9438 CENTRAL/train/CENTRAL_00397
9438 ACCUSED/test/ACCUSED_00039
9438 GIVEN/train/GIVEN_00854
9438 SCHOOLS/train/SCHOOLS_00457
9438 STREET/train/STREET_00663
9438 JUDGE/train/JUDGE_00801
9438 EVIDENCE/train/EVIDENCE_00525
9438 OPPOSITION/train/OPPOSITION_00586
9438 COMPANIES/train/COMPANIES_00267
9438 WATER/train/WATER_00267
9438 GROWTH/train/GROWTH_00520
9438 SPECIAL/train/SPECIAL_00307
9438 FOLLOWING/train/FOLLOWING_00028
9438 STAFF/train/STAFF_00365
9438 QUESTIONS/train/QUESTIONS_00602
9438 PARENTS/train/PARENTS_00854
9438 WEEKEND/train/WEEKEND_00207
9438 BORDER/train/BORDER_00362
9438 TRYING/train/TRYING_00901
9438 PRICE/train/PRICE_00075
9438 OFFICIALS/train/OFFICIALS_00579
9438 BIGGEST/train/BIGGEST_00750
9438 MISSING/train/MISSING_00308
9438 RIGHTS/train/RIGHTS_00191
9438 ISLAMIC/train/ISLAMIC_00401
9438 CHIEF/train/CHIEF_00611
9438 FRANCE/train/FRANCE_00716
9438 FOUND/train/FOUND_00447
9438 CHIEF/train/CHIEF_00984
9438 COMMUNITY/train/COMMUNITY_00387
9438 GROWTH/train/GROWTH_00898
9438 SENIOR/train/SENIOR_00315
9438 POLICE/train/POLICE_00471
9438 PHONE/train/PHONE_00340
9438 AHEAD/train/AHEAD_00009
9438 RATES/train/RATES_00431
9438 REPORT/train/REPORT_00158
9438 KILLED/train/KILLED_00433
9438 MURDER/train/MURDER_00740
9438 SITUATION/train/SITUATION_00269
9438 JUSTICE/train/JUSTICE_00778
9438 GLOBAL/train/GLOBAL_00582
9438 WORST/train/WORST_00433
9438 FINAL/train/FINAL_00703
9438 PATIENTS/train/PATIENTS_00920
9438 AFTER/train/AFTER_00451
9438 WANTS/train/WANTS_00998
9438 CONSERVATIVE/train/CONSERVATIVE_00300
9438 OPPOSITION/train/OPPOSITION_00030
9438 HUNDREDS/train/HUNDREDS_00315
9438 MILITARY/train/MILITARY_00387
9438 AMONG/train/AMONG_00337
9438 WORDS/train/WORDS_00921
9438 MONTHS/train/MONTHS_00275
9438 USING/train/USING_00845
9438 CASES/train/CASES_00842
9438 GIVEN/train/GIVEN_00952
9438 CHARGES/train/CHARGES_00286
9438 CLOSE/train/CLOSE_00308
9438 SYRIA/train/SYRIA_00851
9438 LEVEL/train/LEVEL_00912
9438 SCHOOL/train/SCHOOL_00346
9438 LEVEL/train/LEVEL_00174
9438 NATIONAL/train/NATIONAL_00181
9438 EXTRA/train/EXTRA_00878
9438 ACCUSED/train/ACCUSED_00611
9438 WINDS/train/WINDS_00285
9438 AFRICA/train/AFRICA_00505
9438 MEMBERS/train/MEMBERS_00490
9438 SECRETARY/train/SECRETARY_00841
9438 SITUATION/train/SITUATION_00355
9438 ECONOMIC/train/ECONOMIC_00774
9438 INTEREST/train/INTEREST_00319
9438 KILLED/train/KILLED_00653
9438 FIGHTING/train/FIGHTING_00302
9438 SIDES/train/SIDES_00504
9438 NATIONAL/train/NATIONAL_00474
9438 EXPECTED/train/EXPECTED_00182
9438 MAJOR/train/MAJOR_00332
9438 ARRESTED/train/ARRESTED_00839
9438 TEMPERATURES/train/TEMPERATURES_00960
9438 HOMES/train/HOMES_00474
9438 HAPPENED/train/HAPPENED_00279
9438 EMERGENCY/train/EMERGENCY_00334
9438 ARRESTED/train/ARRESTED_00443
9438 LIKELY/train/LIKELY_00316
9438 REPORT/train/REPORT_00059
9438 MISSING/train/MISSING_00704
9438 PHONE/train/PHONE_00306
9438 PRESS/train/PRESS_00368
9438 HEAVY/test/HEAVY_00044
9438 EXTRA/train/EXTRA_00594
9438 ACTION/train/ACTION_00773
9438 OBAMA/train/OBAMA_00731
9438 GLOBAL/train/GLOBAL_00750
9438 POSITION/train/POSITION_00470
9438 LEVEL/train/LEVEL_00945
9438 COURT/train/COURT_00712
9438 NUMBER/train/NUMBER_00882
9438 KILLED/train/KILLED_00095
9438 COUNTRY/train/COUNTRY_00879
9438 WELFARE/train/WELFARE_00674
9438 OFFICIALS/train/OFFICIALS_00609
9438 FAMILY/train/FAMILY_00042
9438 DESCRIBED/train/DESCRIBED_00326
9438 TONIGHT/train/TONIGHT_00973
9438 PRIME/train/PRIME_00902
9438 EXTRA/train/EXTRA_00658
9438 CANCER/train/CANCER_00095
9438 YESTERDAY/train/YESTERDAY_00483
9438 WEEKS/val/WEEKS_00050
9438 CONFERENCE/train/CONFERENCE_00798
9438 BANKS/test/BANKS_00021
9438 HUNDREDS/train/HUNDREDS_00179
9438 NEVER/train/NEVER_00381
9438 RULES/train/RULES_00744
9438 WOULD/train/WOULD_00261
9438 PATIENTS/train/PATIENTS_00288
9438 YOUNG/train/YOUNG_00177
9438 PATIENTS/train/PATIENTS_00741
9438 GUILTY/train/GUILTY_00247
9438 CANCER/train/CANCER_00188
9438 STATE/test/STATE_00034
9438 PLACE/train/PLACE_00850
9438 DEATH/train/DEATH_00380
9438 DEFICIT/train/DEFICIT_00393
9438 RECORD/train/RECORD_00898
9438 POWER/train/POWER_00998
9438 BETWEEN/train/BETWEEN_00846
9438 THIRD/train/THIRD_00990
9438 GAMES/train/GAMES_00111
9438 EVERY/train/EVERY_00576
9438 HUNDREDS/train/HUNDREDS_00293
9438 RECORD/train/RECORD_00739
9438 ENGLAND/train/ENGLAND_00561
9438 TONIGHT/train/TONIGHT_00622
9438 FIGURES/train/FIGURES_00871
9438 EXPECTED/train/EXPECTED_00765
9438 MIGHT/train/MIGHT_00461
9438 TERMS/train/TERMS_00214
9438 HOMES/train/HOMES_00634
9438 SPEAKING/train/SPEAKING_00440
9438 STATES/train/STATES_00984
9438 WEEKS/train/WEEKS_00846
9438 VICTIMS/train/VICTIMS_00654
9438 SERIES/train/SERIES_00768
9438 POWERS/test/POWERS_00008
9438 COUNCIL/train/COUNCIL_00325
9438 GLOBAL/test/GLOBAL_00018
9438 MAJOR/train/MAJOR_00861
9438 FRENCH/train/FRENCH_00035
9438 THEMSELVES/train/THEMSELVES_00930
9438 STAFF/train/STAFF_00929
9438 AFFAIRS/train/AFFAIRS_00027
9438 EDITOR/train/EDITOR_00358
9438 STAGE/train/STAGE_00390
9438 FIGHT/test/FIGHT_00012
9438 BUSINESS/train/BUSINESS_00058
9438 DECISION/train/DECISION_00768
9438 TAKING/train/TAKING_00100
9438 TALKING/train/TALKING_00954
9438 PLANS/train/PLANS_00704
9438 ENGLAND/train/ENGLAND_00195
9438 WARNING/train/WARNING_00010
9438 MINISTERS/train/MINISTERS_00493
9438 SERIOUS/train/SERIOUS_00453
9438 SCHOOL/train/SCHOOL_00474
9438 MILITARY/train/MILITARY_00623
9438 AMONG/train/AMONG_00655
9438 REFERENDUM/train/REFERENDUM_00470
9438 EXTRA/train/EXTRA_00010
9438 THREE/train/THREE_00591
9438 ALMOST/train/ALMOST_00600
9438 SPECIAL/train/SPECIAL_00587
9438 SYRIAN/train/SYRIAN_00329
9438 THIRD/train/THIRD_00307
9438 LEADERS/train/LEADERS_00522
9438 ENERGY/train/ENERGY_00074
9438 CLOUD/train/CLOUD_00413
9438 AFRICA/train/AFRICA_00590
9438 CALLED/train/CALLED_00534
9438 CUSTOMERS/train/CUSTOMERS_00784
9438 EVENING/train/EVENING_00980
9438 TOMORROW/train/TOMORROW_00901
9438 WELCOME/train/WELCOME_00028
9438 COUNCIL/train/COUNCIL_00827
9438 MINISTER/train/MINISTER_00667
9438 INDEPENDENT/train/INDEPENDENT_00705
9438 UNION/train/UNION_00182
9438 STREET/train/STREET_00352
9438 LITTLE/train/LITTLE_00003
9438 PLACE/train/PLACE_00167
9438 LATEST/train/LATEST_00100
9438 REFERENDUM/train/REFERENDUM_00591
9438 ANOTHER/train/ANOTHER_00302
9438 ARRESTED/train/ARRESTED_00471
9438 PROTECT/train/PROTECT_00039
9438 MAKES/train/MAKES_00399
9438 STREET/train/STREET_00639
9438 GUILTY/train/GUILTY_00548
9438 THREE/train/THREE_00728
9438 NUMBER/train/NUMBER_00402
9438 WITHIN/train/WITHIN_00821
9438 PHONE/train/PHONE_00579
9438 DECISION/train/DECISION_00923
9438 DAVID/test/DAVID_00045
9438 SCOTLAND/train/SCOTLAND_00321
9438 AFFAIRS/train/AFFAIRS_00395
9438 THOUSANDS/train/THOUSANDS_00411
9438 WEEKS/train/WEEKS_00472
9438 SERVICES/train/SERVICES_00127
9438 POLITICAL/train/POLITICAL_00463
9438 WHILE/train/WHILE_00421
9438 LIVING/train/LIVING_00483
9438 UNION/train/UNION_00998
9438 KILLED/train/KILLED_00661
9438 AMONG/train/AMONG_00054
9438 PRIME/train/PRIME_00629
9438 WORST/train/WORST_00543
9438 COMES/train/COMES_00982
9438 FORWARD/train/FORWARD_00540
9438 MURDER/train/MURDER_00134
9438 LONGER/train/LONGER_00646
9438 FOUND/train/FOUND_00799
9438 BROUGHT/test/BROUGHT_00015
9438 REPORTS/train/REPORTS_00967
9438 COURT/train/COURT_00294
9438 MEETING/train/MEETING_00276
9438 DECIDED/train/DECIDED_00596
9438 IMMIGRATION/train/IMMIGRATION_00192
9438 CHIEF/test/CHIEF_00021
9438 SEVEN/train/SEVEN_00985
9438 MAKING/train/MAKING_00338
9438 POLITICS/train/POLITICS_00395
9438 CANCER/train/CANCER_00787
9438 RIGHT/train/RIGHT_00569
9438 ASKING/train/ASKING_00746
9438 LONDON/train/LONDON_00614
9438 TRIAL/train/TRIAL_00930
9438 EDITOR/train/EDITOR_00077
9438 ALREADY/train/ALREADY_00716
9438 MISSING/train/MISSING_00541
9438 FOLLOWING/train/FOLLOWING_00368
9438 BECOME/train/BECOME_00401
9438 MONEY/train/MONEY_00671
9438 CONTINUE/train/CONTINUE_00865
9438 EVIDENCE/train/EVIDENCE_00414
9438 SPEAKING/train/SPEAKING_00118
9438 ANOTHER/train/ANOTHER_00120
9438 RETURN/train/RETURN_00116
9438 AUTHORITIES/train/AUTHORITIES_00731
9438 RATES/train/RATES_00707
9438 AFTER/train/AFTER_00511
9438 MEDIA/train/MEDIA_00888
9438 MIDDLE/train/MIDDLE_00017
9438 UNITED/train/UNITED_00876
9438 AMERICA/train/AMERICA_00669
9438 REPORTS/train/REPORTS_00428
9438 REPORTS/train/REPORTS_00670
9438 FINANCIAL/train/FINANCIAL_00529
9438 GIVEN/train/GIVEN_00640
9438 MONTH/train/MONTH_00407
9438 EVENTS/train/EVENTS_00174
9438 FAMILY/train/FAMILY_00328
9438 TIMES/val/TIMES_00048
9438 CALLED/train/CALLED_00939
9438 EDITOR/train/EDITOR_00758
9438 PRESS/train/PRESS_00635
9438 INFLATION/train/INFLATION_00110
9438 POINT/train/POINT_00517
9438 RECORD/train/RECORD_00887
9438 LOOKING/train/LOOKING_00719
9438 AROUND/train/AROUND_00827
9438 VICTIMS/test/VICTIMS_00045
9438 TALKS/train/TALKS_00569
9438 BETWEEN/train/BETWEEN_00690
9438 AFFAIRS/train/AFFAIRS_00291
9438 COULD/train/COULD_00369
9438 LATEST/train/LATEST_00094
9438 THESE/train/THESE_00563
9438 HOURS/train/HOURS_00327
9438 SYRIAN/train/SYRIAN_00256
9438 UNDER/train/UNDER_00943
9438 MONTH/train/MONTH_00617
9438 PARTS/train/PARTS_00958
9438 TRIAL/train/TRIAL_00131
9438 MANCHESTER/train/MANCHESTER_00191
9438 TEMPERATURES/train/TEMPERATURES_00735
9438 AMERICAN/train/AMERICAN_00719
9438 TALKING/train/TALKING_00661
9438 PARTIES/val/PARTIES_00016
9438 ENERGY/train/ENERGY_00824
9438 EVENING/train/EVENING_00608
9438 RULES/train/RULES_00125
9438 ENOUGH/train/ENOUGH_00194
9438 AFRICA/train/AFRICA_00703
9438 BRITISH/train/BRITISH_00558
9438 WANTS/test/WANTS_00013
9438 SPECIAL/train/SPECIAL_00326
9438 STORY/train/STORY_00067
9438 DESPITE/train/DESPITE_00508
9438 TAKEN/train/TAKEN_00614
9438 TRIAL/train/TRIAL_00791
9438 IMPACT/train/IMPACT_00652
9438 FOUND/train/FOUND_00737
9438 TONIGHT/train/TONIGHT_00913
9438 ACCUSED/train/ACCUSED_00779
9438 MAJORITY/train/MAJORITY_00909
9438 EVERY/train/EVERY_00189
9438 WOMEN/train/WOMEN_00796
9438 WELCOME/train/WELCOME_00861
9438 AMERICAN/train/AMERICAN_00920
9438 OFFICE/train/OFFICE_00451
9438 PARTY/train/PARTY_00638
9438 REPORT/train/REPORT_00467
9438 FAMILIES/train/FAMILIES_00723
9438 BROUGHT/train/BROUGHT_00292
9438 ENERGY/train/ENERGY_00380
9438 BIGGEST/train/BIGGEST_00634
9438 SCOTTISH/train/SCOTTISH_00502
9438 WORST/train/WORST_00703
9438 PHONE/train/PHONE_00201
9438 STATE/train/STATE_00715
9438 HOUSING/train/HOUSING_00083
9438 BUSINESS/train/BUSINESS_00280
9438 FOUND/train/FOUND_00654
9438 THREAT/test/THREAT_00029
9438 BORDER/train/BORDER_00302
9438 ABUSE/test/ABUSE_00030
9438 CAPITAL/train/CAPITAL_00082
9438 KNOWN/train/KNOWN_00642
9438 PARENTS/train/PARENTS_00427
9438 MINISTER/train/MINISTER_00712
9438 MESSAGE/train/MESSAGE_00760
9438 EDITOR/train/EDITOR_00798
9438 COUNCIL/train/COUNCIL_00650
9438 CASES/train/CASES_00743
9438 FIGHTING/train/FIGHTING_00371
9438 MINISTER/train/MINISTER_00999
9438 BEFORE/train/BEFORE_00970
9438 DEATH/train/DEATH_00073
9438 CANCER/train/CANCER_00172
9438 CRISIS/train/CRISIS_00112
9438 CAMERON/train/CAMERON_00624
9438 KILLED/train/KILLED_00587
9438 WHILE/train/WHILE_00162
9438 SECURITY/train/SECURITY_00621
9438 DEBATE/train/DEBATE_00162
9438 LEGAL/train/LEGAL_00713
9438 OFFICE/train/OFFICE_00063
9438 AFTER/train/AFTER_00860
9438 MEASURES/train/MEASURES_00783
9438 CONFLICT/train/CONFLICT_00895
9438 SECRETARY/train/SECRETARY_00762
9438 DETAILS/train/DETAILS_00337
9438 AFTER/train/AFTER_00558
9438 GIVEN/train/GIVEN_00926
9438 ATTACK/train/ATTACK_00723
9438 MONTH/test/MONTH_00011
9438 USING/train/USING_00937
9438 ENOUGH/train/ENOUGH_00433
9438 AMERICAN/train/AMERICAN_00341
9438 ARRESTED/train/ARRESTED_00254
9438 RATES/train/RATES_00626
9438 GLOBAL/train/GLOBAL_00135
9438 POLICE/train/POLICE_00330
9438 PHONE/train/PHONE_00756
9438 WANTED/train/WANTED_00423
9438 RECORD/train/RECORD_00635
9438 WITHOUT/train/WITHOUT_00528
9438 CLOSE/train/CLOSE_00991
9438 LIVES/train/LIVES_00609
9438 BORDER/train/BORDER_00667
9438 COMING/train/COMING_00604
9438 AMERICAN/train/AMERICAN_00362
9438 GAMES/train/GAMES_00368
9438 LATER/train/LATER_00571
9438 LATEST/train/LATEST_00350
9438 THOUSANDS/train/THOUSANDS_00310
9438 AGAINST/train/AGAINST_00444
9438 SMALL/train/SMALL_00204
9438 AGAINST/train/AGAINST_00405
9438 BROUGHT/train/BROUGHT_00121
9438 STILL/train/STILL_00653
9438 SENIOR/train/SENIOR_00465
9438 HEART/train/HEART_00487
9438 POLICE/train/POLICE_00168
9438 PROBLEMS/train/PROBLEMS_00686
9438 OPERATION/train/OPERATION_00485
9438 HUNDREDS/train/HUNDREDS_00523
9438 STARTED/train/STARTED_00271
9438 CRISIS/train/CRISIS_00192
9438 ANNOUNCED/train/ANNOUNCED_00244
9438 JAMES/test/JAMES_00012
9438 RESULT/train/RESULT_00144
9438 GROUP/train/GROUP_00803
9438 FIGURES/train/FIGURES_00531
9438 HEALTH/train/HEALTH_00765
9438 STAGE/train/STAGE_00058
9438 KNOWN/train/KNOWN_00935
9438 COUPLE/train/COUPLE_00369
9438 ACCESS/train/ACCESS_00908
9438 EDITOR/test/EDITOR_00007
9438 COURT/train/COURT_00601
9438 THEIR/train/THEIR_00607
9438 ECONOMIC/train/ECONOMIC_00783
9438 STORY/train/STORY_00677
9438 CHINA/train/CHINA_00909
9438 DAVID/train/DAVID_00019
9438 CONSERVATIVE/train/CONSERVATIVE_00670
9438 DESCRIBED/train/DESCRIBED_00226
9438 TRIAL/train/TRIAL_00111
9438 RECORD/train/RECORD_00804
9438 SPEND/test/SPEND_00031
9438 KILLED/train/KILLED_00740
9438 BUDGET/train/BUDGET_00543
9438 CHARGE/train/CHARGE_00156
9438 OFFICERS/train/OFFICERS_00550
9438 WOULD/train/WOULD_00741
9438 ATTACKS/train/ATTACKS_00200
9438 HEART/train/HEART_00481
9438 HOMES/train/HOMES_00223
9438 TODAY/train/TODAY_00595
9438 PARLIAMENT/train/PARLIAMENT_00880
9438 SEVEN/train/SEVEN_00500
9438 PERIOD/train/PERIOD_00913
9438 THOUSANDS/train/THOUSANDS_00977
9438 GUILTY/train/GUILTY_00117
9438 DECIDED/train/DECIDED_00698
9438 CALLED/train/CALLED_00411
9438 WARNING/train/WARNING_00340
9438 PRESIDENT/train/PRESIDENT_00526
9438 PARLIAMENT/train/PARLIAMENT_00695
9438 ENOUGH/train/ENOUGH_00476
9438 ALMOST/train/ALMOST_00807
9438 ACCUSED/train/ACCUSED_00805
9438 FINAL/train/FINAL_00546
9438 MATTER/train/MATTER_00237
9438 PAYING/train/PAYING_00231
9438 ACTION/train/ACTION_00926
9438 SHORT/train/SHORT_00988
9438 EXTRA/train/EXTRA_00557
9438 GUILTY/train/GUILTY_00576
9438 LONDON/train/LONDON_00847
9438 ANNOUNCED/train/ANNOUNCED_00605
9438 ARRESTED/train/ARRESTED_00286
9438 STREET/train/STREET_00870
9438 THOUGHT/train/THOUGHT_00120
9438 AFFAIRS/train/AFFAIRS_00703
9438 JUSTICE/train/JUSTICE_00905
9438 SINCE/train/SINCE_00899
9438 BLACK/train/BLACK_00424
9438 YEARS/train/YEARS_00631
9438 THOUSANDS/train/THOUSANDS_00530
9438 REFERENDUM/train/REFERENDUM_00839
9438 LITTLE/train/LITTLE_00028
9438 SEEMS/train/SEEMS_00732
9438 HUNDREDS/train/HUNDREDS_00222
9438 POLITICIANS/train/POLITICIANS_00562
9438 ABSOLUTELY/train/ABSOLUTELY_00583
9438 FIRST/train/FIRST_00097
9438 MURDER/train/MURDER_00579
9438 AMONG/train/AMONG_00112
9438 HIGHER/train/HIGHER_00628
9438 EVIDENCE/train/EVIDENCE_00403
9438 WITHIN/train/WITHIN_00169
9438 HOSPITAL/train/HOSPITAL_00412
9438 KILLED/train/KILLED_00807
9438 STATES/train/STATES_00906
9438 GOING/test/GOING_00018
9438 MASSIVE/train/MASSIVE_00441
9438 FOLLOWING/train/FOLLOWING_00304
9438 MILLION/train/MILLION_00303
9438 LEADER/train/LEADER_00076
9438 SYRIAN/train/SYRIAN_00859
9438 BEHIND/train/BEHIND_00238
9438 LABOUR/train/LABOUR_00387
9438 FAMILIES/train/FAMILIES_00287
9438 BEHIND/train/BEHIND_00293
9438 STAFF/train/STAFF_00762
9438 WORST/train/WORST_00723
9438 ALLEGATIONS/train/ALLEGATIONS_00412
9438 DEATH/test/DEATH_00006
9438 ALLOW/train/ALLOW_00008
9438 BEHIND/train/BEHIND_00749
9438 CHIEF/train/CHIEF_00863
9438 STAFF/train/STAFF_00033
9438 MEMBERS/train/MEMBERS_00553
9438 STRONG/train/STRONG_00161
9438 INQUIRY/train/INQUIRY_00410
9438 SERVICE/train/SERVICE_00905
9438 CANNOT/train/CANNOT_00045
9438 KNOWN/test/KNOWN_00050
9438 JAMES/train/JAMES_00652
9438 SYSTEM/train/SYSTEM_00901
9438 DEATH/train/DEATH_00752
9438 REPORTS/train/REPORTS_00415
9438 CONCERNS/train/CONCERNS_00584
9438 HOSPITAL/train/HOSPITAL_00613
9438 WELCOME/train/WELCOME_00133
9438 PLANS/train/PLANS_00881
9438 NUMBERS/train/NUMBERS_00538
9438 COMPANY/train/COMPANY_00028
9438 WITHOUT/train/WITHOUT_00907
9438 MISSING/train/MISSING_00072
9438 ENGLAND/train/ENGLAND_00241
9438 STATEMENT/train/STATEMENT_00531
9438 PROVIDE/train/PROVIDE_00658
9438 MONEY/train/MONEY_00974
9438 PROCESS/train/PROCESS_00461
9438 REPORTS/train/REPORTS_00943
9438 ACCUSED/train/ACCUSED_00591
9438 SOMETHING/test/SOMETHING_00009
9438 ASKING/train/ASKING_00882
9438 CAMPAIGN/train/CAMPAIGN_00630
9438 ANSWER/train/ANSWER_00839
9438 MORNING/train/MORNING_00119
9438 CONCERNS/train/CONCERNS_00625
9438 EASTERN/train/EASTERN_00733
9438 THREAT/train/THREAT_00982
9438 YESTERDAY/train/YESTERDAY_00194
9438 CALLED/train/CALLED_00370
9438 UNION/train/UNION_01000
9438 CENTRAL/train/CENTRAL_00154
9438 HUMAN/train/HUMAN_00366
9438 COMPANY/train/COMPANY_00498
9438 SERVICES/train/SERVICES_00206
9438 INQUIRY/train/INQUIRY_00673
9438 ALLEGATIONS/train/ALLEGATIONS_00738
9438 DECISION/train/DECISION_00703
9438 SPECIAL/train/SPECIAL_00838
9438 INQUIRY/train/INQUIRY_00739
9438 EVENTS/train/EVENTS_00178
9438 AMONG/train/AMONG_00699
9438 PERSONAL/train/PERSONAL_00703
9438 EVENING/train/EVENING_00872
9438 SYRIAN/train/SYRIAN_00828
9438 HOSPITAL/train/HOSPITAL_00411
9438 REPORTS/train/REPORTS_00903
9438 WATER/train/WATER_00854
9438 LEGAL/train/LEGAL_00018
9438 RIGHT/train/RIGHT_00060
9438 THEMSELVES/train/THEMSELVES_00473
9438 NIGHT/test/NIGHT_00043
9438 FOOTBALL/train/FOOTBALL_00318
9438 EDUCATION/train/EDUCATION_00193
9438 SPEECH/train/SPEECH_00654
9438 MONTHS/train/MONTHS_00883
9438 HUMAN/train/HUMAN_00359
9438 PRESIDENT/train/PRESIDENT_00035
9438 PRESIDENT/train/PRESIDENT_00522
9438 JAMES/train/JAMES_00195
9438 OFFICIALS/train/OFFICIALS_00353
9438 FOCUS/train/FOCUS_00901
9438 ASKING/test/ASKING_00034
9438 AFFAIRS/train/AFFAIRS_00870
9438 RESPONSE/train/RESPONSE_00600
9438 PARENTS/train/PARENTS_00228
9438 HEALTH/train/HEALTH_00421
9438 MOMENT/train/MOMENT_00465
9438 LABOUR/train/LABOUR_00603
9438 SINGLE/train/SINGLE_00039
9438 HISTORY/train/HISTORY_00635
9438 CAPITAL/train/CAPITAL_00054
9438 STATEMENT/train/STATEMENT_00517
9438 MIDDLE/train/MIDDLE_00621
9438 MONTH/train/MONTH_00458
9438 LEAST/train/LEAST_00028
9438 FAMILIES/train/FAMILIES_00537
9438 CRIME/train/CRIME_00534
9438 BENEFIT/test/BENEFIT_00011
9438 EUROPEAN/train/EUROPEAN_00529
9438 LATER/train/LATER_00194
9438 JUDGE/train/JUDGE_00718
9438 CENTRAL/train/CENTRAL_00803
9438 BEING/train/BEING_00199
9438 MONTH/train/MONTH_00684
9438 INDUSTRY/train/INDUSTRY_00056
9438 GUILTY/train/GUILTY_00099
9438 EVENING/train/EVENING_00304
9438 SPENDING/train/SPENDING_00321
9438 PEOPLE/train/PEOPLE_00350
9438 SERVICES/train/SERVICES_00169
9438 HIGHER/train/HIGHER_00416
9438 MOMENT/train/MOMENT_00754
9438 PHONE/train/PHONE_00021
9438 COUNTRY/train/COUNTRY_00716
9438 FACING/train/FACING_00440
9438 WHICH/train/WHICH_00765
9438 CRISIS/train/CRISIS_00490
9438 REPORTS/train/REPORTS_00241
9438 SECRETARY/train/SECRETARY_00140
9438 PRESSURE/train/PRESSURE_00586
9438 LEAVE/train/LEAVE_00188
9438 DURING/train/DURING_00554
9438 LABOUR/train/LABOUR_00409
9438 POLITICIANS/train/POLITICIANS_00709
9438 STORY/train/STORY_00857
9438 MASSIVE/train/MASSIVE_00151
9438 SPECIAL/train/SPECIAL_00183
9438 DESCRIBED/train/DESCRIBED_00100
9438 PRESIDENT/train/PRESIDENT_00457
9438 BRITISH/train/BRITISH_00218
9438 VICTIMS/train/VICTIMS_00947
9438 VIOLENCE/train/VIOLENCE_00797
9438 AMONG/train/AMONG_00135
9438 ALLEGATIONS/train/ALLEGATIONS_00980
9438 DESCRIBED/train/DESCRIBED_00081
9438 LEAVE/train/LEAVE_00394
9438 AFTER/train/AFTER_00398
9438 AUTHORITIES/train/AUTHORITIES_00457
9438 PROBLEM/train/PROBLEM_00122
9438 BRITAIN/train/BRITAIN_00628
9438 GROWING/train/GROWING_00979
9438 DEATH/train/DEATH_00363
9438 PROBLEMS/train/PROBLEMS_00309
9438 COUNTRY/train/COUNTRY_00406
9438 FINANCIAL/train/FINANCIAL_00987
9438 THREAT/train/THREAT_00794
9438 HOMES/train/HOMES_00488
9438 STATES/train/STATES_00929
9438 LOOKING/train/LOOKING_00102
9438 SERIES/train/SERIES_00012
9438 SIGNIFICANT/train/SIGNIFICANT_00761
9438 DESCRIBED/train/DESCRIBED_00488
9438 THOUSANDS/train/THOUSANDS_00855
9438 ALMOST/train/ALMOST_00474
9438 ATTACKS/train/ATTACKS_00307
9438 BUDGET/train/BUDGET_00401
9438 HOUSE/train/HOUSE_00500
9438 WOMEN/train/WOMEN_00176
9438 PRESS/train/PRESS_00118
9438 LEADER/train/LEADER_00742
9438 ABUSE/train/ABUSE_00232
9438 NATIONAL/train/NATIONAL_00631
9438 HEART/train/HEART_00408
9438 RUSSIAN/train/RUSSIAN_00437
9438 HUNDREDS/train/HUNDREDS_00536
9438 LEADER/train/LEADER_00480
9438 DIFFERENCE/train/DIFFERENCE_00280
9438 MILITARY/train/MILITARY_00420
9438 CHIEF/train/CHIEF_00803
9438 SECURITY/train/SECURITY_00479
9438 INFLATION/train/INFLATION_00109
9438 PAYING/train/PAYING_00277
9438 WAITING/test/WAITING_00034
9438 MURDER/train/MURDER_00234
9438 CHIEF/test/CHIEF_00016
9438 RATHER/test/RATHER_00023
9438 WEEKEND/train/WEEKEND_00198
9438 ECONOMY/train/ECONOMY_00226
9438 MONTHS/train/MONTHS_00184
9438 RECORD/train/RECORD_00184
9438 UNION/train/UNION_00881
9438 FORMER/train/FORMER_00619
9438 COMMUNITY/train/COMMUNITY_00368
9438 SYRIAN/train/SYRIAN_00283
9438 EASTERN/train/EASTERN_00417
9438 GUILTY/train/GUILTY_00601
9438 LABOUR/train/LABOUR_00448
9438 WORDS/train/WORDS_00692
9438 LATEST/train/LATEST_00485
9438 RUSSIAN/train/RUSSIAN_00797
9438 ANNOUNCED/train/ANNOUNCED_00186
9438 WITHIN/val/WITHIN_00012
9438 LATEST/train/LATEST_00563
9438 PHONE/train/PHONE_00257
9438 FIGURES/train/FIGURES_00037
9438 ACTION/train/ACTION_00625
9438 COMPANY/train/COMPANY_00197
9438 ENERGY/train/ENERGY_00402
9438 BIGGEST/train/BIGGEST_00172
9438 SEVEN/test/SEVEN_00029
9438 FIRST/train/FIRST_00512
9438 GROWING/train/GROWING_00729
9438 WALES/train/WALES_00835
9438 OFFICIALS/train/OFFICIALS_00310
9438 ALLEGATIONS/train/ALLEGATIONS_00748
9438 FOLLOWING/test/FOLLOWING_00043
9438 GROWING/train/GROWING_00176
9438 HEAVY/train/HEAVY_00568
9438 FOUND/train/FOUND_00508
9438 MOMENT/train/MOMENT_00778
9438 BEHIND/train/BEHIND_00660
9438 SECRETARY/train/SECRETARY_00615
9438 FORMER/train/FORMER_00802
9438 WHETHER/train/WHETHER_00732
9438 MOMENT/train/MOMENT_00739
9438 HEAVY/train/HEAVY_00480
9438 KNOWN/train/KNOWN_00860
9438 AFFECTED/train/AFFECTED_00324
9438 STAFF/train/STAFF_00548
9438 TRIAL/train/TRIAL_00936
9438 CHANGES/train/CHANGES_00919
9438 MILLIONS/test/MILLIONS_00022
9438 CLAIMS/train/CLAIMS_00542
9438 RIGHTS/train/RIGHTS_00353
9438 MILLION/train/MILLION_00863
9438 GROWTH/train/GROWTH_00093
9438 TONIGHT/train/TONIGHT_00140
9438 BECOME/train/BECOME_00307
9438 FORCES/train/FORCES_00014
9438 PRISON/train/PRISON_00652
9438 DESCRIBED/train/DESCRIBED_00769
9438 SCOTTISH/train/SCOTTISH_00779
9438 WELCOME/train/WELCOME_00708
9438 MESSAGE/train/MESSAGE_00020
9438 GEORGE/train/GEORGE_00055
9438 FAMILIES/train/FAMILIES_00009
9438 OUTSIDE/train/OUTSIDE_00525
9438 DURING/train/DURING_00202
9438 INVOLVED/train/INVOLVED_00525
9438 MANCHESTER/train/MANCHESTER_00088
9438 ACCORDING/train/ACCORDING_00488
9438 MEDIA/train/MEDIA_00550
9438 CHILDREN/train/CHILDREN_00614
9438 RETURN/train/RETURN_00453
9438 OTHERS/train/OTHERS_00343
9438 AFTER/test/AFTER_00005
9438 CHILD/train/CHILD_00873
9438 THEMSELVES/train/THEMSELVES_00680
9438 GROUND/train/GROUND_00506
9438 FRANCE/train/FRANCE_00856
9438 SYRIAN/train/SYRIAN_00391
9438 SINCE/train/SINCE_00856
9438 GOVERNMENT/train/GOVERNMENT_00185
9438 COMPANY/train/COMPANY_00598
9438 COMES/train/COMES_00070
9438 ABOUT/train/ABOUT_00392
9438 ACCORDING/train/ACCORDING_00464
9438 INVOLVED/train/INVOLVED_00183
9438 DECISION/train/DECISION_00800
9438 HEART/train/HEART_00531
9438 MILLION/train/MILLION_00054
9438 OTHERS/train/OTHERS_00615
9438 BILLION/train/BILLION_00779
9438 GAMES/train/GAMES_00572
9438 STATEMENT/train/STATEMENT_00380
9438 IRELAND/train/IRELAND_00663
9438 INQUIRY/train/INQUIRY_00232
9438 CHINA/train/CHINA_00627
9438 OFFICERS/train/OFFICERS_00218
9438 FUTURE/train/FUTURE_00795
9438 ASKING/train/ASKING_00825
9438 EDITOR/test/EDITOR_00045
9438 MESSAGE/train/MESSAGE_00569
9438 COURT/train/COURT_00359
9438 MINISTERS/train/MINISTERS_00489
9438 EARLY/train/EARLY_00373
9438 PRICE/train/PRICE_00107
9438 GROUND/train/GROUND_00065
9438 OTHERS/train/OTHERS_00780
9438 BRITISH/train/BRITISH_00862
9438 CHANCE/train/CHANCE_00954
9438 CHIEF/train/CHIEF_00833
9438 KILLED/train/KILLED_00541
9438 LEADERS/train/LEADERS_00916
9438 THOUSANDS/train/THOUSANDS_00576
9438 PUBLIC/train/PUBLIC_00105
9438 LATEST/train/LATEST_00127
9438 FIGURES/train/FIGURES_00316
9438 HUMAN/train/HUMAN_00706
9438 LATEST/train/LATEST_00547
9438 SENIOR/train/SENIOR_00972
9438 CRISIS/train/CRISIS_00408
9438 YESTERDAY/train/YESTERDAY_00397
9438 TALKS/train/TALKS_00608
9438 OFFICE/train/OFFICE_00533
9438 RATES/train/RATES_00715
9438 TRIAL/test/TRIAL_00021
9438 COULD/train/COULD_00997
9438 CLEAR/test/CLEAR_00004
9438 PRISON/train/PRISON_00177
9438 EXPECTED/train/EXPECTED_00010
9438 TRIAL/train/TRIAL_00051
9438 REPORTS/train/REPORTS_00249
9438 GUILTY/train/GUILTY_00288
9438 GAMES/train/GAMES_00127
9438 TRADE/train/TRADE_00718
9438 FINANCIAL/train/FINANCIAL_00865
9438 HOSPITAL/train/HOSPITAL_00671
9438 LEAVE/train/LEAVE_00621
9438 EDITOR/train/EDITOR_00458
9438 UNION/train/UNION_00942
9438 MONTHS/train/MONTHS_00733
9438 MILLION/train/MILLION_00627
9438 SINCE/train/SINCE_00936
9438 SERVICE/train/SERVICE_00264
9438 HOSPITAL/train/HOSPITAL_00176
9438 FOLLOWING/train/FOLLOWING_00599
9438 WHICH/train/WHICH_00145
9438 YESTERDAY/train/YESTERDAY_00654
9438 CRISIS/train/CRISIS_00604
9438 GUILTY/train/GUILTY_00510
9438 WANTED/train/WANTED_00050
9438 BENEFITS/train/BENEFITS_00768
9438 CALLED/train/CALLED_00587
9438 STAFF/train/STAFF_00439
9438 SOCIETY/train/SOCIETY_00897
9438 REPORTS/train/REPORTS_00810
9438 PRIVATE/train/PRIVATE_00912
9438 ANOTHER/train/ANOTHER_00252
9438 CALLED/train/CALLED_00651
9438 AGREEMENT/train/AGREEMENT_00704
9438 HOMES/train/HOMES_00786
9438 SOUTHERN/train/SOUTHERN_00596
9438 MATTER/train/MATTER_00742
9438 GREECE/train/GREECE_00233
9438 TRIAL/train/TRIAL_00742
9438 REPORT/train/REPORT_00536
9438 CHILD/train/CHILD_00660
9438 JAMES/train/JAMES_00684
9438 BEFORE/train/BEFORE_00163
9438 MILLION/train/MILLION_00636
9438 ECONOMIC/train/ECONOMIC_00061
9438 MILLION/train/MILLION_00254
9438 FAMILY/train/FAMILY_00760
9438 WALES/train/WALES_00861
9438 CASES/train/CASES_00127
9438 BORDER/train/BORDER_00783
9438 SECRETARY/train/SECRETARY_00461
9438 AHEAD/test/AHEAD_00005
9438 RECORD/train/RECORD_00263
9438 SPEECH/train/SPEECH_00834
9438 PARTS/train/PARTS_00293
9438 SERIOUS/train/SERIOUS_00853
9438 CALLED/train/CALLED_00721
9438 TODAY/train/TODAY_00513
9438 FOUND/train/FOUND_00449
9438 FRENCH/train/FRENCH_00621
9438 THREAT/train/THREAT_00446
9438 WOMEN/train/WOMEN_00815
9438 COMPANY/train/COMPANY_00719
9438 TONIGHT/train/TONIGHT_00335
9438 BORDER/train/BORDER_00315
9438 AFRICA/test/AFRICA_00004
9438 ACCORDING/train/ACCORDING_00368
9438 PRESIDENT/train/PRESIDENT_00172
9438 SPEECH/train/SPEECH_00266
9438 BORDER/train/BORDER_00265
9438 SENIOR/train/SENIOR_00440
9438 AMOUNT/train/AMOUNT_00881
9438 SEVERAL/train/SEVERAL_00166
9438 WHICH/train/WHICH_00964
9438 REPORTS/train/REPORTS_00344
9438 WESTMINSTER/train/WESTMINSTER_00479
9438 CAMERON/train/CAMERON_00936
9438 ACROSS/train/ACROSS_00933
9438 AUTHORITIES/train/AUTHORITIES_00628
9438 USING/train/USING_00819
9438 YEARS/train/YEARS_00002
9438 PRESIDENT/train/PRESIDENT_00289
9438 AROUND/train/AROUND_00027
9438 ACCUSED/train/ACCUSED_00598
9438 CONCERNS/train/CONCERNS_00609
9438 CONFERENCE/train/CONFERENCE_00748
9438 LIVING/train/LIVING_00662
9438 INDEPENDENT/train/INDEPENDENT_00940
9438 FAMILY/train/FAMILY_00021
9438 REPORTS/train/REPORTS_00641
9438 MILLION/train/MILLION_00762
9438 CRISIS/test/CRISIS_00016
9438 COMPANIES/train/COMPANIES_00594
9438 BIGGEST/train/BIGGEST_00710
9438 GREECE/train/GREECE_00503
9438 BROUGHT/train/BROUGHT_00372
9438 MORNING/train/MORNING_00913
9438 BUILDING/train/BUILDING_00697
9438 WATER/train/WATER_00611
9438 GUILTY/train/GUILTY_00405
9438 HAPPEN/train/HAPPEN_00882
9438 JAMES/train/JAMES_00846
9438 CONTROL/train/CONTROL_00184
9438 AFTER/train/AFTER_00122
9438 THERE/train/THERE_00109
9438 JUSTICE/train/JUSTICE_00349
9438 GUILTY/train/GUILTY_00763
9438 JAMES/train/JAMES_00344
9438 FINAL/train/FINAL_00391
9438 LIVING/train/LIVING_00438
9438 HEART/train/HEART_00057
9438 AHEAD/train/AHEAD_00107
9438 ALLEGATIONS/train/ALLEGATIONS_00655
9438 AGAINST/train/AGAINST_00640
9438 POSITION/train/POSITION_00933
9438 AMOUNT/train/AMOUNT_00850
9438 POTENTIAL/test/POTENTIAL_00039
9438 TOMORROW/train/TOMORROW_00047
9438 HIGHER/train/HIGHER_00382
9438 SYRIAN/train/SYRIAN_00579
9438 CAMERON/train/CAMERON_00698
9438 WHERE/train/WHERE_00338
9438 CHARGES/train/CHARGES_00325
9438 STATEMENT/train/STATEMENT_00508
9438 COUNCIL/train/COUNCIL_00524
9438 VIOLENCE/train/VIOLENCE_00715
9438 NORTH/train/NORTH_00977
9438 WANTS/train/WANTS_00618
9438 BENEFIT/train/BENEFIT_00911
9438 HISTORY/train/HISTORY_00338
9438 WORKERS/train/WORKERS_00040
9438 STORY/train/STORY_00386
9438 ALLEGATIONS/train/ALLEGATIONS_00049
9438 ACCORDING/train/ACCORDING_00083
9438 SPEAKING/train/SPEAKING_00591
9438 DETAILS/train/DETAILS_00939
9438 KNOWN/train/KNOWN_00620
9438 THREE/train/THREE_00214
9438 BRITAIN/train/BRITAIN_00998
9438 USING/train/USING_00237
9438 TAKING/train/TAKING_00599
9438 FIRST/train/FIRST_00258
9438 WORST/train/WORST_00279
9438 PARENTS/train/PARENTS_00651
9438 BRITAIN/train/BRITAIN_00109
9438 ACCESS/train/ACCESS_00510
9438 LIVES/train/LIVES_00896
9438 EUROPE/train/EUROPE_00847
9438 FINAL/train/FINAL_00689
9438 ASKING/train/ASKING_00970
9438 FORWARD/train/FORWARD_00651
9438 TRIAL/test/TRIAL_00025
9438 ARRESTED/train/ARRESTED_00926
9438 COUNCIL/train/COUNCIL_00276
9438 RUSSIAN/train/RUSSIAN_00468
9438 GIVING/train/GIVING_00368
9438 WARNING/train/WARNING_00887
9438 SCHOOL/train/SCHOOL_00182
9438 OBAMA/train/OBAMA_00356
9438 HUNDREDS/train/HUNDREDS_00012
9438 FIGURES/train/FIGURES_00840
9438 CASES/train/CASES_00462
9438 FOOTBALL/train/FOOTBALL_00716
9438 NUMBERS/train/NUMBERS_00413
9438 MILLION/train/MILLION_00831
9438 THOUSANDS/train/THOUSANDS_00269
9438 STAND/train/STAND_00875
9438 ACTION/train/ACTION_00275
9438 WALES/train/WALES_00237
9438 AMONG/train/AMONG_00032
9438 RIGHTS/train/RIGHTS_00732
9438 TONIGHT/train/TONIGHT_00687
9438 LIVES/train/LIVES_00674
9438 ECONOMIC/train/ECONOMIC_00340
9438 MESSAGE/train/MESSAGE_00883
9438 CLOSE/train/CLOSE_00817
9438 OTHER/train/OTHER_00137
9438 ATTACKS/train/ATTACKS_00442
9438 INDUSTRY/train/INDUSTRY_00487
9438 MILLIONS/train/MILLIONS_00758
9438 GUILTY/train/GUILTY_00531
9438 FIGURES/train/FIGURES_00119
9438 SCOTLAND/train/SCOTLAND_00901
9438 GIVEN/train/GIVEN_00801
9438 ALMOST/train/ALMOST_00003
9438 EMERGENCY/train/EMERGENCY_00635
9438 QUESTION/train/QUESTION_00724
9438 DESPITE/train/DESPITE_00138
9438 HEARD/train/HEARD_00693
9438 KILLED/train/KILLED_00384
9438 LONDON/train/LONDON_00033
9438 FORMER/train/FORMER_00178
9438 MARKET/train/MARKET_00600
9438 FOOTBALL/train/FOOTBALL_00816
9438 HOUSE/train/HOUSE_00198
9438 SECOND/train/SECOND_00597
9438 IRELAND/train/IRELAND_00826
9438 AUTHORITIES/train/AUTHORITIES_00110
9438 STORY/train/STORY_00419
9438 WORKERS/train/WORKERS_00485
9438 RUSSIAN/train/RUSSIAN_00892
9438 BRING/train/BRING_00648
9438 OFFICIALS/train/OFFICIALS_00269
9438 AFFECTED/train/AFFECTED_00466
9438 ECONOMY/train/ECONOMY_00451
9438 WALES/train/WALES_00946
9438 IMPACT/train/IMPACT_00868
9438 WHICH/train/WHICH_00079
9438 AGAIN/train/AGAIN_00302
9438 BIGGEST/train/BIGGEST_00494
9438 EDITOR/train/EDITOR_00934
9438 LATEST/train/LATEST_00219
9438 LATEST/train/LATEST_00222
9438 ANNOUNCED/train/ANNOUNCED_00565
9438 CURRENT/train/CURRENT_00223
9438 WOMEN/train/WOMEN_00418
9438 WITHOUT/train/WITHOUT_00034
9438 CONFLICT/train/CONFLICT_00468
9438 SERIOUS/train/SERIOUS_00891
9438 BANKS/train/BANKS_00495
9438 AFFAIRS/train/AFFAIRS_00240
9438 EDITOR/train/EDITOR_00643
9438 POWER/train/POWER_00116
9438 DIFFERENCE/train/DIFFERENCE_00596
9438 ORDER/train/ORDER_00327
9438 TRIAL/test/TRIAL_00043
9438 SPEAKING/train/SPEAKING_00833
9438 MILLION/train/MILLION_00722
9438 REMEMBER/train/REMEMBER_00038
9438 AMERICAN/train/AMERICAN_00204
9438 SINGLE/train/SINGLE_00347
9438 RULES/val/RULES_00047
9438 WELFARE/train/WELFARE_00603
9438 ACCESS/train/ACCESS_00444
9438 CHALLENGE/train/CHALLENGE_00403
9438 STAFF/train/STAFF_00090
9438 FOLLOWING/train/FOLLOWING_00926
9438 TALKING/train/TALKING_00327
9438 AMONG/val/AMONG_00047
9438 AGREEMENT/train/AGREEMENT_00543
9438 SCOTTISH/train/SCOTTISH_00414
9438 STATES/train/STATES_00861
9438 SPENDING/train/SPENDING_00836
9438 SPECIAL/train/SPECIAL_00230
9438 CONFLICT/train/CONFLICT_00405
9438 OTHER/train/OTHER_00420
9438 POLITICAL/train/POLITICAL_00162
9438 WORLD/train/WORLD_00764
9438 WANTED/train/WANTED_00587
9438 WEAPONS/train/WEAPONS_00070
9438 KILLED/train/KILLED_00289
9438 OFFICERS/train/OFFICERS_00323
9438 CURRENT/train/CURRENT_00413
9438 PRISON/train/PRISON_00146
9438 FOREIGN/train/FOREIGN_00308
9438 LATEST/train/LATEST_00737
9438 ABUSE/train/ABUSE_00549
9438 BENEFIT/train/BENEFIT_00761
9438 KILLED/train/KILLED_00018
9438 MINUTES/train/MINUTES_00845
9438 LEGAL/train/LEGAL_00482
9438 WELCOME/train/WELCOME_00601
9438 LARGE/train/LARGE_00074
9438 ALMOST/train/ALMOST_00208
9438 ALMOST/train/ALMOST_00362
9438 QUESTIONS/train/QUESTIONS_00125
9438 TIMES/train/TIMES_00595
9438 HUNDREDS/train/HUNDREDS_00472
9438 HUNDREDS/train/HUNDREDS_00770
9438 POWER/train/POWER_00546
9438 JAMES/train/JAMES_00367
9438 ECONOMIC/train/ECONOMIC_00936
9438 FRIDAY/train/FRIDAY_00011
9438 MAJOR/train/MAJOR_00104
9438 GROWING/train/GROWING_00099
9438 COMPANY/test/COMPANY_00020
9438 MOMENT/train/MOMENT_00688
9438 LONDON/train/LONDON_00522
9438 HOSPITAL/train/HOSPITAL_00007
9438 RECENT/train/RECENT_00725
9438 SEVEN/train/SEVEN_00737
9438 FORCES/train/FORCES_00905
9438 MEDICAL/train/MEDICAL_00338
9438 SPENT/train/SPENT_00394
9438 ARRESTED/train/ARRESTED_00940
9438 MISSING/train/MISSING_00050
9438 ANNOUNCED/train/ANNOUNCED_00755
9438 LATEST/train/LATEST_00583
9438 LEGAL/train/LEGAL_00128
9438 ABOUT/train/ABOUT_00487
9438 DIFFICULT/train/DIFFICULT_00228
9438 RESPONSE/train/RESPONSE_00824
9438 SINGLE/train/SINGLE_00189
9438 RIGHTS/train/RIGHTS_00554
9438 EVERY/train/EVERY_00210
9438 CONCERNS/train/CONCERNS_00200
9438 CONCERNS/train/CONCERNS_00073
9438 WALES/train/WALES_00030
9438 GAMES/train/GAMES_00021
9438 CLAIMS/train/CLAIMS_00127
9438 INVOLVED/train/INVOLVED_00954
9438 BRITISH/train/BRITISH_00164
9438 OFFICE/train/OFFICE_00728
9438 FORCE/train/FORCE_00241
9438 DURING/train/DURING_00441
9438 CONTROL/train/CONTROL_00246
9438 TAKEN/train/TAKEN_00813
9438 RATES/train/RATES_00002
9438 POTENTIAL/train/POTENTIAL_00634
9438 BEFORE/train/BEFORE_00883
9438 MAJOR/train/MAJOR_00725
9438 SPECIAL/train/SPECIAL_00207
9438 COMPANIES/train/COMPANIES_00699
9438 CRIME/train/CRIME_00499
9438 MURDER/train/MURDER_00561
9438 CHIEF/train/CHIEF_00219
9438 STORY/train/STORY_00148
9438 COURT/train/COURT_00388
9438 RUNNING/train/RUNNING_00990
9438 JUSTICE/train/JUSTICE_00808
9438 AFFAIRS/train/AFFAIRS_00466
9438 WHERE/train/WHERE_00381
9438 MONTH/train/MONTH_00663
9438 MEETING/train/MEETING_00585
9438 ANNOUNCED/train/ANNOUNCED_00487
9438 SOCIAL/train/SOCIAL_00371
9438 SPENDING/train/SPENDING_00055
9438 BLACK/train/BLACK_00087
9438 BROUGHT/train/BROUGHT_00696
9438 PRESS/train/PRESS_00346
9438 AFFAIRS/train/AFFAIRS_00603
9438 ECONOMIC/train/ECONOMIC_00860
9438 CHINA/train/CHINA_00571
9438 BUILDING/test/BUILDING_00041
9438 CALLED/train/CALLED_00946
9438 MINUTES/train/MINUTES_00930
9438 SERVICES/train/SERVICES_00008
9438 FOUND/train/FOUND_00020
9438 EUROPEAN/train/EUROPEAN_00900
9438 MAJOR/train/MAJOR_00984
9438 ECONOMY/train/ECONOMY_00306
9438 COURSE/train/COURSE_00701
9438 EVENING/train/EVENING_00293
9438 ASKING/train/ASKING_00457
9438 FORCES/train/FORCES_00566
9438 FAMILY/train/FAMILY_00697
9438 GREECE/train/GREECE_00548
9438 JAMES/train/JAMES_00368
9438 OFFICERS/train/OFFICERS_00431
9438 STAFF/train/STAFF_00481
9438 SEVEN/train/SEVEN_00184
9438 CAMPAIGN/train/CAMPAIGN_00867
9438 OTHER/train/OTHER_00914
9438 TOMORROW/train/TOMORROW_00859
9438 WINDS/train/WINDS_00005
9438 WORLD/train/WORLD_00518
9438 WHILE/train/WHILE_00524
9438 ENGLAND/train/ENGLAND_00928
9438 ANOTHER/train/ANOTHER_00826
9438 OFFICERS/train/OFFICERS_00458
9438 FAMILIES/train/FAMILIES_00879
9438 AROUND/train/AROUND_00840
9438 INDUSTRY/train/INDUSTRY_00778
9438 FOLLOWING/train/FOLLOWING_00040
9438 TAKEN/train/TAKEN_00580
9438 CHALLENGE/train/CHALLENGE_00154
9438 ACTION/train/ACTION_00596
9438 ACCUSED/train/ACCUSED_00308
9438 COMES/test/COMES_00032
9438 HUNDREDS/train/HUNDREDS_00152
9438 ACCUSED/train/ACCUSED_00507
9438 MINUTES/train/MINUTES_00966
9438 DIFFICULT/train/DIFFICULT_00869
9438 CONCERNS/train/CONCERNS_00075
9438 COMES/train/COMES_00306
9438 MONTHS/train/MONTHS_00787
9438 FORCES/train/FORCES_00370
9438 LABOUR/train/LABOUR_00078
9438 UNITED/train/UNITED_00511
9438 QUESTIONS/train/QUESTIONS_00799
9438 EMERGENCY/train/EMERGENCY_00650
9438 POWER/train/POWER_00611
9438 ABUSE/train/ABUSE_00638
9438 WITHOUT/train/WITHOUT_00704
9438 HEALTH/train/HEALTH_00304
9438 STREET/train/STREET_00732
9438 OBAMA/train/OBAMA_00237
9438 CHANGES/train/CHANGES_00807
9438 MILLIONS/train/MILLIONS_00528
9438 SERIES/train/SERIES_00437
9438 SYRIAN/train/SYRIAN_00800
9438 KILLED/train/KILLED_00399
9438 LEADER/train/LEADER_00805
9438 OPPOSITION/train/OPPOSITION_00450
9438 PRICE/train/PRICE_00700
9438 PAYING/train/PAYING_00401
9438 DIFFERENCE/train/DIFFERENCE_00702
9438 WORKING/train/WORKING_00441
9438 ECONOMIC/train/ECONOMIC_00261
9438 MILLIONS/train/MILLIONS_00487
9438 CLOSE/train/CLOSE_00950
9438 FOUND/test/FOUND_00002
9438 BUILD/train/BUILD_00220
9438 WITHOUT/train/WITHOUT_00700
9438 REPORTS/train/REPORTS_00447
9438 COMPANY/train/COMPANY_00738
9438 CENTRAL/train/CENTRAL_00159
9438 EVIDENCE/train/EVIDENCE_00163
9438 FRIDAY/train/FRIDAY_00740
9438 TONIGHT/train/TONIGHT_00331
9438 OBAMA/train/OBAMA_00285
9438 CANCER/train/CANCER_00615
9438 COULD/train/COULD_00020
9438 ENGLAND/train/ENGLAND_00159
9438 SINCE/train/SINCE_00351
9438 YESTERDAY/train/YESTERDAY_00645
9438 SYSTEM/train/SYSTEM_00412
9438 THERE/train/THERE_00241
9438 SECURITY/train/SECURITY_00212
9438 STORY/train/STORY_00893
9438 INQUIRY/train/INQUIRY_00566
9438 MIGRANTS/train/MIGRANTS_00294
9438 BRITAIN/train/BRITAIN_00980
9438 PERSON/train/PERSON_00892
9438 DESCRIBED/train/DESCRIBED_00085
9438 OPERATION/train/OPERATION_00510
9438 LATEST/train/LATEST_00216
9438 CONTINUE/train/CONTINUE_00950
9438 MONEY/train/MONEY_00488
9438 DAVID/train/DAVID_00495
9438 THROUGH/train/THROUGH_00534
9438 SINCE/train/SINCE_00916
9438 HOMES/train/HOMES_00671
9438 FOLLOWING/train/FOLLOWING_00927
9438 SIDES/train/SIDES_00198
9438 CHARGE/train/CHARGE_00360
9438 DETAILS/train/DETAILS_00701
9438 RUSSIAN/train/RUSSIAN_00408
9438 BLACK/train/BLACK_00711
9438 MEETING/train/MEETING_00254
9438 PRICE/train/PRICE_00832
9438 BRITAIN/train/BRITAIN_00626
9438 WELFARE/train/WELFARE_00068
9438 QUESTIONS/train/QUESTIONS_00988
9438 CALLED/train/CALLED_00067
9438 PLANS/train/PLANS_00978
9438 AMERICAN/train/AMERICAN_00248
9438 MILITARY/train/MILITARY_00684
9438 BUILD/train/BUILD_00329
9438 WELCOME/train/WELCOME_00201
9438 NATIONAL/train/NATIONAL_00238
9438 SYRIA/train/SYRIA_00258
9438 REPORTS/train/REPORTS_00538
9438 SINGLE/train/SINGLE_00530
9438 WORKERS/train/WORKERS_00323
9438 ABUSE/train/ABUSE_00632
9438 BIGGEST/val/BIGGEST_00028
9438 LONDON/train/LONDON_00771
9438 ACCUSED/train/ACCUSED_00038
9438 THIRD/train/THIRD_00295
9438 FOUND/val/FOUND_00011
9438 DESPITE/train/DESPITE_00812
9438 COMPANY/train/COMPANY_00993
9438 TONIGHT/train/TONIGHT_00894
9438 RUSSIAN/train/RUSSIAN_00645
9438 KNOWN/train/KNOWN_00841
9438 THEMSELVES/train/THEMSELVES_00900
9438 SEVERAL/train/SEVERAL_00981
9438 HEARD/train/HEARD_00489
9438 MILITARY/train/MILITARY_00441
9438 HAVING/train/HAVING_00549
9438 WHETHER/train/WHETHER_00708
9438 PERIOD/train/PERIOD_00848
9438 COUNTRY/train/COUNTRY_00273
9438 WHETHER/train/WHETHER_00651
9438 GUILTY/train/GUILTY_00840
9438 PHONE/train/PHONE_00406
9438 STORY/train/STORY_00918
9438 INQUIRY/train/INQUIRY_00352
9438 AMONG/train/AMONG_00380
9438 WORKERS/train/WORKERS_00281
9438 OFTEN/train/OFTEN_00434
9438 TODAY/train/TODAY_00433
9438 ACCORDING/train/ACCORDING_00352
9438 EDITOR/train/EDITOR_00313
9438 INFORMATION/train/INFORMATION_00502
9438 HOURS/train/HOURS_00138
9438 PRISON/train/PRISON_00956
9438 CHARGE/test/CHARGE_00026
9438 MISSING/train/MISSING_00247
9438 FACING/train/FACING_00822
9438 EVIDENCE/train/EVIDENCE_00820
9438 FORCES/train/FORCES_00209
9438 EVIDENCE/train/EVIDENCE_00017
9438 GIVING/train/GIVING_00248
9438 TRUST/train/TRUST_00420
9438 SINGLE/train/SINGLE_00583
9438 FIGURES/train/FIGURES_00798
9438 DAVID/train/DAVID_00308
9438 CLEAR/train/CLEAR_00507
9438 JAMES/train/JAMES_00198
9438 BENEFIT/train/BENEFIT_00583
9438 STAFF/train/STAFF_00851
9438 TRIAL/train/TRIAL_00771
9438 GENERAL/train/GENERAL_00624
9438 WITHIN/train/WITHIN_00545
9438 HAPPEN/train/HAPPEN_00013
9438 COURT/train/COURT_00397
9438 PARTS/train/PARTS_00039
9438 GROWING/train/GROWING_00949
9438 LEAVE/train/LEAVE_00968
9438 ACTION/train/ACTION_00940
9438 MINUTES/train/MINUTES_00724
9438 ANOTHER/train/ANOTHER_00706
9438 AFFECTED/train/AFFECTED_00139
9438 BETTER/train/BETTER_00131
9438 WELCOME/train/WELCOME_00249
9438 IRELAND/train/IRELAND_00959
9438 RATES/train/RATES_00924
9438 EDUCATION/train/EDUCATION_00123
9438 USING/train/USING_00131
9438 DESPITE/train/DESPITE_00321
9438 YEARS/train/YEARS_00545
9438 TODAY/train/TODAY_00360
9438 ARRESTED/train/ARRESTED_00250
9438 FAMILY/train/FAMILY_00622
9438 PERSONAL/train/PERSONAL_00218
9438 MILLION/train/MILLION_00937
9438 SPENT/train/SPENT_00093
9438 ABUSE/test/ABUSE_00044
9438 INDUSTRY/train/INDUSTRY_00600
9438 HOURS/train/HOURS_00013
9438 AGAINST/train/AGAINST_00830
9438 INDUSTRY/train/INDUSTRY_00417
9438 FORCE/train/FORCE_00166
9438 FAMILY/train/FAMILY_00917
9438 WEAPONS/train/WEAPONS_00798
9438 FORCE/train/FORCE_00859
9438 COMPANIES/train/COMPANIES_00498
9438 LONDON/train/LONDON_00527
9438 DIFFERENCE/train/DIFFERENCE_00792
9438 PUBLIC/train/PUBLIC_00445
9438 BEING/train/BEING_00242
9438 KILLED/train/KILLED_00033
9438 EVENTS/train/EVENTS_00509
9438 DESCRIBED/train/DESCRIBED_00795
9438 HUMAN/train/HUMAN_00080
9438 CHIEF/train/CHIEF_00983
9438 PRISON/train/PRISON_00857
9438 RUNNING/train/RUNNING_00599
9438 USING/train/USING_00176
9438 SPECIAL/train/SPECIAL_00211
9438 YESTERDAY/test/YESTERDAY_00034
9438 CRISIS/train/CRISIS_00046
9438 POLICE/train/POLICE_00629
9438 WATER/train/WATER_00419
9438 LONDON/train/LONDON_00026
9438 AFFECTED/train/AFFECTED_00335
9438 FOUND/train/FOUND_00156
9438 MAKING/train/MAKING_00271
9438 BRITAIN/train/BRITAIN_00039
9438 DEATH/train/DEATH_00929
9438 PROCESS/train/PROCESS_00397
9438 EDITOR/train/EDITOR_00572
9438 BENEFIT/train/BENEFIT_00512
9438 ACCESS/train/ACCESS_00518
9438 AFFECTED/train/AFFECTED_00048
9438 CHIEF/train/CHIEF_00301
9438 FRENCH/train/FRENCH_00094
9438 EXPECT/train/EXPECT_00613
9438 SPENDING/train/SPENDING_00182
9438 COURT/train/COURT_00084
9438 LATEST/train/LATEST_00315
9438 SCHOOL/train/SCHOOL_00704
9438 DESCRIBED/train/DESCRIBED_00962
9438 COURT/train/COURT_00771
9438 AREAS/train/AREAS_00356
9438 BANKS/train/BANKS_00626
9438 REPORT/train/REPORT_00309
9438 PRIME/train/PRIME_00631
9438 AFFECTED/train/AFFECTED_00357
9438 BECAUSE/train/BECAUSE_00413
9438 ABSOLUTELY/train/ABSOLUTELY_00012
9438 STILL/train/STILL_00511
9438 CAPITAL/train/CAPITAL_00096
9438 FOLLOWING/train/FOLLOWING_00010
9438 COURT/train/COURT_00121
9438 WESTMINSTER/train/WESTMINSTER_00306
9438 WELFARE/train/WELFARE_00354
9438 INQUIRY/train/INQUIRY_00630
9438 DESPITE/train/DESPITE_00353
9438 LATER/train/LATER_00441
9438 THREE/train/THREE_00497
9438 THROUGH/train/THROUGH_00302
9438 WORKERS/train/WORKERS_00885
9438 UNITED/train/UNITED_00024
9438 DETAILS/train/DETAILS_00019
9438 INDUSTRY/train/INDUSTRY_00822
9438 UNITED/train/UNITED_00213
9438 PROCESS/train/PROCESS_00863
9438 PATIENTS/train/PATIENTS_00590
9438 EUROPEAN/train/EUROPEAN_00402
9438 UNDER/train/UNDER_00565
9438 PATIENTS/train/PATIENTS_00412
9438 ALLOWED/train/ALLOWED_00472
9438 LEGAL/train/LEGAL_00745
9438 LATEST/train/LATEST_00800
9438 PROTECT/train/PROTECT_00730
9438 LEGAL/train/LEGAL_00490
9438 NATIONAL/train/NATIONAL_00404
9438 STAFF/train/STAFF_00147
9438 SENIOR/train/SENIOR_00776
9438 LOOKING/train/LOOKING_00989
9438 JUSTICE/train/JUSTICE_00793
9438 CHANGES/train/CHANGES_00352
9438 CHIEF/train/CHIEF_00737
9438 JUDGE/train/JUDGE_00315
9438 WHILE/train/WHILE_00113
9438 PHONE/train/PHONE_00182
9438 CALLED/train/CALLED_00397
9438 WINDS/train/WINDS_00467
9438 ENGLAND/train/ENGLAND_00992
9438 LATEST/val/LATEST_00011
9438 SCOTTISH/train/SCOTTISH_00815
9438 CHIEF/train/CHIEF_00267
9438 OPPOSITION/train/OPPOSITION_00785
9438 CONCERNS/train/CONCERNS_00215
9438 WHERE/train/WHERE_00387
9438 STREET/train/STREET_00576
9438 NIGHT/train/NIGHT_00151
9438 CHIEF/train/CHIEF_00015
9438 OUTSIDE/train/OUTSIDE_00232
9438 SPEAKING/train/SPEAKING_00119
9438 CHIEF/train/CHIEF_00286
9438 SPECIAL/train/SPECIAL_00072
9438 NIGHT/train/NIGHT_00221
9438 WORKERS/train/WORKERS_00682
9438 BRITAIN/train/BRITAIN_00960
9438 LONGER/train/LONGER_00547
9438 MANCHESTER/train/MANCHESTER_00425
9438 TRYING/train/TRYING_00357
9438 NUMBERS/train/NUMBERS_00095
9438 SENSE/train/SENSE_00954
9438 HOSPITAL/train/HOSPITAL_00579
9438 FOOTBALL/train/FOOTBALL_00082
9438 PERSONAL/train/PERSONAL_00205
9438 USING/train/USING_00478
9438 ALMOST/train/ALMOST_00673
9438 POLITICAL/train/POLITICAL_00687
9438 WARNING/train/WARNING_00630
9438 WOMEN/train/WOMEN_00641
9438 PHONE/train/PHONE_00835
9438 MONTHS/train/MONTHS_00163
9438 PLANS/train/PLANS_00445
9438 RATHER/train/RATHER_00636
9438 INQUIRY/train/INQUIRY_00391
9438 WARNING/train/WARNING_00910
9438 WESTMINSTER/train/WESTMINSTER_00451
9438 MINISTERS/train/MINISTERS_00840
9438 EDITOR/train/EDITOR_00859
9438 WORST/train/WORST_00624
9438 POTENTIAL/train/POTENTIAL_00299
9438 BUILD/train/BUILD_00348
9438 OFFICERS/train/OFFICERS_00963
9438 SERIES/train/SERIES_00355
9438 FINANCIAL/train/FINANCIAL_00125
9438 SERVICE/train/SERVICE_00539
9438 PRESSURE/train/PRESSURE_00903
9438 SECRETARY/train/SECRETARY_00598
9438 WHETHER/train/WHETHER_00144
9438 EDITOR/train/EDITOR_00517
9438 WORKING/train/WORKING_00427
9438 ENERGY/train/ENERGY_00141
9438 EXPECTED/train/EXPECTED_00199
9438 PRESIDENT/train/PRESIDENT_00388
9438 AFRICA/train/AFRICA_00953
9438 ACCORDING/train/ACCORDING_00347
9438 COURT/train/COURT_00901
9438 FORMER/train/FORMER_00776
9438 DECISION/train/DECISION_00256
9438 PHONE/train/PHONE_00962
9438 GAMES/train/GAMES_00363
9438 EXACTLY/train/EXACTLY_00660
9438 WARNING/train/WARNING_00176
9438 OPPOSITION/train/OPPOSITION_00669
9438 FURTHER/train/FURTHER_00480
9438 HOURS/train/HOURS_00949
9438 ALMOST/train/ALMOST_00444
9438 ACCUSED/train/ACCUSED_00760
9438 GUILTY/train/GUILTY_00478
9438 REFERENDUM/train/REFERENDUM_00071
9438 GUILTY/train/GUILTY_00593
9438 PRESSURE/train/PRESSURE_00929
9438 OUTSIDE/train/OUTSIDE_00014
9438 SECURITY/train/SECURITY_00696
9438 AGAINST/train/AGAINST_00462
9438 YEARS/train/YEARS_00847
9438 FOOTBALL/train/FOOTBALL_00527
9438 YESTERDAY/test/YESTERDAY_00011
9438 WORST/train/WORST_00092
9438 LATER/train/LATER_00278
9438 PHONE/train/PHONE_00741
9438 UNITED/train/UNITED_00979
9438 INTEREST/train/INTEREST_00517
9438 LIVING/test/LIVING_00029
9438 REPORT/train/REPORT_00052
9438 THOSE/train/THOSE_00744
9438 AFFAIRS/train/AFFAIRS_00664
9438 MANCHESTER/train/MANCHESTER_00016
9438 VICTIMS/train/VICTIMS_00899
9438 MONTHS/train/MONTHS_00050
9438 PARENTS/train/PARENTS_00441
9438 ACCORDING/train/ACCORDING_00071
9438 TIMES/train/TIMES_00096
9438 AMERICAN/train/AMERICAN_00213
9438 DESCRIBED/train/DESCRIBED_00127
9438 ANNOUNCED/train/ANNOUNCED_00722
9438 RESULT/train/RESULT_00621
9438 SECTOR/train/SECTOR_00509
9438 GAMES/train/GAMES_00607
9438 ATTACK/train/ATTACK_00316
9438 WITHIN/train/WITHIN_00260
9438 USING/train/USING_00161
9438 LEAST/train/LEAST_00924
9438 AROUND/train/AROUND_00302
9438 DURING/train/DURING_00409
9438 MILLIONS/train/MILLIONS_00046
9438 INFLATION/train/INFLATION_00755
9438 HOUSE/train/HOUSE_00730
9438 OUTSIDE/train/OUTSIDE_00507
9438 WAITING/test/WAITING_00047
9438 PRISON/train/PRISON_00287
9438 HEARD/train/HEARD_00013
9438 CRISIS/train/CRISIS_00188
9438 RECORD/train/RECORD_00194
9438 CHILD/train/CHILD_00016
9438 HOUSE/train/HOUSE_00840
9438 LEADERS/train/LEADERS_00082
9438 MURDER/train/MURDER_00867
9438 DESCRIBED/train/DESCRIBED_00451
9438 PROCESS/train/PROCESS_00251
9438 FIRST/train/FIRST_00540
9438 EDUCATION/train/EDUCATION_00781
9438 ALREADY/train/ALREADY_00531
9438 BUILDING/train/BUILDING_00502
9438 WAITING/train/WAITING_00164
9438 ASKING/val/ASKING_00036
9438 POLICE/train/POLICE_00713
9438 SPENT/train/SPENT_00431
9438 OFFICE/train/OFFICE_00241
9438 ATTACKS/train/ATTACKS_00332
9438 MILLIONS/train/MILLIONS_00288
9438 CLOSE/train/CLOSE_00083
9438 FUTURE/test/FUTURE_00003
9438 WESTMINSTER/test/WESTMINSTER_00002
9438 SINCE/train/SINCE_00889
9438 REMEMBER/train/REMEMBER_00574
9438 MEDIA/train/MEDIA_00064
9438 OFFICERS/train/OFFICERS_00709
9438 SECRETARY/train/SECRETARY_00982
9438 EARLY/train/EARLY_00524
9438 BRITISH/train/BRITISH_00635
9438 LEADER/train/LEADER_00081
9438 AMERICAN/train/AMERICAN_00998
9438 POWERS/train/POWERS_00154
9438 ALLEGATIONS/train/ALLEGATIONS_00877
9438 AGAINST/train/AGAINST_00768
9438 ACCUSED/train/ACCUSED_00418
9438 CHANGES/test/CHANGES_00012
9438 PRICE/train/PRICE_00649
9438 ENERGY/train/ENERGY_00061
9438 PRESS/train/PRESS_00783
9438 YEARS/train/YEARS_00049
9438 TRIAL/train/TRIAL_00255
9438 LOOKING/test/LOOKING_00002
9438 BLACK/train/BLACK_00414
9438 WARNING/train/WARNING_00463
9438 CAPITAL/train/CAPITAL_00321
9438 ECONOMY/train/ECONOMY_00641
9438 STARTED/train/STARTED_00382
9438 THIRD/train/THIRD_00607
9438 DAVID/train/DAVID_00872
9438 SERVICE/train/SERVICE_00974
9438 ACCUSED/test/ACCUSED_00048
9438 LEADER/test/LEADER_00038
9438 JUDGE/train/JUDGE_00370
9438 ASKING/train/ASKING_00069
9438 THREE/train/THREE_00310
9438 OFTEN/train/OFTEN_00657
9438 ATTACK/train/ATTACK_00547
9438 REPORTS/train/REPORTS_00070
9438 HOURS/train/HOURS_00844
9438 RESULT/train/RESULT_00641
9438 DETAILS/train/DETAILS_00462
9438 WELCOME/test/WELCOME_00034
9438 BILLION/train/BILLION_00781
9438 STREET/train/STREET_00969
9438 NATIONAL/train/NATIONAL_00095
9438 NIGHT/train/NIGHT_00525
9438 FORCE/train/FORCE_00875
9438 INCREASE/train/INCREASE_00607
9438 SOUTHERN/train/SOUTHERN_00794
9438 COUNCIL/train/COUNCIL_00068
9438 STREET/train/STREET_00788
9438 LEADER/test/LEADER_00009
9438 COURT/train/COURT_00199
9438 WINDS/train/WINDS_00070
9438 CHILDREN/train/CHILDREN_00596
9438 HEALTH/train/HEALTH_00955
9438 MONTH/train/MONTH_00227
9438 DEATH/train/DEATH_00130
9438 SEEMS/train/SEEMS_00059
9438 EASTERN/train/EASTERN_00298
9438 GROUP/train/GROUP_00828
9438 MONTHS/train/MONTHS_00664
9438 MILLIONS/train/MILLIONS_00069
9438 WELFARE/test/WELFARE_00013
9438 CONSERVATIVE/train/CONSERVATIVE_00099
9438 LONDON/train/LONDON_00294
9438 MILLIONS/train/MILLIONS_00085
9438 AREAS/train/AREAS_00520
9438 PARTY/train/PARTY_00969
9438 FAMILY/train/FAMILY_00407
9438 EXPECTED/test/EXPECTED_00033
9438 SERVICE/train/SERVICE_00121
9438 PHONE/train/PHONE_00933
9438 AFFAIRS/train/AFFAIRS_00856
9438 MURDER/train/MURDER_00145
9438 MEDICAL/train/MEDICAL_00294
9438 DEATH/train/DEATH_00613
9438 MEETING/train/MEETING_00429
9438 SECOND/train/SECOND_00981
9438 LATER/train/LATER_00424
9438 DAVID/train/DAVID_00803
9438 OFFICERS/train/OFFICERS_00762
9438 GROUND/train/GROUND_00385
9438 GIVEN/train/GIVEN_00465
9438 SHORT/train/SHORT_00652
9438 IMMIGRATION/train/IMMIGRATION_00843
9438 GOVERNMENT/train/GOVERNMENT_00923
9438 THREE/train/THREE_00834
9438 INVOLVED/train/INVOLVED_00200
9438 MAKES/train/MAKES_00615
9438 FORWARD/train/FORWARD_00935
9438 FINANCIAL/train/FINANCIAL_00773
9438 MEDIA/train/MEDIA_00666
9438 THERE/train/THERE_00752
9438 FOUND/train/FOUND_00232
9438 COURT/train/COURT_00398
9438 ARRESTED/train/ARRESTED_00768
9438 MOVING/train/MOVING_00785
9438 WATCHING/test/WATCHING_00045
9438 FOUND/train/FOUND_00605
9438 CLAIMS/train/CLAIMS_00531
9438 RESPONSE/train/RESPONSE_00445
9438 WANTS/train/WANTS_00556
9438 STILL/train/STILL_00841
9438 ACCUSED/train/ACCUSED_00113
9438 FACING/train/FACING_00155
9438 OFFICE/train/OFFICE_00323
9438 SERIES/train/SERIES_00117
9438 HIGHER/train/HIGHER_00097
9438 TAKING/train/TAKING_00608
9438 INQUIRY/train/INQUIRY_00918
9438 ACTION/train/ACTION_00948
9438 THERE/train/THERE_00304
9438 BRITISH/val/BRITISH_00023
9438 PERIOD/train/PERIOD_00838
9438 BEING/train/BEING_00228
9438 TONIGHT/train/TONIGHT_00107
9438 BILLION/train/BILLION_00097
9438 IRELAND/train/IRELAND_00035
9438 SPENT/train/SPENT_00617
9438 EVENING/train/EVENING_00439
9438 CONCERNS/train/CONCERNS_00700
9438 GIVING/train/GIVING_00061
9438 FOOTBALL/train/FOOTBALL_00778
9438 FORCE/train/FORCE_00492
9438 CALLED/train/CALLED_00217
9438 MILLION/train/MILLION_00977
9438 AFTERNOON/train/AFTERNOON_00850
9438 FOREIGN/train/FOREIGN_00229
9438 TOMORROW/train/TOMORROW_00965
9438 AFRICA/train/AFRICA_00536
9438 PRICES/train/PRICES_00202
9438 SOUTH/train/SOUTH_00130
9438 COULD/train/COULD_00820
9438 LATEST/train/LATEST_00924
9438 STREET/train/STREET_00307
9438 ACCORDING/train/ACCORDING_00192
9438 OFFICERS/train/OFFICERS_00602
9438 COMPANY/train/COMPANY_00712
9438 ENGLAND/train/ENGLAND_00353
9438 EDITOR/train/EDITOR_00081
9438 OFFICIALS/test/OFFICIALS_00026
9438 MEMBER/train/MEMBER_00098
9438 FOLLOWING/train/FOLLOWING_00762
9438 ATTACKS/train/ATTACKS_00733
9438 JAMES/train/JAMES_00134
9438 GEORGE/train/GEORGE_00752
9438 GEORGE/train/GEORGE_00520
9438 CLAIMS/train/CLAIMS_00416
9438 YEARS/train/YEARS_00451
9438 OPERATION/train/OPERATION_00551
9438 THREE/train/THREE_00473
9438 ENERGY/train/ENERGY_00851
9438 WEEKEND/train/WEEKEND_00997
9438 AGREEMENT/train/AGREEMENT_00605
9438 WORDS/train/WORDS_00289
9438 HOMES/train/HOMES_00265
9438 WHILE/train/WHILE_00918
9438 GETTING/train/GETTING_00577
9438 AHEAD/train/AHEAD_00146
9438 ITSELF/train/ITSELF_00719
9438 HEAVY/train/HEAVY_00227
9438 COMES/train/COMES_00625
9438 WALES/train/WALES_00570
9438 OPPOSITION/train/OPPOSITION_00154
9438 TIMES/train/TIMES_00215
9438 POLICE/train/POLICE_00263
9438 SECURITY/train/SECURITY_00744
9438 LATER/train/LATER_00687
9438 STREET/train/STREET_00596
9438 OUTSIDE/train/OUTSIDE_00689
9438 BIGGEST/train/BIGGEST_00487
9438 CRISIS/train/CRISIS_00210
9438 BEING/train/BEING_00876
9438 MEASURES/train/MEASURES_00516
9438 CHIEF/train/CHIEF_00938
9438 MEANS/train/MEANS_00602
9438 RIGHTS/train/RIGHTS_00099
9438 GUILTY/train/GUILTY_00514
9438 WARNING/train/WARNING_00631
9438 FUTURE/train/FUTURE_00450
9438 INVOLVED/train/INVOLVED_00642
9438 PRICE/train/PRICE_00925
9438 WELCOME/train/WELCOME_00343
9438 POLITICAL/train/POLITICAL_00317
9438 MEETING/train/MEETING_00767
9438 WATCHING/train/WATCHING_00152
9438 OTHERS/train/OTHERS_00987
9438 SECOND/train/SECOND_00524
9438 EVIDENCE/train/EVIDENCE_00277
9438 NORTH/train/NORTH_00214
9438 GREECE/train/GREECE_00086
9438 REPORTS/train/REPORTS_00953
9438 SCHOOL/train/SCHOOL_00614
9438 PRICES/train/PRICES_00462
9438 ASKING/test/ASKING_00037
9438 COURT/train/COURT_00472
9438 ANNOUNCED/train/ANNOUNCED_00299
9438 BUILD/train/BUILD_00584
9438 WEEKS/train/WEEKS_00181
9438 ATTACKS/train/ATTACKS_00304
9438 PROBLEMS/train/PROBLEMS_00476
9438 PERIOD/train/PERIOD_00407
9438 CHIEF/train/CHIEF_00904
9438 GUILTY/train/GUILTY_00369
9438 AMERICAN/train/AMERICAN_00130
9438 CHALLENGE/test/CHALLENGE_00016
9438 POLITICAL/train/POLITICAL_00969
9438 AFTER/train/AFTER_00500
9438 HOURS/train/HOURS_00231
9438 ENGLAND/train/ENGLAND_00628
9438 NORTH/train/NORTH_00764
9438 FOREIGN/train/FOREIGN_00259
9438 GROWING/train/GROWING_00110
9438 SYSTEM/train/SYSTEM_00388
9438 BUDGET/train/BUDGET_00391
9438 INQUIRY/train/INQUIRY_00320
9438 MINISTER/train/MINISTER_00987
9438 TOMORROW/train/TOMORROW_00441
9438 RUNNING/train/RUNNING_00830
9438 AMERICA/train/AMERICA_00204
9438 OTHER/train/OTHER_00176
9438 SINCE/train/SINCE_00283
9438 JUSTICE/train/JUSTICE_00140
9438 CONCERNS/train/CONCERNS_00251
9438 EDITOR/train/EDITOR_00795
9438 CONFLICT/train/CONFLICT_00232
9438 CONFLICT/train/CONFLICT_00718
9438 FRONT/train/FRONT_00949
9438 PARENTS/train/PARENTS_00673
9438 CHILD/train/CHILD_00353
9438 CONFLICT/train/CONFLICT_00640
9438 MINISTERS/train/MINISTERS_00565
9438 JUSTICE/train/JUSTICE_00484
9438 AMOUNT/train/AMOUNT_00290
9438 KILLED/train/KILLED_00319
9438 WORST/test/WORST_00047
9438 EVIDENCE/train/EVIDENCE_00489
9438 SERIOUS/train/SERIOUS_00625
9438 REPORTS/train/REPORTS_01000
9438 AFTERNOON/test/AFTERNOON_00042
9438 CHIEF/train/CHIEF_00649
9438 LEADER/train/LEADER_00077
9438 WESTMINSTER/train/WESTMINSTER_00107
9438 FRENCH/train/FRENCH_00078
9438 RECENT/train/RECENT_00024
9438 WATER/train/WATER_00180
9438 FAMILY/test/FAMILY_00031
9438 VICTIMS/train/VICTIMS_00870
9438 VICTIMS/train/VICTIMS_00519
9438 AFFAIRS/train/AFFAIRS_00837
9438 FAMILY/train/FAMILY_00832
9438 GUILTY/train/GUILTY_00102
9438 CONCERNS/train/CONCERNS_00302
9438 TODAY/train/TODAY_00269
9438 EVERY/train/EVERY_00078
9438 IRELAND/train/IRELAND_00915
9438 PLACE/train/PLACE_00018
9438 ACCUSED/train/ACCUSED_00822
9438 WITHOUT/train/WITHOUT_00007
9438 FINAL/test/FINAL_00006
9438 POLITICAL/train/POLITICAL_00286
9438 LOCAL/train/LOCAL_00132
9438 ARRESTED/train/ARRESTED_00786
9438 CASES/train/CASES_00601
9438 AMERICAN/train/AMERICAN_00911
9438 SPECIAL/train/SPECIAL_00204
9438 CHIEF/train/CHIEF_00850
9438 TODAY/train/TODAY_00396
9438 BENEFITS/train/BENEFITS_00590
9438 LEADER/train/LEADER_00599
9438 SERIOUS/train/SERIOUS_00679
9438 TOGETHER/train/TOGETHER_00162
9438 AGAINST/train/AGAINST_00372
9438 MURDER/train/MURDER_00594
9438 SYRIAN/train/SYRIAN_00276
9438 SERIOUS/train/SERIOUS_00289
9438 SPECIAL/train/SPECIAL_00579
9438 HISTORY/train/HISTORY_00228
9438 EXTRA/train/EXTRA_00278
9438 JAMES/train/JAMES_00816
9438 BRITAIN/train/BRITAIN_00123
9438 PLACES/train/PLACES_00299
9438 MURDER/train/MURDER_00849
9438 CHILD/train/CHILD_00042
9438 FAMILY/test/FAMILY_00042
9438 BENEFITS/train/BENEFITS_00146
9438 PUBLIC/train/PUBLIC_00319
9438 FRONT/train/FRONT_00339
9438 SYRIAN/train/SYRIAN_00257
9438 NUMBERS/train/NUMBERS_00730
9438 SECRETARY/train/SECRETARY_00297
9438 VICTIMS/train/VICTIMS_00415
9438 NUMBERS/test/NUMBERS_00050
9438 SEVERAL/train/SEVERAL_00608
9438 WHERE/train/WHERE_00370
9438 NUMBERS/train/NUMBERS_00519
9438 TRUST/train/TRUST_00675
9438 SHOULD/train/SHOULD_00332
9438 THOUGHT/train/THOUGHT_00983
9438 WORKERS/train/WORKERS_00937
9438 THOUSANDS/train/THOUSANDS_00417
9438 INDUSTRY/train/INDUSTRY_00503
9438 FOUND/train/FOUND_00321
9438 SENIOR/train/SENIOR_00444
9438 HOSPITAL/train/HOSPITAL_00477
9438 TOGETHER/train/TOGETHER_00924
9438 REPORTS/train/REPORTS_00747
9438 CHARGES/train/CHARGES_00900
9438 PRIVATE/train/PRIVATE_00353
9438 KILLED/train/KILLED_00479
9438 FRIDAY/train/FRIDAY_00176
9438 GUILTY/train/GUILTY_00034
9438 VOTERS/train/VOTERS_00438
9438 AFFAIRS/test/AFFAIRS_00033
9438 WORKERS/train/WORKERS_00362
9438 GEORGE/train/GEORGE_00032
9438 REPORTS/train/REPORTS_00798
9438 WHILE/train/WHILE_00051
9438 FIRST/train/FIRST_00033
9438 GROUP/train/GROUP_00321
9438 ABUSE/train/ABUSE_00380
9438 CONTINUE/train/CONTINUE_00185
9438 FIGURES/train/FIGURES_00375
9438 VIOLENCE/train/VIOLENCE_00501
9438 ASKING/train/ASKING_00836
9438 COULD/train/COULD_00883
9438 REPORT/train/REPORT_00082
9438 WHILE/train/WHILE_00204
9438 OPERATION/train/OPERATION_00346
9438 ACCESS/train/ACCESS_00799
9438 ATTACKS/train/ATTACKS_00341
9438 CHALLENGE/train/CHALLENGE_00514
9438 HISTORY/train/HISTORY_00387
9438 MINISTER/train/MINISTER_00297
9438 REFERENDUM/train/REFERENDUM_00802
9438 LABOUR/train/LABOUR_00553
9438 AFFAIRS/train/AFFAIRS_00294
9438 BRITISH/train/BRITISH_00210
9438 EXPECTED/train/EXPECTED_00888
9438 EARLY/train/EARLY_00247
9438 BEFORE/train/BEFORE_00793
9438 LONGER/train/LONGER_00486
9438 DEATH/train/DEATH_00139
9438 PARENTS/train/PARENTS_00559
9438 KILLED/train/KILLED_00501
9438 OPERATION/train/OPERATION_00406
9438 ALLOWED/train/ALLOWED_00473
9438 OPERATION/train/OPERATION_00103
9438 PARLIAMENT/test/PARLIAMENT_00024
9438 AMONG/train/AMONG_00819
9438 FAMILIES/train/FAMILIES_00539
9438 AFFAIRS/train/AFFAIRS_00809
9438 PRICES/train/PRICES_00750
9438 THOUSANDS/train/THOUSANDS_00312
9438 AUTHORITIES/train/AUTHORITIES_00210
9438 NORTH/train/NORTH_00416
9438 MORNING/train/MORNING_00435
9438 NORTH/train/NORTH_00795
9438 PHONE/train/PHONE_00705
9438 GAMES/train/GAMES_00691
9438 ACCESS/train/ACCESS_00684
9438 TOWARDS/train/TOWARDS_00012
9438 INDEPENDENT/train/INDEPENDENT_00409
9438 BLACK/train/BLACK_00090
9438 MESSAGE/train/MESSAGE_00372
9438 COURT/train/COURT_00346
9438 POINT/train/POINT_00710
9438 CALLED/train/CALLED_00441
9438 MEMBERS/train/MEMBERS_00660
9438 EVENING/val/EVENING_00036
9438 FORMER/train/FORMER_00852
9438 REPORTS/train/REPORTS_00142
9438 LATER/train/LATER_00774
9438 CHIEF/train/CHIEF_00685
9438 WITHIN/train/WITHIN_00918
9438 MONTHS/train/MONTHS_00669
9438 GENERAL/train/GENERAL_00461
9438 JUSTICE/train/JUSTICE_00258
9438 CHARGES/train/CHARGES_00948
9438 ECONOMY/train/ECONOMY_00456
9438 ABOUT/train/ABOUT_00310
9438 OTHERS/train/OTHERS_00579
9438 LEADERS/train/LEADERS_00941
9438 INQUIRY/train/INQUIRY_00728
9438 AFFAIRS/train/AFFAIRS_00264
9438 BILLION/train/BILLION_00061
9438 HOMES/train/HOMES_00030
9438 FORMER/train/FORMER_00738
9438 ALLOWED/train/ALLOWED_00524
9438 EDUCATION/train/EDUCATION_00094
9438 COURSE/train/COURSE_00571
9438 FORCES/train/FORCES_00770
9438 WELCOME/train/WELCOME_00069
9438 CAPITAL/train/CAPITAL_00086
9438 THREE/train/THREE_00538
9438 EASTERN/train/EASTERN_00462
9438 CANCER/train/CANCER_00205
9438 EMERGENCY/train/EMERGENCY_00116
9438 ABUSE/train/ABUSE_00489
9438 MIGRANTS/train/MIGRANTS_00582
9438 WELCOME/train/WELCOME_00096
9438 PARTY/train/PARTY_00384
9438 MORNING/train/MORNING_00599
9438 ATTACKS/train/ATTACKS_00238
9438 PLANS/train/PLANS_00004
9438 INQUIRY/train/INQUIRY_00770
9438 LONGER/train/LONGER_00419
9438 BEHIND/train/BEHIND_00460
9438 YESTERDAY/train/YESTERDAY_00261
9438 HUMAN/train/HUMAN_00198
9438 POLITICIANS/train/POLITICIANS_00571
9438 PRICES/train/PRICES_00269
9438 COMPANIES/train/COMPANIES_00151
9438 HEARD/train/HEARD_00900
9438 REPORTS/train/REPORTS_00269
9438 AMERICAN/train/AMERICAN_00457
9438 SENIOR/train/SENIOR_00361
9438 PHONE/train/PHONE_00103
9438 STAGE/train/STAGE_00772
9438 CHARGE/train/CHARGE_00689
9438 AUTHORITIES/train/AUTHORITIES_00421
9438 REPORTS/train/REPORTS_00584
9438 GUILTY/train/GUILTY_00148
9438 PROBABLY/train/PROBABLY_00519
9438 EVIDENCE/train/EVIDENCE_00907
9438 BUDGET/train/BUDGET_00519
9438 YESTERDAY/train/YESTERDAY_00806
9438 MINISTER/train/MINISTER_00264
9438 VICTIMS/train/VICTIMS_00291
9438 COURT/train/COURT_00136
9438 GUILTY/train/GUILTY_00327
9438 STORY/train/STORY_00771
9438 DAVID/train/DAVID_00648
9438 FOLLOWING/train/FOLLOWING_00764
9438 EXTRA/train/EXTRA_00384
9438 LOOKING/train/LOOKING_00844
9438 AFTERNOON/train/AFTERNOON_00861
9438 JUSTICE/train/JUSTICE_00199
9438 BORDER/train/BORDER_00691
9438 INVOLVED/train/INVOLVED_00565
9438 AHEAD/train/AHEAD_00335
9438 AGAINST/train/AGAINST_00318
9438 WORLD/train/WORLD_00287
9438 DURING/train/DURING_00761
9438 OFFICERS/train/OFFICERS_00477
9438 LIVES/train/LIVES_00035
9438 THREE/train/THREE_00402
9438 SYRIAN/train/SYRIAN_00721
9438 MAJOR/train/MAJOR_00562
9438 CRIME/train/CRIME_00063
9438 JAMES/train/JAMES_00380
9438 WANTS/train/WANTS_00326
9438 PHONE/train/PHONE_00864
9438 EDITOR/train/EDITOR_00816
9438 SECTOR/train/SECTOR_00413
9438 LATEST/train/LATEST_00487
9438 CHILD/train/CHILD_00823
9438 TAKEN/train/TAKEN_00058
9438 SIMPLY/train/SIMPLY_00673
9438 OFFICIALS/train/OFFICIALS_00783
9438 AMONG/train/AMONG_00416
9438 FORMER/train/FORMER_00575
9438 KILLED/train/KILLED_00989
9438 EMERGENCY/train/EMERGENCY_00400
9438 GROWTH/train/GROWTH_00744
9438 ARRESTED/train/ARRESTED_00100
9438 ASKING/train/ASKING_00889
9438 GAMES/train/GAMES_00654
9438 PROBLEM/train/PROBLEM_00917
9438 EMERGENCY/train/EMERGENCY_00321
9438 CALLED/train/CALLED_00524
9438 MONTHS/val/MONTHS_00012
9438 LATEST/train/LATEST_00437
9438 AMERICAN/train/AMERICAN_00117
9438 PRESS/train/PRESS_00256
9438 ACCUSED/train/ACCUSED_00099
9438 ENGLAND/train/ENGLAND_00090
9438 LEGAL/train/LEGAL_00774
9438 HOURS/train/HOURS_00434
9438 CUSTOMERS/train/CUSTOMERS_00568
9438 RESPONSE/train/RESPONSE_00750
9438 FOOTBALL/train/FOOTBALL_00239
9438 OFFICERS/train/OFFICERS_00731
9438 ABUSE/train/ABUSE_00193
9438 LEVELS/train/LEVELS_00632
9438 WANTED/train/WANTED_00530
9438 EDUCATION/train/EDUCATION_00817
9438 REPORTS/train/REPORTS_00832
9438 HEARD/train/HEARD_00393
9438 COMES/train/COMES_00910
9438 FIGURES/train/FIGURES_00420
9438 YESTERDAY/train/YESTERDAY_00365
9438 PARTIES/train/PARTIES_00234
9438 MEASURES/train/MEASURES_00934
9438 MISSING/train/MISSING_00279
9438 TRADE/train/TRADE_00575
9438 ACCUSED/train/ACCUSED_00646
9438 CAMERON/train/CAMERON_00027
9438 HOSPITAL/train/HOSPITAL_00329
9438 ANOTHER/train/ANOTHER_00346
9438 HOSPITAL/train/HOSPITAL_00313
9438 SECOND/train/SECOND_00837
9438 IMPACT/train/IMPACT_00198
9438 OFFICERS/train/OFFICERS_00699
9438 IMMIGRATION/train/IMMIGRATION_00499
9438 ATTACKS/train/ATTACKS_00324
9438 MANCHESTER/train/MANCHESTER_00065
9438 GENERAL/train/GENERAL_00877
9438 DURING/train/DURING_00544
9438 LITTLE/train/LITTLE_00967
9438 SOMEONE/train/SOMEONE_00514
9438 FOLLOWING/train/FOLLOWING_00380
9438 HOUSING/train/HOUSING_00450
9438 MILLIONS/train/MILLIONS_00851
9438 BORDER/train/BORDER_00730
9438 REPORT/train/REPORT_00288
9438 THREAT/train/THREAT_00486
9438 COUPLE/train/COUPLE_00512
9438 EVENING/train/EVENING_00423
9438 DECIDED/train/DECIDED_00319
9438 TONIGHT/train/TONIGHT_00508
9438 MILITARY/test/MILITARY_00019
9438 LONDON/train/LONDON_00552
9438 JAMES/train/JAMES_00626
9438 WARNING/train/WARNING_00933
9438 DESPITE/train/DESPITE_00571
9438 HUNDREDS/train/HUNDREDS_00581
9438 MINISTER/train/MINISTER_00625
9438 OFFICERS/train/OFFICERS_00132
9438 AMONG/train/AMONG_00479
9438 DOING/train/DOING_00991
9438 FOOTBALL/train/FOOTBALL_00756
9438 PRIME/train/PRIME_00051
9438 THIRD/train/THIRD_00596
9438 LATEST/train/LATEST_00792
9438 PARENTS/train/PARENTS_00063
9438 SECOND/train/SECOND_00717
[truncated: 573,205 more chars]
